# Supplementary material for: A constitutional isomer selective chemical proteomic strategy for system-wide profiling of protein lysine 5-hydroxylation
Source: Chem Sci. 2024 Oct 8;15(44):18395–404. doi: 10.1039/d4sc05397d (PMC11474802; doi:10.1039/d4sc05397d)
Supplement: SC-015-D4SC05397D-s001 [file SC-015-D4SC05397D-s001.pdf]

## **Supporting Information**

### **A Constitutional Isomer Selective Chemical Proteomic Strategy for System-wide Profiling of Protein Lysine 5-Hydroxylation**

Yi-Cheng Sin<sup>ab</sup>, Meeyeon Park<sup>a</sup>, Timothy J. Griffin<sup>a</sup>, Jeongsik Yong<sup>\*a</sup>, Yue Chen<sup>\*a</sup>

a. Department of Biochemistry, Molecular Biology and Biophysics, the University of Minnesota at Twin Cities, Minneapolis, Minnesota, USA

b. Bioinformatics and Computational Biology Program, the University of Minnesota at Twin Cities, Minneapolis, Minnesota, USA

\*Correspondence: Dr. Yue Chen (yuechen@umn.edu) or Dr. Jeongsik Yong (jyong@umn.edu)

## **Supporting Information**

### **Supplementary Figures S1-S10**

Figure S1. Mass spectra for the analysis of 1-aminopentan-2-ol, 1-aminopentan-3-ol, and 5-amino-2-pentanol.

Figure S2. Schematic workflow and mass spectra for the analysis of collagen 5-Hyl peptide.

Figure S3. MS/MS neutral loss fragmentation pattern of 5-Hyl peptide ion.

Figure S4. MS/MS spectrum comparison of D<sub>3</sub>- or H<sub>3</sub>- methoxyamine conjugated peptides with in vivo HMGN1 5-hydroxylysine modified peptide as example.

Figure S5. Schematic workflow and replicate analysis of 5-Hyl proteins with enzyme overexpression.

Figure S6. Venn diagram comparison of hydroxylysine identification between this study and previous study.

Figure S7. Example mass spectra for the identification of histone 5-Hyl peptides.

Figure S8. Statistical analysis of label-free quantification of 5-Hyl peptides.

Figure S9. Motif enrichment analysis of 5-Hyl sites identified from the nuclear lysates of control cells or cells overexpressing either short or long form of JMJD6.

Figure S10. Schematic workflow of the chemical pulldown assay for Western blotting and input Western blotting for selected proteins.

Figure S11. Mass spectra for the identification of 5-Hyl peptides on selected proteins.

### **Supplementary Tables S1-S5**

Table S1. The list of 5-Hyl sites and proteins identified from the nuclear lysate proteins and normalized intensities with or without the expression of JMJD6 isoforms.

Table S2. The list of 5-Hyl sites and proteins identified from the acid extraction of 293T cells expressing short-form JMJD6.

Table S3. The list of O-GlcNAcylation sites and proteins identified in the raw data of 5-Hyl protein analysis from the nuclear lysates of 293T cells.

Table S4. Significantly enriched pathways and Gene Ontology among lysine 5-hydroxylation proteome in 293T nuclear lysate analysis.

Table S5. Significantly up- or down-regulated 5-Hyl sites comparing the overexpression of JMJD6 short-form and long-form in 293T cells.



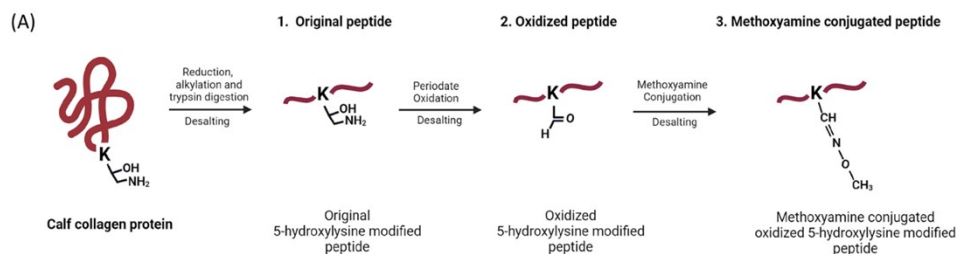

(B) MS1 and MS2 spectrum of the original form of the calf hydroxylysine modified peptide

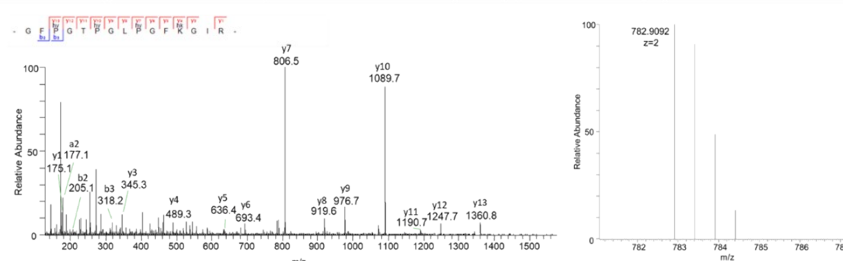

MS1 and MS2 spectrum of the oxidized form of the calf hydroxylysine modified peptide

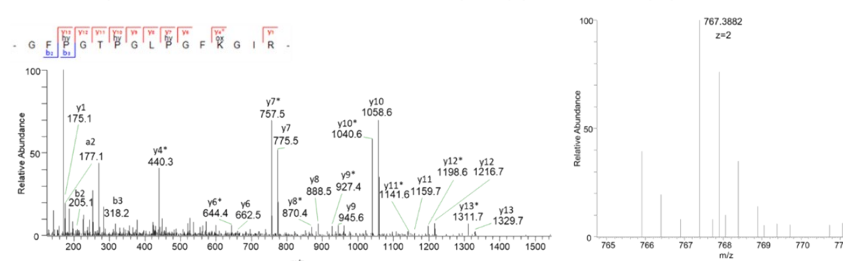

MS1 and MS2 spectrum of the methoxyamine conjugated form of the calf hydroxylysine modified peptide

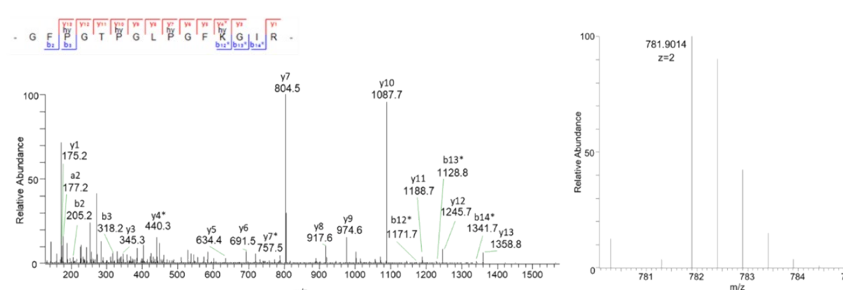

**Figure S2 Schematic workflow and mass spectra for the analysis of collagen 5-Hyl peptide**

(A) Experiment workflow to evaluate the reaction efficiency through digested calf collagen protein.

(B) MS2 fragmentation (left) and MS1 precursor (right) spectra of the collagen tryptic peptide “GFGTPGLPGFKGIR” with no reaction (top panel), periodate oxidation reaction (middle panel) and methoxyamine conjugation reaction (lower panel). ‘hy’ on proline indicated hydroxyproline modification with mass shift of “0”. ‘hk’ on lysine indicated original hydroxylysine modification with mass shift of “0”. ‘ox’ on lysine indicated oxidized hydroxylysine modification with mass shift of “C(-1)H(-5)N(-1)O” and neutral loss of “H(2)O”. ‘hy’ on lysine indicated methoxyamine conjugated oxidized hydroxylysine modification with mass shift of “H(-2)O” and neutral loss of “CH(5)NO”. ‘\*’ indicated a neutral loss signal.

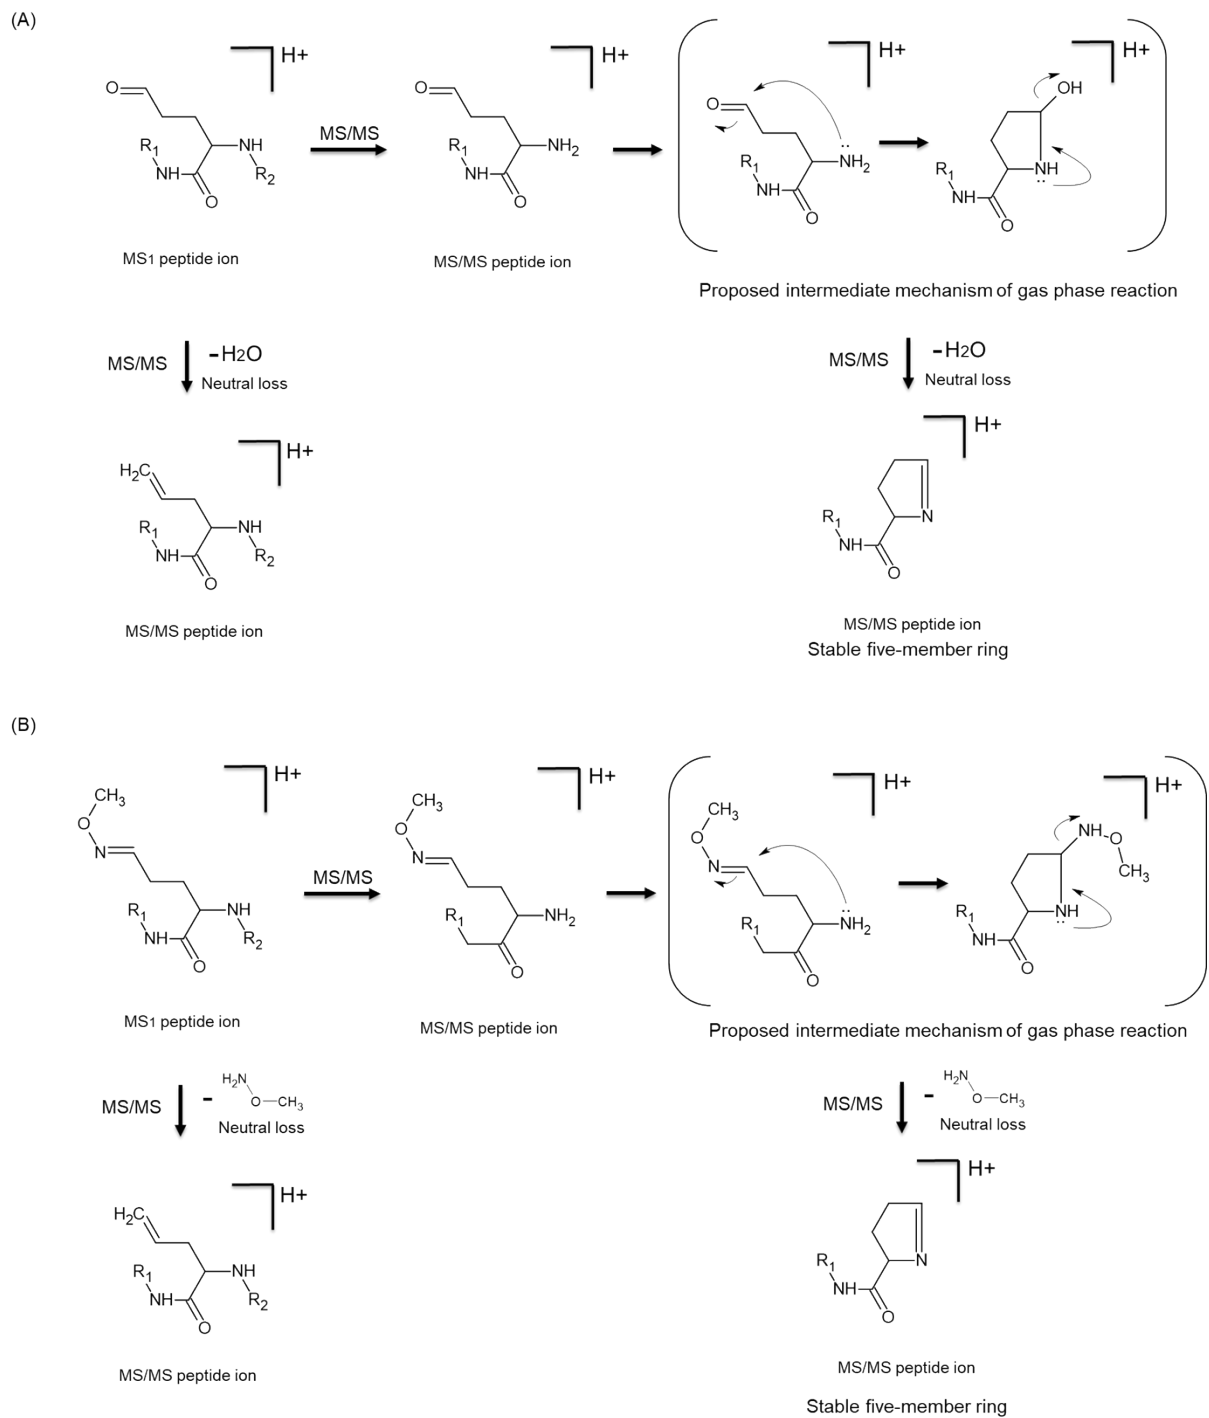

**Figure S3. Proposed MS/MS neutral loss fragmentation mechanism of 5-Hyl peptide ion.**  
 (A) Oxidized 5-Hyl containing peptide. (B) Oxidized 5-Hyl containing peptide with methoxyamine conjugation.

(A)

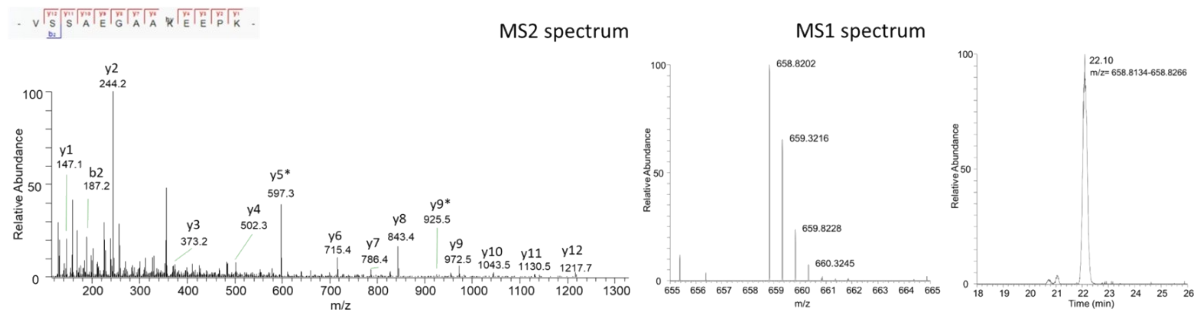

(B)

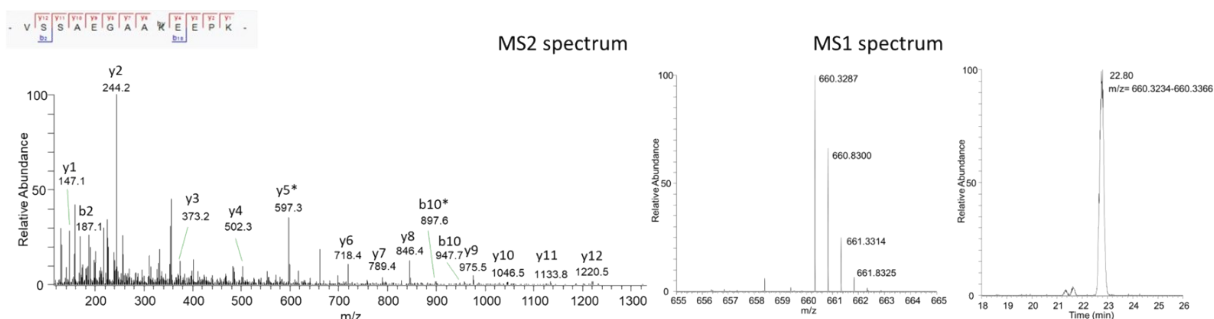

**Figure S4. MS/MS spectrum comparison of D<sub>3</sub>- or H<sub>3</sub>- methoxyamine conjugated peptides with in vivo HMGN1 5-hydroxylysine modified peptide as example. (A) Methoxyamine conjugated peptide. “\*” indicated the neutral loss signal of CH(5)NO. (B) D<sub>3</sub>-Methoxyamine conjugated peptide. “\*” indicated the neutral loss signal of CH(2)D(3)NO.**

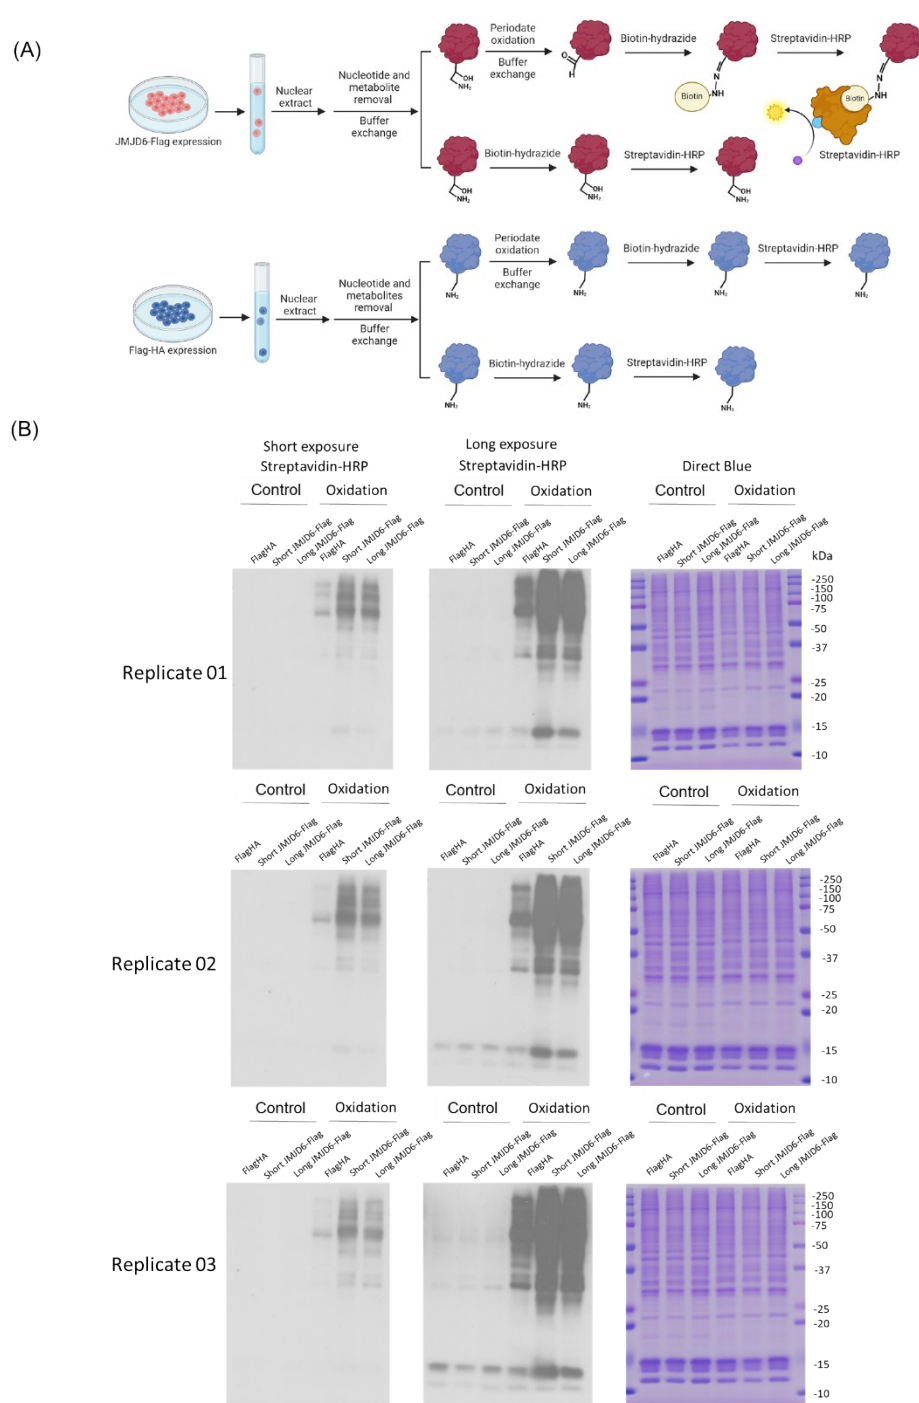

**Figure S5. Schematic workflow and replicate analysis of 5-Hyl proteins with enzyme overexpression.** (A) Experiment workflow to validate 5-Hyl protein abundance changes through biotin hydrazide and streptavidin blotting. (B) Biological triplicate analysis of streptavidin blotting on nuclear lysates with or without periodate oxidation followed by biotin hydrazide conjugation.

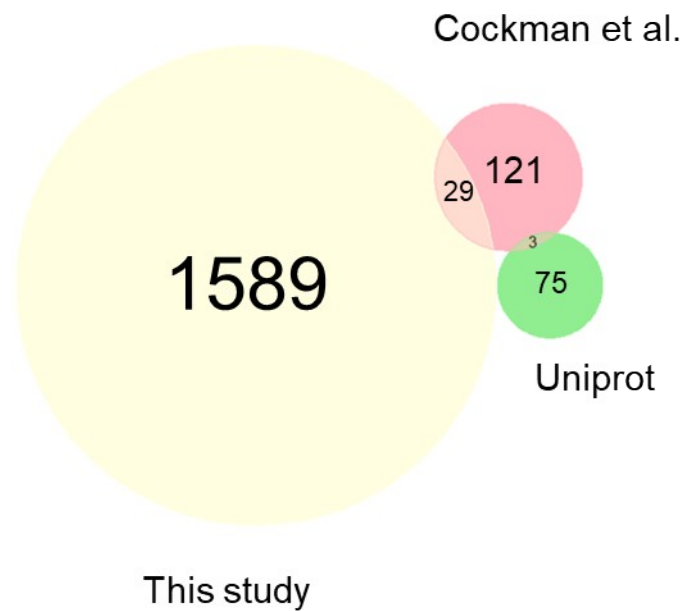

**Figure S6. Venn diagram comparison of hydroxylysine between this study and previous study.** Data included the identified 5-hydroxylysine modification sites in this study and annotated in the Uniprot database (<http://www.uniprot.org>) and hydroxylysine modification site identified in Cockman et al.

(A) H1FO\_hydroxylated spectrum

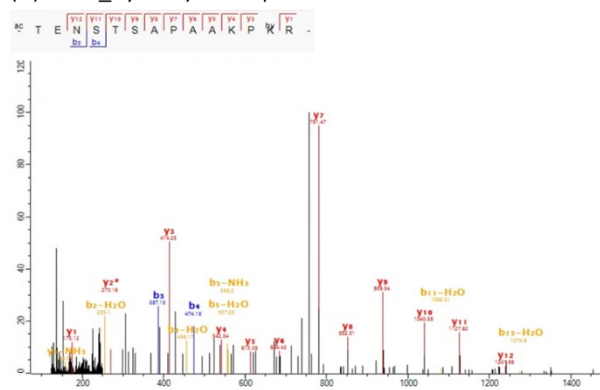

(E) HIST1H2BK\_hydroxylated spectrum

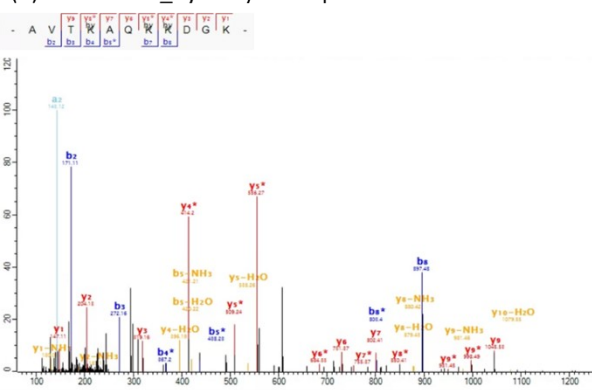

(B) HIST1E\_hydroxylated spectrum

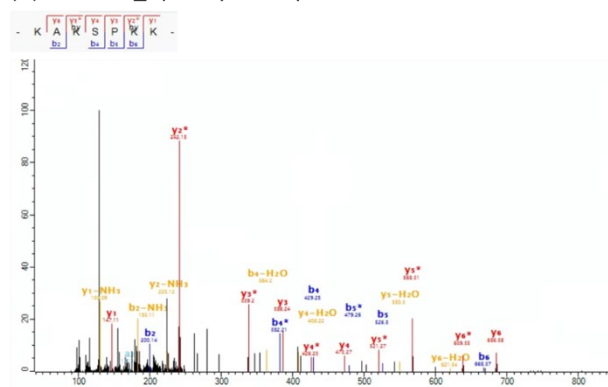

(F) HIST1H2BK\_hydroxylated spectrum

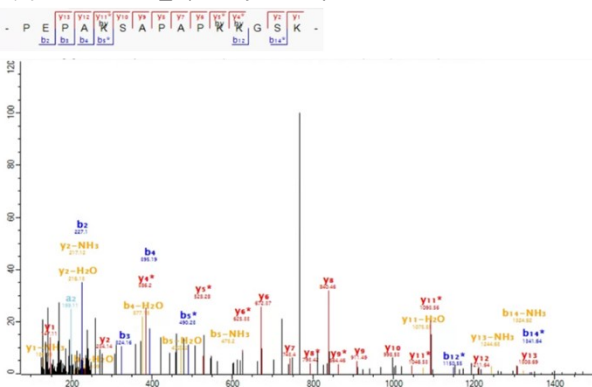

(C) HIST1E\_hydroxylated spectrum

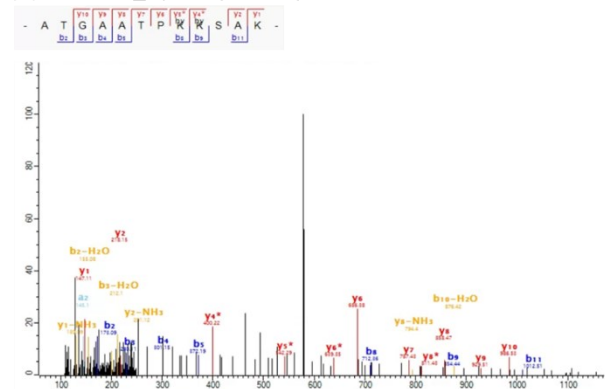

(G) HIST1H2BK\_hydroxylated spectrum

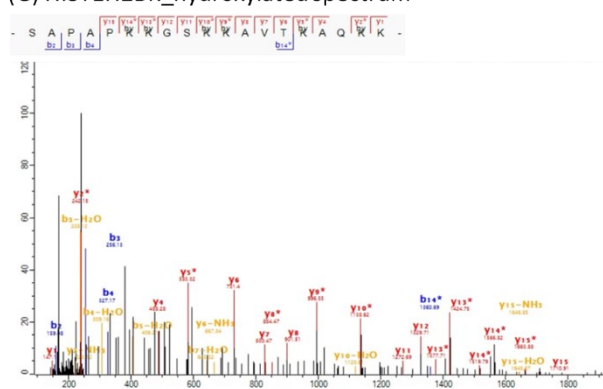

(D) H2AFX\_hydroxylated spectrum

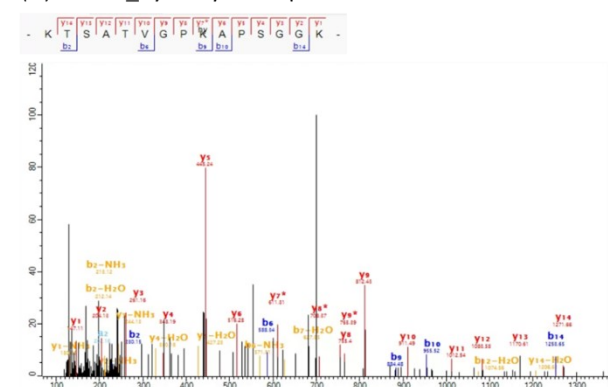

(H) HIST1H2BK\_hydroxylated spectrum

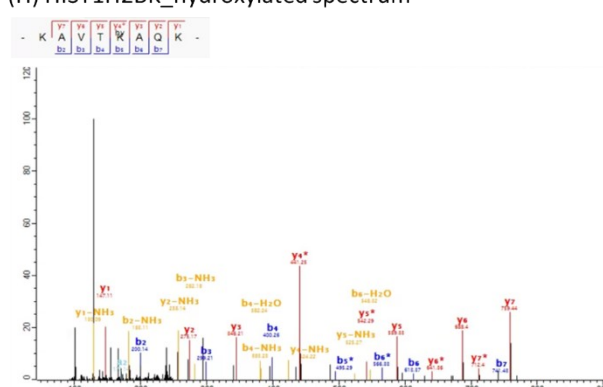

(I) HIST1H2BK\_hydroxylated spectrum

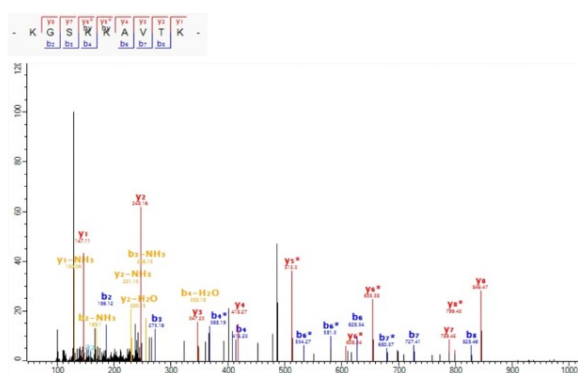

(J) HIST1H2BK\_hydroxylated spectrum

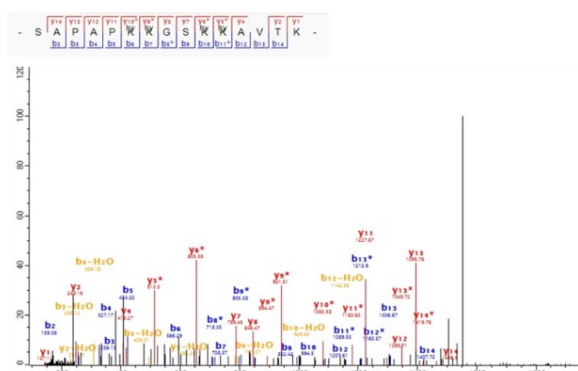

(K) HIST1H2BK\_hydroxylated spectrum

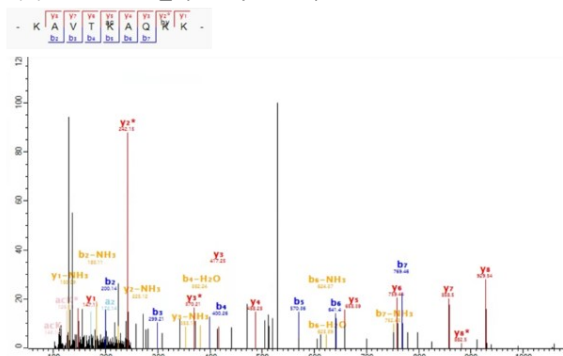

**Figure S7. Example mass spectra for the identification of histone 5-Hyl peptides.** ‘Hy’ indicates methoxyamine-conjugated oxidized 5-Hyl modification. ‘\*’ indicates the neutral loss of methoxyamine conjugated oxidized 5-Hyl modification. ‘ac’ indicates acetylation.

(A)

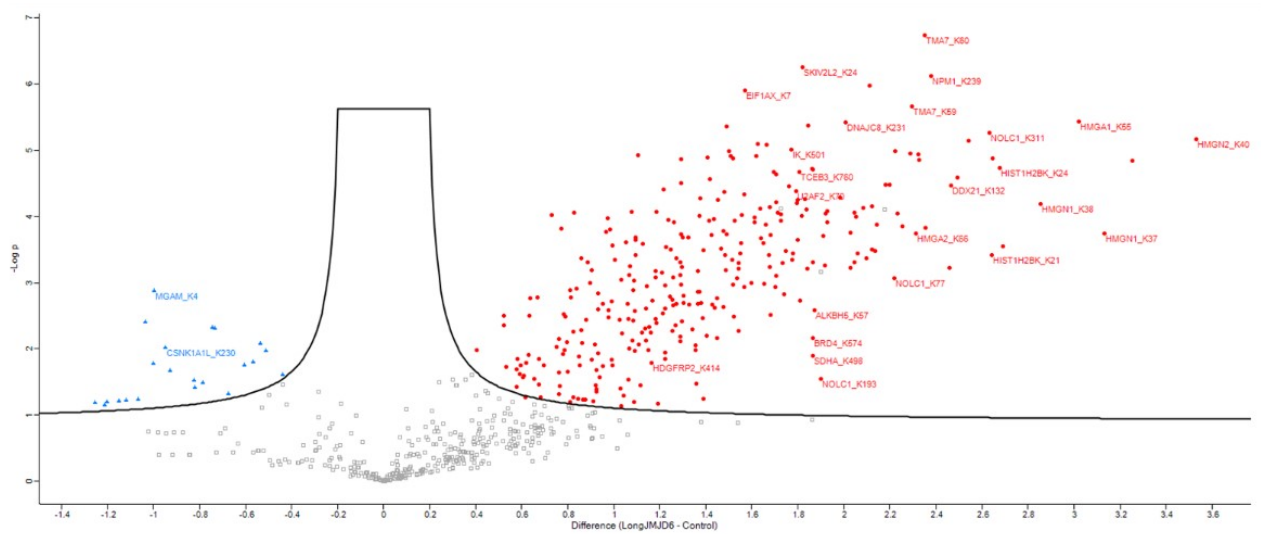

(B)

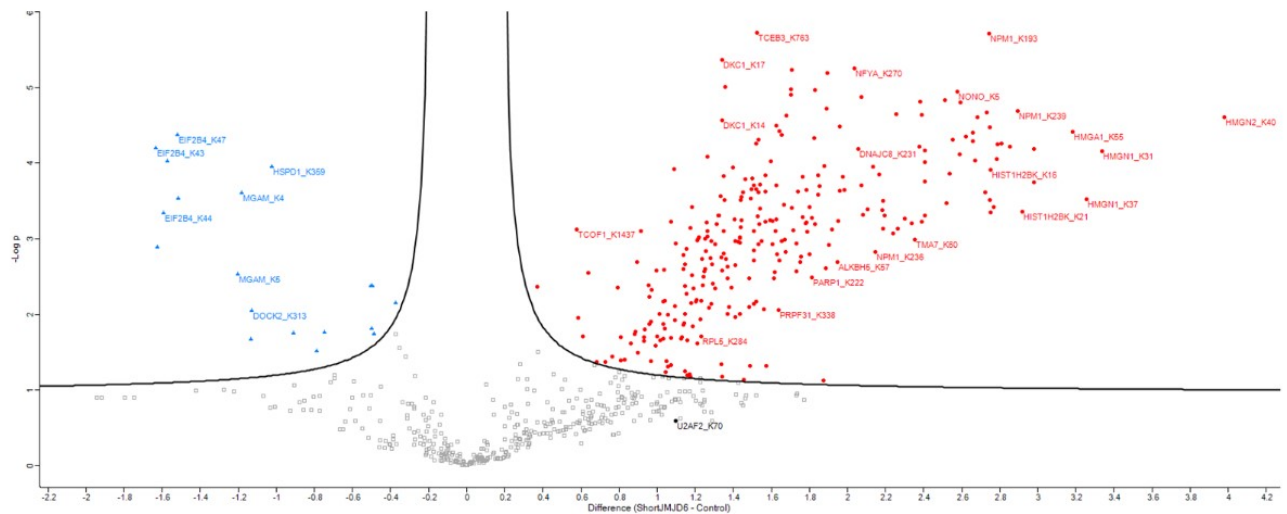

**Figure S8. Statistical analysis of label-free quantification of 5-Hyl peptides.** Volcano plots and statistical analysis of the label-free quantification of 5-Hyl sites mediated by the expression of (A) long form flag-JMJD6 expression or (B) short form flag-JMJD6 overexpression. Statistical analysis was performed with two-samples Student's T test with the permutation-based FDR cutoff of 0.05.

# Control

| motif             | score      | fg.matches | fg.size | bg.matches | bg.size | fold.increase |
|-------------------|------------|------------|---------|------------|---------|---------------|
| .....KK.K.....    | 319.047518 | 41         | 394     | 6309       | 634755  | 10.469676     |
| .....K...K.K..... | 316.871137 | 30         | 353     | 5015       | 628446  | 10.649852     |
| .....KK.....      | 15.65356   | 73         | 323     | 49004      | 623431  | 2.875261      |
| .....K...K.....   | 12.013029  | 55         | 250     | 43516      | 574427  | 2.90408       |
| .....M...K.....   | 9.315648   | 22         | 195     | 11569      | 530911  | 5.177427      |
| .....K...K.....   | 8.402083   | 36         | 173     | 36265      | 519342  | 2.98004       |
| .....K...K.....   | 8.9863     | 34         | 137     | 37426      | 483077  | 3.203327      |
| .....K.....K..... | 6.121407   | 23         | 103     | 30966      | 445651  | 3.213663      |

## 5-Hydroxylysine site motifs with the expression of short-form JMJD6

| motif               | score      | fg.matches | fg.size | bg.matches | bg.size | fold.increase |
|---------------------|------------|------------|---------|------------|---------|---------------|
| .....KK.K.....      | 615.305311 | 101        | 861     | 6309       | 634755  | 11.802223     |
| .....K.KK.K.....    | 327.488855 | 29         | 760     | 1067       | 628446  | 22.474392     |
| .....K...KK.....    | 319.781235 | 54         | 731     | 5085       | 627379  | 9.114134      |
| .....KK.....K.....  | 316.828041 | 41         | 677     | 4466       | 622294  | 8.438633      |
| .....K...K...K..... | 321.616019 | 47         | 636     | 4210       | 617828  | 10.844917     |
| .....KK.....K.....  | 315.275982 | 35         | 589     | 3870       | 613618  | 9.42193       |
| .....K...KK.....    | 314.882156 | 27         | 554     | 3722       | 609748  | 7.984138      |
| .....KK.....        | 307.652656 | 97         | 527     | 42366      | 606026  | 2.632903      |
| .....PK.K.....      | 313.968169 | 20         | 430     | 2350       | 563660  | 11.156061     |
| .....K...K.....     | 13.925206  | 73         | 410     | 36718      | 561310  | 2.721841      |
| .....KK.....        | 14.238586  | 63         | 337     | 32538      | 524592  | 3.013988      |
| .....K...K.....     | 10.493872  | 55         | 274     | 37212      | 492054  | 2.65425       |
| .....K.....K.....   | 7.398048   | 40         | 219     | 31941      | 454842  | 2.600926      |

## 5-Hydroxylysine site motifs with the expression of long-form JMJD6

| motif               | score      | fg.matches | fg.size | bg.matches | bg.size | fold.increase |
|---------------------|------------|------------|---------|------------|---------|---------------|
| .....KK.K.....      | 615.305311 | 93         | 845     | 6309       | 634755  | 11.073167     |
| .....KK...K.....    | 319.631171 | 55         | 752     | 5065       | 628446  | 9.074723      |
| .....K...K...K..... | 315.887674 | 41         | 697     | 4679       | 623381  | 7.837032      |
| .....K.K...K.....   | 317.583192 | 41         | 656     | 4736       | 618702  | 8.164881      |
| .....KK.....K.....  | 314.817854 | 32         | 615     | 3539       | 613966  | 9.0269        |
| .....K...K...K..... | 318.812646 | 39         | 583     | 4139       | 610427  | 9.865847      |
| .....K.K.K.....     | 314.426271 | 28         | 544     | 4108       | 606288  | 7.596397      |
| .....KK.....        | 307.652656 | 95         | 516     | 39020      | 602180  | 2.841273      |
| .....K...K.....     | 15.65356   | 81         | 421     | 39543      | 563160  | 2.740092      |
| .....KK.....        | 13.790237  | 66         | 340     | 35755      | 523617  | 2.842772      |
| .....K...K.....     | 10.129158  | 53         | 274     | 35264      | 487862  | 2.676028      |
| .....K...R.....     | 7.098289   | 36         | 221     | 27397      | 452598  | 2.691038      |
| .....K...K.....     | 6.499008   | 32         | 185     | 27254      | 425201  | 2.698623      |

**Figure S9. Motif enrichment analysis of 5-Hyl sites identified from the nuclear lysates of control cells or cells overexpressing either short or long form of JMJD6.**

(A)

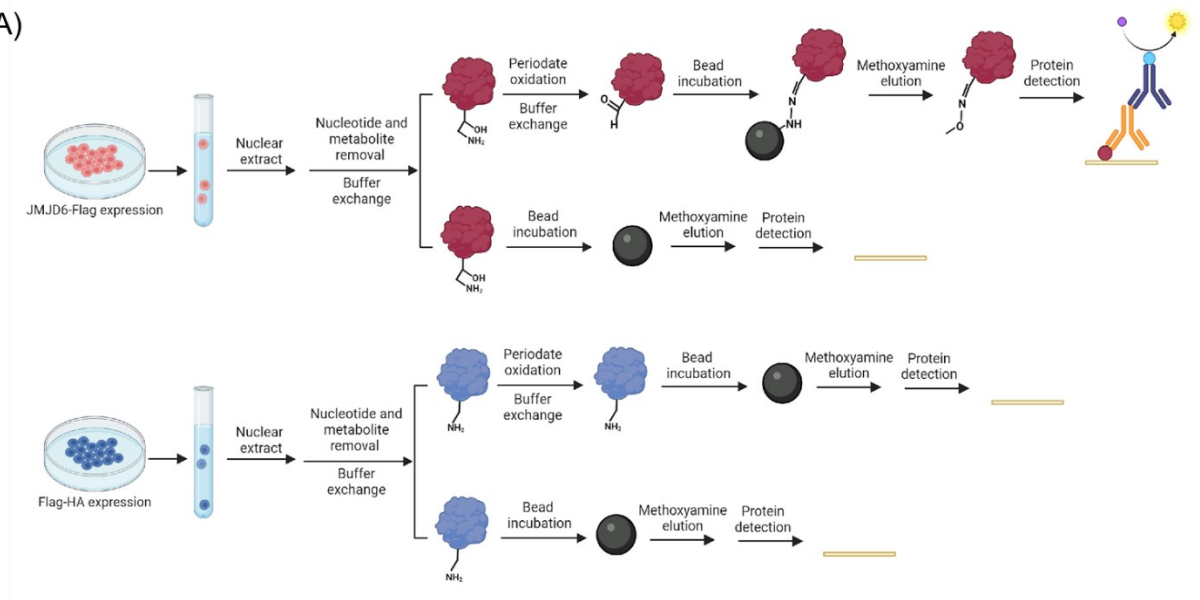

(B)

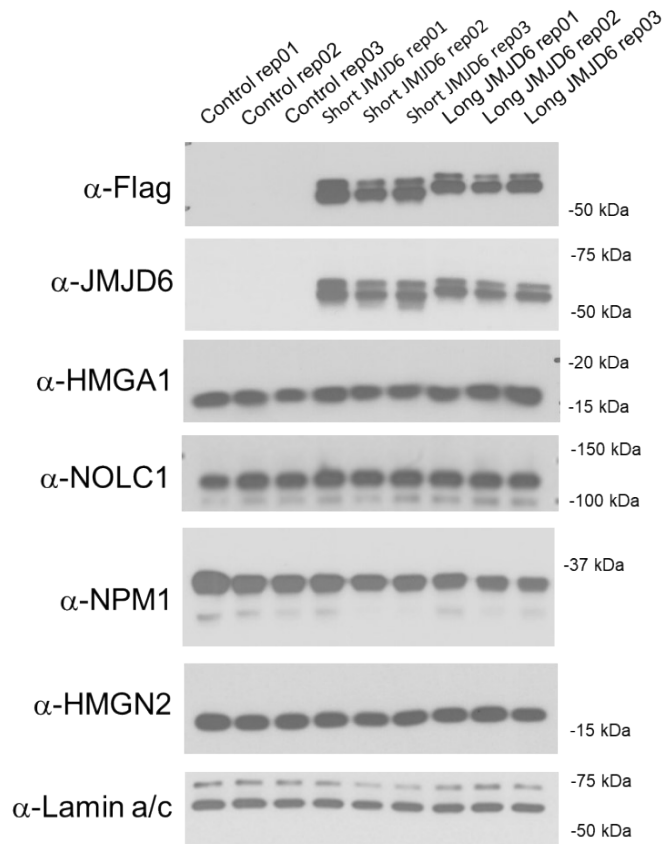

**Figure S10. Schematic workflow of the chemical pulldown assay for Western blotting and input Western blotting for selected proteins.** (A) Experiment workflow for chemical pulldown assay and (B) Western blotting of the inputs of all the experiment groups.

- L Q T P N T F P K R -

Y1 Y2 Y3 Y4 Y5 Y6 Y7 Y8 Y9 Y10 Y11 Y12 Y13 Y14 Y15 Y16 Y17 Y18 Y19 Y20 Y21 Y22 Y23 Y24 Y25 Y26 Y27 Y28 Y29 Y30 Y31 Y32 Y33 Y34 Y35 Y36 Y37 Y38 Y39 Y40 Y41 Y42 Y43 Y44 Y45 Y46 Y47 Y48 Y49 Y50 Y51 Y52 Y53 Y54 Y55 Y56 Y57 Y58 Y59 Y60 Y61 Y62 Y63 Y64 Y65 Y66 Y67 Y68 Y69 Y70 Y71 Y72 Y73 Y74 Y75 Y76 Y77 Y78 Y79 Y80 Y81 Y82 Y83 Y84 Y85 Y86 Y87 Y88 Y89 Y90 Y91 Y92 Y93 Y94 Y95 Y96 Y97 Y98 Y99 Y100

Y1 Y2 Y3 Y4 Y5 Y6 Y7 Y8 Y9 Y10 Y11 Y12 Y13 Y14 Y15 Y16 Y17 Y18 Y19 Y20 Y21 Y22 Y23 Y24 Y25 Y26 Y27 Y28 Y29 Y30 Y31 Y32 Y33 Y34 Y35 Y36 Y37 Y38 Y39 Y40 Y41 Y42 Y43 Y44 Y45 Y46 Y47 Y48 Y49 Y50 Y51 Y52 Y53 Y54 Y55 Y56 Y57 Y58 Y59 Y60 Y61 Y62 Y63 Y64 Y65 Y66 Y67 Y68 Y69 Y70 Y71 Y72 Y73 Y74 Y75 Y76 Y77 Y78 Y79 Y80 Y81 Y82 Y83 Y84 Y85 Y86 Y87 Y88 Y89 Y90 Y91 Y92 Y93 Y94 Y95 Y96 Y97 Y98 Y99 Y100

Y1 Y2 Y3 Y4 Y5 Y6 Y7 Y8 Y9 Y10 Y11 Y12 Y13 Y14 Y15 Y16 Y17 Y18 Y19 Y20 Y21 Y22 Y23 Y24 Y25 Y26 Y27 Y28 Y29 Y30 Y31 Y32 Y33 Y34 Y35 Y36 Y37 Y38 Y39 Y40 Y41 Y42 Y43 Y44 Y45 Y46 Y47 Y48 Y49 Y50 Y51 Y52 Y53 Y54 Y55 Y56 Y57 Y58 Y59 Y60 Y61 Y62 Y63 Y64 Y65 Y66 Y67 Y68 Y69 Y70 Y71 Y72 Y73 Y74 Y75 Y76 Y77 Y78 Y79 Y80 Y81 Y82 Y83 Y84 Y85 Y86 Y87 Y88 Y89 Y90 Y91 Y92 Y93 Y94 Y95 Y96 Y97 Y98 Y99 Y100

SESSSSSSSQPLASSQIEK-

**Figure S6.** IR spectrum of the polymer film ( $\text{CH}_2\text{Cl}_2$ ). The inset shows the chemical structure of the polymer repeat unit. The main spectrum displays characteristic absorption bands corresponding to various functional groups present in the polymer structure.

**Figure S11. Mass spectra for the identification of 5-Hyl peptides on selected proteins.** ‘Hy’ indicates methoxyamine-conjugated oxidized 5-Hyl modification. ‘\*’ indicates the neutral loss of methoxyamine conjugated oxidized 5-Hyl modification.
