# Supplementary material for: A constitutional isomer selective chemical proteomic strategy for system-wide profiling of protein lysine 5-hydroxylation
Source: Chem Sci. 2024 Oct 8;15(44):18395–404. doi: 10.1039/d4sc05397d (PMC11474802; doi:10.1039/d4sc05397d)
Supplement: SC-015-D4SC05397D-s002 [file SC-015-D4SC05397D-s002.xlsx]

## Sheet: Hydroxylysine_methoxyamineSites
Fasta headers	Proteins	Positions within proteins	Protein_position	Score	Hydroxylysine_methoxyamine Probabilities	Charge	Mass error [ppm]	Normalized Intensities (x10^6)
								Control01	Control02	Control03	LongJMJD6flag01	LongJMJD6flag02	LongJMJD6flag03	ShortJMJD6flag01	ShortJMJD6flag02	ShortJMJD6flag03
sp|A0A087WXM9|MEIKN_HUMAN Meiosis-specific kinetochore protein OS=Homo sapiens OX=9606 GN=MEIKIN PE=2 SV=2	A0A087WXM9	256	A0A087WXM9_K256	55.196	TK(1)K(1)K(1)K(1)TNSSTPGKK	3	-2.8901	656.778	0	0	0	0	0	0	0	0
sp|A0A087WXM9|MEIKN_HUMAN Meiosis-specific kinetochore protein OS=Homo sapiens OX=9606 GN=MEIKIN PE=2 SV=2	A0A087WXM9	257	A0A087WXM9_K257	55.196	TK(1)K(1)K(1)K(1)TNSSTPGKK	3	-2.8901	656.778	0	0	0	0	0	0	0	0
sp|A0A087WXM9|MEIKN_HUMAN Meiosis-specific kinetochore protein OS=Homo sapiens OX=9606 GN=MEIKIN PE=2 SV=2	A0A087WXM9	258	A0A087WXM9_K258	55.196	TK(1)K(1)K(1)K(1)TNSSTPGKK	3	-2.8901	656.778	0	0	0	0	0	0	0	0
sp|A0A087WXM9|MEIKN_HUMAN Meiosis-specific kinetochore protein OS=Homo sapiens OX=9606 GN=MEIKIN PE=2 SV=2	A0A087WXM9	259	A0A087WXM9_K259	55.196	TK(1)K(1)K(1)K(1)TNSSTPGKK	3	-2.8901	656.778	0	0	0	0	0	0	0	0
sp|A0A0J9YWL9|TX13C_HUMAN Putative testis-expressed protein 13C OS=Homo sapiens OX=9606 GN=TEX13C PE=5 SV=1	A0A0J9YWL9	486	A0A0J9YWL9_K486	42.864	K(1)VPMMPK	2	1.1667	140.334	0	323.628	929.568	0	0	208.482	265.014	982.509
sp|A0A494C071|PWWP4_HUMAN PWWP domain-containing DNA repair factor 4 OS=Homo sapiens OX=9606 GN=PWWP4 PE=3 SV=1	A0A494C071	876	A0A494C071_K876	43.801	K(1)CTATGSTPGALPGDRSGVSK(1)ATAPAPGALCSER	3	-1.3371	2737.09	1577.92	2802.54	2651.35	0	0	0	5042.05	1334.99
sp|A0A494C071|PWWP4_HUMAN PWWP domain-containing DNA repair factor 4 OS=Homo sapiens OX=9606 GN=PWWP4 PE=3 SV=1	A0A494C071	896	A0A494C071_K896	43.801	K(1)CTATGSTPGALPGDRSGVSK(1)ATAPAPGALCSER	3	-1.3371	2737.09	1577.92	2802.54	2651.35	0	0	0	5042.05	1334.99
sp|A4D1E1|Z804B_HUMAN Zinc finger protein 804B OS=Homo sapiens OX=9606 GN=ZNF804B PE=2 SV=2	A4D1E1	1176	A4D1E1_K1176	42.382	ILQLQAQQHMQK(0.003)QLLSK(0.997)HLR	4	-0.93554	0	1681.49	0	0	0	0	0	0	0
sp|A4FU69|EFCB5_HUMAN EF-hand calcium-binding domain-containing protein 5 OS=Homo sapiens OX=9606 GN=EFCAB5 PE=1 SV=3	A4FU69	21	A4FU69_K21	86.344	KEDK(0.921)ERK(0.079)WNLTEVK	2	1.4447	0	0	0	0	0	0	0	0	0
sp|A6NCM1|IQCAL_HUMAN IQ and AAA domain-containing protein 1-like OS=Homo sapiens OX=9606 GN=IQCA1L PE=3 SV=3	A6NCM1	797	A6NCM1_K797	44.312	TPLGK(0.219)K(0.098)SMK(0.683)HRMDQLEAEEAK(0.999)LDK	3	-2.1854	0	0	15793.8	0	0	0	0	0	0
sp|A6NCM1|IQCAL_HUMAN IQ and AAA domain-containing protein 1-like OS=Homo sapiens OX=9606 GN=IQCA1L PE=3 SV=3	A6NCM1	809	A6NCM1_K809	44.312	TPLGK(0.219)K(0.098)SMK(0.683)HRMDQLEAEEAK(0.999)LDK	3	-2.1854	0	0	15793.8	0	0	0	0	0	0
sp|A6NIH7|U119B_HUMAN Protein unc-119 homolog B OS=Homo sapiens OX=9606 GN=UNC119B PE=1 SV=1	A6NIH7	7	A6NIH7_K7	53.861	SGSNPK(1)AAAAASAAGPGGLVAGK	2	1.2091	0	0	0	0	0	0	0	0	0
sp|A6NIV6|LRIQ4_HUMAN Leucine-rich repeat and IQ domain-containing protein 4 OS=Homo sapiens OX=9606 GN=LRRIQ4 PE=4 SV=2	A6NIV6	547	A6NIV6_K547	70.399	GK(0.998)K(0.998)DVK(0.004)GK(0.017)PGK(0.983)GK	2	0.40729	0	8590.19	12333.4	21365.3	21241.5	16999	0	16854.7	18029.8
sp|A6NIV6|LRIQ4_HUMAN Leucine-rich repeat and IQ domain-containing protein 4 OS=Homo sapiens OX=9606 GN=LRRIQ4 PE=4 SV=2	A6NIV6	548	A6NIV6_K548	70.399	GK(0.998)K(0.998)DVK(0.004)GK(0.017)PGK(0.983)GK	2	0.40729	0	8590.19	12333.4	21365.3	21241.5	16999	0	16854.7	18029.8
sp|A6NIV6|LRIQ4_HUMAN Leucine-rich repeat and IQ domain-containing protein 4 OS=Homo sapiens OX=9606 GN=LRRIQ4 PE=4 SV=2	A6NIV6	556	A6NIV6_K556	70.399	GK(0.998)K(0.998)DVK(0.004)GK(0.017)PGK(0.983)GK	2	0.40729	0	8590.19	12333.4	21365.3	21241.5	16999	0	16854.7	18029.8
sp|A6NNS2|DRS7C_HUMAN Dehydrogenase/reductase SDR family member 7C OS=Homo sapiens OX=9606 GN=DHRS7C PE=2 SV=3	A6NNS2	269	A6NNS2_K269	55.33	RK(1)K(1)QEVFMANPIPKAAVYVR	3	4.1521	0	0	0	0	0	0	0	0	0
sp|A6NNS2|DRS7C_HUMAN Dehydrogenase/reductase SDR family member 7C OS=Homo sapiens OX=9606 GN=DHRS7C PE=2 SV=3	A6NNS2	270	A6NNS2_K270	55.33	RK(1)K(1)QEVFMANPIPKAAVYVR	3	4.1521	0	0	0	0	0	0	0	0	0
sp|A6PVS8|LRIQ3_HUMAN Leucine-rich repeat and IQ domain-containing protein 3 OS=Homo sapiens OX=9606 GN=LRRIQ3 PE=1 SV=1	A6PVS8	567	A6PVS8_K567	61.435	K(0.001)NLLK(0.999)EMK(1)K(1)VR	2	0.17578	0	0	4160.99	0	11471.7	7777.55	3572.17	0	0
sp|A6PVS8|LRIQ3_HUMAN Leucine-rich repeat and IQ domain-containing protein 3 OS=Homo sapiens OX=9606 GN=LRRIQ3 PE=1 SV=1	A6PVS8	570	A6PVS8_K570	61.435	K(0.001)NLLK(0.999)EMK(1)K(1)VR	2	0.17578	0	0	4160.99	0	11471.7	7777.55	3572.17	0	0
sp|A6PVS8|LRIQ3_HUMAN Leucine-rich repeat and IQ domain-containing protein 3 OS=Homo sapiens OX=9606 GN=LRRIQ3 PE=1 SV=1	A6PVS8	571	A6PVS8_K571	61.435	K(0.001)NLLK(0.999)EMK(1)K(1)VR	2	0.17578	0	0	4160.99	0	11471.7	7777.55	3572.17	0	0
sp|A8MVM7|YD021_HUMAN Putative uncharacterized protein ENSP00000382790 OS=Homo sapiens OX=9606 PE=5 SV=3	A8MVM7	306	A8MVM7_K306	55.546	WK(0.977)REGK(0.023)LHNHGTVDWNSKR	3	-2.5463	0	8516.96	0	0	0	0	0	0	0
sp|A8MVX0|ARG33_HUMAN Rho guanine nucleotide exchange factor 33 OS=Homo sapiens OX=9606 GN=ARHGEF33 PE=2 SV=2	A8MVX0	453	A8MVX0_K453	55.112	RK(0.965)K(0.965)LK(0.071)K(0.999)SSMAK	2	-2.1946	0	0	0	3156.85	3135.89	0	1360.3	0	0
sp|A8MVX0|ARG33_HUMAN Rho guanine nucleotide exchange factor 33 OS=Homo sapiens OX=9606 GN=ARHGEF33 PE=2 SV=2	A8MVX0	454	A8MVX0_K454	55.112	RK(0.965)K(0.965)LK(0.071)K(0.999)SSMAK	2	-2.1946	0	0	0	3156.85	3135.89	0	1360.3	0	0
sp|A8MVX0|ARG33_HUMAN Rho guanine nucleotide exchange factor 33 OS=Homo sapiens OX=9606 GN=ARHGEF33 PE=2 SV=2	A8MVX0	457	A8MVX0_K457	55.112	RK(0.965)K(0.965)LK(0.071)K(0.999)SSMAK	2	-2.1946	0	0	0	3156.85	3135.89	0	1360.3	0	0
sp|A8TX70|CO6A5_HUMAN Collagen alpha-5(VI) chain OS=Homo sapiens OX=9606 GN=COL6A5 PE=1 SV=1	A8TX70	564	A8TX70_K564	111.69	VVEPAK(1)R	2	0.084516	2000.61	0	2716.95	5753.36	3843.59	4366.43	0	0	0
sp|B2RPK0|HGB1A_HUMAN Putative high mobility group protein B1-like 1 OS=Homo sapiens OX=9606 GN=HMGB1P1 PE=5 SV=1	B2RPK0	167	B2RPK0_K167	95.358	GK(1)PEAAK	1	-0.11027	0	0	0	0	0	0	569.415	1431.18	1062.08
sp|C0HMA1|P155_HUMAN HSPA8-interacting micropeptide miPEP155 OS=Homo sapiens OX=9606 GN=MIR155HG PE=1 SV=1	C0HMA1	12	C0HMA1_K12	57.149	MEMALMVAQTRK(1)GK	2	2.2439	0	0	0	0	0	0	0	0	0
sp|H3BMG3|SMKR1_HUMAN Small lysine-rich protein 1 OS=Homo sapiens OX=9606 GN=SMKR1 PE=4 SV=1	H3BMG3	7	H3BMG3_K7	42.348	GK(0.067)K(0.961)GK(0.961)GQGK(0.011)SHGK	1	1.3609	59.2957	0	0	0	0	0	0	0	59.4339
sp|H3BMG3|SMKR1_HUMAN Small lysine-rich protein 1 OS=Homo sapiens OX=9606 GN=SMKR1 PE=4 SV=1	H3BMG3	9	H3BMG3_K9	42.348	GK(0.067)K(0.961)GK(0.961)GQGK(0.011)SHGK	1	1.3609	59.2957	0	0	0	0	0	0	0	59.4339
sp|O00255|MEN1_HUMAN Menin OS=Homo sapiens OX=9606 GN=MEN1 PE=1 SV=5	O00255	604	O00255_K604	89.507	VSTPSDYTLSFLK(1)R	2	-0.16142	0	0	0	0	0	5817.09	2629.02	0	5916.01
sp|O00294|TULP1_HUMAN Tubby-related protein 1 OS=Homo sapiens OX=9606 GN=TULP1 PE=1 SV=3	O00294	267	O00294_K267	46.457	GK(1)AK(1)GK(1)GK(1)K(1)K(1)AK	2	2.2915	0	0	0	0	0	0	0	0	0
sp|O00294|TULP1_HUMAN Tubby-related protein 1 OS=Homo sapiens OX=9606 GN=TULP1 PE=1 SV=3	O00294	269	O00294_K269	46.457	GK(1)AK(1)GK(1)GK(1)K(1)K(1)AK	2	2.2915	0	0	0	0	0	0	0	0	0
sp|O00294|TULP1_HUMAN Tubby-related protein 1 OS=Homo sapiens OX=9606 GN=TULP1 PE=1 SV=3	O00294	271	O00294_K271	46.457	GK(1)AK(1)GK(1)GK(1)K(1)K(1)AK	2	2.2915	0	0	0	0	0	0	0	0	0
sp|O00294|TULP1_HUMAN Tubby-related protein 1 OS=Homo sapiens OX=9606 GN=TULP1 PE=1 SV=3	O00294	273	O00294_K273	46.457	GK(1)AK(1)GK(1)GK(1)K(1)K(1)AK	2	2.2915	0	0	0	0	0	0	0	0	0
sp|O00294|TULP1_HUMAN Tubby-related protein 1 OS=Homo sapiens OX=9606 GN=TULP1 PE=1 SV=3	O00294	274	O00294_K274	46.457	GK(1)AK(1)GK(1)GK(1)K(1)K(1)AK	2	2.2915	0	0	0	0	0	0	0	0	0
sp|O00294|TULP1_HUMAN Tubby-related protein 1 OS=Homo sapiens OX=9606 GN=TULP1 PE=1 SV=3	O00294	275	O00294_K275	46.457	GK(1)AK(1)GK(1)GK(1)K(1)K(1)AK	2	2.2915	0	0	0	0	0	0	0	0	0
sp|O00294|TULP1_HUMAN Tubby-related protein 1 OS=Homo sapiens OX=9606 GN=TULP1 PE=1 SV=3	O00294	233	O00294_K233	61.435	SPAAMFLVGEGSPDK(1)K	2	2.1045	0	0	0	0	0	0	0	0	0
sp|O00479|HMGN4_HUMAN High mobility group nucleosome-binding domain-containing protein 4 OS=Homo sapiens OX=9606 GN=HMGN4 PE=1 SV=3	O00479	42	O00479_K42	78.848	LSAKPAPPKPEPRPK(1)K(1)ASAK	4	1.0224	0	0	0	0	0	0	0	11790	15821.3
sp|O00479|HMGN4_HUMAN High mobility group nucleosome-binding domain-containing protein 4 OS=Homo sapiens OX=9606 GN=HMGN4 PE=1 SV=3	O00479	43	O00479_K43	78.848	LSAKPAPPKPEPRPK(1)K(1)ASAK	4	1.0224	0	0	0	0	0	0	0	11790	15821.3
sp|O00541|PESC_HUMAN Pescadillo homolog OS=Homo sapiens OX=9606 GN=PES1 PE=1 SV=1	O00541	564	O00541_K564	65.265	K(0.006)IREANK(0.95)LAEK(0.698)RK(0.346)AHDEAVR	3	-2.063	0	215.46	0	579.016	439.114	334.284	0	0	0
sp|O00541|PESC_HUMAN Pescadillo homolog OS=Homo sapiens OX=9606 GN=PES1 PE=1 SV=1	O00541	568	O00541_K568	65.265	K(0.006)IREANK(0.95)LAEK(0.698)RK(0.346)AHDEAVR	3	-2.063	0	215.46	0	579.016	439.114	334.284	0	0	0
sp|O00566|MPP10_HUMAN U3 small nucleolar ribonucleoprotein protein MPP10 OS=Homo sapiens OX=9606 GN=MPHOSPH10 PE=1 SV=2	O00566	627	O00566_K627	77.387	TGK(1)ASFIKDEGK	3	-0.25854	0	0	0	4291.38	3102.31	1882.63	0	6227.42	4502.91
sp|O00567|NOP56_HUMAN Nucleolar protein 56 OS=Homo sapiens OX=9606 GN=NOP56 PE=1 SV=4	O00567	533	O00567_K533	120.9	EELMSSDLEETAGSTSIPK(1)R	2	-0.23628	0	0	0	12301.3	12859.5	6928.9	9362.72	23246.6	0
sp|O00567|NOP56_HUMAN Nucleolar protein 56 OS=Homo sapiens OX=9606 GN=NOP56 PE=1 SV=4	O00567	536	O00567_K536	65.175	K(0.936)STPK(0.064)EETVNDPEEAGHR	3	1.2795	0	0	0	0	0	0	1605.94	0	0
sp|O00567|NOP56_HUMAN Nucleolar protein 56 OS=Homo sapiens OX=9606 GN=NOP56 PE=1 SV=4	O00567	540	O00567_K540	157.2	STPK(1)EETVNDPEEAGHR	2	-0.14292	0	0	0	30047.1	33027.8	13750.7	9250.65	34685.3	34009.1
sp|O00567|NOP56_HUMAN Nucleolar protein 56 OS=Homo sapiens OX=9606 GN=NOP56 PE=1 SV=4	O00567	288	O00567_K288	92.8	SK(1)MSQVAPSLSALIGEAVGAR	3	-0.64265	0	6494.9	0	15338.2	0	11475.4	8226.25	12236.2	0
sp|P47813|IF1AX_HUMAN Eukaryotic translation initiation factor 1A, X-chromosomal OS=Homo sapiens OX=9606 GN=EIF1AX PE=1 SV=2;sp|O14602|IF1AY_HUMAN Eukaryotic translation initiation factor 1A, Y-chromosomal OS=Homo sapiens OX=9606 GN=EIF1AY PE=1 SV=4	P47813;O14602	3;3	P47813_K3	93.011	PK(1)NK(1)GK(1)GGK(1)NR	2	0.071654	0	0	0	21802.6	17164.6	19125.3	27202.5	43100	0
sp|P47813|IF1AX_HUMAN Eukaryotic translation initiation factor 1A, X-chromosomal OS=Homo sapiens OX=9606 GN=EIF1AX PE=1 SV=2;sp|O14602|IF1AY_HUMAN Eukaryotic translation initiation factor 1A, Y-chromosomal OS=Homo sapiens OX=9606 GN=EIF1AY PE=1 SV=4	P47813;O14602	5;5	P47813_K5	93.011	PK(1)NK(1)GK(1)GGK(1)NR	2	0.071654	0	0	0	21802.6	17164.6	19125.3	27202.5	43100	0
sp|P47813|IF1AX_HUMAN Eukaryotic translation initiation factor 1A, X-chromosomal OS=Homo sapiens OX=9606 GN=EIF1AX PE=1 SV=2;sp|O14602|IF1AY_HUMAN Eukaryotic translation initiation factor 1A, Y-chromosomal OS=Homo sapiens OX=9606 GN=EIF1AY PE=1 SV=4	P47813;O14602	7;7	P47813_K7	93.011	PK(1)NK(1)GK(1)GGK(1)NR	2	0.071654	0	0	0	21802.6	17164.6	19125.3	27202.5	43100	0
sp|P47813|IF1AX_HUMAN Eukaryotic translation initiation factor 1A, X-chromosomal OS=Homo sapiens OX=9606 GN=EIF1AX PE=1 SV=2;sp|O14602|IF1AY_HUMAN Eukaryotic translation initiation factor 1A, Y-chromosomal OS=Homo sapiens OX=9606 GN=EIF1AY PE=1 SV=4	P47813;O14602	10;10	P47813_K10	93.011	PK(1)NK(1)GK(1)GGK(1)NR	2	0.071654	0	0	0	21802.6	17164.6	19125.3	27202.5	43100	0
sp|O14782|KIF3C_HUMAN Kinesin-like protein KIF3C OS=Homo sapiens OX=9606 GN=KIF3C PE=1 SV=4	O14782	488	O14782_K488	67.726	QK(1)LLEEKEKMLEDLR	2	1.0168	0	0	0	0	0	0	10135	0	0
sp|O15041|SEM3E_HUMAN Semaphorin-3E OS=Homo sapiens OX=9606 GN=SEMA3E PE=1 SV=1	O15041	748	O15041_K748	53.554	LK(0.009)MSPSK(0.995)WK(0.996)YANPQEK(1)K(1)LRSK	3	0.0068716	466947	235599	431096	670188	238334	0	0	0	416700
sp|O15041|SEM3E_HUMAN Semaphorin-3E OS=Homo sapiens OX=9606 GN=SEMA3E PE=1 SV=1	O15041	750	O15041_K750	53.554	LK(0.009)MSPSK(0.995)WK(0.996)YANPQEK(1)K(1)LRSK	3	0.0068716	466947	235599	431096	670188	238334	0	0	0	416700
sp|O15041|SEM3E_HUMAN Semaphorin-3E OS=Homo sapiens OX=9606 GN=SEMA3E PE=1 SV=1	O15041	757	O15041_K757	53.554	LK(0.009)MSPSK(0.995)WK(0.996)YANPQEK(1)K(1)LRSK	3	0.0068716	466947	235599	431096	670188	238334	0	0	0	416700
sp|O15041|SEM3E_HUMAN Semaphorin-3E OS=Homo sapiens OX=9606 GN=SEMA3E PE=1 SV=1	O15041	758	O15041_K758	53.554	LK(0.009)MSPSK(0.995)WK(0.996)YANPQEK(1)K(1)LRSK	3	0.0068716	466947	235599	431096	670188	238334	0	0	0	416700
sp|O15042|SR140_HUMAN U2 snRNP-associated SURP motif-containing protein OS=Homo sapiens OX=9606 GN=U2SURP PE=1 SV=2	O15042	4	O15042_K4	62.466	MADK(1)TPGGSQK(1)ASSK	2	0.54488	1297.25	2094.84	2424.82	0	0	0	0	0	0
sp|O15042|SR140_HUMAN U2 snRNP-associated SURP motif-containing protein OS=Homo sapiens OX=9606 GN=U2SURP PE=1 SV=2	O15042	11	O15042_K11	62.466	MADK(1)TPGGSQK(1)ASSK	2	0.54488	1297.25	2094.84	2424.82	0	0	0	0	0	0
sp|O15347|HMGB3_HUMAN High mobility group protein B3 OS=Homo sapiens OX=9606 GN=HMGB3 PE=1 SV=4	O15347	3	O15347_K3	53.569	AK(1)GDPK(0.894)K(0.106)PK	2	-1.6026	158.287	0	401.781	0	3729.84	0	9039.64	0	20640.7
sp|O15347|HMGB3_HUMAN High mobility group protein B3 OS=Homo sapiens OX=9606 GN=HMGB3 PE=1 SV=4	O15347	7	O15347_K7	53.569	AK(1)GDPK(0.894)K(0.106)PK	2	-1.6026	158.287	0	401.781	0	3729.84	0	9039.64	0	20640.7
sp|O15417|TNC18_HUMAN Trinucleotide repeat-containing gene 18 protein OS=Homo sapiens OX=9606 GN=TNRC18 PE=1 SV=3	O15417	1461	O15417_K1461	50.534	K(1)K(1)EERMYAMK(1)SSLEDMDALELDFR	2	3.1621	0	0	0	0	0	0	0	0	0
sp|O15417|TNC18_HUMAN Trinucleotide repeat-containing gene 18 protein OS=Homo sapiens OX=9606 GN=TNRC18 PE=1 SV=3	O15417	1462	O15417_K1462	50.534	K(1)K(1)EERMYAMK(1)SSLEDMDALELDFR	2	3.1621	0	0	0	0	0	0	0	0	0
sp|O15417|TNC18_HUMAN Trinucleotide repeat-containing gene 18 protein OS=Homo sapiens OX=9606 GN=TNRC18 PE=1 SV=3	O15417	1470	O15417_K1470	50.534	K(1)K(1)EERMYAMK(1)SSLEDMDALELDFR	2	3.1621	0	0	0	0	0	0	0	0	0
sp|O15417|TNC18_HUMAN Trinucleotide repeat-containing gene 18 protein OS=Homo sapiens OX=9606 GN=TNRC18 PE=1 SV=3	O15417	1629	O15417_K1629	40.723	MASDQEQLASK(1)LDK(1)ALSLTK(1)QDK(1)LK	3	0.64671	0	0	0	0	0	0	0	0	0
sp|O15417|TNC18_HUMAN Trinucleotide repeat-containing gene 18 protein OS=Homo sapiens OX=9606 GN=TNRC18 PE=1 SV=3	O15417	1632	O15417_K1632	40.723	MASDQEQLASK(1)LDK(1)ALSLTK(1)QDK(1)LK	3	0.64671	0	0	0	0	0	0	0	0	0
sp|O15417|TNC18_HUMAN Trinucleotide repeat-containing gene 18 protein OS=Homo sapiens OX=9606 GN=TNRC18 PE=1 SV=3	O15417	1638	O15417_K1638	40.723	MASDQEQLASK(1)LDK(1)ALSLTK(1)QDK(1)LK	3	0.64671	0	0	0	0	0	0	0	0	0
sp|O15417|TNC18_HUMAN Trinucleotide repeat-containing gene 18 protein OS=Homo sapiens OX=9606 GN=TNRC18 PE=1 SV=3	O15417	1641	O15417_K1641	40.723	MASDQEQLASK(1)LDK(1)ALSLTK(1)QDK(1)LK	3	0.64671	0	0	0	0	0	0	0	0	0
sp|O43143|DHX15_HUMAN ATP-dependent RNA helicase DHX15 OS=Homo sapiens OX=9606 GN=DHX15 PE=1 SV=2	O43143	17	O43143_K17	133.75	LDLGEDYPSGK(1)K(1)R	2	-0.1724	0	0	0	16239.6	3226.57	6159.91	4316.65	5227.16	3337.54
sp|O43143|DHX15_HUMAN ATP-dependent RNA helicase DHX15 OS=Homo sapiens OX=9606 GN=DHX15 PE=1 SV=2	O43143	18	O43143_K18	133.75	LDLGEDYPSGK(1)K(1)R	2	-0.1724	0	0	0	16239.6	3226.57	6159.91	4316.65	5227.16	3337.54
sp|O43159|RRP8_HUMAN Ribosomal RNA-processing protein 8 OS=Homo sapiens OX=9606 GN=RRP8 PE=1 SV=2	O43159	157	O43159_K157	54.355	HAPINSAQHLDNVDQTGPK(1)AWK	3	-0.13109	0	0	0	9799.47	9316.85	3490.49	0	7390.13	4743.31
sp|O43251|RFOX2_HUMAN RNA binding protein fox-1 homolog 2 OS=Homo sapiens OX=9606 GN=RBFOX2 PE=1 SV=3;sp|Q9NWB1|RFOX1_HUMAN RNA binding protein fox-1 homolog 1 OS=Homo sapiens OX=9606 GN=RBFOX1 PE=1 SV=2	O43251;Q9NWB1	179;175	O43251_K179	73.435	EK(1)LHGTVVEGRK	3	0.46533	5886.71	0	14022	20084.7	12204.7	0	0	11728.3	6513.02
sp|O43290|SNUT1_HUMAN U4/U6.U5 tri-snRNP-associated protein 1 OS=Homo sapiens OX=9606 GN=SART1 PE=1 SV=1	O43290	6	O43290_K6	54.871	GSSK(0.054)K(0.946)HRGEK	3	3.4843	0	0	0	0	0	0	0	0	0
sp|O43293|DAPK3_HUMAN Death-associated protein kinase 3 OS=Homo sapiens OX=9606 GN=DAPK3 PE=1 SV=1	O43293	291	O43293_K291	67.136	NVRGEDSGRK(1)PERR	2	-0.23517	5578.08	0	6872.98	0	4269.1	0	0	0	0
sp|O43295|SRGP3_HUMAN SLIT-ROBO Rho GTPase-activating protein 3 OS=Homo sapiens OX=9606 GN=SRGAP3 PE=1 SV=3	O43295	489	O43295_K489	40.142	PQK(1)MRRPRPLSVYSHK(1)LFNGSMEAFIK	4	-1.0846	3944	0	0	0	0	3127.74	0	0	0
sp|O43295|SRGP3_HUMAN SLIT-ROBO Rho GTPase-activating protein 3 OS=Homo sapiens OX=9606 GN=SRGAP3 PE=1 SV=3	O43295	502	O43295_K502	40.142	PQK(1)MRRPRPLSVYSHK(1)LFNGSMEAFIK	4	-1.0846	3944	0	0	0	0	3127.74	0	0	0
sp|O43303|CP110_HUMAN Centriolar coiled-coil protein of 110 kDa OS=Homo sapiens OX=9606 GN=CCP110 PE=1 SV=3	O43303	695	O43303_K695	47.058	EQERLQKEIEEQEK(0.358)MLK(0.138)EK(0.503)K	3	1.5251	0	0	0	0	873295	0	0	0	0
sp|O43395|PRPF3_HUMAN U4/U6 small nuclear ribonucleoprotein Prp3 OS=Homo sapiens OX=9606 GN=PRPF3 PE=1 SV=2	O43395	92	O43395_K92	78.653	ELK(1)EVFGDDSEISK	2	-0.12223	0	0	0	17228.5	0	0	10402.4	13325.4	12247.9
sp|O43451|MGA_HUMAN Maltase-glucoamylase OS=Homo sapiens OX=9606 GN=MGAM PE=1 SV=6	O43451	4	O43451_K4	46.766	MARK(1)K(1)LK	2	-0.79488	4994.13	6327.69	10381.2	0	0	0	0	0	0
sp|O43451|MGA_HUMAN Maltase-glucoamylase OS=Homo sapiens OX=9606 GN=MGAM PE=1 SV=6	O43451	5	O43451_K5	46.766	MARK(1)K(1)LK	2	-0.79488	4994.13	6327.69	10381.2	0	0	0	0	0	0
sp|O43752|STX6_HUMAN Syntaxin-6 OS=Homo sapiens OX=9606 GN=STX6 PE=1 SV=1	O43752	224	O43752_K224	49.535	LDNVMK(0.004)K(0.035)LAK(0.961)VSHMTSDR	3	-0.088948	0	0	0	0	0	4249.15	0	0	0
sp|O60231|DHX16_HUMAN Pre-mRNA-splicing factor ATP-dependent RNA helicase DHX16 OS=Homo sapiens OX=9606 GN=DHX16 PE=1 SV=2	O60231	1019	O60231_K1019	50.178	AK(1)ELEDPHAK(1)K(1)MPK(1)K(1)IGK(1)TR	3	-3.9715	0	0	0	0	0	0	0	0	0
sp|O60231|DHX16_HUMAN Pre-mRNA-splicing factor ATP-dependent RNA helicase DHX16 OS=Homo sapiens OX=9606 GN=DHX16 PE=1 SV=2	O60231	1027	O60231_K1027	50.178	AK(1)ELEDPHAK(1)K(1)MPK(1)K(1)IGK(1)TR	3	-3.9715	0	0	0	0	0	0	0	0	0
sp|O60231|DHX16_HUMAN Pre-mRNA-splicing factor ATP-dependent RNA helicase DHX16 OS=Homo sapiens OX=9606 GN=DHX16 PE=1 SV=2	O60231	1028	O60231_K1028	50.178	AK(1)ELEDPHAK(1)K(1)MPK(1)K(1)IGK(1)TR	3	-3.9715	0	0	0	0	0	0	0	0	0
sp|O60231|DHX16_HUMAN Pre-mRNA-splicing factor ATP-dependent RNA helicase DHX16 OS=Homo sapiens OX=9606 GN=DHX16 PE=1 SV=2	O60231	1031	O60231_K1031	50.178	AK(1)ELEDPHAK(1)K(1)MPK(1)K(1)IGK(1)TR	3	-3.9715	0	0	0	0	0	0	0	0	0
sp|O60231|DHX16_HUMAN Pre-mRNA-splicing factor ATP-dependent RNA helicase DHX16 OS=Homo sapiens OX=9606 GN=DHX16 PE=1 SV=2	O60231	1032	O60231_K1032	50.178	AK(1)ELEDPHAK(1)K(1)MPK(1)K(1)IGK(1)TR	3	-3.9715	0	0	0	0	0	0	0	0	0
sp|O60231|DHX16_HUMAN Pre-mRNA-splicing factor ATP-dependent RNA helicase DHX16 OS=Homo sapiens OX=9606 GN=DHX16 PE=1 SV=2	O60231	1035	O60231_K1035	50.178	AK(1)ELEDPHAK(1)K(1)MPK(1)K(1)IGK(1)TR	3	-3.9715	0	0	0	0	0	0	0	0	0
sp|O60239|3BP5_HUMAN SH3 domain-binding protein 5 OS=Homo sapiens OX=9606 GN=SH3BP5 PE=1 SV=2	O60239	6	O60239_K6	51.036	MDAALK(1)R	2	-3.3735	0	0	0	0	0	0	0	0	0
sp|O60293|ZC3H1_HUMAN Zinc finger C3H1 domain-containing protein OS=Homo sapiens OX=9606 GN=ZFC3H1 PE=1 SV=3	O60293	930	O60293_K930	50.252	EIGK(1)RK(1)LEQDRFGPNKMMR	3	2.5886	0	0	0	0	0	0	0	0	0
sp|O60293|ZC3H1_HUMAN Zinc finger C3H1 domain-containing protein OS=Homo sapiens OX=9606 GN=ZFC3H1 PE=1 SV=3	O60293	932	O60293_K932	50.252	EIGK(1)RK(1)LEQDRFGPNKMMR	3	2.5886	0	0	0	0	0	0	0	0	0
sp|O60814|H2B1K_HUMAN Histone H2B type 1-K OS=Homo sapiens OX=9606 GN=H2BC12 PE=1 SV=3;sp|P57053|H2BFS_HUMAN Histone H2B type F-S OS=Homo sapiens OX=9606 GN=H2BC12L PE=1 SV=2;sp|P58876|H2B1D_HUMAN Histone H2B type 1-D OS=Homo sapiens OX=9606 GN=H2BC5 PE=1	O60814;P57053;P58876;Q99877;P62807;Q16778;Q93079;Q99880	21;21;21;21;21;21;21;21	O60814_K21	182.41	SAPAPK(1)K(1)GSK(1)K(1)AVTK(1)AQK(1)K	3	-0.022591	0	0	127.494	180776	186870	122211	157704	463447	386992
sp|O60814|H2B1K_HUMAN Histone H2B type 1-K OS=Homo sapiens OX=9606 GN=H2BC12 PE=1 SV=3;sp|P57053|H2BFS_HUMAN Histone H2B type F-S OS=Homo sapiens OX=9606 GN=H2BC12L PE=1 SV=2;sp|P58876|H2B1D_HUMAN Histone H2B type 1-D OS=Homo sapiens OX=9606 GN=H2BC5 PE=1	O60814;P57053;P58876;Q99877;P62807;Q16778;Q93079;Q99880	24;24;24;24;24;24;24;24	O60814_K24	182.41	SAPAPK(1)K(1)GSK(1)K(1)AVTK(1)AQK(1)K	3	-0.022591	0	0	0	152117	166217	122211	157704	436625	358017
sp|O60814|H2B1K_HUMAN Histone H2B type 1-K OS=Homo sapiens OX=9606 GN=H2BC12 PE=1 SV=3;sp|P57053|H2BFS_HUMAN Histone H2B type F-S OS=Homo sapiens OX=9606 GN=H2BC12L PE=1 SV=2;sp|P58876|H2B1D_HUMAN Histone H2B type 1-D OS=Homo sapiens OX=9606 GN=H2BC5 PE=1	O60814;P57053;P58876;Q99877;P62807;Q16778;Q93079;Q99880	25;25;25;25;25;25;25;25	O60814_K25	124.81	AVTK(1)AQK(1)K(1)DGK	2	0.74909	0	0	0	20745.9	61756	53019.4	96766	212738	98999.2
sp|O60814|H2B1K_HUMAN Histone H2B type 1-K OS=Homo sapiens OX=9606 GN=H2BC12 PE=1 SV=3;sp|P57053|H2BFS_HUMAN Histone H2B type F-S OS=Homo sapiens OX=9606 GN=H2BC12L PE=1 SV=2;sp|P58876|H2B1D_HUMAN Histone H2B type 1-D OS=Homo sapiens OX=9606 GN=H2BC5 PE=1	O60814;P57053;P58876;Q99877;Q99879;P62807;Q16778;Q5QNW6;Q93079;Q99880	117;117;117;117;117;117;117;117;117;117	O60814_K117	96.948	HAVSEGTK(1)AVTK	2	-1.6011	0	0	0	0	0	0	0	0	0
sp|O60814|H2B1K_HUMAN Histone H2B type 1-K OS=Homo sapiens OX=9606 GN=H2BC12 PE=1 SV=3;sp|P57053|H2BFS_HUMAN Histone H2B type F-S OS=Homo sapiens OX=9606 GN=H2BC12L PE=1 SV=2;sp|P58876|H2B1D_HUMAN Histone H2B type 1-D OS=Homo sapiens OX=9606 GN=H2BC5 PE=1	O60814;P57053;P58876;Q99877;P62807;Q16778;Q93079;Q99880	17;17;17;17;17;17;17;17	O60814_K17	154.46	SAPAPK(1)K(1)GSK(1)K(1)AVTK(1)AQK(1)K	3	-0.022591	0	0	0	76607.2	85011.2	42928.8	135965	351554	390590
sp|O60814|H2B1K_HUMAN Histone H2B type 1-K OS=Homo sapiens OX=9606 GN=H2BC12 PE=1 SV=3;sp|P57053|H2BFS_HUMAN Histone H2B type F-S OS=Homo sapiens OX=9606 GN=H2BC12L PE=1 SV=2;sp|P62807|H2B1C_HUMAN Histone H2B type 1-C/E/F/G/I OS=Homo sapiens OX=9606 GN=H2B	O60814;P57053;P62807;Q16778	13;13;13;13	O60814_K13	154.46	SAPAPK(1)K(1)GSK(1)K(1)AVTK(1)AQK(1)K	3	-0.022591	0	0	0	28776.8	46380.9	30439.5	135965	285208	306397
sp|O60814|H2B1K_HUMAN Histone H2B type 1-K OS=Homo sapiens OX=9606 GN=H2BC12 PE=1 SV=3;sp|P57053|H2BFS_HUMAN Histone H2B type F-S OS=Homo sapiens OX=9606 GN=H2BC12L PE=1 SV=2;sp|P62807|H2B1C_HUMAN Histone H2B type 1-C/E/F/G/I OS=Homo sapiens OX=9606 GN=H2B	O60814;P57053;P62807;Q16778	16;16;16;16	O60814_K16	154.46	SAPAPK(1)K(1)GSK(1)K(1)AVTK(1)AQK(1)K	3	-0.022591	0	0	0	76607.2	85011.2	42928.8	135965	351554	390590
sp|O60814|H2B1K_HUMAN Histone H2B type 1-K OS=Homo sapiens OX=9606 GN=H2BC12 PE=1 SV=3;sp|P57053|H2BFS_HUMAN Histone H2B type F-S OS=Homo sapiens OX=9606 GN=H2BC12L PE=1 SV=2;sp|P58876|H2B1D_HUMAN Histone H2B type 1-D OS=Homo sapiens OX=9606 GN=H2BC5 PE=1	O60814;P57053;P58876;Q99877;Q99879;P62807;Q16778;Q5QNW6;Q93079;Q99880	109;109;109;109;109;109;109;109;109;109	O60814_K109	80.609	LLLPGELAK(1)HAVSEGTK	3	-1.0524	0	0	2146.91	6070.93	7120.57	0	0	13845.5	5495.07
sp|O60814|H2B1K_HUMAN Histone H2B type 1-K OS=Homo sapiens OX=9606 GN=H2BC12 PE=1 SV=3;sp|P57053|H2BFS_HUMAN Histone H2B type F-S OS=Homo sapiens OX=9606 GN=H2BC12L PE=1 SV=2;sp|P62807|H2B1C_HUMAN Histone H2B type 1-C/E/F/G/I OS=Homo sapiens OX=9606 GN=H2B	O60814;P57053;P62807;Q16778	6;6;6;6	O60814_K6	111.63	PEPAK(1)SAPAPK(1)K(1)GSK	2	-0.88372	0	0	0	13488.3	18133.3	10834	27800.5	19656.5	61194.7
sp|O60814|H2B1K_HUMAN Histone H2B type 1-K OS=Homo sapiens OX=9606 GN=H2BC12 PE=1 SV=3;sp|P57053|H2BFS_HUMAN Histone H2B type F-S OS=Homo sapiens OX=9606 GN=H2BC12L PE=1 SV=2;sp|P62807|H2B1C_HUMAN Histone H2B type 1-C/E/F/G/I OS=Homo sapiens OX=9606 GN=H2B	O60814;P57053;P62807;Q16778	12;12;12;12	O60814_K12	154.46	SAPAPK(1)K(1)GSK(1)K(1)AVTK(1)AQK(1)K	3	-0.022591	0	0	0	27649.8	47871.2	32813.6	140561	291299	303595
sp|O60814|H2B1K_HUMAN Histone H2B type 1-K OS=Homo sapiens OX=9606 GN=H2BC12 PE=1 SV=3;sp|P57053|H2BFS_HUMAN Histone H2B type F-S OS=Homo sapiens OX=9606 GN=H2BC12L PE=1 SV=2;sp|P58876|H2B1D_HUMAN Histone H2B type 1-D OS=Homo sapiens OX=9606 GN=H2BC5 PE=1	O60814;P57053;P58876;Q99877;Q99879;P62807;Q16778;Q5QNW6;Q93079;Q99880	47;47;47;47;47;47;47;47;47;47	O60814_K47	77.726	VLK(1)QVHPDTGISSK	3	-0.074097	1260.9	836.53	1421.12	10345.2	7059.01	9389.61	11098.5	28405.8	21703.9
sp|O60828|PQBP1_HUMAN Polyglutamine-binding protein 1 OS=Homo sapiens OX=9606 GN=PQBP1 PE=1 SV=1	O60828	189	O60828_K189	75.463	EELAPYPK(1)SK(1)K(1)AVSR	2	0.4166	0	0	0	3129.54	4572.93	2558.33	4998.53	11525.9	7863.7
sp|O60828|PQBP1_HUMAN Polyglutamine-binding protein 1 OS=Homo sapiens OX=9606 GN=PQBP1 PE=1 SV=1	O60828	191	O60828_K191	75.463	EELAPYPK(1)SK(1)K(1)AVSR	2	0.4166	0	0	0	3129.54	4572.93	2558.33	4998.53	11525.9	7863.7
sp|O60828|PQBP1_HUMAN Polyglutamine-binding protein 1 OS=Homo sapiens OX=9606 GN=PQBP1 PE=1 SV=1	O60828	192	O60828_K192	75.463	EELAPYPK(1)SK(1)K(1)AVSR	2	0.4166	0	0	0	3129.54	4572.93	2558.33	4998.53	11525.9	7863.7
sp|O60832|DKC1_HUMAN H/ACA ribonucleoprotein complex subunit DKC1 OS=Homo sapiens OX=9606 GN=DKC1 PE=1 SV=3	O60832	11	O60832_K11	100.55	ADAEVIILPK(1)K(1)HK(1)K	2	-0.22536	0	819.291	0	15549.6	15807.4	18096.4	22217.6	32000.5	15756.1
sp|O60832|DKC1_HUMAN H/ACA ribonucleoprotein complex subunit DKC1 OS=Homo sapiens OX=9606 GN=DKC1 PE=1 SV=3	O60832	12	O60832_K12	83.064	ADAEVIILPK(1)K(1)HK(1)K	2	-0.22536	0	0	0	0	3039.2	0	2323.1	3071.86	2522.93
sp|O60832|DKC1_HUMAN H/ACA ribonucleoprotein complex subunit DKC1 OS=Homo sapiens OX=9606 GN=DKC1 PE=1 SV=3	O60832	14	O60832_K14	83.064	ADAEVIILPK(1)K(1)HK(1)K	2	-0.22536	0	0	0	5161.15	9972.03	7342.05	14198.8	13048.8	11330.5
sp|O60832|DKC1_HUMAN H/ACA ribonucleoprotein complex subunit DKC1 OS=Homo sapiens OX=9606 GN=DKC1 PE=1 SV=3	O60832	15	O60832_K15	83.064	ADAEVIILPK(0.773)K(0.235)HK(0.994)K(1)K(0.999)K(0.999)ER	3	0.12971	0	0	0	5161.15	9972.03	7342.05	14198.8	13048.8	11330.5
sp|O60832|DKC1_HUMAN H/ACA ribonucleoprotein complex subunit DKC1 OS=Homo sapiens OX=9606 GN=DKC1 PE=1 SV=3	O60832	16	O60832_K16	83.064	ADAEVIILPK(0.801)K(0.215)HK(0.988)K(0.998)K(0.999)K(0.999)ER	3	0.48758	0	0	0	5161.15	9972.03	7342.05	14198.8	13048.8	11330.5
sp|O60832|DKC1_HUMAN H/ACA ribonucleoprotein complex subunit DKC1 OS=Homo sapiens OX=9606 GN=DKC1 PE=1 SV=3	O60832	17	O60832_K17	83.064	ADAEVIILPK(0.773)K(0.235)HK(0.994)K(1)K(0.999)K(0.999)ER	3	0.12971	0	0	0	5161.15	9972.03	7342.05	14198.8	13048.8	11330.5
sp|O60832|DKC1_HUMAN H/ACA ribonucleoprotein complex subunit DKC1 OS=Homo sapiens OX=9606 GN=DKC1 PE=1 SV=3	O60832	498	O60832_K498	87.24	AGLESGAEPGDGDSDTTK(1)K(1)K	2	-0.039911	0	0	0	0	0	0	0	0	0
sp|O60832|DKC1_HUMAN H/ACA ribonucleoprotein complex subunit DKC1 OS=Homo sapiens OX=9606 GN=DKC1 PE=1 SV=3	O60832	499	O60832_K499	87.24	AGLESGAEPGDGDSDTTK(1)K(1)K	2	-0.039911	0	0	0	0	0	0	0	0	0
sp|O60869|EDF1_HUMAN Endothelial differentiation-related factor 1 OS=Homo sapiens OX=9606 GN=EDF1 PE=1 SV=1	O60869	60	O60869_K60	87.719	NTAK(1)LDRETEELHHDR	2	-1.7301	0	0	0	0	0	0	0	0	0
sp|O60885|BRD4_HUMAN Bromodomain-containing protein 4 OS=Homo sapiens OX=9606 GN=BRD4 PE=1 SV=2	O60885	571	O60885_K571	70.699	AKEPPPK(1)K(1)TK(1)K(1)NNSSNSNVSK	2	0.077841	0	0	0	33089.8	20202.2	28394.3	5925.74	25053.7	0
sp|O60885|BRD4_HUMAN Bromodomain-containing protein 4 OS=Homo sapiens OX=9606 GN=BRD4 PE=1 SV=2	O60885	572	O60885_K572	70.699	AKEPPPK(1)K(1)TK(1)K(1)NNSSNSNVSK	2	0.077841	0	0	0	33089.8	20202.2	28394.3	5925.74	25053.7	0
sp|O60885|BRD4_HUMAN Bromodomain-containing protein 4 OS=Homo sapiens OX=9606 GN=BRD4 PE=1 SV=2	O60885	574	O60885_K574	121.24	TK(1)K(1)NNSSNSNVSK	2	0.22366	0	165.725	166.011	34661.5	21452.8	29072.4	5925.74	25905.3	0
sp|O60885|BRD4_HUMAN Bromodomain-containing protein 4 OS=Homo sapiens OX=9606 GN=BRD4 PE=1 SV=2	O60885	575	O60885_K575	121.24	TK(1)K(1)NNSSNSNVSK	2	0.22366	0	165.725	166.011	34661.5	21452.8	29072.4	5925.74	25905.3	0
sp|O60885|BRD4_HUMAN Bromodomain-containing protein 4 OS=Homo sapiens OX=9606 GN=BRD4 PE=1 SV=2	O60885	535	O60885_K535	134.88	AVHEQLAALSQPQQNK(1)PK(1)K(1)K	3	0.63476	23076.3	39064	22669.2	92769.7	62904.3	50057.1	52900.9	30954.5	0
sp|O60885|BRD4_HUMAN Bromodomain-containing protein 4 OS=Homo sapiens OX=9606 GN=BRD4 PE=1 SV=2	O60885	537	O60885_K537	134.88	AVHEQLAALSQPQQNK(1)PK(1)K(1)K	3	0.63476	67944	74314	73103.9	209322	134243	103580	14256.2	76512.2	39447.5
sp|O60885|BRD4_HUMAN Bromodomain-containing protein 4 OS=Homo sapiens OX=9606 GN=BRD4 PE=1 SV=2	O60885	538	O60885_K538	134.88	AVHEQLAALSQPQQNK(1)PK(1)K(1)K	3	0.63476	67944	74314	73103.9	209322	134243	103580	14256.2	76512.2	39447.5
sp|O60885|BRD4_HUMAN Bromodomain-containing protein 4 OS=Homo sapiens OX=9606 GN=BRD4 PE=1 SV=2	O60885	332	O60885_K332	101.72	ESSRPVKPPK(1)K	3	-0.55402	0	0	0	0	0	0	0	0	0
sp|O75061|AUXI_HUMAN Putative tyrosine-protein phosphatase auxilin OS=Homo sapiens OX=9606 GN=DNAJC6 PE=1 SV=3	O75061	798	O75061_K798	48.547	DK(0.148)K(0.851)GPRTIAEMRKEEMAK	3	0.02415	6011.27	7494.26	8610.14	6229.07	4161.1	4203.36	9748.84	5730.86	5342.87
sp|O75164|KDM4A_HUMAN Lysine-specific demethylase 4A OS=Homo sapiens OX=9606 GN=KDM4A PE=1 SV=2	O75164	323	O75164_K323	55.841	ISMDVFVRK(1)FQPERYK	3	-2.6703	0	0	0	0	0	0	0	0	0
sp|O75190|DNJB6_HUMAN DnaJ homolog subfamily B member 6 OS=Homo sapiens OX=9606 GN=DNAJB6 PE=1 SV=2	O75190	302	O75190_K302	85.805	APGPWDPLASAAGLK(1)EGGK(1)R	2	-1.3062	0	0	0	0	0	0	0	0	0
sp|O75190|DNJB6_HUMAN DnaJ homolog subfamily B member 6 OS=Homo sapiens OX=9606 GN=DNAJB6 PE=1 SV=2	O75190	306	O75190_K306	85.805	APGPWDPLASAAGLK(1)EGGK(1)R	2	-1.3062	0	0	0	0	0	0	0	0	0
sp|O75475|PSIP1_HUMAN PC4 and SFRS1-interacting protein OS=Homo sapiens OX=9606 GN=PSIP1 PE=1 SV=1	O75475	228	O75475_K228	75.55	QPK(0.999)K(0.999)QPK(0.867)K(0.136)DEEGQKEEDKPR	3	0.077058	0	0	0	0	0	0	0	0	0
sp|O75475|PSIP1_HUMAN PC4 and SFRS1-interacting protein OS=Homo sapiens OX=9606 GN=PSIP1 PE=1 SV=1	O75475	229	O75475_K229	75.55	QPK(0.999)K(0.999)QPK(0.867)K(0.136)DEEGQKEEDKPR	3	0.077058	0	0	0	0	0	0	0	0	0
sp|O75475|PSIP1_HUMAN PC4 and SFRS1-interacting protein OS=Homo sapiens OX=9606 GN=PSIP1 PE=1 SV=1	O75475	232	O75475_K232	75.55	QPK(0.999)K(0.999)QPK(0.867)K(0.136)DEEGQKEEDKPR	3	0.077058	0	0	0	0	0	0	0	0	0
sp|O75494|SRS10_HUMAN Serine/arginine-rich splicing factor 10 OS=Homo sapiens OX=9606 GN=SRSF10 PE=1 SV=1	O75494	210	O75494_K210	108.43	GTSK(1)TDSK(1)THYK	2	0.71733	0	0	0	1468.76	681.026	824.333	0	7668.85	10809.9
sp|O75494|SRS10_HUMAN Serine/arginine-rich splicing factor 10 OS=Homo sapiens OX=9606 GN=SRSF10 PE=1 SV=1	O75494	214	O75494_K214	108.43	GTSK(1)TDSK(1)THYK	2	0.71733	0	0	0	1468.76	681.026	824.333	0	7668.85	10809.9
sp|O75496|GEMI_HUMAN Geminin OS=Homo sapiens OX=9606 GN=GMNN PE=1 SV=1	O75496	6	O75496_K6	43.612	NPSMK(0.978)QK(0.14)QEEIK(0.906)ENIK(0.975)NSSVPR	3	0.47536	5505.32	0	12999.3	23396.5	0	40607.4	0	57329.6	0
sp|O75496|GEMI_HUMAN Geminin OS=Homo sapiens OX=9606 GN=GMNN PE=1 SV=1	O75496	13	O75496_K13	43.612	NPSMK(0.978)QK(0.14)QEEIK(0.906)ENIK(0.975)NSSVPR	3	0.47536	5505.32	0	12999.3	23396.5	0	40607.4	0	57329.6	0
sp|O75496|GEMI_HUMAN Geminin OS=Homo sapiens OX=9606 GN=GMNN PE=1 SV=1	O75496	17	O75496_K17	43.612	NPSMK(0.978)QK(0.14)QEEIK(0.906)ENIK(0.975)NSSVPR	3	0.47536	5505.32	0	12999.3	23396.5	0	40607.4	0	57329.6	0
sp|O75533|SF3B1_HUMAN Splicing factor 3B subunit 1 OS=Homo sapiens OX=9606 GN=SF3B1 PE=1 SV=3	O75533	213	O75533_K213	82.55	WDQTADQTPGATPK(1)K	2	-0.35465	0	0	0	0	4307.26	4334.71	2351.47	3527.33	8251.2
sp|O75683|SURF6_HUMAN Surfeit locus protein 6 OS=Homo sapiens OX=9606 GN=SURF6 PE=1 SV=3	O75683	34	O75683_K34	83.692	AGK(1)TQGSETAGPPK	2	-0.77778	0	0	0	0	0	0	0	0	0
sp|O75683|SURF6_HUMAN Surfeit locus protein 6 OS=Homo sapiens OX=9606 GN=SURF6 PE=1 SV=3	O75683	68	O75683_K68	92.943	AK(1)SLGEK(1)SPAASGARR	2	-0.82247	0	0	0	0	0	0	0	7460.65	0
sp|O75683|SURF6_HUMAN Surfeit locus protein 6 OS=Homo sapiens OX=9606 GN=SURF6 PE=1 SV=3	O75683	73	O75683_K73	92.943	AK(1)SLGEK(1)SPAASGARR	2	-0.82247	0	0	0	0	0	0	0	7460.65	0
sp|O75822|EIF3J_HUMAN Eukaryotic translation initiation factor 3 subunit J OS=Homo sapiens OX=9606 GN=EIF3J PE=1 SV=2	O75822	60	O75822_K60	58.268	K(0.999)EEAEVK(0.003)PEVK(0.999)ISEK	3	-1.1734	0	0	0	0	0	0	0	57212	0
sp|O75822|EIF3J_HUMAN Eukaryotic translation initiation factor 3 subunit J OS=Homo sapiens OX=9606 GN=EIF3J PE=1 SV=2	O75822	70	O75822_K70	58.268	K(0.999)EEAEVK(0.003)PEVK(0.999)ISEK	3	-1.1734	0	0	0	0	0	0	0	57212	0
sp|O75937|DNJC8_HUMAN DnaJ homolog subfamily C member 8 OS=Homo sapiens OX=9606 GN=DNAJC8 PE=1 SV=2	O75937	210	O75937_K210	90.906	EWQK(1)NFEESR	2	0.096552	0	0	0	71814.6	69250.9	34841.1	36805.2	117006	61621.3
sp|O75937|DNJC8_HUMAN DnaJ homolog subfamily C member 8 OS=Homo sapiens OX=9606 GN=DNAJC8 PE=1 SV=2	O75937	231	O75937_K231	117.48	NFQANTK(1)GK(1)K(1)EK(1)K(1)NR	2	1.2145	0	0	0	37324.1	34126.9	37142.5	25007.1	53031.3	49951.7
sp|O75937|DNJC8_HUMAN DnaJ homolog subfamily C member 8 OS=Homo sapiens OX=9606 GN=DNAJC8 PE=1 SV=2	O75937	233	O75937_K233	117.48	NFQANTK(1)GK(1)K(1)EK(1)K(1)NR	2	1.2145	0	0	0	37324.1	34126.9	37142.5	25007.1	53031.3	49951.7
sp|O75937|DNJC8_HUMAN DnaJ homolog subfamily C member 8 OS=Homo sapiens OX=9606 GN=DNAJC8 PE=1 SV=2	O75937	234	O75937_K234	117.48	NFQANTK(1)GK(1)K(1)EK(1)K(1)NR	2	1.2145	0	0	0	37324.1	34126.9	37142.5	25007.1	53031.3	49951.7
sp|O75937|DNJC8_HUMAN DnaJ homolog subfamily C member 8 OS=Homo sapiens OX=9606 GN=DNAJC8 PE=1 SV=2	O75937	236	O75937_K236	94.544	NFQANTK(1)GK(1)K(1)EK(1)K(1)NR	2	1.2145	0	0	0	4530.21	0	0	0	9666.02	11867.4
sp|O75937|DNJC8_HUMAN DnaJ homolog subfamily C member 8 OS=Homo sapiens OX=9606 GN=DNAJC8 PE=1 SV=2	O75937	237	O75937_K237	94.544	NFQANTK(1)GK(1)K(1)EK(1)K(1)NR	2	1.2145	0	0	0	4530.21	0	0	0	9666.02	11867.4
sp|O75937|DNJC8_HUMAN DnaJ homolog subfamily C member 8 OS=Homo sapiens OX=9606 GN=DNAJC8 PE=1 SV=2	O75937	201	O75937_K201	127.05	QREEEIEAQEK(1)AK(1)R	2	-0.14823	0	0	0	5456.77	3723	1190.81	2476.94	16887.8	13399.5
sp|O75937|DNJC8_HUMAN DnaJ homolog subfamily C member 8 OS=Homo sapiens OX=9606 GN=DNAJC8 PE=1 SV=2	O75937	203	O75937_K203	127.05	QREEEIEAQEK(1)AK(1)R	2	-0.14823	0	0	0	5456.77	3723	1190.81	2476.94	16887.8	13399.5
sp|O75937|DNJC8_HUMAN DnaJ homolog subfamily C member 8 OS=Homo sapiens OX=9606 GN=DNAJC8 PE=1 SV=2	O75937	246	O75937_K246	94.023	TFLRPPK(1)VK(1)MEQRE	3	-0.17356	0	0	0	47871	48263.6	23932.6	24760.6	61061.2	52371.6
sp|O75937|DNJC8_HUMAN DnaJ homolog subfamily C member 8 OS=Homo sapiens OX=9606 GN=DNAJC8 PE=1 SV=2	O75937	248	O75937_K248	94.023	TFLRPPK(1)VK(1)MEQRE	3	-0.17356	0	0	0	47871	48263.6	23932.6	24760.6	61061.2	52371.6
sp|O75940|SPF30_HUMAN Survival of motor neuron-related-splicing factor 30 OS=Homo sapiens OX=9606 GN=SMNDC1 PE=1 SV=1	O75940	138	O75940_K138	41.86	EDSGNK(1)PMSK(1)K(1)EMIAQQR	2	-0.48337	0	0	0	7703.64	0	0	5973.46	6321.45	16479.8
sp|O75940|SPF30_HUMAN Survival of motor neuron-related-splicing factor 30 OS=Homo sapiens OX=9606 GN=SMNDC1 PE=1 SV=1	O75940	142	O75940_K142	41.86	EDSGNK(1)PMSK(1)K(1)EMIAQQR	2	-0.48337	0	0	0	7703.64	0	0	5973.46	6321.45	16479.8
sp|O75940|SPF30_HUMAN Survival of motor neuron-related-splicing factor 30 OS=Homo sapiens OX=9606 GN=SMNDC1 PE=1 SV=1	O75940	143	O75940_K143	41.86	EDSGNK(1)PMSK(1)K(1)EMIAQQR	2	-0.48337	0	0	0	7703.64	0	0	5973.46	6321.45	16479.8
sp|O75940|SPF30_HUMAN Survival of motor neuron-related-splicing factor 30 OS=Homo sapiens OX=9606 GN=SMNDC1 PE=1 SV=1	O75940	165	O75940_K165	107.11	IK(1)ELEQEREDQK	3	0.14156	0	0	0	17445	18670.4	10869.4	6894.54	19107.5	8776.26
sp|O76021|RL1D1_HUMAN Ribosomal L1 domain-containing protein 1 OS=Homo sapiens OX=9606 GN=RSL1D1 PE=1 SV=3	O76021	448	O76021_K448	120.86	SPSLGK(1)K(1)DAR	2	0.0094509	0	0	0	0	18224.8	0	22376.5	46403.5	40609.7
sp|O76021|RL1D1_HUMAN Ribosomal L1 domain-containing protein 1 OS=Homo sapiens OX=9606 GN=RSL1D1 PE=1 SV=3	O76021	449	O76021_K449	120.86	SPSLGK(1)K(1)DAR	2	0.0094509	0	0	0	0	18224.8	0	22376.5	46403.5	40609.7
sp|O94818|NOL4_HUMAN Nucleolar protein 4 OS=Homo sapiens OX=9606 GN=NOL4 PE=1 SV=2	O94818	522	O94818_K522	42.908	NAAKRMRLERQQDESAPADK(1)QCK	3	-2.2061	0	0	0	6096.43	0	0	0	0	0
sp|O95025|SEM3D_HUMAN Semaphorin-3D OS=Homo sapiens OX=9606 GN=SEMA3D PE=2 SV=2	O95025	757	O95025_K757	43.305	WK(0.026)HMQEMK(0.978)K(0.999)K(0.996)RNRR	2	-0.67091	4392.91	0	0	0	0	0	2186.65	0	0
sp|O95025|SEM3D_HUMAN Semaphorin-3D OS=Homo sapiens OX=9606 GN=SEMA3D PE=2 SV=2	O95025	758	O95025_K758	43.305	WK(0.026)HMQEMK(0.978)K(0.999)K(0.996)RNRR	2	-0.67091	4392.91	0	0	0	0	0	2186.65	0	0
sp|O95025|SEM3D_HUMAN Semaphorin-3D OS=Homo sapiens OX=9606 GN=SEMA3D PE=2 SV=2	O95025	759	O95025_K759	43.305	WK(0.026)HMQEMK(0.978)K(0.999)K(0.996)RNRR	2	-0.67091	4392.91	0	0	0	0	0	2186.65	0	0
sp|O95180|CAC1H_HUMAN Voltage-dependent T-type calcium channel subunit alpha-1H OS=Homo sapiens OX=9606 GN=CACNA1H PE=1 SV=4	O95180	1650	O95180_K1650	40.819	SLDEALK(1)YCNYVFTIVFVFEAALKLVAFGFR	3	1.5657	4113.27	0	0	3810.51	0	0	0	11144.4	0
sp|O95218|ZRAB2_HUMAN Zinc finger Ran-binding domain-containing protein 2 OS=Homo sapiens OX=9606 GN=ZRANB2 PE=1 SV=2	O95218	195	O95218_K195	81.639	YNLDASEEEDSNK(1)K(1)K(1)SNR	2	-1.2356	0	0	0	0	2988.95	0	2645.26	5989.43	10066.4
sp|O95218|ZRAB2_HUMAN Zinc finger Ran-binding domain-containing protein 2 OS=Homo sapiens OX=9606 GN=ZRANB2 PE=1 SV=2	O95218	196	O95218_K196	81.639	YNLDASEEEDSNK(1)K(1)K(1)SNR	2	-1.2356	0	0	0	0	2988.95	0	2645.26	5989.43	10066.4
sp|O95218|ZRAB2_HUMAN Zinc finger Ran-binding domain-containing protein 2 OS=Homo sapiens OX=9606 GN=ZRANB2 PE=1 SV=2	O95218	197	O95218_K197	81.639	YNLDASEEEDSNK(1)K(1)K(1)SNR	2	-1.2356	0	0	0	0	2988.95	0	2645.26	5989.43	10066.4
sp|O95258|UCP5_HUMAN Brain mitochondrial carrier protein 1 OS=Homo sapiens OX=9606 GN=SLC25A14 PE=1 SV=1	O95258	80	O95258_K80	59.542	FK(1)EIK(1)YRGMFHALFR	2	-2.2591	0	0	0	0	0	0	0	3091.8	0
sp|O95258|UCP5_HUMAN Brain mitochondrial carrier protein 1 OS=Homo sapiens OX=9606 GN=SLC25A14 PE=1 SV=1	O95258	83	O95258_K83	59.542	FK(1)EIK(1)YRGMFHALFR	2	-2.2591	0	0	0	0	0	0	0	3091.8	0
sp|O95394|AGM1_HUMAN Phosphoacetylglucosamine mutase OS=Homo sapiens OX=9606 GN=PGM3 PE=1 SV=1	O95394	8	O95394_K8	58.116	DLGAITK(1)YSALHAK	2	-0.99414	0	0	0	0	0	0	0	0	0
sp|O95470|SGPL1_HUMAN Sphingosine-1-phosphate lyase 1 OS=Homo sapiens OX=9606 GN=SGPL1 PE=1 SV=3	O95470	87	O95470_K87	44.132	CFK(0.001)LTRK(0.001)MPIIGRK(0.757)IQDK(0.241)LNK	2	2.4431	1933.98	0	3402.92	3967.04	0	0	0	3305.66	0
sp|O95551|TYDP2_HUMAN Tyrosyl-DNA phosphodiesterase 2 OS=Homo sapiens OX=9606 GN=TDP2 PE=1 SV=1	O95551	242	O95551_K242	53.237	MNQLK(1)MVLK(1)K	2	-3.7553	0	0	0	0	0	0	0	0	0
sp|O95551|TYDP2_HUMAN Tyrosyl-DNA phosphodiesterase 2 OS=Homo sapiens OX=9606 GN=TDP2 PE=1 SV=1	O95551	246	O95551_K246	53.237	MNQLK(1)MVLK(1)K	2	-3.7553	0	0	0	0	0	0	0	0	0
sp|O95613|PCNT_HUMAN Pericentrin OS=Homo sapiens OX=9606 GN=PCNT PE=1 SV=4	O95613	2213	O95613_K2213	47.606	K(1)SPVGMLDLSSWSSPEVLR	2	0.1794	0	0	0	0	0	3256.3	0	0	0
sp|P00813|ADA_HUMAN Adenosine deaminase OS=Homo sapiens OX=9606 GN=ADA PE=1 SV=3	P00813	9	P00813_K9	49.448	AQTPAFDK(1)PK	3	3.2132	0	0	0	316.078	271.989	68.1852	0	0	0
sp|Q93077|H2A1C_HUMAN Histone H2A type 1-C OS=Homo sapiens OX=9606 GN=H2AC6 PE=1 SV=3;sp|Q7L7L0|H2A3_HUMAN Histone H2A type 3 OS=Homo sapiens OX=9606 GN=H2AC25 PE=1 SV=3;sp|P04908|H2A1B_HUMAN Histone H2A type 1-B/E OS=Homo sapiens OX=9606 GN=H2AC8 PE=1 SV=	Q93077;Q7L7L0;P04908;Q99878;Q96KK5;P20671;P0C0S8;Q9BTM1;Q6FI13;Q16777	119;119;119;119;119;119;119;119;119;119	Q93077_K119	131.84	VTIAQGGVLPNIQAVLLPK(1)K	3	0.15489	0	0	0	18507.1	52702.3	28810.7	29832.3	65233.5	49569.6
sp|Q93077|H2A1C_HUMAN Histone H2A type 1-C OS=Homo sapiens OX=9606 GN=H2AC6 PE=1 SV=3;sp|Q7L7L0|H2A3_HUMAN Histone H2A type 3 OS=Homo sapiens OX=9606 GN=H2AC25 PE=1 SV=3;sp|P04908|H2A1B_HUMAN Histone H2A type 1-B/E OS=Homo sapiens OX=9606 GN=H2AC8 PE=1 SV=	Q93077;Q7L7L0;P04908;Q99878;Q96KK5;P20671;P0C0S8;Q9BTM1;Q6FI13;Q16777	120;120;120;120;120;120;120;120;120;120	Q93077_K120	54.869	VTIAQGGVLPNIQAVLLPK(0.5)K(0.5)TESHHK	4	-0.024348	0	0	0	9368.62	0	0	0	0	0
sp|P05114|HMGN1_HUMAN Non-histone chromosomal protein HMG-14 OS=Homo sapiens OX=9606 GN=HMGN1 PE=1 SV=3	P05114	5	P05114_K5	96.113	PK(1)RK(1)VSSAEGAAK(1)EEPK(1)RR	3	-0.30538	0	0	0	15230.1	20710.1	10108.3	1827.15	104060	33073
sp|P05114|HMGN1_HUMAN Non-histone chromosomal protein HMG-14 OS=Homo sapiens OX=9606 GN=HMGN1 PE=1 SV=3	P05114	14	P05114_K14	255.24	VSSAEGAAK(1)EEPK(1)RR	3	0.39407	149.411	0	0	140576	145590	86820.9	189360	340237	233316
sp|P05114|HMGN1_HUMAN Non-histone chromosomal protein HMG-14 OS=Homo sapiens OX=9606 GN=HMGN1 PE=1 SV=3	P05114	18	P05114_K18	139.31	VSSAEGAAK(1)EEPK(1)RR	3	0.39407	0	0	0	5461.29	2648.36	918.047	1448.69	16812.7	18196
sp|P05114|HMGN1_HUMAN Non-histone chromosomal protein HMG-14 OS=Homo sapiens OX=9606 GN=HMGN1 PE=1 SV=3	P05114	27	P05114_K27	86.946	LSAK(1)PPAK(1)VEAK(1)PK(1)K(1)AAAK(1)DK	2	0.063148	0	0	0	174040	179476	132644	182820	610024	571063
sp|P05114|HMGN1_HUMAN Non-histone chromosomal protein HMG-14 OS=Homo sapiens OX=9606 GN=HMGN1 PE=1 SV=3	P05114	31	P05114_K31	153.48	LSAK(1)PPAK(1)VEAK(1)PK(1)K(1)AAAK(1)DK	2	0.063148	574.92	0	926.966	1.53531e+06	1.24538e+06	747666	619366	2.33927e+06	1.74465e+06
sp|P05114|HMGN1_HUMAN Non-histone chromosomal protein HMG-14 OS=Homo sapiens OX=9606 GN=HMGN1 PE=1 SV=3	P05114	35	P05114_K35	135.43	LSAK(1)PPAK(1)VEAK(1)PK(1)K(1)AAAK(1)DK	2	0.063148	0	0	0	85108	108097	145010	78804.1	221330	172589
sp|P05114|HMGN1_HUMAN Non-histone chromosomal protein HMG-14 OS=Homo sapiens OX=9606 GN=HMGN1 PE=1 SV=3	P05114	37	P05114_K37	153.48	LSAK(1)PPAK(1)VEAK(1)PK(1)K(1)AAAK(1)DK	2	0.063148	0	0	0	805703	564245	312872	291187	1.20196e+06	966971
sp|P05114|HMGN1_HUMAN Non-histone chromosomal protein HMG-14 OS=Homo sapiens OX=9606 GN=HMGN1 PE=1 SV=3	P05114	38	P05114_K38	153.48	LSAK(1)PPAK(1)VEAK(1)PK(1)K(1)AAAK(1)DK	2	0.063148	0	0	0	805703	564245	312872	291187	1.20196e+06	966971
sp|P05114|HMGN1_HUMAN Non-histone chromosomal protein HMG-14 OS=Homo sapiens OX=9606 GN=HMGN1 PE=1 SV=3	P05114	42	P05114_K42	118.08	LSAK(1)PPAK(1)VEAK(1)PK(1)K(1)AAAK(1)DK	2	0.063148	0	0	0	115597	146753	79629.3	164013	350991	307667
sp|P05114|HMGN1_HUMAN Non-histone chromosomal protein HMG-14 OS=Homo sapiens OX=9606 GN=HMGN1 PE=1 SV=3	P05114	3	P05114_K3	96.113	PK(1)RK(1)VSSAEGAAK(1)EEPK(1)RR	3	-0.30538	0	0	0	15230.1	20710.1	10108.3	1827.15	104060	33073
sp|P05204|HMGN2_HUMAN Non-histone chromosomal protein HMG-17 OS=Homo sapiens OX=9606 GN=HMGN2 PE=1 SV=3	P05204	5	P05204_K5	114.54	PK(1)RK(1)AEGDAK(1)GDK	2	0.0058702	0	0	0	2519.48	0	916.51	0	28257.6	31853.5
sp|P05204|HMGN2_HUMAN Non-histone chromosomal protein HMG-17 OS=Homo sapiens OX=9606 GN=HMGN2 PE=1 SV=3	P05204	11	P05204_K11	114.54	PK(1)RK(1)AEGDAK(1)GDK	2	0.0058702	0	0	0	2519.48	1822.12	1824.73	4162.73	34244.5	31853.5
sp|P05204|HMGN2_HUMAN Non-histone chromosomal protein HMG-17 OS=Homo sapiens OX=9606 GN=HMGN2 PE=1 SV=3	P05204	14	P05204_K14	102.63	KAEGDAK(1)GDK(1)AK	2	0.53722	0	0	0	0	1822.12	908.219	4162.73	5986.91	0
sp|P05204|HMGN2_HUMAN Non-histone chromosomal protein HMG-17 OS=Homo sapiens OX=9606 GN=HMGN2 PE=1 SV=3	P05204	36	P05204_K36	102.36	PAPPK(1)PEPK(1)PK	2	0.28552	0	0	0	6151.94	4735.28	0	0	19377.4	27222.2
sp|P05204|HMGN2_HUMAN Non-histone chromosomal protein HMG-17 OS=Homo sapiens OX=9606 GN=HMGN2 PE=1 SV=3	P05204	40	P05204_K40	126.5	PAPPK(1)PEPK(1)PK	2	0.28552	231.79	166.862	337.671	940477	960664	568435	1.11567e+06	3.65926e+06	2.79603e+06
sp|P05204|HMGN2_HUMAN Non-histone chromosomal protein HMG-17 OS=Homo sapiens OX=9606 GN=HMGN2 PE=1 SV=3	P05204	42	P05204_K42	87.772	PAPPK(0.004)PEPK(0.996)PK(1)K(1)APAK	3	-0.095476	0	0	0	48887.6	38666.3	26703	42931	168559	133998
sp|P05204|HMGN2_HUMAN Non-histone chromosomal protein HMG-17 OS=Homo sapiens OX=9606 GN=HMGN2 PE=1 SV=3	P05204	43	P05204_K43	87.772	PAPPK(0.004)PEPK(0.996)PK(1)K(1)APAK	3	-0.095476	0	0	0	48887.6	38666.3	26703	42931	168559	133998
sp|P05204|HMGN2_HUMAN Non-histone chromosomal protein HMG-17 OS=Homo sapiens OX=9606 GN=HMGN2 PE=1 SV=3	P05204	47	P05204_K47	55.247	PAPPK(0.046)PEPK(0.824)PK(0.298)K(0.835)APAK(0.998)K(0.999)GEK	4	0.63579	0	0	0	1577	2303.82	0	4595.77	9151.83	17750.2
sp|P05204|HMGN2_HUMAN Non-histone chromosomal protein HMG-17 OS=Homo sapiens OX=9606 GN=HMGN2 PE=1 SV=3	P05204	48	P05204_K48	55.247	PAPPK(0.046)PEPK(0.824)PK(0.298)K(0.835)APAK(0.998)K(0.999)GEK	4	0.63579	0	0	0	1577	2303.82	0	4595.77	9151.83	17750.2
sp|P05204|HMGN2_HUMAN Non-histone chromosomal protein HMG-17 OS=Homo sapiens OX=9606 GN=HMGN2 PE=1 SV=3	P05204	3	P05204_K3	114.54	PK(1)RK(1)AEGDAK(1)GDK	2	0.0058702	0	0	0	2519.48	0	916.51	0	28257.6	31853.5
sp|P05204|HMGN2_HUMAN Non-histone chromosomal protein HMG-17 OS=Homo sapiens OX=9606 GN=HMGN2 PE=1 SV=3	P05204	54	P05204_K54	87.148	VPK(1)GK(1)K(1)GK(1)ADAGK	2	-0.27898	0	0	0	5724	7257	6464.99	21930.8	24971.8	31366.3
sp|P05204|HMGN2_HUMAN Non-histone chromosomal protein HMG-17 OS=Homo sapiens OX=9606 GN=HMGN2 PE=1 SV=3	P05204	56	P05204_K56	87.148	VPK(1)GK(1)K(1)GK(1)ADAGK	2	-0.27898	0	0	0	5724	7257	6464.99	21930.8	24971.8	31366.3
sp|P05204|HMGN2_HUMAN Non-histone chromosomal protein HMG-17 OS=Homo sapiens OX=9606 GN=HMGN2 PE=1 SV=3	P05204	57	P05204_K57	87.148	VPK(1)GK(1)K(1)GK(1)ADAGK	2	-0.27898	0	0	0	5724	7257	6464.99	21930.8	24971.8	31366.3
sp|P05204|HMGN2_HUMAN Non-histone chromosomal protein HMG-17 OS=Homo sapiens OX=9606 GN=HMGN2 PE=1 SV=3	P05204	59	P05204_K59	87.148	VPK(1)GK(1)K(1)GK(1)ADAGK	2	-0.27898	0	0	0	5724	7257	6464.99	21930.8	24971.8	31366.3
sp|P05388|RLA0_HUMAN Large ribosomal subunit protein uL10 OS=Homo sapiens OX=9606 GN=RPLP0 PE=1 SV=1	P05388	50	P05388_K50	46.985	GK(0.807)AVVLMGK(0.191)NTMMRK(0.002)AIR	2	-2.5499	0	0	0	0	0	0	0	0	0
sp|P06748|NPM_HUMAN Nucleophosmin OS=Homo sapiens OX=9606 GN=NPM1 PE=1 SV=2	P06748	193	P06748_K193	94.409	APVK(1)K(1)SIR	2	0.51915	0	0	0	0	107910	12255.5	245111	276817	370180
sp|P06748|NPM_HUMAN Nucleophosmin OS=Homo sapiens OX=9606 GN=NPM1 PE=1 SV=2	P06748	194	P06748_K194	94.409	APVK(1)K(1)SIR	2	0.51915	0	0	0	0	84838.4	0	162087	186298	306047
sp|P06748|NPM_HUMAN Nucleophosmin OS=Homo sapiens OX=9606 GN=NPM1 PE=1 SV=2	P06748	229	P06748_K229	124.04	GQESFK(1)K(1)QEK(1)TPK(1)TPK	2	0.10079	0	0	0	0	3528.06	2095.21	10136.7	33321.9	44943.2
sp|P06748|NPM_HUMAN Nucleophosmin OS=Homo sapiens OX=9606 GN=NPM1 PE=1 SV=2	P06748	230	P06748_K230	169.09	K(1)QEK(1)TPK(1)TPK	1	0.73896	0	0	0	0	3528.06	2095.21	10136.7	33321.9	44943.2
sp|P06748|NPM_HUMAN Nucleophosmin OS=Homo sapiens OX=9606 GN=NPM1 PE=1 SV=2	P06748	233	P06748_K233	246.25	K(1)QEK(1)TPK(1)TPK	1	0.73896	0	0	0	24453.2	26379.6	11754.8	38263.8	193904	217291
sp|P06748|NPM_HUMAN Nucleophosmin OS=Homo sapiens OX=9606 GN=NPM1 PE=1 SV=2	P06748	236	P06748_K236	246.25	TPK(1)TPK(1)GPSSVEDIK	2	-0.61206	0	0	0	24453.2	26379.6	11754.8	38263.8	193904	217291
sp|P06748|NPM_HUMAN Nucleophosmin OS=Homo sapiens OX=9606 GN=NPM1 PE=1 SV=2	P06748	239	P06748_K239	187.75	TPK(1)TPK(1)GPSSVEDIK	2	-0.61206	0	0	0	104133	117551	115257	214059	453247	506331
sp|P07305|H10_HUMAN Histone H1.0 OS=Homo sapiens OX=9606 GN=H1-0 PE=1 SV=3	P07305	14	P07305_K14	110.08	TENSTSAPAAK(0.05)PK(0.95)R	2	1.0173	0	0	0	3109.44	2947.15	2461.17	4905.28	9207.66	10182
sp|P08254|MMP3_HUMAN Stromelysin-1 OS=Homo sapiens OX=9606 GN=MMP3 PE=1 SV=2	P08254	62	P08254_K62	84.615	DSGPVVK(1)K	2	3.3755	0	0	0	0	0	0	424.131	0	319.999
sp|P08579|RU2B_HUMAN U2 small nuclear ribonucleoprotein B'' OS=Homo sapiens OX=9606 GN=SNRPB2 PE=1 SV=1	P08579	103	P08579_K103	56.286	EK(1)K(1)K(1)EK(1)K(1)K(1)AK	2	-0.29906	0	0	0	0	0	0	3444.12	11260.2	10162.3
sp|P08579|RU2B_HUMAN U2 small nuclear ribonucleoprotein B'' OS=Homo sapiens OX=9606 GN=SNRPB2 PE=1 SV=1	P08579	104	P08579_K104	56.286	EK(1)K(1)K(1)EK(1)K(1)K(1)AK	2	-0.29906	0	0	0	0	0	0	3444.12	11260.2	10162.3
sp|P08579|RU2B_HUMAN U2 small nuclear ribonucleoprotein B'' OS=Homo sapiens OX=9606 GN=SNRPB2 PE=1 SV=1	P08579	105	P08579_K105	56.286	EK(1)K(1)K(1)EK(1)K(1)K(1)AK	2	-0.29906	0	0	0	0	0	0	3444.12	11260.2	10162.3
sp|P08579|RU2B_HUMAN U2 small nuclear ribonucleoprotein B'' OS=Homo sapiens OX=9606 GN=SNRPB2 PE=1 SV=1	P08579	107	P08579_K107	56.286	EK(1)K(1)K(1)EK(1)K(1)K(1)AK	2	-0.29906	0	0	0	0	0	0	3444.12	11260.2	10162.3
sp|P08579|RU2B_HUMAN U2 small nuclear ribonucleoprotein B'' OS=Homo sapiens OX=9606 GN=SNRPB2 PE=1 SV=1	P08579	108	P08579_K108	56.286	EK(1)K(1)K(1)EK(1)K(1)K(1)AK	2	-0.29906	0	0	0	0	0	0	3444.12	11260.2	10162.3
sp|P08579|RU2B_HUMAN U2 small nuclear ribonucleoprotein B'' OS=Homo sapiens OX=9606 GN=SNRPB2 PE=1 SV=1	P08579	109	P08579_K109	56.286	EK(1)K(1)K(1)EK(1)K(1)K(1)AK	2	-0.29906	0	0	0	0	0	0	3444.12	11260.2	10162.3
sp|P09429|HMGB1_HUMAN High mobility group protein B1 OS=Homo sapiens OX=9606 GN=HMGB1 PE=1 SV=3	P09429	76	P09429_K76	111.81	EMK(1)TYIPPK(1)GETK(1)K	2	0.22994	0	0	0	65172.7	57612.5	51515	109895	206589	235453
sp|P09429|HMGB1_HUMAN High mobility group protein B1 OS=Homo sapiens OX=9606 GN=HMGB1 PE=1 SV=3	P09429	82	P09429_K82	111.81	EMK(1)TYIPPK(1)GETK(1)K	2	0.22994	0	0	0	46154.1	44501.7	43544.1	103263	184875	203472
sp|P09429|HMGB1_HUMAN High mobility group protein B1 OS=Homo sapiens OX=9606 GN=HMGB1 PE=1 SV=3	P09429	86	P09429_K86	91.317	EMK(1)TYIPPK(1)GETK(1)K	2	0.22994	0	0	0	8688.3	6162.64	3261.47	19012.2	44283.7	60984.5
sp|P09429|HMGB1_HUMAN High mobility group protein B1 OS=Homo sapiens OX=9606 GN=HMGB1 PE=1 SV=3	P09429	87	P09429_K87	44.963	EMK(1)TYIPPK(0.772)GETK(0.488)K(0.74)K	3	-0.469	0	0	0	0	0	0	3560.3	20708	24297.3
sp|P09651|ROA1_HUMAN Heterogeneous nuclear ribonucleoprotein A1 OS=Homo sapiens OX=9606 GN=HNRNPA1 PE=1 SV=5;sp|A0A2R8Y4L2|RA1L3_HUMAN Heterogeneous nuclear ribonucleoprotein A1-like 3 OS=Homo sapiens OX=9606 GN=HNRNPA1L3 PE=4 SV=2	P09651;A0A2R8Y4L2	3;3	P09651_K3	66.289	SK(0.999)SESPK(0.001)EPEQLR	2	-0.97364	0	0	0	0	0	0	0	0	0
sp|P09874|PARP1_HUMAN Poly [ADP-ribose] polymerase 1 OS=Homo sapiens OX=9606 GN=PARP1 PE=1 SV=4	P09874	221	P09874_K221	156	KGDEVDGVDEVAK(1)K(1)K	2	-0.47518	0	0	0	35607.2	33724	19738.7	12657	55281.2	72106.5
sp|P09874|PARP1_HUMAN Poly [ADP-ribose] polymerase 1 OS=Homo sapiens OX=9606 GN=PARP1 PE=1 SV=4	P09874	222	P09874_K222	156	KGDEVDGVDEVAK(1)K(1)K	2	-0.47518	0	0	0	35607.2	33724	19738.7	12657	55281.2	72106.5
sp|P0DME0|SETLP_HUMAN Protein SETSIP OS=Homo sapiens OX=9606 GN=SETSIP PE=1 SV=1	P0DME0	164	P0DME0_K164	57.173	VFSK(1)EFHLNESGDPSSK(1)STK	3	-3.722	0	0	0	0	0	0	0	0	0
sp|P0DME0|SETLP_HUMAN Protein SETSIP OS=Homo sapiens OX=9606 GN=SETSIP PE=1 SV=1	P0DME0	177	P0DME0_K177	57.173	VFSK(1)EFHLNESGDPSSK(1)STK	3	-3.722	0	0	0	0	0	0	0	0	0
sp|P0DMQ5|INAM2_HUMAN Putative transmembrane protein INAFM2 OS=Homo sapiens OX=9606 GN=INAFM2 PE=2 SV=1	P0DMQ5	24	P0DMQ5_K24	70.628	K(0.075)AK(0.923)MAAK(0.001)TNK(1)K	2	0.089359	12816.8	8847.49	13312.5	13230.8	12501.3	11895.5	4696.46	10064.8	7245.36
sp|P0DMQ5|INAM2_HUMAN Putative transmembrane protein INAFM2 OS=Homo sapiens OX=9606 GN=INAFM2 PE=2 SV=1	P0DMQ5	31	P0DMQ5_K31	70.628	K(0.075)AK(0.923)MAAK(0.001)TNK(1)K	2	0.089359	12816.8	8847.49	13312.5	13230.8	12501.3	11895.5	4696.46	10064.8	7245.36
sp|P0DMU9|CT45A_HUMAN Cancer/testis antigen family 45 member A10 OS=Homo sapiens OX=9606 GN=CT45A10 PE=1 SV=1	P0DMU9	117	P0DMU9_K117	59.225	GIASSPK(1)SQQEINADIK	2	0.20386	3189.24	2475.34	2757.3	0	4175.14	3116.66	2085.65	0	5246.4
sp|P0DMU9|CT45A_HUMAN Cancer/testis antigen family 45 member A10 OS=Homo sapiens OX=9606 GN=CT45A10 PE=1 SV=1;sp|Q8NHU0|CT453_HUMAN Cancer/testis antigen family 45 member A3 OS=Homo sapiens OX=9606 GN=CT45A3 PE=1 SV=1;sp|Q5HYN5|CT451_HUMAN Cancer/testis an	P0DMU9;Q8NHU0;Q5HYN5;Q5DJT8;P0DMV2;P0DMV1;P0DMV0;P0DMU8;P0DMU7	17;17;17;17;17;17;17;17;17	P0DMU9_K17	81.625	VAVDPETVFK(1)RPR	3	-1.581	0	0	0	0	0	0	0	9943.06	18966.2
sp|P10412|H14_HUMAN Histone H1.4 OS=Homo sapiens OX=9606 GN=H1-4 PE=1 SV=2	P10412	148	P10412_K148	81.017	ATGAATPK(1)K(1)SAK	2	1.1512	0	0	0	0	0	0	0	0	0
sp|P10412|H14_HUMAN Histone H1.4 OS=Homo sapiens OX=9606 GN=H1-4 PE=1 SV=2	P10412	149	P10412_K149	81.017	ATGAATPK(1)K(1)SAK	2	1.1512	0	0	0	0	0	0	0	0	0
sp|P10412|H14_HUMAN Histone H1.4 OS=Homo sapiens OX=9606 GN=H1-4 PE=1 SV=2	P10412	171	P10412_K171	115.91	KAK(1)SPK(1)K	2	-1.0718	0	0	0	5164.38	0	0	0	13764.1	13886.4
sp|P10412|H14_HUMAN Histone H1.4 OS=Homo sapiens OX=9606 GN=H1-4 PE=1 SV=2	P10412	174	P10412_K174	115.91	KAK(1)SPK(1)K	2	-1.0718	0	0	0	5164.38	0	0	0	13764.1	13886.4
sp|P10412|H14_HUMAN Histone H1.4 OS=Homo sapiens OX=9606 GN=H1-4 PE=1 SV=2	P10412	168	P10412_K168	98.458	PAAAAGAK(1)K	1	0.14834	0	0	0	294.149	150.468	0	0	187.284	461.627
sp|P10809|CH60_HUMAN 60 kDa heat shock protein, mitochondrial OS=Homo sapiens OX=9606 GN=HSPD1 PE=1 SV=2	P10809	359	P10809_K359	43.246	DDAMLLK(1)GK	1	-0.83031	3101.37	3364.59	4589.84	0	4585.53	4282.96	0	0	0
sp|P11055|MYH3_HUMAN Myosin-3 OS=Homo sapiens OX=9606 GN=MYH3 PE=1 SV=3	P11055	636	P11055_K636	98.582	K(0.001)K(0.999)VAK(1)K(1)K	2	1.0682	903.803	0	1415.19	1251.53	0	0	0	2552.67	2778.45
sp|P11055|MYH3_HUMAN Myosin-3 OS=Homo sapiens OX=9606 GN=MYH3 PE=1 SV=3	P11055	639	P11055_K639	98.582	K(0.001)K(0.999)VAK(1)K(1)K	2	1.0682	903.803	0	1415.19	1251.53	0	0	0	2552.67	2778.45
sp|P11055|MYH3_HUMAN Myosin-3 OS=Homo sapiens OX=9606 GN=MYH3 PE=1 SV=3	P11055	640	P11055_K640	98.582	K(0.001)K(0.999)VAK(1)K(1)K	2	1.0682	903.803	0	1415.19	1251.53	0	0	0	2552.67	2778.45
sp|P11387|TOP1_HUMAN DNA topoisomerase 1 OS=Homo sapiens OX=9606 GN=TOP1 PE=1 SV=2	P11387	673	P11387_K673	60.157	ADAK(1)VMK(1)DAK	2	0.61851	0	0	0	0	0	470.901	2878.33	0	0
sp|P11387|TOP1_HUMAN DNA topoisomerase 1 OS=Homo sapiens OX=9606 GN=TOP1 PE=1 SV=2	P11387	676	P11387_K676	60.157	ADAK(1)VMK(1)DAK	2	0.61851	0	0	0	0	0	470.901	2878.33	0	0
sp|P11387|TOP1_HUMAN DNA topoisomerase 1 OS=Homo sapiens OX=9606 GN=TOP1 PE=1 SV=2	P11387	679	P11387_K679	60.157	ADAK(0.994)VMK(0.995)DAK(0.948)TK(0.031)K(0.031)VVESK(0.001)K	2	2.1716	0	0	0	0	0	0	0	0	0
sp|P11387|TOP1_HUMAN DNA topoisomerase 1 OS=Homo sapiens OX=9606 GN=TOP1 PE=1 SV=2	P11387	150	P11387_K150	101.39	DEDDADYK(0.001)PK(0.999)K	3	0.19572	326.293	512.579	297.918	30044.2	27828.5	23445.4	28143.8	25406.7	32952
sp|P11387|TOP1_HUMAN DNA topoisomerase 1 OS=Homo sapiens OX=9606 GN=TOP1 PE=1 SV=2	P11387	151	P11387_K151	101.39	DEDDADYK(0.015)PK(0.989)K(0.996)IK(1)TEDTK	2	-1.659	0	0	0	10850.9	11327.7	10824.7	1115.1	0	12526.5
sp|P11387|TOP1_HUMAN DNA topoisomerase 1 OS=Homo sapiens OX=9606 GN=TOP1 PE=1 SV=2	P11387	153	P11387_K153	70.802	DEDDADYK(0.015)PK(0.989)K(0.996)IK(1)TEDTK	2	-1.659	0	0	0	0	0	0	0	0	0
sp|P11387|TOP1_HUMAN DNA topoisomerase 1 OS=Homo sapiens OX=9606 GN=TOP1 PE=1 SV=2	P11387	174	P11387_K174	130.87	KLEEEEDGKLK(1)K(1)PK(1)NK	3	-0.43298	0	0	0	97384.7	56651.3	38049.8	28454.1	77452.4	55307.3
sp|P11387|TOP1_HUMAN DNA topoisomerase 1 OS=Homo sapiens OX=9606 GN=TOP1 PE=1 SV=2	P11387	175	P11387_K175	130.87	KLEEEEDGKLK(1)K(1)PK(1)NK	2	-0.85214	0	0	0	97384.7	56651.3	38049.8	28454.1	77452.4	55307.3
sp|P11387|TOP1_HUMAN DNA topoisomerase 1 OS=Homo sapiens OX=9606 GN=TOP1 PE=1 SV=2	P11387	177	P11387_K177	130.87	LEEEEDGK(0.017)LK(0.984)K(0.999)PK(1)NK	2	-0.17493	0	0	0	89623	54045	35854.6	28454.1	77452.4	55307.3
sp|P11387|TOP1_HUMAN DNA topoisomerase 1 OS=Homo sapiens OX=9606 GN=TOP1 PE=1 SV=2	P11387	48	P11387_K48	100.58	SK(1)HSNSEHK(1)DSEK	2	-0.10427	0	0	0	540.062	190.2	0	632.981	343.251	331.462
sp|P11387|TOP1_HUMAN DNA topoisomerase 1 OS=Homo sapiens OX=9606 GN=TOP1 PE=1 SV=2	P11387	55	P11387_K55	100.58	SK(1)HSNSEHK(1)DSEK	2	-0.10427	0	0	0	540.062	190.2	0	632.981	343.251	331.462
sp|P11388|TOP2A_HUMAN DNA topoisomerase 2-alpha OS=Homo sapiens OX=9606 GN=TOP2A PE=1 SV=3	P11388	1422	P11388_K1422	98.654	TAAK(1)SQSSTSTTGAK	2	0.35341	0	0	0	720.502	0	532.477	1257.03	1126.11	984.833
sp|P12036|NFH_HUMAN Neurofilament heavy polypeptide OS=Homo sapiens OX=9606 GN=NEFH PE=1 SV=4	P12036	729	P12036_K729	52.101	AK(0.999)SPVK(0.001)EEAKTPEKAKSPVK	2	-0.83543	2117.06	2587.82	1690.43	0	0	2761.83	0	0	0
sp|P12956|XRCC6_HUMAN X-ray repair cross-complementing protein 6 OS=Homo sapiens OX=9606 GN=XRCC6 PE=1 SV=2	P12956	556	P12956_K556	146.11	RPK(1)VEYSEEELK	3	-1.2475	0	0	0	16654.6	13498.1	6014.12	4957.38	30792.5	27499.6
sp|P13639|EF2_HUMAN Elongation factor 2 OS=Homo sapiens OX=9606 GN=EEF2 PE=1 SV=4	P13639	629	P13639_K629	75.229	GEVSARQELK(1)QRAR	2	1.1059	0	0	0	0	0	0	0	0	0
sp|P14625|ENPL_HUMAN Endoplasmin OS=Homo sapiens OX=9606 GN=HSP90B1 PE=1 SV=1;sp|Q58FF3|ENPLL_HUMAN Putative endoplasmin-like protein OS=Homo sapiens OX=9606 GN=HSP90B2P PE=5 SV=1	P14625;Q58FF3	663;302	P14625_K663	92.112	IMK(1)AQAYQTGK	2	-0.28702	17551	15620.4	24445	42997.7	0	33546.7	18066.6	0	0
sp|P14859|PO2F1_HUMAN POU domain, class 2, transcription factor 1 OS=Homo sapiens OX=9606 GN=POU2F1 PE=1 SV=2	P14859	272	P14859_K272	62.891	TIAATPIQTLPQSQSTPK(1)R	2	1.4855	0	0	0	0	0	0	0	0	0
sp|P14866|HNRPL_HUMAN Heterogeneous nuclear ribonucleoprotein L OS=Homo sapiens OX=9606 GN=HNRNPL PE=1 SV=2	P14866	418	P14866_K418	80.238	SK(1)PGAAMVEMADGYAVDR	3	-0.58688	32419.6	24272.5	48605	72627.9	46776.9	0	26248.2	41991.9	31398.5
sp|P15924|DESP_HUMAN Desmoplakin OS=Homo sapiens OX=9606 GN=DSP PE=1 SV=3	P15924	2704	P15924_K2704	57.532	GK(1)K(1)K(1)MSAAEAVK(1)EK	2	2.2777	0	0	0	0	0	0	0	0	0
sp|P15924|DESP_HUMAN Desmoplakin OS=Homo sapiens OX=9606 GN=DSP PE=1 SV=3	P15924	2705	P15924_K2705	57.532	GK(1)K(1)K(1)MSAAEAVK(1)EK	2	2.2777	0	0	0	0	0	0	0	0	0
sp|P15924|DESP_HUMAN Desmoplakin OS=Homo sapiens OX=9606 GN=DSP PE=1 SV=3	P15924	2706	P15924_K2706	57.532	GK(1)K(1)K(1)MSAAEAVK(1)EK	2	2.2777	0	0	0	0	0	0	0	0	0
sp|P15924|DESP_HUMAN Desmoplakin OS=Homo sapiens OX=9606 GN=DSP PE=1 SV=3	P15924	2714	P15924_K2714	57.532	GK(1)K(1)K(1)MSAAEAVK(1)EK	2	2.2777	0	0	0	0	0	0	0	0	0
sp|P16104|H2AX_HUMAN Histone H2AX OS=Homo sapiens OX=9606 GN=H2AX PE=1 SV=2	P16104	135	P16104_K135	89.992	APSGGK(0.001)K(0.999)ATQASQEY	2	-0.31788	35401	18837.9	48619.3	52237.6	37780.8	61706.2	0	37702.4	41625.4
sp|P16104|H2AX_HUMAN Histone H2AX OS=Homo sapiens OX=9606 GN=H2AX PE=1 SV=2	P16104	128	P16104_K128	115.68	TSATVGPK(1)APSGGK	2	0.57099	0	0	0	4749.99	5110.03	2477.1	3418.9	0	15286.4
sp|P17096|HMGA1_HUMAN High mobility group protein HMG-I/HMG-Y OS=Homo sapiens OX=9606 GN=HMGA1 PE=1 SV=3	P17096	55	P17096_K55	198.61	EPSEVPTPK(1)RPR	2	0.12937	450.699	586.495	814.63	727537	654350	527120	488296	1.49033e+06	1.03597e+06
sp|P17096|HMGA1_HUMAN High mobility group protein HMG-I/HMG-Y OS=Homo sapiens OX=9606 GN=HMGA1 PE=1 SV=3	P17096	62	P17096_K62	55.02	GRPK(1)GSK(1)NK(1)GAAK(1)TR	2	-0.44955	0	0	0	0	11354.7	2454.09	0	57560.4	56654.2
sp|P17096|HMGA1_HUMAN High mobility group protein HMG-I/HMG-Y OS=Homo sapiens OX=9606 GN=HMGA1 PE=1 SV=3	P17096	65	P17096_K65	55.02	GRPK(1)GSK(1)NK(1)GAAK(1)TR	2	-0.44955	0	0	0	0	11354.7	2454.09	0	57560.4	56654.2
sp|P17096|HMGA1_HUMAN High mobility group protein HMG-I/HMG-Y OS=Homo sapiens OX=9606 GN=HMGA1 PE=1 SV=3	P17096	67	P17096_K67	55.02	GRPK(1)GSK(1)NK(1)GAAK(1)TR	2	-0.44955	0	0	0	0	11354.7	2454.09	0	57560.4	56654.2
sp|P17096|HMGA1_HUMAN High mobility group protein HMG-I/HMG-Y OS=Homo sapiens OX=9606 GN=HMGA1 PE=1 SV=3	P17096	71	P17096_K71	55.02	GRPK(1)GSK(1)NK(1)GAAK(1)TR	2	-0.44955	0	0	0	0	11354.7	2454.09	0	57560.4	56654.2
sp|P17096|HMGA1_HUMAN High mobility group protein HMG-I/HMG-Y OS=Homo sapiens OX=9606 GN=HMGA1 PE=1 SV=3	P17096	88	P17096_K88	125.52	GRPK(0.972)K(0.781)LEK(0.248)EEEEGISQESSEEEQ	2	-1.3459	0	0	0	7041.07	3764.4	0	0	9470.84	8891.52
sp|P17096|HMGA1_HUMAN High mobility group protein HMG-I/HMG-Y OS=Homo sapiens OX=9606 GN=HMGA1 PE=1 SV=3	P17096	89	P17096_K89	125.52	GRPK(0.972)K(0.781)LEK(0.248)EEEEGISQESSEEEQ	2	-1.3459	0	0	0	7041.07	3764.4	0	0	9470.84	8891.52
sp|P17096|HMGA1_HUMAN High mobility group protein HMG-I/HMG-Y OS=Homo sapiens OX=9606 GN=HMGA1 PE=1 SV=3	P17096	46	P17096_K46	57.152	KQPPVSPGTALVGSQK(0.833)EPSEVPTPK(0.167)RPR	3	0.25024	0	0	0	6800.96	0	0	0	7971.49	8270.95
sp|P17096|HMGA1_HUMAN High mobility group protein HMG-I/HMG-Y OS=Homo sapiens OX=9606 GN=HMGA1 PE=1 SV=3	P17096	7	P17096_K7	187.63	SESSSK(1)SSQPLASK(1)QEK	2	0.58202	0	0	0	76132.8	93006.5	77207.3	380554	335322	270382
sp|P17096|HMGA1_HUMAN High mobility group protein HMG-I/HMG-Y OS=Homo sapiens OX=9606 GN=HMGA1 PE=1 SV=3	P17096	15	P17096_K15	148.85	SESSSK(1)SSQPLASK(1)QEK	2	0.58202	0	0	0	2166.73	4016.39	0	17672.6	19430.3	22805.3
sp|P17482|HXB9_HUMAN Homeobox protein Hox-B9 OS=Homo sapiens OX=9606 GN=HOXB9 PE=1 SV=2	P17482	239	P17482_K239	46.892	IWFQNRRMK(0.762)MK(0.41)K(0.862)MNK(0.966)EQGK	3	-3.7917	0	0	0	0	0	0	0	0	0
sp|P17482|HXB9_HUMAN Homeobox protein Hox-B9 OS=Homo sapiens OX=9606 GN=HOXB9 PE=1 SV=2	P17482	242	P17482_K242	46.892	IWFQNRRMK(0.762)MK(0.41)K(0.862)MNK(0.966)EQGK	3	-3.7917	0	0	0	0	0	0	0	0	0
sp|P17482|HXB9_HUMAN Homeobox protein Hox-B9 OS=Homo sapiens OX=9606 GN=HOXB9 PE=1 SV=2	P17482	245	P17482_K245	46.892	IWFQNRRMK(0.762)MK(0.41)K(0.862)MNK(0.966)EQGK	3	-3.7917	0	0	0	0	0	0	0	0	0
sp|P19338|NUCL_HUMAN Nucleolin OS=Homo sapiens OX=9606 GN=NCL PE=1 SV=3	P19338	87	P19338_K87	100.4	AAVTPGK(1)K(1)AAATPAK	2	-0.17609	0	0	0	10842.5	0	1126.67	11622.1	35262.4	32028.6
sp|P19338|NUCL_HUMAN Nucleolin OS=Homo sapiens OX=9606 GN=NCL PE=1 SV=3	P19338	88	P19338_K88	100.4	AAVTPGK(1)K(1)AAATPAK	2	-0.17609	0	0	0	10842.5	0	1126.67	11622.1	35262.4	32028.6
sp|P19338|NUCL_HUMAN Nucleolin OS=Homo sapiens OX=9606 GN=NCL PE=1 SV=3	P19338	3	P19338_K3	80.102	VK(1)LAK(1)AGK	1	-0.15841	0	0	0	123975	0	0	0	193698	244050
sp|P19338|NUCL_HUMAN Nucleolin OS=Homo sapiens OX=9606 GN=NCL PE=1 SV=3	P19338	6	P19338_K6	80.102	VK(1)LAK(1)AGK	1	-0.15841	0	0	0	123975	0	0	0	193698	244050
sp|P19793|RXRA_HUMAN Retinoic acid receptor RXR-alpha OS=Homo sapiens OX=9606 GN=RXRA PE=1 SV=1;sp|P48443|RXRG_HUMAN Retinoic acid receptor RXR-gamma OS=Homo sapiens OX=9606 GN=RXRG PE=1 SV=1;sp|P28702|RXRB_HUMAN Retinoic acid receptor RXR-beta OS=Homo sap	P19793;P48443;P28702	284;285;355	P19793_K284	64.654	QLFTLVEWAK(1)R	2	-1.8173	0	0	0	6505.66	0	0	0	0	0
sp|P20592|MX2_HUMAN Interferon-induced GTP-binding protein Mx2 OS=Homo sapiens OX=9606 GN=MX2 PE=1 SV=1	P20592	3	P20592_K3	46.063	SK(0.931)AHK(0.069)PWPYRR	3	2.4689	0	0	0	0	0	0	0	0	0
sp|P20810|ICAL_HUMAN Calpastatin OS=Homo sapiens OX=9606 GN=CAST PE=1 SV=4	P20810	277	P20810_K277	76.1	SAAPPQEK(1)K	2	-0.73915	0	123.573	0	5151.79	6772.1	0	0	39572.9	0
sp|P20929|NEBU_HUMAN Nebulin OS=Homo sapiens OX=9606 GN=NEB PE=1 SV=5	P20929	625	P20929_K625	55.186	NK(0.002)GK(0.002)MIGVLSINDDPK(0.007)MLHSLK(0.989)VAK	2	-2.2455	0	0	0	0	0	0	0	0	0
sp|P20962|PTMS_HUMAN Parathymosin OS=Homo sapiens OX=9606 GN=PTMS PE=1 SV=2	P20962	4	P20962_K4	43.305	MSEK(0.999)SVEAAAELSAK(0.106)DLK(0.414)EK(0.414)K(0.067)EK	2	-3.6399	0	0	0	0	0	0	0	0	0
sp|P20962|PTMS_HUMAN Parathymosin OS=Homo sapiens OX=9606 GN=PTMS PE=1 SV=2	P20962	18	P20962_K18	43.305	MSEK(0.999)SVEAAAELSAK(0.106)DLK(0.414)EK(0.414)K(0.067)EK	2	-3.6399	0	0	0	0	0	0	0	0	0
sp|P20962|PTMS_HUMAN Parathymosin OS=Homo sapiens OX=9606 GN=PTMS PE=1 SV=2	P20962	20	P20962_K20	43.305	MSEK(0.999)SVEAAAELSAK(0.106)DLK(0.414)EK(0.414)K(0.067)EK	2	-3.6399	0	0	0	0	0	0	0	0	0
sp|Q8N9I0|SYT2_HUMAN Synaptotagmin-2 OS=Homo sapiens OX=9606 GN=SYT2 PE=1 SV=2;sp|P21579|SYT1_HUMAN Synaptotagmin-1 OS=Homo sapiens OX=9606 GN=SYT1 PE=1 SV=1	Q8N9I0;P21579	299;302	Q8N9I0_K299	49.593	K(1)MDVGGLSDPYVK(0.999)IHLMQNGK(0.318)RLK(0.341)K(0.341)K	3	4.181	0	0	0	0	0	0	0	0	0
sp|Q8N9I0|SYT2_HUMAN Synaptotagmin-2 OS=Homo sapiens OX=9606 GN=SYT2 PE=1 SV=2;sp|P21579|SYT1_HUMAN Synaptotagmin-1 OS=Homo sapiens OX=9606 GN=SYT1 PE=1 SV=1	Q8N9I0;P21579	311;314	Q8N9I0_K311	49.593	K(1)MDVGGLSDPYVK(0.999)IHLMQNGK(0.318)RLK(0.341)K(0.341)K	3	4.181	0	0	0	0	0	0	0	0	0
sp|Q8N9I0|SYT2_HUMAN Synaptotagmin-2 OS=Homo sapiens OX=9606 GN=SYT2 PE=1 SV=2;sp|P21579|SYT1_HUMAN Synaptotagmin-1 OS=Homo sapiens OX=9606 GN=SYT1 PE=1 SV=1	Q8N9I0;P21579	322;325	Q8N9I0_K322	49.593	K(1)MDVGGLSDPYVK(0.999)IHLMQNGK(0.318)RLK(0.341)K(0.341)K	3	4.181	0	0	0	0	0	0	0	0	0
sp|Q8N9I0|SYT2_HUMAN Synaptotagmin-2 OS=Homo sapiens OX=9606 GN=SYT2 PE=1 SV=2;sp|P21579|SYT1_HUMAN Synaptotagmin-1 OS=Homo sapiens OX=9606 GN=SYT1 PE=1 SV=1	Q8N9I0;P21579	323;326	Q8N9I0_K323	49.593	K(1)MDVGGLSDPYVK(0.999)IHLMQNGK(0.318)RLK(0.341)K(0.341)K	3	4.181	0	0	0	0	0	0	0	0	0
sp|P22314|UBA1_HUMAN Ubiquitin-like modifier-activating enzyme 1 OS=Homo sapiens OX=9606 GN=UBA1 PE=1 SV=3	P22314	8	P22314_K8	49.3	MSSSPLSK(0.833)K(0.167)RR	3	0.80407	0	0	0	0	0	0	0	0	0
sp|P23511|NFYA_HUMAN Nuclear transcription factor Y subunit alpha OS=Homo sapiens OX=9606 GN=NFYA PE=1 SV=2	P23511	322	P23511_K322	93.649	FFSPK(1)EK	1	0.33959	0	0	0	0	0	3923.38	3332.97	0	1184.57
sp|P23511|NFYA_HUMAN Nuclear transcription factor Y subunit alpha OS=Homo sapiens OX=9606 GN=NFYA PE=1 SV=2	P23511	270	P23511_K270	139.11	IPLPGAEMLEEEPLYVNAK(1)QYHR	3	-0.32971	0	0	0	36778.7	21727.1	16736.3	39054.9	54664.2	54259.8
sp|P23588|IF4B_HUMAN Eukaryotic translation initiation factor 4B OS=Homo sapiens OX=9606 GN=EIF4B PE=1 SV=2	P23588	343	P23588_K343	88.992	STPK(1)EDDSSASTSQSTR	2	-0.8184	0	0	0	0	0	0	665.157	779.561	0
sp|P25440|BRD2_HUMAN Bromodomain-containing protein 2 OS=Homo sapiens OX=9606 GN=BRD2 PE=1 SV=2	P25440	544	P25440_K544	98.165	AVHEQLAALSQGPISK(0.56)PK(0.44)R	4	0.14394	0	0	0	0	0	0	0	0	0
sp|P25440|BRD2_HUMAN Bromodomain-containing protein 2 OS=Homo sapiens OX=9606 GN=BRD2 PE=1 SV=2	P25440	546	P25440_K546	137.73	AVHEQLAALSQGPISK(0.027)PK(0.973)R	4	-0.4448	3056.14	874.995	4526.64	50559.4	18255.7	7782.67	4096.97	0	16316.8
sp|P25440|BRD2_HUMAN Bromodomain-containing protein 2 OS=Homo sapiens OX=9606 GN=BRD2 PE=1 SV=2	P25440	551	P25440_K551	74.392	EK(1)K(1)EK(1)K(1)K(1)K(1)R	2	-0.66136	15491.1	10688.7	16377.6	0	14935.9	25745.4	7948.7	18625.2	15801
sp|P25440|BRD2_HUMAN Bromodomain-containing protein 2 OS=Homo sapiens OX=9606 GN=BRD2 PE=1 SV=2	P25440	552	P25440_K552	74.392	EK(1)K(1)EK(1)K(1)K(1)K(1)R	2	-0.66136	15491.1	10688.7	16377.6	0	14935.9	25745.4	7948.7	18625.2	15801
sp|P25440|BRD2_HUMAN Bromodomain-containing protein 2 OS=Homo sapiens OX=9606 GN=BRD2 PE=1 SV=2	P25440	554	P25440_K554	74.392	EK(1)K(1)EK(1)K(1)K(1)K(1)R	2	-0.66136	15491.1	10688.7	16377.6	0	14935.9	25745.4	7948.7	18625.2	15801
sp|P25440|BRD2_HUMAN Bromodomain-containing protein 2 OS=Homo sapiens OX=9606 GN=BRD2 PE=1 SV=2	P25440	555	P25440_K555	74.392	EK(1)K(1)EK(1)K(1)K(1)K(1)R	2	-0.66136	15491.1	10688.7	16377.6	0	14935.9	25745.4	7948.7	18625.2	15801
sp|P25440|BRD2_HUMAN Bromodomain-containing protein 2 OS=Homo sapiens OX=9606 GN=BRD2 PE=1 SV=2	P25440	556	P25440_K556	74.392	EK(1)K(1)EK(1)K(1)K(1)K(1)R	2	-0.66136	15491.1	10688.7	16377.6	0	14935.9	25745.4	7948.7	18625.2	15801
sp|P25440|BRD2_HUMAN Bromodomain-containing protein 2 OS=Homo sapiens OX=9606 GN=BRD2 PE=1 SV=2	P25440	557	P25440_K557	74.392	EK(1)K(1)EK(1)K(1)K(1)K(1)R	2	-0.66136	15491.1	10688.7	16377.6	0	14935.9	25745.4	7948.7	18625.2	15801
sp|P35221|CTNA1_HUMAN Catenin alpha-1 OS=Homo sapiens OX=9606 GN=CTNNA1 PE=1 SV=1;sp|P26232|CTNA2_HUMAN Catenin alpha-2 OS=Homo sapiens OX=9606 GN=CTNNA2 PE=1 SV=5	P35221;P26232	733;732	P35221_K733	47.204	QMCMIMMEMTDFTRGK(1)GPLK	2	1.5473	0	0	0	0	0	0	0	0	0
sp|P26368|U2AF2_HUMAN Splicing factor U2AF 65 kDa subunit OS=Homo sapiens OX=9606 GN=U2AF2 PE=1 SV=4	P26368	70	P26368_K70	117.95	GAK(1)EEHGGLIR	2	0.065866	0	1000.47	956.175	91365.8	44400.9	61748.1	0	79769.5	92500.5
sp|P26583|HMGB2_HUMAN High mobility group protein B2 OS=Homo sapiens OX=9606 GN=HMGB2 PE=1 SV=2	P26583	76	P26583_K76	61.524	YDREMK(1)NYVPPK(1)GDK	2	-0.042639	0	0	0	2690.95	0	0	0	6977.94	13175.7
sp|P26583|HMGB2_HUMAN High mobility group protein B2 OS=Homo sapiens OX=9606 GN=HMGB2 PE=1 SV=2	P26583	82	P26583_K82	61.524	YDREMK(1)NYVPPK(1)GDK	2	-0.042639	0	0	0	2690.95	0	0	0	6977.94	13175.7
sp|P26641|EF1G_HUMAN Elongation factor 1-gamma OS=Homo sapiens OX=9606 GN=EEF1G PE=1 SV=3	P26641	227	P26641_K227	142.98	FAETQPK(1)K	2	0.61999	0	0	0	5385.77	6072.64	0	6988.66	20219	22275.1
sp|P26641|EF1G_HUMAN Elongation factor 1-gamma OS=Homo sapiens OX=9606 GN=EEF1G PE=1 SV=3	P26641	228	P26641_K228	92.866	KFAETQPK(0.5)K(0.5)DTPR	2	-1.7892	0	0	0	0	0	0	0	0	0
sp|P27695|APEX1_HUMAN DNA-(apurinic or apyrimidinic site) endonuclease OS=Homo sapiens OX=9606 GN=APEX1 PE=1 SV=2	P27695	24	P27695_K24	115.34	TEPEAK(1)K(1)SK(1)TAAK	2	0.14189	0	0	0	21062.9	22422.2	3611.73	0	24824.5	22528.3
sp|P27695|APEX1_HUMAN DNA-(apurinic or apyrimidinic site) endonuclease OS=Homo sapiens OX=9606 GN=APEX1 PE=1 SV=2	P27695	25	P27695_K25	84.62	TEPEAK(1)K(1)SK(1)TAAK	2	0.14189	0	0	0	21062.9	22422.2	3611.73	0	24824.5	22528.3
sp|P27695|APEX1_HUMAN DNA-(apurinic or apyrimidinic site) endonuclease OS=Homo sapiens OX=9606 GN=APEX1 PE=1 SV=2	P27695	27	P27695_K27	84.62	TEPEAK(1)K(1)SK(1)TAAK	2	0.14189	0	0	0	21062.9	22422.2	3611.73	0	24824.5	22528.3
sp|P27695|APEX1_HUMAN DNA-(apurinic or apyrimidinic site) endonuclease OS=Homo sapiens OX=9606 GN=APEX1 PE=1 SV=2	P27695	6	P27695_K6	136.83	GK(1)K(1)GAVAEDGDELR	2	0.21532	0	0	0	19439.8	17578.9	23087.2	20769	37550.1	41950.1
sp|P27695|APEX1_HUMAN DNA-(apurinic or apyrimidinic site) endonuclease OS=Homo sapiens OX=9606 GN=APEX1 PE=1 SV=2	P27695	7	P27695_K7	136.83	GK(1)K(1)GAVAEDGDELR	2	0.21532	0	0	0	19439.8	17578.9	23087.2	20769	37550.1	41950.1
sp|P28356|HXD9_HUMAN Homeobox protein Hox-D9 OS=Homo sapiens OX=9606 GN=HOXD9 PE=1 SV=5	P28356	339	P28356_K339	59.153	RMK(0.986)MK(0.01)K(0.004)MSK(0.001)EK	2	-0.61568	2459.2	0	0	0	5509.98	6769.14	0	0	0
sp|P28356|HXD9_HUMAN Homeobox protein Hox-D9 OS=Homo sapiens OX=9606 GN=HOXD9 PE=1 SV=5	P28356	341	P28356_K341	45.158	MK(0.009)MK(0.513)K(0.512)MSK(0.969)EK(0.997)CPK	2	-3.7697	2208.23	1422.09	0	0	0	0	0	0	0
sp|P28356|HXD9_HUMAN Homeobox protein Hox-D9 OS=Homo sapiens OX=9606 GN=HOXD9 PE=1 SV=5	P28356	342	P28356_K342	45.158	MK(0.009)MK(0.513)K(0.512)MSK(0.969)EK(0.997)CPK	2	-3.7697	2208.23	1422.09	0	0	0	0	0	0	0
sp|P28356|HXD9_HUMAN Homeobox protein Hox-D9 OS=Homo sapiens OX=9606 GN=HOXD9 PE=1 SV=5	P28356	345	P28356_K345	45.158	MK(0.009)MK(0.513)K(0.512)MSK(0.969)EK(0.997)CPK	2	-3.7697	2208.23	1422.09	0	0	0	0	0	0	0
sp|P28356|HXD9_HUMAN Homeobox protein Hox-D9 OS=Homo sapiens OX=9606 GN=HOXD9 PE=1 SV=5	P28356	347	P28356_K347	46.121	MK(0.009)MK(0.513)K(0.512)MSK(0.969)EK(0.997)CPK	2	-3.7697	2208.23	1422.09	0	0	0	0	0	0	0
sp|P29084|T2EB_HUMAN Transcription initiation factor IIE subunit beta OS=Homo sapiens OX=9606 GN=GTF2E2 PE=1 SV=1	P29084	251	P29084_K251	79.885	QGISSMQESGPK(1)K	2	0.21406	0	0	0	2729.55	1957.69	1434.59	2771.25	0	0
sp|P29374|ARI4A_HUMAN AT-rich interactive domain-containing protein 4A OS=Homo sapiens OX=9606 GN=ARID4A PE=1 SV=3	P29374	528	P29374_K528	99.53	QK(1)EK(1)K(1)IK(1)K	2	-1.3494	0	0	0	0	0	0	0	986.876	0
sp|P29374|ARI4A_HUMAN AT-rich interactive domain-containing protein 4A OS=Homo sapiens OX=9606 GN=ARID4A PE=1 SV=3	P29374	530	P29374_K530	99.53	QK(1)EK(1)K(1)IK(1)K	2	-1.3494	0	0	0	0	0	0	0	986.876	0
sp|P29374|ARI4A_HUMAN AT-rich interactive domain-containing protein 4A OS=Homo sapiens OX=9606 GN=ARID4A PE=1 SV=3	P29374	531	P29374_K531	99.53	QK(1)EK(1)K(1)IK(1)K	2	-1.3494	0	0	0	0	0	0	0	986.876	0
sp|P29374|ARI4A_HUMAN AT-rich interactive domain-containing protein 4A OS=Homo sapiens OX=9606 GN=ARID4A PE=1 SV=3	P29374	533	P29374_K533	99.53	QK(1)EK(1)K(1)IK(1)K	2	-1.3494	0	0	0	0	0	0	0	986.876	0
sp|P29992|GNA11_HUMAN Guanine nucleotide-binding protein subunit alpha-11 OS=Homo sapiens OX=9606 GN=GNA11 PE=1 SV=2	P29992	16	P29992_K16	50.492	MTLESMMACCLSDEVK(0.979)ESK(0.021)RINAEIEK	3	0.58747	0	5484.84	13011.4	0	0	0	15808.5	0	9566.54
sp|P30101|PDIA3_HUMAN Protein disulfide-isomerase A3 OS=Homo sapiens OX=9606 GN=PDIA3 PE=1 SV=4	P30101	258	P30101_K258	48.984	DLIQGK(0.978)DLLIAYYDVDYEK(0.022)NAK	3	1.1906	9524.55	2688.73	11207.9	32418.5	0	0	57545.7	0	34111
sp|P30622|CLIP1_HUMAN CAP-Gly domain-containing linker protein 1 OS=Homo sapiens OX=9606 GN=CLIP1 PE=1 SV=2	P30622	805	P30622_K805	76.478	QIK(1)HLEIEK	3	-0.40462	95.7327	0	0	756.164	1767.58	1521.42	0	1615.41	0
sp|P30622|CLIP1_HUMAN CAP-Gly domain-containing linker protein 1 OS=Homo sapiens OX=9606 GN=CLIP1 PE=1 SV=2	P30622	985	P30622_K985	48.053	SIEDMTVK(1)AEQSQQEAAK	3	1.1125	3038.29	1910.01	4728.74	0	0	0	0	0	0
sp|P30825|CTR1_HUMAN High affinity cationic amino acid transporter 1 OS=Homo sapiens OX=9606 GN=SLC7A1 PE=1 SV=1	P30825	4	P30825_K4	50.088	GCK(1)VLLNIGQQMLRR	3	-3.0784	0	0	0	0	0	0	0	0	0
sp|P31040|SDHA_HUMAN Succinate dehydrogenase [ubiquinone] flavoprotein subunit, mitochondrial OS=Homo sapiens OX=9606 GN=SDHA PE=1 SV=2	P31040	498	P31040_K498	49.537	VPPIK(0.002)PNAGEESVMNLDK(0.998)LR	3	0.036271	0	0	0	134493	5227.75	71590	0	125871	0
sp|P31269|HXA9_HUMAN Homeobox protein Hox-A9 OS=Homo sapiens OX=9606 GN=HOXA9 PE=1 SV=4	P31269	260	P31269_K260	67.563	RMK(0.991)MK(0.917)K(0.917)INK(0.175)DR	2	-4.0277	0	0	0	0	0	0	0	0	0
sp|P31269|HXA9_HUMAN Homeobox protein Hox-A9 OS=Homo sapiens OX=9606 GN=HOXA9 PE=1 SV=4	P31269	262	P31269_K262	67.563	RMK(0.991)MK(0.917)K(0.917)INK(0.175)DR	2	-4.0277	0	0	0	0	0	0	0	0	0
sp|P31269|HXA9_HUMAN Homeobox protein Hox-A9 OS=Homo sapiens OX=9606 GN=HOXA9 PE=1 SV=4	P31269	263	P31269_K263	67.563	RMK(0.991)MK(0.917)K(0.917)INK(0.175)DR	2	-4.0277	0	0	0	0	0	0	0	0	0
sp|P35268|RL22_HUMAN Large ribosomal subunit protein eL22 OS=Homo sapiens OX=9606 GN=RPL22 PE=1 SV=2	P35268	5	P35268_K5	120.57	APVK(1)K(1)LVVK(1)GGK	2	0.10767	0	0	0	44130.5	77905	62614.5	87774.1	275210	96401
sp|P35268|RL22_HUMAN Large ribosomal subunit protein eL22 OS=Homo sapiens OX=9606 GN=RPL22 PE=1 SV=2	P35268	6	P35268_K6	120.57	APVK(1)K(1)LVVK(1)GGK	2	0.10767	0	0	0	44130.5	77905	62614.5	87774.1	275210	96401
sp|P35268|RL22_HUMAN Large ribosomal subunit protein eL22 OS=Homo sapiens OX=9606 GN=RPL22 PE=1 SV=2	P35268	10	P35268_K10	120.57	APVK(1)K(1)LVVK(1)GGK	2	0.10767	0	0	0	44130.5	77905	62614.5	87774.1	275210	96401
sp|P35579|MYH9_HUMAN Myosin-9 OS=Homo sapiens OX=9606 GN=MYH9 PE=1 SV=4;sp|P35580|MYH10_HUMAN Myosin-10 OS=Homo sapiens OX=9606 GN=MYH10 PE=1 SV=3	P35579;P35580	682;689	P35579_K682	60.364	AGK(1)LDPHLVLDQLR	3	-0.35312	958.991	0	2766.94	4615.41	0	0	0	3775.28	0
sp|P35579|MYH9_HUMAN Myosin-9 OS=Homo sapiens OX=9606 GN=MYH9 PE=1 SV=4	P35579	64	P35579_K64	40.477	K(0.999)VK(0.998)VNK(0.999)DDIQK(0.003)MNPPK	4	-1.1276	0	0	0	3212.1	2680.9	1698.74	0	0	0
sp|P35579|MYH9_HUMAN Myosin-9 OS=Homo sapiens OX=9606 GN=MYH9 PE=1 SV=4	P35579	66	P35579_K66	40.477	K(0.999)VK(0.998)VNK(0.999)DDIQK(0.003)MNPPK	4	-1.1276	0	0	0	3212.1	2680.9	1698.74	0	0	0
sp|P35579|MYH9_HUMAN Myosin-9 OS=Homo sapiens OX=9606 GN=MYH9 PE=1 SV=4	P35579	69	P35579_K69	40.477	K(0.999)VK(0.998)VNK(0.999)DDIQK(0.003)MNPPK	4	-1.1276	0	0	0	3212.1	2680.9	1698.74	0	0	0
sp|P35580|MYH10_HUMAN Myosin-10 OS=Homo sapiens OX=9606 GN=MYH10 PE=1 SV=3	P35580	1619	P35580_K1619	44.5	ALAVASK(0.963)K(0.92)K(0.646)MEIDLK(0.47)DLEAQIEAANK	3	3.7749	0	0	0	0	0	0	0	0	641.208
sp|P35580|MYH10_HUMAN Myosin-10 OS=Homo sapiens OX=9606 GN=MYH10 PE=1 SV=3	P35580	1620	P35580_K1620	44.5	ALAVASK(0.963)K(0.92)K(0.646)MEIDLK(0.47)DLEAQIEAANK	3	3.7749	0	0	0	0	0	0	0	0	641.208
sp|P35580|MYH10_HUMAN Myosin-10 OS=Homo sapiens OX=9606 GN=MYH10 PE=1 SV=3	P35580	1621	P35580_K1621	44.5	ALAVASK(0.963)K(0.92)K(0.646)MEIDLK(0.47)DLEAQIEAANK	3	3.7749	0	0	0	0	0	0	0	0	641.208
sp|P35659|DEK_HUMAN Protein DEK OS=Homo sapiens OX=9606 GN=DEK PE=1 SV=1	P35659	195	P35659_K195	44.258	ILNFLMHPK(0.003)PSGK(0.015)PLPK(0.981)SK	5	-0.39946	0	0	0	11209.5	0	0	0	14080.5	4269.84
sp|P35663|CYLC1_HUMAN Cylicin-1 OS=Homo sapiens OX=9606 GN=CYLC1 PE=2 SV=2	P35663	459	P35663_K459	63.426	GK(0.128)K(0.872)DEK(0.697)K(0.697)GK(0.697)K(0.908)DSK	2	2.7005	53.4006	0	90.8077	0	0	0	0	0	155.322
sp|P35663|CYLC1_HUMAN Cylicin-1 OS=Homo sapiens OX=9606 GN=CYLC1 PE=2 SV=2	P35663	462	P35663_K462	63.426	GK(0.128)K(0.872)DEK(0.697)K(0.697)GK(0.697)K(0.908)DSK	2	2.7005	53.4006	0	90.8077	0	0	0	0	0	155.322
sp|P35663|CYLC1_HUMAN Cylicin-1 OS=Homo sapiens OX=9606 GN=CYLC1 PE=2 SV=2	P35663	463	P35663_K463	63.426	GK(0.128)K(0.872)DEK(0.697)K(0.697)GK(0.697)K(0.908)DSK	2	2.7005	53.4006	0	90.8077	0	0	0	0	0	155.322
sp|P35663|CYLC1_HUMAN Cylicin-1 OS=Homo sapiens OX=9606 GN=CYLC1 PE=2 SV=2	P35663	465	P35663_K465	63.426	GK(0.128)K(0.872)DEK(0.697)K(0.697)GK(0.697)K(0.908)DSK	2	2.7005	53.4006	0	90.8077	0	0	0	0	0	155.322
sp|P35663|CYLC1_HUMAN Cylicin-1 OS=Homo sapiens OX=9606 GN=CYLC1 PE=2 SV=2	P35663	466	P35663_K466	63.426	GK(0.128)K(0.872)DEK(0.697)K(0.697)GK(0.697)K(0.908)DSK	2	2.7005	53.4006	0	90.8077	0	0	0	0	0	155.322
sp|P36383|CXG1_HUMAN Gap junction gamma-1 protein OS=Homo sapiens OX=9606 GN=GJC1 PE=1 SV=2	P36383	371	P36383_K371	53.073	K(0.403)AK(0.532)VGSK(0.056)AGSNK(0.01)STASSK(0.998)SGDGK	3	1.1742	0	2291.22	0	0	6628.82	7719.33	4908.35	5473.55	0
sp|P36383|CXG1_HUMAN Gap junction gamma-1 protein OS=Homo sapiens OX=9606 GN=GJC1 PE=1 SV=2	P36383	386	P36383_K386	53.073	K(0.403)AK(0.532)VGSK(0.056)AGSNK(0.01)STASSK(0.998)SGDGK	3	1.1742	0	2291.22	0	0	6628.82	7719.33	4908.35	5473.55	0
sp|P36537|UDB10_HUMAN UDP-glucuronosyltransferase 2B10 OS=Homo sapiens OX=9606 GN=UGT2B10 PE=1 SV=1	P36537	127	P36537_K127	49.036	NFCK(1)DVVSNK(1)K(1)LMK(1)K(1)LQESR	3	0.45189	0	4671.16	0	0	0	0	0	0	0
sp|P36537|UDB10_HUMAN UDP-glucuronosyltransferase 2B10 OS=Homo sapiens OX=9606 GN=UGT2B10 PE=1 SV=1	P36537	133	P36537_K133	49.036	NFCK(1)DVVSNK(1)K(1)LMK(1)K(1)LQESR	3	0.45189	0	4671.16	0	0	0	0	0	0	0
sp|P36537|UDB10_HUMAN UDP-glucuronosyltransferase 2B10 OS=Homo sapiens OX=9606 GN=UGT2B10 PE=1 SV=1	P36537	134	P36537_K134	49.036	NFCK(1)DVVSNK(1)K(1)LMK(1)K(1)LQESR	3	0.45189	0	4671.16	0	0	0	0	0	0	0
sp|P36537|UDB10_HUMAN UDP-glucuronosyltransferase 2B10 OS=Homo sapiens OX=9606 GN=UGT2B10 PE=1 SV=1	P36537	137	P36537_K137	49.036	NFCK(1)DVVSNK(1)K(1)LMK(1)K(1)LQESR	3	0.45189	0	4671.16	0	0	0	0	0	0	0
sp|P36537|UDB10_HUMAN UDP-glucuronosyltransferase 2B10 OS=Homo sapiens OX=9606 GN=UGT2B10 PE=1 SV=1	P36537	138	P36537_K138	49.036	NFCK(1)DVVSNK(1)K(1)LMK(1)K(1)LQESR	3	0.45189	0	4671.16	0	0	0	0	0	0	0
sp|P36578|RL4_HUMAN Large ribosomal subunit protein uL4 OS=Homo sapiens OX=9606 GN=RPL4 PE=1 SV=5	P36578	193	P36578_K193	71.342	AGK(0.987)GK(0.013)MRNRR	2	1.9626	0	0	0	0	0	0	0	0	0
sp|P36888|FLT3_HUMAN Receptor-type tyrosine-protein kinase FLT3 OS=Homo sapiens OX=9606 GN=FLT3 PE=1 SV=2	P36888	634	P36888_K634	45.631	VLGSGAFGK(0.001)VMNATAYGISK(0.964)TGVSIQVAVK(0.028)MLK(0.005)EK(0.001)ADSSER	3	-1.2239	0	0	0	0	0	0	0	0	0
sp|P37837|TALDO_HUMAN Transaldolase OS=Homo sapiens OX=9606 GN=TALDO1 PE=1 SV=2	P37837	321	P37837_K321	45.878	LSDGIRK(0.024)FAADAVK(0.976)LERMLTERMFNAENGK	3	-0.30067	983.379	1049.46	1680.79	1796.62	0	1716.39	0	0	0
sp|P38432|COIL_HUMAN Coilin OS=Homo sapiens OX=9606 GN=COIL PE=1 SV=1	P38432	188	P38432_K188	58.699	K(1)EK(1)CEYK(1)K(1)K(1)AK	3	-0.21554	950.42	492.845	1604.37	2828.05	0	0	0	0	0
sp|P38432|COIL_HUMAN Coilin OS=Homo sapiens OX=9606 GN=COIL PE=1 SV=1	P38432	190	P38432_K190	58.699	K(1)EK(1)CEYK(1)K(1)K(1)AK	3	-0.21554	950.42	492.845	1604.37	2828.05	0	0	0	0	0
sp|P38432|COIL_HUMAN Coilin OS=Homo sapiens OX=9606 GN=COIL PE=1 SV=1	P38432	194	P38432_K194	58.699	K(1)EK(1)CEYK(1)K(1)K(1)AK	3	-0.21554	950.42	492.845	1604.37	2828.05	0	0	0	0	0
sp|P38432|COIL_HUMAN Coilin OS=Homo sapiens OX=9606 GN=COIL PE=1 SV=1	P38432	195	P38432_K195	58.699	K(1)EK(1)CEYK(1)K(1)K(1)AK	3	-0.21554	950.42	492.845	1604.37	2828.05	0	0	0	0	0
sp|P38432|COIL_HUMAN Coilin OS=Homo sapiens OX=9606 GN=COIL PE=1 SV=1	P38432	196	P38432_K196	58.699	K(1)EK(1)CEYK(1)K(1)K(1)AK	3	-0.21554	950.42	492.845	1604.37	2828.05	0	0	0	0	0
sp|Q13002|GRIK2_HUMAN Glutamate receptor ionotropic, kainate 2 OS=Homo sapiens OX=9606 GN=GRIK2 PE=1 SV=1;sp|P39086|GRIK1_HUMAN Glutamate receptor ionotropic, kainate 1 OS=Homo sapiens OX=9606 GN=GRIK1 PE=1 SV=1;sp|Q16099|GRIK4_HUMAN Glutamate receptor ion	Q13002;P39086;Q16099;Q16478	531;546;515;514	Q13002_K531	49.223	VIDFSK(1)PFMTLGISILYR	3	-0.32071	0	0	0	2098.41	3654.24	909.337	0	4014.37	3534
sp|P39748|FEN1_HUMAN Flap endonuclease 1 OS=Homo sapiens OX=9606 GN=FEN1 PE=1 SV=1	P39748	356	P39748_K356	81.594	RK(1)EPEPK(1)GSTK(1)K(1)K	2	0.2923	0	0	0	8016.69	13484.8	5954.5	0	0	0
sp|P39748|FEN1_HUMAN Flap endonuclease 1 OS=Homo sapiens OX=9606 GN=FEN1 PE=1 SV=1	P39748	361	P39748_K361	81.594	RK(1)EPEPK(1)GSTK(1)K(1)K	2	0.2923	0	0	0	8016.69	13484.8	5954.5	0	0	0
sp|P39748|FEN1_HUMAN Flap endonuclease 1 OS=Homo sapiens OX=9606 GN=FEN1 PE=1 SV=1	P39748	365	P39748_K365	81.594	RK(1)EPEPK(1)GSTK(1)K(1)K	2	0.2923	0	0	0	8016.69	13484.8	5954.5	0	0	0
sp|P39748|FEN1_HUMAN Flap endonuclease 1 OS=Homo sapiens OX=9606 GN=FEN1 PE=1 SV=1	P39748	366	P39748_K366	81.594	RK(1)EPEPK(1)GSTK(1)K(1)K	2	0.2923	0	0	0	8016.69	13484.8	5954.5	0	0	0
sp|P39748|FEN1_HUMAN Flap endonuclease 1 OS=Homo sapiens OX=9606 GN=FEN1 PE=1 SV=1	P39748	354	P39748_K354	149.33	VTGSLSSAK(1)R	2	-0.73257	0	0	0	236399	227628	229051	145854	357997	354897
sp|P42285|MTREX_HUMAN Exosome RNA helicase MTR4 OS=Homo sapiens OX=9606 GN=MTREX PE=1 SV=3	P42285	24	P42285_K24	79.515	ADAFGDELFSVFEGDSTTAAGTK(1)K	2	0.85406	0	0	0	28661	26181.6	33521.5	32406.4	41469.3	19487.5
sp|P42285|MTREX_HUMAN Exosome RNA helicase MTR4 OS=Homo sapiens OX=9606 GN=MTREX PE=1 SV=3	P42285	25	P42285_K25	79.515	ADAFGDELFSVFEGDSTTAAGTK(0.908)K(0.888)DK(0.203)EK	3	0.42361	0	0	0	11045.5	9673.96	11659.3	16114.5	19017.2	0
sp|P42285|MTREX_HUMAN Exosome RNA helicase MTR4 OS=Homo sapiens OX=9606 GN=MTREX PE=1 SV=3	P42285	27	P42285_K27	41.749	ADAFGDELFSVFEGDSTTAAGTK(0.653)K(0.674)DK(0.674)EK	3	0.26936	0	0	0	0	0	11659.3	0	19017.2	0
sp|P45378|TNNT3_HUMAN Troponin T, fast skeletal muscle OS=Homo sapiens OX=9606 GN=TNNT3 PE=1 SV=3	P45378	153	P45378_K153	62.528	EEEDAKRRAEDDLK(0.333)K(0.333)K(0.333)K	2	-0.17751	0	0	0	0	0	0	0	0	0
sp|P45378|TNNT3_HUMAN Troponin T, fast skeletal muscle OS=Homo sapiens OX=9606 GN=TNNT3 PE=1 SV=3	P45378	154	P45378_K154	62.528	EEEDAKRRAEDDLK(0.333)K(0.333)K(0.333)K	2	-0.17751	0	0	0	0	0	0	0	0	0
sp|P45378|TNNT3_HUMAN Troponin T, fast skeletal muscle OS=Homo sapiens OX=9606 GN=TNNT3 PE=1 SV=3	P45378	155	P45378_K155	62.528	EEEDAKRRAEDDLK(0.333)K(0.333)K(0.333)K	2	-0.17751	0	0	0	0	0	0	0	0	0
sp|P46013|KI67_HUMAN Proliferation marker protein Ki-67 OS=Homo sapiens OX=9606 GN=MKI67 PE=1 SV=2	P46013	1756	P46013_K1756	72.932	ASQPDLVDTPTSSK(0.049)PQPK(0.951)R	3	0.37911	0	0	0	0	7224.6	0	3027.97	11315.6	0
sp|P46777|RL5_HUMAN Large ribosomal subunit protein uL18 OS=Homo sapiens OX=9606 GN=RPL5 PE=1 SV=3	P46777	276	P46777_K276	85.359	MSLAQK(1)K	2	1.3072	0	0	0	7231.8	4772.72	0	11161.1	11932.3	15274.9
sp|P46777|RL5_HUMAN Large ribosomal subunit protein uL18 OS=Homo sapiens OX=9606 GN=RPL5 PE=1 SV=3	P46777	258	P46777_K258	52.716	PK(1)K(1)EVK(0.147)K(0.853)K	1	-0.63892	0	0	0	5105.64	4141.66	5544.15	4275.63	12445.2	2254.32
sp|P46777|RL5_HUMAN Large ribosomal subunit protein uL18 OS=Homo sapiens OX=9606 GN=RPL5 PE=1 SV=3	P46777	259	P46777_K259	52.716	PK(1)K(1)EVK(0.147)K(0.853)K	1	-0.63892	0	0	0	5105.64	4141.66	5544.15	4275.63	12445.2	2254.32
sp|P46777|RL5_HUMAN Large ribosomal subunit protein uL18 OS=Homo sapiens OX=9606 GN=RPL5 PE=1 SV=3	P46777	263	P46777_K263	52.716	PK(1)K(1)EVK(0.147)K(0.853)K	1	-0.63892	0	0	0	5105.64	4141.66	5544.15	4275.63	12445.2	2254.32
sp|P46777|RL5_HUMAN Large ribosomal subunit protein uL18 OS=Homo sapiens OX=9606 GN=RPL5 PE=1 SV=3	P46777	283	P46777_K283	88.338	VAQK(1)K(1)ASFLR	2	0.53379	0	0	0	13882.4	12430.4	3352.34	2630.07	20295	11327.7
sp|P46777|RL5_HUMAN Large ribosomal subunit protein uL18 OS=Homo sapiens OX=9606 GN=RPL5 PE=1 SV=3	P46777	284	P46777_K284	88.338	VAQK(1)K(1)ASFLR	2	0.53379	0	0	0	13882.4	12430.4	3352.34	2630.07	20295	11327.7
sp|P48382|RFX5_HUMAN DNA-binding protein RFX5 OS=Homo sapiens OX=9606 GN=RFX5 PE=1 SV=1	P48382	449	P48382_K449	75.911	TAEVPVSEASGQAPPAK(1)AAK	2	-0.2865	0	0	0	4345.92	0	2872.5	2681.51	5685.11	0
sp|P49450|CENPA_HUMAN Histone H3-like centromeric protein A OS=Homo sapiens OX=9606 GN=CENPA PE=1 SV=1	P49450	124	P49450_K124	91.313	VTLFPK(1)DVQLAR	3	0.85193	0	0	0	303082	0	0	0	0	2796.19
sp|P49711|CTCF_HUMAN Transcriptional repressor CTCF OS=Homo sapiens OX=9606 GN=CTCF PE=1 SV=1	P49711	253	P49711_K253	142.36	VVGNMKPPK(1)PTK	2	-0.38043	0	0	0	21108.4	12235.3	13460.5	11336.7	46747.7	38858.4
sp|P49815|TSC2_HUMAN Tuberin OS=Homo sapiens OX=9606 GN=TSC2 PE=1 SV=2	P49815	7	P49815_K7	70.256	AKPTSK(1)DSGLK	2	-4.3012	0	0	0	0	0	0	1197.67	0	0
sp|P50914|RL14_HUMAN Large ribosomal subunit protein eL14 OS=Homo sapiens OX=9606 GN=RPL14 PE=1 SV=4	P50914	193	P50914_K193	92.063	AAPAPK(1)AQK(1)GQK(1)APAQK	2	1.651	0	0	0	0	0	0	0	4124.56	10605.2
sp|P50914|RL14_HUMAN Large ribosomal subunit protein eL14 OS=Homo sapiens OX=9606 GN=RPL14 PE=1 SV=4	P50914	196	P50914_K196	92.063	AAPAPK(1)AQK(1)GQK(1)APAQK	2	1.651	0	0	0	0	0	0	0	4124.56	10605.2
sp|P50914|RL14_HUMAN Large ribosomal subunit protein eL14 OS=Homo sapiens OX=9606 GN=RPL14 PE=1 SV=4	P50914	199	P50914_K199	92.063	AAPAPK(1)AQK(1)GQK(1)APAQK	2	1.651	0	0	0	0	0	0	0	4124.56	10605.2
sp|P51532|SMCA4_HUMAN Transcription activator BRG1 OS=Homo sapiens OX=9606 GN=SMARCA4 PE=1 SV=2	P51532	437	P51532_K437	109.84	DTALETALNAK(1)AYK(1)R	2	-0.18032	0	0	0	14750.5	20482.6	32027.3	16551	20639.2	18314.8
sp|P51532|SMCA4_HUMAN Transcription activator BRG1 OS=Homo sapiens OX=9606 GN=SMARCA4 PE=1 SV=2	P51532	440	P51532_K440	101.75	DTALETALNAK(1)AYK(1)R	2	-0.18032	0	0	0	0	0	6810.6	6575.84	0	0
sp|P51858|HDGF_HUMAN Hepatoma-derived growth factor OS=Homo sapiens OX=9606 GN=HDGF PE=1 SV=1	P51858	39	P51858_K39	114.21	IDEMPEAAVK(1)STANK	2	-0.38613	0	0	0	30881.7	48753.2	23979.2	46242.3	78661.3	64477.5
sp|P51858|HDGF_HUMAN Hepatoma-derived growth factor OS=Homo sapiens OX=9606 GN=HDGF PE=1 SV=1	P51858	148	P51858_K148	58.781	LVIDEPAK(0.034)EK(0.516)NEK(0.172)GALK(0.277)R	2	0.21478	2503.79	1927.86	2370.87	2605.65	3191.19	2759.45	0	3826.62	0
sp|P52292|IMA1_HUMAN Importin subunit alpha-1 OS=Homo sapiens OX=9606 GN=KPNA2 PE=1 SV=1	P52292	20	P52292_K20	108.98	NK(1)GK(1)DSTEMR	2	-0.1972	0	0	0	10058.9	7651.91	6017.84	11854.1	11193.9	14008
sp|P52292|IMA1_HUMAN Importin subunit alpha-1 OS=Homo sapiens OX=9606 GN=KPNA2 PE=1 SV=1	P52292	22	P52292_K22	108.98	NK(1)GK(1)DSTEMR	2	-0.1972	0	0	0	10058.9	7651.91	6017.84	11854.1	11193.9	14008
sp|P52298|NCBP2_HUMAN Nuclear cap-binding protein subunit 2 OS=Homo sapiens OX=9606 GN=NCBP2 PE=1 SV=1	P52298	7	P52298_K7	100.19	SGGLLK(1)ALR	2	-0.29996	0	0	0	38989.4	65636.6	82805.9	37726.2	93361	92433.6
sp|P52306|GDS1_HUMAN Rap1 GTPase-GDP dissociation stimulator 1 OS=Homo sapiens OX=9606 GN=RAP1GDS1 PE=1 SV=3	P52306	9	P52306_K9	65.241	MDNLSDTLK(1)K	2	-1.2513	0	0	0	0	0	0	0	0	0
sp|P52564|MP2K6_HUMAN Dual specificity mitogen-activated protein kinase kinase 6 OS=Homo sapiens OX=9606 GN=MAP2K6 PE=1 SV=1	P52564	5	P52564_K5	70.056	SQSK(0.999)GK(0.001)K(0.001)R	2	0.48043	0	0	0	0	559.602	268.209	0	0	0
sp|P52756|RBM5_HUMAN RNA-binding protein 5 OS=Homo sapiens OX=9606 GN=RBM5 PE=1 SV=2	P52756	528	P52756_K528	69.812	EGK(0.05)EK(0.95)K(1)EK(1)PK	1	0.59833	85798.7	18646.4	96399.5	72095.4	65028.3	55176	15747.7	50282	28825.1
sp|P52756|RBM5_HUMAN RNA-binding protein 5 OS=Homo sapiens OX=9606 GN=RBM5 PE=1 SV=2	P52756	529	P52756_K529	69.812	EGK(0.05)EK(0.95)K(1)EK(1)PK	1	0.59833	85798.7	18646.4	96399.5	72095.4	65028.3	55176	15747.7	50282	28825.1
sp|P52756|RBM5_HUMAN RNA-binding protein 5 OS=Homo sapiens OX=9606 GN=RBM5 PE=1 SV=2	P52756	531	P52756_K531	69.812	EGK(0.05)EK(0.95)K(1)EK(1)PK	1	0.59833	85798.7	18646.4	96399.5	72095.4	65028.3	55176	15747.7	50282	28825.1
sp|P52926|HMGA2_HUMAN High mobility group protein HMGI-C OS=Homo sapiens OX=9606 GN=HMGA2 PE=1 SV=1	P52926	66	P52926_K66	147.92	SPSK(1)AAQK(1)K(1)AEATGEK	2	0.095575	0	0	0	135993	111766	86001.1	99042.5	174940	144117
sp|P52926|HMGA2_HUMAN High mobility group protein HMGI-C OS=Homo sapiens OX=9606 GN=HMGA2 PE=1 SV=1	P52926	67	P52926_K67	147.92	SPSK(1)AAQK(1)K(1)AEATGEK	2	0.095575	0	0	0	135993	111766	86001.1	99042.5	174940	144117
sp|P52926|HMGA2_HUMAN High mobility group protein HMGI-C OS=Homo sapiens OX=9606 GN=HMGA2 PE=1 SV=1	P52926	26	P52926_K26	103.13	MSARGEGAGQPSTSAQGQPAAPAPQK(1)RGRGR	3	2.0672	0	0	0	0	0	0	0	0	2538.63
sp|P52926|HMGA2_HUMAN High mobility group protein HMGI-C OS=Homo sapiens OX=9606 GN=HMGA2 PE=1 SV=1	P52926	46	P52926_K46	202	QQQEPTGEPSPK(1)RPR	2	-0.68624	0	0	0	5924.74	1360.32	643.006	743.256	2665.17	3039.58
sp|P52926|HMGA2_HUMAN High mobility group protein HMGI-C OS=Homo sapiens OX=9606 GN=HMGA2 PE=1 SV=1	P52926	90	P52926_K90	132.57	KWPQQVVQK(1)K	2	0.1978	0	0	0	0	20230.6	10725.9	0	31277.3	21504.9
sp|P52926|HMGA2_HUMAN High mobility group protein HMGI-C OS=Homo sapiens OX=9606 GN=HMGA2 PE=1 SV=1	P52926	58	P52926_K58	94.885	NK(1)SPSK(1)AAQK(1)K(1)AEATGEK	2	-0.5357	0	0	0	13636.8	12832.1	0	28165.2	54743.9	48057.2
sp|P52926|HMGA2_HUMAN High mobility group protein HMGI-C OS=Homo sapiens OX=9606 GN=HMGA2 PE=1 SV=1	P52926	62	P52926_K62	147.92	SPSK(1)AAQK(1)K(1)AEATGEK	2	0.095575	0	0	0	36765.8	28925.4	28159.5	23238	32319.6	11694.1
sp|P53396|ACLY_HUMAN ATP-citrate synthase OS=Homo sapiens OX=9606 GN=ACLY PE=1 SV=3	P53396	732	P53396_K732	54.15	MIVVLGEIGGTEEYK(0.003)ICRGIK(0.997)EGR	3	-1.9708	5557.43	0	0	10696.3	7784.02	10817.2	5005.53	0	0
sp|P53999|TCP4_HUMAN Activated RNA polymerase II transcriptional coactivator p15 OS=Homo sapiens OX=9606 GN=SUB1 PE=1 SV=3	P53999	28	P53999_K28	84.173	K(0.868)K(0.132)QVAPEKPVKK	3	-0.299	0	0	418.527	6347.19	0	0	0	5043.31	1964.99
sp|P53999|TCP4_HUMAN Activated RNA polymerase II transcriptional coactivator p15 OS=Homo sapiens OX=9606 GN=SUB1 PE=1 SV=3	P53999	29	P53999_K29	128.95	K(0.02)K(0.98)QVAPEK(0.003)PVK(0.997)K	2	0.3796	0	0	0	83387.8	46031.7	37662.8	0	125342	119842
sp|P53999|TCP4_HUMAN Activated RNA polymerase II transcriptional coactivator p15 OS=Homo sapiens OX=9606 GN=SUB1 PE=1 SV=3	P53999	38	P53999_K38	128.95	K(0.428)K(0.572)QVAPEK(0.001)PVK(0.999)K	3	0.14725	0	0	0	82248.5	46031.7	37662.8	0	124486	119842
sp|P54296|MYOM2_HUMAN Myomesin-2 OS=Homo sapiens OX=9606 GN=MYOM2 PE=1 SV=3	P54296	324	P54296_K324	47.38	DDVLLK(0.457)ESK(0.457)WTK(0.086)MFFGEGQASLSFSHLHK	3	-0.64475	0	0	0	0	0	0	0	0	0
sp|P54296|MYOM2_HUMAN Myomesin-2 OS=Homo sapiens OX=9606 GN=MYOM2 PE=1 SV=3	P54296	327	P54296_K327	47.38	DDVLLK(0.457)ESK(0.457)WTK(0.086)MFFGEGQASLSFSHLHK	3	-0.64475	0	0	0	0	0	0	0	0	0
sp|P58876|H2B1D_HUMAN Histone H2B type 1-D OS=Homo sapiens OX=9606 GN=H2BC5 PE=1 SV=2;sp|Q99877|H2B1N_HUMAN Histone H2B type 1-N OS=Homo sapiens OX=9606 GN=H2BC15 PE=1 SV=3;sp|Q93079|H2B1H_HUMAN Histone H2B type 1-H OS=Homo sapiens OX=9606 GN=H2BC9 PE=1 SV	P58876;Q99877;Q93079;Q99880	13;13;13;13	P58876_K13	154.46	SAPAPK(1)K(1)GSK(1)K(1)AVTK(1)AQK(1)K	3	-0.022591	0	0	0	28776.8	46380.9	30439.5	135965	285208	306397
sp|P58876|H2B1D_HUMAN Histone H2B type 1-D OS=Homo sapiens OX=9606 GN=H2BC5 PE=1 SV=2;sp|Q99877|H2B1N_HUMAN Histone H2B type 1-N OS=Homo sapiens OX=9606 GN=H2BC15 PE=1 SV=3;sp|Q93079|H2B1H_HUMAN Histone H2B type 1-H OS=Homo sapiens OX=9606 GN=H2BC9 PE=1 SV	P58876;Q99877;Q93079;Q99880	16;16;16;16	P58876_K16	154.46	SAPAPK(1)K(1)GSK(1)K(1)AVTK(1)AQK(1)K	3	-0.022591	0	0	0	76607.2	85011.2	42928.8	135965	351554	390590
sp|P58876|H2B1D_HUMAN Histone H2B type 1-D OS=Homo sapiens OX=9606 GN=H2BC5 PE=1 SV=2;sp|Q99877|H2B1N_HUMAN Histone H2B type 1-N OS=Homo sapiens OX=9606 GN=H2BC15 PE=1 SV=3;sp|Q93079|H2B1H_HUMAN Histone H2B type 1-H OS=Homo sapiens OX=9606 GN=H2BC9 PE=1 SV	P58876;Q99877;Q93079;Q99880	12;12;12;12	P58876_K12	154.46	SAPAPK(1)K(1)GSK(1)K(1)AVTK(1)AQK(1)K	3	-0.022591	0	0	0	27649.8	45761.7	30439.5	135965	283857	303595
sp|P60985|KTDAP_HUMAN Keratinocyte differentiation-associated protein OS=Homo sapiens OX=9606 GN=KRTDAP PE=1 SV=1	P60985	53	P60985_K53	73.386	PEAFNTPFLNIDK(1)LR	2	0.9698	0	12859.9	0	0	0	0	16299.7	0	0
sp|P61353|RL27_HUMAN Large ribosomal subunit protein eL27 OS=Homo sapiens OX=9606 GN=RPL27 PE=1 SV=2	P61353	59	P61353_K59	107.34	KVTAAMGK(1)K(1)K	2	0.15065	0	0	0	2580.54	2964.9	1579.54	0	6994.73	0
sp|P61353|RL27_HUMAN Large ribosomal subunit protein eL27 OS=Homo sapiens OX=9606 GN=RPL27 PE=1 SV=2	P61353	60	P61353_K60	107.34	KVTAAMGK(1)K(1)K	2	0.15065	0	0	0	2580.54	2964.9	1579.54	0	6994.73	0
sp|P62241|RS8_HUMAN Small ribosomal subunit protein eS8 OS=Homo sapiens OX=9606 GN=RPS8 PE=1 SV=2	P62241	139	P62241_K139	120.63	LTPEEEEILNK(1)K(1)R	3	0.31565	0	0	0	0	6031.96	13041.3	11901.8	16550.8	10936
sp|P62241|RS8_HUMAN Small ribosomal subunit protein eS8 OS=Homo sapiens OX=9606 GN=RPS8 PE=1 SV=2	P62241	140	P62241_K140	120.63	LTPEEEEILNK(1)K(1)R	3	0.31565	0	0	0	0	6031.96	4712.27	6109.6	7779.24	5544.11
sp|P62495|ERF1_HUMAN Eukaryotic peptide chain release factor subunit 1 OS=Homo sapiens OX=9606 GN=ETF1 PE=1 SV=3	P62495	63	P62495_K63	67.358	MLADEFGTASNIK(1)SR	2	-0.38447	1781.8	0	2313.74	0	0	0	0	0	1068.96
sp|P62861|RS30_HUMAN Ubiquitin-like FUBI-ribosomal protein eS30 fusion protein OS=Homo sapiens OX=9606 GN=FAU PE=1 SV=2	P62861	92	P62861_K92	157.33	GQTPK(1)VAK(1)QEK	2	0.75619	0	0	0	0	3369.7	1738.09	0	8528.92	12923.5
sp|P62861|RS30_HUMAN Ubiquitin-like FUBI-ribosomal protein eS30 fusion protein OS=Homo sapiens OX=9606 GN=FAU PE=1 SV=2	P62861	95	P62861_K95	157.33	GQTPK(1)VAK(1)QEK	2	0.75619	0	0	0	0	3369.7	1738.09	0	8528.92	12923.5
sp|P62888|RL30_HUMAN Large ribosomal subunit protein eL30 OS=Homo sapiens OX=9606 GN=RPL30 PE=1 SV=2	P62888	5	P62888_K5	64.103	MVAAK(1)K(1)TK	2	-0.30174	0	0	0	0	0	0	0	0	0
sp|P62888|RL30_HUMAN Large ribosomal subunit protein eL30 OS=Homo sapiens OX=9606 GN=RPL30 PE=1 SV=2	P62888	6	P62888_K6	64.103	MVAAK(1)K(1)TK	2	-0.30174	0	0	0	0	0	0	0	0	0
sp|P68104|EF1A1_HUMAN Elongation factor 1-alpha 1 OS=Homo sapiens OX=9606 GN=EEF1A1 PE=1 SV=1;sp|Q5VTE0|EF1A3_HUMAN Putative elongation factor 1-alpha-like 3 OS=Homo sapiens OX=9606 GN=EEF1A1P5 PE=5 SV=1	P68104;Q5VTE0	408;408	P68104_K408	58.159	SGDAAIVDMVPGK(1)PMCVESFSDYPPLGR	2	-0.087034	82379.4	24733.6	96110.2	147015	97114	116840	74080.5	173466	94156.2
sp|P78364|PHC1_HUMAN Polyhomeotic-like protein 1 OS=Homo sapiens OX=9606 GN=PHC1 PE=1 SV=3	P78364	843	P78364_K843	98.182	MK(1)EFQEANYAR	2	0.042422	0	0	0	0	2239.05	9036.08	7230.75	18134.9	14370.7
sp|P82970|HMGN5_HUMAN High mobility group nucleosome-binding domain-containing protein 5 OS=Homo sapiens OX=9606 GN=HMGN5 PE=1 SV=1	P82970	35	P82970_K35	107.35	LSAMLVPVTPEVK(1)PK	2	-0.35627	0	0	0	52502.2	56550.5	34280.3	40504.4	86162.3	97314.8
sp|P82970|HMGN5_HUMAN High mobility group nucleosome-binding domain-containing protein 5 OS=Homo sapiens OX=9606 GN=HMGN5 PE=1 SV=1	P82970	37	P82970_K37	97.779	LSAMLVPVTPEVK(0.157)PK(0.843)R	2	0.12517	0	0	0	0	15179.3	0	3382.65	24197	22838.7
sp|P84101|SERF2_HUMAN Small EDRK-rich factor 2 OS=Homo sapiens OX=9606 GN=SERF2 PE=1 SV=1	P84101	47	P84101_K47	137.39	DSEIMQQK(1)QK(1)K(1)ANEK	2	0.28904	0	0	0	38001.8	39389.9	26028.1	32525.9	77876.4	68820.5
sp|P84101|SERF2_HUMAN Small EDRK-rich factor 2 OS=Homo sapiens OX=9606 GN=SERF2 PE=1 SV=1	P84101	49	P84101_K49	137.39	DSEIMQQK(1)QK(1)K(1)ANEK	2	0.28904	0	0	0	38001.8	39389.9	26028.1	32525.9	77876.4	68820.5
sp|P84101|SERF2_HUMAN Small EDRK-rich factor 2 OS=Homo sapiens OX=9606 GN=SERF2 PE=1 SV=1	P84101	50	P84101_K50	137.39	DSEIMQQK(1)QK(1)K(1)ANEK	2	0.28904	0	0	0	38001.8	39389.9	26028.1	32525.9	77876.4	68820.5
sp|P84101|SERF2_HUMAN Small EDRK-rich factor 2 OS=Homo sapiens OX=9606 GN=SERF2 PE=1 SV=1	P84101	13	P84101_K13	96.866	QK(1)NMK(1)K(1)QSDSVK	2	0.12254	0	0	0	6864.86	0	6218.59	8424.56	0	15067
sp|P84101|SERF2_HUMAN Small EDRK-rich factor 2 OS=Homo sapiens OX=9606 GN=SERF2 PE=1 SV=1	P84101	16	P84101_K16	96.866	QK(1)NMK(1)K(1)QSDSVK	2	0.12254	0	0	0	6864.86	0	6218.59	8424.56	0	15067
sp|P84101|SERF2_HUMAN Small EDRK-rich factor 2 OS=Homo sapiens OX=9606 GN=SERF2 PE=1 SV=1	P84101	17	P84101_K17	96.866	QK(1)NMK(1)K(1)QSDSVK	2	0.12254	0	0	0	6864.86	0	6218.59	8424.56	0	15067
sp|P84157|MXRA7_HUMAN Matrix-remodeling-associated protein 7 OS=Homo sapiens OX=9606 GN=MXRA7 PE=1 SV=1	P84157	178	P84157_K178	56.043	EQLAAIFK(1)LMK	3	3.6793	0	0	0	0	0	0	0	0	0
sp|Q00444|HXC5_HUMAN Homeobox protein Hox-C5 OS=Homo sapiens OX=9606 GN=HOXC5 PE=1 SV=1	Q00444	212	Q00444_K212	43.68	MK(0.001)WK(0.189)K(0.818)DSK(0.997)MK(0.999)SK(0.997)EAL	2	-1.7077	0	2035.18	2708.23	5456.77	0	0	0	0	3607.87
sp|Q00444|HXC5_HUMAN Homeobox protein Hox-C5 OS=Homo sapiens OX=9606 GN=HOXC5 PE=1 SV=1	Q00444	215	Q00444_K215	43.68	MK(0.001)WK(0.189)K(0.818)DSK(0.997)MK(0.999)SK(0.997)EAL	2	-1.7077	0	2035.18	2708.23	5456.77	0	0	0	0	3607.87
sp|Q00444|HXC5_HUMAN Homeobox protein Hox-C5 OS=Homo sapiens OX=9606 GN=HOXC5 PE=1 SV=1	Q00444	217	Q00444_K217	43.68	MK(0.001)WK(0.189)K(0.818)DSK(0.997)MK(0.999)SK(0.997)EAL	2	-1.7077	0	2035.18	2708.23	5456.77	0	0	0	0	3607.87
sp|Q00444|HXC5_HUMAN Homeobox protein Hox-C5 OS=Homo sapiens OX=9606 GN=HOXC5 PE=1 SV=1	Q00444	219	Q00444_K219	43.68	MK(0.001)WK(0.189)K(0.818)DSK(0.997)MK(0.999)SK(0.997)EAL	2	-1.7077	0	2035.18	2708.23	5456.77	0	0	0	0	3607.87
sp|Q01082|SPTB2_HUMAN Spectrin beta chain, non-erythrocytic 1 OS=Homo sapiens OX=9606 GN=SPTBN1 PE=1 SV=2	Q01082	2344	Q01082_K2344	112.02	AQTLPTSVVTITSESSPGK(1)R	2	0.45887	0	0	0	3898.94	10365.9	6965.7	5451.19	32869.9	0
sp|Q03001|DYST_HUMAN Dystonin OS=Homo sapiens OX=9606 GN=DST PE=1 SV=4	Q03001	7141	Q03001_K7141	46.415	GRAGRKRFPASSLYPSGSQTQIETK(1)NPR	3	-1.4322	0	0	0	7388.98	6999.61	9808.81	0	0	0
sp|Q03001|DYST_HUMAN Dystonin OS=Homo sapiens OX=9606 GN=DST PE=1 SV=4	Q03001	4222	Q03001_K4222	49.12	VK(1)K(1)FMETTDPSTASSLQAKMK	2	0.87134	0	0	0	2021.57	0	0	0	0	0
sp|Q03001|DYST_HUMAN Dystonin OS=Homo sapiens OX=9606 GN=DST PE=1 SV=4	Q03001	4223	Q03001_K4223	49.12	VK(1)K(1)FMETTDPSTASSLQAKMK	2	0.87134	0	0	0	2021.57	0	0	0	0	0
sp|Q04637|IF4G1_HUMAN Eukaryotic translation initiation factor 4 gamma 1 OS=Homo sapiens OX=9606 GN=EIF4G1 PE=1 SV=4	Q04637	952	Q04637_K952	43.914	AK(0.998)PRMDQYFNQMEK(0.945)IIK(0.138)EK(0.828)K(0.091)TSSR	2	-0.20819	68791.9	28794.3	23944.4	26534.8	25784.1	34556	27479.2	5853.43	0
sp|Q04637|IF4G1_HUMAN Eukaryotic translation initiation factor 4 gamma 1 OS=Homo sapiens OX=9606 GN=EIF4G1 PE=1 SV=4	Q04637	964	Q04637_K964	43.914	AK(0.998)PRMDQYFNQMEK(0.945)IIK(0.138)EK(0.828)K(0.091)TSSR	2	-0.20819	68791.9	28794.3	23944.4	26534.8	25784.1	34556	27479.2	5853.43	0
sp|Q04637|IF4G1_HUMAN Eukaryotic translation initiation factor 4 gamma 1 OS=Homo sapiens OX=9606 GN=EIF4G1 PE=1 SV=4	Q04637	969	Q04637_K969	43.914	AK(0.998)PRMDQYFNQMEK(0.945)IIK(0.138)EK(0.828)K(0.091)TSSR	2	-0.20819	68791.9	28794.3	23944.4	26534.8	25784.1	34556	27479.2	5853.43	0
sp|Q05519|SRS11_HUMAN Serine/arginine-rich splicing factor 11 OS=Homo sapiens OX=9606 GN=SRSF11 PE=1 SV=1	Q05519	241	Q05519_K241	164.81	EAQSLISAAIEPDK(0.882)K(0.882)EEK(0.236)R	3	-0.074238	3738.35	99625.4	112743	147702	87347.5	36080.5	16016	66156.9	75535.7
sp|Q05519|SRS11_HUMAN Serine/arginine-rich splicing factor 11 OS=Homo sapiens OX=9606 GN=SRSF11 PE=1 SV=1	Q05519	242	Q05519_K242	228.17	EAQSLISAAIEPDK(0.052)K(0.948)EEK	2	0.23217	110945	99625.4	112743	147702	95566	87999.3	32330.2	66156.9	64260.9
sp|Q05519|SRS11_HUMAN Serine/arginine-rich splicing factor 11 OS=Homo sapiens OX=9606 GN=SRSF11 PE=1 SV=1	Q05519	245	Q05519_K245	164.81	EAQSLISAAIEPDK(0.269)K(0.736)EEK(0.995)R	3	-0.23287	0	1783.98	2835.07	46612.4	43227.4	36080.5	20469.1	66156.9	60551.5
sp|Q05519|SRS11_HUMAN Serine/arginine-rich splicing factor 11 OS=Homo sapiens OX=9606 GN=SRSF11 PE=1 SV=1	Q05519	397	Q05519_K397	61.165	STSK(1)K(1)K(1)K(1)SK(0.998)DK(0.002)EK	2	0.2155	0	0	0	0	0	0	0	0	0
sp|Q05519|SRS11_HUMAN Serine/arginine-rich splicing factor 11 OS=Homo sapiens OX=9606 GN=SRSF11 PE=1 SV=1	Q05519	398	Q05519_K398	61.165	STSK(1)K(1)K(1)K(1)SK(0.998)DK(0.002)EK	2	0.2155	0	0	0	0	0	0	0	0	0
sp|Q05519|SRS11_HUMAN Serine/arginine-rich splicing factor 11 OS=Homo sapiens OX=9606 GN=SRSF11 PE=1 SV=1	Q05519	399	Q05519_K399	61.165	STSK(1)K(1)K(1)K(1)SK(0.998)DK(0.002)EK	2	0.2155	0	0	0	0	0	0	0	0	0
sp|Q05519|SRS11_HUMAN Serine/arginine-rich splicing factor 11 OS=Homo sapiens OX=9606 GN=SRSF11 PE=1 SV=1	Q05519	400	Q05519_K400	61.165	STSK(1)K(1)K(1)K(1)SK(0.998)DK(0.002)EK	2	0.2155	0	0	0	0	0	0	0	0	0
sp|Q05519|SRS11_HUMAN Serine/arginine-rich splicing factor 11 OS=Homo sapiens OX=9606 GN=SRSF11 PE=1 SV=1	Q05519	402	Q05519_K402	61.165	STSK(1)K(1)K(1)K(1)SK(0.998)DK(0.002)EK	2	0.2155	0	0	0	0	0	0	0	0	0
sp|Q05D60|DEUP1_HUMAN Deuterosome assembly protein 1 OS=Homo sapiens OX=9606 GN=DEUP1 PE=1 SV=2	Q05D60	407	Q05D60_K407	46.352	EK(1)MLAK(1)QK(1)VSDMKYK	2	1.6293	0	0	0	0	0	0	0	0	0
sp|Q05D60|DEUP1_HUMAN Deuterosome assembly protein 1 OS=Homo sapiens OX=9606 GN=DEUP1 PE=1 SV=2	Q05D60	411	Q05D60_K411	46.352	EK(1)MLAK(1)QK(1)VSDMKYK	2	1.6293	0	0	0	0	0	0	0	0	0
sp|Q05D60|DEUP1_HUMAN Deuterosome assembly protein 1 OS=Homo sapiens OX=9606 GN=DEUP1 PE=1 SV=2	Q05D60	413	Q05D60_K413	46.352	EK(1)MLAK(1)QK(1)VSDMKYK	2	1.6293	0	0	0	0	0	0	0	0	0
sp|Q06265|EXOS9_HUMAN Exosome complex component RRP45 OS=Homo sapiens OX=9606 GN=EXOSC9 PE=1 SV=3	Q06265	419	Q06265_K419	44.729	TQTTSAK(1)QEK(1)APSK(1)K(1)PVK(1)R	2	-0.19714	0	0	0	7219.22	0	10950.9	5196.4	11994	24446.7
sp|Q06265|EXOS9_HUMAN Exosome complex component RRP45 OS=Homo sapiens OX=9606 GN=EXOSC9 PE=1 SV=3	Q06265	422	Q06265_K422	44.729	TQTTSAK(1)QEK(1)APSK(1)K(1)PVK(1)R	2	-0.19714	0	0	0	7219.22	0	10950.9	5196.4	11994	24446.7
sp|Q06265|EXOS9_HUMAN Exosome complex component RRP45 OS=Homo sapiens OX=9606 GN=EXOSC9 PE=1 SV=3	Q06265	426	Q06265_K426	44.729	TQTTSAK(1)QEK(1)APSK(1)K(1)PVK(1)R	2	-0.19714	0	0	0	7219.22	0	10950.9	5196.4	11994	24446.7
sp|Q06265|EXOS9_HUMAN Exosome complex component RRP45 OS=Homo sapiens OX=9606 GN=EXOSC9 PE=1 SV=3	Q06265	427	Q06265_K427	44.729	TQTTSAK(1)QEK(1)APSK(1)K(1)PVK(1)R	2	-0.19714	0	0	0	7219.22	0	10950.9	5196.4	11994	24446.7
sp|Q06265|EXOS9_HUMAN Exosome complex component RRP45 OS=Homo sapiens OX=9606 GN=EXOSC9 PE=1 SV=3	Q06265	430	Q06265_K430	44.729	TQTTSAK(1)QEK(1)APSK(1)K(1)PVK(1)R	2	-0.19714	0	0	0	7219.22	0	10950.9	5196.4	11994	24446.7
sp|Q07002|CDK18_HUMAN Cyclin-dependent kinase 18 OS=Homo sapiens OX=9606 GN=CDK18 PE=1 SV=4	Q07002	5	Q07002_K5	40.987	IMNK(0.991)MK(0.091)NFK(0.917)R	2	-2.3907	0	0	0	0	0	0	0	0	0
sp|Q07002|CDK18_HUMAN Cyclin-dependent kinase 18 OS=Homo sapiens OX=9606 GN=CDK18 PE=1 SV=4	Q07002	10	Q07002_K10	40.987	IMNK(0.991)MK(0.091)NFK(0.917)R	2	-2.3907	0	0	0	0	0	0	0	0	0
sp|Q07973|CP24A_HUMAN 1,25-dihydroxyvitamin D(3) 24-hydroxylase, mitochondrial OS=Homo sapiens OX=9606 GN=CYP24A1 PE=1 SV=2	Q07973	168	Q07973_K168	44.816	K(0.053)LMK(0.949)PGEVMK(0.998)LDNK	3	-0.70835	1835.42	1034.39	1950.88	2138.66	4085.15	0	1260.23	3800.21	0
sp|Q07973|CP24A_HUMAN 1,25-dihydroxyvitamin D(3) 24-hydroxylase, mitochondrial OS=Homo sapiens OX=9606 GN=CYP24A1 PE=1 SV=2	Q07973	174	Q07973_K174	44.816	K(0.053)LMK(0.949)PGEVMK(0.998)LDNK	3	-0.70835	1835.42	1034.39	1950.88	2138.66	4085.15	0	1260.23	3800.21	0
sp|Q08170|SRSF4_HUMAN Serine/arginine-rich splicing factor 4 OS=Homo sapiens OX=9606 GN=SRSF4 PE=1 SV=2	Q08170	387	Q08170_K387	52.009	DSK(1)AGSSK(1)K(1)K	1	-0.45032	0	0	0	0	0	0	0	988.094	2571.71
sp|Q08170|SRSF4_HUMAN Serine/arginine-rich splicing factor 4 OS=Homo sapiens OX=9606 GN=SRSF4 PE=1 SV=2	Q08170	392	Q08170_K392	52.009	DSK(1)AGSSK(1)K(1)K	1	-0.45032	0	0	0	0	0	0	0	988.094	2571.71
sp|Q08170|SRSF4_HUMAN Serine/arginine-rich splicing factor 4 OS=Homo sapiens OX=9606 GN=SRSF4 PE=1 SV=2	Q08170	393	Q08170_K393	52.009	DSK(1)AGSSK(1)K(1)K	1	-0.45032	0	0	0	0	0	0	0	988.094	2571.71
sp|Q08945|SSRP1_HUMAN FACT complex subunit SSRP1 OS=Homo sapiens OX=9606 GN=SSRP1 PE=1 SV=1	Q08945	632	Q08945_K632	45.908	K(1)VK(1)VK(1)MEK(1)K(1)STPSR	2	-0.32053	15763.1	11915.9	19971.5	25244.8	0	0	0	24458.9	0
sp|Q08945|SSRP1_HUMAN FACT complex subunit SSRP1 OS=Homo sapiens OX=9606 GN=SSRP1 PE=1 SV=1	Q08945	634	Q08945_K634	45.908	K(1)VK(1)VK(1)MEK(1)K(1)STPSR	2	-0.32053	15763.1	11915.9	19971.5	25244.8	0	0	0	24458.9	0
sp|Q08945|SSRP1_HUMAN FACT complex subunit SSRP1 OS=Homo sapiens OX=9606 GN=SSRP1 PE=1 SV=1	Q08945	636	Q08945_K636	45.908	K(1)VK(1)VK(1)MEK(1)K(1)STPSR	2	-0.32053	15763.1	11915.9	19971.5	25244.8	0	0	0	24458.9	0
sp|Q08945|SSRP1_HUMAN FACT complex subunit SSRP1 OS=Homo sapiens OX=9606 GN=SSRP1 PE=1 SV=1	Q08945	639	Q08945_K639	45.908	K(1)VK(1)VK(1)MEK(1)K(1)STPSR	2	-0.32053	15763.1	11915.9	19971.5	25244.8	0	0	0	24458.9	0
sp|Q08945|SSRP1_HUMAN FACT complex subunit SSRP1 OS=Homo sapiens OX=9606 GN=SSRP1 PE=1 SV=1	Q08945	640	Q08945_K640	45.908	K(1)VK(1)VK(1)MEK(1)K(1)STPSR	2	-0.32053	15763.1	11915.9	19971.5	25244.8	0	0	0	24458.9	0
sp|Q08945|SSRP1_HUMAN FACT complex subunit SSRP1 OS=Homo sapiens OX=9606 GN=SSRP1 PE=1 SV=1	Q08945	521	Q08945_K521	60.345	QLK(1)K(1)AK(1)MAK(1)DR	2	-0.40111	0	0	0	11377	8970.9	28262	0	13892.9	8368.38
sp|Q08945|SSRP1_HUMAN FACT complex subunit SSRP1 OS=Homo sapiens OX=9606 GN=SSRP1 PE=1 SV=1	Q08945	522	Q08945_K522	60.345	QLK(1)K(1)AK(1)MAK(1)DR	2	-0.40111	0	0	0	11377	8970.9	28262	0	13892.9	8368.38
sp|Q08945|SSRP1_HUMAN FACT complex subunit SSRP1 OS=Homo sapiens OX=9606 GN=SSRP1 PE=1 SV=1	Q08945	524	Q08945_K524	60.345	QLK(1)K(1)AK(1)MAK(1)DR	2	-0.40111	0	0	0	11377	8970.9	28262	0	13892.9	8368.38
sp|Q08945|SSRP1_HUMAN FACT complex subunit SSRP1 OS=Homo sapiens OX=9606 GN=SSRP1 PE=1 SV=1	Q08945	527	Q08945_K527	60.345	QLK(1)K(1)AK(1)MAK(1)DR	2	-0.40111	0	0	0	11377	8970.9	28262	0	13892.9	8368.38
sp|Q09666|AHNK_HUMAN Neuroblast differentiation-associated protein AHNAK OS=Homo sapiens OX=9606 GN=AHNAK PE=1 SV=2	Q09666	2101	Q09666_K2101	40.142	LK(0.547)GPK(0.52)LK(0.926)MPEMHFK(0.004)APK(0.004)ISMPDVDLHLK	4	0.093639	6383.41	0	2142.84	1998.91	3504.59	0	0	7125.27	0
sp|Q09666|AHNK_HUMAN Neuroblast differentiation-associated protein AHNAK OS=Homo sapiens OX=9606 GN=AHNAK PE=1 SV=2	Q09666	2106	Q09666_K2106	40.142	LK(0.547)GPK(0.52)LK(0.926)MPEMHFK(0.004)APK(0.004)ISMPDVDLHLK	4	0.093639	6383.41	0	2142.84	1998.91	3504.59	0	0	7125.27	0
sp|Q09666|AHNK_HUMAN Neuroblast differentiation-associated protein AHNAK OS=Homo sapiens OX=9606 GN=AHNAK PE=1 SV=2	Q09666	2563	Q09666_K2563	54.501	LK(1)GPK(1)LK(0.991)MPEMNIK(0.01)APK	3	-3.9667	0	0	0	0	0	0	0	0	0
sp|Q09666|AHNK_HUMAN Neuroblast differentiation-associated protein AHNAK OS=Homo sapiens OX=9606 GN=AHNAK PE=1 SV=2	Q09666	2566	Q09666_K2566	54.501	LK(1)GPK(1)LK(0.991)MPEMNIK(0.01)APK	3	-3.9667	0	0	0	0	0	0	0	0	0
sp|Q09666|AHNK_HUMAN Neuroblast differentiation-associated protein AHNAK OS=Homo sapiens OX=9606 GN=AHNAK PE=1 SV=2	Q09666	2568	Q09666_K2568	54.501	LK(1)GPK(1)LK(0.991)MPEMNIK(0.01)APK	3	-3.9667	0	0	0	0	0	0	0	0	0
sp|Q12802|AKP13_HUMAN A-kinase anchor protein 13 OS=Homo sapiens OX=9606 GN=AKAP13 PE=1 SV=2	Q12802	2217	Q12802_K2217	45.577	SIMRMK(1)SGQMFAK(1)EDLK	2	-3.0612	0	0	0	0	0	0	0	0	0
sp|Q12802|AKP13_HUMAN A-kinase anchor protein 13 OS=Homo sapiens OX=9606 GN=AKAP13 PE=1 SV=2	Q12802	2224	Q12802_K2224	45.577	SIMRMK(1)SGQMFAK(1)EDLK	2	-3.0612	0	0	0	0	0	0	0	0	0
sp|Q12802|AKP13_HUMAN A-kinase anchor protein 13 OS=Homo sapiens OX=9606 GN=AKAP13 PE=1 SV=2	Q12802	1753	Q12802_K1753	45.723	TFSYIK(0.905)NK(0.905)MSSSK(0.589)K(0.589)SK(0.011)EK	3	1.6891	0	0	0	0	1288.04	0	0	0	9485.99
sp|Q12802|AKP13_HUMAN A-kinase anchor protein 13 OS=Homo sapiens OX=9606 GN=AKAP13 PE=1 SV=2	Q12802	1755	Q12802_K1755	45.723	TFSYIK(0.905)NK(0.905)MSSSK(0.589)K(0.589)SK(0.011)EK	3	1.6891	0	0	0	0	1288.04	0	0	0	9485.99
sp|Q12802|AKP13_HUMAN A-kinase anchor protein 13 OS=Homo sapiens OX=9606 GN=AKAP13 PE=1 SV=2	Q12802	1760	Q12802_K1760	45.723	TFSYIK(0.905)NK(0.905)MSSSK(0.589)K(0.589)SK(0.011)EK	3	1.6891	0	0	0	0	1288.04	0	0	0	9485.99
sp|Q12802|AKP13_HUMAN A-kinase anchor protein 13 OS=Homo sapiens OX=9606 GN=AKAP13 PE=1 SV=2	Q12802	1761	Q12802_K1761	45.723	TFSYIK(0.905)NK(0.905)MSSSK(0.589)K(0.589)SK(0.011)EK	3	1.6891	0	0	0	0	1288.04	0	0	0	9485.99
sp|Q12872|SFSWA_HUMAN Splicing factor, suppressor of white-apricot homolog OS=Homo sapiens OX=9606 GN=SFSWAP PE=1 SV=3	Q12872	557	Q12872_K557	82.417	AGSGGK(0.5)K(0.5)EASSSK	2	0.2396	0	0	0	5666.87	6087.04	0	0	0	3407.91
sp|Q12872|SFSWA_HUMAN Splicing factor, suppressor of white-apricot homolog OS=Homo sapiens OX=9606 GN=SFSWAP PE=1 SV=3	Q12872	558	Q12872_K558	82.417	AGSGGK(0.5)K(0.5)EASSSK	2	0.2396	0	0	0	5666.87	6087.04	0	0	0	3407.91
sp|Q12955|ANK3_HUMAN Ankyrin-3 OS=Homo sapiens OX=9606 GN=ANK3 PE=1 SV=3	Q12955	3916	Q12955_K3916	44.683	IPVK(0.999)NTHRDNIIAVRK(0.982)ACATQK(0.236)QGQPEK(0.783)GK	4	1.1719	5577.47	0	8530.87	12210.6	12922.9	32798.6	0	9250.05	0
sp|Q12955|ANK3_HUMAN Ankyrin-3 OS=Homo sapiens OX=9606 GN=ANK3 PE=1 SV=3	Q12955	3928	Q12955_K3928	44.683	IPVK(0.999)NTHRDNIIAVRK(0.982)ACATQK(0.236)QGQPEK(0.783)GK	4	1.1719	5577.47	0	8530.87	12210.6	12922.9	32798.6	0	9250.05	0
sp|Q12955|ANK3_HUMAN Ankyrin-3 OS=Homo sapiens OX=9606 GN=ANK3 PE=1 SV=3	Q12955	3940	Q12955_K3940	44.683	IPVK(0.999)NTHRDNIIAVRK(0.982)ACATQK(0.236)QGQPEK(0.783)GK	4	1.1719	5577.47	0	8530.87	12210.6	12922.9	32798.6	0	9250.05	0
sp|Q13061|TRDN_HUMAN Triadin OS=Homo sapiens OX=9606 GN=TRDN PE=1 SV=4	Q13061	199	Q13061_K199	96.948	PETK(1)TLAK(1)EQK(1)K	2	0.15052	0	0	0	0	0	0	4477.57	0	0
sp|Q13061|TRDN_HUMAN Triadin OS=Homo sapiens OX=9606 GN=TRDN PE=1 SV=4	Q13061	203	Q13061_K203	96.948	PETK(1)TLAK(1)EQK(1)K	2	0.15052	0	0	0	0	0	0	4477.57	0	0
sp|Q13061|TRDN_HUMAN Triadin OS=Homo sapiens OX=9606 GN=TRDN PE=1 SV=4	Q13061	206	Q13061_K206	96.948	PETK(1)TLAK(1)EQK(1)K	2	0.15052	0	0	0	0	0	0	4477.57	0	0
sp|Q13061|TRDN_HUMAN Triadin OS=Homo sapiens OX=9606 GN=TRDN PE=1 SV=4	Q13061	246	Q13061_K246	61.419	TPSK(0.605)PK(0.197)EK(0.197)EDKEK	3	-4.2994	0	0	0	0	0	0	0	0	0
sp|Q13123|RED_HUMAN Protein Red OS=Homo sapiens OX=9606 GN=IK PE=1 SV=3	Q13123	54	Q13123_K54	66.023	AAPTSAPPSK(1)SR	2	0.055736	0	0	0	3554.91	4521.81	3255.74	0	14177.1	8381.43
sp|Q13123|RED_HUMAN Protein Red OS=Homo sapiens OX=9606 GN=IK PE=1 SV=3	Q13123	501	Q13123_K501	91.093	EALPK(1)AAFQYGIK	2	0.56691	0	0	0	20266	25415.5	30890.4	24300.1	0	0
sp|Q13123|RED_HUMAN Protein Red OS=Homo sapiens OX=9606 GN=IK PE=1 SV=3	Q13123	331	Q13123_K331	63.479	KPPEADMNIFEDIGDYVPSTTK(1)TPR	3	0.2354	0	0	0	44566.2	43033	28221	30535.8	42382.2	0
sp|Q13185|CBX3_HUMAN Chromobox protein homolog 3 OS=Homo sapiens OX=9606 GN=CBX3 PE=1 SV=4	Q13185	5	Q13185_K5	94.309	ASNK(1)TTLQK	2	-0.75336	0	0	0	16986.4	23903.2	11158.6	14573.1	44938.5	56577.8
sp|Q13185|CBX3_HUMAN Chromobox protein homolog 3 OS=Homo sapiens OX=9606 GN=CBX3 PE=1 SV=4	Q13185	21	Q13185_K21	94.023	SK(0.122)K(0.878)VEEAEPEEFVVEK	2	-0.14883	1644.07	0	1364.7	9210.16	0	0	0	12605.5	0
sp|Q13203|MYBPH_HUMAN Myosin-binding protein H OS=Homo sapiens OX=9606 GN=MYBPH PE=1 SV=4	Q13203	410	Q13203_K410	50.207	ASPK(1)PK(1)IIWMK	3	2.4808	0	0	0	0	0	0	0	0	0
sp|Q13203|MYBPH_HUMAN Myosin-binding protein H OS=Homo sapiens OX=9606 GN=MYBPH PE=1 SV=4	Q13203	412	Q13203_K412	50.207	ASPK(1)PK(1)IIWMK	3	2.4808	0	0	0	0	0	0	0	0	0
sp|Q13206|DDX10_HUMAN Probable ATP-dependent RNA helicase DDX10 OS=Homo sapiens OX=9606 GN=DDX10 PE=1 SV=2	Q13206	3	Q13206_K3	79.886	GK(1)TANSPGSGARPDPVR	2	-0.026952	0	0	0	0	0	0	0	0	0
sp|Q13416|ORC2_HUMAN Origin recognition complex subunit 2 OS=Homo sapiens OX=9606 GN=ORC2 PE=1 SV=2	Q13416	47	Q13416_K47	104.75	AQLLVNPK(1)K	1	0.073703	0	0	0	3570.72	3137.66	3523.89	0	4874.99	5438.71
sp|Q13428|TCOF_HUMAN Treacle protein OS=Homo sapiens OX=9606 GN=TCOF1 PE=1 SV=3	Q13428	1437	Q13428_K1437	184.55	GMGTVEGGDQSNPK(1)SK	2	-0.43921	2601.46	3385.66	3954.25	19939.1	15470.1	11312.8	14350.7	11756.8	11240.1
sp|Q13428|TCOF_HUMAN Treacle protein OS=Homo sapiens OX=9606 GN=TCOF1 PE=1 SV=3	Q13428	155	Q13428_K155	87.568	TVANLLSGK(1)SPR	2	-0.19915	0	0	0	0	0	5190.16	5184.15	7176.48	0
sp|Q13439|GOGA4_HUMAN Golgin subfamily A member 4 OS=Homo sapiens OX=9606 GN=GOLGA4 PE=1 SV=1	Q13439	958	Q13439_K958	54.768	MEK(1)VK(1)QK(1)AK(1)EMQETLK	2	4.1856	0	0	0	0	0	0	0	0	0
sp|Q13439|GOGA4_HUMAN Golgin subfamily A member 4 OS=Homo sapiens OX=9606 GN=GOLGA4 PE=1 SV=1	Q13439	960	Q13439_K960	54.768	MEK(1)VK(1)QK(1)AK(1)EMQETLK	2	4.1856	0	0	0	0	0	0	0	0	0
sp|Q13439|GOGA4_HUMAN Golgin subfamily A member 4 OS=Homo sapiens OX=9606 GN=GOLGA4 PE=1 SV=1	Q13439	962	Q13439_K962	54.768	MEK(1)VK(1)QK(1)AK(1)EMQETLK	2	4.1856	0	0	0	0	0	0	0	0	0
sp|Q13439|GOGA4_HUMAN Golgin subfamily A member 4 OS=Homo sapiens OX=9606 GN=GOLGA4 PE=1 SV=1	Q13439	964	Q13439_K964	54.768	MEK(1)VK(1)QK(1)AK(1)EMQETLK	2	4.1856	0	0	0	0	0	0	0	0	0
sp|Q13442|HAP28_HUMAN 28 kDa heat- and acid-stable phosphoprotein OS=Homo sapiens OX=9606 GN=PDAP1 PE=1 SV=1	Q13442	52	Q13442_K52	109.14	AREEEEQKEGGDGAAGDPK(1)K	2	-1.0163	0	0	0	852.693	0	0	0	0	1087.52
sp|Q13442|HAP28_HUMAN 28 kDa heat- and acid-stable phosphoprotein OS=Homo sapiens OX=9606 GN=PDAP1 PE=1 SV=1	Q13442	105	Q13442_K105	102.4	VTQLDLDGPK(1)ELSR	2	-0.02763	0	0	0	9834.97	7561.19	0	0	19485.7	14753.4
sp|Q13573|SNW1_HUMAN SNW domain-containing protein 1 OS=Homo sapiens OX=9606 GN=SNW1 PE=1 SV=1	Q13573	339	Q13573_K339	118.19	AGIK(1)THVEKEDGEAR	2	-0.11094	0	0	0	1144.8	6990.97	2700.86	0	0	0
sp|Q13618|CUL3_HUMAN Cullin-3 OS=Homo sapiens OX=9606 GN=CUL3 PE=1 SV=2	Q13618	289	Q13618_K289	49.087	HMKTIVEMENSGLVHMLK(1)NGK(1)TEDLGCMYK(1)LFSR	3	4.226	0	0	0	0	0	0	0	0	0
sp|Q13618|CUL3_HUMAN Cullin-3 OS=Homo sapiens OX=9606 GN=CUL3 PE=1 SV=2	Q13618	292	Q13618_K292	49.087	HMKTIVEMENSGLVHMLK(1)NGK(1)TEDLGCMYK(1)LFSR	3	4.226	0	0	0	0	0	0	0	0	0
sp|Q13618|CUL3_HUMAN Cullin-3 OS=Homo sapiens OX=9606 GN=CUL3 PE=1 SV=2	Q13618	301	Q13618_K301	49.087	HMKTIVEMENSGLVHMLK(1)NGK(1)TEDLGCMYK(1)LFSR	3	4.226	0	0	0	0	0	0	0	0	0
sp|Q13618|CUL3_HUMAN Cullin-3 OS=Homo sapiens OX=9606 GN=CUL3 PE=1 SV=2	Q13618	15	Q13618_K15	42.242	SNLSK(0.002)GTGSRK(0.199)DTK(0.798)MR	3	0.26671	0	0	0	0	4490.49	2626.24	0	0	6498.37
sp|Q13823|NOG2_HUMAN Nucleolar GTP-binding protein 2 OS=Homo sapiens OX=9606 GN=GNL2 PE=1 SV=1	Q13823	672	Q13823_K672	119.34	EEEQEHSNK(1)APR	2	0.1677	0	0	0	394.38	275.229	0	427.611	0	323.661
sp|Q14008|CKAP5_HUMAN Cytoskeleton-associated protein 5 OS=Homo sapiens OX=9606 GN=CKAP5 PE=1 SV=3	Q14008	511	Q14008_K511	47.621	AGLAADK(0.987)K(0.022)EFK(0.99)PLPGR	4	-0.97666	0	0	0	190.787	412.258	504.204	0	258.722	0
sp|Q14008|CKAP5_HUMAN Cytoskeleton-associated protein 5 OS=Homo sapiens OX=9606 GN=CKAP5 PE=1 SV=3	Q14008	515	Q14008_K515	47.621	AGLAADK(0.987)K(0.022)EFK(0.99)PLPGR	4	-0.97666	0	0	0	190.787	412.258	504.204	0	258.722	0
sp|Q14141|SEPT6_HUMAN Septin-6 OS=Homo sapiens OX=9606 GN=SEPTIN6 PE=1 SV=4	Q14141	420	Q14141_K420	122.34	TAAELLQSQGSQAGGSQTLK(1)R	2	-0.90855	0	0	0	0	9838.12	5218.1	2592.34	12590.4	0
sp|Q14149|MORC3_HUMAN MORC family CW-type zinc finger protein 3 OS=Homo sapiens OX=9606 GN=MORC3 PE=1 SV=3	Q14149	505	Q14149_K505	108.72	PTALSTPSFSSPK(1)ESVPR	2	0.55749	0	0	0	5054.32	5958.52	6676.45	6230.43	7205.44	7623.31
sp|Q14151|SAFB2_HUMAN Scaffold attachment factor B2 OS=Homo sapiens OX=9606 GN=SAFB2 PE=1 SV=1	Q14151	586	Q14151_K586	105.19	SKGEPVISVK(1)TTSR	2	0.095284	0	0	0	18421.6	11386.1	0	1355.75	16435.8	27295.8
sp|Q14241|ELOA1_HUMAN Elongin-A OS=Homo sapiens OX=9606 GN=ELOA PE=1 SV=3	Q14241	760	Q14241_K760	59.185	IAPMMAK(1)TIK(1)AFK	2	-0.11395	0	0	0	26293.4	30722.5	40098.3	28800.4	36241.7	36928.9
sp|Q14241|ELOA1_HUMAN Elongin-A OS=Homo sapiens OX=9606 GN=ELOA PE=1 SV=3	Q14241	763	Q14241_K763	59.185	IAPMMAK(1)TIK(1)AFK	2	-0.11395	0	0	0	26293.4	30722.5	40098.3	28800.4	36241.7	36928.9
sp|Q14320|FA50A_HUMAN Protein FAM50A OS=Homo sapiens OX=9606 GN=FAM50A PE=1 SV=2	Q14320	5	Q14320_K5	88.056	AQYK(1)GAASEAGR	2	-0.17078	0	0	0	0	20826.4	0	26003	22772.7	0
sp|Q14498|RBM39_HUMAN RNA-binding protein 39 OS=Homo sapiens OX=9606 GN=RBM39 PE=1 SV=2	Q14498	119	Q14498_K119	108.47	IGLPHSIK(1)LSR	3	-0.30395	0	587.823	0	67593.2	35132.7	36036.3	8919.69	23810.4	22051
sp|Q14498|RBM39_HUMAN RNA-binding protein 39 OS=Homo sapiens OX=9606 GN=RBM39 PE=1 SV=2	Q14498	103	Q14498_K103	180.66	SPYSGPK(1)FNSAIR	2	0.35135	9051.59	10539.7	11979.5	50217.3	63829.5	55497.4	15049.9	34170.2	29784.1
sp|Q14573|ITPR3_HUMAN Inositol 1,4,5-trisphosphate receptor type 3 OS=Homo sapiens OX=9606 GN=ITPR3 PE=1 SV=2	Q14573	92	Q14573_K92	40.986	IADVVLLQK(0.995)LQHAAQMEQK(0.976)QNDTENK(0.029)K	4	-0.73474	5154.15	7485.19	0	1663.46	12179.8	11936.9	10778.9	0	0
sp|Q14573|ITPR3_HUMAN Inositol 1,4,5-trisphosphate receptor type 3 OS=Homo sapiens OX=9606 GN=ITPR3 PE=1 SV=2	Q14573	102	Q14573_K102	40.986	IADVVLLQK(0.995)LQHAAQMEQK(0.976)QNDTENK(0.029)K	4	-0.73474	5154.15	7485.19	0	1663.46	12179.8	11936.9	10778.9	0	0
sp|Q14667|BLTP2_HUMAN Bridge-like lipid transfer protein family member 2 OS=Homo sapiens OX=9606 GN=BLTP2 PE=1 SV=3	Q14667	1489	Q14667_K1489	50.499	NLSTEALK(0.998)GLK(0.998)IDPQMPAK(0.738)K(0.143)PK(0.124)R	3	-0.0090698	2317.07	1251.7	2309.99	2638.44	1993.76	1925.38	1449.96	0	2006.06
sp|Q14667|BLTP2_HUMAN Bridge-like lipid transfer protein family member 2 OS=Homo sapiens OX=9606 GN=BLTP2 PE=1 SV=3	Q14667	1492	Q14667_K1492	50.499	NLSTEALK(0.998)GLK(0.998)IDPQMPAK(0.738)K(0.143)PK(0.124)R	3	-0.0090698	2317.07	1251.7	2309.99	2638.44	1993.76	1925.38	1449.96	0	2006.06
sp|Q14667|BLTP2_HUMAN Bridge-like lipid transfer protein family member 2 OS=Homo sapiens OX=9606 GN=BLTP2 PE=1 SV=3	Q14667	1500	Q14667_K1500	50.499	NLSTEALK(0.998)GLK(0.998)IDPQMPAK(0.738)K(0.143)PK(0.124)R	3	-0.0090698	2317.07	1251.7	2309.99	2638.44	1993.76	1925.38	1449.96	0	2006.06
sp|Q14738|2A5D_HUMAN Serine/threonine-protein phosphatase 2A 56 kDa regulatory subunit delta isoform OS=Homo sapiens OX=9606 GN=PPP2R5D PE=1 SV=1	Q14738	4	Q14738_K4	49.216	MPYK(1)LK(1)K(1)EK(1)EPPK	2	1.4375	0	0	0	0	0	0	0	0	0
sp|Q14738|2A5D_HUMAN Serine/threonine-protein phosphatase 2A 56 kDa regulatory subunit delta isoform OS=Homo sapiens OX=9606 GN=PPP2R5D PE=1 SV=1	Q14738	6	Q14738_K6	49.216	MPYK(1)LK(1)K(1)EK(1)EPPK	2	1.4375	0	0	0	0	0	0	0	0	0
sp|Q14738|2A5D_HUMAN Serine/threonine-protein phosphatase 2A 56 kDa regulatory subunit delta isoform OS=Homo sapiens OX=9606 GN=PPP2R5D PE=1 SV=1	Q14738	7	Q14738_K7	49.216	MPYK(1)LK(1)K(1)EK(1)EPPK	2	1.4375	0	0	0	0	0	0	0	0	0
sp|Q14738|2A5D_HUMAN Serine/threonine-protein phosphatase 2A 56 kDa regulatory subunit delta isoform OS=Homo sapiens OX=9606 GN=PPP2R5D PE=1 SV=1	Q14738	9	Q14738_K9	49.216	MPYK(1)LK(1)K(1)EK(1)EPPK	2	1.4375	0	0	0	0	0	0	0	0	0
sp|Q14839|CHD4_HUMAN Chromodomain-helicase-DNA-binding protein 4 OS=Homo sapiens OX=9606 GN=CHD4 PE=1 SV=2	Q14839	64	Q14839_K64	103.43	DPK(1)IPK(1)SK	1	-0.37594	0	0	0	10782.5	9854.67	10540.5	5094.4	15370.9	6629.24
sp|Q14839|CHD4_HUMAN Chromodomain-helicase-DNA-binding protein 4 OS=Homo sapiens OX=9606 GN=CHD4 PE=1 SV=2	Q14839	67	Q14839_K67	103.43	DPK(1)IPK(1)SK	1	-0.37594	0	0	0	10782.5	9854.67	10540.5	5094.4	15370.9	6629.24
sp|Q14966|ZN638_HUMAN Zinc finger protein 638 OS=Homo sapiens OX=9606 GN=ZNF638 PE=1 SV=2	Q14966	1435	Q14966_K1435	72.815	LSAK(1)EFGLLKPTSAR	3	-0.11535	0	0	0	21479.5	6814.22	6292.65	7559.08	6335.3	12794.9
sp|Q14978|NOLC1_HUMAN Nucleolar and coiled-body phosphoprotein 1 OS=Homo sapiens OX=9606 GN=NOLC1 PE=1 SV=2	Q14978	255	Q14978_K255	122.18	QVVAK(1)APVK(1)AATTPTR	2	-0.10053	2253.59	1579.02	2855.35	0	7762.78	53909.1	7148.45	130744	18201.1
sp|Q14978|NOLC1_HUMAN Nucleolar and coiled-body phosphoprotein 1 OS=Homo sapiens OX=9606 GN=NOLC1 PE=1 SV=2	Q14978	347	Q14978_K347	73.887	AVVSK(0.998)ATTK(0.002)PPPAK	2	0.32952	0	0	0	5082.4	4738.16	2010.06	1299.28	9013.73	0
sp|Q14978|NOLC1_HUMAN Nucleolar and coiled-body phosphoprotein 1 OS=Homo sapiens OX=9606 GN=NOLC1 PE=1 SV=2	Q14978	601	Q14978_K601	117.71	EAETPQAK(1)K	2	-0.82523	0	0	0	0	0	0	10610.4	0	0
sp|Q14978|NOLC1_HUMAN Nucleolar and coiled-body phosphoprotein 1 OS=Homo sapiens OX=9606 GN=NOLC1 PE=1 SV=2	Q14978	155	Q14978_K155	84.173	GVKPQAK(1)AAK(1)APPK(1)K	2	-0.073271	0	0	0	7078.18	7096.81	3855.29	0	10477.4	0
sp|Q14978|NOLC1_HUMAN Nucleolar and coiled-body phosphoprotein 1 OS=Homo sapiens OX=9606 GN=NOLC1 PE=1 SV=2	Q14978	158	Q14978_K158	84.173	GVKPQAK(1)AAK(1)APPK(1)K	2	-0.073271	0	0	0	7078.18	7096.81	3855.29	0	10477.4	0
sp|Q14978|NOLC1_HUMAN Nucleolar and coiled-body phosphoprotein 1 OS=Homo sapiens OX=9606 GN=NOLC1 PE=1 SV=2	Q14978	162	Q14978_K162	84.173	GVKPQAK(1)AAK(1)APPK(1)K	2	-0.073271	0	0	0	7078.18	7096.81	3855.29	0	10477.4	0
sp|Q14978|NOLC1_HUMAN Nucleolar and coiled-body phosphoprotein 1 OS=Homo sapiens OX=9606 GN=NOLC1 PE=1 SV=2	Q14978	193	Q14978_K193	145.23	ITPVTVK(1)AQTK	2	0.31884	0	322.396	0	72372.9	1653.89	93271.9	0	130719	121157
sp|Q14978|NOLC1_HUMAN Nucleolar and coiled-body phosphoprotein 1 OS=Homo sapiens OX=9606 GN=NOLC1 PE=1 SV=2	Q14978	492	Q14978_K492	52.498	K(0.414)K(0.414)PQK(0.172)VAGGAAPSK(0.049)PASAK(0.951)K	3	-0.19098	0	0	0	0	0	0	0	0	0
sp|Q14978|NOLC1_HUMAN Nucleolar and coiled-body phosphoprotein 1 OS=Homo sapiens OX=9606 GN=NOLC1 PE=1 SV=2	Q14978	493	Q14978_K493	52.498	K(0.414)K(0.414)PQK(0.172)VAGGAAPSK(0.049)PASAK(0.951)K	3	-0.19098	0	0	0	0	0	0	0	0	0
sp|Q14978|NOLC1_HUMAN Nucleolar and coiled-body phosphoprotein 1 OS=Homo sapiens OX=9606 GN=NOLC1 PE=1 SV=2	Q14978	496	Q14978_K496	144.4	KKPQK(1)VAGGAAPSKPASAK	2	-0.71654	0	0	464.447	17820.4	2885.95	1902.79	0	14685.4	12881.2
sp|Q14978|NOLC1_HUMAN Nucleolar and coiled-body phosphoprotein 1 OS=Homo sapiens OX=9606 GN=NOLC1 PE=1 SV=2	Q14978	510	Q14978_K510	103.46	VAGGAAPSKPASAK(1)K	3	0.080086	1089.32	910.64	1688.04	93957.3	102557	43444	20389	112888	115789
sp|Q14978|NOLC1_HUMAN Nucleolar and coiled-body phosphoprotein 1 OS=Homo sapiens OX=9606 GN=NOLC1 PE=1 SV=2	Q14978	511	Q14978_K511	77.469	VAGGAAPSK(0.002)PASAK(0.998)K(0.999)GK	2	-0.046892	0	0	0	36920.7	37640.4	20707.5	20389	44313.1	47636.9
sp|Q14978|NOLC1_HUMAN Nucleolar and coiled-body phosphoprotein 1 OS=Homo sapiens OX=9606 GN=NOLC1 PE=1 SV=2	Q14978	76	Q14978_K76	145.14	LQANGPVAK(1)K(1)AK	2	-0.38506	582.166	1560.62	0	90930.1	115693	68357.5	56757.7	88668.2	106721
sp|Q14978|NOLC1_HUMAN Nucleolar and coiled-body phosphoprotein 1 OS=Homo sapiens OX=9606 GN=NOLC1 PE=1 SV=2	Q14978	77	Q14978_K77	145.14	LQANGPVAK(1)K(1)AK	2	-0.38506	582.166	849.136	0	62061.6	88636.3	56638.5	51688.2	88668.2	78824.9
sp|Q14978|NOLC1_HUMAN Nucleolar and coiled-body phosphoprotein 1 OS=Homo sapiens OX=9606 GN=NOLC1 PE=1 SV=2	Q14978	246	Q14978_K246	66.267	TVPK(1)K(1)QVVAK	1	-0.53654	0	0	0	0	5273.83	5338.74	2999.77	0	0
sp|Q14978|NOLC1_HUMAN Nucleolar and coiled-body phosphoprotein 1 OS=Homo sapiens OX=9606 GN=NOLC1 PE=1 SV=2	Q14978	251	Q14978_K251	95.815	QVVAK(1)APVK(1)AATTPTR	2	-0.10053	235.737	0	0	0	7762.78	8847.91	6782.9	15949.3	27757.8
sp|Q14978|NOLC1_HUMAN Nucleolar and coiled-body phosphoprotein 1 OS=Homo sapiens OX=9606 GN=NOLC1 PE=1 SV=2	Q14978	613	Q14978_K613	171.73	LQTPNTFPK(1)RK	3	-0.23594	18614.1	12016	16058.4	517664	472808	492327	418229	810077	656556
sp|Q14978|NOLC1_HUMAN Nucleolar and coiled-body phosphoprotein 1 OS=Homo sapiens OX=9606 GN=NOLC1 PE=1 SV=2	Q14978	448	Q14978_K448	80.706	MVATTK(0.019)PK(0.985)ATAK(0.996)AALSLPAK	3	0.094327	0	0	0	0	11154.6	11738.5	11078.4	14724	13024.4
sp|Q14978|NOLC1_HUMAN Nucleolar and coiled-body phosphoprotein 1 OS=Homo sapiens OX=9606 GN=NOLC1 PE=1 SV=2	Q14978	452	Q14978_K452	53.327	MVATTK(0.019)PK(0.985)ATAK(0.996)AALSLPAK	3	0.094327	0	0	0	0	11154.6	11738.5	11078.4	14724	13024.4
sp|Q14978|NOLC1_HUMAN Nucleolar and coiled-body phosphoprotein 1 OS=Homo sapiens OX=9606 GN=NOLC1 PE=1 SV=2	Q14978	301	Q14978_K301	66.137	NKPGPYSSVPPPSAPPPK(1)K	3	0.17766	0	0	0	8523.71	0	2457.86	2813.24	9047.73	4056.51
sp|Q14978|NOLC1_HUMAN Nucleolar and coiled-body phosphoprotein 1 OS=Homo sapiens OX=9606 GN=NOLC1 PE=1 SV=2	Q14978	407	Q14978_K407	140.91	PAAAPK(1)QPVGGGQK	2	0.21119	0	0	0	5948.62	7137.48	3698.41	5873.21	13373.7	12541.7
sp|Q14978|NOLC1_HUMAN Nucleolar and coiled-body phosphoprotein 1 OS=Homo sapiens OX=9606 GN=NOLC1 PE=1 SV=2	Q14978	310	Q14978_K310	159	SLGTQPPK(1)K(1)AVEK	2	0.039579	0	0	0	250664	275657	269839	223936	429825	386355
sp|Q14978|NOLC1_HUMAN Nucleolar and coiled-body phosphoprotein 1 OS=Homo sapiens OX=9606 GN=NOLC1 PE=1 SV=2	Q14978	311	Q14978_K311	159	SLGTQPPK(1)K(1)AVEK	2	0.039579	0	0	0	250664	275657	269839	223936	429825	386355
sp|Q14978|NOLC1_HUMAN Nucleolar and coiled-body phosphoprotein 1 OS=Homo sapiens OX=9606 GN=NOLC1 PE=1 SV=2	Q14978	245	Q14978_K245	66.267	TVPK(1)K(1)QVVAK	1	-0.53654	0	0	0	0	5273.83	5338.74	2999.77	0	0
sp|Q15014|MO4L2_HUMAN Mortality factor 4-like protein 2 OS=Homo sapiens OX=9606 GN=MORF4L2 PE=1 SV=1	Q15014	41	Q15014_K41	93.243	GASSGK(1)K(1)TAGPQQK	2	-0.04709	0	0	0	5343.17	4955.96	0	1293.41	6668.16	5110.44
sp|Q15014|MO4L2_HUMAN Mortality factor 4-like protein 2 OS=Homo sapiens OX=9606 GN=MORF4L2 PE=1 SV=1	Q15014	42	Q15014_K42	93.243	GASSGK(1)K(1)TAGPQQK	2	-0.04709	0	0	0	5343.17	4955.96	0	1293.41	6668.16	5110.44
sp|Q15014|MO4L2_HUMAN Mortality factor 4-like protein 2 OS=Homo sapiens OX=9606 GN=MORF4L2 PE=1 SV=1	Q15014	22	Q15014_K22	85.77	GQQSAEEENFK(1)K(1)PTR	2	-0.39775	0	0	0	0	0	0	0	0	0
sp|Q15014|MO4L2_HUMAN Mortality factor 4-like protein 2 OS=Homo sapiens OX=9606 GN=MORF4L2 PE=1 SV=1	Q15014	23	Q15014_K23	85.77	GQQSAEEENFK(1)K(1)PTR	2	-0.39775	0	0	0	0	0	0	0	0	0
sp|Q15059|BRD3_HUMAN Bromodomain-containing protein 3 OS=Homo sapiens OX=9606 GN=BRD3 PE=1 SV=1	Q15059	487	Q15059_K487	84.829	AVHEQLAALSQAPVNK(0.5)PK(0.5)K	3	0.056073	4062.7	0	7790.3	16603.7	9030.66	0	0	0	0
sp|Q15059|BRD3_HUMAN Bromodomain-containing protein 3 OS=Homo sapiens OX=9606 GN=BRD3 PE=1 SV=1	Q15059	489	Q15059_K489	97.776	AVHEQLAALSQAPVNK(0.098)PK(0.902)K	3	0.0076332	786.796	3263.81	8886.88	22421.2	0	8800.4	2826.15	8570.89	6626.05
sp|Q15059|BRD3_HUMAN Bromodomain-containing protein 3 OS=Homo sapiens OX=9606 GN=BRD3 PE=1 SV=1	Q15059	683	Q15059_K683	85.619	LQDVSGQLSSSK(1)K(1)PAR	2	-0.62993	0	0	0	1959.67	0	1742.85	1599.72	3823.76	0
sp|Q15059|BRD3_HUMAN Bromodomain-containing protein 3 OS=Homo sapiens OX=9606 GN=BRD3 PE=1 SV=1	Q15059	684	Q15059_K684	85.619	LQDVSGQLSSSK(1)K(1)PAR	2	-0.62993	0	0	0	1959.67	0	1742.85	1599.72	3823.76	0
sp|Q15233|NONO_HUMAN Non-POU domain-containing octamer-binding protein OS=Homo sapiens OX=9606 GN=NONO PE=1 SV=4	Q15233	5	Q15233_K5	123.84	MQSNK(1)TFNLEK	2	0.60419	0	0	0	87376.8	61428.4	152547	189675	259943	176404
sp|Q15413|RYR3_HUMAN Ryanodine receptor 3 OS=Homo sapiens OX=9606 GN=RYR3 PE=1 SV=3	Q15413	3337	Q15413_K3337	50.188	SK(0.208)MSK(0.789)AMQVK(0.003)SGGQDQER	2	-0.29572	0	1912.79	5530.02	5920.22	0	6356.93	1523.2	0	0
sp|Q15424|SAFB1_HUMAN Scaffold attachment factor B1 OS=Homo sapiens OX=9606 GN=SAFB PE=1 SV=4	Q15424	578	Q15424_K578	120.6	GVPVISVK(1)TSGSK	2	0.75239	0	0	0	25344.6	18695.3	0	22053.4	50668.1	53381
sp|Q15555|MARE2_HUMAN Microtubule-associated protein RP/EB family member 2 OS=Homo sapiens OX=9606 GN=MAPRE2 PE=1 SV=1	Q15555	225	Q15555_K225	52.72	PGSTPSRPSSAK(1)RASSSGSASK	3	1.0429	0	0	0	0	0	0	0	7158.85	0
sp|Q155Q3|DIXC1_HUMAN Dixin OS=Homo sapiens OX=9606 GN=DIXDC1 PE=1 SV=2	Q155Q3	558	Q155Q3_K558	54.974	LHVMETQK(0.997)K(0.962)QERK(0.04)VRVK(0.001)SPR	3	2.1957	0	0	0	0	0	0	0	0	0
sp|Q155Q3|DIXC1_HUMAN Dixin OS=Homo sapiens OX=9606 GN=DIXDC1 PE=1 SV=2	Q155Q3	559	Q155Q3_K559	54.974	LHVMETQK(0.997)K(0.962)QERK(0.04)VRVK(0.001)SPR	3	2.1957	0	0	0	0	0	0	0	0	0
sp|Q15651|HMGN3_HUMAN High mobility group nucleosome-binding domain-containing protein 3 OS=Homo sapiens OX=9606 GN=HMGN3 PE=1 SV=2	Q15651	17	Q15651_K17	117.7	DGSK(1)VTK(1)QEPTR	2	0.90047	0	0	0	4135.83	5314.14	4394.84	12764.7	17888.9	18827.7
sp|Q15651|HMGN3_HUMAN High mobility group nucleosome-binding domain-containing protein 3 OS=Homo sapiens OX=9606 GN=HMGN3 PE=1 SV=2	Q15651	20	Q15651_K20	117.7	DGSK(1)VTK(1)QEPTR	2	0.90047	0	0	0	4135.83	5314.14	4394.84	12192.5	17400.4	18827.7
sp|Q15651|HMGN3_HUMAN High mobility group nucleosome-binding domain-containing protein 3 OS=Homo sapiens OX=9606 GN=HMGN3 PE=1 SV=2	Q15651	42	Q15651_K42	106.26	PAPPKPEPK(1)PR	3	-0.88631	0	0	0	30025.8	26076.5	18662.3	50493.1	98578.5	0
sp|Q15695|U2AFL_HUMAN U2 small nuclear ribonucleoprotein auxiliary factor 35 kDa subunit-related protein 1 OS=Homo sapiens OX=9606 GN=ZRSR2P1 PE=1 SV=2	Q15695	6	Q15695_K6	65.465	AALEK(1)MTFPKK	2	0.56469	0	0	0	0	0	0	0	0	0
sp|Q15835|GRK1_HUMAN Rhodopsin kinase GRK1 OS=Homo sapiens OX=9606 GN=GRK1 PE=1 SV=1	Q15835	227	Q15835_K227	48.659	LK(0.784)K(0.182)RK(0.034)GYQGAMVEK(0.208)K(0.792)ILMK	2	-1.2614	0	0	0	0	0	0	0	0	0
sp|Q15835|GRK1_HUMAN Rhodopsin kinase GRK1 OS=Homo sapiens OX=9606 GN=GRK1 PE=1 SV=1	Q15835	240	Q15835_K240	48.659	LK(0.784)K(0.182)RK(0.034)GYQGAMVEK(0.208)K(0.792)ILMK	2	-1.2614	0	0	0	0	0	0	0	0	0
sp|Q16048|MCHL1_HUMAN Putative pro-MCH-like protein 1 OS=Homo sapiens OX=9606 GN=PMCHL1 PE=5 SV=2	Q16048	5	Q16048_K5	113.7	LSQK(1)PK(0.007)K(0.993)K	2	-0.1715	0	0	0	13739.4	0	18223.1	18753.5	68675.4	0
sp|Q16048|MCHL1_HUMAN Putative pro-MCH-like protein 1 OS=Homo sapiens OX=9606 GN=PMCHL1 PE=5 SV=2	Q16048	8	Q16048_K8	113.7	LSQK(1)PK(0.006)K(0.995)K	2	-0.12348	0	0	0	13739.4	0	18223.1	18753.5	68675.4	0
sp|Q16763|UBE2S_HUMAN Ubiquitin-conjugating enzyme E2 S OS=Homo sapiens OX=9606 GN=UBE2S PE=1 SV=2	Q16763	197	Q16763_K197	117.55	ALASGTEASSTDPGAPGGPGGAEGPMAK(1)K(1)HAGER	2	-1.0171	0	0	0	3801.15	20034.1	12418.6	10448.4	39628.7	0
sp|Q16763|UBE2S_HUMAN Ubiquitin-conjugating enzyme E2 S OS=Homo sapiens OX=9606 GN=UBE2S PE=1 SV=2	Q16763	198	Q16763_K198	117.55	ALASGTEASSTDPGAPGGPGGAEGPMAK(1)K(1)HAGER	2	-1.0171	0	0	0	0	15037.8	12418.6	10448.4	36889.4	0
sp|Q17RP2|TIGD6_HUMAN Tigger transposable element-derived protein 6 OS=Homo sapiens OX=9606 GN=TIGD6 PE=2 SV=2	Q17RP2	4	Q17RP2_K4	43.124	MANK(1)GNK(1)K(1)R	2	-0.19686	0	5265.78	6606.6	1483.25	934.961	11231.3	5741.87	6237.92	5872.07
sp|Q17RP2|TIGD6_HUMAN Tigger transposable element-derived protein 6 OS=Homo sapiens OX=9606 GN=TIGD6 PE=2 SV=2	Q17RP2	7	Q17RP2_K7	43.124	MANK(1)GNK(1)K(1)R	2	-0.19686	0	5265.78	6606.6	1483.25	934.961	11231.3	5741.87	6237.92	5872.07
sp|Q17RP2|TIGD6_HUMAN Tigger transposable element-derived protein 6 OS=Homo sapiens OX=9606 GN=TIGD6 PE=2 SV=2	Q17RP2	8	Q17RP2_K8	43.124	MANK(1)GNK(1)K(1)R	2	-0.19686	0	5265.78	6606.6	1483.25	934.961	11231.3	5741.87	6237.92	5872.07
sp|Q30KQ4|DB116_HUMAN Beta-defensin 116 OS=Homo sapiens OX=9606 GN=DEFB116 PE=3 SV=1	Q30KQ4	20	Q30KQ4_K20	43.554	SVMK(0.002)PCLMTIAILMILAQK(0.965)TPGGLFRSHNGK(0.033)SR	3	-0.23168	0	0	0	0	0	0	0	0	0
sp|Q32MQ0|ZN750_HUMAN Zinc finger protein 750 OS=Homo sapiens OX=9606 GN=ZNF750 PE=1 SV=1	Q32MQ0	5	Q32MQ0_K5	52.79	MSLLK(0.984)ERK(0.092)PK(0.924)K	3	1.2785	0	0	357.218	839.526	524.719	218.315	0	573.674	345.599
sp|Q32MQ0|ZN750_HUMAN Zinc finger protein 750 OS=Homo sapiens OX=9606 GN=ZNF750 PE=1 SV=1	Q32MQ0	10	Q32MQ0_K10	52.79	MSLLK(0.984)ERK(0.092)PK(0.924)K	3	1.2785	0	0	357.218	839.526	524.719	218.315	0	573.674	345.599
sp|Q32MZ4|LRRF1_HUMAN Leucine-rich repeat flightless-interacting protein 1 OS=Homo sapiens OX=9606 GN=LRRFIP1 PE=1 SV=2	Q32MZ4	572	Q32MZ4_K572	48.998	NK(1)K(1)K(1)K(1)NK(1)K(1)K	2	0.56561	0	0	0	2528.81	3253.64	0	0	7649.54	0
sp|Q32MZ4|LRRF1_HUMAN Leucine-rich repeat flightless-interacting protein 1 OS=Homo sapiens OX=9606 GN=LRRFIP1 PE=1 SV=2	Q32MZ4	573	Q32MZ4_K573	48.998	NK(1)K(1)K(1)K(1)NK(1)K(1)K	2	0.56561	0	0	0	2528.81	3253.64	0	0	7649.54	0
sp|Q32MZ4|LRRF1_HUMAN Leucine-rich repeat flightless-interacting protein 1 OS=Homo sapiens OX=9606 GN=LRRFIP1 PE=1 SV=2	Q32MZ4	574	Q32MZ4_K574	48.998	NK(1)K(1)K(1)K(1)NK(1)K(1)K	2	0.56561	0	0	0	2528.81	3253.64	0	0	7649.54	0
sp|Q32MZ4|LRRF1_HUMAN Leucine-rich repeat flightless-interacting protein 1 OS=Homo sapiens OX=9606 GN=LRRFIP1 PE=1 SV=2	Q32MZ4	575	Q32MZ4_K575	48.998	NK(1)K(1)K(1)K(1)NK(1)K(1)K	2	0.56561	0	0	0	2528.81	3253.64	0	0	7649.54	0
sp|Q32MZ4|LRRF1_HUMAN Leucine-rich repeat flightless-interacting protein 1 OS=Homo sapiens OX=9606 GN=LRRFIP1 PE=1 SV=2	Q32MZ4	577	Q32MZ4_K577	48.998	NK(1)K(1)K(1)K(1)NK(1)K(1)K	2	0.56561	0	0	0	2528.81	3253.64	0	0	7649.54	0
sp|Q32MZ4|LRRF1_HUMAN Leucine-rich repeat flightless-interacting protein 1 OS=Homo sapiens OX=9606 GN=LRRFIP1 PE=1 SV=2	Q32MZ4	578	Q32MZ4_K578	48.998	NK(1)K(1)K(1)K(1)NK(1)K(1)K	2	0.56561	0	0	0	2528.81	3253.64	0	0	7649.54	0
sp|Q32P51|RA1L2_HUMAN Heterogeneous nuclear ribonucleoprotein A1-like 2 OS=Homo sapiens OX=9606 GN=HNRNPA1L2 PE=2 SV=2	Q32P51	3	Q32P51_K3	87.789	SK(1)SASPKEPEQLR	2	1.1057	6042.1	0	10712.2	1405.83	14389.4	11097.1	8094.92	14034.4	14136.3
sp|Q3B726|RPA43_HUMAN DNA-directed RNA polymerase I subunit RPA43 OS=Homo sapiens OX=9606 GN=POLR1F PE=1 SV=1	Q3B726	227	Q3B726_K227	64.841	K(0.001)PK(1)K(1)K(1)K(1)K(1)K	2	-0.0040097	0	0	0	3564.59	5626.61	2440.53	0	0	0
sp|Q3B726|RPA43_HUMAN DNA-directed RNA polymerase I subunit RPA43 OS=Homo sapiens OX=9606 GN=POLR1F PE=1 SV=1	Q3B726	228	Q3B726_K228	64.841	K(0.001)PK(1)K(1)K(1)K(1)K(1)K	2	-0.0040097	0	0	0	3564.59	5626.61	2440.53	0	0	0
sp|Q3B726|RPA43_HUMAN DNA-directed RNA polymerase I subunit RPA43 OS=Homo sapiens OX=9606 GN=POLR1F PE=1 SV=1	Q3B726	229	Q3B726_K229	64.841	K(0.001)PK(1)K(1)K(1)K(1)K(1)K	2	-0.0040097	0	0	0	3564.59	5626.61	2440.53	0	0	0
sp|Q3B726|RPA43_HUMAN DNA-directed RNA polymerase I subunit RPA43 OS=Homo sapiens OX=9606 GN=POLR1F PE=1 SV=1	Q3B726	230	Q3B726_K230	64.841	K(0.001)PK(1)K(1)K(1)K(1)K(1)K	2	-0.0040097	0	0	0	3564.59	5626.61	2440.53	0	0	0
sp|Q3B726|RPA43_HUMAN DNA-directed RNA polymerase I subunit RPA43 OS=Homo sapiens OX=9606 GN=POLR1F PE=1 SV=1	Q3B726	231	Q3B726_K231	64.841	K(0.001)PK(1)K(1)K(1)K(1)K(1)K	2	-0.0040097	0	0	0	3564.59	5626.61	2440.53	0	0	0
sp|Q3B8N5|PROX2_HUMAN Prospero homeobox protein 2 OS=Homo sapiens OX=9606 GN=PROX2 PE=2 SV=3	Q3B8N5	307	Q3B8N5_K307	52.823	VQLQAGVPVGNLSLAK(1)R	3	-2.3829	0	0	0	0	0	0	0	0	24493.2
sp|Q3MIT2|PUS10_HUMAN tRNA pseudouridine synthase Pus10 OS=Homo sapiens OX=9606 GN=PUS10 PE=1 SV=1	Q3MIT2	238	Q3MIT2_K238	52.298	PAK(0.994)NK(0.009)QSVFTRMAVMK(0.499)ALNK(0.499)IK	3	2.324	0	0	0	0	0	0	0	0	0
sp|Q3MIT2|PUS10_HUMAN tRNA pseudouridine synthase Pus10 OS=Homo sapiens OX=9606 GN=PUS10 PE=1 SV=1	Q3MIT2	251	Q3MIT2_K251	52.298	PAK(0.994)NK(0.009)QSVFTRMAVMK(0.499)ALNK(0.499)IK	3	2.324	0	0	0	0	0	0	0	0	0
sp|Q3MIT2|PUS10_HUMAN tRNA pseudouridine synthase Pus10 OS=Homo sapiens OX=9606 GN=PUS10 PE=1 SV=1	Q3MIT2	255	Q3MIT2_K255	52.298	PAK(0.994)NK(0.009)QSVFTRMAVMK(0.499)ALNK(0.499)IK	3	2.324	0	0	0	0	0	0	0	0	0
sp|Q3MJ13|WDR72_HUMAN WD repeat-containing protein 72 OS=Homo sapiens OX=9606 GN=WDR72 PE=2 SV=2	Q3MJ13	937	Q3MJ13_K937	46.481	VGSSFRMESIHNK(1)MR	3	1.0476	0	0	0	3958.32	3747.48	2819.77	827.66	8273.29	5157.24
sp|Q3SY52|ZIK1_HUMAN Zinc finger protein interacting with ribonucleoprotein K OS=Homo sapiens OX=9606 GN=ZIK1 PE=1 SV=1	Q3SY52	156	Q3SY52_K156	48.848	DMDRASYVK(1)CCLFCMSLK(1)PFR	3	-0.97136	0	0	0	0	0	0	0	21619.7	0
sp|Q3SY52|ZIK1_HUMAN Zinc finger protein interacting with ribonucleoprotein K OS=Homo sapiens OX=9606 GN=ZIK1 PE=1 SV=1	Q3SY52	165	Q3SY52_K165	48.848	DMDRASYVK(1)CCLFCMSLK(1)PFR	3	-0.97136	0	0	0	0	0	0	0	21619.7	0
sp|Q3SY77|UD3A2_HUMAN UDP-glucuronosyltransferase 3A2 OS=Homo sapiens OX=9606 GN=UGT3A2 PE=2 SV=1	Q3SY77	423	Q3SY77_K423	53.869	AETLALK(1)MK(1)QIMEDK	3	-0.21355	0	0	0	0	0	0	0	0	0
sp|Q3SY77|UD3A2_HUMAN UDP-glucuronosyltransferase 3A2 OS=Homo sapiens OX=9606 GN=UGT3A2 PE=2 SV=1	Q3SY77	425	Q3SY77_K425	53.869	AETLALK(1)MK(1)QIMEDK	3	-0.21355	0	0	0	0	0	0	0	0	0
sp|Q49MI3|CERKL_HUMAN Ceramide kinase-like protein OS=Homo sapiens OX=9606 GN=CERKL PE=1 SV=1	Q49MI3	96	Q49MI3_K96	64.675	EEFIELK(1)DIFSVK(1)LK(1)RR	3	-1.8592	0	0	0	0	0	0	0	0	0
sp|Q49MI3|CERKL_HUMAN Ceramide kinase-like protein OS=Homo sapiens OX=9606 GN=CERKL PE=1 SV=1	Q49MI3	102	Q49MI3_K102	64.675	EEFIELK(1)DIFSVK(1)LK(1)RR	3	-1.8592	0	0	0	0	0	0	0	0	0
sp|Q49MI3|CERKL_HUMAN Ceramide kinase-like protein OS=Homo sapiens OX=9606 GN=CERKL PE=1 SV=1	Q49MI3	104	Q49MI3_K104	64.675	EEFIELK(1)DIFSVK(1)LK(1)RR	3	-1.8592	0	0	0	0	0	0	0	0	0
sp|Q4AC94|C2CD3_HUMAN C2 domain-containing protein 3 OS=Homo sapiens OX=9606 GN=C2CD3 PE=1 SV=4	Q4AC94	1453	Q4AC94_K1453	52.298	K(0.794)PK(0.207)ESVNK(0.93)K(0.069)QIMVTFK(0.5)ASK(0.5)R	3	-3.2173	0	522.171	538.147	0	743.159	757.307	0	254.915	0
sp|Q4AC94|C2CD3_HUMAN C2 domain-containing protein 3 OS=Homo sapiens OX=9606 GN=C2CD3 PE=1 SV=4	Q4AC94	1455	Q4AC94_K1455	52.298	K(0.501)PK(0.501)ESVNK(0.868)K(0.139)QIMVTFK(0.442)ASK(0.548)R	3	-3.1397	0	0	0	0	0	0	0	0	0
sp|Q4AC94|C2CD3_HUMAN C2 domain-containing protein 3 OS=Homo sapiens OX=9606 GN=C2CD3 PE=1 SV=4	Q4AC94	1460	Q4AC94_K1460	52.298	K(0.794)PK(0.207)ESVNK(0.93)K(0.069)QIMVTFK(0.5)ASK(0.5)R	3	-3.2173	0	522.171	538.147	0	743.159	757.307	0	254.915	0
sp|Q4AC94|C2CD3_HUMAN C2 domain-containing protein 3 OS=Homo sapiens OX=9606 GN=C2CD3 PE=1 SV=4	Q4AC94	1468	Q4AC94_K1468	50.722	K(0.794)PK(0.207)ESVNK(0.93)K(0.069)QIMVTFK(0.5)ASK(0.5)R	3	-3.2173	0	0	0	0	0	0	0	0	0
sp|Q4AC94|C2CD3_HUMAN C2 domain-containing protein 3 OS=Homo sapiens OX=9606 GN=C2CD3 PE=1 SV=4	Q4AC94	1471	Q4AC94_K1471	52.298	K(0.501)PK(0.501)ESVNK(0.868)K(0.139)QIMVTFK(0.442)ASK(0.548)R	3	-3.1397	0	0	0	0	0	0	0	0	0
sp|Q4G0P3|HYDIN_HUMAN Hydrocephalus-inducing protein homolog OS=Homo sapiens OX=9606 GN=HYDIN PE=1 SV=3	Q4G0P3	2331	Q4G0P3_K2331	43.534	K(0.989)REQERLAK(0.009)EMQEK(0.001)K(0.001)LQQELER	4	1.3581	0	0	29213	49507.3	4411.29	41062	0	47343.7	27782.6
sp|Q53F39|MPPE1_HUMAN Metallophosphoesterase 1 OS=Homo sapiens OX=9606 GN=MPPE1 PE=1 SV=2	Q53F39	17	Q53F39_K17	47.971	AMIELGFGRQNFHPLK(1)R	2	-3.6746	0	0	0	0	0	0	0	0	0
sp|Q58FG1|HS904_HUMAN Putative heat shock protein HSP 90-alpha A4 OS=Homo sapiens OX=9606 GN=HSP90AA4P PE=5 SV=1	Q58FG1	9	Q58FG1_K9	49.089	MESLTDPSK(1)LDSGK(1)EPHISLIPNK	3	1.8728	0	2512.38	0	0	0	0	7169.46	0	0
sp|Q58FG1|HS904_HUMAN Putative heat shock protein HSP 90-alpha A4 OS=Homo sapiens OX=9606 GN=HSP90AA4P PE=5 SV=1	Q58FG1	14	Q58FG1_K14	49.089	MESLTDPSK(1)LDSGK(1)EPHISLIPNK	3	1.8728	0	2512.38	0	0	0	0	7169.46	0	0
sp|Q5BKY9|F133B_HUMAN Protein FAM133B OS=Homo sapiens OX=9606 GN=FAM133B PE=1 SV=1	Q5BKY9	89	Q5BKY9_K89	103.26	LLSGSESSSK(1)K(1)R	2	0.39549	0	0	0	14427.5	12663.3	11879.2	11338.4	21633.1	17011.5
sp|Q5BKY9|F133B_HUMAN Protein FAM133B OS=Homo sapiens OX=9606 GN=FAM133B PE=1 SV=1	Q5BKY9	90	Q5BKY9_K90	103.26	LLSGSESSSK(1)K(1)R	2	0.39549	0	0	0	14427.5	12663.3	11879.2	11338.4	21633.1	17011.5
sp|Q8N2N9|AN36B_HUMAN Ankyrin repeat domain-containing protein 36B OS=Homo sapiens OX=9606 GN=ANKRD36B PE=1 SV=4;sp|Q5JPF3|AN36C_HUMAN Ankyrin repeat domain-containing protein 36C OS=Homo sapiens OX=9606 GN=ANKRD36C PE=1 SV=3	Q8N2N9;Q5JPF3	610;1036	Q8N2N9_K610	66.215	K(0.998)DSVSNIATEIK(0.002)DGQIRGTVSSQR	2	1.3757	0	0	2910.09	0	0	588370	0	0	0
sp|Q5QNW6|H2B2F_HUMAN Histone H2B type 2-F OS=Homo sapiens OX=9606 GN=H2BC18 PE=1 SV=3	Q5QNW6	21	Q5QNW6_K21	146.71	AVTK(1)VQK(1)K	1	-0.88482	0	0	0	0	1982.24	1801.77	2195.1	11464.7	11973.1
sp|Q5QNW6|H2B2F_HUMAN Histone H2B type 2-F OS=Homo sapiens OX=9606 GN=H2BC18 PE=1 SV=3	Q5QNW6	24	Q5QNW6_K24	146.71	AVTK(1)VQK(1)K	1	-0.88482	0	0	0	0	1982.24	1801.77	2195.1	11464.7	11973.1
sp|Q5QNW6|H2B2F_HUMAN Histone H2B type 2-F OS=Homo sapiens OX=9606 GN=H2BC18 PE=1 SV=3	Q5QNW6	13	Q5QNW6_K13	154.46	SAPAPK(1)K(1)GSK(1)K(1)AVTK	1	-0.89378	0	0	0	28776.8	46380.9	30439.5	135965	285208	306397
sp|Q5QNW6|H2B2F_HUMAN Histone H2B type 2-F OS=Homo sapiens OX=9606 GN=H2BC18 PE=1 SV=3	Q5QNW6	16	Q5QNW6_K16	154.46	SAPAPK(1)K(1)GSK(1)K(1)AVTK	1	-0.89378	0	0	0	76607.2	85011.2	42928.8	135965	351554	390590
sp|Q5QNW6|H2B2F_HUMAN Histone H2B type 2-F OS=Homo sapiens OX=9606 GN=H2BC18 PE=1 SV=3	Q5QNW6	17	Q5QNW6_K17	154.46	SAPAPK(1)K(1)GSK(1)K(1)AVTK	1	-0.89378	0	0	0	76607.2	85011.2	42928.8	135965	351554	390590
sp|Q5QNW6|H2B2F_HUMAN Histone H2B type 2-F OS=Homo sapiens OX=9606 GN=H2BC18 PE=1 SV=3	Q5QNW6	12	Q5QNW6_K12	154.46	SAPAPK(1)K(1)GSK(1)K(1)AVTK	1	-0.89378	0	0	0	27649.8	45761.7	30439.5	135965	283857	303595
sp|Q5S007|LRRK2_HUMAN Leucine-rich repeat serine/threonine-protein kinase 2 OS=Homo sapiens OX=9606 GN=LRRK2 PE=1 SV=2	Q5S007	1356	Q5S007_K1356	42.59	TTLLQQLMK(1)TK(1)K(1)SDLGMQSATVGIDVK(1)DWPIQIR	3	-0.1383	0	0	0	0	0	0	0	0	0
sp|Q5S007|LRRK2_HUMAN Leucine-rich repeat serine/threonine-protein kinase 2 OS=Homo sapiens OX=9606 GN=LRRK2 PE=1 SV=2	Q5S007	1358	Q5S007_K1358	42.59	TTLLQQLMK(1)TK(1)K(1)SDLGMQSATVGIDVK(1)DWPIQIR	3	-0.1383	0	0	0	0	0	0	0	0	0
sp|Q5S007|LRRK2_HUMAN Leucine-rich repeat serine/threonine-protein kinase 2 OS=Homo sapiens OX=9606 GN=LRRK2 PE=1 SV=2	Q5S007	1359	Q5S007_K1359	42.59	TTLLQQLMK(1)TK(1)K(1)SDLGMQSATVGIDVK(1)DWPIQIR	3	-0.1383	0	0	0	0	0	0	0	0	0
sp|Q5S007|LRRK2_HUMAN Leucine-rich repeat serine/threonine-protein kinase 2 OS=Homo sapiens OX=9606 GN=LRRK2 PE=1 SV=2	Q5S007	1374	Q5S007_K1374	42.59	TTLLQQLMK(1)TK(1)K(1)SDLGMQSATVGIDVK(1)DWPIQIR	3	-0.1383	0	0	0	0	0	0	0	0	0
sp|Q5SSJ5|HP1B3_HUMAN Heterochromatin protein 1-binding protein 3 OS=Homo sapiens OX=9606 GN=HP1BP3 PE=1 SV=1	Q5SSJ5	334	Q5SSJ5_K334	54.658	SGEK(1)PLLGGSLMEYAILSAIAAMNEPK	3	0.29057	0	5949.85	0	0	0	0	0	12677.7	8540.64
sp|Q5SXM2|SNPC4_HUMAN snRNA-activating protein complex subunit 4 OS=Homo sapiens OX=9606 GN=SNAPC4 PE=1 SV=1	Q5SXM2	496	Q5SXM2_K496	51.854	WK(1)IMMGK	1	-0.69079	11210.7	5804.03	0	0	8644.75	0	0	0	0
sp|Q5T3F8|CSCL2_HUMAN CSC1-like protein 2 OS=Homo sapiens OX=9606 GN=TMEM63B PE=1 SV=1	Q5T3F8	548	Q5T3F8_K548	93.195	K(1)FLAEAAIR	2	-0.014674	0	0	0	0	0	0	0	0	0
sp|Q5T3I0|GPTC4_HUMAN G patch domain-containing protein 4 OS=Homo sapiens OX=9606 GN=GPATCH4 PE=1 SV=2	Q5T3I0	437	Q5T3I0_K437	87.831	AGVSTVQK(1)AK(1)K(1)K	2	-0.5666	0	0	0	11513.5	12243.2	10252.2	7536.32	14280.8	8982.9
sp|Q5T3I0|GPTC4_HUMAN G patch domain-containing protein 4 OS=Homo sapiens OX=9606 GN=GPATCH4 PE=1 SV=2	Q5T3I0	439	Q5T3I0_K439	87.831	AGVSTVQK(1)AK(1)K(1)K	2	-0.5666	0	0	0	11513.5	12243.2	10252.2	7536.32	14280.8	8982.9
sp|Q5T3I0|GPTC4_HUMAN G patch domain-containing protein 4 OS=Homo sapiens OX=9606 GN=GPATCH4 PE=1 SV=2	Q5T3I0	440	Q5T3I0_K440	87.831	AGVSTVQK(1)AK(1)K(1)K	2	-0.5666	0	0	0	11513.5	12243.2	10252.2	7536.32	14280.8	8982.9
sp|Q5T3I0|GPTC4_HUMAN G patch domain-containing protein 4 OS=Homo sapiens OX=9606 GN=GPATCH4 PE=1 SV=2	Q5T3I0	203	Q5T3I0_K203	88.486	PPK(1)K(1)K(1)K(1)K(1)K	2	0.21892	1143.12	1581.52	0	16641.4	12926.5	6889.31	3993.61	0	12663.7
sp|Q5T4S7|UBR4_HUMAN E3 ubiquitin-protein ligase UBR4 OS=Homo sapiens OX=9606 GN=UBR4 PE=1 SV=1	Q5T4S7	4025	Q5T4S7_K4025	64.224	ILQK(0.007)LIK(0.993)PPAPTSKK	3	4.3717	0	0	0	0	0	0	0	0	0
sp|Q5T8I3|EEIG2_HUMAN EEIG family member 2 OS=Homo sapiens OX=9606 GN=EEIG2 PE=1 SV=2	Q5T8I3	5	Q5T8I3_K5	46.37	MMK(0.009)K(0.009)K(0.991)K(0.991)FK	2	-0.54391	1159	3489.03	0	4697.7	3572.05	0	0	0	4346.9
sp|Q5T8I3|EEIG2_HUMAN EEIG family member 2 OS=Homo sapiens OX=9606 GN=EEIG2 PE=1 SV=2	Q5T8I3	6	Q5T8I3_K6	46.37	MMK(0.009)K(0.009)K(0.991)K(0.991)FK	2	-0.54391	1159	3489.03	0	4697.7	3572.05	0	0	0	4346.9
sp|Q5TAP6|UT14C_HUMAN U3 small nucleolar RNA-associated protein 14 homolog C OS=Homo sapiens OX=9606 GN=UTP14C PE=1 SV=1;sp|Q9BVJ6|UT14A_HUMAN U3 small nucleolar RNA-associated protein 14 homolog A OS=Homo sapiens OX=9606 GN=UTP14A PE=1 SV=1	Q5TAP6;Q9BVJ6	297;298	Q5TAP6_K297	103.43	MSLK(1)HQNSGK	2	0.022124	0	0	0	635.946	729.912	332.048	1005.79	1066.34	0
sp|Q5U5Z8|CBPC2_HUMAN Cytosolic carboxypeptidase 2 OS=Homo sapiens OX=9606 GN=AGBL2 PE=1 SV=2	Q5U5Z8	744	Q5U5Z8_K744	99.136	K(0.362)K(0.638)MFK(1)K(1)K	2	1.523	0	0	0	152.488	216.839	0	248.28	0	0
sp|Q5U5Z8|CBPC2_HUMAN Cytosolic carboxypeptidase 2 OS=Homo sapiens OX=9606 GN=AGBL2 PE=1 SV=2	Q5U5Z8	747	Q5U5Z8_K747	99.136	K(0.362)K(0.638)MFK(1)K(1)K	2	1.523	0	0	0	152.488	216.839	0	248.28	0	0
sp|Q5U5Z8|CBPC2_HUMAN Cytosolic carboxypeptidase 2 OS=Homo sapiens OX=9606 GN=AGBL2 PE=1 SV=2	Q5U5Z8	748	Q5U5Z8_K748	99.136	K(0.362)K(0.638)MFK(1)K(1)K	2	1.523	0	0	0	152.488	216.839	0	248.28	0	0
sp|Q5VXH5|PRAM7_HUMAN PRAME family member 7 OS=Homo sapiens OX=9606 GN=PRAMEF7 PE=2 SV=2;sp|Q5VWM4|PRAM8_HUMAN PRAME family member 8 OS=Homo sapiens OX=9606 GN=PRAMEF8 PE=2 SV=2	Q5VXH5;Q5VWM4	154;154	Q5VXH5_K154	60.345	QQPFMVFIDLCLK(1)NR	3	-3.9342	0	0	0	0	0	0	0	0	0
sp|Q5VWM6|PRA13_HUMAN Putative PRAME family member 13 OS=Homo sapiens OX=9606 GN=PRAMEF13 PE=5 SV=2	Q5VWM6	229	Q5VWM6_K229	59.606	LRCYLK(0.999)EMKTLGKLVFSR	2	-3.8191	0	0	0	0	0	0	0	0	0
sp|Q5VX52|SPAT1_HUMAN Spermatogenesis-associated protein 1 OS=Homo sapiens OX=9606 GN=SPATA1 PE=2 SV=4	Q5VX52	307	Q5VX52_K307	45.718	QMK(0.001)QVK(0.999)EER	1	-3.741	0	0	2271.57	0	0	0	0	0	0
sp|Q5VYK3|ECM29_HUMAN Proteasome adapter and scaffold protein ECM29 OS=Homo sapiens OX=9606 GN=ECPAS PE=1 SV=2	Q5VYK3	1630	Q5VYK3_K1630	53.909	ENVK(0.5)YK(0.5)IVAISCAADILKATK	3	-1.796	0	2487.3	0	0	0	0	0	0	0
sp|Q5VYK3|ECM29_HUMAN Proteasome adapter and scaffold protein ECM29 OS=Homo sapiens OX=9606 GN=ECPAS PE=1 SV=2	Q5VYK3	1632	Q5VYK3_K1632	53.909	ENVK(0.5)YK(0.5)IVAISCAADILKATK	3	-1.796	0	2487.3	0	0	0	0	0	0	0
sp|Q5XXA6|ANO1_HUMAN Anoctamin-1 OS=Homo sapiens OX=9606 GN=ANO1 PE=1 SV=1	Q5XXA6	175	Q5XXA6_K175	52.52	LK(0.763)MPTK(0.373)K(0.864)MYHINETRGLLKK	3	0.16581	0	0	0	0	0	0	0	65712	0
sp|Q5XXA6|ANO1_HUMAN Anoctamin-1 OS=Homo sapiens OX=9606 GN=ANO1 PE=1 SV=1	Q5XXA6	180	Q5XXA6_K180	52.52	LK(0.763)MPTK(0.373)K(0.864)MYHINETRGLLKK	3	0.16581	0	0	0	0	0	0	0	65712	0
sp|Q63HQ2|EGFLA_HUMAN Pikachurin OS=Homo sapiens OX=9606 GN=EGFLAM PE=1 SV=2	Q63HQ2	289	Q63HQ2_K289	62.049	GGNK(0.512)K(0.577)FLVESK(0.932)K(0.979)MSISNPK(1)TISR	3	-0.31397	0	0	0	0	0	0	0	150.057	0
sp|Q63HQ2|EGFLA_HUMAN Pikachurin OS=Homo sapiens OX=9606 GN=EGFLAM PE=1 SV=2	Q63HQ2	295	Q63HQ2_K295	62.049	GGNK(0.512)K(0.577)FLVESK(0.932)K(0.979)MSISNPK(1)TISR	3	-0.31397	0	0	0	0	0	0	0	150.057	0
sp|Q63HQ2|EGFLA_HUMAN Pikachurin OS=Homo sapiens OX=9606 GN=EGFLAM PE=1 SV=2	Q63HQ2	296	Q63HQ2_K296	62.049	GGNK(0.512)K(0.577)FLVESK(0.932)K(0.979)MSISNPK(1)TISR	3	-0.31397	0	0	0	0	0	0	0	150.057	0
sp|Q63HQ2|EGFLA_HUMAN Pikachurin OS=Homo sapiens OX=9606 GN=EGFLAM PE=1 SV=2	Q63HQ2	303	Q63HQ2_K303	62.049	GGNK(0.512)K(0.577)FLVESK(0.932)K(0.979)MSISNPK(1)TISR	3	-0.31397	0	0	0	0	0	0	0	150.057	0
sp|Q68DE3|USF3_HUMAN Basic helix-loop-helix domain-containing protein USF3 OS=Homo sapiens OX=9606 GN=USF3 PE=1 SV=4	Q68DE3	12	Q68DE3_K12	59.898	PEMTENETPTK(1)K	2	1.6162	0	2949.39	0	0	0	5177.12	8272.66	7957.64	0
sp|Q68E01|INT3_HUMAN Integrator complex subunit 3 OS=Homo sapiens OX=9606 GN=INTS3 PE=1 SV=1	Q68E01	986	Q68E01_K986	62.847	FSDLFSLAEEYEDSSTK(0.078)PPK(0.922)SR	3	-0.10075	0	0	0	0	0	0	0	7729.29	0
sp|Q6DKI1|RL7L_HUMAN Ribosomal protein uL30-like OS=Homo sapiens OX=9606 GN=RPL7L1 PE=1 SV=2	Q6DKI1	47	Q6DKI1_K47	74.533	QALLAK(0.965)K(0.058)EQK(0.489)K(0.489)GK	2	3.9484	0	0	0	0	0	0	0	0	0
sp|Q6DKI1|RL7L_HUMAN Ribosomal protein uL30-like OS=Homo sapiens OX=9606 GN=RPL7L1 PE=1 SV=2	Q6DKI1	51	Q6DKI1_K51	74.533	QALLAK(0.965)K(0.058)EQK(0.489)K(0.489)GK	2	3.9484	0	0	0	0	0	0	0	0	0
sp|Q6DKI1|RL7L_HUMAN Ribosomal protein uL30-like OS=Homo sapiens OX=9606 GN=RPL7L1 PE=1 SV=2	Q6DKI1	52	Q6DKI1_K52	74.533	QALLAK(0.965)K(0.058)EQK(0.489)K(0.489)GK	2	3.9484	0	0	0	0	0	0	0	0	0
sp|Q6IMN6|CAPR2_HUMAN Caprin-2 OS=Homo sapiens OX=9606 GN=CAPRIN2 PE=1 SV=1	Q6IMN6	212	Q6IMN6_K212	44.847	AQRREHMLK(0.168)LEAEK(0.168)K(0.664)K	2	-0.54434	366.281	190.233	400.209	0	0	0	0	406.617	630.828
sp|Q6N022|TEN4_HUMAN Teneurin-4 OS=Homo sapiens OX=9606 GN=TENM4 PE=1 SV=2	Q6N022	4	Q6N022_K4	57.174	DVK(0.986)ERK(0.014)PYRSLTRRR	2	0.87987	0	0	0	0	0	0	0	0	0
sp|Q6NUJ2|CK087_HUMAN Uncharacterized protein C11orf87 OS=Homo sapiens OX=9606 GN=C11orf87 PE=1 SV=2	Q6NUJ2	90	Q6NUJ2_K90	66.429	RRMK(0.999)K(0.006)RK(0.995)MQR	2	1.0591	0	0	0	0	0	0	0	0	0
sp|Q6NUJ2|CK087_HUMAN Uncharacterized protein C11orf87 OS=Homo sapiens OX=9606 GN=C11orf87 PE=1 SV=2	Q6NUJ2	93	Q6NUJ2_K93	66.429	RRMK(0.999)K(0.006)RK(0.995)MQR	2	1.0591	0	0	0	0	0	0	0	0	0
sp|Q6NYC1|JMJD6_HUMAN Bifunctional arginine demethylase and lysyl-hydroxylase JMJD6 OS=Homo sapiens OX=9606 GN=JMJD6 PE=1 SV=1	Q6NYC1	154	Q6NYC1_K154	141.38	VPK(1)FFTDDLFQYAGEK	2	0.2789	0	0	0	31895.7	33609.9	25420.7	35976.4	40253.3	22839.7
sp|Q6P1X5|TAF2_HUMAN Transcription initiation factor TFIID subunit 2 OS=Homo sapiens OX=9606 GN=TAF2 PE=1 SV=3	Q6P1X5	14	Q6P1X5_K14	43.604	PLTGVEPARMNRK(0.5)K(0.5)GDK	2	3.9689	0	0	0	0	0	0	0	0	0
sp|Q6P1X5|TAF2_HUMAN Transcription initiation factor TFIID subunit 2 OS=Homo sapiens OX=9606 GN=TAF2 PE=1 SV=3	Q6P1X5	15	Q6P1X5_K15	43.604	PLTGVEPARMNRK(0.5)K(0.5)GDK	2	3.9689	0	0	0	0	0	0	0	0	0
sp|Q6P6C2|ALKB5_HUMAN RNA demethylase ALKBH5 OS=Homo sapiens OX=9606 GN=ALKBH5 PE=1 SV=2	Q6P6C2	57	Q6P6C2_K57	143.21	EAAAAAAAAVAAAAAAAAAAEPYPVSGAK(1)R	3	0.082968	0	0	0	62807.1	30202.3	24842.2	26735	53484.7	55243.7
sp|Q6PGQ7|BORA_HUMAN Protein aurora borealis OS=Homo sapiens OX=9606 GN=BORA PE=1 SV=2	Q6PGQ7	5	Q6PGQ7_K5	66.826	MGDVK(1)ESK(1)MQITPETPGR	2	3.3749	0	0	0	0	0	0	0	0	0
sp|Q6PGQ7|BORA_HUMAN Protein aurora borealis OS=Homo sapiens OX=9606 GN=BORA PE=1 SV=2	Q6PGQ7	8	Q6PGQ7_K8	66.826	MGDVK(1)ESK(1)MQITPETPGR	2	3.3749	0	0	0	0	0	0	0	0	0
sp|Q6PH81|CP087_HUMAN UPF0547 protein C16orf87 OS=Homo sapiens OX=9606 GN=C16orf87 PE=1 SV=1	Q6PH81	7	Q6PH81_K7	63.534	MSATRAK(0.724)K(0.276)VK	2	4.2935	0	0	3714.65	0	0	0	0	0	0
sp|Q6Q759|SPG17_HUMAN Sperm-associated antigen 17 OS=Homo sapiens OX=9606 GN=SPAG17 PE=1 SV=1	Q6Q759	1184	Q6Q759_K1184	52.644	GK(0.039)IK(0.091)GK(0.463)EK(0.406)PK(0.219)ESLK(0.781)EEEHPK	3	-1.9167	0	0	0	0	0	0	0	0	0
sp|Q6Q759|SPG17_HUMAN Sperm-associated antigen 17 OS=Homo sapiens OX=9606 GN=SPAG17 PE=1 SV=1	Q6Q759	1186	Q6Q759_K1186	52.644	GK(0.039)IK(0.091)GK(0.463)EK(0.406)PK(0.219)ESLK(0.781)EEEHPK	3	-1.9167	0	0	0	0	0	0	0	0	0
sp|Q6Q759|SPG17_HUMAN Sperm-associated antigen 17 OS=Homo sapiens OX=9606 GN=SPAG17 PE=1 SV=1	Q6Q759	1192	Q6Q759_K1192	52.644	GK(0.039)IK(0.091)GK(0.463)EK(0.406)PK(0.219)ESLK(0.781)EEEHPK	3	-1.9167	0	0	0	29754.4	0	0	0	0	0
sp|Q6Q759|SPG17_HUMAN Sperm-associated antigen 17 OS=Homo sapiens OX=9606 GN=SPAG17 PE=1 SV=1	Q6Q759	984	Q6Q759_K984	56.359	SLK(1)K(1)K(1)SPYK(1)EK(1)SK	2	2.0501	0	0	0	0	0	0	0	0	0
sp|Q6Q759|SPG17_HUMAN Sperm-associated antigen 17 OS=Homo sapiens OX=9606 GN=SPAG17 PE=1 SV=1	Q6Q759	985	Q6Q759_K985	56.359	SLK(1)K(1)K(1)SPYK(1)EK(1)SK	2	2.0501	0	0	0	0	0	0	0	0	0
sp|Q6Q759|SPG17_HUMAN Sperm-associated antigen 17 OS=Homo sapiens OX=9606 GN=SPAG17 PE=1 SV=1	Q6Q759	986	Q6Q759_K986	56.359	SLK(1)K(1)K(1)SPYK(1)EK(1)SK	2	2.0501	0	0	0	0	0	0	0	0	0
sp|Q6Q759|SPG17_HUMAN Sperm-associated antigen 17 OS=Homo sapiens OX=9606 GN=SPAG17 PE=1 SV=1	Q6Q759	990	Q6Q759_K990	56.359	SLK(1)K(1)K(1)SPYK(1)EK(1)SK	2	2.0501	0	0	0	0	0	0	0	0	0
sp|Q6Q759|SPG17_HUMAN Sperm-associated antigen 17 OS=Homo sapiens OX=9606 GN=SPAG17 PE=1 SV=1	Q6Q759	992	Q6Q759_K992	56.359	SLK(1)K(1)K(1)SPYK(1)EK(1)SK	2	2.0501	0	0	0	0	0	0	0	0	0
sp|Q6W3E5|GDPD4_HUMAN Glycerophosphodiester phosphodiesterase domain-containing protein 4 OS=Homo sapiens OX=9606 GN=GDPD4 PE=2 SV=1	Q6W3E5	573	Q6W3E5_K573	94.023	PGK(1)HEIQPPMPTVVFELTQAPTR	2	3.7831	0	0	351.319	571.367	0	0	0	175.594	269.207
sp|Q6Y7W6|GGYF2_HUMAN GRB10-interacting GYF protein 2 OS=Homo sapiens OX=9606 GN=GIGYF2 PE=1 SV=1	Q6Y7W6	407	Q6Y7W6_K407	52.03	TEQTEK(1)AEEETRMENSLPAKVPSR	3	-3.4439	0	0	0	0	0	0	0	0	0
sp|Q6ZQQ6|WDR87_HUMAN WD repeat-containing protein 87 OS=Homo sapiens OX=9606 GN=WDR87 PE=1 SV=4	Q6ZQQ6	1181	Q6ZQQ6_K1181	60.968	RDK(1)K(1)ATAQK(0.955)LK(0.295)K(0.75)K	2	-1.7751	868.839	4355.53	0	0	21478.3	0	2830.4	0	0
sp|Q6ZQQ6|WDR87_HUMAN WD repeat-containing protein 87 OS=Homo sapiens OX=9606 GN=WDR87 PE=1 SV=4	Q6ZQQ6	1182	Q6ZQQ6_K1182	60.968	RDK(1)K(1)ATAQK(0.955)LK(0.295)K(0.75)K	2	-1.7751	868.839	4355.53	0	0	21478.3	0	2830.4	0	0
sp|Q6ZQQ6|WDR87_HUMAN WD repeat-containing protein 87 OS=Homo sapiens OX=9606 GN=WDR87 PE=1 SV=4	Q6ZQQ6	1187	Q6ZQQ6_K1187	60.968	RDK(1)K(1)ATAQK(0.955)LK(0.295)K(0.75)K	2	-1.7751	868.839	4355.53	0	0	21478.3	0	2830.4	0	0
sp|Q6ZQQ6|WDR87_HUMAN WD repeat-containing protein 87 OS=Homo sapiens OX=9606 GN=WDR87 PE=1 SV=4	Q6ZQQ6	1190	Q6ZQQ6_K1190	60.968	RDK(1)K(1)ATAQK(0.955)LK(0.295)K(0.75)K	2	-1.7751	868.839	4355.53	0	0	21478.3	0	2830.4	0	0
sp|Q6ZS81|WDFY4_HUMAN WD repeat- and FYVE domain-containing protein 4 OS=Homo sapiens OX=9606 GN=WDFY4 PE=1 SV=3	Q6ZS81	2102	Q6ZS81_K2102	68.261	PRMSTYHQVFLSPNEDVK(1)EK(1)R	3	-1.1499	0	0	0	0	0	0	0	0	0
sp|Q6ZS81|WDFY4_HUMAN WD repeat- and FYVE domain-containing protein 4 OS=Homo sapiens OX=9606 GN=WDFY4 PE=1 SV=3	Q6ZS81	2104	Q6ZS81_K2104	68.261	PRMSTYHQVFLSPNEDVK(1)EK(1)R	3	-1.1499	0	0	0	0	0	0	0	0	0
sp|Q76FK4|NOL8_HUMAN Nucleolar protein 8 OS=Homo sapiens OX=9606 GN=NOL8 PE=1 SV=1	Q76FK4	586	Q76FK4_K586	72.243	GVGCLYEK(0.003)ESMK(0.997)K	2	1.5058	5956.39	5886.34	9479.26	15291.4	0	0	0	0	7070.87
sp|Q7L1Q6|5MP2_HUMAN eIF5-mimic protein 2 OS=Homo sapiens OX=9606 GN=BZW1 PE=1 SV=1	Q7L1Q6	5	Q7L1Q6_K5	72.615	MNNQK(0.999)QQK(0.001)PTLSGQR	2	-0.176	0	0	0	0	0	549.478	0	0	3132.2
sp|Q7L3T8|SYPM_HUMAN Probable proline--tRNA ligase, mitochondrial OS=Homo sapiens OX=9606 GN=PARS2 PE=1 SV=1	Q7L3T8	116	Q7L3T8_K116	40.112	VIDQEMQAIGGQK(1)VNMPSLSPAELWQATNRWDLMGK	3	3.6368	0	0	0	0	0	0	0	0	0
sp|Q7Z3T8|ZFY16_HUMAN Zinc finger FYVE domain-containing protein 16 OS=Homo sapiens OX=9606 GN=ZFYVE16 PE=1 SV=3	Q7Z3T8	325	Q7Z3T8_K325	60.901	DENFK(1)LPDFSFQEDK(1)TVIK	2	3.1502	0	0	0	0	0	0	0	0	0
sp|Q7Z3T8|ZFY16_HUMAN Zinc finger FYVE domain-containing protein 16 OS=Homo sapiens OX=9606 GN=ZFYVE16 PE=1 SV=3	Q7Z3T8	335	Q7Z3T8_K335	60.901	DENFK(1)LPDFSFQEDK(1)TVIK	2	3.1502	0	0	0	0	0	0	0	0	0
sp|Q7Z407|CSMD3_HUMAN CUB and sushi domain-containing protein 3 OS=Homo sapiens OX=9606 GN=CSMD3 PE=2 SV=3	Q7Z407	26	Q7Z407_K26	48.216	CAK(1)CGRLDFILMK(1)K(1)MGIK	3	-2.456	0	0	0	0	0	0	0	0	0
sp|Q7Z407|CSMD3_HUMAN CUB and sushi domain-containing protein 3 OS=Homo sapiens OX=9606 GN=CSMD3 PE=2 SV=3	Q7Z407	36	Q7Z407_K36	48.216	CAK(1)CGRLDFILMK(1)K(1)MGIK	3	-2.456	0	0	0	0	0	0	0	0	0
sp|Q7Z407|CSMD3_HUMAN CUB and sushi domain-containing protein 3 OS=Homo sapiens OX=9606 GN=CSMD3 PE=2 SV=3	Q7Z407	37	Q7Z407_K37	48.216	CAK(1)CGRLDFILMK(1)K(1)MGIK	3	-2.456	0	0	0	0	0	0	0	0	0
sp|Q7Z407|CSMD3_HUMAN CUB and sushi domain-containing protein 3 OS=Homo sapiens OX=9606 GN=CSMD3 PE=2 SV=3	Q7Z407	6	Q7Z407_K6	64.104	KGIRK(0.996)GESRAK(0.003)ESK(0.001)PWEPGK	2	-1.4014	0	0	0	0	0	0	0	0	0
sp|Q7Z4V5|HDGR2_HUMAN Hepatoma-derived growth factor-related protein 2 OS=Homo sapiens OX=9606 GN=HDGFL2 PE=1 SV=1	Q7Z4V5	410	Q7Z4V5_K410	120.9	EAK(1)K(1)SAK(0.96)K(0.04)PQSSSTEPAR	2	-0.096039	0	0	0	6732.86	3019.15	2199.96	3082.21	15794	9785.61
sp|Q7Z4V5|HDGR2_HUMAN Hepatoma-derived growth factor-related protein 2 OS=Homo sapiens OX=9606 GN=HDGFL2 PE=1 SV=1	Q7Z4V5	411	Q7Z4V5_K411	120.9	EAK(1)K(1)SAK(0.98)K(0.02)PQSSSTEPAR	2	-0.42293	0	0	0	6732.86	3019.15	2199.96	3082.21	15794	9785.61
sp|Q7Z4V5|HDGR2_HUMAN Hepatoma-derived growth factor-related protein 2 OS=Homo sapiens OX=9606 GN=HDGFL2 PE=1 SV=1	Q7Z4V5	414	Q7Z4V5_K414	120.9	EAK(1)K(1)SAK(0.98)K(0.02)PQSSSTEPAR	2	-0.42293	0	110.938	0	8976.5	4910.6	3167.61	5613.17	18128.6	12485.4
sp|Q7Z4V5|HDGR2_HUMAN Hepatoma-derived growth factor-related protein 2 OS=Homo sapiens OX=9606 GN=HDGFL2 PE=1 SV=1	Q7Z4V5	415	Q7Z4V5_K415	86.699	SAK(0.5)K(0.5)PQSSSTEPAR	3	0.40644	0	0	0	0	1891.45	0	0	2334.28	2700.06
sp|Q7Z4V5|HDGR2_HUMAN Hepatoma-derived growth factor-related protein 2 OS=Homo sapiens OX=9606 GN=HDGFL2 PE=1 SV=1	Q7Z4V5	443	Q7Z4V5_K443	92.247	QQAK(1)PVK(1)VER	2	0.50201	0	0	0	35603.9	35634.1	27576.4	27889.8	94393.6	82161.8
sp|Q7Z4V5|HDGR2_HUMAN Hepatoma-derived growth factor-related protein 2 OS=Homo sapiens OX=9606 GN=HDGFL2 PE=1 SV=1	Q7Z4V5	446	Q7Z4V5_K446	92.247	QQAK(1)PVK(1)VER	2	0.50201	0	0	0	35603.9	35634.1	27576.4	27889.8	94393.6	82161.8
sp|Q7Z6E9|RBBP6_HUMAN E3 ubiquitin-protein ligase RBBP6 OS=Homo sapiens OX=9606 GN=RBBP6 PE=1 SV=1	Q7Z6E9	1778	Q7Z6E9_K1778	76.143	DKEK(0.498)EK(0.498)EK(0.003)DDQK	2	2.4311	0	0	0	0	0	0	0	0	0
sp|Q7Z6E9|RBBP6_HUMAN E3 ubiquitin-protein ligase RBBP6 OS=Homo sapiens OX=9606 GN=RBBP6 PE=1 SV=1	Q7Z6E9	1780	Q7Z6E9_K1780	76.143	DKEK(0.498)EK(0.498)EK(0.003)DDQK	2	2.4311	0	0	0	0	0	0	0	0	0
sp|Q7Z6E9|RBBP6_HUMAN E3 ubiquitin-protein ligase RBBP6 OS=Homo sapiens OX=9606 GN=RBBP6 PE=1 SV=1	Q7Z6E9	1736	Q7Z6E9_K1736	46.819	K(0.003)EK(0.309)K(0.691)K(0.998)HK(0.998)K	2	0.033523	0	0	0	2111.19	970.852	0	0	6285.35	8171.92
sp|Q7Z6E9|RBBP6_HUMAN E3 ubiquitin-protein ligase RBBP6 OS=Homo sapiens OX=9606 GN=RBBP6 PE=1 SV=1	Q7Z6E9	1737	Q7Z6E9_K1737	46.819	K(0.003)EK(0.309)K(0.691)K(0.998)HK(0.998)K	2	0.033523	0	0	0	2111.19	970.852	0	0	6285.35	8171.92
sp|Q7Z6E9|RBBP6_HUMAN E3 ubiquitin-protein ligase RBBP6 OS=Homo sapiens OX=9606 GN=RBBP6 PE=1 SV=1	Q7Z6E9	1739	Q7Z6E9_K1739	46.819	K(0.003)EK(0.309)K(0.691)K(0.998)HK(0.998)K	2	0.033523	0	0	0	2111.19	970.852	0	0	6285.35	8171.92
sp|Q7Z6G8|ANS1B_HUMAN Ankyrin repeat and sterile alpha motif domain-containing protein 1B OS=Homo sapiens OX=9606 GN=ANKS1B PE=1 SV=2	Q7Z6G8	178	Q7Z6G8_K178	50.827	VVK(1)MIISAHPNLMSCNTR	3	2.1931	0	0	0	0	0	0	0	0	0
sp|Q7Z7A1|CNTRL_HUMAN Centriolin OS=Homo sapiens OX=9606 GN=CNTRL PE=1 SV=2	Q7Z7A1	2	Q7Z7A1_K2	59.067	MK(0.857)K(0.143)GSQQK(0.5)IFSK(0.5)AK	2	-0.44563	0	0	0	0	1533.55	0	3309.06	0	0
sp|Q7Z7A1|CNTRL_HUMAN Centriolin OS=Homo sapiens OX=9606 GN=CNTRL PE=1 SV=2	Q7Z7A1	8	Q7Z7A1_K8	59.067	MK(0.857)K(0.143)GSQQK(0.5)IFSK(0.5)AK	2	-0.44563	0	0	0	0	1533.55	0	3309.06	0	0
sp|Q7Z7A1|CNTRL_HUMAN Centriolin OS=Homo sapiens OX=9606 GN=CNTRL PE=1 SV=2	Q7Z7A1	12	Q7Z7A1_K12	59.067	MK(0.857)K(0.143)GSQQK(0.5)IFSK(0.5)AK	2	-0.44563	0	0	0	0	1533.55	0	3309.06	0	0
sp|Q86T65|DAAM2_HUMAN Disheveled-associated activator of morphogenesis 2 OS=Homo sapiens OX=9606 GN=DAAM2 PE=1 SV=3	Q86T65	487	Q86T65_K487	52.527	EEMMRTLNK(0.002)MK(0.803)DK(0.194)LAR	2	1.1627	878.49	3475.42	1071.19	0	0	0	3436.89	0	0
sp|Q86TB3|ALPK2_HUMAN Alpha-protein kinase 2 OS=Homo sapiens OX=9606 GN=ALPK2 PE=1 SV=3	Q86TB3	1741	Q86TB3_K1741	40.857	ILSRVAALRLK(1)LEEK(1)ENIRK(1)NSAFLK	2	1.5015	0	0	0	300.158	574.901	0	0	0	0
sp|Q86TB3|ALPK2_HUMAN Alpha-protein kinase 2 OS=Homo sapiens OX=9606 GN=ALPK2 PE=1 SV=3	Q86TB3	1745	Q86TB3_K1745	40.857	ILSRVAALRLK(1)LEEK(1)ENIRK(1)NSAFLK	2	1.5015	0	0	0	300.158	574.901	0	0	0	0
sp|Q86TB3|ALPK2_HUMAN Alpha-protein kinase 2 OS=Homo sapiens OX=9606 GN=ALPK2 PE=1 SV=3	Q86TB3	1750	Q86TB3_K1750	40.857	ILSRVAALRLK(1)LEEK(1)ENIRK(1)NSAFLK	2	1.5015	0	0	0	300.158	574.901	0	0	0	0
sp|Q86U44|MTA70_HUMAN N6-adenosine-methyltransferase catalytic subunit OS=Homo sapiens OX=9606 GN=METTL3 PE=1 SV=2	Q86U44	12	Q86U44_K12	60.08	SDTWSSIQAHK(1)K	2	-1.0742	0	0	0	0	0	5690.87	2815.64	8770.27	8119.38
sp|Q86UY6|NAA40_HUMAN N-alpha-acetyltransferase 40 OS=Homo sapiens OX=9606 GN=NAA40 PE=1 SV=1	Q86UY6	11	Q86UY6_K11	61.999	AKEK(1)K(1)QK(1)R	1	-0.25524	1989.54	0	1587.63	6505.33	0	4283.48	0	0	0
sp|Q86UY6|NAA40_HUMAN N-alpha-acetyltransferase 40 OS=Homo sapiens OX=9606 GN=NAA40 PE=1 SV=1	Q86UY6	12	Q86UY6_K12	61.999	AKEK(1)K(1)QK(1)R	1	-0.25524	1989.54	0	1587.63	6505.33	0	4283.48	0	0	0
sp|Q86UY6|NAA40_HUMAN N-alpha-acetyltransferase 40 OS=Homo sapiens OX=9606 GN=NAA40 PE=1 SV=1	Q86UY6	14	Q86UY6_K14	61.999	AKEK(1)K(1)QK(1)R	1	-0.25524	1989.54	0	1587.63	6505.33	0	4283.48	0	0	0
sp|Q86VM9|ZCH18_HUMAN Zinc finger CCCH domain-containing protein 18 OS=Homo sapiens OX=9606 GN=ZC3H18 PE=1 SV=2	Q86VM9	638	Q86VM9_K638	83.37	SVK(0.5)K(0.5)PAPPPAPPQATK	3	0.039014	0	0	0	5865.03	8208.09	4155.53	2494.1	9763.41	9952.45
sp|Q86VM9|ZCH18_HUMAN Zinc finger CCCH domain-containing protein 18 OS=Homo sapiens OX=9606 GN=ZC3H18 PE=1 SV=2	Q86VM9	639	Q86VM9_K639	83.37	SVK(0.5)K(0.5)PAPPPAPPQATK	3	0.039014	0	0	0	5865.03	8208.09	4155.53	2494.1	9763.41	9952.45
sp|Q86VQ3|TXND2_HUMAN Thioredoxin domain-containing protein 2 OS=Homo sapiens OX=9606 GN=TXNDC2 PE=1 SV=4	Q86VQ3	19	Q86VQ3_K19	57.499	ELGMESVK(0.043)AGASGK(0.957)PEMR	2	1.981	0	0	0	0	0	0	0	0	0
sp|Q86VZ5|SMS1_HUMAN Phosphatidylcholine:ceramide cholinephosphotransferase 1 OS=Homo sapiens OX=9606 GN=SGMS1 PE=1 SV=3	Q86VZ5	113	Q86VZ5_K113	47.532	K(1)EMIK(1)IPMPELER	2	4.0168	0	0	0	0	0	0	0	0	0
sp|Q86VZ5|SMS1_HUMAN Phosphatidylcholine:ceramide cholinephosphotransferase 1 OS=Homo sapiens OX=9606 GN=SGMS1 PE=1 SV=3	Q86VZ5	117	Q86VZ5_K117	47.532	K(1)EMIK(1)IPMPELER	2	4.0168	0	0	0	0	0	0	0	0	0
sp|Q86W26|NAL10_HUMAN NACHT, LRR and PYD domains-containing protein 10 OS=Homo sapiens OX=9606 GN=NLRP10 PE=1 SV=1	Q86W26	5	Q86W26_K5	58.782	AMAK(1)ARK	2	0.2234	0	0	0	0	0	0	0	0	0
sp|Q86XE3|MICU3_HUMAN Calcium uptake protein 3, mitochondrial OS=Homo sapiens OX=9606 GN=MICU3 PE=1 SV=1	Q86XE3	270	Q86XE3_K270	62.237	K(0.012)NEK(0.989)REIK(1)GDEEK(1)RAMLR	3	-1.1213	0	0	0	0	0	0	0	0	0
sp|Q86XE3|MICU3_HUMAN Calcium uptake protein 3, mitochondrial OS=Homo sapiens OX=9606 GN=MICU3 PE=1 SV=1	Q86XE3	274	Q86XE3_K274	62.237	K(0.012)NEK(0.989)REIK(1)GDEEK(1)RAMLR	3	-1.1213	0	0	0	0	0	0	0	0	0
sp|Q86XE3|MICU3_HUMAN Calcium uptake protein 3, mitochondrial OS=Homo sapiens OX=9606 GN=MICU3 PE=1 SV=1	Q86XE3	279	Q86XE3_K279	62.237	K(0.012)NEK(0.989)REIK(1)GDEEK(1)RAMLR	3	-1.1213	0	0	0	0	0	0	0	0	0
sp|Q86XH1|DRC11_HUMAN Dynein regulatory complex protein 11 OS=Homo sapiens OX=9606 GN=IQCA1 PE=1 SV=1	Q86XH1	358	Q86XH1_K358	64.313	K(1)K(1)EK(0.846)QPK(0.359)K(0.801)AK(0.994)K	2	0.75955	0	0	0	1497.26	723.9	0	0	7796.45	12939.8
sp|Q86XH1|DRC11_HUMAN Dynein regulatory complex protein 11 OS=Homo sapiens OX=9606 GN=IQCA1 PE=1 SV=1	Q86XH1	359	Q86XH1_K359	64.313	K(1)K(1)EK(0.846)QPK(0.359)K(0.801)AK(0.994)K	2	0.75955	0	0	0	1497.26	723.9	0	0	7796.45	12939.8
sp|Q86XH1|DRC11_HUMAN Dynein regulatory complex protein 11 OS=Homo sapiens OX=9606 GN=IQCA1 PE=1 SV=1	Q86XH1	361	Q86XH1_K361	64.313	K(1)K(1)EK(0.846)QPK(0.359)K(0.801)AK(0.994)K	2	0.75955	0	0	0	1497.26	723.9	0	0	7796.45	12939.8
sp|Q86XH1|DRC11_HUMAN Dynein regulatory complex protein 11 OS=Homo sapiens OX=9606 GN=IQCA1 PE=1 SV=1	Q86XH1	365	Q86XH1_K365	64.313	K(1)K(1)EK(0.846)QPK(0.359)K(0.801)AK(0.994)K	2	0.75955	0	0	0	1497.26	723.9	0	0	7796.45	12939.8
sp|Q86XH1|DRC11_HUMAN Dynein regulatory complex protein 11 OS=Homo sapiens OX=9606 GN=IQCA1 PE=1 SV=1	Q86XH1	367	Q86XH1_K367	64.313	K(1)K(1)EK(0.846)QPK(0.359)K(0.801)AK(0.994)K	2	0.75955	0	0	0	1497.26	723.9	0	0	7796.45	12939.8
sp|Q86XJ1|GA2L3_HUMAN GAS2-like protein 3 OS=Homo sapiens OX=9606 GN=GAS2L3 PE=1 SV=1	Q86XJ1	677	Q86XJ1_K677	64.121	K(1)EDDDHYFVMTGSK(0.901)K(0.099)PR	2	-0.78182	0	0	0	0	0	0	2226.18	0	6012.8
sp|Q86XJ1|GA2L3_HUMAN GAS2-like protein 3 OS=Homo sapiens OX=9606 GN=GAS2L3 PE=1 SV=1	Q86XJ1	690	Q86XJ1_K690	62.14	K(1)EDDDHYFVMTGSK(0.901)K(0.099)PR	2	-0.78182	0	0	0	0	0	0	2226.18	0	6012.8
sp|Q86XJ1|GA2L3_HUMAN GAS2-like protein 3 OS=Homo sapiens OX=9606 GN=GAS2L3 PE=1 SV=1	Q86XJ1	691	Q86XJ1_K691	64.121	K(1)EDDDHYFVMTGSK(0.139)K(0.861)PR	2	-0.99357	0	0	0	0	0	0	0	0	0
sp|Q86XP3|DDX42_HUMAN ATP-dependent RNA helicase DDX42 OS=Homo sapiens OX=9606 GN=DDX42 PE=1 SV=1	Q86XP3	930	Q86XP3_K930	94.692	TADGFAVPEPPK(1)R	2	0.17539	0	0	0	26541.3	0	0	11404.1	9496.86	20713
sp|Q86Y91|KI18B_HUMAN Kinesin-like protein KIF18B OS=Homo sapiens OX=9606 GN=KIF18B PE=1 SV=4	Q86Y91	768	Q86Y91_K768	44.811	APVPLFTMK(1)GPK(1)PTSSLPGTSACK	3	-1.1137	433.988	301.151	0	0	505.639	884.791	0	0	642.164
sp|Q86Y91|KI18B_HUMAN Kinesin-like protein KIF18B OS=Homo sapiens OX=9606 GN=KIF18B PE=1 SV=4	Q86Y91	771	Q86Y91_K771	44.811	APVPLFTMK(1)GPK(1)PTSSLPGTSACK	3	-1.1137	433.988	301.151	0	0	505.639	884.791	0	0	642.164
sp|Q8IUR0|TPPC5_HUMAN Trafficking protein particle complex subunit 5 OS=Homo sapiens OX=9606 GN=TRAPPC5 PE=1 SV=1	Q8IUR0	81	Q8IUR0_K81	62.055	ETK(1)VLGALLFVKGAVWK	3	2.0252	0	0	0	0	3582.71	0	0	11781.6	0
sp|Q8IUX7|AEBP1_HUMAN Adipocyte enhancer-binding protein 1 OS=Homo sapiens OX=9606 GN=AEBP1 PE=1 SV=1	Q8IUX7	101	Q8IUX7_K101	74.78	K(0.25)DK(0.759)GPK(0.995)VPK(0.995)ESLEGSPR	2	0.22911	0	0	0	0	0	0	0	0	0
sp|Q8IUX7|AEBP1_HUMAN Adipocyte enhancer-binding protein 1 OS=Homo sapiens OX=9606 GN=AEBP1 PE=1 SV=1	Q8IUX7	104	Q8IUX7_K104	74.78	K(0.25)DK(0.759)GPK(0.995)VPK(0.995)ESLEGSPR	2	0.22911	0	0	0	0	0	0	0	0	0
sp|Q8IUX7|AEBP1_HUMAN Adipocyte enhancer-binding protein 1 OS=Homo sapiens OX=9606 GN=AEBP1 PE=1 SV=1	Q8IUX7	107	Q8IUX7_K107	74.78	K(0.25)DK(0.759)GPK(0.995)VPK(0.995)ESLEGSPR	2	0.22911	0	0	0	0	0	0	0	0	0
sp|Q8IV76|PASD1_HUMAN Circadian clock protein PASD1 OS=Homo sapiens OX=9606 GN=PASD1 PE=1 SV=1	Q8IV76	519	Q8IV76_K519	69.812	K(0.871)K(0.97)LQEQK(0.159)MQEK	2	-0.3293	1329.71	884.619	2135.7	4435.32	4804.76	0	1735.74	4381.36	3770.58
sp|Q8IV76|PASD1_HUMAN Circadian clock protein PASD1 OS=Homo sapiens OX=9606 GN=PASD1 PE=1 SV=1	Q8IV76	520	Q8IV76_K520	69.812	K(0.871)K(0.97)LQEQK(0.159)MQEK	2	-0.3293	1329.71	884.619	2135.7	4435.32	4804.76	0	1735.74	4381.36	3770.58
sp|Q8IVF2|AHNK2_HUMAN Protein AHNAK2 OS=Homo sapiens OX=9606 GN=AHNAK2 PE=1 SV=2	Q8IVF2	5025	Q8IVF2_K5025	40.602	STK(0.051)PGFAMPK(0.955)LALPK(0.995)MK(0.998)ASK	3	-3.9363	0	0	0	0	0	0	0	2890.7	0
sp|Q8IVF2|AHNK2_HUMAN Protein AHNAK2 OS=Homo sapiens OX=9606 GN=AHNAK2 PE=1 SV=2	Q8IVF2	5030	Q8IVF2_K5030	40.602	STK(0.051)PGFAMPK(0.955)LALPK(0.995)MK(0.998)ASK	3	-3.9363	0	0	0	0	0	0	0	2890.7	0
sp|Q8IVF2|AHNK2_HUMAN Protein AHNAK2 OS=Homo sapiens OX=9606 GN=AHNAK2 PE=1 SV=2	Q8IVF2	5032	Q8IVF2_K5032	40.602	STK(0.051)PGFAMPK(0.955)LALPK(0.995)MK(0.998)ASK	3	-3.9363	0	0	0	0	0	0	0	2890.7	0
sp|Q8IVL0|NAV3_HUMAN Neuron navigator 3 OS=Homo sapiens OX=9606 GN=NAV3 PE=1 SV=3	Q8IVL0	9	Q8IVL0_K9	47.574	MPVLGVASK(1)LR	2	-2.6328	0	0	0	17167.1	1576.71	0	0	0	0
sp|Q8IVN3|MSTN1_HUMAN Musculoskeletal embryonic nuclear protein 1 OS=Homo sapiens OX=9606 GN=MUSTN1 PE=3 SV=2	Q8IVN3	12	Q8IVN3_K12	61.56	SQAGAQEAPIK(1)K(1)K	2	-0.22136	576.369	808.598	795.348	0	0	0	0	0	0
sp|Q8IVN3|MSTN1_HUMAN Musculoskeletal embryonic nuclear protein 1 OS=Homo sapiens OX=9606 GN=MUSTN1 PE=3 SV=2	Q8IVN3	13	Q8IVN3_K13	61.56	SQAGAQEAPIK(1)K(1)K	2	-0.22136	576.369	808.598	795.348	0	0	0	0	0	0
sp|Q8IW75|SPA12_HUMAN Serpin A12 OS=Homo sapiens OX=9606 GN=SERPINA12 PE=1 SV=1	Q8IW75	110	Q8IW75_K110	63.185	K(0.033)MPEK(0.967)DLHEGFHYIIHELTQK	2	3.3241	0	0	0	0	0	0	0	0	0
sp|Q8IWC1|MA7D3_HUMAN MAP7 domain-containing protein 3 OS=Homo sapiens OX=9606 GN=MAP7D3 PE=1 SV=2	Q8IWC1	213	Q8IWC1_K213	51.841	QMPLSSAGLQNSVAK(1)R	2	0.97878	0	0	0	0	0	0	0	0	3825.03
sp|Q8IY57|YAF2_HUMAN YY1-associated factor 2 OS=Homo sapiens OX=9606 GN=YAF2 PE=1 SV=3	Q8IY57	75	Q8IY57_K75	104.67	KPRPVSQLVAQQVTQQFVPPTQSK(1)K	3	-0.1466	0	0	0	36959.4	20651.8	16059.5	4734.99	22225.8	0
sp|Q8IY81|SPB1_HUMAN pre-rRNA 2'-O-ribose RNA methyltransferase FTSJ3 OS=Homo sapiens OX=9606 GN=FTSJ3 PE=1 SV=2	Q8IY81	678	Q8IY81_K678	109.42	ILDPEGLALGAVIASSK(1)K	2	-0.48461	0	0	0	10575.6	25930.3	21484.4	15511.3	20864.1	21208.5
sp|Q8IY81|SPB1_HUMAN pre-rRNA 2'-O-ribose RNA methyltransferase FTSJ3 OS=Homo sapiens OX=9606 GN=FTSJ3 PE=1 SV=2	Q8IY81	3	Q8IY81_K3	49.28	MGK(0.485)K(0.485)GK(0.028)VGK(0.002)SRR	2	1.4705	0	0	0	0	0	0	0	0	0
sp|Q8IY81|SPB1_HUMAN pre-rRNA 2'-O-ribose RNA methyltransferase FTSJ3 OS=Homo sapiens OX=9606 GN=FTSJ3 PE=1 SV=2	Q8IY81	4	Q8IY81_K4	49.28	MGK(0.485)K(0.485)GK(0.028)VGK(0.002)SRR	2	1.4705	0	0	0	0	0	0	0	0	0
sp|Q8IYB3|SRRM1_HUMAN Serine/arginine repetitive matrix protein 1 OS=Homo sapiens OX=9606 GN=SRRM1 PE=1 SV=2	Q8IYB3	824	Q8IYB3_K824	59.067	DK(0.002)K(0.341)HK(0.341)K(0.341)HK(0.976)K(0.998)HK	3	1.2269	0	0	0	0	0	0	0	0	0
sp|Q8IYB3|SRRM1_HUMAN Serine/arginine repetitive matrix protein 1 OS=Homo sapiens OX=9606 GN=SRRM1 PE=1 SV=2	Q8IYB3	826	Q8IYB3_K826	59.067	DK(0.002)K(0.341)HK(0.341)K(0.341)HK(0.976)K(0.998)HK	3	1.2269	0	0	0	0	0	0	0	0	0
sp|Q8IYB3|SRRM1_HUMAN Serine/arginine repetitive matrix protein 1 OS=Homo sapiens OX=9606 GN=SRRM1 PE=1 SV=2	Q8IYB3	827	Q8IYB3_K827	59.067	DK(0.002)K(0.341)HK(0.341)K(0.341)HK(0.976)K(0.998)HK	3	1.2269	0	0	0	0	0	0	0	0	0
sp|Q8IYB3|SRRM1_HUMAN Serine/arginine repetitive matrix protein 1 OS=Homo sapiens OX=9606 GN=SRRM1 PE=1 SV=2	Q8IYB3	829	Q8IYB3_K829	59.067	DK(0.002)K(0.341)HK(0.341)K(0.341)HK(0.976)K(0.998)HK	3	1.2269	0	0	0	0	0	0	0	0	0
sp|Q8IYB3|SRRM1_HUMAN Serine/arginine repetitive matrix protein 1 OS=Homo sapiens OX=9606 GN=SRRM1 PE=1 SV=2	Q8IYB3	830	Q8IYB3_K830	59.067	DK(0.002)K(0.341)HK(0.341)K(0.341)HK(0.976)K(0.998)HK	3	1.2269	0	0	0	0	0	0	0	0	0
sp|Q8IYB3|SRRM1_HUMAN Serine/arginine repetitive matrix protein 1 OS=Homo sapiens OX=9606 GN=SRRM1 PE=1 SV=2	Q8IYB3	145	Q8IYB3_K145	141.46	LASMK(1)K(1)QDEDKDKR	2	1.7173	0	0	0	11186.9	5946.28	3382.2	0	18470.3	16677.2
sp|Q8IYB3|SRRM1_HUMAN Serine/arginine repetitive matrix protein 1 OS=Homo sapiens OX=9606 GN=SRRM1 PE=1 SV=2	Q8IYB3	146	Q8IYB3_K146	141.46	LASMK(1)K(1)QDEDKDKR	2	0.15506	0	0	0	11186.9	5946.28	3382.2	0	18470.3	16677.2
sp|Q8IYW2|CFA46_HUMAN Cilia- and flagella-associated protein 46 OS=Homo sapiens OX=9606 GN=CFAP46 PE=2 SV=3	Q8IYW2	488	Q8IYW2_K488	76.24	AEDK(1)AIMAVEQAK(1)K(1)ATPK	2	2.7566	0	0	0	0	0	0	0	0	0
sp|Q8IYW2|CFA46_HUMAN Cilia- and flagella-associated protein 46 OS=Homo sapiens OX=9606 GN=CFAP46 PE=2 SV=3	Q8IYW2	497	Q8IYW2_K497	76.24	AEDK(1)AIMAVEQAK(1)K(1)ATPK	2	2.7566	0	0	0	0	0	0	0	0	0
sp|Q8IYW2|CFA46_HUMAN Cilia- and flagella-associated protein 46 OS=Homo sapiens OX=9606 GN=CFAP46 PE=2 SV=3	Q8IYW2	498	Q8IYW2_K498	76.24	AEDK(1)AIMAVEQAK(1)K(1)ATPK	2	2.7566	0	0	0	0	0	0	0	0	0
sp|Q8IYW2|CFA46_HUMAN Cilia- and flagella-associated protein 46 OS=Homo sapiens OX=9606 GN=CFAP46 PE=2 SV=3	Q8IYW2	2369	Q8IYW2_K2369	41.084	EFSLQMLWNRLHK(1)EETEGGVK(1)K(1)EGRSR	3	-0.68837	1934.97	0	1021.81	1511	2743.36	0	0	2250.91	0
sp|Q8IYW2|CFA46_HUMAN Cilia- and flagella-associated protein 46 OS=Homo sapiens OX=9606 GN=CFAP46 PE=2 SV=3	Q8IYW2	2377	Q8IYW2_K2377	41.084	EFSLQMLWNRLHK(1)EETEGGVK(1)K(1)EGRSR	3	-0.68837	1934.97	0	1021.81	1511	2743.36	0	0	2250.91	0
sp|Q8IYW2|CFA46_HUMAN Cilia- and flagella-associated protein 46 OS=Homo sapiens OX=9606 GN=CFAP46 PE=2 SV=3	Q8IYW2	2378	Q8IYW2_K2378	41.084	EFSLQMLWNRLHK(1)EETEGGVK(1)K(1)EGRSR	3	-0.68837	1934.97	0	1021.81	1511	2743.36	0	0	2250.91	0
sp|Q8N3F8|MILK1_HUMAN MICAL-like protein 1 OS=Homo sapiens OX=9606 GN=MICALL1 PE=1 SV=2	Q8N3F8	638	Q8N3F8_K638	73.593	K(1)PSPAASPATK(1)K(1)ATK	2	-0.43008	0	0	0	6827.74	14912.5	0	0	85910.4	68575.4
sp|Q8N3F8|MILK1_HUMAN MICAL-like protein 1 OS=Homo sapiens OX=9606 GN=MICALL1 PE=1 SV=2	Q8N3F8	648	Q8N3F8_K648	73.593	K(1)PSPAASPATK(1)K(1)ATK	2	-0.43008	0	0	0	6827.74	14912.5	0	0	85910.4	68575.4
sp|Q8N3F8|MILK1_HUMAN MICAL-like protein 1 OS=Homo sapiens OX=9606 GN=MICALL1 PE=1 SV=2	Q8N3F8	649	Q8N3F8_K649	73.593	K(1)PSPAASPATK(1)K(1)ATK	2	-0.43008	0	0	0	6827.74	14912.5	0	0	85910.4	68575.4
sp|Q8N488|RYBP_HUMAN RING1 and YY1-binding protein OS=Homo sapiens OX=9606 GN=RYBP PE=1 SV=2	Q8N488	77	Q8N488_K77	105.57	INSQLVAQQVAQQYATPPPPK(1)K	2	0.19566	0	0	0	49061.9	24591.1	28469.7	20165.7	34304.6	25954
sp|Q8N573|OXR1_HUMAN Oxidation resistance protein 1 OS=Homo sapiens OX=9606 GN=OXR1 PE=1 SV=2	Q8N573	5	Q8N573_K5	55.98	TK(0.004)DK(0.996)NSPGLK(1)K	2	0.93082	0	0	0	0	0	0	0	0	0
sp|Q8N573|OXR1_HUMAN Oxidation resistance protein 1 OS=Homo sapiens OX=9606 GN=OXR1 PE=1 SV=2	Q8N573	11	Q8N573_K11	55.98	TK(0.004)DK(0.996)NSPGLK(1)K	2	0.93082	0	0	0	0	0	0	0	0	0
sp|Q8N5V2|NGEF_HUMAN Ephexin-1 OS=Homo sapiens OX=9606 GN=NGEF PE=1 SV=2	Q8N5V2	582	Q8N5V2_K582	50.354	EATYMLK(1)ASSQSEMK(1)R	2	-1.0259	0	0	0	0	0	0	0	0	0
sp|Q8N5V2|NGEF_HUMAN Ephexin-1 OS=Homo sapiens OX=9606 GN=NGEF PE=1 SV=2	Q8N5V2	590	Q8N5V2_K590	50.354	EATYMLK(1)ASSQSEMK(1)R	2	-1.0259	0	0	0	0	0	0	0	0	0
sp|Q8N6N3|CA052_HUMAN UPF0690 protein C1orf52 OS=Homo sapiens OX=9606 GN=C1orf52 PE=1 SV=1	Q8N6N3	144	Q8N6N3_K144	105.03	WSNIYEDNGDDAPQNAK(1)K	2	0.2793	0	0	0	10802.2	6261.99	4651.77	4087.69	10477.8	12294.7
sp|Q8N6Q8|MET25_HUMAN Probable methyltransferase-like protein 25 OS=Homo sapiens OX=9606 GN=METTL25 PE=2 SV=2	Q8N6Q8	225	Q8N6Q8_K225	59.306	HWK(1)LCHAQSRLDVNGLALK(1)MAK	2	2.1047	147.438	0	0	0	0	0	0	0	0
sp|Q8N6Q8|MET25_HUMAN Probable methyltransferase-like protein 25 OS=Homo sapiens OX=9606 GN=METTL25 PE=2 SV=2	Q8N6Q8	241	Q8N6Q8_K241	59.306	HWK(1)LCHAQSRLDVNGLALK(1)MAK	2	2.1047	147.438	0	0	0	0	0	0	0	0
sp|Q8N752|KC1AL_HUMAN Casein kinase I isoform alpha-like OS=Homo sapiens OX=9606 GN=CSNK1A1L PE=2 SV=2	Q8N752	229	Q8N752_K229	40.015	AMTK(1)K(1)QK(1)YEK(1)ISEK	2	0.023573	1985.54	3913.53	4022.09	0	0	0	0	0	2859.11
sp|Q8N752|KC1AL_HUMAN Casein kinase I isoform alpha-like OS=Homo sapiens OX=9606 GN=CSNK1A1L PE=2 SV=2	Q8N752	230	Q8N752_K230	40.015	AMTK(1)K(1)QK(1)YEK(1)ISEK	2	0.023573	1985.54	3913.53	4022.09	0	0	0	0	0	2859.11
sp|Q8N752|KC1AL_HUMAN Casein kinase I isoform alpha-like OS=Homo sapiens OX=9606 GN=CSNK1A1L PE=2 SV=2	Q8N752	232	Q8N752_K232	40.015	AMTK(1)K(1)QK(1)YEK(1)ISEK	2	0.023573	1985.54	3913.53	4022.09	0	0	0	0	0	2859.11
sp|Q8N752|KC1AL_HUMAN Casein kinase I isoform alpha-like OS=Homo sapiens OX=9606 GN=CSNK1A1L PE=2 SV=2	Q8N752	235	Q8N752_K235	40.015	AMTK(1)K(1)QK(1)YEK(1)ISEK	2	0.023573	1985.54	3913.53	4022.09	0	0	0	0	0	2859.11
sp|Q8N841|TTLL6_HUMAN Tubulin polyglutamylase TTLL6 OS=Homo sapiens OX=9606 GN=TTLL6 PE=1 SV=3	Q8N841	542	Q8N841_K542	40.689	REK(0.968)K(0.741)PFQMK(0.31)K(0.991)K(0.991)VEMQGESAGEQVR	3	-1.8344	0	0	0	0	0	0	0	0	0
sp|Q8N841|TTLL6_HUMAN Tubulin polyglutamylase TTLL6 OS=Homo sapiens OX=9606 GN=TTLL6 PE=1 SV=3	Q8N841	543	Q8N841_K543	40.689	REK(0.968)K(0.741)PFQMK(0.31)K(0.991)K(0.991)VEMQGESAGEQVR	3	-1.8344	0	0	0	0	0	0	0	0	0
sp|Q8N841|TTLL6_HUMAN Tubulin polyglutamylase TTLL6 OS=Homo sapiens OX=9606 GN=TTLL6 PE=1 SV=3	Q8N841	549	Q8N841_K549	40.689	REK(0.968)K(0.741)PFQMK(0.31)K(0.991)K(0.991)VEMQGESAGEQVR	3	-1.8344	0	0	0	0	0	0	0	0	0
sp|Q8N841|TTLL6_HUMAN Tubulin polyglutamylase TTLL6 OS=Homo sapiens OX=9606 GN=TTLL6 PE=1 SV=3	Q8N841	550	Q8N841_K550	40.689	REK(0.968)K(0.741)PFQMK(0.31)K(0.991)K(0.991)VEMQGESAGEQVR	3	-1.8344	0	0	0	0	0	0	0	0	0
sp|Q8N9T8|KRI1_HUMAN Protein KRI1 homolog OS=Homo sapiens OX=9606 GN=KRI1 PE=1 SV=3	Q8N9T8	311	Q8N9T8_K311	150.09	FEEPDSASVK(1)TYPR	2	-0.036377	0	0	0	18074	18334.9	22233.4	24351.3	64612.3	59755.5
sp|Q8NAP3|ZBT38_HUMAN Zinc finger and BTB domain-containing protein 38 OS=Homo sapiens OX=9606 GN=ZBTB38 PE=1 SV=2	Q8NAP3	977	Q8NAP3_K977	65.695	PFEEEETK(1)EMPK	3	-1.6631	0	0	0	0	4274.86	5190.62	0	11525.9	7075.33
sp|Q8NC51|SERB1_HUMAN SERPINE1 mRNA-binding protein 1 OS=Homo sapiens OX=9606 GN=SERBP1 PE=1 SV=2	Q8NC51	68	Q8NC51_K68	187.11	SAAQAAAQTNSNAAGK(1)QLR	2	0.77469	0	0	0	6331.7	6691.1	4096.79	6859.08	16346.4	22219.7
sp|Q8NCA5|FA98A_HUMAN Protein FAM98A OS=Homo sapiens OX=9606 GN=FAM98A PE=1 SV=2;sp|Q52LJ0|FA98B_HUMAN Protein FAM98B OS=Homo sapiens OX=9606 GN=FAM98B PE=1 SV=2	Q8NCA5;Q52LJ0	324;327	Q8NCA5_K324	71.742	GGRPNEIEPPPPEMPPWQK(1)R	3	-0.11586	0	0	0	14666	9343.85	5571.16	6505.35	18229.4	12451.6
sp|Q8NCG5|CHST4_HUMAN Carbohydrate sulfotransferase 4 OS=Homo sapiens OX=9606 GN=CHST4 PE=1 SV=2	Q8NCG5	5	Q8NCG5_K5	52.683	MLLPK(0.5)K(0.5)MK	2	0.50629	5527.21	3042.04	5326.84	12358.1	18229.8	0	0	10006	10005.3
sp|Q8NCG5|CHST4_HUMAN Carbohydrate sulfotransferase 4 OS=Homo sapiens OX=9606 GN=CHST4 PE=1 SV=2	Q8NCG5	6	Q8NCG5_K6	52.683	MLLPK(0.5)K(0.5)MK	2	0.50629	5527.21	3042.04	5326.84	12358.1	18229.8	0	0	10006	10005.3
sp|Q8NCU4|CC191_HUMAN Coiled-coil domain-containing protein 191 OS=Homo sapiens OX=9606 GN=CCDC191 PE=2 SV=1	Q8NCU4	722	Q8NCU4_K722	130.27	MK(1)ELEK(1)QK(1)R	2	0.072801	0	0	0	0	0	25582.4	0	0	0
sp|Q8NCU4|CC191_HUMAN Coiled-coil domain-containing protein 191 OS=Homo sapiens OX=9606 GN=CCDC191 PE=2 SV=1	Q8NCU4	726	Q8NCU4_K726	130.27	MK(1)ELEK(1)QK(1)R	2	0.072801	0	0	0	0	0	25582.4	0	0	0
sp|Q8NCU4|CC191_HUMAN Coiled-coil domain-containing protein 191 OS=Homo sapiens OX=9606 GN=CCDC191 PE=2 SV=1	Q8NCU4	728	Q8NCU4_K728	130.27	MK(1)ELEK(1)QK(1)R	2	0.072801	0	0	0	0	0	25582.4	0	0	0
sp|Q8NDD1|CA131_HUMAN Uncharacterized protein C1orf131 OS=Homo sapiens OX=9606 GN=C1orf131 PE=1 SV=4	Q8NDD1	205	Q8NDD1_K205	66.702	AIMLGAK(0.003)PPK(0.997)K(1)SYVNYK	3	-0.454	0	0	0	7673.63	12737.5	3723.01	0	21136.6	14512.7
sp|Q8NDD1|CA131_HUMAN Uncharacterized protein C1orf131 OS=Homo sapiens OX=9606 GN=C1orf131 PE=1 SV=4	Q8NDD1	206	Q8NDD1_K206	66.702	AIMLGAK(0.003)PPK(0.997)K(1)SYVNYK	3	-0.454	0	0	0	7673.63	12737.5	3723.01	0	21136.6	14512.7
sp|Q8NDD1|CA131_HUMAN Uncharacterized protein C1orf131 OS=Homo sapiens OX=9606 GN=C1orf131 PE=1 SV=4	Q8NDD1	239	Q8NDD1_K239	173.59	LAQETDIFK(1)K(1)K	2	-1.0663	0	0	0	0	0	0	24554	27081.5	22758.8
sp|Q8NDD1|CA131_HUMAN Uncharacterized protein C1orf131 OS=Homo sapiens OX=9606 GN=C1orf131 PE=1 SV=4	Q8NDD1	240	Q8NDD1_K240	173.59	LAQETDIFK(1)K(1)K	2	-1.0663	0	0	0	0	0	0	24554	27081.5	22758.8
sp|Q8NDH2|CC168_HUMAN Leucine-rich repeat transmembrane protein CCDC168 OS=Homo sapiens OX=9606 GN=CCDC168 PE=2 SV=3	Q8NDH2	5051	Q8NDH2_K5051	56.81	LQWK(1)SK(1)EQK(1)R	1	-1.0962	30186.8	15730.9	30304.2	45560.2	47363.6	58753.2	31996.2	0	65057
sp|Q8NDH2|CC168_HUMAN Leucine-rich repeat transmembrane protein CCDC168 OS=Homo sapiens OX=9606 GN=CCDC168 PE=2 SV=3	Q8NDH2	5053	Q8NDH2_K5053	56.81	LQWK(1)SK(1)EQK(1)R	1	-1.0962	30186.8	15730.9	30304.2	45560.2	47363.6	58753.2	31996.2	0	65057
sp|Q8NDH2|CC168_HUMAN Leucine-rich repeat transmembrane protein CCDC168 OS=Homo sapiens OX=9606 GN=CCDC168 PE=2 SV=3	Q8NDH2	5056	Q8NDH2_K5056	56.81	LQWK(1)SK(1)EQK(1)R	1	-1.0962	30186.8	15730.9	30304.2	45560.2	47363.6	58753.2	31996.2	0	65057
sp|Q8NDT2|RB15B_HUMAN Putative RNA-binding protein 15B OS=Homo sapiens OX=9606 GN=RBM15B PE=1 SV=3	Q8NDT2	40	Q8NDT2_K40	90.697	AAHK(1)ASGGAK(1)HPVPAR	2	0.66468	0	0	0	3637.85	1732.55	966.442	0	2884.11	0
sp|Q8NDT2|RB15B_HUMAN Putative RNA-binding protein 15B OS=Homo sapiens OX=9606 GN=RBM15B PE=1 SV=3	Q8NDT2	46	Q8NDT2_K46	90.697	AAHK(1)ASGGAK(1)HPVPAR	2	0.66468	0	0	0	3637.85	1732.55	966.442	0	2884.11	0
sp|Q8NGP4|OR5M3_HUMAN Olfactory receptor 5M3 OS=Homo sapiens OX=9606 GN=OR5M3 PE=2 SV=2	Q8NGP4	293	Q8NGP4_K293	54.157	NK(0.997)DVK(0.002)K(0.001)AMMK	2	-1.167	0	0	0	684.259	0	0	0	0	0
sp|Q8NGP4|OR5M3_HUMAN Olfactory receptor 5M3 OS=Homo sapiens OX=9606 GN=OR5M3 PE=2 SV=2	Q8NGP4	296	Q8NGP4_K296	50.607	NK(0.01)DVK(0.868)K(0.123)AMMK	1	-1.4402	0	0	0	0	4116.82	0	0	0	0
sp|Q8NHW5|RLA0L_HUMAN Putative ribosomal protein uL10-like OS=Homo sapiens OX=9606 GN=RPLP0P6 PE=5 SV=1	Q8NHW5	50	Q8NHW5_K50	45.79	MSLRGK(1)VVVLMGK(1)NTMMRK(1)AIR	2	-4.2177	0	0	0	0	0	0	0	0	0
sp|Q8NHW5|RLA0L_HUMAN Putative ribosomal protein uL10-like OS=Homo sapiens OX=9606 GN=RPLP0P6 PE=5 SV=1	Q8NHW5	57	Q8NHW5_K57	45.79	MSLRGK(1)VVVLMGK(1)NTMMRK(1)AIR	2	-4.2177	0	0	0	0	0	0	0	0	0
sp|Q8NHW5|RLA0L_HUMAN Putative ribosomal protein uL10-like OS=Homo sapiens OX=9606 GN=RPLP0P6 PE=5 SV=1	Q8NHW5	63	Q8NHW5_K63	45.79	MSLRGK(1)VVVLMGK(1)NTMMRK(1)AIR	2	-4.2177	0	0	0	0	0	0	0	0	0
sp|Q8NI27|THOC2_HUMAN THO complex subunit 2 OS=Homo sapiens OX=9606 GN=THOC2 PE=1 SV=2	Q8NI27	1558	Q8NI27_K1558	91.313	ISSGGK(1)K(1)ESR	2	-0.75253	3581.11	5513.68	0	41387.3	31742.3	0	0	0	37451.1
sp|Q8NI27|THOC2_HUMAN THO complex subunit 2 OS=Homo sapiens OX=9606 GN=THOC2 PE=1 SV=2	Q8NI27	1559	Q8NI27_K1559	91.313	ISSGGK(1)K(1)ESR	2	-0.75253	3581.11	5513.68	0	41387.3	31742.3	0	0	0	37451.1
sp|Q8TAD8|SNIP1_HUMAN Smad nuclear-interacting protein 1 OS=Homo sapiens OX=9606 GN=SNIP1 PE=1 SV=1	Q8TAD8	2	Q8TAD8_K2	52.247	MK(1)AVK(1)SER	2	0.53392	0	0	0	13501.2	15823.6	14699.5	12489.3	11002.9	0
sp|Q8TAD8|SNIP1_HUMAN Smad nuclear-interacting protein 1 OS=Homo sapiens OX=9606 GN=SNIP1 PE=1 SV=1	Q8TAD8	5	Q8TAD8_K5	52.247	MK(1)AVK(1)SER	2	0.53392	0	0	0	13501.2	15823.6	14699.5	12489.3	11002.9	0
sp|Q8TAQ9|SUN3_HUMAN SUN domain-containing protein 3 OS=Homo sapiens OX=9606 GN=SUN3 PE=1 SV=4	Q8TAQ9	4	Q8TAQ9_K4	56.122	MSGK(1)TKAR	2	-2.0489	0	0	0	0	0	0	0	0	0
sp|Q8TAW3|ZN671_HUMAN Zinc finger protein 671 OS=Homo sapiens OX=9606 GN=ZNF671 PE=2 SV=2	Q8TAW3	230	Q8TAW3_K230	83.647	DSVK(1)SCRVHVPEK	2	-1.119	0	0	0	0	0	11366.4	7451.39	0	0
sp|Q8TDI7|TMC2_HUMAN Transmembrane channel-like protein 2 OS=Homo sapiens OX=9606 GN=TMC2 PE=2 SV=3	Q8TDI7	204	Q8TDI7_K204	53.683	GK(1)QLYAYK(1)MLMAK(1)K	2	-1.7355	0	0	0	0	0	0	0	0	0
sp|Q8TDI7|TMC2_HUMAN Transmembrane channel-like protein 2 OS=Homo sapiens OX=9606 GN=TMC2 PE=2 SV=3	Q8TDI7	210	Q8TDI7_K210	53.683	GK(1)QLYAYK(1)MLMAK(1)K	2	-1.7355	0	0	0	0	0	0	0	0	0
sp|Q8TDI7|TMC2_HUMAN Transmembrane channel-like protein 2 OS=Homo sapiens OX=9606 GN=TMC2 PE=2 SV=3	Q8TDI7	215	Q8TDI7_K215	53.683	GK(1)QLYAYK(1)MLMAK(1)K	2	-1.7355	0	0	0	0	0	0	0	0	0
sp|Q8TDN6|BRX1_HUMAN Ribosome biogenesis protein BRX1 homolog OS=Homo sapiens OX=9606 GN=BRIX1 PE=1 SV=2	Q8TDN6	322	Q8TDN6_K322	71.118	TLLPHDPTADVFVTPAEEK(0.046)PIEIQWVK(0.581)PEPK(0.373)VDLK	5	0.22252	0	0	0	0	0	0	0	10423.7	0
sp|Q8TEJ3|SH3R3_HUMAN E3 ubiquitin-protein ligase SH3RF3 OS=Homo sapiens OX=9606 GN=SH3RF3 PE=1 SV=2	Q8TEJ3	712	Q8TEJ3_K712	51.286	LDEK(0.994)K(0.994)SEK(0.325)K(0.325)EK(0.215)K(0.147)SGLLK	2	0.93908	0	0	0	0	1501.51	21627	0	0	0
sp|Q8TEJ3|SH3R3_HUMAN E3 ubiquitin-protein ligase SH3RF3 OS=Homo sapiens OX=9606 GN=SH3RF3 PE=1 SV=2	Q8TEJ3	713	Q8TEJ3_K713	51.286	LDEK(0.994)K(0.994)SEK(0.325)K(0.325)EK(0.215)K(0.147)SGLLK	2	0.93908	0	0	0	0	1501.51	21627	0	0	0
sp|Q8TEJ3|SH3R3_HUMAN E3 ubiquitin-protein ligase SH3RF3 OS=Homo sapiens OX=9606 GN=SH3RF3 PE=1 SV=2	Q8TEJ3	716	Q8TEJ3_K716	51.286	LDEK(0.994)K(0.994)SEK(0.325)K(0.325)EK(0.215)K(0.147)SGLLK	2	0.93908	0	0	0	0	0	0	0	0	0
sp|Q8TEJ3|SH3R3_HUMAN E3 ubiquitin-protein ligase SH3RF3 OS=Homo sapiens OX=9606 GN=SH3RF3 PE=1 SV=2	Q8TEJ3	717	Q8TEJ3_K717	51.286	LDEK(0.994)K(0.994)SEK(0.325)K(0.325)EK(0.215)K(0.147)SGLLK	2	0.93908	0	0	0	0	0	0	0	0	0
sp|Q8TEM1|PO210_HUMAN Nuclear pore membrane glycoprotein 210 OS=Homo sapiens OX=9606 GN=NUP210 PE=1 SV=3	Q8TEM1	1547	Q8TEM1_K1547	54.292	TYK(1)EVVVSVPQRIMAR	3	1.2907	0	0	0	0	0	0	1329.39	0	0
sp|Q8TES7|FBF1_HUMAN Fas-binding factor 1 OS=Homo sapiens OX=9606 GN=FBF1 PE=1 SV=2	Q8TES7	125	Q8TES7_K125	68.132	PAGGAIPTK(1)K	2	-1.5332	0	0	0	0	0	0	0	0	525.531
sp|Q8TEW8|PAR3L_HUMAN Partitioning defective 3 homolog B OS=Homo sapiens OX=9606 GN=PARD3B PE=1 SV=2	Q8TEW8	844	Q8TEW8_K844	48.998	K(1)EK(1)GK(1)LK(1)VK(1)EK(1)K	2	0.5317	1643.33	1956.08	0	0	0	0	3595.98	3009.53	0
sp|Q8TEW8|PAR3L_HUMAN Partitioning defective 3 homolog B OS=Homo sapiens OX=9606 GN=PARD3B PE=1 SV=2	Q8TEW8	846	Q8TEW8_K846	48.998	K(1)EK(1)GK(1)LK(1)VK(1)EK(1)K	2	0.5317	1643.33	1956.08	0	0	0	0	3595.98	3009.53	0
sp|Q8TEW8|PAR3L_HUMAN Partitioning defective 3 homolog B OS=Homo sapiens OX=9606 GN=PARD3B PE=1 SV=2	Q8TEW8	848	Q8TEW8_K848	48.998	K(1)EK(1)GK(1)LK(1)VK(1)EK(1)K	2	0.5317	1643.33	1956.08	0	0	0	0	3595.98	3009.53	0
sp|Q8TEW8|PAR3L_HUMAN Partitioning defective 3 homolog B OS=Homo sapiens OX=9606 GN=PARD3B PE=1 SV=2	Q8TEW8	850	Q8TEW8_K850	48.998	K(1)EK(1)GK(1)LK(1)VK(1)EK(1)K	2	0.5317	1643.33	1956.08	0	0	0	0	3595.98	3009.53	0
sp|Q8TEW8|PAR3L_HUMAN Partitioning defective 3 homolog B OS=Homo sapiens OX=9606 GN=PARD3B PE=1 SV=2	Q8TEW8	852	Q8TEW8_K852	48.998	K(1)EK(1)GK(1)LK(1)VK(1)EK(1)K	2	0.5317	1643.33	1956.08	0	0	0	0	3595.98	3009.53	0
sp|Q8TEW8|PAR3L_HUMAN Partitioning defective 3 homolog B OS=Homo sapiens OX=9606 GN=PARD3B PE=1 SV=2	Q8TEW8	854	Q8TEW8_K854	48.998	K(1)EK(1)GK(1)LK(1)VK(1)EK(1)K	2	0.5317	1643.33	1956.08	0	0	0	0	3595.98	3009.53	0
sp|Q8TF40|FNIP1_HUMAN Folliculin-interacting protein 1 OS=Homo sapiens OX=9606 GN=FNIP1 PE=1 SV=3	Q8TF40	375	Q8TF40_K375	51.135	LKSAIEQAMK(1)MSR	2	-1.6433	0	0	0	0	3648.84	0	4002.59	0	0
sp|Q8WU90|ZC3HF_HUMAN Zinc finger CCCH domain-containing protein 15 OS=Homo sapiens OX=9606 GN=ZC3H15 PE=1 SV=1	Q8WU90	4	Q8WU90_K4	81.771	PPK(0.572)K(0.428)QAQAGGSK	2	0.25537	0	0	0	10425.2	7528.07	6051.85	8790.55	14530.9	17251.6
sp|Q8WU90|ZC3HF_HUMAN Zinc finger CCCH domain-containing protein 15 OS=Homo sapiens OX=9606 GN=ZC3H15 PE=1 SV=1	Q8WU90	5	Q8WU90_K5	99.973	PPK(0.128)K(0.872)QAQAGGSK	2	0.079843	0	0	0	10425.2	7612.67	6051.85	8790.55	14530.9	18489
sp|Q8WVP5|TP8L1_HUMAN Tumor necrosis factor alpha-induced protein 8-like protein 1 OS=Homo sapiens OX=9606 GN=TNFAIP8L1 PE=1 SV=2	Q8WVP5	15	Q8WVP5_K15	49.528	DTFSTKSLALQAQK(0.986)K(0.872)LLSK(0.141)MASK	3	-1.4267	0	0	0	0	0	0	0	0	0
sp|Q8WVP5|TP8L1_HUMAN Tumor necrosis factor alpha-induced protein 8-like protein 1 OS=Homo sapiens OX=9606 GN=TNFAIP8L1 PE=1 SV=2	Q8WVP5	16	Q8WVP5_K16	49.528	DTFSTKSLALQAQK(0.986)K(0.872)LLSK(0.141)MASK	3	-1.4267	0	0	0	0	0	0	0	0	0
sp|Q8WWQ0|PHIP_HUMAN PH-interacting protein OS=Homo sapiens OX=9606 GN=PHIP PE=1 SV=2	Q8WWQ0	1581	Q8WWQ0_K1581	70.98	NNSAK(0.405)ENMEK(0.63)EK(0.964)PVK(0.001)R	2	0.10303	1660.57	995.962	0	0	0	2333.54	0	0	0
sp|Q8WWQ0|PHIP_HUMAN PH-interacting protein OS=Homo sapiens OX=9606 GN=PHIP PE=1 SV=2	Q8WWQ0	1583	Q8WWQ0_K1583	70.98	NNSAK(0.405)ENMEK(0.63)EK(0.964)PVK(0.001)R	2	0.10303	1660.57	995.962	0	0	0	2333.54	0	0	0
sp|Q8WWY3|PRP31_HUMAN U4/U6 small nuclear ribonucleoprotein Prp31 OS=Homo sapiens OX=9606 GN=PRPF31 PE=1 SV=2	Q8WWY3	338	Q8WWY3_K338	102.24	WQEPPPVK(1)QVKPLPAPLDGQR	3	1.0022	0	4651.06	0	0	98237.2	66154.4	25239.1	79324.5	62844
sp|Q8WXI9|P66B_HUMAN Transcriptional repressor p66-beta OS=Homo sapiens OX=9606 GN=GATAD2B PE=1 SV=1	Q8WXI9	30	Q8WXI9_K30	77.191	SLDPADERDDVLAK(1)R	3	-0.39808	0	0	0	9560	9927.75	6674.12	8451.71	23146.3	15096.6
sp|Q8WXX5|DNJC9_HUMAN DnaJ homolog subfamily C member 9 OS=Homo sapiens OX=9606 GN=DNAJC9 PE=1 SV=1	Q8WXX5	217	Q8WXX5_K217	143.94	ELGLDEGVDSLK(1)AAIQSR	2	-0.31883	0	0	0	0	0	0	14175.2	0	7946.49
sp|Q92522|H1X_HUMAN Histone H1.10 OS=Homo sapiens OX=9606 GN=H1-10 PE=1 SV=1	Q92522	143	Q92522_K143	98.407	GAPAAATAPAPTAHK(1)AK	2	0.046183	0	0	0	0	0	0	0	2450.13	2255.18
sp|Q92522|H1X_HUMAN Histone H1.10 OS=Homo sapiens OX=9606 GN=H1-10 PE=1 SV=1	Q92522	207	Q92522_K207	98.458	PSVPK(1)VPK(1)GR	2	0.34779	0	0	0	0	0	0	6578.02	12716.8	15545.9
sp|Q92522|H1X_HUMAN Histone H1.10 OS=Homo sapiens OX=9606 GN=H1-10 PE=1 SV=1	Q92522	210	Q92522_K210	98.458	PSVPK(1)VPK(1)GR	2	0.34779	0	0	0	0	0	0	6578.02	12716.8	15545.9
sp|Q92576|PHF3_HUMAN PHD finger protein 3 OS=Homo sapiens OX=9606 GN=PHF3 PE=1 SV=3	Q92576	546	Q92576_K546	58.817	NTDVPESQQNFHRPVK(1)VR	4	-0.11412	0	0	0	0	16265.7	6209.74	0	0	0
sp|Q92608|DOCK2_HUMAN Dedicator of cytokinesis protein 2 OS=Homo sapiens OX=9606 GN=DOCK2 PE=1 SV=2	Q92608	304	Q92608_K304	40.477	VGK(1)MDLK(1)DTGAK(1)K(1)CTQGLR	2	0.69095	11976.9	2244.58	2704.98	0	0	0	0	0	0
sp|Q92608|DOCK2_HUMAN Dedicator of cytokinesis protein 2 OS=Homo sapiens OX=9606 GN=DOCK2 PE=1 SV=2	Q92608	308	Q92608_K308	40.477	VGK(1)MDLK(1)DTGAK(1)K(1)CTQGLR	2	0.69095	11976.9	2244.58	2704.98	0	0	0	0	0	0
sp|Q92608|DOCK2_HUMAN Dedicator of cytokinesis protein 2 OS=Homo sapiens OX=9606 GN=DOCK2 PE=1 SV=2	Q92608	313	Q92608_K313	40.477	VGK(1)MDLK(1)DTGAK(1)K(1)CTQGLR	2	0.69095	11976.9	2244.58	2704.98	0	0	0	0	0	0
sp|Q92608|DOCK2_HUMAN Dedicator of cytokinesis protein 2 OS=Homo sapiens OX=9606 GN=DOCK2 PE=1 SV=2	Q92608	314	Q92608_K314	40.477	VGK(1)MDLK(1)DTGAK(1)K(1)CTQGLR	2	0.69095	11976.9	2244.58	2704.98	0	0	0	0	0	0
sp|Q92619|HMHA1_HUMAN Rho GTPase-activating protein 45 OS=Homo sapiens OX=9606 GN=ARHGAP45 PE=1 SV=2	Q92619	17	Q92619_K17	73.039	TPSISK(1)K	1	0.2424	0	0	0	92805.2	79255	0	0	0	130400
sp|Q96BK5|PINX1_HUMAN PIN2/TERF1-interacting telomerase inhibitor 1 OS=Homo sapiens OX=9606 GN=PINX1 PE=1 SV=2	Q96BK5	231	Q96BK5_K231	131.17	DVESYLQPK(1)AK(1)R	2	-0.26351	0	0	0	0	21702.2	0	0	0	26088.1
sp|Q96BK5|PINX1_HUMAN PIN2/TERF1-interacting telomerase inhibitor 1 OS=Homo sapiens OX=9606 GN=PINX1 PE=1 SV=2	Q96BK5	233	Q96BK5_K233	131.17	DVESYLQPK(1)AK(1)R	2	-0.26351	0	0	0	0	21702.2	0	0	0	26088.1
sp|Q96BZ8|LENG1_HUMAN Leukocyte receptor cluster member 1 OS=Homo sapiens OX=9606 GN=LENG1 PE=1 SV=2	Q96BZ8	32	Q96BZ8_K32	53.569	RDEAQAREEEK(1)ERERR	2	-1.4971	0	0	0	0	0	0	2482.72	0	0
sp|Q96CB8|INT12_HUMAN Integrator complex subunit 12 OS=Homo sapiens OX=9606 GN=INTS12 PE=1 SV=1	Q96CB8	446	Q96CB8_K446	60.641	GPTSQESQLNAMK(1)R	2	-0.77858	0	0	0	0	0	0	2041.18	0	0
sp|Q96JP5|ZFP91_HUMAN E3 ubiquitin-protein ligase ZFP91 OS=Homo sapiens OX=9606 GN=ZFP91 PE=1 SV=1;sp|Q96CK0|ZN653_HUMAN Zinc finger protein 653 OS=Homo sapiens OX=9606 GN=ZNF653 PE=1 SV=1	Q96JP5;Q96CK0	420;576	Q96JP5_K420	57.177	ASLNWHMK(1)K	2	2.7281	0	0	0	283.563	0	0	0	0	0
sp|Q96CT7|CC124_HUMAN Coiled-coil domain-containing protein 124 OS=Homo sapiens OX=9606 GN=CCDC124 PE=1 SV=1	Q96CT7	185	Q96CT7_K185	69.714	LK(1)QENPNMRLSQLK	2	0.27306	7033.65	7044.81	8530.16	20226	0	0	0	14039.4	6264.98
sp|Q96CW1|AP2M1_HUMAN AP-2 complex subunit mu OS=Homo sapiens OX=9606 GN=AP2M1 PE=1 SV=2	Q96CW1	235	Q96CW1_K235	43.681	QGK(0.453)GTADETSK(0.797)SGK(0.75)QSIAIDDCTFHQCVR	3	-1.1613	4289.01	0	3649.3	0	0	0	0	0	0
sp|Q96CW1|AP2M1_HUMAN AP-2 complex subunit mu OS=Homo sapiens OX=9606 GN=AP2M1 PE=1 SV=2	Q96CW1	238	Q96CW1_K238	43.681	QGK(0.453)GTADETSK(0.797)SGK(0.75)QSIAIDDCTFHQCVR	3	-1.1613	4289.01	0	3649.3	0	0	0	0	0	0
sp|Q96D71|REPS1_HUMAN RalBP1-associated Eps domain-containing protein 1 OS=Homo sapiens OX=9606 GN=REPS1 PE=1 SV=3	Q96D71	462	Q96D71_K462	59.84	MTPSK(1)IHMQEMELK	2	4.3627	0	0	0	0	0	0	0	0	0
sp|Q96DF8|ESS2_HUMAN Splicing factor ESS-2 homolog OS=Homo sapiens OX=9606 GN=ESS2 PE=1 SV=1	Q96DF8	239	Q96DF8_K239	63.302	NSLMYYPEGVPDEEQLFK(0.958)K(0.042)PR	3	-0.057869	0	0	0	5795.97	0	0	4148.37	15069.5	7113.54
sp|Q96DM1|PGBD4_HUMAN PiggyBac transposable element-derived protein 4 OS=Homo sapiens OX=9606 GN=PGBD4 PE=2 SV=3	Q96DM1	366	Q96DM1_K366	89.369	QIPNDLK(1)K	2	-0.98312	0	0	0	0	285.741	0	241.644	1130.01	391.259
sp|Q96GA3|LTV1_HUMAN Protein LTV1 homolog OS=Homo sapiens OX=9606 GN=LTV1 PE=1 SV=1	Q96GA3	427	Q96GA3_K427	85.355	SKNESK(0.067)EDK(0.933)RAR	2	1.7408	2478.6	0	1273.11	0	0	0	1824.96	0	0
sp|Q96GQ7|DDX27_HUMAN Probable ATP-dependent RNA helicase DDX27 OS=Homo sapiens OX=9606 GN=DDX27 PE=1 SV=2	Q96GQ7	666	Q96GQ7_K666	143.89	IAK(1)ALQEFDLALR	2	-0.48865	0	0	0	20227.9	17291.7	17500.2	23915.7	24971.8	7847.15
sp|Q96KR7|PHAR3_HUMAN Phosphatase and actin regulator 3 OS=Homo sapiens OX=9606 GN=PHACTR3 PE=1 SV=1	Q96KR7	440	Q96KR7_K440	47.472	RTDEERQEIRQQIEMK(0.5)LSK(0.5)R	3	2.1013	0	0	0	807.737	347.655	523.115	0	0	0
sp|Q96KR7|PHAR3_HUMAN Phosphatase and actin regulator 3 OS=Homo sapiens OX=9606 GN=PHACTR3 PE=1 SV=1	Q96KR7	443	Q96KR7_K443	47.472	RTDEERQEIRQQIEMK(0.5)LSK(0.5)R	3	2.1013	0	0	0	807.737	347.655	523.115	0	0	0
sp|Q96LQ0|PPR36_HUMAN Protein phosphatase 1 regulatory subunit 36 OS=Homo sapiens OX=9606 GN=PPP1R36 PE=1 SV=1	Q96LQ0	302	Q96LQ0_K302	48.659	MMAK(1)RPAIK(1)K(1)AINMR	3	3.6435	0	0	0	0	0	0	0	0	0
sp|Q96LQ0|PPR36_HUMAN Protein phosphatase 1 regulatory subunit 36 OS=Homo sapiens OX=9606 GN=PPP1R36 PE=1 SV=1	Q96LQ0	307	Q96LQ0_K307	48.659	MMAK(1)RPAIK(1)K(1)AINMR	3	3.6435	0	0	0	0	0	0	0	0	0
sp|Q96LQ0|PPR36_HUMAN Protein phosphatase 1 regulatory subunit 36 OS=Homo sapiens OX=9606 GN=PPP1R36 PE=1 SV=1	Q96LQ0	308	Q96LQ0_K308	48.659	MMAK(1)RPAIK(1)K(1)AINMR	3	3.6435	0	0	0	0	0	0	0	0	0
sp|Q96M86|DNHD1_HUMAN Dynein heavy chain domain-containing protein 1 OS=Homo sapiens OX=9606 GN=DNHD1 PE=1 SV=2	Q96M86	1892	Q96M86_K1892	86.189	TLNVTK(1)EEPK(0.001)CQK(0.999)PR	2	1.5588	10970.9	7991.68	15295.3	10896.1	12876.1	10749.7	3214.24	0	15242.5
sp|Q96M86|DNHD1_HUMAN Dynein heavy chain domain-containing protein 1 OS=Homo sapiens OX=9606 GN=DNHD1 PE=1 SV=2	Q96M86	1899	Q96M86_K1899	86.189	TLNVTK(1)EEPK(0.001)CQK(0.999)PR	2	1.5588	10970.9	7991.68	15295.3	10896.1	12876.1	10749.7	3214.24	0	15242.5
sp|Q96M98|PACRG_HUMAN Parkin coregulated gene protein OS=Homo sapiens OX=9606 GN=PACRG PE=1 SV=2	Q96M98	12	Q96M98_K12	41.348	MVAEK(0.014)ETLSLNK(0.974)CPDK(0.012)MPK	3	-2.8313	0	1040.94	0	1835.67	1148.47	1561.98	0	0	0
sp|Q96MR6|CFA57_HUMAN Cilia- and flagella-associated protein 57 OS=Homo sapiens OX=9606 GN=CFAP57 PE=1 SV=3	Q96MR6	1116	Q96MR6_K1116	89.698	NLATLK(1)K	2	-1.455	0	0	0	168.505	198.872	146.79	0	124.54	288.649
sp|Q96MT7|CFA44_HUMAN Cilia- and flagella-associated protein 44 OS=Homo sapiens OX=9606 GN=CFAP44 PE=1 SV=2	Q96MT7	1734	Q96MT7_K1734	81.784	K(1)ELANAK	1	0.60496	631.959	16971.1	0	0	21391.9	0	0	2795.79	23401.3
sp|Q96MT7|CFA44_HUMAN Cilia- and flagella-associated protein 44 OS=Homo sapiens OX=9606 GN=CFAP44 PE=1 SV=2	Q96MT7	1740	Q96MT7_K1740	60.301	LRK(1)ELANAK(0.603)EMK(0.397)MWEEK	2	1.3909	631.959	0	0	0	0	0	0	2795.79	0
sp|Q96NC0|ZMAT2_HUMAN Zinc finger matrin-type protein 2 OS=Homo sapiens OX=9606 GN=ZMAT2 PE=1 SV=1	Q96NC0	8	Q96NC0_K8	106.88	ASGSGTK(1)NLDFR	2	0.39278	0	0	0	10351.3	12770.2	15007.8	21975.9	22610.3	11560.4
sp|Q96NI8|ZN570_HUMAN Zinc finger protein 570 OS=Homo sapiens OX=9606 GN=ZNF570 PE=2 SV=1	Q96NI8	7	Q96NI8_K7	52.928	MAVGLLK(1)AMYQELVTFR	2	0.82483	0	0	0	0	0	0	0	0	0
sp|Q96PY6|NEK1_HUMAN Serine/threonine-protein kinase Nek1 OS=Homo sapiens OX=9606 GN=NEK1 PE=1 SV=2	Q96PY6	323	Q96PY6_K323	59.003	PAAKYGIPLAYK(0.082)K(0.886)YGDK(0.516)K(0.516)LHEK	3	2.6337	0	0	0	0	0	0	0	0	0
sp|Q96PY6|NEK1_HUMAN Serine/threonine-protein kinase Nek1 OS=Homo sapiens OX=9606 GN=NEK1 PE=1 SV=2	Q96PY6	327	Q96PY6_K327	59.003	PAAKYGIPLAYK(0.082)K(0.886)YGDK(0.516)K(0.516)LHEK	3	2.6337	0	0	0	0	0	0	0	0	0
sp|Q96PY6|NEK1_HUMAN Serine/threonine-protein kinase Nek1 OS=Homo sapiens OX=9606 GN=NEK1 PE=1 SV=2	Q96PY6	328	Q96PY6_K328	59.003	PAAKYGIPLAYK(0.082)K(0.886)YGDK(0.516)K(0.516)LHEK	3	2.6337	0	0	0	0	0	0	0	0	0
sp|Q96QC0|PP1RA_HUMAN Serine/threonine-protein phosphatase 1 regulatory subunit 10 OS=Homo sapiens OX=9606 GN=PPP1R10 PE=1 SV=1	Q96QC0	179	Q96QC0_K179	83.633	TTLPERPLTEVK(1)AETR	3	0.031558	0	0	0	14585	4820.24	4427.07	4282.9	19832.8	0
sp|Q96RL1|UIMC1_HUMAN BRCA1-A complex subunit RAP80 OS=Homo sapiens OX=9606 GN=UIMC1 PE=1 SV=2	Q96RL1	31	Q96RL1_K31	98.943	DVETTSSVSVK(1)R	2	-0.71161	0	0	0	0	0	0	0	6571.2	3423.51
sp|Q96SB4|SRPK1_HUMAN SRSF protein kinase 1 OS=Homo sapiens OX=9606 GN=SRPK1 PE=1 SV=2	Q96SB4	19	Q96SB4_K19	67.08	AK(0.117)K(0.878)DK(0.08)AQRK(0.925)SETQHR	2	0.15006	0	0	0	0	0	3880.81	0	0	4553.86
sp|Q96SB4|SRPK1_HUMAN SRSF protein kinase 1 OS=Homo sapiens OX=9606 GN=SRPK1 PE=1 SV=2	Q96SB4	25	Q96SB4_K25	67.08	AK(0.117)K(0.878)DK(0.08)AQRK(0.925)SETQHR	2	0.15006	0	0	0	0	0	3880.81	0	0	4553.86
sp|Q96ST2|IWS1_HUMAN Protein IWS1 homolog OS=Homo sapiens OX=9606 GN=IWS1 PE=1 SV=2	Q96ST2	760	Q96ST2_K760	58.32	VPMPSNK(1)DYVVRPK	3	0.10905	0	0	0	1919.36	0	0	0	6200.98	6098.77
sp|Q96T58|MINT_HUMAN Msx2-interacting protein OS=Homo sapiens OX=9606 GN=SPEN PE=1 SV=1	Q96T58	1598	Q96T58_K1598	58.268	EK(0.854)EK(0.049)DQK(0.049)PK(0.049)EVEKQEDTENHPK	2	-3.8793	0	0	0	0	0	0	0	0	0
sp|Q96T58|MINT_HUMAN Msx2-interacting protein OS=Homo sapiens OX=9606 GN=SPEN PE=1 SV=1	Q96T58	1881	Q96T58_K1881	97.08	TASK(1)NSAADLEHPEPSLPLSR	3	-0.037357	0	0	0	18390.3	14842	19018.2	9139.89	19955	16147.7
sp|Q99459|CDC5L_HUMAN Cell division cycle 5-like protein OS=Homo sapiens OX=9606 GN=CDC5L PE=1 SV=2	Q99459	200	Q99459_K200	87.298	AAGIEIQK(1)K(1)R	2	0.35231	0	0	0	9972.46	10967	9883.33	10289.1	19807.2	19233.1
sp|Q99459|CDC5L_HUMAN Cell division cycle 5-like protein OS=Homo sapiens OX=9606 GN=CDC5L PE=1 SV=2	Q99459	201	Q99459_K201	87.298	AAGIEIQK(1)K(1)R	2	0.35231	0	0	0	9972.46	10967	9883.33	10289.1	19807.2	19233.1
sp|Q99460|PSMD1_HUMAN 26S proteasome non-ATPase regulatory subunit 1 OS=Homo sapiens OX=9606 GN=PSMD1 PE=1 SV=2	Q99460	840	Q99460_K840	53.946	AK(0.964)K(0.523)K(0.523)EK(0.991)EK(0.999)EK(1)K	3	0.50289	0	0	0	5789.51	1368.21	424.519	0	5413.53	2840.48
sp|Q99460|PSMD1_HUMAN 26S proteasome non-ATPase regulatory subunit 1 OS=Homo sapiens OX=9606 GN=PSMD1 PE=1 SV=2	Q99460	841	Q99460_K841	53.946	AK(0.964)K(0.523)K(0.523)EK(0.991)EK(0.999)EK(1)K	3	0.50289	0	0	0	5789.51	1368.21	424.519	0	5413.53	2840.48
sp|Q99460|PSMD1_HUMAN 26S proteasome non-ATPase regulatory subunit 1 OS=Homo sapiens OX=9606 GN=PSMD1 PE=1 SV=2	Q99460	842	Q99460_K842	53.946	AK(0.964)K(0.523)K(0.523)EK(0.991)EK(0.999)EK(1)K	3	0.50289	0	0	0	5789.51	1368.21	424.519	0	5413.53	2840.48
sp|Q99460|PSMD1_HUMAN 26S proteasome non-ATPase regulatory subunit 1 OS=Homo sapiens OX=9606 GN=PSMD1 PE=1 SV=2	Q99460	844	Q99460_K844	53.946	AK(0.964)K(0.523)K(0.523)EK(0.991)EK(0.999)EK(1)K	3	0.50289	0	0	0	5789.51	1368.21	424.519	0	5413.53	2840.48
sp|Q99460|PSMD1_HUMAN 26S proteasome non-ATPase regulatory subunit 1 OS=Homo sapiens OX=9606 GN=PSMD1 PE=1 SV=2	Q99460	846	Q99460_K846	53.946	AK(0.964)K(0.523)K(0.523)EK(0.991)EK(0.999)EK(1)K	3	0.50289	0	0	0	5789.51	1368.21	424.519	0	5413.53	2840.48
sp|Q99460|PSMD1_HUMAN 26S proteasome non-ATPase regulatory subunit 1 OS=Homo sapiens OX=9606 GN=PSMD1 PE=1 SV=2	Q99460	848	Q99460_K848	53.946	AK(0.964)K(0.523)K(0.523)EK(0.991)EK(0.999)EK(1)K	3	0.50289	0	0	0	5789.51	1368.21	424.519	0	5413.53	2840.48
sp|Q99549|MPP8_HUMAN M-phase phosphoprotein 8 OS=Homo sapiens OX=9606 GN=MPHOSPH8 PE=1 SV=2	Q99549	214	Q99549_K214	83.106	EELKESK(0.856)K(0.325)PK(0.826)K(0.993)DEVK	2	-0.5551	0	0	0	0	0	0	0	0	0
sp|Q99549|MPP8_HUMAN M-phase phosphoprotein 8 OS=Homo sapiens OX=9606 GN=MPHOSPH8 PE=1 SV=2	Q99549	217	Q99549_K217	83.106	EELKESK(0.856)K(0.325)PK(0.826)K(0.993)DEVK	2	-0.5551	0	0	0	0	0	0	0	0	0
sp|Q99549|MPP8_HUMAN M-phase phosphoprotein 8 OS=Homo sapiens OX=9606 GN=MPHOSPH8 PE=1 SV=2	Q99549	218	Q99549_K218	83.106	EELKESK(0.856)K(0.325)PK(0.826)K(0.993)DEVK	2	-0.5551	0	0	0	0	0	0	0	0	0
sp|Q99575|POP1_HUMAN Ribonucleases P/MRP protein subunit POP1 OS=Homo sapiens OX=9606 GN=POP1 PE=1 SV=2	Q99575	5	Q99575_K5	67.997	MSNAK(0.837)ERK(0.054)HAK(0.054)K(0.054)MR	2	-1.2736	0	0	0	0	0	0	0	0	0
sp|Q99626|CDX2_HUMAN Homeobox protein CDX-2 OS=Homo sapiens OX=9606 GN=CDX2 PE=1 SV=3	Q99626	182	Q99626_K182	129.82	KPAQQSLGSQVK(1)TR	2	0.028115	0	0	0	5879.23	5107.51	2451.01	0	5941.15	6033.18
sp|Q99640|PMYT1_HUMAN Membrane-associated tyrosine- and threonine-specific cdc2-inhibitory kinase OS=Homo sapiens OX=9606 GN=PKMYT1 PE=1 SV=1	Q99640	154	Q99640_K154	80.165	K(1)LAEVGSHEK	2	0.13893	0	0	0	5716.9	6731.78	6478.96	17406.4	49589.4	0
sp|Q9BQ61|TRIR_HUMAN Telomerase RNA component interacting RNase OS=Homo sapiens OX=9606 GN=TRIR PE=1 SV=1	Q9BQ61	118	Q9BQ61_K118	105.65	GGPGSTLSFVGK(1)R	2	1.0216	0	0	0	16497.2	38151.5	25555.8	22133.1	35478.2	23543.7
sp|Q9BQ69|MACD1_HUMAN ADP-ribose glycohydrolase MACROD1 OS=Homo sapiens OX=9606 GN=MACROD1 PE=1 SV=2	Q9BQ69	129	Q9BQ69_K129	42.908	IPTWK(0.941)EMAK(0.836)GVAVK(0.227)VEEPRYK(0.997)K(1)DK	3	-1.1762	0	0	0	0	0	0	0	0	0
sp|Q9BQ69|MACD1_HUMAN ADP-ribose glycohydrolase MACROD1 OS=Homo sapiens OX=9606 GN=MACROD1 PE=1 SV=2	Q9BQ69	133	Q9BQ69_K133	42.908	IPTWK(0.941)EMAK(0.836)GVAVK(0.227)VEEPRYK(0.997)K(1)DK	3	-1.1762	0	0	0	0	0	0	0	0	0
sp|Q9BQ69|MACD1_HUMAN ADP-ribose glycohydrolase MACROD1 OS=Homo sapiens OX=9606 GN=MACROD1 PE=1 SV=2	Q9BQ69	145	Q9BQ69_K145	42.908	IPTWK(0.941)EMAK(0.836)GVAVK(0.227)VEEPRYK(0.997)K(1)DK	3	-1.1762	0	0	0	0	0	0	0	0	0
sp|Q9BQ69|MACD1_HUMAN ADP-ribose glycohydrolase MACROD1 OS=Homo sapiens OX=9606 GN=MACROD1 PE=1 SV=2	Q9BQ69	146	Q9BQ69_K146	42.908	IPTWK(0.941)EMAK(0.836)GVAVK(0.227)VEEPRYK(0.997)K(1)DK	3	-1.1762	0	0	0	0	0	0	0	0	0
sp|Q9BRU9|UTP23_HUMAN rRNA-processing protein UTP23 homolog OS=Homo sapiens OX=9606 GN=UTP23 PE=1 SV=2	Q9BRU9	238	Q9BRU9_K238	103.46	SNPK(1)VLSEK	1	0.25925	0	0	0	3166.75	3403.65	2448.73	0	0	5891.81
sp|Q9BSC4|NOL10_HUMAN Nucleolar protein 10 OS=Homo sapiens OX=9606 GN=NOL10 PE=1 SV=1	Q9BSC4	654	Q9BSC4_K654	99.53	SEQQK(1)K(1)QQEAEK	2	0.9164	0	0	0	3509.08	731.064	0	0	12359.6	0
sp|Q9BSC4|NOL10_HUMAN Nucleolar protein 10 OS=Homo sapiens OX=9606 GN=NOL10 PE=1 SV=1	Q9BSC4	655	Q9BSC4_K655	99.53	SEQQK(1)K(1)QQEAEK	2	0.9164	0	0	0	3509.08	731.064	0	0	12359.6	0
sp|Q9BSK1|ZN577_HUMAN Zinc finger protein 577 OS=Homo sapiens OX=9606 GN=ZNF577 PE=2 SV=3	Q9BSK1	131	Q9BSK1_K131	50.484	TLTGVK(1)YHRCVK	1	-4.0333	0	0	0	784.887	0	0	0	0	0
sp|Q9BT09|CNPY3_HUMAN Protein canopy homolog 3 OS=Homo sapiens OX=9606 GN=CNPY3 PE=1 SV=1	Q9BT09	83	Q9BT09_K83	96.773	EVIGTGYGILDQK(1)ASGVK	3	-0.039539	4259.1	3107.98	5681.06	0	0	0	0	5229.68	0
sp|Q9BT40|INP5K_HUMAN Inositol polyphosphate 5-phosphatase K OS=Homo sapiens OX=9606 GN=INPP5K PE=1 SV=3	Q9BT40	10	Q9BT40_K10	76.221	SSRKLSGPK(1)GR	2	0.31232	0	0	2327.02	0	1730.14	0	0	0	0
sp|Q9BTC0|DIDO1_HUMAN Death-inducer obliterator 1 OS=Homo sapiens OX=9606 GN=DIDO1 PE=1 SV=5	Q9BTC0	438	Q9BTC0_K438	43.557	PK(0.666)PK(0.666)EK(0.666)MK(0.935)MK(0.084)PEK(0.982)PSLPK	3	0.59895	0	0	0	0	0	5168.27	0	0	0
sp|Q9BTC0|DIDO1_HUMAN Death-inducer obliterator 1 OS=Homo sapiens OX=9606 GN=DIDO1 PE=1 SV=5	Q9BTC0	440	Q9BTC0_K440	43.557	PK(0.666)PK(0.666)EK(0.666)MK(0.935)MK(0.084)PEK(0.982)PSLPK	3	0.59895	0	0	0	0	0	5168.27	0	0	0
sp|Q9BTC0|DIDO1_HUMAN Death-inducer obliterator 1 OS=Homo sapiens OX=9606 GN=DIDO1 PE=1 SV=5	Q9BTC0	442	Q9BTC0_K442	43.557	PK(0.666)PK(0.666)EK(0.666)MK(0.935)MK(0.084)PEK(0.982)PSLPK	3	0.59895	0	0	0	0	0	5168.27	0	0	0
sp|Q9BTC0|DIDO1_HUMAN Death-inducer obliterator 1 OS=Homo sapiens OX=9606 GN=DIDO1 PE=1 SV=5	Q9BTC0	444	Q9BTC0_K444	43.557	PK(0.666)PK(0.666)EK(0.666)MK(0.935)MK(0.084)PEK(0.982)PSLPK	3	0.59895	0	0	0	0	0	5168.27	0	0	0
sp|Q9BTC0|DIDO1_HUMAN Death-inducer obliterator 1 OS=Homo sapiens OX=9606 GN=DIDO1 PE=1 SV=5	Q9BTC0	449	Q9BTC0_K449	43.557	PK(0.666)PK(0.666)EK(0.666)MK(0.935)MK(0.084)PEK(0.982)PSLPK	3	0.59895	0	0	0	0	0	5168.27	0	0	0
sp|Q9BTE7|DCNL5_HUMAN DCN1-like protein 5 OS=Homo sapiens OX=9606 GN=DCUN1D5 PE=1 SV=1	Q9BTE7	23	Q9BTE7_K23	107.34	SPGVAAAVAEDGGLK(1)K	2	-0.11961	0	0	0	0	7558.67	8798.07	3946.51	7558.45	7223.07
sp|Q9BUJ2|HNRL1_HUMAN Heterogeneous nuclear ribonucleoprotein U-like protein 1 OS=Homo sapiens OX=9606 GN=HNRNPUL1 PE=1 SV=2	Q9BUJ2	449	Q9BUJ2_K449	52.522	K(1)YNILGTNAIMDK(1)MR	2	-1.3894	0	937.277	1417.69	0	1465.26	0	0	0	9266.92
sp|Q9BUJ2|HNRL1_HUMAN Heterogeneous nuclear ribonucleoprotein U-like protein 1 OS=Homo sapiens OX=9606 GN=HNRNPUL1 PE=1 SV=2	Q9BUJ2	461	Q9BUJ2_K461	52.522	K(1)YNILGTNAIMDK(1)MR	2	-1.3894	0	937.277	1417.69	0	1465.26	0	0	0	9266.92
sp|Q9BVI0|PHF20_HUMAN PHD finger protein 20 OS=Homo sapiens OX=9606 GN=PHF20 PE=1 SV=2	Q9BVI0	177	Q9BVI0_K177	45.992	ATVNVK(0.783)K(0.228)DK(0.989)EDK(1)PLK	4	0.7282	0	0	0	4214.25	0	0	0	0	0
sp|Q9BVI0|PHF20_HUMAN PHD finger protein 20 OS=Homo sapiens OX=9606 GN=PHF20 PE=1 SV=2	Q9BVI0	180	Q9BVI0_K180	45.992	ATVNVK(0.783)K(0.228)DK(0.989)EDK(1)PLK	4	0.7282	0	0	0	4214.25	0	0	0	0	0
sp|Q9BVI0|PHF20_HUMAN PHD finger protein 20 OS=Homo sapiens OX=9606 GN=PHF20 PE=1 SV=2	Q9BVI0	183	Q9BVI0_K183	45.992	ATVNVK(0.783)K(0.228)DK(0.989)EDK(1)PLK	4	0.7282	0	0	0	4214.25	0	0	0	0	0
sp|Q9BVP2|GNL3_HUMAN Guanine nucleotide-binding protein-like 3 OS=Homo sapiens OX=9606 GN=GNL3 PE=1 SV=2	Q9BVP2	332	Q9BVP2_K332	63.536	SPASIEVVK(1)PMEAASAILSQADAR	3	-0.2618	34066	26699.6	39010.4	66412	44181.3	64584.7	71668.3	81129.4	42555.1
sp|Q9BWV7|TTLL2_HUMAN Probable tubulin polyglutamylase TTLL2 OS=Homo sapiens OX=9606 GN=TTLL2 PE=2 SV=3	Q9BWV7	343	Q9BWV7_K343	66.568	SWDVDDLLLWK(1)K	2	3.3953	0	0	0	1960.44	0	0	0	0	1356.61
sp|Q9BXX2|AN30B_HUMAN Ankyrin repeat domain-containing protein 30B OS=Homo sapiens OX=9606 GN=ANKRD30B PE=2 SV=3	Q9BXX2	53	Q9BXX2_K53	41.257	GQVQK(0.938)LEK(0.042)MTVGK(0.01)K(0.01)PVNLNKRDMK	2	1.1437	0	0	0	0	0	0	0	0	0
sp|Q9BY42|RTF2_HUMAN Replication termination factor 2 OS=Homo sapiens OX=9606 GN=RTF2 PE=1 SV=3	Q9BY42	289	Q9BY42_K289	67.997	SLFTTHSSAK(1)R	3	-0.41409	0	0	0	0	5021.83	3340.23	1745.46	0	0
sp|Q9BZE3|BARH1_HUMAN BarH-like 1 homeobox protein OS=Homo sapiens OX=9606 GN=BARHL1 PE=2 SV=1	Q9BZE3	143	Q9BZE3_K143	70.167	LDK(1)SGSNASSDSEYKVK	2	-4.4321	0	0	0	0	0	0	0	0	0
sp|Q9BZE4|GTPB4_HUMAN GTP-binding protein 4 OS=Homo sapiens OX=9606 GN=GTPBP4 PE=1 SV=3	Q9BZE4	7	Q9BZE4_K7	62.659	AHYNFK(1)K	2	-0.31694	0	0	0	0	0	0	0	0	0
sp|Q9BZE4|GTPB4_HUMAN GTP-binding protein 4 OS=Homo sapiens OX=9606 GN=GTPBP4 PE=1 SV=3	Q9BZE4	584	Q9BZE4_K584	70.908	DVK(1)MVK(1)K	1	-0.31626	0	0	0	0	0	0	0	10390.1	13229.2
sp|Q9BZE4|GTPB4_HUMAN GTP-binding protein 4 OS=Homo sapiens OX=9606 GN=GTPBP4 PE=1 SV=3	Q9BZE4	587	Q9BZE4_K587	70.908	DVK(1)MVK(1)K	1	-0.31626	0	0	0	0	0	0	0	10390.1	13229.2
sp|Q9BZE4|GTPB4_HUMAN GTP-binding protein 4 OS=Homo sapiens OX=9606 GN=GTPBP4 PE=1 SV=3	Q9BZE4	598	Q9BZE4_K598	80.219	NAQK(1)K(1)MNR	2	0.0020654	0	0	0	0	0	0	0	0	0
sp|Q9BZE4|GTPB4_HUMAN GTP-binding protein 4 OS=Homo sapiens OX=9606 GN=GTPBP4 PE=1 SV=3	Q9BZE4	599	Q9BZE4_K599	80.219	NAQK(1)K(1)MNR	2	0.0020654	0	0	0	0	0	0	0	0	0
sp|Q9BZE4|GTPB4_HUMAN GTP-binding protein 4 OS=Homo sapiens OX=9606 GN=GTPBP4 PE=1 SV=3	Q9BZE4	534	Q9BZE4_K534	75.548	SLGVDMDDK(1)DDAHYAVQAR	3	0.11683	4676.87	2061.89	5547.16	33632	14163.4	0	5274.33	27961.7	0
sp|Q9BZG1|RAB34_HUMAN Ras-related protein Rab-34 OS=Homo sapiens OX=9606 GN=RAB34 PE=1 SV=1	Q9BZG1	79	Q9BZG1_K79	51.487	FCK(0.052)DTFDK(0.939)NYK(0.009)ATIGVDFEMER	3	1.16	5648.69	5789.77	12727.9	13460.2	17854.3	8968.08	8442.95	7781.76	3228.97
sp|Q9BZI7|REN3B_HUMAN Regulator of nonsense transcripts 3B OS=Homo sapiens OX=9606 GN=UPF3B PE=1 SV=1	Q9BZI7	422	Q9BZI7_K422	76.357	TEK(0.009)K(0.991)EEVVK(1)R	3	0.1901	0	0	0	5127.91	3432.7	2529.73	1798.43	0	0
sp|Q9BZI7|REN3B_HUMAN Regulator of nonsense transcripts 3B OS=Homo sapiens OX=9606 GN=UPF3B PE=1 SV=1	Q9BZI7	427	Q9BZI7_K427	76.357	TEK(0.009)K(0.991)EEVVK(1)R	3	0.1901	0	0	0	5127.91	3432.7	2529.73	1798.43	0	0
sp|Q9BZZ5|API5_HUMAN Apoptosis inhibitor 5 OS=Homo sapiens OX=9606 GN=API5 PE=1 SV=3	Q9BZZ5	467	Q9BZZ5_K467	91.743	ASEDTTSGSPPK(1)K(1)SSAGPK(1)R	2	0.27844	0	0	0	7999.59	12142	9303.44	7952.2	20348.7	20401.9
sp|Q9BZZ5|API5_HUMAN Apoptosis inhibitor 5 OS=Homo sapiens OX=9606 GN=API5 PE=1 SV=3	Q9BZZ5	468	Q9BZZ5_K468	91.743	ASEDTTSGSPPK(1)K(1)SSAGPK(1)R	2	0.27844	0	0	0	7999.59	12142	9303.44	7952.2	20348.7	20401.9
sp|Q9BZZ5|API5_HUMAN Apoptosis inhibitor 5 OS=Homo sapiens OX=9606 GN=API5 PE=1 SV=3	Q9BZZ5	474	Q9BZZ5_K474	91.743	ASEDTTSGSPPK(1)K(1)SSAGPK(1)R	2	0.27844	0	0	0	7999.59	12142	9303.44	7952.2	20348.7	20401.9
sp|Q9C0A1|ZFHX2_HUMAN Zinc finger homeobox protein 2 OS=Homo sapiens OX=9606 GN=ZFHX2 PE=1 SV=3	Q9C0A1	2119	Q9C0A1_K2119	114.02	AK(1)EK(0.5)K(0.5)AK	2	1.2345	6170.36	0	9845.98	787.856	0	0	550.066	10829.6	11114.6
sp|Q9C0A1|ZFHX2_HUMAN Zinc finger homeobox protein 2 OS=Homo sapiens OX=9606 GN=ZFHX2 PE=1 SV=3	Q9C0A1	2121	Q9C0A1_K2121	114.02	AK(1)EK(0.5)K(0.5)AK	2	1.2345	6170.36	0	9845.98	787.856	0	0	550.066	10829.6	11114.6
sp|Q9C0A1|ZFHX2_HUMAN Zinc finger homeobox protein 2 OS=Homo sapiens OX=9606 GN=ZFHX2 PE=1 SV=3	Q9C0A1	2122	Q9C0A1_K2122	114.02	AK(1)EK(0.5)K(0.5)AK	2	1.2345	6170.36	0	9845.98	787.856	0	0	550.066	10829.6	11114.6
sp|Q9C0D4|Z518B_HUMAN Zinc finger protein 518B OS=Homo sapiens OX=9606 GN=ZNF518B PE=1 SV=2	Q9C0D4	1010	Q9C0D4_K1010	73.248	RQMMLK(0.985)MK(0.149)LK(0.865)K	2	-1.2497	0	0	0	3582.66	1392.79	523.115	0	1054.29	0
sp|Q9C0D4|Z518B_HUMAN Zinc finger protein 518B OS=Homo sapiens OX=9606 GN=ZNF518B PE=1 SV=2	Q9C0D4	1014	Q9C0D4_K1014	73.248	RQMMLK(0.985)MK(0.149)LK(0.865)K	2	-1.2497	0	0	0	3582.66	1392.79	523.115	0	1054.29	0
sp|Q9GZS3|SKI8_HUMAN Superkiller complex protein 8 OS=Homo sapiens OX=9606 GN=SKIC8 PE=1 SV=1	Q9GZS3	45	Q9GZS3_K45	75.911	KENSETVVTGSLDDLVK(0.991)VWK(0.009)WR	2	-1.217	0	0	0	0	0	172.044	0	307766	0
sp|Q9GZU0|CF062_HUMAN Uncharacterized protein C6orf62 OS=Homo sapiens OX=9606 GN=C6orf62 PE=2 SV=1	Q9GZU0	8	Q9GZU0_K8	46.406	MGDPNSRK(1)K	2	-0.7648	0	0	0	0	0	11644.4	0	0	0
sp|Q9H0A0|NAT10_HUMAN RNA cytidine acetyltransferase OS=Homo sapiens OX=9606 GN=NAT10 PE=1 SV=2	Q9H0A0	989	Q9H0A0_K989	178.68	AGPNASIISLK(1)SDK	2	-0.30475	0	0	0	61183.8	85832	60574.4	51254.8	114197	74169.8
sp|Q9H0A0|NAT10_HUMAN RNA cytidine acetyltransferase OS=Homo sapiens OX=9606 GN=NAT10 PE=1 SV=2	Q9H0A0	1016	Q9H0A0_K1016	57.802	NK(1)K(1)DMK(1)LK(1)R	2	-0.19293	0	0	0	15364	13697.5	13688.3	0	16176.8	0
sp|Q9H0A0|NAT10_HUMAN RNA cytidine acetyltransferase OS=Homo sapiens OX=9606 GN=NAT10 PE=1 SV=2	Q9H0A0	1017	Q9H0A0_K1017	57.802	NK(1)K(1)DMK(1)LK(1)R	2	-0.19293	0	0	0	15364	13697.5	13688.3	0	16176.8	0
sp|Q9H0A0|NAT10_HUMAN RNA cytidine acetyltransferase OS=Homo sapiens OX=9606 GN=NAT10 PE=1 SV=2	Q9H0A0	1020	Q9H0A0_K1020	57.802	NK(1)K(1)DMK(1)LK(1)R	2	-0.19293	0	0	0	15364	13697.5	13688.3	0	16176.8	0
sp|Q9H0A0|NAT10_HUMAN RNA cytidine acetyltransferase OS=Homo sapiens OX=9606 GN=NAT10 PE=1 SV=2	Q9H0A0	1022	Q9H0A0_K1022	57.802	NK(1)K(1)DMK(1)LK(1)R	2	-0.19293	0	0	0	15364	13697.5	13688.3	0	16176.8	0
sp|Q9H0C2|ADT4_HUMAN ADP/ATP translocase 4 OS=Homo sapiens OX=9606 GN=SLC25A31 PE=1 SV=1	Q9H0C2	9	Q9H0C2_K9	60.102	MHREPAK(0.098)K(0.18)K(0.722)AEK	2	4.2661	0	0	0	0	0	0	0	0	0
sp|Q9H0S4|DDX47_HUMAN Probable ATP-dependent RNA helicase DDX47 OS=Homo sapiens OX=9606 GN=DDX47 PE=1 SV=1	Q9H0S4	443	Q9H0S4_K443	45.357	NK(1)VAGGK(1)MK(1)K(1)R	2	0.28836	0	0	0	13135.2	13971.9	6017.38	0	35027	31355.1
sp|Q9H0S4|DDX47_HUMAN Probable ATP-dependent RNA helicase DDX47 OS=Homo sapiens OX=9606 GN=DDX47 PE=1 SV=1	Q9H0S4	448	Q9H0S4_K448	45.357	NK(1)VAGGK(1)MK(1)K(1)R	2	0.28836	0	0	0	13135.2	13971.9	6017.38	0	35027	31355.1
sp|Q9H0S4|DDX47_HUMAN Probable ATP-dependent RNA helicase DDX47 OS=Homo sapiens OX=9606 GN=DDX47 PE=1 SV=1	Q9H0S4	450	Q9H0S4_K450	45.357	NK(1)VAGGK(1)MK(1)K(1)R	2	0.28836	0	0	0	13135.2	13971.9	6017.38	0	35027	31355.1
sp|Q9H0S4|DDX47_HUMAN Probable ATP-dependent RNA helicase DDX47 OS=Homo sapiens OX=9606 GN=DDX47 PE=1 SV=1	Q9H0S4	451	Q9H0S4_K451	45.357	NK(1)VAGGK(1)MK(1)K(1)R	2	0.28836	0	0	0	13135.2	13971.9	6017.38	0	35027	31355.1
sp|Q9H1E3|NUCKS_HUMAN Nuclear ubiquitous casein and cyclin-dependent kinase substrate 1 OS=Homo sapiens OX=9606 GN=NUCKS1 PE=1 SV=1	Q9H1E3	35	Q9H1E3_K35	118.03	DSGPPTK(1)K	2	1.2656	166.51	127.387	0	6997.82	11484.7	5271.2	0	0	7881.53
sp|Q9H1E3|NUCKS_HUMAN Nuclear ubiquitous casein and cyclin-dependent kinase substrate 1 OS=Homo sapiens OX=9606 GN=NUCKS1 PE=1 SV=1	Q9H1E3	188	Q9H1E3_K188	81.017	GK(1)VGRPTASK(1)ASK	2	-0.5358	0	0	0	1495.9	0	0	0	4214.3	4861.44
sp|Q9H1E3|NUCKS_HUMAN Nuclear ubiquitous casein and cyclin-dependent kinase substrate 1 OS=Homo sapiens OX=9606 GN=NUCKS1 PE=1 SV=1	Q9H1E3	196	Q9H1E3_K196	126.34	VGRPTASK(1)ASK	2	-0.83742	0	0	0	1495.9	0	0	21311.8	4214.3	4861.44
sp|Q9H1E3|NUCKS_HUMAN Nuclear ubiquitous casein and cyclin-dependent kinase substrate 1 OS=Homo sapiens OX=9606 GN=NUCKS1 PE=1 SV=1	Q9H1E3	154	Q9H1E3_K154	81.525	NK(1)K(1)MVK(1)K	1	-0.87286	0	0	0	15276.3	4629.45	13275.1	0	18293.2	16567.4
sp|Q9H1E3|NUCKS_HUMAN Nuclear ubiquitous casein and cyclin-dependent kinase substrate 1 OS=Homo sapiens OX=9606 GN=NUCKS1 PE=1 SV=1	Q9H1E3	155	Q9H1E3_K155	81.525	NK(1)K(1)MVK(1)K	1	-0.87286	0	0	0	15276.3	4629.45	13275.1	0	18293.2	16567.4
sp|Q9H1E3|NUCKS_HUMAN Nuclear ubiquitous casein and cyclin-dependent kinase substrate 1 OS=Homo sapiens OX=9606 GN=NUCKS1 PE=1 SV=1	Q9H1E3	158	Q9H1E3_K158	81.525	NK(1)K(1)MVK(1)K	1	-0.87286	0	0	0	15276.3	4629.45	13275.1	0	18293.2	16567.4
sp|Q9H1K0|RBNS5_HUMAN Rabenosyn-5 OS=Homo sapiens OX=9606 GN=RBSN PE=1 SV=2	Q9H1K0	49	Q9H1K0_K49	75.669	DVK(0.029)GQIK(0.971)SLVQK(0.997)AK(0.003)K	3	-0.20453	0	0	0	2603.29	0	0	0	0	0
sp|Q9H1K0|RBNS5_HUMAN Rabenosyn-5 OS=Homo sapiens OX=9606 GN=RBSN PE=1 SV=2	Q9H1K0	54	Q9H1K0_K54	75.669	DVK(0.029)GQIK(0.971)SLVQK(0.997)AK(0.003)K	3	-0.20453	0	0	0	2603.29	0	0	0	0	0
sp|Q9H2G2|SLK_HUMAN STE20-like serine/threonine-protein kinase OS=Homo sapiens OX=9606 GN=SLK PE=1 SV=1	Q9H2G2	908	Q9H2G2_K908	59.345	IK(0.991)GEQEK(0.072)ELSK(0.937)FQNMLK	3	-1.7853	3093.35	0	2665.71	0	0	0	0	0	0
sp|Q9H2G2|SLK_HUMAN STE20-like serine/threonine-protein kinase OS=Homo sapiens OX=9606 GN=SLK PE=1 SV=1	Q9H2G2	917	Q9H2G2_K917	59.345	IK(0.991)GEQEK(0.072)ELSK(0.937)FQNMLK	3	-1.7853	3093.35	0	2665.71	0	0	0	0	0	0
sp|Q9H2K8|TAOK3_HUMAN Serine/threonine-protein kinase TAO3 OS=Homo sapiens OX=9606 GN=TAOK3 PE=1 SV=2	Q9H2K8	700	Q9H2K8_K700	41.615	K(1)HVMELRQQPK(0.999)NLK(0.216)AMEMQIK(0.785)K	3	0.32941	80535.7	114652	36803.7	67154.3	32886	64128.2	0	53770.1	0
sp|Q9H2K8|TAOK3_HUMAN Serine/threonine-protein kinase TAO3 OS=Homo sapiens OX=9606 GN=TAOK3 PE=1 SV=2	Q9H2K8	710	Q9H2K8_K710	41.615	K(1)HVMELRQQPK(0.999)NLK(0.216)AMEMQIK(0.785)K	3	0.32941	80535.7	114652	36803.7	67154.3	32886	64128.2	0	53770.1	0
sp|Q9H2K8|TAOK3_HUMAN Serine/threonine-protein kinase TAO3 OS=Homo sapiens OX=9606 GN=TAOK3 PE=1 SV=2	Q9H2K8	720	Q9H2K8_K720	41.615	K(1)HVMELRQQPK(0.999)NLK(0.216)AMEMQIK(0.785)K	3	0.32941	80535.7	114652	36803.7	67154.3	32886	64128.2	0	53770.1	0
sp|Q9H2S6|TNMD_HUMAN Tenomodulin OS=Homo sapiens OX=9606 GN=TNMD PE=1 SV=1	Q9H2S6	74	Q9H2S6_K74	69.721	KAYDMEHTFYSNGEK(0.939)K(0.061)K	2	-3.0455	0	0	0	0	0	0	0	0	0
sp|Q9H307|PININ_HUMAN Pinin OS=Homo sapiens OX=9606 GN=PNN PE=1 SV=5	Q9H307	553	Q9H307_K553	130.27	LTEVPVEPVLTVHPESK(1)SK(1)TK(1)TR	3	0.46447	14283.1	13597.7	11989.1	156700	126237	97431.3	68568.9	215580	153415
sp|Q9H307|PININ_HUMAN Pinin OS=Homo sapiens OX=9606 GN=PNN PE=1 SV=5	Q9H307	555	Q9H307_K555	123.29	LTEVPVEPVLTVHPESK(1)SK(1)TK(1)TR	3	0.46447	0	0	0	58204.9	45286.5	49637.9	26715.3	82300.6	66082.2
sp|Q9H307|PININ_HUMAN Pinin OS=Homo sapiens OX=9606 GN=PNN PE=1 SV=5	Q9H307	557	Q9H307_K557	99.881	LTEVPVEPVLTVHPESK(1)SK(1)TK(1)TR	3	0.46447	0	0	0	28302.4	21661.6	19371.2	20659.1	47918.8	39756.3
sp|Q9H446|RWDD1_HUMAN RWD domain-containing protein 1 OS=Homo sapiens OX=9606 GN=RWDD1 PE=1 SV=1	Q9H446	167	Q9H446_K167	48.376	K(1)K(1)RMK(1)EEEQAGK(0.809)NK(0.192)LSGK	2	-2.8894	0	0	0	0	0	0	0	0	0
sp|Q9H446|RWDD1_HUMAN RWD domain-containing protein 1 OS=Homo sapiens OX=9606 GN=RWDD1 PE=1 SV=1	Q9H446	168	Q9H446_K168	48.376	K(1)K(1)RMK(1)EEEQAGK(0.809)NK(0.192)LSGK	2	-2.8894	0	0	0	0	0	0	0	0	0
sp|Q9H446|RWDD1_HUMAN RWD domain-containing protein 1 OS=Homo sapiens OX=9606 GN=RWDD1 PE=1 SV=1	Q9H446	171	Q9H446_K171	48.376	K(1)K(1)RMK(1)EEEQAGK(0.809)NK(0.192)LSGK	2	-2.8894	0	0	0	0	0	0	0	0	0
sp|Q9H446|RWDD1_HUMAN RWD domain-containing protein 1 OS=Homo sapiens OX=9606 GN=RWDD1 PE=1 SV=1	Q9H446	178	Q9H446_K178	48.376	K(1)K(1)RMK(1)EEEQAGK(0.809)NK(0.192)LSGK	2	-2.8894	0	0	0	0	0	0	0	0	0
sp|Q9H501|ESF1_HUMAN ESF1 homolog OS=Homo sapiens OX=9606 GN=ESF1 PE=1 SV=1	Q9H501	833	Q9H501_K833	65.477	KSIDPALSMLIK(1)SIK	3	-0.28392	0	0	0	0	3292.42	0	0	5830.34	0
sp|Q9H7B2|RPF2_HUMAN Ribosome production factor 2 homolog OS=Homo sapiens OX=9606 GN=RPF2 PE=1 SV=2	Q9H7B2	241	Q9H7B2_K241	40.496	LSMK(0.995)MPK(0.986)ALK(0.63)PK(0.63)K(0.919)K(0.839)K	2	-1.9702	0	0	3003.32	0	4049.15	0	3136.58	0	0
sp|Q9H7B2|RPF2_HUMAN Ribosome production factor 2 homolog OS=Homo sapiens OX=9606 GN=RPF2 PE=1 SV=2	Q9H7B2	244	Q9H7B2_K244	40.496	LSMK(0.995)MPK(0.986)ALK(0.63)PK(0.63)K(0.919)K(0.839)K	2	-1.9702	0	0	3003.32	0	4049.15	0	3136.58	0	0
sp|Q9H7B2|RPF2_HUMAN Ribosome production factor 2 homolog OS=Homo sapiens OX=9606 GN=RPF2 PE=1 SV=2	Q9H7B2	247	Q9H7B2_K247	40.496	LSMK(0.995)MPK(0.986)ALK(0.63)PK(0.63)K(0.919)K(0.839)K	2	-1.9702	0	0	3003.32	0	4049.15	0	3136.58	0	0
sp|Q9H7B2|RPF2_HUMAN Ribosome production factor 2 homolog OS=Homo sapiens OX=9606 GN=RPF2 PE=1 SV=2	Q9H7B2	249	Q9H7B2_K249	40.496	LSMK(0.995)MPK(0.986)ALK(0.63)PK(0.63)K(0.919)K(0.839)K	2	-1.9702	0	0	3003.32	0	4049.15	0	3136.58	0	0
sp|Q9H7B2|RPF2_HUMAN Ribosome production factor 2 homolog OS=Homo sapiens OX=9606 GN=RPF2 PE=1 SV=2	Q9H7B2	250	Q9H7B2_K250	40.496	LSMK(0.995)MPK(0.986)ALK(0.63)PK(0.63)K(0.919)K(0.839)K	2	-1.9702	0	0	3003.32	0	4049.15	0	3136.58	0	0
sp|Q9H7B2|RPF2_HUMAN Ribosome production factor 2 homolog OS=Homo sapiens OX=9606 GN=RPF2 PE=1 SV=2	Q9H7B2	251	Q9H7B2_K251	40.496	LSMK(0.995)MPK(0.986)ALK(0.63)PK(0.63)K(0.919)K(0.839)K	2	-1.9702	0	0	3003.32	0	4049.15	0	3136.58	0	0
sp|Q9H7N4|SFR19_HUMAN Splicing factor, arginine/serine-rich 19 OS=Homo sapiens OX=9606 GN=SCAF1 PE=1 SV=3	Q9H7N4	898	Q9H7N4_K898	117.71	AAPGSTK(0.023)PK(0.977)K(1)TK	2	0.4766	0	0	0	5822.75	5409.54	2830.02	0	3852.14	0
sp|Q9H7N4|SFR19_HUMAN Splicing factor, arginine/serine-rich 19 OS=Homo sapiens OX=9606 GN=SCAF1 PE=1 SV=3	Q9H7N4	899	Q9H7N4_K899	117.71	AAPGSTK(0.023)PK(0.977)K(1)TK	2	0.4766	0	0	0	5822.75	5409.54	2830.02	0	3852.14	0
sp|Q9H7N4|SFR19_HUMAN Splicing factor, arginine/serine-rich 19 OS=Homo sapiens OX=9606 GN=SCAF1 PE=1 SV=3	Q9H7N4	865	Q9H7N4_K865	73.624	DAASAGLGSIGVK(1)FSR	2	-0.8919	0	0	0	0	2312.71	2812.27	3116.88	7917.34	5034.65
sp|Q9H8G2|CAAP1_HUMAN Caspase activity and apoptosis inhibitor 1 OS=Homo sapiens OX=9606 GN=CAAP1 PE=1 SV=2	Q9H8G2	4	Q9H8G2_K4	51.436	MTGK(1)K(1)SSR	2	0.44867	0	479.624	681.406	0	0	0	0	0	0
sp|Q9H8G2|CAAP1_HUMAN Caspase activity and apoptosis inhibitor 1 OS=Homo sapiens OX=9606 GN=CAAP1 PE=1 SV=2	Q9H8G2	5	Q9H8G2_K5	51.436	MTGK(1)K(1)SSR	2	0.44867	0	479.624	681.406	0	0	0	0	0	0
sp|Q9HAF1|EAF6_HUMAN Chromatin modification-related protein MEAF6 OS=Homo sapiens OX=9606 GN=MEAF6 PE=1 SV=1	Q9HAF1	169	Q9HAF1_K169	147.26	AASSTSSGSHHSSHK(1)K(1)R	2	-0.58103	0	0	160.616	4603.79	1765.81	1273.9	1383.46	1488.44	1909.62
sp|Q9HAF1|EAF6_HUMAN Chromatin modification-related protein MEAF6 OS=Homo sapiens OX=9606 GN=MEAF6 PE=1 SV=1	Q9HAF1	170	Q9HAF1_K170	147.26	AASSTSSGSHHSSHK(1)K(1)R	2	-0.58103	0	0	85.1873	4603.79	1765.81	1273.9	1383.46	1385.22	1833.61
sp|Q9HAF1|EAF6_HUMAN Chromatin modification-related protein MEAF6 OS=Homo sapiens OX=9606 GN=MEAF6 PE=1 SV=1	Q9HAF1	182	Q9HAF1_K182	96.64	IDLK(1)LNK(0.896)K(0.104)PR	3	-0.0046723	0	0	0	46476.8	29236.4	20014.5	16190.3	32999.1	20437
sp|Q9HAF1|EAF6_HUMAN Chromatin modification-related protein MEAF6 OS=Homo sapiens OX=9606 GN=MEAF6 PE=1 SV=1	Q9HAF1	185	Q9HAF1_K185	96.64	IDLK(1)LNK(0.923)K(0.077)PR	3	0.40544	0	0	0	46476.8	29236.4	20014.5	16190.3	32999.1	20437
sp|Q9HAU5|RENT2_HUMAN Regulator of nonsense transcripts 2 OS=Homo sapiens OX=9606 GN=UPF2 PE=1 SV=1	Q9HAU5	6	Q9HAU5_K6	57.047	MPAERK(1)K	2	-1.9569	0	0	0	215.034	0	181.15	0	0	122.096
sp|Q9HCJ0|TNR6C_HUMAN Trinucleotide repeat-containing gene 6C protein OS=Homo sapiens OX=9606 GN=TNRC6C PE=1 SV=4	Q9HCJ0	4	Q9HCJ0_K4	61.161	MEEK(1)K(1)K(1)K(1)K	2	-3.1096	0	0	0	0	0	0	0	0	0
sp|Q9HCJ0|TNR6C_HUMAN Trinucleotide repeat-containing gene 6C protein OS=Homo sapiens OX=9606 GN=TNRC6C PE=1 SV=4	Q9HCJ0	5	Q9HCJ0_K5	61.161	MEEK(1)K(1)K(1)K(1)K	2	-3.1096	0	0	0	0	0	0	0	0	0
sp|Q9HCJ0|TNR6C_HUMAN Trinucleotide repeat-containing gene 6C protein OS=Homo sapiens OX=9606 GN=TNRC6C PE=1 SV=4	Q9HCJ0	6	Q9HCJ0_K6	61.161	MEEK(1)K(1)K(1)K(1)K	2	-3.1096	0	0	0	0	0	0	0	0	0
sp|Q9HCJ0|TNR6C_HUMAN Trinucleotide repeat-containing gene 6C protein OS=Homo sapiens OX=9606 GN=TNRC6C PE=1 SV=4	Q9HCJ0	7	Q9HCJ0_K7	61.161	MEEK(1)K(1)K(1)K(1)K	2	-3.1096	0	0	0	0	0	0	0	0	0
sp|Q9HCK8|CHD8_HUMAN Chromodomain-helicase-DNA-binding protein 8 OS=Homo sapiens OX=9606 GN=CHD8 PE=1 SV=5;sp|Q3L8U1|CHD9_HUMAN Chromodomain-helicase-DNA-binding protein 9 OS=Homo sapiens OX=9606 GN=CHD9 PE=1 SV=2;sp|Q9P2D1|CHD7_HUMAN Chromodomain-helicase	Q9HCK8;Q3L8U1;Q9P2D1	1301;1350;1458	Q9HCK8_K1301	84.916	K(1)EIEDLLR	2	-0.60912	0	0	0	465.865	612.628	0	405.21	0	113.385
sp|Q9HCK8|CHD8_HUMAN Chromodomain-helicase-DNA-binding protein 8 OS=Homo sapiens OX=9606 GN=CHD8 PE=1 SV=5	Q9HCK8	542	Q9HCK8_K542	75.294	LNTITPVVGK(1)K(1)R	2	-0.23226	0	0	0	0	0	9516.76	0	0	6784.3
sp|Q9HCK8|CHD8_HUMAN Chromodomain-helicase-DNA-binding protein 8 OS=Homo sapiens OX=9606 GN=CHD8 PE=1 SV=5	Q9HCK8	543	Q9HCK8_K543	75.294	LNTITPVVGK(1)K(1)R	2	-0.23226	0	0	0	0	0	9516.76	0	0	6784.3
sp|Q9HDC5|JPH1_HUMAN Junctophilin-1 OS=Homo sapiens OX=9606 GN=JPH1 PE=1 SV=2	Q9HDC5	445	Q9HDC5_K445	50.803	FQEGVDAKENPEEK(0.101)VPEK(0.899)PPTPK	3	1.8202	0	0	0	0	0	0	1395.46	0	0
sp|Q9NPC3|CIP1_HUMAN E3 ubiquitin-protein ligase CCNB1IP1 OS=Homo sapiens OX=9606 GN=CCNB1IP1 PE=1 SV=1	Q9NPC3	147	Q9NPC3_K147	43.162	GEVTSMK(0.987)K(0.997)VLEEYK(0.744)K(0.744)K(0.744)FSDISEK(0.783)LMER	3	0.99896	721.279	0	684.012	0	1113.26	1057.36	0	1423.04	568.038
sp|Q9NPC3|CIP1_HUMAN E3 ubiquitin-protein ligase CCNB1IP1 OS=Homo sapiens OX=9606 GN=CCNB1IP1 PE=1 SV=1	Q9NPC3	148	Q9NPC3_K148	43.162	GEVTSMK(0.987)K(0.997)VLEEYK(0.744)K(0.744)K(0.744)FSDISEK(0.783)LMER	3	0.99896	721.279	0	684.012	0	1113.26	1057.36	0	1423.04	568.038
sp|Q9NPC3|CIP1_HUMAN E3 ubiquitin-protein ligase CCNB1IP1 OS=Homo sapiens OX=9606 GN=CCNB1IP1 PE=1 SV=1	Q9NPC3	154	Q9NPC3_K154	43.162	GEVTSMK(0.987)K(0.997)VLEEYK(0.744)K(0.744)K(0.744)FSDISEK(0.783)LMER	3	0.99896	721.279	0	684.012	0	1113.26	1057.36	0	1423.04	568.038
sp|Q9NPC3|CIP1_HUMAN E3 ubiquitin-protein ligase CCNB1IP1 OS=Homo sapiens OX=9606 GN=CCNB1IP1 PE=1 SV=1	Q9NPC3	155	Q9NPC3_K155	43.162	GEVTSMK(0.987)K(0.997)VLEEYK(0.744)K(0.744)K(0.744)FSDISEK(0.783)LMER	3	0.99896	721.279	0	684.012	0	1113.26	1057.36	0	1423.04	568.038
sp|Q9NPC3|CIP1_HUMAN E3 ubiquitin-protein ligase CCNB1IP1 OS=Homo sapiens OX=9606 GN=CCNB1IP1 PE=1 SV=1	Q9NPC3	156	Q9NPC3_K156	43.162	GEVTSMK(0.987)K(0.997)VLEEYK(0.744)K(0.744)K(0.744)FSDISEK(0.783)LMER	3	0.99896	721.279	0	684.012	0	1113.26	1057.36	0	1423.04	568.038
sp|Q9NPC3|CIP1_HUMAN E3 ubiquitin-protein ligase CCNB1IP1 OS=Homo sapiens OX=9606 GN=CCNB1IP1 PE=1 SV=1	Q9NPC3	163	Q9NPC3_K163	43.162	GEVTSMK(0.987)K(0.997)VLEEYK(0.744)K(0.744)K(0.744)FSDISEK(0.783)LMER	3	0.99896	721.279	0	684.012	0	1113.26	1057.36	0	1423.04	568.038
sp|Q9NQ66|PLCB1_HUMAN 1-phosphatidylinositol 4,5-bisphosphate phosphodiesterase beta-1 OS=Homo sapiens OX=9606 GN=PLCB1 PE=1 SV=1	Q9NQ66	1065	Q9NQ66_K1065	85.533	EICEKEK(0.5)K(0.5)ELKK	2	-1.715	0	0	0	0	0	0	0	0	0
sp|Q9NQ66|PLCB1_HUMAN 1-phosphatidylinositol 4,5-bisphosphate phosphodiesterase beta-1 OS=Homo sapiens OX=9606 GN=PLCB1 PE=1 SV=1	Q9NQ66	1066	Q9NQ66_K1066	85.533	EICEKEK(0.5)K(0.5)ELKK	2	-1.715	0	0	0	0	0	0	0	0	0
sp|Q9NQW6|ANLN_HUMAN Anillin OS=Homo sapiens OX=9606 GN=ANLN PE=1 SV=2	Q9NQW6	22	Q9NQW6_K22	44.341	ENLQRK(0.999)MAERPTAAPRSMTHAK(0.001)RAR	3	-1.0269	30654.5	39968.1	28474.6	21525	18237.4	33359	16870.6	32204.1	19110.8
sp|Q9NR30|DDX21_HUMAN Nucleolar RNA helicase 2 OS=Homo sapiens OX=9606 GN=DDX21 PE=1 SV=5	Q9NR30	73	Q9NR30_K73	143.69	AEPSEVDMNSPK(1)SK(1)K(1)AK(1)K(1)K	2	-0.93641	138.318	0	0	71185.3	70100.5	65833	65211.1	103645	117346
sp|Q9NR30|DDX21_HUMAN Nucleolar RNA helicase 2 OS=Homo sapiens OX=9606 GN=DDX21 PE=1 SV=5	Q9NR30	75	Q9NR30_K75	143.69	AEPSEVDMNSPK(1)SK(1)K(1)AK(1)K(1)K	2	-0.93641	0	0	0	61793.7	61810	61203.1	58311.8	93663.2	117346
sp|Q9NR30|DDX21_HUMAN Nucleolar RNA helicase 2 OS=Homo sapiens OX=9606 GN=DDX21 PE=1 SV=5	Q9NR30	76	Q9NR30_K76	143.69	AEPSEVDMNSPK(1)SK(1)K(1)AK(1)K(1)K	2	-0.93641	0	0	0	61793.7	61810	61203.1	58311.8	93663.2	117346
sp|Q9NR30|DDX21_HUMAN Nucleolar RNA helicase 2 OS=Homo sapiens OX=9606 GN=DDX21 PE=1 SV=5	Q9NR30	78	Q9NR30_K78	63.894	AEPSEVDMNSPK(1)SK(1)K(1)AK(1)K(1)K	2	-0.93641	0	0	0	18940.6	26987.9	16466.6	7983.72	24848.4	22400.9
sp|Q9NR30|DDX21_HUMAN Nucleolar RNA helicase 2 OS=Homo sapiens OX=9606 GN=DDX21 PE=1 SV=5	Q9NR30	79	Q9NR30_K79	53.705	AEPSEVDMNSPK(1)SK(1)K(1)AK(1)K(1)K	2	-0.93641	0	0	0	5724.96	5643.17	6115.66	6431.81	0	0
sp|Q9NR30|DDX21_HUMAN Nucleolar RNA helicase 2 OS=Homo sapiens OX=9606 GN=DDX21 PE=1 SV=5	Q9NR30	91	Q9NR30_K91	133.05	EEPSQNDISPK(1)TK(1)SLR	2	0.6464	0	0	0	9926.3	15523	10911.8	16534.8	34598	29372.4
sp|Q9NR30|DDX21_HUMAN Nucleolar RNA helicase 2 OS=Homo sapiens OX=9606 GN=DDX21 PE=1 SV=5	Q9NR30	93	Q9NR30_K93	133.05	EEPSQNDISPK(1)TK(1)SLR	2	0.6464	0	0	0	9926.3	15523	10911.8	16534.8	34598	29372.4
sp|Q9NR30|DDX21_HUMAN Nucleolar RNA helicase 2 OS=Homo sapiens OX=9606 GN=DDX21 PE=1 SV=5	Q9NR30	129	Q9NR30_K129	115.56	NEEPSEEEIDAPK(1)PK(1)K	2	-0.030474	0	0	0	5014.31	39505.1	2714.5	4632.55	7976.11	0
sp|Q9NR30|DDX21_HUMAN Nucleolar RNA helicase 2 OS=Homo sapiens OX=9606 GN=DDX21 PE=1 SV=5	Q9NR30	131	Q9NR30_K131	144.4	NEEPSEEEIDAPK(1)PK(1)K	2	-0.030474	677.898	898.715	0	189248	120175	136748	99392.7	245768	224098
sp|Q9NR30|DDX21_HUMAN Nucleolar RNA helicase 2 OS=Homo sapiens OX=9606 GN=DDX21 PE=1 SV=5	Q9NR30	132	Q9NR30_K132	119.62	NEEPSEEEIDAPK(0.001)PK(0.999)K(1)MK(1)K	2	-0.48006	0	0	0	141783	120175	111950	78896	208910	185762
sp|Q9NR30|DDX21_HUMAN Nucleolar RNA helicase 2 OS=Homo sapiens OX=9606 GN=DDX21 PE=1 SV=5	Q9NR30	134	Q9NR30_K134	119.62	NEEPSEEEIDAPK(0.001)PK(0.999)K(1)MK(1)K	2	-0.48006	0	0	0	89025.9	77487.4	77081.5	54551.3	134790	136418
sp|Q9NR30|DDX21_HUMAN Nucleolar RNA helicase 2 OS=Homo sapiens OX=9606 GN=DDX21 PE=1 SV=5	Q9NR30	137	Q9NR30_K137	48.405	PK(0.774)K(0.221)MK(0.005)K(0.009)EK(0.991)EMNGETR	2	-0.7149	0	0	0	0	0	0	0	0	0
sp|Q9NR30|DDX21_HUMAN Nucleolar RNA helicase 2 OS=Homo sapiens OX=9606 GN=DDX21 PE=1 SV=5	Q9NR30	54	Q9NR30_K54	69.947	SDKTEEIAEEEETVFPK(1)AK(1)QVK(1)K	2	0.71388	0	0	0	0	6488.79	0	6480.4	10997.1	8699.52
sp|Q9NR30|DDX21_HUMAN Nucleolar RNA helicase 2 OS=Homo sapiens OX=9606 GN=DDX21 PE=1 SV=5	Q9NR30	56	Q9NR30_K56	69.947	SDKTEEIAEEEETVFPK(1)AK(1)QVK(1)K	2	0.71388	0	0	0	0	6488.79	0	6480.4	10997.1	8699.52
sp|Q9NR30|DDX21_HUMAN Nucleolar RNA helicase 2 OS=Homo sapiens OX=9606 GN=DDX21 PE=1 SV=5	Q9NR30	59	Q9NR30_K59	69.947	SDKTEEIAEEEETVFPK(1)AK(1)QVK(1)K	2	0.71388	0	0	0	0	6488.79	0	6480.4	10997.1	8699.52
sp|Q9NRJ5|PAPOB_HUMAN Poly(A) polymerase beta OS=Homo sapiens OX=9606 GN=PAPOLB PE=2 SV=2	Q9NRJ5	483	Q9NRJ5_K483	62.203	QAVNSK(0.071)MFEMGMK(0.929)ITAMHLR	2	1.4798	8687.16	5668.58	11564.9	14297.4	12167.2	13898.3	10931.7	9549.75	7129.46
sp|Q9NSI6|BRWD1_HUMAN Bromodomain and WD repeat-containing protein 1 OS=Homo sapiens OX=9606 GN=BRWD1 PE=1 SV=4	Q9NSI6	1399	Q9NSI6_K1399	47.113	SK(1)IYSMTLRLSALFEEK(0.209)MK(0.791)K	3	-3.6996	0	0	0	0	0	0	0	0	0
sp|Q9NSI6|BRWD1_HUMAN Bromodomain and WD repeat-containing protein 1 OS=Homo sapiens OX=9606 GN=BRWD1 PE=1 SV=4	Q9NSI6	1416	Q9NSI6_K1416	47.113	SK(1)IYSMTLRLSALFEEK(0.209)MK(0.791)K	3	-3.6996	0	0	0	0	0	0	0	0	0
sp|Q9NSV4|DIAP3_HUMAN Protein diaphanous homolog 3 OS=Homo sapiens OX=9606 GN=DIAPH3 PE=1 SV=4	Q9NSV4	703	Q9NSV4_K703	55.98	K(0.973)SIK(0.168)K(0.168)K(0.524)IK(0.167)ELKFLDSK	2	-0.061017	0	0	0	0	430942	65180.9	8692.48	964126	0
sp|Q9NSV4|DIAP3_HUMAN Protein diaphanous homolog 3 OS=Homo sapiens OX=9606 GN=DIAPH3 PE=1 SV=4	Q9NSV4	708	Q9NSV4_K708	55.98	K(0.973)SIK(0.168)K(0.168)K(0.524)IK(0.167)ELKFLDSK	2	-0.061017	0	0	0	0	430942	65180.9	8692.48	964126	0
sp|Q9NTG1|PKDRE_HUMAN Polycystin family receptor for egg jelly OS=Homo sapiens OX=9606 GN=PKDREJ PE=2 SV=2	Q9NTG1	446	Q9NTG1_K446	59.265	MVIRKDSRTAFSDK(1)R	2	2.7867	0	0	0	0	0	0	0	0	0
sp|Q9NU02|ANKE1_HUMAN Ankyrin repeat and EF-hand domain-containing protein 1 OS=Homo sapiens OX=9606 GN=ANKEF1 PE=1 SV=2	Q9NU02	416	Q9NU02_K416	55.721	K(1)EK(0.999)GMGK(0.966)K(0.566)GK(0.734)K(0.734)GK	2	0.11433	5763.69	2576.67	6208.82	6234.24	10306.5	8625.27	961.313	6724.83	6936.82
sp|Q9NU02|ANKE1_HUMAN Ankyrin repeat and EF-hand domain-containing protein 1 OS=Homo sapiens OX=9606 GN=ANKEF1 PE=1 SV=2	Q9NU02	418	Q9NU02_K418	55.721	K(1)EK(0.999)GMGK(0.966)K(0.566)GK(0.734)K(0.734)GK	2	0.11433	5763.69	2576.67	6208.82	6234.24	10306.5	8625.27	961.313	6724.83	6936.82
sp|Q9NU02|ANKE1_HUMAN Ankyrin repeat and EF-hand domain-containing protein 1 OS=Homo sapiens OX=9606 GN=ANKEF1 PE=1 SV=2	Q9NU02	422	Q9NU02_K422	55.721	K(1)EK(0.999)GMGK(0.966)K(0.566)GK(0.734)K(0.734)GK	2	0.11433	5763.69	2576.67	6208.82	6234.24	10306.5	8625.27	961.313	6724.83	6936.82
sp|Q9NU02|ANKE1_HUMAN Ankyrin repeat and EF-hand domain-containing protein 1 OS=Homo sapiens OX=9606 GN=ANKEF1 PE=1 SV=2	Q9NU02	425	Q9NU02_K425	55.721	K(1)EK(0.999)GMGK(0.966)K(0.566)GK(0.734)K(0.734)GK	2	0.11433	5763.69	2576.67	6208.82	6234.24	10306.5	8625.27	961.313	6724.83	6936.82
sp|Q9NU02|ANKE1_HUMAN Ankyrin repeat and EF-hand domain-containing protein 1 OS=Homo sapiens OX=9606 GN=ANKEF1 PE=1 SV=2	Q9NU02	426	Q9NU02_K426	55.721	K(1)EK(0.999)GMGK(0.966)K(0.566)GK(0.734)K(0.734)GK	2	0.11433	5763.69	2576.67	6208.82	6234.24	10306.5	8625.27	961.313	6724.83	6936.82
sp|Q9NU19|TB22B_HUMAN TBC1 domain family member 22B OS=Homo sapiens OX=9606 GN=TBC1D22B PE=1 SV=3	Q9NU19	37	Q9NU19_K37	97.473	LTK(1)NFIK	2	0.0068785	548.96	0	0	0	0	0	0	3207.27	0
sp|Q9NV06|DCA13_HUMAN DDB1- and CUL4-associated factor 13 OS=Homo sapiens OX=9606 GN=DCAF13 PE=1 SV=2	Q9NV06	398	Q9NV06_K398	110.51	HLPK(1)SIYSQIQEQR	3	-0.22481	0	0	0	27196.4	24499.7	14858.3	9013.81	10027.4	12461.8
sp|Q9NVA2|SEP11_HUMAN Septin-11 OS=Homo sapiens OX=9606 GN=SEPTIN11 PE=1 SV=3	Q9NVA2	418	Q9NVA2_K418	109.83	AAAQLLQSQAQQSGAQQTK(1)K	2	0.31486	0	0	0	7346.38	6285.75	4207.46	3388.34	11533.1	9599.66
sp|Q9NVP1|DDX18_HUMAN ATP-dependent RNA helicase DDX18 OS=Homo sapiens OX=9606 GN=DDX18 PE=1 SV=2	Q9NVP1	645	Q9NVP1_K645	132.5	GGGGGFGYQK(1)TK	1	-1.2805	0	0	0	0	0	5537.63	4070.97	14470.1	10655.5
sp|Q9NVP1|DDX18_HUMAN ATP-dependent RNA helicase DDX18 OS=Homo sapiens OX=9606 GN=DDX18 PE=1 SV=2	Q9NVP1	7	Q9NVP1_K7	74.92	SHLPMK(1)LLR	2	0.12142	0	0	0	20188.6	29631	0	0	47335.3	43147.4
sp|Q9NVU7|SDA1_HUMAN Protein SDA1 homolog OS=Homo sapiens OX=9606 GN=SDAD1 PE=1 SV=3	Q9NVU7	574	Q9NVU7_K574	92.239	ELDAAPGK(1)SQK(1)R	2	-0.69195	0	0	0	0	0	4625.54	4156.33	17062.9	17057.7
sp|Q9NVU7|SDA1_HUMAN Protein SDA1 homolog OS=Homo sapiens OX=9606 GN=SDAD1 PE=1 SV=3	Q9NVU7	577	Q9NVU7_K577	92.239	ELDAAPGK(1)SQK(1)R	2	-0.69195	0	0	0	0	0	4625.54	4156.33	17062.9	17057.7
sp|Q9NWB6|ARGL1_HUMAN Arginine and glutamate-rich protein 1 OS=Homo sapiens OX=9606 GN=ARGLU1 PE=1 SV=1	Q9NWB6	16	Q9NWB6_K16	111.86	HTK(1)SSK(1)HNK(1)K(1)R	3	0.97667	3835.16	2211.76	12623.3	15767.5	3315.35	4328.42	1894.08	0	0
sp|Q9NWB6|ARGL1_HUMAN Arginine and glutamate-rich protein 1 OS=Homo sapiens OX=9606 GN=ARGLU1 PE=1 SV=1	Q9NWB6	19	Q9NWB6_K19	111.86	HTK(1)SSK(1)HNK(1)K(1)R	3	0.97667	3835.16	2211.76	12623.3	15767.5	3315.35	4328.42	1894.08	0	0
sp|Q9NWB6|ARGL1_HUMAN Arginine and glutamate-rich protein 1 OS=Homo sapiens OX=9606 GN=ARGLU1 PE=1 SV=1	Q9NWB6	22	Q9NWB6_K22	100.18	HTK(1)SSK(1)HNK(1)K(1)R	3	0.97667	3520.06	2211.76	12296.6	15767.5	3315.35	4328.42	1894.08	0	0
sp|Q9NWB6|ARGL1_HUMAN Arginine and glutamate-rich protein 1 OS=Homo sapiens OX=9606 GN=ARGLU1 PE=1 SV=1	Q9NWB6	23	Q9NWB6_K23	100.18	HTK(1)SSK(1)HNK(1)K(1)R	3	0.97667	3520.06	2211.76	12296.6	15767.5	3315.35	4328.42	1894.08	0	0
sp|Q9NWH9|SLTM_HUMAN SAFB-like transcription modulator OS=Homo sapiens OX=9606 GN=SLTM PE=1 SV=2	Q9NWH9	461	Q9NWH9_K461	48.656	TELHGQLISVEK(0.008)VK(0.994)GDPSK(0.999)K(1)EMK	3	3.247	0	0	0	0	0	0	0	0	0
sp|Q9NWH9|SLTM_HUMAN SAFB-like transcription modulator OS=Homo sapiens OX=9606 GN=SLTM PE=1 SV=2	Q9NWH9	466	Q9NWH9_K466	48.656	TELHGQLISVEK(0.008)VK(0.994)GDPSK(0.999)K(1)EMK	3	3.247	0	0	0	0	0	0	0	0	0
sp|Q9NWH9|SLTM_HUMAN SAFB-like transcription modulator OS=Homo sapiens OX=9606 GN=SLTM PE=1 SV=2	Q9NWH9	467	Q9NWH9_K467	48.656	TELHGQLISVEK(0.008)VK(0.994)GDPSK(0.999)K(1)EMK	3	3.247	0	0	0	0	0	0	0	0	0
sp|Q9NWT1|PK1IP_HUMAN p21-activated protein kinase-interacting protein 1 OS=Homo sapiens OX=9606 GN=PAK1IP1 PE=1 SV=2	Q9NWT1	359	Q9NWT1_K359	132.97	GLTGDSK(1)K(1)ATK(1)ESGLISTK	2	0.48322	0	0	0	18827.6	19580.1	3979.79	39979.9	33583	24548.9
sp|Q9NWT1|PK1IP_HUMAN p21-activated protein kinase-interacting protein 1 OS=Homo sapiens OX=9606 GN=PAK1IP1 PE=1 SV=2	Q9NWT1	360	Q9NWT1_K360	132.97	GLTGDSK(1)K(1)ATK(1)ESGLISTK	2	0.48322	0	0	0	18827.6	19580.1	3979.79	39979.9	33583	24548.9
sp|Q9NWT1|PK1IP_HUMAN p21-activated protein kinase-interacting protein 1 OS=Homo sapiens OX=9606 GN=PAK1IP1 PE=1 SV=2	Q9NWT1	363	Q9NWT1_K363	82.367	GLTGDSK(1)K(1)ATK(1)ESGLISTK	2	0.48322	0	0	0	13263	14547.5	0	36435.2	28532.6	19189.4
sp|Q9NWT1|PK1IP_HUMAN p21-activated protein kinase-interacting protein 1 OS=Homo sapiens OX=9606 GN=PAK1IP1 PE=1 SV=2	Q9NWT1	374	Q9NWT1_K374	52.278	RK(1)MVEMLEK(1)K(1)R	2	1.0829	0	0	0	0	0	0	0	0	0
sp|Q9NWT1|PK1IP_HUMAN p21-activated protein kinase-interacting protein 1 OS=Homo sapiens OX=9606 GN=PAK1IP1 PE=1 SV=2	Q9NWT1	381	Q9NWT1_K381	52.278	RK(1)MVEMLEK(1)K(1)R	2	1.0829	0	0	0	0	0	0	0	0	0
sp|Q9NWT1|PK1IP_HUMAN p21-activated protein kinase-interacting protein 1 OS=Homo sapiens OX=9606 GN=PAK1IP1 PE=1 SV=2	Q9NWT1	382	Q9NWT1_K382	52.278	RK(1)MVEMLEK(1)K(1)R	2	1.0829	0	0	0	0	0	0	0	0	0
sp|Q9NX24|NHP2_HUMAN H/ACA ribonucleoprotein complex subunit 2 OS=Homo sapiens OX=9606 GN=NHP2 PE=1 SV=1	Q9NX24	5	Q9NX24_K5	71.529	IK(1)ADPDGPEAQAEACSGER	2	-2.7031	0	0	0	0	0	0	0	0	0
sp|Q9NX58|LYAR_HUMAN Cell growth-regulating nucleolar protein OS=Homo sapiens OX=9606 GN=LYAR PE=1 SV=3	Q9NX58	185	Q9NX58_K185	147.58	DAVEQQGEVK(1)K	2	0.27482	0	0	0	2635.41	9537.17	2558.47	5391.65	4456.08	20126.2
sp|Q9NX58|LYAR_HUMAN Cell growth-regulating nucleolar protein OS=Homo sapiens OX=9606 GN=LYAR PE=1 SV=3	Q9NX58	186	Q9NX58_K186	95.094	VKDAVEQQGEVK(1)K(1)NK(1)R	2	0.99042	0	0	0	0	5413.5	0	0	0	9415.62
sp|Q9NX58|LYAR_HUMAN Cell growth-regulating nucleolar protein OS=Homo sapiens OX=9606 GN=LYAR PE=1 SV=3	Q9NX58	283	Q9NX58_K283	95.273	HSEVETDSK(1)K(1)K(1)K	2	-0.61655	0	0	0	1943.43	2940.67	866.16	1052.55	0	8406.27
sp|Q9NX58|LYAR_HUMAN Cell growth-regulating nucleolar protein OS=Homo sapiens OX=9606 GN=LYAR PE=1 SV=3	Q9NX58	284	Q9NX58_K284	95.273	HSEVETDSK(1)K(1)K(1)K	2	-0.61655	0	0	0	1943.43	2940.67	866.16	1052.55	0	8406.27
sp|Q9NX58|LYAR_HUMAN Cell growth-regulating nucleolar protein OS=Homo sapiens OX=9606 GN=LYAR PE=1 SV=3	Q9NX58	285	Q9NX58_K285	95.273	HSEVETDSK(1)K(1)K(1)K	2	-0.61655	0	0	0	1943.43	2940.67	866.16	1052.55	0	8406.27
sp|Q9NX58|LYAR_HUMAN Cell growth-regulating nucleolar protein OS=Homo sapiens OX=9606 GN=LYAR PE=1 SV=3	Q9NX58	288	Q9NX58_K288	94.632	MK(1)LPEHPEGGEPEDDEAPAK	3	0.60517	0	0	0	9033.62	9360.05	0	12938	20162.7	22649.3
sp|Q9NX58|LYAR_HUMAN Cell growth-regulating nucleolar protein OS=Homo sapiens OX=9606 GN=LYAR PE=1 SV=3	Q9NX58	188	Q9NX58_K188	95.094	VKDAVEQQGEVK(1)K(1)NK(1)R	2	0.99042	0	0	0	0	5413.5	0	0	0	9415.62
sp|Q9NYF8|BCLF1_HUMAN Bcl-2-associated transcription factor 1 OS=Homo sapiens OX=9606 GN=BCLAF1 PE=1 SV=2	Q9NYF8	725	Q9NYF8_K725	53.001	QEK(0.993)TPK(0.97)DYK(0.034)EYK(0.003)SYK	4	-1.2925	0	0	0	0	2165.22	0	0	0	0
sp|Q9NYF8|BCLF1_HUMAN Bcl-2-associated transcription factor 1 OS=Homo sapiens OX=9606 GN=BCLAF1 PE=1 SV=2	Q9NYF8	728	Q9NYF8_K728	53.001	QEK(0.993)TPK(0.97)DYK(0.034)EYK(0.003)SYK	4	-1.2925	0	0	0	0	2165.22	0	0	0	0
sp|Q9NYI0|PSD3_HUMAN PH and SEC7 domain-containing protein 3 OS=Homo sapiens OX=9606 GN=PSD3 PE=1 SV=2	Q9NYI0	804	Q9NYI0_K804	54.772	K(0.004)IHADMDGK(0.491)K(0.505)TPRGK	2	3.2296	0	0	0	0	0	0	0	0	5299.25
sp|Q9NYJ8|TAB2_HUMAN TGF-beta-activated kinase 1 and MAP3K7-binding protein 2 OS=Homo sapiens OX=9606 GN=TAB2 PE=1 SV=1	Q9NYJ8	653	Q9NYJ8_K653	96.113	PKDQRSIIK(1)TPK	2	-2.2247	0	0	0	0	0	0	0	0	0
sp|Q9NYV4|CDK12_HUMAN Cyclin-dependent kinase 12 OS=Homo sapiens OX=9606 GN=CDK12 PE=1 SV=2	Q9NYV4	168	Q9NYV4_K168	72.243	AQVAK(1)SSSK(1)ESR	2	0.21257	0	0	0	0	0	4978.69	0	11282.9	6999.55
sp|Q9NYV4|CDK12_HUMAN Cyclin-dependent kinase 12 OS=Homo sapiens OX=9606 GN=CDK12 PE=1 SV=2	Q9NYV4	172	Q9NYV4_K172	72.243	AQVAK(1)SSSK(1)ESR	2	0.21257	0	0	0	0	0	4978.69	0	11282.9	6999.55
sp|Q9NYV4|CDK12_HUMAN Cyclin-dependent kinase 12 OS=Homo sapiens OX=9606 GN=CDK12 PE=1 SV=2	Q9NYV4	445	Q9NYV4_K445	54.368	KENSSVEAKDSGLESK(1)K(1)LPR	4	-0.8973	0	0	0	0	6085.6	9634.61	0	13585.2	0
sp|Q9NYV4|CDK12_HUMAN Cyclin-dependent kinase 12 OS=Homo sapiens OX=9606 GN=CDK12 PE=1 SV=2	Q9NYV4	446	Q9NYV4_K446	54.368	KENSSVEAKDSGLESK(1)K(1)LPR	4	-0.8973	0	0	0	0	6085.6	9634.61	0	13585.2	0
sp|Q9NZ81|PRR13_HUMAN Proline-rich protein 13 OS=Homo sapiens OX=9606 GN=PRR13 PE=1 SV=1	Q9NZ81	108	Q9NZ81_K108	49.632	K(0.997)MQK(0.98)K(0.904)MK(0.616)K(0.503)AHK	2	-1.0969	0	0	0	0	0	0	0	0	0
sp|Q9NZ81|PRR13_HUMAN Proline-rich protein 13 OS=Homo sapiens OX=9606 GN=PRR13 PE=1 SV=1	Q9NZ81	111	Q9NZ81_K111	49.632	K(0.997)MQK(0.98)K(0.904)MK(0.616)K(0.503)AHK	2	-1.0969	0	0	0	0	0	0	0	0	0
sp|Q9NZ81|PRR13_HUMAN Proline-rich protein 13 OS=Homo sapiens OX=9606 GN=PRR13 PE=1 SV=1	Q9NZ81	112	Q9NZ81_K112	49.632	K(0.997)MQK(0.98)K(0.904)MK(0.616)K(0.503)AHK	2	-1.0969	0	0	0	0	0	0	0	0	0
sp|Q9NZ81|PRR13_HUMAN Proline-rich protein 13 OS=Homo sapiens OX=9606 GN=PRR13 PE=1 SV=1	Q9NZ81	114	Q9NZ81_K114	49.632	K(0.997)MQK(0.98)K(0.904)MK(0.616)K(0.503)AHK	2	-1.0969	0	0	0	0	0	0	0	0	0
sp|Q9P0W2|HM20B_HUMAN SWI/SNF-related matrix-associated actin-dependent regulator of chromatin subfamily E member 1-related OS=Homo sapiens OX=9606 GN=HMG20B PE=1 SV=1	Q9P0W2	6	Q9P0W2_K6	105.66	SHGPK(1)QPGAAAAPAGGK	2	-0.66326	0	0	0	0	0	0	0	0	0
sp|Q9P0W8|SPAT7_HUMAN Spermatogenesis-associated protein 7 OS=Homo sapiens OX=9606 GN=SPATA7 PE=1 SV=3	Q9P0W8	90	Q9P0W8_K90	45.685	LK(1)K(1)ELAQCEK(1)EFK(1)LTK(1)TAMRANYK	3	-2.2194	0	0	0	0	0	0	0	6268.56	0
sp|Q9P0W8|SPAT7_HUMAN Spermatogenesis-associated protein 7 OS=Homo sapiens OX=9606 GN=SPATA7 PE=1 SV=3	Q9P0W8	91	Q9P0W8_K91	45.685	LK(1)K(1)ELAQCEK(1)EFK(1)LTK(1)TAMRANYK	3	-2.2194	0	0	0	0	0	0	0	6268.56	0
sp|Q9P0W8|SPAT7_HUMAN Spermatogenesis-associated protein 7 OS=Homo sapiens OX=9606 GN=SPATA7 PE=1 SV=3	Q9P0W8	98	Q9P0W8_K98	45.685	LK(1)K(1)ELAQCEK(1)EFK(1)LTK(1)TAMRANYK	3	-2.2194	0	0	0	0	0	0	0	6268.56	0
sp|Q9P0W8|SPAT7_HUMAN Spermatogenesis-associated protein 7 OS=Homo sapiens OX=9606 GN=SPATA7 PE=1 SV=3	Q9P0W8	101	Q9P0W8_K101	45.685	LK(1)K(1)ELAQCEK(1)EFK(1)LTK(1)TAMRANYK	3	-2.2194	0	0	0	0	0	0	0	6268.56	0
sp|Q9P0W8|SPAT7_HUMAN Spermatogenesis-associated protein 7 OS=Homo sapiens OX=9606 GN=SPATA7 PE=1 SV=3	Q9P0W8	104	Q9P0W8_K104	45.685	LK(1)K(1)ELAQCEK(1)EFK(1)LTK(1)TAMRANYK	3	-2.2194	0	0	0	0	0	0	0	6268.56	0
sp|Q9P2E9|RRBP1_HUMAN Ribosome-binding protein 1 OS=Homo sapiens OX=9606 GN=RRBP1 PE=1 SV=5	Q9P2E9	589	Q9P2E9_K589	65.495	K(1)ADAAANQGK(1)K(1)TESASVQGR	2	0.19753	0	0	0	0	0	0	336.913	888.445	659.198
sp|Q9P2E9|RRBP1_HUMAN Ribosome-binding protein 1 OS=Homo sapiens OX=9606 GN=RRBP1 PE=1 SV=5	Q9P2E9	598	Q9P2E9_K598	65.495	K(1)ADAAANQGK(1)K(1)TESASVQGR	2	0.19753	0	0	0	0	0	0	336.913	888.445	659.198
sp|Q9P2E9|RRBP1_HUMAN Ribosome-binding protein 1 OS=Homo sapiens OX=9606 GN=RRBP1 PE=1 SV=5	Q9P2E9	599	Q9P2E9_K599	65.495	K(1)ADAAANQGK(1)K(1)TESASVQGR	2	0.19753	0	0	0	0	0	0	336.913	888.445	659.198
sp|Q9P2E9|RRBP1_HUMAN Ribosome-binding protein 1 OS=Homo sapiens OX=9606 GN=RRBP1 PE=1 SV=5	Q9P2E9	620	Q9P2E9_K620	51.487	NTDVAQSPEAPK(0.819)QEAPAK(0.591)K(0.591)K	3	0.87348	0	0	0	0	4602.81	0	0	6530.48	5634.53
sp|Q9P2E9|RRBP1_HUMAN Ribosome-binding protein 1 OS=Homo sapiens OX=9606 GN=RRBP1 PE=1 SV=5	Q9P2E9	626	Q9P2E9_K626	51.487	NTDVAQSPEAPK(0.819)QEAPAK(0.591)K(0.591)K	3	0.87348	0	0	0	0	4602.81	0	0	6530.48	5634.53
sp|Q9P2E9|RRBP1_HUMAN Ribosome-binding protein 1 OS=Homo sapiens OX=9606 GN=RRBP1 PE=1 SV=5	Q9P2E9	627	Q9P2E9_K627	51.487	NTDVAQSPEAPK(0.819)QEAPAK(0.591)K(0.591)K	3	0.87348	0	0	0	0	4602.81	0	0	6530.48	5634.53
sp|Q9P2I0|CPSF2_HUMAN Cleavage and polyadenylation specificity factor subunit 2 OS=Homo sapiens OX=9606 GN=CPSF2 PE=1 SV=2	Q9P2I0	472	Q9P2I0_K472	41.482	QAK(0.001)K(0.004)SYPMFPAPEERIK(0.995)WDEYGEIIK	4	0.91314	0	0	0	10106.7	8831.59	5805.45	0	0	0
sp|Q9P2J5|SYLC_HUMAN Leucine--tRNA ligase, cytoplasmic OS=Homo sapiens OX=9606 GN=LARS1 PE=1 SV=2	Q9P2J5	987	Q9P2J5_K987	43.305	YMK(0.918)K(0.087)VMPFVAMIK(0.771)ENLEK(0.224)MGPR	2	-2.9066	0	0	0	0	0	0	0	0	0
sp|Q9P2J5|SYLC_HUMAN Leucine--tRNA ligase, cytoplasmic OS=Homo sapiens OX=9606 GN=LARS1 PE=1 SV=2	Q9P2J5	997	Q9P2J5_K997	43.305	YMK(0.918)K(0.087)VMPFVAMIK(0.771)ENLEK(0.224)MGPR	2	-2.9066	0	0	0	0	0	0	0	0	0
sp|Q9P2T1|GMPR2_HUMAN GMP reductase 2 OS=Homo sapiens OX=9606 GN=GMPR2 PE=1 SV=1	Q9P2T1	276	Q9P2T1_K276	40.819	K(0.036)YK(0.038)LFYGMSSEMAMK(0.724)K(0.203)YAGGVAEYR	3	-1.3838	0	2407.39	4921.2	15140.7	0	0	0	20242.5	0
sp|Q9UBP9|GULP1_HUMAN PTB domain-containing engulfment adapter protein 1 OS=Homo sapiens OX=9606 GN=GULP1 PE=1 SV=1	Q9UBP9	171	Q9UBP9_K171	77.741	QIAGLQK(1)R	2	1.0202	825.798	1003.8	775.888	0	0	0	0	0	0
sp|Q9UEY8|ADDG_HUMAN Gamma-adducin OS=Homo sapiens OX=9606 GN=ADD3 PE=1 SV=1	Q9UEY8	696	Q9UEY8_K696	101.38	TPSFLK(1)K(1)NK	2	0.8818	0	0	0	0	0	2035.17	1276.86	0	2863.47
sp|Q9UEY8|ADDG_HUMAN Gamma-adducin OS=Homo sapiens OX=9606 GN=ADD3 PE=1 SV=1	Q9UEY8	697	Q9UEY8_K697	101.38	TPSFLK(1)K(1)NK	2	0.8818	0	0	0	0	0	2035.17	1276.86	0	2863.47
sp|Q9UGF7|O12D3_HUMAN Olfactory receptor 12D3 OS=Homo sapiens OX=9606 GN=OR12D3 PE=2 SV=1	Q9UGF7	301	Q9UGF7_K301	55.37	NKEVMMALK(1)K	2	-1.7818	2513.68	953.966	0	0	0	4291.72	2770.77	0	0
sp|Q9UI10|EI2BD_HUMAN Translation initiation factor eIF2B subunit delta OS=Homo sapiens OX=9606 GN=EIF2B4 PE=1 SV=2	Q9UI10	41	Q9UI10_K41	60.436	K(1)EK(1)K(1)QQK(1)K(1)K(1)R	2	0.044158	29190.3	16378.4	18557.9	10998.1	0	0	0	0	0
sp|Q9UI10|EI2BD_HUMAN Translation initiation factor eIF2B subunit delta OS=Homo sapiens OX=9606 GN=EIF2B4 PE=1 SV=2	Q9UI10	43	Q9UI10_K43	60.436	K(1)EK(1)K(1)QQK(1)K(1)K(1)R	2	0.044158	29190.3	16378.4	18557.9	10998.1	0	0	0	0	0
sp|Q9UI10|EI2BD_HUMAN Translation initiation factor eIF2B subunit delta OS=Homo sapiens OX=9606 GN=EIF2B4 PE=1 SV=2	Q9UI10	44	Q9UI10_K44	60.436	K(1)EK(1)K(1)QQK(1)K(1)K(1)R	2	0.044158	29190.3	16378.4	18557.9	10998.1	0	0	0	0	0
sp|Q9UI10|EI2BD_HUMAN Translation initiation factor eIF2B subunit delta OS=Homo sapiens OX=9606 GN=EIF2B4 PE=1 SV=2	Q9UI10	47	Q9UI10_K47	60.436	K(1)EK(1)K(1)QQK(1)K(1)K(1)R	2	0.044158	29190.3	16378.4	18557.9	10998.1	0	0	0	0	0
sp|Q9UI10|EI2BD_HUMAN Translation initiation factor eIF2B subunit delta OS=Homo sapiens OX=9606 GN=EIF2B4 PE=1 SV=2	Q9UI10	48	Q9UI10_K48	60.436	K(1)EK(1)K(1)QQK(1)K(1)K(1)R	2	0.044158	29190.3	16378.4	18557.9	10998.1	0	0	0	0	0
sp|Q9UI10|EI2BD_HUMAN Translation initiation factor eIF2B subunit delta OS=Homo sapiens OX=9606 GN=EIF2B4 PE=1 SV=2	Q9UI10	49	Q9UI10_K49	60.436	K(1)EK(1)K(1)QQK(1)K(1)K(1)R	2	0.044158	29190.3	16378.4	18557.9	10998.1	0	0	0	0	0
sp|Q9UJV3|TRIM1_HUMAN Probable E3 ubiquitin-protein ligase MID2 OS=Homo sapiens OX=9606 GN=MID2 PE=1 SV=3	Q9UJV3	530	Q9UJV3_K530	53.773	LK(0.993)TNSQPFK(0.047)LDPK(0.961)MTHK(0.999)K(0.999)LK	3	3.5822	0	0	0	0	0	1540.61	0	0	0
sp|Q9UJV3|TRIM1_HUMAN Probable E3 ubiquitin-protein ligase MID2 OS=Homo sapiens OX=9606 GN=MID2 PE=1 SV=3	Q9UJV3	541	Q9UJV3_K541	53.773	LK(0.993)TNSQPFK(0.047)LDPK(0.961)MTHK(0.999)K(0.999)LK	3	3.5822	0	0	0	0	0	1540.61	0	0	0
sp|Q9UJV3|TRIM1_HUMAN Probable E3 ubiquitin-protein ligase MID2 OS=Homo sapiens OX=9606 GN=MID2 PE=1 SV=3	Q9UJV3	545	Q9UJV3_K545	53.773	LK(0.993)TNSQPFK(0.047)LDPK(0.961)MTHK(0.999)K(0.999)LK	3	3.5822	0	0	0	0	0	1540.61	0	0	0
sp|Q9UJV3|TRIM1_HUMAN Probable E3 ubiquitin-protein ligase MID2 OS=Homo sapiens OX=9606 GN=MID2 PE=1 SV=3	Q9UJV3	546	Q9UJV3_K546	53.773	LK(0.993)TNSQPFK(0.047)LDPK(0.961)MTHK(0.999)K(0.999)LK	3	3.5822	0	0	0	0	0	1540.61	0	0	0
sp|Q9UK53|ING1_HUMAN Inhibitor of growth protein 1 OS=Homo sapiens OX=9606 GN=ING1 PE=1 SV=2	Q9UK53	291	Q9UK53_K291	97.163	GEAAAQADK(0.05)PNSK(0.95)R	2	-0.92062	0	0	0	811.416	0	0	787.209	0	0
sp|Q9UK76|JUPI1_HUMAN Jupiter microtubule associated homolog 1 OS=Homo sapiens OX=9606 GN=JPT1 PE=1 SV=3	Q9UK76	8	Q9UK76_K8	49.089	MTTTTTFK(1)GVDPNSRNSSRVLR	3	-4.4745	0	0	0	0	0	0	0	0	0
sp|Q9UKD2|MRT4_HUMAN mRNA turnover protein 4 homolog OS=Homo sapiens OX=9606 GN=MRTO4 PE=1 SV=2	Q9UKD2	9	Q9UKD2_K9	72.315	DK(0.008)K(0.992)VSLTK(1)TAK(1)K	2	-0.30864	0	0	0	0	0	0	0	6336.56	0
sp|Q9UKD2|MRT4_HUMAN mRNA turnover protein 4 homolog OS=Homo sapiens OX=9606 GN=MRTO4 PE=1 SV=2	Q9UKD2	14	Q9UKD2_K14	72.315	DK(0.008)K(0.992)VSLTK(1)TAK(1)K	2	-0.30864	0	0	0	0	0	0	0	6336.56	0
sp|Q9UKD2|MRT4_HUMAN mRNA turnover protein 4 homolog OS=Homo sapiens OX=9606 GN=MRTO4 PE=1 SV=2	Q9UKD2	17	Q9UKD2_K17	72.315	DK(0.008)K(0.992)VSLTK(1)TAK(1)K	2	-0.30864	0	0	0	0	0	0	0	6336.56	0
sp|Q9UKN7|MYO15_HUMAN Unconventional myosin-XV OS=Homo sapiens OX=9606 GN=MYO15A PE=1 SV=2	Q9UKN7	95	Q9UKN7_K95	44.188	LMTQMRMGK(0.07)K(0.643)K(0.643)RAMK(0.643)GK	2	-1.6793	0	0	0	0	0	0	0	0	0
sp|Q9UKN7|MYO15_HUMAN Unconventional myosin-XV OS=Homo sapiens OX=9606 GN=MYO15A PE=1 SV=2	Q9UKN7	96	Q9UKN7_K96	44.188	LMTQMRMGK(0.07)K(0.643)K(0.643)RAMK(0.643)GK	2	-1.6793	0	0	0	0	0	0	0	0	0
sp|Q9UKN7|MYO15_HUMAN Unconventional myosin-XV OS=Homo sapiens OX=9606 GN=MYO15A PE=1 SV=2	Q9UKN7	100	Q9UKN7_K100	44.188	LMTQMRMGK(0.07)K(0.643)K(0.643)RAMK(0.643)GK	2	-1.6793	0	0	0	0	0	0	0	0	0
sp|Q9UKQ2|ADA28_HUMAN Disintegrin and metalloproteinase domain-containing protein 28 OS=Homo sapiens OX=9606 GN=ADAM28 PE=1 SV=3	Q9UKQ2	66	Q9UKQ2_K66	45.125	EAK(0.001)EPEQQEQFETELK(0.01)YK(0.017)MTINGK(0.987)IAVLYLK(0.993)K(0.993)NK	3	0.43276	33588.1	30438.8	30552.7	30685.1	31102.6	0	19128.6	37399	0
sp|Q9UKQ2|ADA28_HUMAN Disintegrin and metalloproteinase domain-containing protein 28 OS=Homo sapiens OX=9606 GN=ADAM28 PE=1 SV=3	Q9UKQ2	73	Q9UKQ2_K73	45.125	EAK(0.001)EPEQQEQFETELK(0.01)YK(0.017)MTINGK(0.987)IAVLYLK(0.993)K(0.993)NK	3	0.43276	33588.1	30438.8	30552.7	30685.1	31102.6	0	19128.6	37399	0
sp|Q9UKQ2|ADA28_HUMAN Disintegrin and metalloproteinase domain-containing protein 28 OS=Homo sapiens OX=9606 GN=ADAM28 PE=1 SV=3	Q9UKQ2	74	Q9UKQ2_K74	45.125	EAK(0.001)EPEQQEQFETELK(0.01)YK(0.017)MTINGK(0.987)IAVLYLK(0.993)K(0.993)NK	3	0.43276	33588.1	30438.8	30552.7	30685.1	31102.6	0	19128.6	37399	0
sp|Q9Y623|MYH4_HUMAN Myosin-4 OS=Homo sapiens OX=9606 GN=MYH4 PE=2 SV=2;sp|Q9UKX2|MYH2_HUMAN Myosin-2 OS=Homo sapiens OX=9606 GN=MYH2 PE=1 SV=1	Q9Y623;Q9UKX2	1787;1789	Q9Y623_K1787	56.872	MK(1)K(1)NMEQTVK(1)DLQLR	2	4.4394	0	0	0	0	0	0	0	0	0
sp|Q9Y623|MYH4_HUMAN Myosin-4 OS=Homo sapiens OX=9606 GN=MYH4 PE=2 SV=2;sp|Q9UKX2|MYH2_HUMAN Myosin-2 OS=Homo sapiens OX=9606 GN=MYH2 PE=1 SV=1	Q9Y623;Q9UKX2	1788;1790	Q9Y623_K1788	56.872	MK(1)K(1)NMEQTVK(1)DLQLR	2	4.4394	0	0	0	0	0	0	0	0	0
sp|Q9Y623|MYH4_HUMAN Myosin-4 OS=Homo sapiens OX=9606 GN=MYH4 PE=2 SV=2;sp|Q9UKX2|MYH2_HUMAN Myosin-2 OS=Homo sapiens OX=9606 GN=MYH2 PE=1 SV=1	Q9Y623;Q9UKX2	1795;1797	Q9Y623_K1795	56.872	MK(1)K(1)NMEQTVK(1)DLQLR	2	4.4394	0	0	0	0	0	0	0	0	0
sp|Q9UKX3|MYH13_HUMAN Myosin-13 OS=Homo sapiens OX=9606 GN=MYH13 PE=2 SV=2	Q9UKX3	49	Q9UKX3_K49	43.291	K(0.013)ACFVADNK(0.052)EMYVK(0.935)GMIQTRENDK(0.042)VIVK(0.958)TLDDR	3	-1.5858	4896.09	0	0	0	0	0	3955	0	0
sp|Q9UKX3|MYH13_HUMAN Myosin-13 OS=Homo sapiens OX=9606 GN=MYH13 PE=2 SV=2	Q9UKX3	63	Q9UKX3_K63	43.291	K(0.013)ACFVADNK(0.052)EMYVK(0.935)GMIQTRENDK(0.042)VIVK(0.958)TLDDR	3	-1.5858	4896.09	0	0	0	0	0	3955	0	0
sp|Q9UKY7|CDV3_HUMAN Protein CDV3 homolog OS=Homo sapiens OX=9606 GN=CDV3 PE=1 SV=1	Q9UKY7	15	Q9UKY7_K15	142	SLDNFFAK(1)R	2	-0.50993	0	0	0	20375.8	23353.1	21077.8	0	0	80305.5
sp|Q9ULJ8|NEB1_HUMAN Neurabin-1 OS=Homo sapiens OX=9606 GN=PPP1R9A PE=1 SV=2	Q9ULJ8	1046	Q9ULJ8_K1046	61.435	LK(0.916)EMK(0.083)MSLEK(0.001)AR	2	-0.47652	0	1282.81	0	0	0	0	0	4613.48	3882.34
sp|Q9ULW0|TPX2_HUMAN Targeting protein for Xklp2 OS=Homo sapiens OX=9606 GN=TPX2 PE=1 SV=2	Q9ULW0	641	Q9ULW0_K641	89.353	ARPNTVISQEPFVPK(1)K	3	-0.045333	0	0	0	39683.3	41308.6	20252.5	10525	64448.5	0
sp|Q9UQ35|SRRM2_HUMAN Serine/arginine repetitive matrix protein 2 OS=Homo sapiens OX=9606 GN=SRRM2 PE=1 SV=2	Q9UQ35	161	Q9UQ35_K161	98.337	EAK(1)QPAPEPPKPYSLVR	2	0.11048	0	0	0	15491.8	0	9228.91	4528.79	8531.02	13535.8
sp|Q9UQ35|SRRM2_HUMAN Serine/arginine repetitive matrix protein 2 OS=Homo sapiens OX=9606 GN=SRRM2 PE=1 SV=2	Q9UQ35	2602	Q9UQ35_K2602	79.337	EGRPPEPTPAK(1)R	3	0.64714	363.537	0	9189.68	43301.1	33534.3	23674.1	12227.1	56225.6	42612.4
sp|Q9UQ35|SRRM2_HUMAN Serine/arginine repetitive matrix protein 2 OS=Homo sapiens OX=9606 GN=SRRM2 PE=1 SV=2;sp|A8MW92|P20L1_HUMAN PHD finger protein 20-like protein 1 OS=Homo sapiens OX=9606 GN=PHF20L1 PE=1 SV=2	Q9UQ35;A8MW92	188;569	Q9UQ35_K188	65.157	QK(1)K(1)K(1)K(1)K(1)K(1)K	2	0.49299	2853.97	14134.7	18123.7	5122.74	5579.82	9555.42	6007.6	5486.14	4802.85
sp|Q9UQ35|SRRM2_HUMAN Serine/arginine repetitive matrix protein 2 OS=Homo sapiens OX=9606 GN=SRRM2 PE=1 SV=2;sp|A8MW92|P20L1_HUMAN PHD finger protein 20-like protein 1 OS=Homo sapiens OX=9606 GN=PHF20L1 PE=1 SV=2	Q9UQ35;A8MW92	189;570	Q9UQ35_K189	65.157	QK(1)K(1)K(1)K(1)K(1)K(1)K	2	0.49299	2853.97	14134.7	18123.7	5122.74	5579.82	9555.42	6007.6	5486.14	4802.85
sp|Q9UQ35|SRRM2_HUMAN Serine/arginine repetitive matrix protein 2 OS=Homo sapiens OX=9606 GN=SRRM2 PE=1 SV=2;sp|A8MW92|P20L1_HUMAN PHD finger protein 20-like protein 1 OS=Homo sapiens OX=9606 GN=PHF20L1 PE=1 SV=2	Q9UQ35;A8MW92	190;571	Q9UQ35_K190	65.157	QK(1)K(1)K(1)K(1)K(1)K(1)K	2	0.49299	2853.97	14134.7	18123.7	5122.74	5579.82	9555.42	6007.6	5486.14	4802.85
sp|Q9UQ35|SRRM2_HUMAN Serine/arginine repetitive matrix protein 2 OS=Homo sapiens OX=9606 GN=SRRM2 PE=1 SV=2;sp|A8MW92|P20L1_HUMAN PHD finger protein 20-like protein 1 OS=Homo sapiens OX=9606 GN=PHF20L1 PE=1 SV=2	Q9UQ35;A8MW92	191;572	Q9UQ35_K191	65.157	QK(1)K(1)K(1)K(1)K(1)K(1)K	2	0.49299	2853.97	14134.7	18123.7	5122.74	5579.82	9555.42	6007.6	5486.14	4802.85
sp|Q9UQ35|SRRM2_HUMAN Serine/arginine repetitive matrix protein 2 OS=Homo sapiens OX=9606 GN=SRRM2 PE=1 SV=2;sp|A8MW92|P20L1_HUMAN PHD finger protein 20-like protein 1 OS=Homo sapiens OX=9606 GN=PHF20L1 PE=1 SV=2	Q9UQ35;A8MW92	192;573	Q9UQ35_K192	65.157	QK(1)K(1)K(1)K(1)K(1)K(1)K	2	0.49299	2853.97	14134.7	18123.7	5122.74	5579.82	9555.42	6007.6	5486.14	4802.85
sp|Q9UQ35|SRRM2_HUMAN Serine/arginine repetitive matrix protein 2 OS=Homo sapiens OX=9606 GN=SRRM2 PE=1 SV=2;sp|A8MW92|P20L1_HUMAN PHD finger protein 20-like protein 1 OS=Homo sapiens OX=9606 GN=PHF20L1 PE=1 SV=2	Q9UQ35;A8MW92	193;574	Q9UQ35_K193	65.157	QK(1)K(1)K(1)K(1)K(1)K(1)K	2	0.49299	2853.97	14134.7	18123.7	5122.74	5579.82	9555.42	6007.6	5486.14	4802.85
sp|Q9UQN3|CHM2B_HUMAN Charged multivesicular body protein 2b OS=Homo sapiens OX=9606 GN=CHMP2B PE=1 SV=1	Q9UQN3	6	Q9UQN3_K6	82.452	ASLFK(1)K(1)K	2	-0.45	0	0	0	0	0	0	0	0	0
sp|Q9UQN3|CHM2B_HUMAN Charged multivesicular body protein 2b OS=Homo sapiens OX=9606 GN=CHMP2B PE=1 SV=1	Q9UQN3	7	Q9UQN3_K7	82.452	ASLFK(1)K(1)K	2	-0.45	0	0	0	0	0	0	0	0	0
sp|Q9UQR0|SCML2_HUMAN Sex comb on midleg-like protein 2 OS=Homo sapiens OX=9606 GN=SCML2 PE=1 SV=1	Q9UQR0	296	Q9UQR0_K296	112.64	IKPPGPTAVPK(1)R	3	0.24817	0	0	0	19419.2	21611.9	17348.8	7933.38	37325.5	45420.8
sp|Q9UQR1|ZN148_HUMAN Zinc finger protein 148 OS=Homo sapiens OX=9606 GN=ZNF148 PE=1 SV=2	Q9UQR1	142	Q9UQR1_K142	84.289	EPVDLQK(1)K(1)K(1)K(1)R	2	-0.036848	0	0	0	3293.17	5794.37	9787.85	4632.55	14802.5	17386.9
sp|Q9UQR1|ZN148_HUMAN Zinc finger protein 148 OS=Homo sapiens OX=9606 GN=ZNF148 PE=1 SV=2	Q9UQR1	143	Q9UQR1_K143	84.289	EPVDLQK(1)K(1)K(1)K(1)R	2	-0.036848	0	0	0	3293.17	5794.37	9787.85	4632.55	14802.5	17386.9
sp|Q9UQR1|ZN148_HUMAN Zinc finger protein 148 OS=Homo sapiens OX=9606 GN=ZNF148 PE=1 SV=2	Q9UQR1	144	Q9UQR1_K144	84.289	EPVDLQK(1)K(1)K(1)K(1)R	2	-0.036848	0	0	0	3293.17	5794.37	9787.85	4632.55	14802.5	17386.9
sp|Q9UQR1|ZN148_HUMAN Zinc finger protein 148 OS=Homo sapiens OX=9606 GN=ZNF148 PE=1 SV=2	Q9UQR1	145	Q9UQR1_K145	84.289	EPVDLQK(1)K(1)K(1)K(1)R	2	-0.036848	0	0	0	3293.17	5794.37	9787.85	4632.55	14802.5	17386.9
sp|Q9UQR1|ZN148_HUMAN Zinc finger protein 148 OS=Homo sapiens OX=9606 GN=ZNF148 PE=1 SV=2	Q9UQR1	319	Q9UQR1_K319	65.565	QK(0.742)TEK(0.253)K(0.005)SSGMDKESALDKSDLK	2	0.082308	0	0	0	0	0	0	0	0	0
sp|Q9Y237|PIN4_HUMAN Peptidyl-prolyl cis-trans isomerase NIMA-interacting 4 OS=Homo sapiens OX=9606 GN=PIN4 PE=1 SV=1	Q9Y237	26	Q9Y237_K26	116.19	GGAASGSDSADK(1)K(1)AQGPK	2	0.14408	0	0	0	572.722	0	0	1156.47	4118.47	2959.75
sp|Q9Y237|PIN4_HUMAN Peptidyl-prolyl cis-trans isomerase NIMA-interacting 4 OS=Homo sapiens OX=9606 GN=PIN4 PE=1 SV=1	Q9Y237	27	Q9Y237_K27	116.19	GGAASGSDSADK(1)K(1)AQGPK	2	0.14408	0	0	0	572.722	0	0	1156.47	4118.47	2959.75
sp|Q9Y237|PIN4_HUMAN Peptidyl-prolyl cis-trans isomerase NIMA-interacting 4 OS=Homo sapiens OX=9606 GN=PIN4 PE=1 SV=1	Q9Y237	6	Q9Y237_K6	61.958	PPK(0.152)GK(0.848)SGSGK(1)AGK	2	-0.33921	0	0	0	0	0	0	0	0	0
sp|Q9Y237|PIN4_HUMAN Peptidyl-prolyl cis-trans isomerase NIMA-interacting 4 OS=Homo sapiens OX=9606 GN=PIN4 PE=1 SV=1	Q9Y237	11	Q9Y237_K11	61.958	PPK(0.152)GK(0.848)SGSGK(1)AGK	2	-0.33921	0	0	0	0	0	0	0	0	0
sp|Q9Y2D5|PLAK2_HUMAN PALM2-AKAP2 fusion protein OS=Homo sapiens OX=9606 GN=PALM2AKAP2 PE=1 SV=4	Q9Y2D5	983	Q9Y2D5_K983	49.66	TK(1)NAPSLPSRTCYK(1)TAPGK(1)IEK(1)VK	3	2.7616	0	0	0	0	0	0	0	0	0
sp|Q9Y2D5|PLAK2_HUMAN PALM2-AKAP2 fusion protein OS=Homo sapiens OX=9606 GN=PALM2AKAP2 PE=1 SV=4	Q9Y2D5	995	Q9Y2D5_K995	49.66	TK(1)NAPSLPSRTCYK(1)TAPGK(1)IEK(1)VK	3	2.7616	0	0	0	0	0	0	0	0	0
sp|Q9Y2D5|PLAK2_HUMAN PALM2-AKAP2 fusion protein OS=Homo sapiens OX=9606 GN=PALM2AKAP2 PE=1 SV=4	Q9Y2D5	1000	Q9Y2D5_K1000	49.66	TK(1)NAPSLPSRTCYK(1)TAPGK(1)IEK(1)VK	3	2.7616	0	0	0	0	0	0	0	0	0
sp|Q9Y2D5|PLAK2_HUMAN PALM2-AKAP2 fusion protein OS=Homo sapiens OX=9606 GN=PALM2AKAP2 PE=1 SV=4	Q9Y2D5	1003	Q9Y2D5_K1003	49.66	TK(1)NAPSLPSRTCYK(1)TAPGK(1)IEK(1)VK	3	2.7616	0	0	0	0	0	0	0	0	0
sp|Q9Y2H0|DLGP4_HUMAN Disks large-associated protein 4 OS=Homo sapiens OX=9606 GN=DLGAP4 PE=1 SV=3	Q9Y2H0	170	Q9Y2H0_K170	42.209	VGGNGSK(1)K(0.998)GGMEDGK(0.002)GRRAK	2	-1.0989	0	4700.32	5167.94	7199.85	0	0	9079.48	14803.8	21172.2
sp|Q9Y2H0|DLGP4_HUMAN Disks large-associated protein 4 OS=Homo sapiens OX=9606 GN=DLGAP4 PE=1 SV=3	Q9Y2H0	171	Q9Y2H0_K171	42.209	VGGNGSK(1)K(0.998)GGMEDGK(0.002)GRRAK	2	-1.0989	0	4700.32	5167.94	7199.85	0	0	9079.48	14803.8	21172.2
sp|Q9Y2K9|STB5L_HUMAN Syntaxin-binding protein 5-like OS=Homo sapiens OX=9606 GN=STXBP5L PE=1 SV=2	Q9Y2K9	301	Q9Y2K9_K301	44.312	K(1)SESCK(1)PILK(0.971)VEYK(0.03)TCK	4	-0.83557	928.468	0	0	0	0	2442.35	0	6574.14	0
sp|Q9Y2K9|STB5L_HUMAN Syntaxin-binding protein 5-like OS=Homo sapiens OX=9606 GN=STXBP5L PE=1 SV=2	Q9Y2K9	306	Q9Y2K9_K306	44.312	K(1)SESCK(1)PILK(0.971)VEYK(0.03)TCK	4	-0.83557	928.468	0	0	0	0	2442.35	0	6574.14	0
sp|Q9Y2K9|STB5L_HUMAN Syntaxin-binding protein 5-like OS=Homo sapiens OX=9606 GN=STXBP5L PE=1 SV=2	Q9Y2K9	310	Q9Y2K9_K310	44.312	K(1)SESCK(1)PILK(0.971)VEYK(0.03)TCK	4	-0.83557	928.468	0	0	0	0	2442.35	0	6574.14	0
sp|Q9Y2S6|TMA7_HUMAN Translation machinery-associated protein 7 OS=Homo sapiens OX=9606 GN=TMA7 PE=1 SV=1	Q9Y2S6	30	Q9Y2S6_K30	105.36	EMDEEDKAFK(1)QK	2	0.88524	0	0	0	8764.14	8276.85	2965.46	5109.29	11166.2	7964.96
sp|Q9Y2S6|TMA7_HUMAN Translation machinery-associated protein 7 OS=Homo sapiens OX=9606 GN=TMA7 PE=1 SV=1;sp|A0A024R1R8|TMA7B_HUMAN Translation machinery-associated protein 7B OS=Homo sapiens OX=9606 GN=TMA7B PE=3 SV=1	Q9Y2S6;A0A024R1R8	59;59	Q9Y2S6_K59	160.46	GPLATGGIK(1)K(1)SGK(1)K	2	0.041866	0	0	0	115442	109645	107534	154207	269455	43841.5
sp|Q9Y2S6|TMA7_HUMAN Translation machinery-associated protein 7 OS=Homo sapiens OX=9606 GN=TMA7 PE=1 SV=1;sp|A0A024R1R8|TMA7B_HUMAN Translation machinery-associated protein 7B OS=Homo sapiens OX=9606 GN=TMA7B PE=3 SV=1	Q9Y2S6;A0A024R1R8	60;60	Q9Y2S6_K60	160.46	GPLATGGIK(1)K(1)SGK(1)K	2	0.041866	0	0	0	107635	105905	107534	152219	259989	31904.4
sp|Q9Y2S6|TMA7_HUMAN Translation machinery-associated protein 7 OS=Homo sapiens OX=9606 GN=TMA7 PE=1 SV=1;sp|A0A024R1R8|TMA7B_HUMAN Translation machinery-associated protein 7B OS=Homo sapiens OX=9606 GN=TMA7B PE=3 SV=1	Q9Y2S6;A0A024R1R8	63;63	Q9Y2S6_K63	86.189	GPLATGGIK(1)K(1)SGK(1)K	2	0.041866	0	0	0	5026.89	2851.36	4406.44	8460.46	26379.2	51343.2
sp|Q9Y2W1|TR150_HUMAN Thyroid hormone receptor-associated protein 3 OS=Homo sapiens OX=9606 GN=THRAP3 PE=1 SV=2	Q9Y2W1	3	Q9Y2W1_K3	74.165	SK(1)TNK(1)SK	2	1.0688	0	0	0	0	0	2427.31	10144.1	5292.64	6794.17
sp|Q9Y2W1|TR150_HUMAN Thyroid hormone receptor-associated protein 3 OS=Homo sapiens OX=9606 GN=THRAP3 PE=1 SV=2	Q9Y2W1	6	Q9Y2W1_K6	74.165	SK(1)TNK(1)SK	2	1.0688	0	0	0	0	0	2427.31	10144.1	5292.64	6794.17
sp|Q9Y2W1|TR150_HUMAN Thyroid hormone receptor-associated protein 3 OS=Homo sapiens OX=9606 GN=THRAP3 PE=1 SV=2	Q9Y2W1	527	Q9Y2W1_K527	106.42	VTAYK(1)AVQEK	2	0.28572	0	0	0	8953.59	0	6754.24	8360.65	0	12930.2
sp|Q9Y2W2|WBP11_HUMAN WW domain-binding protein 11 OS=Homo sapiens OX=9606 GN=WBP11 PE=1 SV=1	Q9Y2W2	10	Q9Y2W2_K10	94.61	STSSTK(1)SGK(1)FMNPTDQAR	2	-0.20388	0	0	0	18785	21289.3	7820.4	6023.8	36233.3	37951
sp|Q9Y2W2|WBP11_HUMAN WW domain-binding protein 11 OS=Homo sapiens OX=9606 GN=WBP11 PE=1 SV=1	Q9Y2W2	13	Q9Y2W2_K13	94.61	STSSTK(1)SGK(1)FMNPTDQAR	2	-0.20388	0	0	0	18785	21289.3	7820.4	6023.8	36233.3	37951
sp|Q9Y2X3|NOP58_HUMAN Nucleolar protein 58 OS=Homo sapiens OX=9606 GN=NOP58 PE=1 SV=1	Q9Y2X3	457	Q9Y2X3_K457	113.07	KIEQVDKEDEITEK(1)K	2	0.36536	0	0	0	3889.26	3170.99	2372.76	0	5611.23	8534.27
sp|Q9Y2X3|NOP58_HUMAN Nucleolar protein 58 OS=Homo sapiens OX=9606 GN=NOP58 PE=1 SV=1	Q9Y2X3	485	Q9Y2X3_K485	130.47	VAEEEETSVK(1)K(1)K	2	0.33359	0	0	0	13674.2	13064.3	10459.5	10536.8	0	12256.4
sp|Q9Y2X3|NOP58_HUMAN Nucleolar protein 58 OS=Homo sapiens OX=9606 GN=NOP58 PE=1 SV=1	Q9Y2X3	486	Q9Y2X3_K486	130.47	VAEEEETSVK(1)K(1)K	2	0.33359	0	0	0	13674.2	13064.3	10459.5	10536.8	0	12256.4
sp|Q9Y3B9|RRP15_HUMAN RRP15-like protein OS=Homo sapiens OX=9606 GN=RRP15 PE=1 SV=2	Q9Y3B9	179	Q9Y3B9_K179	90.385	GVVQLFNAVQK(1)HQK(1)NVDEK	3	0.39879	0	0	0	0	8029.9	0	19375.1	19904.2	9769.37
sp|Q9Y3B9|RRP15_HUMAN RRP15-like protein OS=Homo sapiens OX=9606 GN=RRP15 PE=1 SV=2	Q9Y3B9	182	Q9Y3B9_K182	90.385	GVVQLFNAVQK(1)HQK(1)NVDEK	3	0.39879	0	0	0	0	8029.9	0	19375.1	19904.2	9769.37
sp|Q9Y3C1|NOP16_HUMAN Nucleolar protein 16 OS=Homo sapiens OX=9606 GN=NOP16 PE=1 SV=2	Q9Y3C1	74	Q9Y3C1_K74	94.09	VK(1)AMEVDIEERPK	2	1.3199	0	0	0	0	0	0	0	4756.2	6220.08
sp|Q9Y3D7|TIM16_HUMAN Mitochondrial import inner membrane translocase subunit TIM16 OS=Homo sapiens OX=9606 GN=PAM16 PE=1 SV=2	Q9Y3D7	3	Q9Y3D7_K3	44.816	AK(1)YLAQIIVMGVQVVGRAFAR	3	1.5372	0	0	0	0	0	0	0	0	0
sp|Q9Y5B9|SP16H_HUMAN FACT complex subunit SPT16 OS=Homo sapiens OX=9606 GN=SUPT16H PE=1 SV=1	Q9Y5B9	1043	Q9Y5B9_K1043	114.86	HSSAPPK(1)K(1)K(1)R	2	0.5	0	0	1960.7	14488.8	11689.2	7522.3	1793.39	15651.3	8482.69
sp|Q9Y5B9|SP16H_HUMAN FACT complex subunit SPT16 OS=Homo sapiens OX=9606 GN=SUPT16H PE=1 SV=1	Q9Y5B9	1044	Q9Y5B9_K1044	99.53	HSSAPPK(1)K(1)K(1)R	2	0.5	0	0	0	11065.9	8923.03	5268.41	1793.39	14083.1	7479.39
sp|Q9Y5B9|SP16H_HUMAN FACT complex subunit SPT16 OS=Homo sapiens OX=9606 GN=SUPT16H PE=1 SV=1	Q9Y5B9	1045	Q9Y5B9_K1045	99.53	HSSAPPK(1)K(1)K(1)R	2	0.5	0	0	0	11065.9	8923.03	5268.41	1793.39	14083.1	7479.39
sp|Q9Y5V0|ZN706_HUMAN Zinc finger protein 706 OS=Homo sapiens OX=9606 GN=ZNF706 PE=1 SV=1	Q9Y5V0	7	Q9Y5V0_K7	96.143	GQQK(1)IQSQQK(1)NAK(1)K(1)QAGQK	2	-1.073	0	0	0	0	0	0	2244.04	4594.17	0
sp|Q9Y5V0|ZN706_HUMAN Zinc finger protein 706 OS=Homo sapiens OX=9606 GN=ZNF706 PE=1 SV=1	Q9Y5V0	13	Q9Y5V0_K13	96.143	IQSQQK(1)NAK(1)K(1)QAGQK	2	0.28298	0	0	0	11858.8	8758.15	6238.16	6571.46	14020.1	16177.6
sp|Q9Y5V0|ZN706_HUMAN Zinc finger protein 706 OS=Homo sapiens OX=9606 GN=ZNF706 PE=1 SV=1	Q9Y5V0	16	Q9Y5V0_K16	96.143	IQSQQK(1)NAK(1)K(1)QAGQK	2	0.28298	0	0	0	11858.8	8758.15	6238.16	6571.46	14020.1	16177.6
sp|Q9Y5V0|ZN706_HUMAN Zinc finger protein 706 OS=Homo sapiens OX=9606 GN=ZNF706 PE=1 SV=1	Q9Y5V0	17	Q9Y5V0_K17	96.143	IQSQQK(1)NAK(1)K(1)QAGQK	2	0.28298	0	0	0	11858.8	8758.15	6238.16	6571.46	14020.1	16177.6
sp|Q9Y657|SPIN1_HUMAN Spindlin-1 OS=Homo sapiens OX=9606 GN=SPIN1 PE=1 SV=3	Q9Y657	2	Q9Y657_K2	117.93	MK(1)TPFGK(1)TPGQR	2	0.19273	0	0	0	15480.2	17759.3	18648.3	11073.5	26490.5	21578.5
sp|Q9Y657|SPIN1_HUMAN Spindlin-1 OS=Homo sapiens OX=9606 GN=SPIN1 PE=1 SV=3	Q9Y657	7	Q9Y657_K7	117.93	MK(1)TPFGK(1)TPGQR	2	0.19273	0	0	0	15480.2	17759.3	18648.3	11073.5	26490.5	21578.5
