# Supplementary material for: A constitutional isomer selective chemical proteomic strategy for system-wide profiling of protein lysine 5-hydroxylation
Source: Chem Sci. 2024 Oct 8;15(44):18395–404. doi: 10.1039/d4sc05397d (PMC11474802; doi:10.1039/d4sc05397d)
Supplement: SC-015-D4SC05397D-s003 [file SC-015-D4SC05397D-s003.xlsx]

## Sheet: Hydroxylysine_methoxyamineSites
Fasta headers	Proteins	Positions within proteins	Protein_position	Score	Hydroxylysine_methoxyamine Probabilities	Charge	Mass error [ppm]
sp|A0A1B0GV03|GG6L7_HUMAN Golgin subfamily A member 6-like protein 7 OS=Homo sapiens OX=9606 GN=GOLGA6L7 PE=3 SV=1	A0A1B0GV03	526	A0A1B0GV03_K526	91.9	QVEK(1)RREK(1)K	2	-3.9041
sp|A0A1B0GV03|GG6L7_HUMAN Golgin subfamily A member 6-like protein 7 OS=Homo sapiens OX=9606 GN=GOLGA6L7 PE=3 SV=1	A0A1B0GV03	530	A0A1B0GV03_K530	91.9	QVEK(1)RREK(1)K	2	-3.9041
sp|A0A2R8Y619|H2BK1_HUMAN Histone H2B type 2-K1 OS=Homo sapiens OX=9606 GN=H2BK1 PE=3 SV=1;sp|O60814|H2B1K_HUMAN Histone H2B type 1-K OS=Homo sapiens OX=9606 GN=H2BC12 PE=1 SV=3;sp|P62807|H2B1C_HUMAN Histone H2B type 1-C/E/F/G/I OS=Homo sapiens OX=9606 GN=	A0A2R8Y619	113	A0A2R8Y619_K113	109.83	HAVSEGTK(1)AVTK	2	-0.45645
sp|A0A2R8Y619|H2BK1_HUMAN Histone H2B type 2-K1 OS=Homo sapiens OX=9606 GN=H2BK1 PE=3 SV=1;sp|O60814|H2B1K_HUMAN Histone H2B type 1-K OS=Homo sapiens OX=9606 GN=H2BC12 PE=1 SV=3;sp|P62807|H2B1C_HUMAN Histone H2B type 1-C/E/F/G/I OS=Homo sapiens OX=9606 GN=	A0A2R8Y619	105	A0A2R8Y619_K105	94.569	LLLPGELAK(1)HAVSEGTK	2	-0.92415
sp|A2PYH4|HFM1_HUMAN Probable ATP-dependent DNA helicase HFM1 OS=Homo sapiens OX=9606 GN=HFM1 PE=1 SV=2	A2PYH4	155	A2PYH4_K155	83.397	LVNFAEDK(1)GESTSVFR	2	3.7758
sp|A6NKC9|SH2D7_HUMAN SH2 domain-containing protein 7 OS=Homo sapiens OX=9606 GN=SH2D7 PE=4 SV=2	A6NKC9	189	A6NKC9_K189	59.908	SSPK(1)PQVSFLHAQK	2	-4.0143
sp|A8MXV4|NUD19_HUMAN Acyl-coenzyme A diphosphatase NUDT19 OS=Homo sapiens OX=9606 GN=NUDT19 PE=1 SV=1	A8MXV4	328	A8MXV4_K328	40.88	K(0.727)TEEIMK(0.274)EGK(1)QFHRIVTYHR	2	-1.35
sp|A8MXV4|NUD19_HUMAN Acyl-coenzyme A diphosphatase NUDT19 OS=Homo sapiens OX=9606 GN=NUDT19 PE=1 SV=1	A8MXV4	337	A8MXV4_K337	40.88	K(0.727)TEEIMK(0.274)EGK(1)QFHRIVTYHR	2	-1.35
sp|G3V211|CL079_HUMAN Uncharacterized protein encoded by LINC01619 OS=Homo sapiens OX=9606 GN=LINC01619 PE=5 SV=1	G3V211	58	G3V211_K58	44.683	EAGK(0.003)FGTHRGK(0.997)PMCFVRSLLR	3	3.7886
sp|O00370|LORF2_HUMAN LINE-1 retrotransposable element ORF2 protein OS=Homo sapiens OX=9606 PE=1 SV=1	O00370	1090	O00370_K1090	52.725	K(0.834)HMK(0.123)K(0.043)CSSSLAIR	2	-4.3198
sp|O00541|PESC_HUMAN Pescadillo homolog OS=Homo sapiens OX=9606 GN=PES1 PE=1 SV=1	O00541	550	O00541_K550	62.466	YLYQK(1)IMFGK(1)R	2	2.1295
sp|O00541|PESC_HUMAN Pescadillo homolog OS=Homo sapiens OX=9606 GN=PES1 PE=1 SV=1	O00541	555	O00541_K555	62.466	YLYQK(1)IMFGK(1)R	2	2.1295
sp|O00567|NOP56_HUMAN Nucleolar protein 56 OS=Homo sapiens OX=9606 GN=NOP56 PE=1 SV=4	O00567	533	O00567_K533	118.24	EELMSSDLEETAGSTSIPK(1)R	2	-0.73003
sp|O00567|NOP56_HUMAN Nucleolar protein 56 OS=Homo sapiens OX=9606 GN=NOP56 PE=1 SV=4	O00567	540	O00567_K540	201.76	STPK(1)EETVNDPEEAGHR	2	-0.12309
sp|P47813|IF1AX_HUMAN Eukaryotic translation initiation factor 1A, X-chromosomal OS=Homo sapiens OX=9606 GN=EIF1AX PE=1 SV=2;sp|O14602|IF1AY_HUMAN Eukaryotic translation initiation factor 1A, Y-chromosomal OS=Homo sapiens OX=9606 GN=EIF1AY PE=1 SV=4	P47813	3	P47813_K3	62.924	PK(1)NK(1)GK(1)GGK(1)NR	2	0.31961
sp|P47813|IF1AX_HUMAN Eukaryotic translation initiation factor 1A, X-chromosomal OS=Homo sapiens OX=9606 GN=EIF1AX PE=1 SV=2;sp|O14602|IF1AY_HUMAN Eukaryotic translation initiation factor 1A, Y-chromosomal OS=Homo sapiens OX=9606 GN=EIF1AY PE=1 SV=4	P47813	5	P47813_K5	62.924	PK(1)NK(1)GK(1)GGK(1)NR	2	0.31961
sp|P47813|IF1AX_HUMAN Eukaryotic translation initiation factor 1A, X-chromosomal OS=Homo sapiens OX=9606 GN=EIF1AX PE=1 SV=2;sp|O14602|IF1AY_HUMAN Eukaryotic translation initiation factor 1A, Y-chromosomal OS=Homo sapiens OX=9606 GN=EIF1AY PE=1 SV=4	P47813	7	P47813_K7	62.924	PK(1)NK(1)GK(1)GGK(1)NR	2	0.31961
sp|P47813|IF1AX_HUMAN Eukaryotic translation initiation factor 1A, X-chromosomal OS=Homo sapiens OX=9606 GN=EIF1AX PE=1 SV=2;sp|O14602|IF1AY_HUMAN Eukaryotic translation initiation factor 1A, Y-chromosomal OS=Homo sapiens OX=9606 GN=EIF1AY PE=1 SV=4	P47813	10	P47813_K10	62.924	PK(1)NK(1)GK(1)GGK(1)NR	2	0.31961
sp|O15417|TNC18_HUMAN Trinucleotide repeat-containing gene 18 protein OS=Homo sapiens OX=9606 GN=TNRC18 PE=1 SV=3	O15417	1461	O15417_K1461	55.209	K(1)K(1)EERMYAMK(1)SSLEDMDALELDFR	4	3.4337
sp|O15417|TNC18_HUMAN Trinucleotide repeat-containing gene 18 protein OS=Homo sapiens OX=9606 GN=TNRC18 PE=1 SV=3	O15417	1462	O15417_K1462	55.209	K(1)K(1)EERMYAMK(1)SSLEDMDALELDFR	4	3.4337
sp|O15417|TNC18_HUMAN Trinucleotide repeat-containing gene 18 protein OS=Homo sapiens OX=9606 GN=TNRC18 PE=1 SV=3	O15417	1470	O15417_K1470	55.209	K(1)K(1)EERMYAMK(1)SSLEDMDALELDFR	4	3.4337
sp|O15446|RPA34_HUMAN DNA-directed RNA polymerase I subunit RPA34 OS=Homo sapiens OX=9606 GN=POLR1G PE=1 SV=1	O15446	251	O15446_K251	63.728	EPEAAGPVGTEPTVETLEPLGVLFPSTTK(1)K	3	1.1514
sp|O43143|DHX15_HUMAN ATP-dependent RNA helicase DHX15 OS=Homo sapiens OX=9606 GN=DHX15 PE=1 SV=2	O43143	17	O43143_K17	81.647	LDLGEDYPSGK(1)K(1)R	2	0.63996
sp|O43143|DHX15_HUMAN ATP-dependent RNA helicase DHX15 OS=Homo sapiens OX=9606 GN=DHX15 PE=1 SV=2	O43143	18	O43143_K18	81.647	LDLGEDYPSGK(1)K(1)R	2	0.63996
sp|O43172|PRP4_HUMAN U4/U6 small nuclear ribonucleoprotein Prp4 OS=Homo sapiens OX=9606 GN=PRPF4 PE=1 SV=2	O43172	149	O43172_K149	45.022	TK(1)K(1)DDEK(1)SK(1)K(1)SK	2	1.7574
sp|O43172|PRP4_HUMAN U4/U6 small nuclear ribonucleoprotein Prp4 OS=Homo sapiens OX=9606 GN=PRPF4 PE=1 SV=2	O43172	150	O43172_K150	45.022	TK(1)K(1)DDEK(1)SK(1)K(1)SK	2	1.7574
sp|O43172|PRP4_HUMAN U4/U6 small nuclear ribonucleoprotein Prp4 OS=Homo sapiens OX=9606 GN=PRPF4 PE=1 SV=2	O43172	154	O43172_K154	45.022	TK(1)K(1)DDEK(1)SK(1)K(1)SK	2	1.7574
sp|O43172|PRP4_HUMAN U4/U6 small nuclear ribonucleoprotein Prp4 OS=Homo sapiens OX=9606 GN=PRPF4 PE=1 SV=2	O43172	156	O43172_K156	45.022	TK(1)K(1)DDEK(1)SK(1)K(1)SK	2	1.7574
sp|O43172|PRP4_HUMAN U4/U6 small nuclear ribonucleoprotein Prp4 OS=Homo sapiens OX=9606 GN=PRPF4 PE=1 SV=2	O43172	157	O43172_K157	45.022	TK(1)K(1)DDEK(1)SK(1)K(1)SK	2	1.7574
sp|O43345|ZN208_HUMAN Zinc finger protein 208 OS=Homo sapiens OX=9606 GN=ZNF208 PE=2 SV=2	O43345	784	O43345_K784	44.998	CEECGK(0.999)AFNRSAILIK(0.001)HK(0.001)R	3	2.1659
sp|O43665|RGS10_HUMAN Regulator of G-protein signaling 10 OS=Homo sapiens OX=9606 GN=RGS10 PE=1 SV=3	O43665	148	O43665_K148	56.514	YDSYSRFLK(0.743)SDLFLK(0.129)HK(0.129)R	3	-1.6525
sp|O60610|DIAP1_HUMAN Protein diaphanous homolog 1 OS=Homo sapiens OX=9606 GN=DIAPH1 PE=1 SV=2	O60610	58	O60610_K58	58.32	FTSMRIK(1)K(1)EK(1)EK(1)PNSAHR	2	-0.40389
sp|O60610|DIAP1_HUMAN Protein diaphanous homolog 1 OS=Homo sapiens OX=9606 GN=DIAPH1 PE=1 SV=2	O60610	59	O60610_K59	58.32	FTSMRIK(1)K(1)EK(1)EK(1)PNSAHR	2	-0.40389
sp|O60610|DIAP1_HUMAN Protein diaphanous homolog 1 OS=Homo sapiens OX=9606 GN=DIAPH1 PE=1 SV=2	O60610	61	O60610_K61	58.32	FTSMRIK(1)K(1)EK(1)EK(1)PNSAHR	2	-0.40389
sp|O60610|DIAP1_HUMAN Protein diaphanous homolog 1 OS=Homo sapiens OX=9606 GN=DIAPH1 PE=1 SV=2	O60610	63	O60610_K63	58.32	FTSMRIK(1)K(1)EK(1)EK(1)PNSAHR	2	-0.40389
sp|O60814|H2B1K_HUMAN Histone H2B type 1-K OS=Homo sapiens OX=9606 GN=H2BC12 PE=1 SV=3;sp|P62807|H2B1C_HUMAN Histone H2B type 1-C/E/F/G/I OS=Homo sapiens OX=9606 GN=H2BC10 PE=1 SV=4;sp|P57053|H2BFS_HUMAN Histone H2B type F-S OS=Homo sapiens OX=9606 GN=H2BC	O60814	21	O60814_K21	108.98	SAPAPK(1)K(1)GSK(1)K(1)AVTK(1)AQK(1)K	2	-1.1843
sp|O60814|H2B1K_HUMAN Histone H2B type 1-K OS=Homo sapiens OX=9606 GN=H2BC12 PE=1 SV=3;sp|P62807|H2B1C_HUMAN Histone H2B type 1-C/E/F/G/I OS=Homo sapiens OX=9606 GN=H2BC10 PE=1 SV=4;sp|P57053|H2BFS_HUMAN Histone H2B type F-S OS=Homo sapiens OX=9606 GN=H2BC	O60814	24	O60814_K24	108.98	SAPAPK(1)K(1)GSK(1)K(1)AVTK(1)AQK(1)K	2	-1.1843
sp|O60814|H2B1K_HUMAN Histone H2B type 1-K OS=Homo sapiens OX=9606 GN=H2BC12 PE=1 SV=3;sp|P62807|H2B1C_HUMAN Histone H2B type 1-C/E/F/G/I OS=Homo sapiens OX=9606 GN=H2BC10 PE=1 SV=4;sp|P57053|H2BFS_HUMAN Histone H2B type F-S OS=Homo sapiens OX=9606 GN=H2BC	O60814	25	O60814_K25	108.98	AVTK(1)AQK(1)K(1)DGK	2	0.62135
sp|O60814|H2B1K_HUMAN Histone H2B type 1-K OS=Homo sapiens OX=9606 GN=H2BC12 PE=1 SV=3;sp|P62807|H2B1C_HUMAN Histone H2B type 1-C/E/F/G/I OS=Homo sapiens OX=9606 GN=H2BC10 PE=1 SV=4;sp|P57053|H2BFS_HUMAN Histone H2B type F-S OS=Homo sapiens OX=9606 GN=H2BC	O60814	17	O60814_K17	87.669	SAPAPK(1)K(1)GSK(1)K(1)AVTK(1)AQK(1)K	2	-1.1843
sp|O60814|H2B1K_HUMAN Histone H2B type 1-K OS=Homo sapiens OX=9606 GN=H2BC12 PE=1 SV=3;sp|P62807|H2B1C_HUMAN Histone H2B type 1-C/E/F/G/I OS=Homo sapiens OX=9606 GN=H2BC10 PE=1 SV=4;sp|P57053|H2BFS_HUMAN Histone H2B type F-S OS=Homo sapiens OX=9606 GN=H2BC	O60814	6	O60814_K6	77.192	PEPAK(1)SAPAPK(1)K	2	0.80513
sp|O60814|H2B1K_HUMAN Histone H2B type 1-K OS=Homo sapiens OX=9606 GN=H2BC12 PE=1 SV=3;sp|P62807|H2B1C_HUMAN Histone H2B type 1-C/E/F/G/I OS=Homo sapiens OX=9606 GN=H2BC10 PE=1 SV=4;sp|P57053|H2BFS_HUMAN Histone H2B type F-S OS=Homo sapiens OX=9606 GN=H2BC	O60814	12	O60814_K12	87.669	SAPAPK(1)K(1)GSK(1)K(1)AVTK(1)AQK(1)K	2	-1.1843
sp|O60814|H2B1K_HUMAN Histone H2B type 1-K OS=Homo sapiens OX=9606 GN=H2BC12 PE=1 SV=3;sp|P62807|H2B1C_HUMAN Histone H2B type 1-C/E/F/G/I OS=Homo sapiens OX=9606 GN=H2BC10 PE=1 SV=4;sp|P57053|H2BFS_HUMAN Histone H2B type F-S OS=Homo sapiens OX=9606 GN=H2BC	O60814	13	O60814_K13	87.669	SAPAPK(1)K(1)GSK(1)K(1)AVTK(1)AQK(1)K	2	-1.1843
sp|O60814|H2B1K_HUMAN Histone H2B type 1-K OS=Homo sapiens OX=9606 GN=H2BC12 PE=1 SV=3;sp|P62807|H2B1C_HUMAN Histone H2B type 1-C/E/F/G/I OS=Homo sapiens OX=9606 GN=H2BC10 PE=1 SV=4;sp|P57053|H2BFS_HUMAN Histone H2B type F-S OS=Homo sapiens OX=9606 GN=H2BC	O60814	58	O60814_K58	81.553	QVHPDTGISSK(1)AMGIMNSFVNDIFER	3	-1.423
sp|O60814|H2B1K_HUMAN Histone H2B type 1-K OS=Homo sapiens OX=9606 GN=H2BC12 PE=1 SV=3;sp|P62807|H2B1C_HUMAN Histone H2B type 1-C/E/F/G/I OS=Homo sapiens OX=9606 GN=H2BC10 PE=1 SV=4;sp|P57053|H2BFS_HUMAN Histone H2B type F-S OS=Homo sapiens OX=9606 GN=H2BC	O60814	16	O60814_K16	87.669	SAPAPK(1)K(1)GSK(1)K(1)AVTK(1)AQK(1)K	2	-1.1843
sp|O60814|H2B1K_HUMAN Histone H2B type 1-K OS=Homo sapiens OX=9606 GN=H2BC12 PE=1 SV=3;sp|P62807|H2B1C_HUMAN Histone H2B type 1-C/E/F/G/I OS=Homo sapiens OX=9606 GN=H2BC10 PE=1 SV=4;sp|P57053|H2BFS_HUMAN Histone H2B type F-S OS=Homo sapiens OX=9606 GN=H2BC	O60814	47	O60814_K47	138.76	VLK(1)QVHPDTGISSK	2	1.1663
sp|O60832|DKC1_HUMAN H/ACA ribonucleoprotein complex subunit DKC1 OS=Homo sapiens OX=9606 GN=DKC1 PE=1 SV=3	O60832	11	O60832_K11	113.71	ADAEVIILPK(1)K	1	0.3276
sp|O60832|DKC1_HUMAN H/ACA ribonucleoprotein complex subunit DKC1 OS=Homo sapiens OX=9606 GN=DKC1 PE=1 SV=3	O60832	12	O60832_K12	70.569	ADAEVIILPK(0.406)K(0.653)HK(0.982)K(0.973)K(0.994)K(0.993)ER	3	2.1193
sp|O60832|DKC1_HUMAN H/ACA ribonucleoprotein complex subunit DKC1 OS=Homo sapiens OX=9606 GN=DKC1 PE=1 SV=3	O60832	14	O60832_K14	70.569	ADAEVIILPK(0.406)K(0.653)HK(0.982)K(0.973)K(0.994)K(0.993)ER	3	2.1193
sp|O60832|DKC1_HUMAN H/ACA ribonucleoprotein complex subunit DKC1 OS=Homo sapiens OX=9606 GN=DKC1 PE=1 SV=3	O60832	15	O60832_K15	70.569	ADAEVIILPK(0.406)K(0.653)HK(0.982)K(0.973)K(0.994)K(0.993)ER	3	2.1193
sp|O60832|DKC1_HUMAN H/ACA ribonucleoprotein complex subunit DKC1 OS=Homo sapiens OX=9606 GN=DKC1 PE=1 SV=3	O60832	16	O60832_K16	70.569	ADAEVIILPK(0.406)K(0.653)HK(0.982)K(0.973)K(0.994)K(0.993)ER	3	2.1193
sp|O60832|DKC1_HUMAN H/ACA ribonucleoprotein complex subunit DKC1 OS=Homo sapiens OX=9606 GN=DKC1 PE=1 SV=3	O60832	17	O60832_K17	70.569	ADAEVIILPK(0.406)K(0.653)HK(0.982)K(0.973)K(0.994)K(0.993)ER	3	2.1193
sp|O60832|DKC1_HUMAN H/ACA ribonucleoprotein complex subunit DKC1 OS=Homo sapiens OX=9606 GN=DKC1 PE=1 SV=3	O60832	443	O60832_K443	88.561	APQVVAEAAK(1)TAK(1)R	2	0.89394
sp|O60832|DKC1_HUMAN H/ACA ribonucleoprotein complex subunit DKC1 OS=Homo sapiens OX=9606 GN=DKC1 PE=1 SV=3	O60832	446	O60832_K446	88.561	APQVVAEAAK(1)TAK(1)R	2	0.89394
sp|O60885|BRD4_HUMAN Bromodomain-containing protein 4 OS=Homo sapiens OX=9606 GN=BRD4 PE=1 SV=2	O60885	535	O60885_K535	48.112	AVHEQLAALSQPQQNK(1)PK(1)K(1)K	3	1.4187
sp|O60885|BRD4_HUMAN Bromodomain-containing protein 4 OS=Homo sapiens OX=9606 GN=BRD4 PE=1 SV=2	O60885	537	O60885_K537	48.112	AVHEQLAALSQPQQNK(1)PK(1)K(1)K	3	1.4187
sp|O60885|BRD4_HUMAN Bromodomain-containing protein 4 OS=Homo sapiens OX=9606 GN=BRD4 PE=1 SV=2	O60885	538	O60885_K538	48.112	AVHEQLAALSQPQQNK(1)PK(1)K(1)K	3	1.4187
sp|O60885|BRD4_HUMAN Bromodomain-containing protein 4 OS=Homo sapiens OX=9606 GN=BRD4 PE=1 SV=2	O60885	329	O60885_K329	80.755	ESSRPVK(1)PPK(1)K	2	-0.15064
sp|O60885|BRD4_HUMAN Bromodomain-containing protein 4 OS=Homo sapiens OX=9606 GN=BRD4 PE=1 SV=2	O60885	332	O60885_K332	80.755	ESSRPVK(1)PPK(1)K	2	-0.15064
sp|O75022|LIRB3_HUMAN Leukocyte immunoglobulin-like receptor subfamily B member 3 OS=Homo sapiens OX=9606 GN=LILRB3 PE=1 SV=3	O75022	479	O75022_K479	52.495	HSKHRTSDQRK(1)TDFQR	2	-1.7008
sp|O75190|DNJB6_HUMAN DnaJ homolog subfamily B member 6 OS=Homo sapiens OX=9606 GN=DNAJB6 PE=1 SV=2	O75190	302	O75190_K302	75.533	APGPWDPLASAAGLK(1)EGGK(1)R	2	-0.81916
sp|O75190|DNJB6_HUMAN DnaJ homolog subfamily B member 6 OS=Homo sapiens OX=9606 GN=DNAJB6 PE=1 SV=2	O75190	306	O75190_K306	75.533	APGPWDPLASAAGLK(1)EGGK(1)R	2	-0.81916
sp|O75475|PSIP1_HUMAN PC4 and SFRS1-interacting protein OS=Homo sapiens OX=9606 GN=PSIP1 PE=1 SV=1	O75475	229	O75475_K229	108.96	QPK(0.997)K(0.997)QPK(0.943)K(0.062)DEEGQKEEDKPR	3	-0.59386
sp|O75475|PSIP1_HUMAN PC4 and SFRS1-interacting protein OS=Homo sapiens OX=9606 GN=PSIP1 PE=1 SV=1	O75475	232	O75475_K232	108.96	QPK(0.997)K(0.997)QPK(0.943)K(0.062)DEEGQKEEDKPR	3	-0.59386
sp|O75475|PSIP1_HUMAN PC4 and SFRS1-interacting protein OS=Homo sapiens OX=9606 GN=PSIP1 PE=1 SV=1	O75475	56	O75475_K56	69.133	LPIFFFGTHETAFLGPK(1)DIFPYSENK	3	0.028636
sp|O75475|PSIP1_HUMAN PC4 and SFRS1-interacting protein OS=Homo sapiens OX=9606 GN=PSIP1 PE=1 SV=1	O75475	228	O75475_K228	108.96	QPK(0.997)K(0.997)QPK(0.943)K(0.062)DEEGQKEEDKPR	3	-0.59386
sp|Q9BU76|MMTA2_HUMAN Multiple myeloma tumor-associated protein 2 OS=Homo sapiens OX=9606 GN=MMTAG2 PE=1 SV=1;sp|O75592|MYCB2_HUMAN E3 ubiquitin-protein ligase MYCBP2 OS=Homo sapiens OX=9606 GN=MYCBP2 PE=1 SV=4	Q9BU76	184	Q9BU76_K184	72.325	K(1)SK(0.027)K(0.806)EK(0.138)K(0.023)K(0.006)K	3	3.5658
sp|Q9BU76|MMTA2_HUMAN Multiple myeloma tumor-associated protein 2 OS=Homo sapiens OX=9606 GN=MMTAG2 PE=1 SV=1;sp|O75592|MYCB2_HUMAN E3 ubiquitin-protein ligase MYCBP2 OS=Homo sapiens OX=9606 GN=MYCBP2 PE=1 SV=4	Q9BU76	187	Q9BU76_K187	72.325	K(1)SK(0.027)K(0.806)EK(0.138)K(0.023)K(0.006)K	3	3.5658
sp|O75596|CLC3A_HUMAN C-type lectin domain family 3 member A OS=Homo sapiens OX=9606 GN=CLEC3A PE=1 SV=1	O75596	28	O75596_K28	45.829	LK(1)ARK(1)HSK(1)RRVR	4	2.5878
sp|O75596|CLC3A_HUMAN C-type lectin domain family 3 member A OS=Homo sapiens OX=9606 GN=CLEC3A PE=1 SV=1	O75596	31	O75596_K31	45.829	LK(1)ARK(1)HSK(1)RRVR	4	2.5878
sp|O75596|CLC3A_HUMAN C-type lectin domain family 3 member A OS=Homo sapiens OX=9606 GN=CLEC3A PE=1 SV=1	O75596	34	O75596_K34	45.829	LK(1)ARK(1)HSK(1)RRVR	4	2.5878
sp|O75940|SPF30_HUMAN Survival of motor neuron-related-splicing factor 30 OS=Homo sapiens OX=9606 GN=SMNDC1 PE=1 SV=1	O75940	165	O75940_K165	130.15	IK(1)ELEQEREDQK	2	0.62269
sp|O76021|RL1D1_HUMAN Ribosomal L1 domain-containing protein 1 OS=Homo sapiens OX=9606 GN=RSL1D1 PE=1 SV=3	O76021	395	O76021_K395	117.14	SPAK(1)SPNPSTPR	2	0.30002
sp|O76021|RL1D1_HUMAN Ribosomal L1 domain-containing protein 1 OS=Homo sapiens OX=9606 GN=RSL1D1 PE=1 SV=3	O76021	385	O76021_K385	64.945	VEIQK(1)HATGK	3	-0.16146
sp|O95347|SMC2_HUMAN Structural maintenance of chromosomes protein 2 OS=Homo sapiens OX=9606 GN=SMC2 PE=1 SV=2	O95347	332	O95347_K332	54.292	RK(0.999)ELEK(0.001)NMVEDSK(0.02)TLAAK(0.98)EK	3	3.2523
sp|O95347|SMC2_HUMAN Structural maintenance of chromosomes protein 2 OS=Homo sapiens OX=9606 GN=SMC2 PE=1 SV=2	O95347	348	O95347_K348	54.292	RK(0.999)ELEK(0.001)NMVEDSK(0.02)TLAAK(0.98)EK	3	3.2523
sp|O95478|NSA2_HUMAN Ribosome biogenesis protein NSA2 homolog OS=Homo sapiens OX=9606 GN=NSA2 PE=1 SV=1	O95478	143	O95478_K143	62.546	K(0.5)K(0.5)AWK(1)RMVTK	2	-4.252
sp|O95478|NSA2_HUMAN Ribosome biogenesis protein NSA2 homolog OS=Homo sapiens OX=9606 GN=NSA2 PE=1 SV=1	O95478	144	O95478_K144	62.546	K(0.5)K(0.5)AWK(1)RMVTK	2	-4.252
sp|O95478|NSA2_HUMAN Ribosome biogenesis protein NSA2 homolog OS=Homo sapiens OX=9606 GN=NSA2 PE=1 SV=1	O95478	147	O95478_K147	62.546	K(0.5)K(0.5)AWK(1)RMVTK	2	-4.252
sp|O95573|ACSL3_HUMAN Fatty acid CoA ligase Acsl3 OS=Homo sapiens OX=9606 GN=ACSL3 PE=1 SV=3	O95573	56	O95573_K56	62.107	IK(1)AK(1)PVNSK	2	-1.3852
sp|O95573|ACSL3_HUMAN Fatty acid CoA ligase Acsl3 OS=Homo sapiens OX=9606 GN=ACSL3 PE=1 SV=3	O95573	58	O95573_K58	62.107	IK(1)AK(1)PVNSK	2	-1.3852
sp|Q93077|H2A1C_HUMAN Histone H2A type 1-C OS=Homo sapiens OX=9606 GN=H2AC6 PE=1 SV=3;sp|Q7L7L0|H2A3_HUMAN Histone H2A type 3 OS=Homo sapiens OX=9606 GN=H2AC25 PE=1 SV=3;sp|P04908|H2A1B_HUMAN Histone H2A type 1-B/E OS=Homo sapiens OX=9606 GN=H2AC8 PE=1 SV=	Q93077	119	Q93077_K119	68.525	VTIAQGGVLPNIQAVLLPK(1)K	3	0.40191
sp|P05114|HMGN1_HUMAN Non-histone chromosomal protein HMG-14 OS=Homo sapiens OX=9606 GN=HMGN1 PE=1 SV=3	P05114	5	P05114_K5	92.112	PK(1)RK(1)VSSAEGAAK(1)EEPK	2	-0.40291
sp|P05114|HMGN1_HUMAN Non-histone chromosomal protein HMG-14 OS=Homo sapiens OX=9606 GN=HMGN1 PE=1 SV=3	P05114	14	P05114_K14	148.56	VSSAEGAAK(1)EEPK(1)R	2	-1.0667
sp|P05114|HMGN1_HUMAN Non-histone chromosomal protein HMG-14 OS=Homo sapiens OX=9606 GN=HMGN1 PE=1 SV=3	P05114	18	P05114_K18	79.201	VSSAEGAAK(1)EEPK(1)R	2	-1.0667
sp|P05114|HMGN1_HUMAN Non-histone chromosomal protein HMG-14 OS=Homo sapiens OX=9606 GN=HMGN1 PE=1 SV=3	P05114	27	P05114_K27	65.801	LSAK(1)PPAK(1)VEAK	2	0.03838
sp|P05114|HMGN1_HUMAN Non-histone chromosomal protein HMG-14 OS=Homo sapiens OX=9606 GN=HMGN1 PE=1 SV=3	P05114	31	P05114_K31	113.5	PPAK(1)VEAK	1	-0.38086
sp|P05114|HMGN1_HUMAN Non-histone chromosomal protein HMG-14 OS=Homo sapiens OX=9606 GN=HMGN1 PE=1 SV=3	P05114	35	P05114_K35	66.023	VEAK(1)PK(1)K(1)AAAK	2	1.5562
sp|P05114|HMGN1_HUMAN Non-histone chromosomal protein HMG-14 OS=Homo sapiens OX=9606 GN=HMGN1 PE=1 SV=3	P05114	37	P05114_K37	105.82	VEAK(1)PK(1)K(1)AAAK	2	1.5562
sp|P05114|HMGN1_HUMAN Non-histone chromosomal protein HMG-14 OS=Homo sapiens OX=9606 GN=HMGN1 PE=1 SV=3	P05114	38	P05114_K38	105.82	VEAK(1)PK(1)K(1)AAAK	2	1.5562
sp|P05114|HMGN1_HUMAN Non-histone chromosomal protein HMG-14 OS=Homo sapiens OX=9606 GN=HMGN1 PE=1 SV=3	P05114	42	P05114_K42	79.589	VEAK(0.06)PK(0.955)K(0.985)AAAK(1)DK	3	-0.31801
sp|P05114|HMGN1_HUMAN Non-histone chromosomal protein HMG-14 OS=Homo sapiens OX=9606 GN=HMGN1 PE=1 SV=3	P05114	3	P05114_K3	92.112	PK(1)RK(1)VSSAEGAAK(1)EEPK	2	-0.40291
sp|P05204|HMGN2_HUMAN Non-histone chromosomal protein HMG-17 OS=Homo sapiens OX=9606 GN=HMGN2 PE=1 SV=3;sp|O00479|HMGN4_HUMAN High mobility group nucleosome-binding domain-containing protein 4 OS=Homo sapiens OX=9606 GN=HMGN4 PE=1 SV=3	P05204	16	P05204_K16	99.568	AK(1)VK(1)DEPQR	2	0.59586
sp|P05204|HMGN2_HUMAN Non-histone chromosomal protein HMG-17 OS=Homo sapiens OX=9606 GN=HMGN2 PE=1 SV=3;sp|O00479|HMGN4_HUMAN High mobility group nucleosome-binding domain-containing protein 4 OS=Homo sapiens OX=9606 GN=HMGN4 PE=1 SV=3	P05204	18	P05204_K18	99.568	AK(1)VK(1)DEPQR	2	0.59586
sp|P05204|HMGN2_HUMAN Non-histone chromosomal protein HMG-17 OS=Homo sapiens OX=9606 GN=HMGN2 PE=1 SV=3	P05204	36	P05204_K36	107.17	PAPPK(1)PEPK(1)PK	2	0.79786
sp|P05204|HMGN2_HUMAN Non-histone chromosomal protein HMG-17 OS=Homo sapiens OX=9606 GN=HMGN2 PE=1 SV=3	P05204	40	P05204_K40	124.21	PAPPK(1)PEPK(1)PK	2	0.79786
sp|P05204|HMGN2_HUMAN Non-histone chromosomal protein HMG-17 OS=Homo sapiens OX=9606 GN=HMGN2 PE=1 SV=3	P05204	42	P05204_K42	81.128	PK(1)K(1)APAK(1)K(1)GEK	2	0.46794
sp|P05204|HMGN2_HUMAN Non-histone chromosomal protein HMG-17 OS=Homo sapiens OX=9606 GN=HMGN2 PE=1 SV=3	P05204	43	P05204_K43	81.128	PK(1)K(1)APAK(1)K(1)GEK	2	0.46794
sp|P05204|HMGN2_HUMAN Non-histone chromosomal protein HMG-17 OS=Homo sapiens OX=9606 GN=HMGN2 PE=1 SV=3	P05204	47	P05204_K47	81.128	PK(1)K(1)APAK(1)K(1)GEK	2	0.46794
sp|P05204|HMGN2_HUMAN Non-histone chromosomal protein HMG-17 OS=Homo sapiens OX=9606 GN=HMGN2 PE=1 SV=3	P05204	48	P05204_K48	81.128	PK(1)K(1)APAK(1)K(1)GEK	2	0.46794
sp|P05204|HMGN2_HUMAN Non-histone chromosomal protein HMG-17 OS=Homo sapiens OX=9606 GN=HMGN2 PE=1 SV=3	P05204	3	P05204_K3	85.28	PK(1)RK(1)AEGDAK(1)GDK	2	1.0351
sp|P05204|HMGN2_HUMAN Non-histone chromosomal protein HMG-17 OS=Homo sapiens OX=9606 GN=HMGN2 PE=1 SV=3	P05204	5	P05204_K5	85.28	PK(1)RK(1)AEGDAK(1)GDK	2	1.0351
sp|P05204|HMGN2_HUMAN Non-histone chromosomal protein HMG-17 OS=Homo sapiens OX=9606 GN=HMGN2 PE=1 SV=3	P05204	11	P05204_K11	85.28	PK(1)RK(1)AEGDAK(1)GDK	2	1.0351
sp|P05204|HMGN2_HUMAN Non-histone chromosomal protein HMG-17 OS=Homo sapiens OX=9606 GN=HMGN2 PE=1 SV=3	P05204	54	P05204_K54	57.149	VPK(1)GK(1)K(1)GK(1)ADAGK	2	0.1199
sp|P05204|HMGN2_HUMAN Non-histone chromosomal protein HMG-17 OS=Homo sapiens OX=9606 GN=HMGN2 PE=1 SV=3	P05204	56	P05204_K56	57.149	VPK(1)GK(1)K(1)GK(1)ADAGK	2	0.1199
sp|P05204|HMGN2_HUMAN Non-histone chromosomal protein HMG-17 OS=Homo sapiens OX=9606 GN=HMGN2 PE=1 SV=3	P05204	57	P05204_K57	57.149	VPK(1)GK(1)K(1)GK(1)ADAGK	2	0.1199
sp|P05204|HMGN2_HUMAN Non-histone chromosomal protein HMG-17 OS=Homo sapiens OX=9606 GN=HMGN2 PE=1 SV=3	P05204	59	P05204_K59	57.149	VPK(1)GK(1)K(1)GK(1)ADAGK	2	0.1199
sp|P06748|NPM_HUMAN Nucleophosmin OS=Homo sapiens OX=9606 GN=NPM1 PE=1 SV=2	P06748	193	P06748_K193	106.88	APVK(1)K(1)SIR	2	0.23009
sp|P06748|NPM_HUMAN Nucleophosmin OS=Homo sapiens OX=9606 GN=NPM1 PE=1 SV=2	P06748	194	P06748_K194	106.88	APVK(1)K(1)SIR	2	0.23009
sp|P06748|NPM_HUMAN Nucleophosmin OS=Homo sapiens OX=9606 GN=NPM1 PE=1 SV=2	P06748	229	P06748_K229	95.751	GQESFK(1)K(1)QEK(1)TPK(1)TPK	2	-1.2872
sp|P06748|NPM_HUMAN Nucleophosmin OS=Homo sapiens OX=9606 GN=NPM1 PE=1 SV=2	P06748	230	P06748_K230	95.751	GQESFK(1)K(1)QEK(1)TPK(1)TPK	2	-1.2872
sp|P06748|NPM_HUMAN Nucleophosmin OS=Homo sapiens OX=9606 GN=NPM1 PE=1 SV=2	P06748	233	P06748_K233	105.95	GQESFK(1)K(1)QEK(1)TPK(1)TPK	2	-1.2872
sp|P06748|NPM_HUMAN Nucleophosmin OS=Homo sapiens OX=9606 GN=NPM1 PE=1 SV=2	P06748	236	P06748_K236	105.95	GQESFK(1)K(1)QEK(1)TPK(1)TPK	2	-1.2872
sp|P07197|NFM_HUMAN Neurofilament medium polypeptide OS=Homo sapiens OX=9606 GN=NEFM PE=1 SV=3	P07197	710	P07197_K710	42.118	EVK(1)EAPK(1)EEK(0.996)VEK(0.95)K(0.95)EEK(0.104)PK	3	-3.9812
sp|P07197|NFM_HUMAN Neurofilament medium polypeptide OS=Homo sapiens OX=9606 GN=NEFM PE=1 SV=3	P07197	714	P07197_K714	42.118	EVK(1)EAPK(1)EEK(0.996)VEK(0.95)K(0.95)EEK(0.104)PK	3	-3.9812
sp|P07197|NFM_HUMAN Neurofilament medium polypeptide OS=Homo sapiens OX=9606 GN=NEFM PE=1 SV=3	P07197	717	P07197_K717	42.118	EVK(1)EAPK(1)EEK(0.996)VEK(0.95)K(0.95)EEK(0.104)PK	3	-3.9812
sp|P07197|NFM_HUMAN Neurofilament medium polypeptide OS=Homo sapiens OX=9606 GN=NEFM PE=1 SV=3	P07197	720	P07197_K720	42.118	EVK(1)EAPK(1)EEK(0.996)VEK(0.95)K(0.95)EEK(0.104)PK	3	-3.9812
sp|P07197|NFM_HUMAN Neurofilament medium polypeptide OS=Homo sapiens OX=9606 GN=NEFM PE=1 SV=3	P07197	721	P07197_K721	42.118	EVK(1)EAPK(1)EEK(0.996)VEK(0.95)K(0.95)EEK(0.104)PK	3	-3.9812
sp|P07305|H10_HUMAN Histone H1.0 OS=Homo sapiens OX=9606 GN=H1-0 PE=1 SV=3	P07305	14	P07305_K14	96.113	TENSTSAPAAK(0.014)PK(0.986)R	2	2.1909
sp|P08572|CO4A2_HUMAN Collagen alpha-2(IV) chain OS=Homo sapiens OX=9606 GN=COL4A2 PE=1 SV=4	P08572	1694	P08572_K1694	45.957	YSFWLTTIPEQSFQGSPSADTLK(1)AGLIR	3	0.41889
sp|P09429|HMGB1_HUMAN High mobility group protein B1 OS=Homo sapiens OX=9606 GN=HMGB1 PE=1 SV=3;sp|P23497|SP100_HUMAN Nuclear autoantigen Sp-100 OS=Homo sapiens OX=9606 GN=SP100 PE=1 SV=3	P09429	76	P09429_K76	85.533	EMK(1)TYIPPK(1)GETK	2	0.66387
sp|P09429|HMGB1_HUMAN High mobility group protein B1 OS=Homo sapiens OX=9606 GN=HMGB1 PE=1 SV=3;sp|P23497|SP100_HUMAN Nuclear autoantigen Sp-100 OS=Homo sapiens OX=9606 GN=SP100 PE=1 SV=3	P09429	82	P09429_K82	79.346	EMK(1)TYIPPK(1)GETK	2	0.66387
sp|P09429|HMGB1_HUMAN High mobility group protein B1 OS=Homo sapiens OX=9606 GN=HMGB1 PE=1 SV=3;sp|B2RPK0|HGB1A_HUMAN Putative high mobility group protein B1-like 1 OS=Homo sapiens OX=9606 GN=HMGB1P1 PE=5 SV=1;sp|P23497|SP100_HUMAN Nuclear autoantigen Sp-1	P09429	65	P09429_K65	76.228	GKFEDMAK(1)ADK	2	0.39952
sp|P09429|HMGB1_HUMAN High mobility group protein B1 OS=Homo sapiens OX=9606 GN=HMGB1 PE=1 SV=3;sp|B2RPK0|HGB1A_HUMAN Putative high mobility group protein B1-like 1 OS=Homo sapiens OX=9606 GN=HMGB1P1 PE=5 SV=1	P09429	7	P09429_K7	105.14	GKGDPK(0.893)K(0.107)PR	2	0.061174
sp|P0C221|CC175_HUMAN Coiled-coil domain-containing protein 175 OS=Homo sapiens OX=9606 GN=CCDC175 PE=4 SV=2	P0C221	365	P0C221_K365	50.194	MK(1)TLARQYK	3	2.4195
sp|P10412|H14_HUMAN Histone H1.4 OS=Homo sapiens OX=9606 GN=H1-4 PE=1 SV=2	P10412	169	P10412_K169	79.659	K(1)AK(1)SPK(1)K	1	0.44376
sp|P10412|H14_HUMAN Histone H1.4 OS=Homo sapiens OX=9606 GN=H1-4 PE=1 SV=2	P10412	171	P10412_K171	79.659	K(1)AK(1)SPK(1)K	1	0.44376
sp|P10412|H14_HUMAN Histone H1.4 OS=Homo sapiens OX=9606 GN=H1-4 PE=1 SV=2	P10412	174	P10412_K174	79.659	K(1)AK(1)SPK(1)K	1	0.44376
sp|P10412|H14_HUMAN Histone H1.4 OS=Homo sapiens OX=9606 GN=H1-4 PE=1 SV=2	P10412	175	P10412_K175	59.585	PAAAAGAK(0.05)K(0.946)AK(0.348)SPK(0.801)K(0.775)AK(0.081)AAK	2	0.40911
sp|P10412|H14_HUMAN Histone H1.4 OS=Homo sapiens OX=9606 GN=H1-4 PE=1 SV=2	P10412	168	P10412_K168	99.53	KPAAAAGAK(1)K	2	-0.83367
sp|P11387|TOP1_HUMAN DNA topoisomerase 1 OS=Homo sapiens OX=9606 GN=TOP1 PE=1 SV=2	P11387	181	P11387_K181	50.46	DK(0.794)DK(0.102)K(0.102)VPEPDNK(0.001)KK	3	0.4394
sp|P12036|NFH_HUMAN Neurofilament heavy polypeptide OS=Homo sapiens OX=9606 GN=NEFH PE=1 SV=4	P12036	806	P12036_K806	61.815	AK(1)SPLK(1)EDAK(1)APEK	2	-0.58438
sp|P12036|NFH_HUMAN Neurofilament heavy polypeptide OS=Homo sapiens OX=9606 GN=NEFH PE=1 SV=4	P12036	810	P12036_K810	61.815	AK(1)SPLK(1)EDAK(1)APEK	2	-0.58438
sp|P12036|NFH_HUMAN Neurofilament heavy polypeptide OS=Homo sapiens OX=9606 GN=NEFH PE=1 SV=4	P12036	814	P12036_K814	61.815	AK(1)SPLK(1)EDAK(1)APEK	2	-0.58438
sp|P12757|SKIL_HUMAN Ski-like protein OS=Homo sapiens OX=9606 GN=SKIL PE=1 SV=2	P12757	352	P12757_K352	57.578	IILEEMK(0.998)EK(0.002)FSMRSGKRNQSK	3	4.0249
sp|P16401|H15_HUMAN Histone H1.5 OS=Homo sapiens OX=9606 GN=H1-5 PE=1 SV=3	P16401	37	P16401_K37	80.834	RK(1)ATGPPVSELITK	2	1.3031
sp|P16403|H12_HUMAN Histone H1.2 OS=Homo sapiens OX=9606 GN=H1-2 PE=1 SV=2	P16403	168	P16403_K168	147.62	KPAAATVTK(1)K	2	0.23685
sp|P17029|ZKSC1_HUMAN Zinc finger protein with KRAB and SCAN domains 1 OS=Homo sapiens OX=9606 GN=ZKSCAN1 PE=1 SV=3	P17029	310	P17029_K310	56.122	DQEGK(0.999)TGERQQK(0.848)NPEEK(0.153)TR	2	-4.3541
sp|P17029|ZKSC1_HUMAN Zinc finger protein with KRAB and SCAN domains 1 OS=Homo sapiens OX=9606 GN=ZKSCAN1 PE=1 SV=3	P17029	317	P17029_K317	56.122	DQEGK(0.998)TGERQQK(0.895)NPEEK(0.108)TR	2	-4.3541
sp|P17096|HMGA1_HUMAN High mobility group protein HMG-I/HMG-Y OS=Homo sapiens OX=9606 GN=HMGA1 PE=1 SV=3	P17096	55	P17096_K55	134.25	EPSEVPTPK(1)RPR	1	0.43495
sp|P17096|HMGA1_HUMAN High mobility group protein HMG-I/HMG-Y OS=Homo sapiens OX=9606 GN=HMGA1 PE=1 SV=3	P17096	62	P17096_K62	83.894	GRPK(1)GSK(1)NK(1)GAAK(1)TR	2	0.15705
sp|P17096|HMGA1_HUMAN High mobility group protein HMG-I/HMG-Y OS=Homo sapiens OX=9606 GN=HMGA1 PE=1 SV=3	P17096	65	P17096_K65	83.894	GRPK(1)GSK(1)NK(1)GAAK(1)TR	2	0.15705
sp|P17096|HMGA1_HUMAN High mobility group protein HMG-I/HMG-Y OS=Homo sapiens OX=9606 GN=HMGA1 PE=1 SV=3	P17096	67	P17096_K67	83.894	GRPK(1)GSK(1)NK(1)GAAK(1)TR	2	0.15705
sp|P17096|HMGA1_HUMAN High mobility group protein HMG-I/HMG-Y OS=Homo sapiens OX=9606 GN=HMGA1 PE=1 SV=3	P17096	71	P17096_K71	83.894	GRPK(1)GSK(1)NK(1)GAAK(1)TR	2	0.15705
sp|P17096|HMGA1_HUMAN High mobility group protein HMG-I/HMG-Y OS=Homo sapiens OX=9606 GN=HMGA1 PE=1 SV=3	P17096	46	P17096_K46	62.193	K(0.001)QPPVSPGTALVGSQK(0.999)EPSEVPTPK(1)RPR	4	1.6663
sp|P19338|NUCL_HUMAN Nucleolin OS=Homo sapiens OX=9606 GN=NCL PE=1 SV=3	P19338	79	P19338_K79	61.139	VAVATPAK(0.998)K(0.996)AAVTPGK(0.005)K	3	0.33752
sp|P19338|NUCL_HUMAN Nucleolin OS=Homo sapiens OX=9606 GN=NCL PE=1 SV=3	P19338	80	P19338_K80	61.139	VAVATPAK(0.998)K(0.996)AAVTPGK(0.005)K	3	0.33752
sp|P21741|MK_HUMAN Midkine OS=Homo sapiens OX=9606 GN=MDK PE=1 SV=1	P21741	124	P21741_K124	63.426	VTK(1)PCTPK(1)TK(1)AK	2	-2.0669
sp|P21741|MK_HUMAN Midkine OS=Homo sapiens OX=9606 GN=MDK PE=1 SV=1	P21741	129	P21741_K129	63.426	VTK(1)PCTPK(1)TK(1)AK	2	-2.0669
sp|P21741|MK_HUMAN Midkine OS=Homo sapiens OX=9606 GN=MDK PE=1 SV=1	P21741	131	P21741_K131	63.426	VTK(1)PCTPK(1)TK(1)AK	2	-2.0669
sp|P23511|NFYA_HUMAN Nuclear transcription factor Y subunit alpha OS=Homo sapiens OX=9606 GN=NFYA PE=1 SV=2	P23511	322	P23511_K322	80.455	FFSPK(1)EK	2	0.63966
sp|P23511|NFYA_HUMAN Nuclear transcription factor Y subunit alpha OS=Homo sapiens OX=9606 GN=NFYA PE=1 SV=2	P23511	270	P23511_K270	166.3	IPLPGAEMLEEEPLYVNAK(1)QYHR	4	0.58851
sp|P25440|BRD2_HUMAN Bromodomain-containing protein 2 OS=Homo sapiens OX=9606 GN=BRD2 PE=1 SV=2	P25440	546	P25440_K546	96.153	AVHEQLAALSQGPISK(0.192)PK(0.808)R	3	-0.028717
sp|P25490|TYY1_HUMAN Transcriptional repressor protein YY1 OS=Homo sapiens OX=9606 GN=YY1 PE=1 SV=2	P25490	288	P25490_K288	91.853	K(0.002)IK(0.998)EDDAPR	2	-0.8309
sp|P27695|APEX1_HUMAN DNA-(apurinic or apyrimidinic site) endonuclease OS=Homo sapiens OX=9606 GN=APEX1 PE=1 SV=2	P27695	3	P27695_K3	54.004	PK(1)RGK(1)K(1)GAVAEDGDELR	3	0.40321
sp|P27695|APEX1_HUMAN DNA-(apurinic or apyrimidinic site) endonuclease OS=Homo sapiens OX=9606 GN=APEX1 PE=1 SV=2	P27695	6	P27695_K6	54.004	PK(1)RGK(1)K(1)GAVAEDGDELR	3	0.40321
sp|P27695|APEX1_HUMAN DNA-(apurinic or apyrimidinic site) endonuclease OS=Homo sapiens OX=9606 GN=APEX1 PE=1 SV=2	P27695	7	P27695_K7	54.004	PK(1)RGK(1)K(1)GAVAEDGDELR	3	0.40321
sp|P27695|APEX1_HUMAN DNA-(apurinic or apyrimidinic site) endonuclease OS=Homo sapiens OX=9606 GN=APEX1 PE=1 SV=2	P27695	24	P27695_K24	112.12	TEPEAK(1)K(1)SK(1)TAAK	1	-0.20431
sp|P27695|APEX1_HUMAN DNA-(apurinic or apyrimidinic site) endonuclease OS=Homo sapiens OX=9606 GN=APEX1 PE=1 SV=2	P27695	25	P27695_K25	112.12	TEPEAK(1)K(1)SK(1)TAAK	1	-0.20431
sp|P27695|APEX1_HUMAN DNA-(apurinic or apyrimidinic site) endonuclease OS=Homo sapiens OX=9606 GN=APEX1 PE=1 SV=2	P27695	27	P27695_K27	112.12	TEPEAK(1)K(1)SK(1)TAAK	1	-0.20431
sp|P28356|HXD9_HUMAN Homeobox protein Hox-D9 OS=Homo sapiens OX=9606 GN=HOXD9 PE=1 SV=5	P28356	339	P28356_K339	68.657	RMK(0.997)MK(0.575)K(0.428)MSK	2	-4.0884
sp|P28356|HXD9_HUMAN Homeobox protein Hox-D9 OS=Homo sapiens OX=9606 GN=HOXD9 PE=1 SV=5	P28356	341	P28356_K341	68.657	RMK(0.997)MK(0.575)K(0.428)MSK	2	-4.0884
sp|P35221|CTNA1_HUMAN Catenin alpha-1 OS=Homo sapiens OX=9606 GN=CTNNA1 PE=1 SV=1	P35221	370	P35221_K370	52.071	SDALNSAIDK(1)MTK(1)K(1)TRDLRR	2	-3.2021
sp|P35221|CTNA1_HUMAN Catenin alpha-1 OS=Homo sapiens OX=9606 GN=CTNNA1 PE=1 SV=1	P35221	373	P35221_K373	52.071	SDALNSAIDK(1)MTK(1)K(1)TRDLRR	2	-3.2021
sp|P35221|CTNA1_HUMAN Catenin alpha-1 OS=Homo sapiens OX=9606 GN=CTNNA1 PE=1 SV=1	P35221	374	P35221_K374	52.071	SDALNSAIDK(1)MTK(1)K(1)TRDLRR	2	-3.2021
sp|P35251|RFC1_HUMAN Replication factor C subunit 1 OS=Homo sapiens OX=9606 GN=RFC1 PE=1 SV=4	P35251	14	P35251_K14	72.152	FFGVIPSGK(1)K	2	-0.11678
sp|P35251|RFC1_HUMAN Replication factor C subunit 1 OS=Homo sapiens OX=9606 GN=RFC1 PE=1 SV=4	P35251	352	P35251_K352	58.246	LK(0.002)GETK(0.998)TPK(1)K	3	0.35182
sp|P35251|RFC1_HUMAN Replication factor C subunit 1 OS=Homo sapiens OX=9606 GN=RFC1 PE=1 SV=4	P35251	355	P35251_K355	58.246	LK(0.002)GETK(0.998)TPK(1)K	3	0.35182
sp|P35268|RL22_HUMAN Large ribosomal subunit protein eL22 OS=Homo sapiens OX=9606 GN=RPL22 PE=1 SV=2	P35268	5	P35268_K5	150.49	APVK(1)K(1)LVVK(1)GGK(1)K	2	1.0988
sp|P35268|RL22_HUMAN Large ribosomal subunit protein eL22 OS=Homo sapiens OX=9606 GN=RPL22 PE=1 SV=2	P35268	6	P35268_K6	150.49	APVK(1)K(1)LVVK(1)GGK(1)K	2	1.0988
sp|P35268|RL22_HUMAN Large ribosomal subunit protein eL22 OS=Homo sapiens OX=9606 GN=RPL22 PE=1 SV=2	P35268	10	P35268_K10	150.49	APVK(1)K(1)LVVK(1)GGK(1)K	2	1.0988
sp|P35268|RL22_HUMAN Large ribosomal subunit protein eL22 OS=Homo sapiens OX=9606 GN=RPL22 PE=1 SV=2	P35268	13	P35268_K13	77.912	APVK(1)K(1)LVVK(1)GGK(1)K	2	1.0988
sp|P35580|MYH10_HUMAN Myosin-10 OS=Homo sapiens OX=9606 GN=MYH10 PE=1 SV=3	P35580	1795	P35580_K1795	44.382	QNK(1)ELK(1)AK(1)LQELEGAVK(1)SK	3	-3.2945
sp|P35580|MYH10_HUMAN Myosin-10 OS=Homo sapiens OX=9606 GN=MYH10 PE=1 SV=3	P35580	1798	P35580_K1798	44.382	QNK(1)ELK(1)AK(1)LQELEGAVK(1)SK	3	-3.2945
sp|P35580|MYH10_HUMAN Myosin-10 OS=Homo sapiens OX=9606 GN=MYH10 PE=1 SV=3	P35580	1800	P35580_K1800	44.382	QNK(1)ELK(1)AK(1)LQELEGAVK(1)SK	3	-3.2945
sp|P35580|MYH10_HUMAN Myosin-10 OS=Homo sapiens OX=9606 GN=MYH10 PE=1 SV=3	P35580	1809	P35580_K1809	44.382	QNK(1)ELK(1)AK(1)LQELEGAVK(1)SK	3	-3.2945
sp|P35716|SOX11_HUMAN Transcription factor SOX-11 OS=Homo sapiens OX=9606 GN=SOX11 PE=1 SV=2	P35716	95	P35716_K95	42.338	RWK(0.001)MLK(0.001)DSEK(0.998)IPFIREAER	3	2.2325
sp|P36897|TGFR1_HUMAN TGF-beta receptor type-1 OS=Homo sapiens OX=9606 GN=TGFBR1 PE=1 SV=1	P36897	391	P36897_K391	54.15	VGTKRYMAPEVLDDSINMK(1)HFESFK	4	-2.7673
sp|P39748|FEN1_HUMAN Flap endonuclease 1 OS=Homo sapiens OX=9606 GN=FEN1 PE=1 SV=1	P39748	369	P39748_K369	100.22	AK(1)TGAAGK(1)FK(1)R	2	0.11167
sp|P39748|FEN1_HUMAN Flap endonuclease 1 OS=Homo sapiens OX=9606 GN=FEN1 PE=1 SV=1	P39748	375	P39748_K375	100.22	AK(1)TGAAGK(1)FK(1)R	2	0.11167
sp|P39748|FEN1_HUMAN Flap endonuclease 1 OS=Homo sapiens OX=9606 GN=FEN1 PE=1 SV=1	P39748	377	P39748_K377	100.22	AK(1)TGAAGK(1)FK(1)R	2	0.11167
sp|P42285|MTREX_HUMAN Exosome RNA helicase MTR4 OS=Homo sapiens OX=9606 GN=MTREX PE=1 SV=3	P42285	24	P42285_K24	83.939	ADAFGDELFSVFEGDSTTAAGTK(1)K	2	0.59042
sp|P42285|MTREX_HUMAN Exosome RNA helicase MTR4 OS=Homo sapiens OX=9606 GN=MTREX PE=1 SV=3	P42285	25	P42285_K25	68.049	ADAFGDELFSVFEGDSTTAAGTK(0.888)K(0.556)DK(0.556)EK	3	0.066317
sp|P42285|MTREX_HUMAN Exosome RNA helicase MTR4 OS=Homo sapiens OX=9606 GN=MTREX PE=1 SV=3	P42285	27	P42285_K27	68.049	ADAFGDELFSVFEGDSTTAAGTK(0.888)K(0.556)DK(0.556)EK	3	0.066317
sp|P42766|RL35_HUMAN Large ribosomal subunit protein uL29 OS=Homo sapiens OX=9606 GN=RPL35 PE=1 SV=2	P42766	97	P42766_K97	117.14	RLNK(1)HEENLK(1)TK	3	0.64014
sp|P42766|RL35_HUMAN Large ribosomal subunit protein uL29 OS=Homo sapiens OX=9606 GN=RPL35 PE=1 SV=2	P42766	103	P42766_K103	117.14	RLNK(1)HEENLK(1)TK	3	0.64014
sp|P46777|RL5_HUMAN Large ribosomal subunit protein uL18 OS=Homo sapiens OX=9606 GN=RPL5 PE=1 SV=3	P46777	27	P46777_K27	77.058	EGK(1)TDYYAR	2	-1.948
sp|P46777|RL5_HUMAN Large ribosomal subunit protein uL18 OS=Homo sapiens OX=9606 GN=RPL5 PE=1 SV=3	P46777	283	P46777_K283	106.6	VAQK(1)K(1)ASFLR	2	-1.3369
sp|P46777|RL5_HUMAN Large ribosomal subunit protein uL18 OS=Homo sapiens OX=9606 GN=RPL5 PE=1 SV=3	P46777	284	P46777_K284	106.6	VAQK(1)K(1)ASFLR	2	-1.3369
sp|P48739|PIPNB_HUMAN Phosphatidylinositol transfer protein beta isoform OS=Homo sapiens OX=9606 GN=PITPNB PE=1 SV=2	P48739	252	P48739_K252	54.486	MEDETQK(1)ELETMRKR	2	0.16819
sp|P50914|RL14_HUMAN Large ribosomal subunit protein eL14 OS=Homo sapiens OX=9606 GN=RPL14 PE=1 SV=4	P50914	209	P50914_K209	58.23	APAPK(1)ASGK(1)K	2	-0.22641
sp|P50914|RL14_HUMAN Large ribosomal subunit protein eL14 OS=Homo sapiens OX=9606 GN=RPL14 PE=1 SV=4	P50914	213	P50914_K213	58.23	APAPK(1)ASGK(1)K	2	-0.22641
sp|P51532|SMCA4_HUMAN Transcription activator BRG1 OS=Homo sapiens OX=9606 GN=SMARCA4 PE=1 SV=2	P51532	437	P51532_K437	103.39	DTALETALNAK(1)AYK(1)R	2	-0.16261
sp|P51532|SMCA4_HUMAN Transcription activator BRG1 OS=Homo sapiens OX=9606 GN=SMARCA4 PE=1 SV=2	P51532	440	P51532_K440	103.39	DTALETALNAK(1)AYK(1)R	2	-0.16261
sp|P52926|HMGA2_HUMAN High mobility group protein HMGI-C OS=Homo sapiens OX=9606 GN=HMGA2 PE=1 SV=1	P52926	66	P52926_K66	121.68	SPSK(1)AAQK(1)K(1)AEATGEK	2	0.60142
sp|P52926|HMGA2_HUMAN High mobility group protein HMGI-C OS=Homo sapiens OX=9606 GN=HMGA2 PE=1 SV=1	P52926	67	P52926_K67	121.68	SPSK(1)AAQK(1)K(1)AEATGEK	2	0.60142
sp|P52926|HMGA2_HUMAN High mobility group protein HMGI-C OS=Homo sapiens OX=9606 GN=HMGA2 PE=1 SV=1	P52926	46	P52926_K46	84.173	KQQQEPTGEPSPK(1)RPR	4	-1.3929
sp|P52926|HMGA2_HUMAN High mobility group protein HMGI-C OS=Homo sapiens OX=9606 GN=HMGA2 PE=1 SV=1	P52926	90	P52926_K90	81.525	KWPQQVVQK(1)K	3	1.4623
sp|P52926|HMGA2_HUMAN High mobility group protein HMGI-C OS=Homo sapiens OX=9606 GN=HMGA2 PE=1 SV=1	P52926	62	P52926_K62	79.317	SPSK(1)AAQK(1)K(1)AEATGEK	2	0.60142
sp|P53999|TCP4_HUMAN Activated RNA polymerase II transcriptional coactivator p15 OS=Homo sapiens OX=9606 GN=SUB1 PE=1 SV=3	P53999	28	P53999_K28	84.365	RK(1)K(1)QVAPEK(0.004)PVK(0.996)K	3	0.72157
sp|P53999|TCP4_HUMAN Activated RNA polymerase II transcriptional coactivator p15 OS=Homo sapiens OX=9606 GN=SUB1 PE=1 SV=3	P53999	29	P53999_K29	110.08	RK(1)K(1)QVAPEK(0.004)PVK(0.996)K	3	0.72157
sp|P53999|TCP4_HUMAN Activated RNA polymerase II transcriptional coactivator p15 OS=Homo sapiens OX=9606 GN=SUB1 PE=1 SV=3	P53999	38	P53999_K38	84.365	RK(1)K(1)QVAPEK(0.004)PVK(0.996)K	3	0.72157
sp|P54198|HIRA_HUMAN Protein HIRA OS=Homo sapiens OX=9606 GN=HIRA PE=1 SV=2	P54198	628	P54198_K628	79.116	ASSLSK(1)RK	2	2.6255
sp|P57789|KCNKA_HUMAN Potassium channel subfamily K member 10 OS=Homo sapiens OX=9606 GN=KCNK10 PE=1 SV=1	P57789	457	P57789_K457	56.46	K(0.549)NK(0.451)DLK(0.096)K(0.904)TLPEDVQK	3	-3.2804
sp|P57789|KCNKA_HUMAN Potassium channel subfamily K member 10 OS=Homo sapiens OX=9606 GN=KCNK10 PE=1 SV=1	P57789	463	P57789_K463	56.46	K(0.549)NK(0.451)DLK(0.096)K(0.904)TLPEDVQK	3	-3.2804
sp|P60866|RS20_HUMAN Small ribosomal subunit protein uS10 OS=Homo sapiens OX=9606 GN=RPS20 PE=1 SV=1	P60866	8	P60866_K8	57.788	DTGK(1)TPVEPEVAIHR	3	0.16162
sp|P61024|CKS1_HUMAN Cyclin-dependent kinases regulatory subunit 1 OS=Homo sapiens OX=9606 GN=CKS1B PE=1 SV=1	P61024	4	P61024_K4	89.859	SHK(1)QIYYSDKYDDEEFEYR	3	-1.9231
sp|P61247|RS3A_HUMAN Small ribosomal subunit protein eS1 OS=Homo sapiens OX=9606 GN=RPS3A PE=1 SV=2	P61247	220	P61247_K220	42.981	K(1)PK(1)FELGK(1)LMELHGEGSSSGK	3	2.2954
sp|P61247|RS3A_HUMAN Small ribosomal subunit protein eS1 OS=Homo sapiens OX=9606 GN=RPS3A PE=1 SV=2	P61247	222	P61247_K222	42.981	K(1)PK(1)FELGK(1)LMELHGEGSSSGK	3	2.2954
sp|P61247|RS3A_HUMAN Small ribosomal subunit protein eS1 OS=Homo sapiens OX=9606 GN=RPS3A PE=1 SV=2	P61247	227	P61247_K227	42.981	K(1)PK(1)FELGK(1)LMELHGEGSSSGK	3	2.2954
sp|P62805|H4_HUMAN Histone H4 OS=Homo sapiens OX=9606 GN=H4C16 PE=1 SV=2	P62805	78	P62805_K78	78.705	DAVTYTEHAK(1)R	3	-0.076711
sp|P62805|H4_HUMAN Histone H4 OS=Homo sapiens OX=9606 GN=H4C16 PE=1 SV=2	P62805	80	P62805_K80	73.415	RK(1)TVTAMDVVYALK	3	0.54098
sp|P62805|H4_HUMAN Histone H4 OS=Homo sapiens OX=9606 GN=H4C16 PE=1 SV=2	P62805	92	P62805_K92	82.578	TVTAMDVVYALK(1)R	2	-0.21974
sp|P62851|RS25_HUMAN Small ribosomal subunit protein eS25 OS=Homo sapiens OX=9606 GN=RPS25 PE=1 SV=1	P62851	14	P62851_K14	74.475	DAGK(0.998)SAK(0.558)K(0.135)DK(0.308)DPVNK	3	0.2278
sp|P62851|RS25_HUMAN Small ribosomal subunit protein eS25 OS=Homo sapiens OX=9606 GN=RPS25 PE=1 SV=1	P62851	17	P62851_K17	74.475	DAGK(0.998)SAK(0.558)K(0.135)DK(0.308)DPVNK	3	0.2278
sp|P78316|NOP14_HUMAN Nucleolar protein 14 OS=Homo sapiens OX=9606 GN=NOP14 PE=1 SV=3	P78316	772	P78316_K772	76.143	LVK(1)VLEFGR	2	-0.68295
sp|P78316|NOP14_HUMAN Nucleolar protein 14 OS=Homo sapiens OX=9606 GN=NOP14 PE=1 SV=3	P78316	244	P78316_K244	71.806	SENRDK(0.993)K(0.008)EK(0.999)PK(1)PDAYDMMVR	2	-4.0246
sp|P78316|NOP14_HUMAN Nucleolar protein 14 OS=Homo sapiens OX=9606 GN=NOP14 PE=1 SV=3	P78316	247	P78316_K247	71.806	SENRDK(0.993)K(0.008)EK(0.999)PK(1)PDAYDMMVR	2	-4.0246
sp|P78316|NOP14_HUMAN Nucleolar protein 14 OS=Homo sapiens OX=9606 GN=NOP14 PE=1 SV=3	P78316	249	P78316_K249	71.806	SENRDK(0.993)K(0.008)EK(0.999)PK(1)PDAYDMMVR	2	-4.0246
sp|P78345|RPP38_HUMAN Ribonuclease P protein subunit p38 OS=Homo sapiens OX=9606 GN=RPP38 PE=1 SV=2	P78345	139	P78345_K139	82.865	SVK(1)PAMITSHLIQLSLSR	3	0.060983
sp|P78364|PHC1_HUMAN Polyhomeotic-like protein 1 OS=Homo sapiens OX=9606 GN=PHC1 PE=1 SV=3	P78364	843	P78364_K843	129.82	MK(1)EFQEANYAR	2	1.3347
sp|P78559|MAP1A_HUMAN Microtubule-associated protein 1A OS=Homo sapiens OX=9606 GN=MAP1A PE=1 SV=6	P78559	421	P78559_K421	51.998	DK(0.008)EK(0.193)K(0.797)EIK(0.001)K(0.001)ER	3	2.4346
sp|P82970|HMGN5_HUMAN High mobility group nucleosome-binding domain-containing protein 5 OS=Homo sapiens OX=9606 GN=HMGN5 PE=1 SV=1	P82970	37	P82970_K37	101.75	LSAMLVPVTPEVK(0.159)PK(0.841)R	3	-0.086119
sp|P84101|SERF2_HUMAN Small EDRK-rich factor 2 OS=Homo sapiens OX=9606 GN=SERF2 PE=1 SV=1	P84101	47	P84101_K47	58.32	DSEIMQQK(1)QK(1)K(1)ANEK	2	-0.78347
sp|P84101|SERF2_HUMAN Small EDRK-rich factor 2 OS=Homo sapiens OX=9606 GN=SERF2 PE=1 SV=1	P84101	49	P84101_K49	58.32	DSEIMQQK(1)QK(1)K(1)ANEK	2	-0.78347
sp|P84101|SERF2_HUMAN Small EDRK-rich factor 2 OS=Homo sapiens OX=9606 GN=SERF2 PE=1 SV=1	P84101	50	P84101_K50	58.32	DSEIMQQK(1)QK(1)K(1)ANEK	2	-0.78347
sp|P84101|SERF2_HUMAN Small EDRK-rich factor 2 OS=Homo sapiens OX=9606 GN=SERF2 PE=1 SV=1	P84101	13	P84101_K13	64.588	QK(1)NMK(1)K(1)QSDSVK(1)GK	2	0.50474
sp|P84101|SERF2_HUMAN Small EDRK-rich factor 2 OS=Homo sapiens OX=9606 GN=SERF2 PE=1 SV=1	P84101	16	P84101_K16	64.588	QK(1)NMK(1)K(1)QSDSVK(1)GK	2	0.50474
sp|P84101|SERF2_HUMAN Small EDRK-rich factor 2 OS=Homo sapiens OX=9606 GN=SERF2 PE=1 SV=1	P84101	17	P84101_K17	64.588	QK(1)NMK(1)K(1)QSDSVK(1)GK	2	0.50474
sp|P84101|SERF2_HUMAN Small EDRK-rich factor 2 OS=Homo sapiens OX=9606 GN=SERF2 PE=1 SV=1	P84101	23	P84101_K23	64.588	QK(1)NMK(1)K(1)QSDSVK(1)GK	2	0.50474
sp|Q01082|SPTB2_HUMAN Spectrin beta chain, non-erythrocytic 1 OS=Homo sapiens OX=9606 GN=SPTBN1 PE=1 SV=2	Q01082	2344	Q01082_K2344	84.566	AQTLPTSVVTITSESSPGK(1)R	2	-0.78412
sp|Q05519|SRS11_HUMAN Serine/arginine-rich splicing factor 11 OS=Homo sapiens OX=9606 GN=SRSF11 PE=1 SV=1	Q05519	241	Q05519_K241	129.76	EAQSLISAAIEPDK(0.664)K(0.386)EEK(0.95)R	2	-1.6626
sp|Q05519|SRS11_HUMAN Serine/arginine-rich splicing factor 11 OS=Homo sapiens OX=9606 GN=SRSF11 PE=1 SV=1	Q05519	242	Q05519_K242	89.557	EAQSLISAAIEPDK(0.169)K(0.845)EEK(0.986)R	3	-0.22915
sp|Q05519|SRS11_HUMAN Serine/arginine-rich splicing factor 11 OS=Homo sapiens OX=9606 GN=SRSF11 PE=1 SV=1	Q05519	245	Q05519_K245	89.557	EAQSLISAAIEPDK(0.169)K(0.845)EEK(0.986)R	3	-0.22915
sp|Q08AG5|ZN844_HUMAN Zinc finger protein 844 OS=Homo sapiens OX=9606 GN=ZNF844 PE=1 SV=1	Q08AG5	334	Q08AG5_K334	73.233	HEVTHSGK(1)K	2	0.2823
sp|Q09328|MGT5A_HUMAN Alpha-1,6-mannosylglycoprotein 6-beta-N-acetylglucosaminyltransferase A OS=Homo sapiens OX=9606 GN=MGAT5 PE=1 SV=1	Q09328	159	Q09328_K159	46.772	INVADIINGAQEK(0.008)CVLPPMDGYPHCEGK(0.994)IK(0.999)WMK(0.999)DMWR	3	-3.823
sp|Q09328|MGT5A_HUMAN Alpha-1,6-mannosylglycoprotein 6-beta-N-acetylglucosaminyltransferase A OS=Homo sapiens OX=9606 GN=MGAT5 PE=1 SV=1	Q09328	161	Q09328_K161	46.772	INVADIINGAQEK(0.008)CVLPPMDGYPHCEGK(0.994)IK(0.999)WMK(0.999)DMWR	3	-3.823
sp|Q09328|MGT5A_HUMAN Alpha-1,6-mannosylglycoprotein 6-beta-N-acetylglucosaminyltransferase A OS=Homo sapiens OX=9606 GN=MGAT5 PE=1 SV=1	Q09328	164	Q09328_K164	46.772	INVADIINGAQEK(0.008)CVLPPMDGYPHCEGK(0.994)IK(0.999)WMK(0.999)DMWR	3	-3.823
sp|Q12946|FOXF1_HUMAN Forkhead box protein F1 OS=Homo sapiens OX=9606 GN=FOXF1 PE=1 SV=2	Q12946	38	Q12946_K38	63.624	K(1)TNAGIRRPEK	3	1.5354
sp|Q12947|FOXF2_HUMAN Forkhead box protein F2 OS=Homo sapiens OX=9606 GN=FOXF2 PE=1 SV=2	Q12947	100	Q12947_K100	53.059	PEK(1)PPYSYIALIVMAIQSSPSK(1)R	3	-3.4208
sp|Q12947|FOXF2_HUMAN Forkhead box protein F2 OS=Homo sapiens OX=9606 GN=FOXF2 PE=1 SV=2	Q12947	119	Q12947_K119	53.059	PEK(1)PPYSYIALIVMAIQSSPSK(1)R	3	-3.4208
sp|Q12948|FOXC1_HUMAN Forkhead box protein C1 OS=Homo sapiens OX=9606 GN=FOXC1 PE=1 SV=3	Q12948	175	Q12948_K175	63.565	RFK(1)K(1)K(1)DAVK	2	0.21031
sp|Q12948|FOXC1_HUMAN Forkhead box protein C1 OS=Homo sapiens OX=9606 GN=FOXC1 PE=1 SV=3	Q12948	176	Q12948_K176	63.565	RFK(1)K(1)K(1)DAVK	2	0.21031
sp|Q12948|FOXC1_HUMAN Forkhead box protein C1 OS=Homo sapiens OX=9606 GN=FOXC1 PE=1 SV=3	Q12948	177	Q12948_K177	63.565	RFK(1)K(1)K(1)DAVK	2	0.21031
sp|Q13428|TCOF_HUMAN Treacle protein OS=Homo sapiens OX=9606 GN=TCOF1 PE=1 SV=3	Q13428	1459	Q13428_K1459	92.906	K(0.222)K(0.831)K(0.947)AK(1)K(1)ASTK	1	-0.47126
sp|Q13428|TCOF_HUMAN Treacle protein OS=Homo sapiens OX=9606 GN=TCOF1 PE=1 SV=3	Q13428	1460	Q13428_K1460	92.906	K(0.222)K(0.831)K(0.947)AK(1)K(1)ASTK	1	-0.47126
sp|Q13428|TCOF_HUMAN Treacle protein OS=Homo sapiens OX=9606 GN=TCOF1 PE=1 SV=3	Q13428	1462	Q13428_K1462	92.906	K(0.222)K(0.831)K(0.947)AK(1)K(1)ASTK	1	-0.47126
sp|Q13428|TCOF_HUMAN Treacle protein OS=Homo sapiens OX=9606 GN=TCOF1 PE=1 SV=3	Q13428	1463	Q13428_K1463	92.906	K(0.222)K(0.831)K(0.947)AK(1)K(1)ASTK	1	-0.47126
sp|Q13435|SF3B2_HUMAN Splicing factor 3B subunit 2 OS=Homo sapiens OX=9606 GN=SF3B2 PE=1 SV=2	Q13435	547	Q13435_K547	40.645	TGIQEMREALQEK(0.009)EEQK(0.991)TMK	3	0.83501
sp|Q13442|HAP28_HUMAN 28 kDa heat- and acid-stable phosphoprotein OS=Homo sapiens OX=9606 GN=PDAP1 PE=1 SV=1	Q13442	52	Q13442_K52	102.43	AREEEEQKEGGDGAAGDPK(1)K	3	1.1903
sp|Q13442|HAP28_HUMAN 28 kDa heat- and acid-stable phosphoprotein OS=Homo sapiens OX=9606 GN=PDAP1 PE=1 SV=1	Q13442	105	Q13442_K105	213.63	VTQLDLDGPK(1)ELSR	2	-1.3398
sp|Q13523|PRP4B_HUMAN Serine/threonine-protein kinase PRP4 homolog OS=Homo sapiens OX=9606 GN=PRPF4B PE=1 SV=3	Q13523	53	Q13523_K53	57.802	SK(1)HK(0.999)K(1)HK(0.998)HSSEEDK(0.002)DK(0.002)K	4	0.37692
sp|Q13523|PRP4B_HUMAN Serine/threonine-protein kinase PRP4 homolog OS=Homo sapiens OX=9606 GN=PRPF4B PE=1 SV=3	Q13523	55	Q13523_K55	57.802	SK(1)HK(0.999)K(1)HK(0.998)HSSEEDK(0.002)DK(0.002)K	4	0.37692
sp|Q13523|PRP4B_HUMAN Serine/threonine-protein kinase PRP4 homolog OS=Homo sapiens OX=9606 GN=PRPF4B PE=1 SV=3	Q13523	56	Q13523_K56	57.802	SK(1)HK(0.999)K(1)HK(0.998)HSSEEDK(0.002)DK(0.002)K	4	0.37692
sp|Q13523|PRP4B_HUMAN Serine/threonine-protein kinase PRP4 homolog OS=Homo sapiens OX=9606 GN=PRPF4B PE=1 SV=3	Q13523	58	Q13523_K58	57.802	SK(1)HK(0.999)K(1)HK(0.998)HSSEEDK(0.002)DK(0.002)K	4	0.37692
sp|Q13617|CUL2_HUMAN Cullin-2 OS=Homo sapiens OX=9606 GN=CUL2 PE=1 SV=2	Q13617	720	Q13617_K720	93.226	FNPSISMIK(0.001)K(0.999)CIEVLIDK	3	-2.8285
sp|Q13972|RGRF1_HUMAN Ras-specific guanine nucleotide-releasing factor 1 OS=Homo sapiens OX=9606 GN=RASGRF1 PE=1 SV=2	Q13972	756	Q13972_K756	47.039	K(1)LSLNIPIITGGK	3	-0.15625
sp|Q14141|SEPT6_HUMAN Septin-6 OS=Homo sapiens OX=9606 GN=SEPTIN6 PE=1 SV=4	Q14141	353	Q14141_K353	44.729	EK(0.849)EAELK(0.132)EAEK(0.135)ELHEK(0.867)FDRLK(0.017)K	3	-1.2368
sp|Q14141|SEPT6_HUMAN Septin-6 OS=Homo sapiens OX=9606 GN=SEPTIN6 PE=1 SV=4	Q14141	367	Q14141_K367	44.729	EK(0.849)EAELK(0.132)EAEK(0.135)ELHEK(0.867)FDRLK(0.017)K	3	-1.2368
sp|Q14201|BTG3_HUMAN Protein BTG3 OS=Homo sapiens OX=9606 GN=BTG3 PE=1 SV=3	Q14201	2	Q14201_K2	42.172	MK(0.995)NEIAAVVFFFTRLVRK(0.003)HDK(0.002)LK	4	0.86492
sp|Q14320|FA50A_HUMAN Protein FAM50A OS=Homo sapiens OX=9606 GN=FAM50A PE=1 SV=2	Q14320	19	Q14320_K19	44.831	GAASEAGRAMHLMK(0.477)K(0.477)REK(0.047)QR	3	-0.47189
sp|Q14320|FA50A_HUMAN Protein FAM50A OS=Homo sapiens OX=9606 GN=FAM50A PE=1 SV=2	Q14320	20	Q14320_K20	44.831	GAASEAGRAMHLMK(0.477)K(0.477)REK(0.047)QR	3	-0.47189
sp|Q14324|MYPC2_HUMAN Myosin-binding protein C, fast-type OS=Homo sapiens OX=9606 GN=MYBPC2 PE=1 SV=2	Q14324	13	Q14324_K13	43.502	APK(1)GK(1)DAPK(1)GAPK(1)EAPPK	2	3.9125
sp|Q14324|MYPC2_HUMAN Myosin-binding protein C, fast-type OS=Homo sapiens OX=9606 GN=MYBPC2 PE=1 SV=2	Q14324	15	Q14324_K15	43.502	APK(1)GK(1)DAPK(1)GAPK(1)EAPPK	2	3.9125
sp|Q14324|MYPC2_HUMAN Myosin-binding protein C, fast-type OS=Homo sapiens OX=9606 GN=MYBPC2 PE=1 SV=2	Q14324	19	Q14324_K19	43.502	APK(1)GK(1)DAPK(1)GAPK(1)EAPPK	2	3.9125
sp|Q14324|MYPC2_HUMAN Myosin-binding protein C, fast-type OS=Homo sapiens OX=9606 GN=MYBPC2 PE=1 SV=2	Q14324	23	Q14324_K23	43.502	APK(1)GK(1)DAPK(1)GAPK(1)EAPPK	2	3.9125
sp|Q14978|NOLC1_HUMAN Nucleolar and coiled-body phosphoprotein 1 OS=Homo sapiens OX=9606 GN=NOLC1 PE=1 SV=2	Q14978	208	Q14978_K208	121.09	AAPK(1)IANGK	2	-0.067736
sp|Q14978|NOLC1_HUMAN Nucleolar and coiled-body phosphoprotein 1 OS=Homo sapiens OX=9606 GN=NOLC1 PE=1 SV=2	Q14978	201	Q14978_K201	104.45	APPK(1)PAR	2	-0.30508
sp|Q14978|NOLC1_HUMAN Nucleolar and coiled-body phosphoprotein 1 OS=Homo sapiens OX=9606 GN=NOLC1 PE=1 SV=2	Q14978	493	Q14978_K493	66.027	K(0.46)K(0.497)PQK(0.043)VAGGAAPSK(0.294)PASAK(0.706)K	3	-0.77632
sp|Q14978|NOLC1_HUMAN Nucleolar and coiled-body phosphoprotein 1 OS=Homo sapiens OX=9606 GN=NOLC1 PE=1 SV=2	Q14978	496	Q14978_K496	150.14	KPQK(1)VAGGAAPSKPASAK	2	-1.4635
sp|Q14978|NOLC1_HUMAN Nucleolar and coiled-body phosphoprotein 1 OS=Homo sapiens OX=9606 GN=NOLC1 PE=1 SV=2	Q14978	510	Q14978_K510	150.14	KKPQK(1)VAGGAAPSK(0.002)PASAK(0.998)K	2	-1.6658
sp|Q14978|NOLC1_HUMAN Nucleolar and coiled-body phosphoprotein 1 OS=Homo sapiens OX=9606 GN=NOLC1 PE=1 SV=2	Q14978	76	Q14978_K76	160.91	LQANGPVAK(1)K(1)AK	2	0.41297
sp|Q14978|NOLC1_HUMAN Nucleolar and coiled-body phosphoprotein 1 OS=Homo sapiens OX=9606 GN=NOLC1 PE=1 SV=2	Q14978	77	Q14978_K77	95.094	LQANGPVAK(1)K(1)AK	2	0.41297
sp|Q14978|NOLC1_HUMAN Nucleolar and coiled-body phosphoprotein 1 OS=Homo sapiens OX=9606 GN=NOLC1 PE=1 SV=2	Q14978	246	Q14978_K246	86.467	TVPK(1)K(1)QVVAK(1)APVK	2	-0.35115
sp|Q14978|NOLC1_HUMAN Nucleolar and coiled-body phosphoprotein 1 OS=Homo sapiens OX=9606 GN=NOLC1 PE=1 SV=2	Q14978	251	Q14978_K251	111.79	TVPK(1)K(1)QVVAK(1)APVK	2	-0.35115
sp|Q14978|NOLC1_HUMAN Nucleolar and coiled-body phosphoprotein 1 OS=Homo sapiens OX=9606 GN=NOLC1 PE=1 SV=2	Q14978	255	Q14978_K255	111.79	QVVAK(1)APVK(1)AATTPTR	2	0.04585
sp|Q14978|NOLC1_HUMAN Nucleolar and coiled-body phosphoprotein 1 OS=Homo sapiens OX=9606 GN=NOLC1 PE=1 SV=2	Q14978	613	Q14978_K613	153.05	LQTPNTFPK(1)RK	2	0.20673
sp|Q14978|NOLC1_HUMAN Nucleolar and coiled-body phosphoprotein 1 OS=Homo sapiens OX=9606 GN=NOLC1 PE=1 SV=2	Q14978	407	Q14978_K407	135.72	PAAAPK(1)QPVGGGQK(1)LLTR	2	-1.1634
sp|Q14978|NOLC1_HUMAN Nucleolar and coiled-body phosphoprotein 1 OS=Homo sapiens OX=9606 GN=NOLC1 PE=1 SV=2	Q14978	415	Q14978_K415	68.952	PAAAPK(1)QPVGGGQK(1)LLTR	2	-1.1634
sp|Q14978|NOLC1_HUMAN Nucleolar and coiled-body phosphoprotein 1 OS=Homo sapiens OX=9606 GN=NOLC1 PE=1 SV=2	Q14978	310	Q14978_K310	92.457	SLGTQPPK(1)K(1)AVEK	2	1.8417
sp|Q14978|NOLC1_HUMAN Nucleolar and coiled-body phosphoprotein 1 OS=Homo sapiens OX=9606 GN=NOLC1 PE=1 SV=2	Q14978	311	Q14978_K311	92.457	SLGTQPPK(1)K(1)AVEK	2	1.8417
sp|Q14978|NOLC1_HUMAN Nucleolar and coiled-body phosphoprotein 1 OS=Homo sapiens OX=9606 GN=NOLC1 PE=1 SV=2	Q14978	245	Q14978_K245	86.467	TVPK(1)K(1)QVVAK(1)APVK	2	-0.35115
sp|Q15014|MO4L2_HUMAN Mortality factor 4-like protein 2 OS=Homo sapiens OX=9606 GN=MORF4L2 PE=1 SV=1	Q15014	41	Q15014_K41	89.663	GASSGK(1)K(1)TAGPQQK	2	-0.067078
sp|Q15014|MO4L2_HUMAN Mortality factor 4-like protein 2 OS=Homo sapiens OX=9606 GN=MORF4L2 PE=1 SV=1	Q15014	42	Q15014_K42	89.663	GASSGK(1)K(1)TAGPQQK	2	-0.067078
sp|Q15014|MO4L2_HUMAN Mortality factor 4-like protein 2 OS=Homo sapiens OX=9606 GN=MORF4L2 PE=1 SV=1	Q15014	22	Q15014_K22	128.22	GQQSAEEENFK(1)K(1)PTR	2	-2.9552
sp|Q15014|MO4L2_HUMAN Mortality factor 4-like protein 2 OS=Homo sapiens OX=9606 GN=MORF4L2 PE=1 SV=1	Q15014	23	Q15014_K23	128.22	GQQSAEEENFK(1)K(1)PTR	2	-2.9552
sp|Q15054|DPOD3_HUMAN DNA polymerase delta subunit 3 OS=Homo sapiens OX=9606 GN=POLD3 PE=1 SV=2	Q15054	282	Q15054_K282	75.911	LATPAGLK(1)K(1)SSK(1)K	2	-1.2831
sp|Q15054|DPOD3_HUMAN DNA polymerase delta subunit 3 OS=Homo sapiens OX=9606 GN=POLD3 PE=1 SV=2	Q15054	283	Q15054_K283	75.911	LATPAGLK(1)K(1)SSK(1)K	2	-1.2831
sp|Q15054|DPOD3_HUMAN DNA polymerase delta subunit 3 OS=Homo sapiens OX=9606 GN=POLD3 PE=1 SV=2	Q15054	286	Q15054_K286	75.911	LATPAGLK(1)K(1)SSK(1)K	2	-1.2831
sp|Q15397|PUM3_HUMAN Pumilio homolog 3 OS=Homo sapiens OX=9606 GN=PUM3 PE=1 SV=3	Q15397	152	Q15397_K152	50.938	DCDK(0.498)EK(0.498)RVK(0.006)LMSDLQK(0.999)LIQGK	3	-4.1849
sp|Q15397|PUM3_HUMAN Pumilio homolog 3 OS=Homo sapiens OX=9606 GN=PUM3 PE=1 SV=3	Q15397	154	Q15397_K154	50.938	DCDK(0.498)EK(0.498)RVK(0.006)LMSDLQK(0.999)LIQGK	3	-4.1849
sp|Q15397|PUM3_HUMAN Pumilio homolog 3 OS=Homo sapiens OX=9606 GN=PUM3 PE=1 SV=3	Q15397	164	Q15397_K164	50.938	DCDK(0.498)EK(0.498)RVK(0.006)LMSDLQK(0.999)LIQGK	3	-4.1849
sp|Q15648|MED1_HUMAN Mediator of RNA polymerase II transcription subunit 1 OS=Homo sapiens OX=9606 GN=MED1 PE=1 SV=4	Q15648	1442	Q15648_K1442	46.249	NYGSPLISGSTPK(1)HER	3	0.1892
sp|Q15651|HMGN3_HUMAN High mobility group nucleosome-binding domain-containing protein 3 OS=Homo sapiens OX=9606 GN=HMGN3 PE=1 SV=2	Q15651	17	Q15651_K17	86.467	DGSK(1)VTK(1)QEPTR	2	0.18325
sp|Q15651|HMGN3_HUMAN High mobility group nucleosome-binding domain-containing protein 3 OS=Homo sapiens OX=9606 GN=HMGN3 PE=1 SV=2	Q15651	20	Q15651_K20	93.111	VTK(1)QEPTR	2	-0.61345
sp|Q15651|HMGN3_HUMAN High mobility group nucleosome-binding domain-containing protein 3 OS=Homo sapiens OX=9606 GN=HMGN3 PE=1 SV=2	Q15651	63	Q15651_K63	59.606	GAK(0.11)GK(0.837)K(0.169)EEK(0.885)QEAGK	3	-0.72421
sp|Q15651|HMGN3_HUMAN High mobility group nucleosome-binding domain-containing protein 3 OS=Homo sapiens OX=9606 GN=HMGN3 PE=1 SV=2	Q15651	67	Q15651_K67	59.606	GAK(0.11)GK(0.837)K(0.169)EEK(0.885)QEAGK	3	-0.72421
sp|Q16280|CNGA2_HUMAN Cyclic nucleotide-gated olfactory channel OS=Homo sapiens OX=9606 GN=CNGA2 PE=2 SV=2	Q16280	489	Q16280_K489	68.515	KGDIGK(1)EMYIIK	2	0.50941
sp|Q16763|UBE2S_HUMAN Ubiquitin-conjugating enzyme E2 S OS=Homo sapiens OX=9606 GN=UBE2S PE=1 SV=2	Q16763	197	Q16763_K197	50.884	ALASGTEASSTDPGAPGGPGGAEGPMAK(1)K(1)HAGER	2	-1.1943
sp|Q16763|UBE2S_HUMAN Ubiquitin-conjugating enzyme E2 S OS=Homo sapiens OX=9606 GN=UBE2S PE=1 SV=2	Q16763	198	Q16763_K198	50.884	ALASGTEASSTDPGAPGGPGGAEGPMAK(1)K(1)HAGER	2	-1.1943
sp|Q1ED39|KNOP1_HUMAN Lysine-rich nucleolar protein 1 OS=Homo sapiens OX=9606 GN=KNOP1 PE=1 SV=1	Q1ED39	199	Q1ED39_K199	97.779	KDEEQAALGQK(1)R	2	1.2017
sp|Q2TBE0|C19L2_HUMAN CWF19-like protein 2 OS=Homo sapiens OX=9606 GN=CWF19L2 PE=1 SV=4	Q2TBE0	93	Q2TBE0_K93	51.135	EK(1)K(1)K(0.987)K(0.043)SK(0.987)K(0.984)QK	2	0.32682
sp|Q2TBE0|C19L2_HUMAN CWF19-like protein 2 OS=Homo sapiens OX=9606 GN=CWF19L2 PE=1 SV=4	Q2TBE0	94	Q2TBE0_K94	51.135	EK(1)K(1)K(0.987)K(0.043)SK(0.987)K(0.984)QK	2	0.32682
sp|Q2TBE0|C19L2_HUMAN CWF19-like protein 2 OS=Homo sapiens OX=9606 GN=CWF19L2 PE=1 SV=4	Q2TBE0	95	Q2TBE0_K95	51.135	EK(1)K(1)K(0.987)K(0.043)SK(0.987)K(0.984)QK	2	0.32682
sp|Q2TBE0|C19L2_HUMAN CWF19-like protein 2 OS=Homo sapiens OX=9606 GN=CWF19L2 PE=1 SV=4	Q2TBE0	98	Q2TBE0_K98	51.135	EK(1)K(1)K(0.987)K(0.043)SK(0.987)K(0.984)QK	2	0.32682
sp|Q2TBE0|C19L2_HUMAN CWF19-like protein 2 OS=Homo sapiens OX=9606 GN=CWF19L2 PE=1 SV=4	Q2TBE0	99	Q2TBE0_K99	51.135	EK(1)K(1)K(0.987)K(0.043)SK(0.987)K(0.984)QK	2	0.32682
sp|Q2WGJ9|FR1L6_HUMAN Fer-1-like protein 6 OS=Homo sapiens OX=9606 GN=FER1L6 PE=2 SV=2	Q2WGJ9	432	Q2WGJ9_K432	63.662	DSK(0.922)SSK(0.074)GK(0.003)DK(0.001)ADK	2	0.81509
sp|Q3L8U1|CHD9_HUMAN Chromodomain-helicase-DNA-binding protein 9 OS=Homo sapiens OX=9606 GN=CHD9 PE=1 SV=2	Q3L8U1	577	Q3L8U1_K577	51.546	RMKSK(0.001)PK(0.127)DK(0.872)DSK	3	1.8809
sp|Q5BKY9|F133B_HUMAN Protein FAM133B OS=Homo sapiens OX=9606 GN=FAM133B PE=1 SV=1	Q5BKY9	89	Q5BKY9_K89	72.705	LLSGSESSSK(1)K(1)R	2	0.057194
sp|Q5BKY9|F133B_HUMAN Protein FAM133B OS=Homo sapiens OX=9606 GN=FAM133B PE=1 SV=1	Q5BKY9	90	Q5BKY9_K90	72.705	LLSGSESSSK(1)K(1)R	2	0.057194
sp|Q5FVE4|ACBG2_HUMAN Long-chain-fatty-acid--CoA ligase ACSBG2 OS=Homo sapiens OX=9606 GN=ACSBG2 PE=1 SV=2	Q5FVE4	337	Q5FVE4_K337	47.227	K(0.004)NSAK(0.996)SMGLK(1)K(1)K	2	-2.2987
sp|Q5FVE4|ACBG2_HUMAN Long-chain-fatty-acid--CoA ligase ACSBG2 OS=Homo sapiens OX=9606 GN=ACSBG2 PE=1 SV=2	Q5FVE4	342	Q5FVE4_K342	47.227	K(0.004)NSAK(0.996)SMGLK(1)K(1)K	2	-2.2987
sp|Q5FVE4|ACBG2_HUMAN Long-chain-fatty-acid--CoA ligase ACSBG2 OS=Homo sapiens OX=9606 GN=ACSBG2 PE=1 SV=2	Q5FVE4	343	Q5FVE4_K343	47.227	K(0.004)NSAK(0.996)SMGLK(1)K(1)K	2	-2.2987
sp|Q5H9U9|DDX6L_HUMAN Probable ATP-dependent RNA helicase DDX60-like OS=Homo sapiens OX=9606 GN=DDX60L PE=2 SV=3	Q5H9U9	638	Q5H9U9_K638	51.009	K(0.997)HCRGEGK(0.979)ISK(0.024)DLSIAVQMMKR	2	-0.26918
sp|Q5H9U9|DDX6L_HUMAN Probable ATP-dependent RNA helicase DDX60-like OS=Homo sapiens OX=9606 GN=DDX60L PE=2 SV=3	Q5H9U9	645	Q5H9U9_K645	51.009	K(0.997)HCRGEGK(0.979)ISK(0.024)DLSIAVQMMKR	2	-0.26918
sp|Q5HYC2|K2026_HUMAN Uncharacterized protein KIAA2026 OS=Homo sapiens OX=9606 GN=KIAA2026 PE=2 SV=2	Q5HYC2	736	Q5HYC2_K736	50.452	HK(1)SGK(1)K(1)SVSK(1)K	3	3.3554
sp|Q5HYC2|K2026_HUMAN Uncharacterized protein KIAA2026 OS=Homo sapiens OX=9606 GN=KIAA2026 PE=2 SV=2	Q5HYC2	739	Q5HYC2_K739	50.452	HK(1)SGK(1)K(1)SVSK(1)K	3	3.3554
sp|Q5HYC2|K2026_HUMAN Uncharacterized protein KIAA2026 OS=Homo sapiens OX=9606 GN=KIAA2026 PE=2 SV=2	Q5HYC2	740	Q5HYC2_K740	50.452	HK(1)SGK(1)K(1)SVSK(1)K	3	3.3554
sp|Q5HYC2|K2026_HUMAN Uncharacterized protein KIAA2026 OS=Homo sapiens OX=9606 GN=KIAA2026 PE=2 SV=2	Q5HYC2	744	Q5HYC2_K744	50.452	HK(1)SGK(1)K(1)SVSK(1)K	3	3.3554
sp|Q5T3I0|GPTC4_HUMAN G patch domain-containing protein 4 OS=Homo sapiens OX=9606 GN=GPATCH4 PE=1 SV=2	Q5T3I0	437	Q5T3I0_K437	108.68	AGVSTVQK(1)AK(1)K(1)K	2	0.42571
sp|Q5T3I0|GPTC4_HUMAN G patch domain-containing protein 4 OS=Homo sapiens OX=9606 GN=GPATCH4 PE=1 SV=2	Q5T3I0	439	Q5T3I0_K439	108.68	AGVSTVQK(1)AK(1)K(1)K	2	0.42571
sp|Q5T3I0|GPTC4_HUMAN G patch domain-containing protein 4 OS=Homo sapiens OX=9606 GN=GPATCH4 PE=1 SV=2	Q5T3I0	440	Q5T3I0_K440	108.68	AGVSTVQK(1)AK(1)K(1)K	2	0.42571
sp|Q5T3I0|GPTC4_HUMAN G patch domain-containing protein 4 OS=Homo sapiens OX=9606 GN=GPATCH4 PE=1 SV=2	Q5T3I0	203	Q5T3I0_K203	86.016	PPK(1)K(1)K(1)K(1)K(1)K	2	0.28315
sp|Q5T3I0|GPTC4_HUMAN G patch domain-containing protein 4 OS=Homo sapiens OX=9606 GN=GPATCH4 PE=1 SV=2	Q5T3I0	204	Q5T3I0_K204	44.318	PPK(1)K(1)K(1)K(1)K(1)K	2	0.28315
sp|Q5T3I0|GPTC4_HUMAN G patch domain-containing protein 4 OS=Homo sapiens OX=9606 GN=GPATCH4 PE=1 SV=2	Q5T3I0	205	Q5T3I0_K205	44.318	PPK(1)K(1)K(1)K(1)K(1)K	2	0.28315
sp|Q5T3I0|GPTC4_HUMAN G patch domain-containing protein 4 OS=Homo sapiens OX=9606 GN=GPATCH4 PE=1 SV=2	Q5T3I0	206	Q5T3I0_K206	44.318	PPK(1)K(1)K(1)K(1)K(1)K	2	0.28315
sp|Q5T3I0|GPTC4_HUMAN G patch domain-containing protein 4 OS=Homo sapiens OX=9606 GN=GPATCH4 PE=1 SV=2	Q5T3I0	207	Q5T3I0_K207	44.318	PPK(1)K(1)K(1)K(1)K(1)K	2	0.28315
sp|Q5T3I0|GPTC4_HUMAN G patch domain-containing protein 4 OS=Homo sapiens OX=9606 GN=GPATCH4 PE=1 SV=2	Q5T3I0	212	Q5T3I0_K212	84.169	RQK(1)EEEEATASER	2	0.54615
sp|Q5T481|RBM20_HUMAN RNA-binding protein 20 OS=Homo sapiens OX=9606 GN=RBM20 PE=1 SV=4	Q5T481	819	Q5T481_K819	51.786	APEGAK(1)AK(1)QNEK(1)NK(1)TK(1)RTDR	3	2.877
sp|Q5T481|RBM20_HUMAN RNA-binding protein 20 OS=Homo sapiens OX=9606 GN=RBM20 PE=1 SV=4	Q5T481	821	Q5T481_K821	51.786	APEGAK(1)AK(1)QNEK(1)NK(1)TK(1)RTDR	3	2.877
sp|Q5T481|RBM20_HUMAN RNA-binding protein 20 OS=Homo sapiens OX=9606 GN=RBM20 PE=1 SV=4	Q5T481	825	Q5T481_K825	51.786	APEGAK(1)AK(1)QNEK(1)NK(1)TK(1)RTDR	3	2.877
sp|Q5T481|RBM20_HUMAN RNA-binding protein 20 OS=Homo sapiens OX=9606 GN=RBM20 PE=1 SV=4	Q5T481	827	Q5T481_K827	51.786	APEGAK(1)AK(1)QNEK(1)NK(1)TK(1)RTDR	3	2.877
sp|Q5T481|RBM20_HUMAN RNA-binding protein 20 OS=Homo sapiens OX=9606 GN=RBM20 PE=1 SV=4	Q5T481	829	Q5T481_K829	51.786	APEGAK(1)AK(1)QNEK(1)NK(1)TK(1)RTDR	3	2.877
sp|Q5TEC6|H37_HUMAN Histone H3-7 OS=Homo sapiens OX=9606 GN=H3-7 PE=1 SV=1	Q5TEC6	80	Q5TEC6_K80	95.502	EIAQEFK(1)TDLR	2	-0.32211
sp|Q6NYC1|JMJD6_HUMAN Bifunctional arginine demethylase and lysyl-hydroxylase JMJD6 OS=Homo sapiens OX=9606 GN=JMJD6 PE=1 SV=1	Q6NYC1	154	Q6NYC1_K154	140.01	VPK(1)FFTDDLFQYAGEK	3	0.28551
sp|Q6PH85|DCNL2_HUMAN DCN1-like protein 2 OS=Homo sapiens OX=9606 GN=DCUN1D2 PE=1 SV=1	Q6PH85	3	Q6PH85_K3	46.35	MHK(1)LK(1)SSQK(1)DK(1)VRQFMACTQAGER	3	2.6201
sp|Q6PH85|DCNL2_HUMAN DCN1-like protein 2 OS=Homo sapiens OX=9606 GN=DCUN1D2 PE=1 SV=1	Q6PH85	5	Q6PH85_K5	46.35	MHK(1)LK(1)SSQK(1)DK(1)VRQFMACTQAGER	3	2.6201
sp|Q6PH85|DCNL2_HUMAN DCN1-like protein 2 OS=Homo sapiens OX=9606 GN=DCUN1D2 PE=1 SV=1	Q6PH85	9	Q6PH85_K9	46.35	MHK(1)LK(1)SSQK(1)DK(1)VRQFMACTQAGER	3	2.6201
sp|Q6PH85|DCNL2_HUMAN DCN1-like protein 2 OS=Homo sapiens OX=9606 GN=DCUN1D2 PE=1 SV=1	Q6PH85	11	Q6PH85_K11	46.35	MHK(1)LK(1)SSQK(1)DK(1)VRQFMACTQAGER	3	2.6201
sp|Q6PL18|ATAD2_HUMAN ATPase family AAA domain-containing protein 2 OS=Homo sapiens OX=9606 GN=ATAD2 PE=1 SV=1	Q6PL18	1178	Q6PL18_K1178	59.898	KKSNWYLGTIK(1)K(1)R	2	-1.7198
sp|Q6PL18|ATAD2_HUMAN ATPase family AAA domain-containing protein 2 OS=Homo sapiens OX=9606 GN=ATAD2 PE=1 SV=1	Q6PL18	1179	Q6PL18_K1179	59.898	KKSNWYLGTIK(1)K(1)R	2	-1.7198
sp|Q6UX04|CWC27_HUMAN Spliceosome-associated protein CWC27 homolog OS=Homo sapiens OX=9606 GN=CWC27 PE=1 SV=1	Q6UX04	462	Q6UX04_K462	60.102	REESK(1)K(1)LMREK(1)K(1)ER	2	-3.5475
sp|Q6UX04|CWC27_HUMAN Spliceosome-associated protein CWC27 homolog OS=Homo sapiens OX=9606 GN=CWC27 PE=1 SV=1	Q6UX04	463	Q6UX04_K463	60.102	REESK(1)K(1)LMREK(1)K(1)ER	2	-3.5475
sp|Q6UX04|CWC27_HUMAN Spliceosome-associated protein CWC27 homolog OS=Homo sapiens OX=9606 GN=CWC27 PE=1 SV=1	Q6UX04	468	Q6UX04_K468	60.102	REESK(1)K(1)LMREK(1)K(1)ER	2	-3.5475
sp|Q6UX04|CWC27_HUMAN Spliceosome-associated protein CWC27 homolog OS=Homo sapiens OX=9606 GN=CWC27 PE=1 SV=1	Q6UX04	469	Q6UX04_K469	60.102	REESK(1)K(1)LMREK(1)K(1)ER	2	-3.5475
sp|Q7RTP6|MICA3_HUMAN [F-actin]-monooxygenase MICAL3 OS=Homo sapiens OX=9606 GN=MICAL3 PE=1 SV=2	Q7RTP6	670	Q7RTP6_K670	61.958	SPK(0.029)DK(0.431)K(0.431)EK(0.11)DLDGAGK	2	0.58583
sp|Q7RTP6|MICA3_HUMAN [F-actin]-monooxygenase MICAL3 OS=Homo sapiens OX=9606 GN=MICAL3 PE=1 SV=2	Q7RTP6	671	Q7RTP6_K671	61.958	SPK(0.029)DK(0.431)K(0.431)EK(0.11)DLDGAGK	2	0.58583
sp|Q7Z494|NPHP3_HUMAN Nephrocystin-3 OS=Homo sapiens OX=9606 GN=NPHP3 PE=1 SV=1	Q7Z494	999	Q7Z494_K999	54.598	VAQSLHQLASVYVQWK(1)K	3	-2.0924
sp|Q7Z4V5|HDGR2_HUMAN Hepatoma-derived growth factor-related protein 2 OS=Homo sapiens OX=9606 GN=HDGFL2 PE=1 SV=1	Q7Z4V5	410	Q7Z4V5_K410	141.07	EAK(1)K(1)SAK(0.871)K(0.129)PQSSSTEPAR	2	-0.16175
sp|Q7Z4V5|HDGR2_HUMAN Hepatoma-derived growth factor-related protein 2 OS=Homo sapiens OX=9606 GN=HDGFL2 PE=1 SV=1	Q7Z4V5	411	Q7Z4V5_K411	141.07	EAK(1)K(1)SAK(0.871)K(0.129)PQSSSTEPAR	2	-0.16175
sp|Q7Z4V5|HDGR2_HUMAN Hepatoma-derived growth factor-related protein 2 OS=Homo sapiens OX=9606 GN=HDGFL2 PE=1 SV=1	Q7Z4V5	414	Q7Z4V5_K414	141.07	EAK(0.972)K(0.833)SAK(0.983)K(0.213)PQSSSTEPAR	3	0.13645
sp|Q7Z4V5|HDGR2_HUMAN Hepatoma-derived growth factor-related protein 2 OS=Homo sapiens OX=9606 GN=HDGFL2 PE=1 SV=1	Q7Z4V5	278	Q7Z4V5_K278	71.03	GRK(1)PAEKPLPK	3	-0.9488
sp|Q7Z5M5|TMC3_HUMAN Transmembrane channel-like protein 3 OS=Homo sapiens OX=9606 GN=TMC3 PE=2 SV=3	Q7Z5M5	307	Q7Z5M5_K307	47.64	K(1)K(1)SK(1)NLAVTICLR	3	-3.5666
sp|Q7Z5M5|TMC3_HUMAN Transmembrane channel-like protein 3 OS=Homo sapiens OX=9606 GN=TMC3 PE=2 SV=3	Q7Z5M5	308	Q7Z5M5_K308	47.64	K(1)K(1)SK(1)NLAVTICLR	3	-3.5666
sp|Q7Z5M5|TMC3_HUMAN Transmembrane channel-like protein 3 OS=Homo sapiens OX=9606 GN=TMC3 PE=2 SV=3	Q7Z5M5	310	Q7Z5M5_K310	47.64	K(1)K(1)SK(1)NLAVTICLR	3	-3.5666
sp|Q86TG7|PEG10_HUMAN Retrotransposon-derived protein PEG10 OS=Homo sapiens OX=9606 GN=PEG10 PE=1 SV=2	Q86TG7	249	Q86TG7_K249	41.378	RLARAAAARK(1)PRSPPR	4	1.0634
sp|Q86VS8|HOOK3_HUMAN Protein Hook homolog 3 OS=Homo sapiens OX=9606 GN=HOOK3 PE=1 SV=2	Q86VS8	592	Q86VS8_K592	80.755	K(1)K(1)EEEMKQMEER	2	3.9804
sp|Q86VS8|HOOK3_HUMAN Protein Hook homolog 3 OS=Homo sapiens OX=9606 GN=HOOK3 PE=1 SV=2	Q86VS8	593	Q86VS8_K593	80.755	K(1)K(1)EEEMKQMEER	2	3.9804
sp|Q86XP3|DDX42_HUMAN ATP-dependent RNA helicase DDX42 OS=Homo sapiens OX=9606 GN=DDX42 PE=1 SV=1	Q86XP3	930	Q86XP3_K930	73.067	TADGFAVPEPPK(1)R	2	0.82143
sp|Q8IW40|CC103_HUMAN Coiled-coil domain-containing protein 103 OS=Homo sapiens OX=9606 GN=CCDC103 PE=1 SV=1	Q8IW40	68	Q8IW40_K68	43.083	DK(0.001)MGGK(0.999)R	1	1.9245
sp|Q8IWU9|TPH2_HUMAN Tryptophan 5-hydroxylase 2 OS=Homo sapiens OX=9606 GN=TPH2 PE=1 SV=1	Q8IWU9	388	Q8IWU9_K388	40.104	AYGAGLLSSIGELK(0.991)HALSDK(0.004)ACVK(0.005)AFDPK	3	-0.24355
sp|Q8IXQ4|GPAM1_HUMAN GPALPP motifs-containing protein 1 OS=Homo sapiens OX=9606 GN=GPALPP1 PE=1 SV=1	Q8IXQ4	317	Q8IXQ4_K317	84.365	FDEAQK(1)K(1)ALIK(1)K	2	1.4576
sp|Q8IXQ4|GPAM1_HUMAN GPALPP motifs-containing protein 1 OS=Homo sapiens OX=9606 GN=GPALPP1 PE=1 SV=1	Q8IXQ4	318	Q8IXQ4_K318	84.365	FDEAQK(1)K(1)ALIK(1)K	2	1.4576
sp|Q8IXQ4|GPAM1_HUMAN GPALPP motifs-containing protein 1 OS=Homo sapiens OX=9606 GN=GPALPP1 PE=1 SV=1	Q8IXQ4	322	Q8IXQ4_K322	84.365	FDEAQK(1)K(1)ALIK(1)K	2	1.4576
sp|Q8IXW5|RPAP2_HUMAN Putative RNA polymerase II subunit B1 CTD phosphatase RPAP2 OS=Homo sapiens OX=9606 GN=RPAP2 PE=1 SV=1	Q8IXW5	250	Q8IXW5_K250	45.614	SIMK(0.161)K(0.832)K(0.178)AGHK(0.841)ANSK(0.987)HK	3	-4.481
sp|Q8IXW5|RPAP2_HUMAN Putative RNA polymerase II subunit B1 CTD phosphatase RPAP2 OS=Homo sapiens OX=9606 GN=RPAP2 PE=1 SV=1	Q8IXW5	255	Q8IXW5_K255	45.614	SIMK(0.161)K(0.832)K(0.178)AGHK(0.841)ANSK(0.987)HK	3	-4.481
sp|Q8IXW5|RPAP2_HUMAN Putative RNA polymerase II subunit B1 CTD phosphatase RPAP2 OS=Homo sapiens OX=9606 GN=RPAP2 PE=1 SV=1	Q8IXW5	259	Q8IXW5_K259	45.614	SIMK(0.161)K(0.832)K(0.178)AGHK(0.841)ANSK(0.987)HK	3	-4.481
sp|Q8IY57|YAF2_HUMAN YY1-associated factor 2 OS=Homo sapiens OX=9606 GN=YAF2 PE=1 SV=3	Q8IY57	75	Q8IY57_K75	84.674	PVSQLVAQQVTQQFVPPTQSK(1)K	3	-0.26027
sp|Q8IY57|YAF2_HUMAN YY1-associated factor 2 OS=Homo sapiens OX=9606 GN=YAF2 PE=1 SV=3	Q8IY57	76	Q8IY57_K76	45.558	PVSQLVAQQVTQQFVPPTQSK(0.53)K(0.867)EK(0.867)K(0.867)DK(0.869)VEK	4	0.53103
sp|Q8IY57|YAF2_HUMAN YY1-associated factor 2 OS=Homo sapiens OX=9606 GN=YAF2 PE=1 SV=3	Q8IY57	78	Q8IY57_K78	45.558	PVSQLVAQQVTQQFVPPTQSK(0.53)K(0.867)EK(0.867)K(0.867)DK(0.869)VEK	4	0.53103
sp|Q8IY57|YAF2_HUMAN YY1-associated factor 2 OS=Homo sapiens OX=9606 GN=YAF2 PE=1 SV=3	Q8IY57	79	Q8IY57_K79	45.558	PVSQLVAQQVTQQFVPPTQSK(0.53)K(0.867)EK(0.867)K(0.867)DK(0.869)VEK	4	0.53103
sp|Q8IY57|YAF2_HUMAN YY1-associated factor 2 OS=Homo sapiens OX=9606 GN=YAF2 PE=1 SV=3	Q8IY57	81	Q8IY57_K81	45.558	PVSQLVAQQVTQQFVPPTQSK(0.53)K(0.867)EK(0.867)K(0.867)DK(0.869)VEK	4	0.53103
sp|Q8IYB3|SRRM1_HUMAN Serine/arginine repetitive matrix protein 1 OS=Homo sapiens OX=9606 GN=SRRM1 PE=1 SV=2	Q8IYB3	145	Q8IYB3_K145	171.26	LASMK(1)K(1)QDEDKDKR	2	-2.1941
sp|Q8IYB3|SRRM1_HUMAN Serine/arginine repetitive matrix protein 1 OS=Homo sapiens OX=9606 GN=SRRM1 PE=1 SV=2	Q8IYB3	146	Q8IYB3_K146	171.26	LASMK(1)K(1)QDEDKDKR	2	-2.1941
sp|Q8IYX0|ZN679_HUMAN Zinc finger protein 679 OS=Homo sapiens OX=9606 GN=ZNF679 PE=1 SV=2	Q8IYX0	181	Q8IYX0_K181	51.727	TRHTGK(0.513)K(0.513)HFK(0.781)CK(0.235)K(0.959)YGK	2	1.483
sp|Q8IYX0|ZN679_HUMAN Zinc finger protein 679 OS=Homo sapiens OX=9606 GN=ZNF679 PE=1 SV=2	Q8IYX0	182	Q8IYX0_K182	51.727	TRHTGK(0.513)K(0.513)HFK(0.781)CK(0.235)K(0.959)YGK	2	1.483
sp|Q8IYX0|ZN679_HUMAN Zinc finger protein 679 OS=Homo sapiens OX=9606 GN=ZNF679 PE=1 SV=2	Q8IYX0	185	Q8IYX0_K185	51.727	TRHTGK(0.513)K(0.513)HFK(0.781)CK(0.235)K(0.959)YGK	2	1.483
sp|Q8IYX0|ZN679_HUMAN Zinc finger protein 679 OS=Homo sapiens OX=9606 GN=ZNF679 PE=1 SV=2	Q8IYX0	188	Q8IYX0_K188	51.727	TRHTGK(0.513)K(0.513)HFK(0.781)CK(0.235)K(0.959)YGK	2	1.483
sp|Q8N309|LRC43_HUMAN Leucine-rich repeat-containing protein 43 OS=Homo sapiens OX=9606 GN=LRRC43 PE=2 SV=2	Q8N309	606	Q8N309_K606	74.301	DSK(1)K(1)IK(1)K(1)VAK	2	1.1971
sp|Q8N309|LRC43_HUMAN Leucine-rich repeat-containing protein 43 OS=Homo sapiens OX=9606 GN=LRRC43 PE=2 SV=2	Q8N309	607	Q8N309_K607	74.301	DSK(1)K(1)IK(1)K(1)VAK	2	1.1971
sp|Q8N309|LRC43_HUMAN Leucine-rich repeat-containing protein 43 OS=Homo sapiens OX=9606 GN=LRRC43 PE=2 SV=2	Q8N309	609	Q8N309_K609	74.301	DSK(1)K(1)IK(1)K(1)VAK	2	1.1971
sp|Q8N309|LRC43_HUMAN Leucine-rich repeat-containing protein 43 OS=Homo sapiens OX=9606 GN=LRRC43 PE=2 SV=2	Q8N309	610	Q8N309_K610	74.301	DSK(1)K(1)IK(1)K(1)VAK	2	1.1971
sp|Q8N488|RYBP_HUMAN RING1 and YY1-binding protein OS=Homo sapiens OX=9606 GN=RYBP PE=1 SV=2	Q8N488	77	Q8N488_K77	63.69	INSQLVAQQVAQQYATPPPPK(1)K	3	-1.4097
sp|Q8N5F7|NKAP_HUMAN NF-kappa-B-activating protein OS=Homo sapiens OX=9606 GN=NKAP PE=1 SV=1	Q8N5F7	396	Q8N5F7_K396	68.224	ENK(1)ILASFR	2	-0.61984
sp|Q8N8U9|BMPER_HUMAN BMP-binding endothelial regulator protein OS=Homo sapiens OX=9606 GN=BMPER PE=1 SV=3	Q8N8U9	673	Q8N8U9_K673	47.088	PCVAGCHCPANLVLHK(1)GR	3	4.2265
sp|Q8NB66|UN13C_HUMAN Protein unc-13 homolog C OS=Homo sapiens OX=9606 GN=UNC13C PE=2 SV=3	Q8NB66	25	Q8NB66_K25	70.438	K(1)LGNTNK(0.5)NK(0.5)EYRQQK	3	-0.91293
sp|Q8NB66|UN13C_HUMAN Protein unc-13 homolog C OS=Homo sapiens OX=9606 GN=UNC13C PE=2 SV=3	Q8NB66	31	Q8NB66_K31	70.438	K(1)LGNTNK(0.5)NK(0.5)EYRQQK	3	-0.91293
sp|Q8NB66|UN13C_HUMAN Protein unc-13 homolog C OS=Homo sapiens OX=9606 GN=UNC13C PE=2 SV=3	Q8NB66	33	Q8NB66_K33	70.438	K(1)LGNTNK(0.5)NK(0.5)EYRQQK	3	-0.91293
sp|Q8NC51|SERB1_HUMAN SERPINE1 mRNA-binding protein 1 OS=Homo sapiens OX=9606 GN=SERBP1 PE=1 SV=2	Q8NC51	102	Q8NC51_K102	68.481	EETQPPVALK(1)K(1)EGIR	2	-1.2583
sp|Q8NC51|SERB1_HUMAN SERPINE1 mRNA-binding protein 1 OS=Homo sapiens OX=9606 GN=SERBP1 PE=1 SV=2	Q8NC51	103	Q8NC51_K103	68.481	EETQPPVALK(1)K(1)EGIR	2	-1.2583
sp|Q8NC51|SERB1_HUMAN SERPINE1 mRNA-binding protein 1 OS=Homo sapiens OX=9606 GN=SERBP1 PE=1 SV=2	Q8NC51	68	Q8NC51_K68	107.39	SAAQAAAQTNSNAAGK(1)QLR	2	-0.40954
sp|Q8NCM8|DYHC2_HUMAN Cytoplasmic dynein 2 heavy chain 1 OS=Homo sapiens OX=9606 GN=DYNC2H1 PE=1 SV=4	Q8NCM8	2886	Q8NCM8_K2886	60.255	YMTFLHVYSAISSSK(1)K(1)K	2	2.3214
sp|Q8NCM8|DYHC2_HUMAN Cytoplasmic dynein 2 heavy chain 1 OS=Homo sapiens OX=9606 GN=DYNC2H1 PE=1 SV=4	Q8NCM8	2887	Q8NCM8_K2887	60.255	YMTFLHVYSAISSSK(1)K(1)K	2	2.3214
sp|Q8NDD1|CA131_HUMAN Uncharacterized protein C1orf131 OS=Homo sapiens OX=9606 GN=C1orf131 PE=1 SV=4	Q8NDD1	205	Q8NDD1_K205	86.344	AIMLGAK(0.002)PPK(0.999)K(1)SYVNYK	2	-1.2215
sp|Q8NDD1|CA131_HUMAN Uncharacterized protein C1orf131 OS=Homo sapiens OX=9606 GN=C1orf131 PE=1 SV=4	Q8NDD1	206	Q8NDD1_K206	86.344	AIMLGAK(0.002)PPK(0.999)K(1)SYVNYK	2	-1.2215
sp|Q8NDD1|CA131_HUMAN Uncharacterized protein C1orf131 OS=Homo sapiens OX=9606 GN=C1orf131 PE=1 SV=4	Q8NDD1	239	Q8NDD1_K239	69.451	LAQETDIFK(1)K(1)K	1	-1.4244
sp|Q8NDD1|CA131_HUMAN Uncharacterized protein C1orf131 OS=Homo sapiens OX=9606 GN=C1orf131 PE=1 SV=4	Q8NDD1	240	Q8NDD1_K240	69.451	LAQETDIFK(1)K(1)K	1	-1.4244
sp|Q8NDH2|CC168_HUMAN Leucine-rich repeat transmembrane protein CCDC168 OS=Homo sapiens OX=9606 GN=CCDC168 PE=2 SV=3	Q8NDH2	202	Q8NDH2_K202	52.937	K(0.001)LFSMMK(0.999)TNK	2	-0.86228
sp|Q8NE71|ABCF1_HUMAN ATP-binding cassette sub-family F member 1 OS=Homo sapiens OX=9606 GN=ABCF1 PE=1 SV=2	Q8NE71	556	Q8NE71_K556	43.261	QEK(0.865)K(0.124)LK(0.059)ELK(0.135)AGGK(0.632)STK(0.185)QAEK	3	2.0812
sp|Q8NE71|ABCF1_HUMAN ATP-binding cassette sub-family F member 1 OS=Homo sapiens OX=9606 GN=ABCF1 PE=1 SV=2	Q8NE71	566	Q8NE71_K566	43.261	QEK(0.865)K(0.124)LK(0.059)ELK(0.135)AGGK(0.632)STK(0.185)QAEK	3	2.0812
sp|Q8NEH6|MNS1_HUMAN Meiosis-specific nuclear structural protein 1 OS=Homo sapiens OX=9606 GN=MNS1 PE=1 SV=2	Q8NEH6	342	Q8NEH6_K342	68.626	LKEEAEK(1)K(1)LRK	2	0.87143
sp|Q8NEH6|MNS1_HUMAN Meiosis-specific nuclear structural protein 1 OS=Homo sapiens OX=9606 GN=MNS1 PE=1 SV=2	Q8NEH6	343	Q8NEH6_K343	68.626	LKEEAEK(1)K(1)LRK	2	0.87143
sp|Q8NEU8|DP13B_HUMAN DCC-interacting protein 13-beta OS=Homo sapiens OX=9606 GN=APPL2 PE=1 SV=3	Q8NEU8	153	Q8NEU8_K153	52.247	LPK(0.164)K(0.711)K(0.145)ENEK(0.983)VK(0.997)TEVGK	2	-2.4914
sp|Q8NEU8|DP13B_HUMAN DCC-interacting protein 13-beta OS=Homo sapiens OX=9606 GN=APPL2 PE=1 SV=3	Q8NEU8	158	Q8NEU8_K158	52.247	LPK(0.164)K(0.711)K(0.145)ENEK(0.983)VK(0.997)TEVGK	2	-2.4914
sp|Q8NEU8|DP13B_HUMAN DCC-interacting protein 13-beta OS=Homo sapiens OX=9606 GN=APPL2 PE=1 SV=3	Q8NEU8	160	Q8NEU8_K160	52.247	LPK(0.164)K(0.711)K(0.145)ENEK(0.983)VK(0.997)TEVGK	2	-2.4914
sp|Q8NHG7|SVIP_HUMAN Small VCP/p97-interacting protein OS=Homo sapiens OX=9606 GN=SVIP PE=1 SV=1	Q8NHG7	50	Q8NHG7_K50	55.383	EAASRGILDVQSVQEK(0.482)RK(0.482)K(0.141)K(0.896)EK	3	4.0491
sp|Q8NHG7|SVIP_HUMAN Small VCP/p97-interacting protein OS=Homo sapiens OX=9606 GN=SVIP PE=1 SV=1	Q8NHG7	52	Q8NHG7_K52	55.383	EAASRGILDVQSVQEK(0.482)RK(0.482)K(0.141)K(0.896)EK	3	4.0491
sp|Q8NHG7|SVIP_HUMAN Small VCP/p97-interacting protein OS=Homo sapiens OX=9606 GN=SVIP PE=1 SV=1	Q8NHG7	54	Q8NHG7_K54	55.383	EAASRGILDVQSVQEK(0.482)RK(0.482)K(0.141)K(0.896)EK	3	4.0491
sp|Q8NI27|THOC2_HUMAN THO complex subunit 2 OS=Homo sapiens OX=9606 GN=THOC2 PE=1 SV=2	Q8NI27	1304	Q8NI27_K1304	76.051	EK(0.004)PK(0.996)EERPNK(1)DEK	3	-0.27444
sp|Q8NI27|THOC2_HUMAN THO complex subunit 2 OS=Homo sapiens OX=9606 GN=THOC2 PE=1 SV=2	Q8NI27	1310	Q8NI27_K1310	76.051	EK(0.004)PK(0.996)EERPNK(1)DEK	3	-0.27444
sp|Q8TAC9|SCAM5_HUMAN Secretory carrier-associated membrane protein 5 OS=Homo sapiens OX=9606 GN=SCAMP5 PE=1 SV=1	Q8TAC9	4	Q8TAC9_K4	68.846	AEK(1)VNNFPPLPK	2	-3.6302
sp|Q8TAF5|LQK1_HUMAN Putative uncharacterized protein LQK1 OS=Homo sapiens OX=9606 GN=FLVCR1-DT PE=5 SV=1	Q8TAF5	40	Q8TAF5_K40	53.869	PQERVLGSTSGK(1)NWRRVTER	2	4.353
sp|Q8TAQ2|SMRC2_HUMAN SWI/SNF complex subunit SMARCC2 OS=Homo sapiens OX=9606 GN=SMARCC2 PE=1 SV=1	Q8TAQ2	313	Q8TAQ2_K313	49.343	K(1)K(1)NAK(1)K(1)GPSTPYTK(1)SK(1)R	3	1.0971
sp|Q8TAQ2|SMRC2_HUMAN SWI/SNF complex subunit SMARCC2 OS=Homo sapiens OX=9606 GN=SMARCC2 PE=1 SV=1	Q8TAQ2	314	Q8TAQ2_K314	49.343	K(1)K(1)NAK(1)K(1)GPSTPYTK(1)SK(1)R	3	1.0971
sp|Q8TAQ2|SMRC2_HUMAN SWI/SNF complex subunit SMARCC2 OS=Homo sapiens OX=9606 GN=SMARCC2 PE=1 SV=1	Q8TAQ2	317	Q8TAQ2_K317	49.343	K(1)K(1)NAK(1)K(1)GPSTPYTK(1)SK(1)R	3	1.0971
sp|Q8TAQ2|SMRC2_HUMAN SWI/SNF complex subunit SMARCC2 OS=Homo sapiens OX=9606 GN=SMARCC2 PE=1 SV=1	Q8TAQ2	318	Q8TAQ2_K318	49.343	K(1)K(1)NAK(1)K(1)GPSTPYTK(1)SK(1)R	3	1.0971
sp|Q8TAQ2|SMRC2_HUMAN SWI/SNF complex subunit SMARCC2 OS=Homo sapiens OX=9606 GN=SMARCC2 PE=1 SV=1	Q8TAQ2	326	Q8TAQ2_K326	49.343	K(1)K(1)NAK(1)K(1)GPSTPYTK(1)SK(1)R	3	1.0971
sp|Q8TAQ2|SMRC2_HUMAN SWI/SNF complex subunit SMARCC2 OS=Homo sapiens OX=9606 GN=SMARCC2 PE=1 SV=1	Q8TAQ2	328	Q8TAQ2_K328	49.343	K(1)K(1)NAK(1)K(1)GPSTPYTK(1)SK(1)R	3	1.0971
sp|Q8TD26|CHD6_HUMAN Chromodomain-helicase-DNA-binding protein 6 OS=Homo sapiens OX=9606 GN=CHD6 PE=1 SV=4	Q8TD26	132	Q8TD26_K132	61.435	K(0.979)AK(0.925)EPK(0.227)K(0.874)AK(0.996)EHK(0.999)EPK	2	0.99722
sp|Q8TD26|CHD6_HUMAN Chromodomain-helicase-DNA-binding protein 6 OS=Homo sapiens OX=9606 GN=CHD6 PE=1 SV=4	Q8TD26	134	Q8TD26_K134	61.435	K(0.979)AK(0.925)EPK(0.227)K(0.874)AK(0.996)EHK(0.999)EPK	2	0.99722
sp|Q8TD26|CHD6_HUMAN Chromodomain-helicase-DNA-binding protein 6 OS=Homo sapiens OX=9606 GN=CHD6 PE=1 SV=4	Q8TD26	138	Q8TD26_K138	61.435	K(0.979)AK(0.925)EPK(0.227)K(0.874)AK(0.996)EHK(0.999)EPK	2	0.99722
sp|Q8TD26|CHD6_HUMAN Chromodomain-helicase-DNA-binding protein 6 OS=Homo sapiens OX=9606 GN=CHD6 PE=1 SV=4	Q8TD26	140	Q8TD26_K140	61.435	K(0.979)AK(0.925)EPK(0.227)K(0.874)AK(0.996)EHK(0.999)EPK	2	0.99722
sp|Q8TD26|CHD6_HUMAN Chromodomain-helicase-DNA-binding protein 6 OS=Homo sapiens OX=9606 GN=CHD6 PE=1 SV=4	Q8TD26	143	Q8TD26_K143	61.435	K(0.979)AK(0.925)EPK(0.227)K(0.874)AK(0.996)EHK(0.999)EPK	2	0.99722
sp|Q8TDI0|CHD5_HUMAN Chromodomain-helicase-DNA-binding protein 5 OS=Homo sapiens OX=9606 GN=CHD5 PE=1 SV=1	Q8TDI0	109	Q8TDI0_K109	94.662	DKKEK(1)K(1)AK	2	4.4867
sp|Q8TDI0|CHD5_HUMAN Chromodomain-helicase-DNA-binding protein 5 OS=Homo sapiens OX=9606 GN=CHD5 PE=1 SV=1	Q8TDI0	110	Q8TDI0_K110	94.662	DKKEK(1)K(1)AK	2	4.4867
sp|Q8TDN6|BRX1_HUMAN Ribosome biogenesis protein BRX1 homolog OS=Homo sapiens OX=9606 GN=BRIX1 PE=1 SV=2	Q8TDN6	17	Q8TDN6_K17	70.889	GGFAVQAK(0.827)K(0.175)PK(0.998)R	3	0.47843
sp|Q8TDN6|BRX1_HUMAN Ribosome biogenesis protein BRX1 homolog OS=Homo sapiens OX=9606 GN=BRIX1 PE=1 SV=2	Q8TDN6	20	Q8TDN6_K20	70.889	GGFAVQAK(0.827)K(0.175)PK(0.998)R	3	0.47843
sp|Q8TDN6|BRX1_HUMAN Ribosome biogenesis protein BRX1 homolog OS=Homo sapiens OX=9606 GN=BRIX1 PE=1 SV=2	Q8TDN6	326	Q8TDN6_K326	41.491	TLLPHDPTADVFVTPAEEK(0.062)PIEIQWVK(0.134)PEPK(0.804)VDLK	4	0.49412
sp|Q8WUF8|ARB2A_HUMAN Cotranscriptional regulator ARB2A OS=Homo sapiens OX=9606 GN=ARB2A PE=1 SV=1	Q8WUF8	230	Q8WUF8_K230	64.103	ERK(1)DK(1)VSK(0.219)ETK(0.781)K	3	2.419
sp|Q8WUF8|ARB2A_HUMAN Cotranscriptional regulator ARB2A OS=Homo sapiens OX=9606 GN=ARB2A PE=1 SV=1	Q8WUF8	232	Q8WUF8_K232	64.103	ERK(1)DK(1)VSK(0.219)ETK(0.781)K	3	2.419
sp|Q8WUF8|ARB2A_HUMAN Cotranscriptional regulator ARB2A OS=Homo sapiens OX=9606 GN=ARB2A PE=1 SV=1	Q8WUF8	238	Q8WUF8_K238	64.103	ERK(1)DK(1)VSK(0.219)ETK(0.781)K	3	2.419
sp|Q8WV28|BLNK_HUMAN B-cell linker protein OS=Homo sapiens OX=9606 GN=BLNK PE=1 SV=2	Q8WV28	20	Q8WV28_K20	51.286	LRQLQK(1)MVHDIK	3	-2.3813
sp|Q8WWY3|PRP31_HUMAN U4/U6 small nuclear ribonucleoprotein Prp31 OS=Homo sapiens OX=9606 GN=PRPF31 PE=1 SV=2	Q8WWY3	401	Q8WWY3_K401	59.954	MSFGEIEEDAYQEDLGFSLGHLGK(1)SGSGR	3	1.059
sp|Q8WWY3|PRP31_HUMAN U4/U6 small nuclear ribonucleoprotein Prp31 OS=Homo sapiens OX=9606 GN=PRPF31 PE=1 SV=2	Q8WWY3	338	Q8WWY3_K338	88.09	WQEPPPVK(0.999)QVK(0.001)PLPAPLDGQR	3	-1.5302
sp|Q8WXX5|DNJC9_HUMAN DnaJ homolog subfamily C member 9 OS=Homo sapiens OX=9606 GN=DNAJC9 PE=1 SV=1	Q8WXX5	217	Q8WXX5_K217	153.32	ELGLDEGVDSLK(1)AAIQSR	3	0.77149
sp|Q8WY36|BBX_HUMAN HMG box transcription factor BBX OS=Homo sapiens OX=9606 GN=BBX PE=1 SV=1	Q8WY36	536	Q8WY36_K536	46.3	EK(0.997)K(0.687)MSK(0.687)EK(0.62)SSDTTK(0.01)ESR	3	-2.8087
sp|Q8WY36|BBX_HUMAN HMG box transcription factor BBX OS=Homo sapiens OX=9606 GN=BBX PE=1 SV=1	Q8WY36	537	Q8WY36_K537	46.3	EK(0.997)K(0.687)MSK(0.687)EK(0.62)SSDTTK(0.01)ESR	3	-2.8087
sp|Q8WY36|BBX_HUMAN HMG box transcription factor BBX OS=Homo sapiens OX=9606 GN=BBX PE=1 SV=1	Q8WY36	540	Q8WY36_K540	46.3	EK(0.997)K(0.687)MSK(0.687)EK(0.62)SSDTTK(0.01)ESR	3	-2.8087
sp|Q92522|H1X_HUMAN Histone H1.10 OS=Homo sapiens OX=9606 GN=H1-10 PE=1 SV=1	Q92522	143	Q92522_K143	50.827	GAPAAATAPAPTAHK(1)AK	3	-0.33862
sp|Q92522|H1X_HUMAN Histone H1.10 OS=Homo sapiens OX=9606 GN=H1-10 PE=1 SV=1	Q92522	207	Q92522_K207	64.439	PSVPK(1)VPK(1)GR	2	0.65623
sp|Q92522|H1X_HUMAN Histone H1.10 OS=Homo sapiens OX=9606 GN=H1-10 PE=1 SV=1	Q92522	210	Q92522_K210	64.439	PSVPK(1)VPK(1)GR	2	0.65623
sp|Q92545|TM131_HUMAN Transmembrane protein 131 OS=Homo sapiens OX=9606 GN=TMEM131 PE=1 SV=3	Q92545	1396	Q92545_K1396	54.611	K(1)QEEK(1)EK(1)K(1)GK	2	-1.1387
sp|Q92545|TM131_HUMAN Transmembrane protein 131 OS=Homo sapiens OX=9606 GN=TMEM131 PE=1 SV=3	Q92545	1400	Q92545_K1400	54.611	K(1)QEEK(1)EK(1)K(1)GK	2	-1.1387
sp|Q92545|TM131_HUMAN Transmembrane protein 131 OS=Homo sapiens OX=9606 GN=TMEM131 PE=1 SV=3	Q92545	1402	Q92545_K1402	54.611	K(1)QEEK(1)EK(1)K(1)GK	2	-1.1387
sp|Q92545|TM131_HUMAN Transmembrane protein 131 OS=Homo sapiens OX=9606 GN=TMEM131 PE=1 SV=3	Q92545	1403	Q92545_K1403	54.611	K(1)QEEK(1)EK(1)K(1)GK	2	-1.1387
sp|Q92954|PRG4_HUMAN Proteoglycan 4 OS=Homo sapiens OX=9606 GN=PRG4 PE=1 SV=3	Q92954	199	Q92954_K199	83.753	K(0.001)LK(0.999)VK(1)DNK	2	0.61402
sp|Q92954|PRG4_HUMAN Proteoglycan 4 OS=Homo sapiens OX=9606 GN=PRG4 PE=1 SV=3	Q92954	201	Q92954_K201	83.753	K(0.001)LK(0.999)VK(1)DNK	2	0.61402
sp|Q93079|H2B1H_HUMAN Histone H2B type 1-H OS=Homo sapiens OX=9606 GN=H2BC9 PE=1 SV=3;sp|Q5QNW6|H2B2F_HUMAN Histone H2B type 2-F OS=Homo sapiens OX=9606 GN=H2BC18 PE=1 SV=3	Q93079	12	Q93079_K12	87.669	SAPAPK(1)K(1)GSK(1)K(1)AVTK(1)AQK(1)K	2	-1.1843
sp|Q93079|H2B1H_HUMAN Histone H2B type 1-H OS=Homo sapiens OX=9606 GN=H2BC9 PE=1 SV=3;sp|Q5QNW6|H2B2F_HUMAN Histone H2B type 2-F OS=Homo sapiens OX=9606 GN=H2BC18 PE=1 SV=3	Q93079	13	Q93079_K13	87.669	SAPAPK(1)K(1)GSK(1)K(1)AVTK(1)AQK(1)K	2	-1.1843
sp|Q96AA8|JKIP2_HUMAN Janus kinase and microtubule-interacting protein 2 OS=Homo sapiens OX=9606 GN=JAKMIP2 PE=1 SV=1	Q96AA8	350	Q96AA8_K350	69.258	MEEK(0.852)LK(0.148)AVTKENSEMR	3	-1.3509
sp|Q96BK5|PINX1_HUMAN PIN2/TERF1-interacting telomerase inhibitor 1 OS=Homo sapiens OX=9606 GN=PINX1 PE=1 SV=2	Q96BK5	231	Q96BK5_K231	108.37	DVESYLQPK(1)AK(1)R	2	0.11049
sp|Q96BK5|PINX1_HUMAN PIN2/TERF1-interacting telomerase inhibitor 1 OS=Homo sapiens OX=9606 GN=PINX1 PE=1 SV=2	Q96BK5	233	Q96BK5_K233	108.37	DVESYLQPK(1)AK(1)R	2	0.11049
sp|Q96C01|F136A_HUMAN Protein FAM136A OS=Homo sapiens OX=9606 GN=FAM136A PE=1 SV=1	Q96C01	27	Q96C01_K27	50.831	SLERENIRK(1)MQGLMFR	3	1.1119
sp|Q96CN9|GCC1_HUMAN GRIP and coiled-coil domain-containing protein 1 OS=Homo sapiens OX=9606 GN=GCC1 PE=1 SV=1	Q96CN9	663	Q96CN9_K663	85.355	K(1)EVEITSLRK(0.5)QK(0.5)HR	2	3.5164
sp|Q96CN9|GCC1_HUMAN GRIP and coiled-coil domain-containing protein 1 OS=Homo sapiens OX=9606 GN=GCC1 PE=1 SV=1	Q96CN9	672	Q96CN9_K672	85.355	K(1)EVEITSLRK(0.5)QK(0.5)HR	2	3.5164
sp|Q96CN9|GCC1_HUMAN GRIP and coiled-coil domain-containing protein 1 OS=Homo sapiens OX=9606 GN=GCC1 PE=1 SV=1	Q96CN9	674	Q96CN9_K674	85.355	K(1)EVEITSLRK(0.5)QK(0.5)HR	2	3.5164
sp|Q96CT7|CC124_HUMAN Coiled-coil domain-containing protein 124 OS=Homo sapiens OX=9606 GN=CCDC124 PE=1 SV=1	Q96CT7	23	Q96CT7_K23	72.434	RAEAK(1)AAADAK	2	0.46467
sp|Q96EY8|MMAB_HUMAN Corrinoid adenosyltransferase MMAB OS=Homo sapiens OX=9606 GN=MMAB PE=1 SV=1	Q96EY8	57	Q96EY8_K57	41.166	TPRIPK(0.987)IYTK(0.007)TGDK(0.007)GFSSTFTGERR	3	1.6976
sp|Q96G25|MED8_HUMAN Mediator of RNA polymerase II transcription subunit 8 OS=Homo sapiens OX=9606 GN=MED8 PE=1 SV=2	Q96G25	153	Q96G25_K153	59.067	MCSNLLEK(1)ISK(1)EER	2	-4.4435
sp|Q96G25|MED8_HUMAN Mediator of RNA polymerase II transcription subunit 8 OS=Homo sapiens OX=9606 GN=MED8 PE=1 SV=2	Q96G25	156	Q96G25_K156	59.067	MCSNLLEK(1)ISK(1)EER	2	-4.4435
sp|Q96GQ7|DDX27_HUMAN Probable ATP-dependent RNA helicase DDX27 OS=Homo sapiens OX=9606 GN=DDX27 PE=1 SV=2	Q96GQ7	666	Q96GQ7_K666	87.498	IAK(1)ALQEFDLALR	2	1.6194
sp|Q96GQ7|DDX27_HUMAN Probable ATP-dependent RNA helicase DDX27 OS=Homo sapiens OX=9606 GN=DDX27 PE=1 SV=2	Q96GQ7	757	Q96GQ7_K757	86.288	SVFDEELTNTSK(1)K(1)ALK(1)QYR	2	-1.3095
sp|Q96GQ7|DDX27_HUMAN Probable ATP-dependent RNA helicase DDX27 OS=Homo sapiens OX=9606 GN=DDX27 PE=1 SV=2	Q96GQ7	758	Q96GQ7_K758	86.288	SVFDEELTNTSK(1)K(1)ALK(1)QYR	2	-1.3095
sp|Q96GQ7|DDX27_HUMAN Probable ATP-dependent RNA helicase DDX27 OS=Homo sapiens OX=9606 GN=DDX27 PE=1 SV=2	Q96GQ7	761	Q96GQ7_K761	86.288	SVFDEELTNTSK(1)K(1)ALK(1)QYR	2	-1.3095
sp|Q96M91|CFA53_HUMAN Cilia- and flagella-associated protein 53 OS=Homo sapiens OX=9606 GN=CFAP53 PE=1 SV=2	Q96M91	370	Q96M91_K370	65.563	AQEKEFDRILEEDK(0.003)AK(0.997)K	2	2.7189
sp|Q96MT7|CFA44_HUMAN Cilia- and flagella-associated protein 44 OS=Homo sapiens OX=9606 GN=CFAP44 PE=1 SV=2	Q96MT7	1734	Q96MT7_K1734	71.296	K(1)ELANAK	1	-0.5959
sp|Q96NN9|AIFM3_HUMAN Apoptosis-inducing factor 3 OS=Homo sapiens OX=9606 GN=AIFM3 PE=1 SV=1	Q96NN9	9	Q96NN9_K9	63.091	PK(1)PVELK(1)IEVVLPEK(1)ER	2	2.3625
sp|Q96NN9|AIFM3_HUMAN Apoptosis-inducing factor 3 OS=Homo sapiens OX=9606 GN=AIFM3 PE=1 SV=1	Q96NN9	14	Q96NN9_K14	63.091	PK(1)PVELK(1)IEVVLPEK(1)ER	2	2.3625
sp|Q96NN9|AIFM3_HUMAN Apoptosis-inducing factor 3 OS=Homo sapiens OX=9606 GN=AIFM3 PE=1 SV=1	Q96NN9	22	Q96NN9_K22	63.091	PK(1)PVELK(1)IEVVLPEK(1)ER	2	2.3625
sp|Q96QC0|PP1RA_HUMAN Serine/threonine-protein phosphatase 1 regulatory subunit 10 OS=Homo sapiens OX=9606 GN=PPP1R10 PE=1 SV=1	Q96QC0	179	Q96QC0_K179	98.408	TTLPERPLTEVK(1)AETR	2	-0.12274
sp|Q96RJ0|TAAR1_HUMAN Trace amine-associated receptor 1 OS=Homo sapiens OX=9606 GN=TAAR1 PE=2 SV=1	Q96RJ0	316	Q96RJ0_K316	45.084	K(0.055)ALK(0.913)MMLFGK(0.031)IFQKDSSR	3	3.0139
sp|Q99442|SEC62_HUMAN Translocation protein SEC62 OS=Homo sapiens OX=9606 GN=SEC62 PE=1 SV=1	Q99442	96	Q99442_K96	51.76	ALK(0.996)VMK(0.799)MK(0.532)YDK(0.673)DIK(1)K	2	1.2317
sp|Q99442|SEC62_HUMAN Translocation protein SEC62 OS=Homo sapiens OX=9606 GN=SEC62 PE=1 SV=1	Q99442	99	Q99442_K99	51.76	ALK(0.996)VMK(0.799)MK(0.532)YDK(0.673)DIK(1)K	2	1.2317
sp|Q99442|SEC62_HUMAN Translocation protein SEC62 OS=Homo sapiens OX=9606 GN=SEC62 PE=1 SV=1	Q99442	104	Q99442_K104	51.76	ALK(0.996)VMK(0.799)MK(0.532)YDK(0.673)DIK(1)K	2	1.2317
sp|Q99442|SEC62_HUMAN Translocation protein SEC62 OS=Homo sapiens OX=9606 GN=SEC62 PE=1 SV=1	Q99442	107	Q99442_K107	51.76	ALK(0.996)VMK(0.799)MK(0.532)YDK(0.673)DIK(1)K	2	1.2317
sp|Q99547|MPH6_HUMAN M-phase phosphoprotein 6 OS=Homo sapiens OX=9606 GN=MPHOSPH6 PE=1 SV=2	Q99547	127	Q99547_K127	85.958	YETLVGTIGK(1)K(1)FAR	2	0.38069
sp|Q99547|MPH6_HUMAN M-phase phosphoprotein 6 OS=Homo sapiens OX=9606 GN=MPHOSPH6 PE=1 SV=2	Q99547	128	Q99547_K128	85.958	YETLVGTIGK(1)K(1)FAR	2	0.38069
sp|Q99626|CDX2_HUMAN Homeobox protein CDX-2 OS=Homo sapiens OX=9606 GN=CDX2 PE=1 SV=3	Q99626	182	Q99626_K182	121.92	KPAQQSLGSQVK(1)TR	3	-0.16648
sp|Q9BQ61|TRIR_HUMAN Telomerase RNA component interacting RNase OS=Homo sapiens OX=9606 GN=TRIR PE=1 SV=1	Q9BQ61	118	Q9BQ61_K118	101.6	GGPGSTLSFVGK(1)R	2	-0.33258
sp|Q9BQQ7|RTP3_HUMAN Receptor-transporting protein 3 OS=Homo sapiens OX=9606 GN=RTP3 PE=1 SV=1	Q9BQQ7	9	Q9BQQ7_K9	58.831	AGDTEVWK(1)QMFQELMR	2	3.6466
sp|Q9BRS8|LARP6_HUMAN La-related protein 6 OS=Homo sapiens OX=9606 GN=LARP6 PE=1 SV=1	Q9BRS8	287	Q9BRS8_K287	58.676	ENMK(1)AVLIGMK(0.057)PPK(0.472)K(0.472)K	2	2.191
sp|Q9BRS8|LARP6_HUMAN La-related protein 6 OS=Homo sapiens OX=9606 GN=LARP6 PE=1 SV=1	Q9BRS8	297	Q9BRS8_K297	58.676	ENMK(1)AVLIGMK(0.057)PPK(0.472)K(0.472)K	2	2.191
sp|Q9BRS8|LARP6_HUMAN La-related protein 6 OS=Homo sapiens OX=9606 GN=LARP6 PE=1 SV=1	Q9BRS8	298	Q9BRS8_K298	58.676	ENMK(1)AVLIGMK(0.057)PPK(0.472)K(0.472)K	2	2.191
sp|Q9BT09|CNPY3_HUMAN Protein canopy homolog 3 OS=Homo sapiens OX=9606 GN=CNPY3 PE=1 SV=1	Q9BT09	83	Q9BT09_K83	55.189	EVIGTGYGILDQK(1)ASGVK	3	-0.19283
sp|Q9BVP2|GNL3_HUMAN Guanine nucleotide-binding protein-like 3 OS=Homo sapiens OX=9606 GN=GNL3 PE=1 SV=2	Q9BVP2	2	Q9BVP2_K2	89.484	MK(1)RPK(1)LK(1)K(1)ASK(1)R	3	-0.17894
sp|Q9BVP2|GNL3_HUMAN Guanine nucleotide-binding protein-like 3 OS=Homo sapiens OX=9606 GN=GNL3 PE=1 SV=2	Q9BVP2	5	Q9BVP2_K5	89.484	MK(1)RPK(1)LK(1)K(1)ASK(1)R	3	-0.17894
sp|Q9BVP2|GNL3_HUMAN Guanine nucleotide-binding protein-like 3 OS=Homo sapiens OX=9606 GN=GNL3 PE=1 SV=2	Q9BVP2	7	Q9BVP2_K7	89.484	MK(1)RPK(1)LK(1)K(1)ASK(1)R	3	-0.17894
sp|Q9BVP2|GNL3_HUMAN Guanine nucleotide-binding protein-like 3 OS=Homo sapiens OX=9606 GN=GNL3 PE=1 SV=2	Q9BVP2	8	Q9BVP2_K8	89.484	MK(1)RPK(1)LK(1)K(1)ASK(1)R	3	-0.17894
sp|Q9BVP2|GNL3_HUMAN Guanine nucleotide-binding protein-like 3 OS=Homo sapiens OX=9606 GN=GNL3 PE=1 SV=2	Q9BVP2	11	Q9BVP2_K11	89.484	MK(1)RPK(1)LK(1)K(1)ASK(1)R	3	-0.17894
sp|Q9BW30|TPPP3_HUMAN Tubulin polymerization-promoting protein family member 3 OS=Homo sapiens OX=9606 GN=TPPP3 PE=1 SV=1	Q9BW30	63	Q9BW30_K63	53.869	VK(1)GK(1)SARVINYEEFK	3	-2.3686
sp|Q9BW30|TPPP3_HUMAN Tubulin polymerization-promoting protein family member 3 OS=Homo sapiens OX=9606 GN=TPPP3 PE=1 SV=1	Q9BW30	65	Q9BW30_K65	53.869	VK(1)GK(1)SARVINYEEFK	3	-2.3686
sp|Q9BXL6|CAR14_HUMAN Caspase recruitment domain-containing protein 14 OS=Homo sapiens OX=9606 GN=CARD14 PE=1 SV=2	Q9BXL6	769	Q9BXL6_K769	53.255	PSSGGPQK(1)LVRIVSMDK(1)AK	3	3.6355
sp|Q9BXL6|CAR14_HUMAN Caspase recruitment domain-containing protein 14 OS=Homo sapiens OX=9606 GN=CARD14 PE=1 SV=2	Q9BXL6	778	Q9BXL6_K778	53.255	PSSGGPQK(1)LVRIVSMDK(1)AK	3	3.6355
sp|Q9BY12|SCAPE_HUMAN S phase cyclin A-associated protein in the endoplasmic reticulum OS=Homo sapiens OX=9606 GN=SCAPER PE=1 SV=2	Q9BY12	537	Q9BY12_K537	41.422	K(0.999)RTIAESK(0.777)K(0.777)K(0.444)HEEK(0.004)QMK	2	-3.3803
sp|Q9BY12|SCAPE_HUMAN S phase cyclin A-associated protein in the endoplasmic reticulum OS=Homo sapiens OX=9606 GN=SCAPER PE=1 SV=2	Q9BY12	544	Q9BY12_K544	41.422	K(0.999)RTIAESK(0.777)K(0.777)K(0.444)HEEK(0.004)QMK	2	-3.3803
sp|Q9BY12|SCAPE_HUMAN S phase cyclin A-associated protein in the endoplasmic reticulum OS=Homo sapiens OX=9606 GN=SCAPER PE=1 SV=2	Q9BY12	545	Q9BY12_K545	41.422	K(0.999)RTIAESK(0.777)K(0.777)K(0.444)HEEK(0.004)QMK	2	-3.3803
sp|Q9BYG3|MK67I_HUMAN MKI67 FHA domain-interacting nucleolar phosphoprotein OS=Homo sapiens OX=9606 GN=NIFK PE=1 SV=1	Q9BYG3	139	Q9BYG3_K139	75.819	DWNIPFK(1)QPSYPSVK(1)R	2	1.9368
sp|Q9BYG3|MK67I_HUMAN MKI67 FHA domain-interacting nucleolar phosphoprotein OS=Homo sapiens OX=9606 GN=NIFK PE=1 SV=1	Q9BYG3	147	Q9BYG3_K147	75.819	DWNIPFK(1)QPSYPSVK(1)R	2	1.9368
sp|Q9BYX4|IFIH1_HUMAN Interferon-induced helicase C domain-containing protein 1 OS=Homo sapiens OX=9606 GN=IFIH1 PE=1 SV=3	Q9BYX4	591	Q9BYX4_K591	56.407	K(0.186)AAK(0.814)EGNRK(0.999)ERVCAEHLR	4	3.4188
sp|Q9BYX4|IFIH1_HUMAN Interferon-induced helicase C domain-containing protein 1 OS=Homo sapiens OX=9606 GN=IFIH1 PE=1 SV=3	Q9BYX4	596	Q9BYX4_K596	56.407	K(0.186)AAK(0.814)EGNRK(0.999)ERVCAEHLR	4	3.4188
sp|Q9BZB8|CPEB1_HUMAN Cytoplasmic polyadenylation element-binding protein 1 OS=Homo sapiens OX=9606 GN=CPEB1 PE=1 SV=1	Q9BZB8	499	Q9BZB8_K499	53.554	AVSAAFVEIK(0.012)TTK(0.99)FTK(0.998)K	3	2.006
sp|Q9BZB8|CPEB1_HUMAN Cytoplasmic polyadenylation element-binding protein 1 OS=Homo sapiens OX=9606 GN=CPEB1 PE=1 SV=1	Q9BZB8	502	Q9BZB8_K502	53.554	AVSAAFVEIK(0.012)TTK(0.99)FTK(0.998)K	3	2.006
sp|Q9BZZ5|API5_HUMAN Apoptosis inhibitor 5 OS=Homo sapiens OX=9606 GN=API5 PE=1 SV=3	Q9BZZ5	467	Q9BZZ5_K467	66.285	ASEDTTSGSPPK(1)K(1)SSAGPK(1)R	2	1.4182
sp|Q9BZZ5|API5_HUMAN Apoptosis inhibitor 5 OS=Homo sapiens OX=9606 GN=API5 PE=1 SV=3	Q9BZZ5	468	Q9BZZ5_K468	66.285	ASEDTTSGSPPK(1)K(1)SSAGPK(1)R	2	1.4182
sp|Q9BZZ5|API5_HUMAN Apoptosis inhibitor 5 OS=Homo sapiens OX=9606 GN=API5 PE=1 SV=3	Q9BZZ5	474	Q9BZZ5_K474	66.285	ASEDTTSGSPPK(1)K(1)SSAGPK(1)R	2	1.4182
sp|Q9C093|SPEF2_HUMAN Sperm flagellar protein 2 OS=Homo sapiens OX=9606 GN=SPEF2 PE=1 SV=2	Q9C093	1302	Q9C093_K1302	43.81	EK(0.001)SPQMGANK(0.094)K(0.27)VK(0.512)K(0.165)EPPK(0.958)K	4	2.0696
sp|Q9C093|SPEF2_HUMAN Sperm flagellar protein 2 OS=Homo sapiens OX=9606 GN=SPEF2 PE=1 SV=2	Q9C093	1307	Q9C093_K1307	43.81	EK(0.001)SPQMGANK(0.094)K(0.27)VK(0.512)K(0.165)EPPK(0.958)K	4	2.0696
sp|Q9C099|LRCC1_HUMAN Leucine-rich repeat and coiled-coil domain-containing protein 1 OS=Homo sapiens OX=9606 GN=LRRCC1 PE=1 SV=2	Q9C099	1017	Q9C099_K1017	66.351	NKKTMEAK(1)IK	2	3.8329
sp|Q9GZS3|SKI8_HUMAN Superkiller complex protein 8 OS=Homo sapiens OX=9606 GN=SKIC8 PE=1 SV=1	Q9GZS3	45	Q9GZS3_K45	102.33	KENSETVVTGSLDDLVK(0.996)VWK(0.004)WR	2	0.15139
sp|Q9H0S4|DDX47_HUMAN Probable ATP-dependent RNA helicase DDX47 OS=Homo sapiens OX=9606 GN=DDX47 PE=1 SV=1	Q9H0S4	443	Q9H0S4_K443	63.602	NK(1)VAGGK(1)MK(1)K(1)R	2	-0.18312
sp|Q9H0S4|DDX47_HUMAN Probable ATP-dependent RNA helicase DDX47 OS=Homo sapiens OX=9606 GN=DDX47 PE=1 SV=1	Q9H0S4	448	Q9H0S4_K448	63.602	NK(1)VAGGK(1)MK(1)K(1)R	2	-0.18312
sp|Q9H0S4|DDX47_HUMAN Probable ATP-dependent RNA helicase DDX47 OS=Homo sapiens OX=9606 GN=DDX47 PE=1 SV=1	Q9H0S4	450	Q9H0S4_K450	63.602	NK(1)VAGGK(1)MK(1)K(1)R	2	-0.18312
sp|Q9H0S4|DDX47_HUMAN Probable ATP-dependent RNA helicase DDX47 OS=Homo sapiens OX=9606 GN=DDX47 PE=1 SV=1	Q9H0S4	451	Q9H0S4_K451	63.602	NK(1)VAGGK(1)MK(1)K(1)R	2	-0.18312
sp|Q9H1E3|NUCKS_HUMAN Nuclear ubiquitous casein and cyclin-dependent kinase substrate 1 OS=Homo sapiens OX=9606 GN=NUCKS1 PE=1 SV=1	Q9H1E3	175	Q9H1E3_K175	107.39	LK(1)ATVTPSPVK	2	0.15103
sp|Q9H204|MED28_HUMAN Mediator of RNA polymerase II transcription subunit 28 OS=Homo sapiens OX=9606 GN=MED28 PE=1 SV=1	Q9H204	135	Q9H204_K135	57.802	KDALVQK(0.068)HLTK(0.932)LR	4	-1.1805
sp|Q9H2P9|DPH5_HUMAN Diphthine methyl ester synthase OS=Homo sapiens OX=9606 GN=DPH5 PE=1 SV=2	Q9H2P9	177	Q9H2P9_K177	95.483	EQSLENLIK(1)GR	3	-0.67806
sp|Q9H307|PININ_HUMAN Pinin OS=Homo sapiens OX=9606 GN=PNN PE=1 SV=5	Q9H307	553	Q9H307_K553	47.752	LTEVPVEPVLTVHPESK(1)SK	3	0.32555
sp|Q9H6F5|CCD86_HUMAN Coiled-coil domain-containing protein 86 OS=Homo sapiens OX=9606 GN=CCDC86 PE=1 SV=1	Q9H6F5	332	Q9H6F5_K332	64.42	AK(1)K(1)K(1)QLR	2	0.62
sp|Q9H6F5|CCD86_HUMAN Coiled-coil domain-containing protein 86 OS=Homo sapiens OX=9606 GN=CCDC86 PE=1 SV=1	Q9H6F5	333	Q9H6F5_K333	64.42	AK(1)K(1)K(1)QLR	2	0.62
sp|Q9H6F5|CCD86_HUMAN Coiled-coil domain-containing protein 86 OS=Homo sapiens OX=9606 GN=CCDC86 PE=1 SV=1	Q9H6F5	334	Q9H6F5_K334	64.42	AK(1)K(1)K(1)QLR	2	0.62
sp|Q9H6F5|CCD86_HUMAN Coiled-coil domain-containing protein 86 OS=Homo sapiens OX=9606 GN=CCDC86 PE=1 SV=1	Q9H6F5	237	Q9H6F5_K237	76.176	EELPVIPK(0.979)GK(0.036)PK(0.985)SGR	3	0.57733
sp|Q9H6F5|CCD86_HUMAN Coiled-coil domain-containing protein 86 OS=Homo sapiens OX=9606 GN=CCDC86 PE=1 SV=1	Q9H6F5	241	Q9H6F5_K241	76.176	EELPVIPK(0.979)GK(0.036)PK(0.985)SGR	3	0.57733
sp|Q9H6F5|CCD86_HUMAN Coiled-coil domain-containing protein 86 OS=Homo sapiens OX=9606 GN=CCDC86 PE=1 SV=1	Q9H6F5	212	Q9H6F5_K212	70.15	GQHEPSKPPPAGETVTGGFGAK(1)K	3	2.1566
sp|Q9H7N4|SFR19_HUMAN Splicing factor, arginine/serine-rich 19 OS=Homo sapiens OX=9606 GN=SCAF1 PE=1 SV=3	Q9H7N4	865	Q9H7N4_K865	90.926	DAASAGLGSIGVK(1)FSR	2	1.633
sp|Q9H7N4|SFR19_HUMAN Splicing factor, arginine/serine-rich 19 OS=Homo sapiens OX=9606 GN=SCAF1 PE=1 SV=3	Q9H7N4	899	Q9H7N4_K899	55.011	K(1)TK(1)VK(1)AK(1)AGAK(1)K	2	3.6291
sp|Q9H7N4|SFR19_HUMAN Splicing factor, arginine/serine-rich 19 OS=Homo sapiens OX=9606 GN=SCAF1 PE=1 SV=3	Q9H7N4	901	Q9H7N4_K901	55.011	K(1)TK(1)VK(1)AK(1)AGAK(1)K	2	3.6291
sp|Q9H7N4|SFR19_HUMAN Splicing factor, arginine/serine-rich 19 OS=Homo sapiens OX=9606 GN=SCAF1 PE=1 SV=3	Q9H7N4	903	Q9H7N4_K903	55.011	K(1)TK(1)VK(1)AK(1)AGAK(1)K	2	3.6291
sp|Q9H7N4|SFR19_HUMAN Splicing factor, arginine/serine-rich 19 OS=Homo sapiens OX=9606 GN=SCAF1 PE=1 SV=3	Q9H7N4	905	Q9H7N4_K905	55.011	K(1)TK(1)VK(1)AK(1)AGAK(1)K	2	3.6291
sp|Q9H7N4|SFR19_HUMAN Splicing factor, arginine/serine-rich 19 OS=Homo sapiens OX=9606 GN=SCAF1 PE=1 SV=3	Q9H7N4	909	Q9H7N4_K909	55.011	K(1)TK(1)VK(1)AK(1)AGAK(1)K	2	3.6291
sp|Q9H875|PKRI1_HUMAN PRKR-interacting protein 1 OS=Homo sapiens OX=9606 GN=PRKRIP1 PE=1 SV=1	Q9H875	126	Q9H875_K126	108.31	IAAEEQTAK(1)R	2	0.13991
sp|Q9HAF1|EAF6_HUMAN Chromatin modification-related protein MEAF6 OS=Homo sapiens OX=9606 GN=MEAF6 PE=1 SV=1	Q9HAF1	169	Q9HAF1_K169	174.72	AASSTSSGSHHSSHK(1)K(1)R	2	-0.3859
sp|Q9HAF1|EAF6_HUMAN Chromatin modification-related protein MEAF6 OS=Homo sapiens OX=9606 GN=MEAF6 PE=1 SV=1	Q9HAF1	170	Q9HAF1_K170	174.72	AASSTSSGSHHSSHK(1)K(1)R	2	-0.3859
sp|Q9HAF1|EAF6_HUMAN Chromatin modification-related protein MEAF6 OS=Homo sapiens OX=9606 GN=MEAF6 PE=1 SV=1	Q9HAF1	182	Q9HAF1_K182	101.95	IDLK(1)LNK(0.882)K(0.118)PR	3	0.1895
sp|Q9HAF1|EAF6_HUMAN Chromatin modification-related protein MEAF6 OS=Homo sapiens OX=9606 GN=MEAF6 PE=1 SV=1	Q9HAF1	185	Q9HAF1_K185	101.95	IDLK(1)LNK(0.943)K(0.057)PR	2	-0.016826
sp|Q9HAU0|PKHA5_HUMAN Pleckstrin homology domain-containing family A member 5 OS=Homo sapiens OX=9606 GN=PLEKHA5 PE=1 SV=1	Q9HAU0	319	Q9HAU0_K319	62.732	NKEMSK(0.007)IEEK(0.993)K	2	-2.5763
sp|Q9NPC4|A4GAT_HUMAN Lactosylceramide 4-alpha-galactosyltransferase OS=Homo sapiens OX=9606 GN=A4GALT PE=1 SV=1	Q9NPC4	293	Q9NPC4_K293	40.085	GVTTLPPEAFYPIPWQDWK(1)K	3	-0.68373
sp|Q9NR09|BIRC6_HUMAN Baculoviral IAP repeat-containing protein 6 OS=Homo sapiens OX=9606 GN=BIRC6 PE=1 SV=3	Q9NR09	2248	Q9NR09_K2248	59.418	AK(0.978)QK(0.022)ALVEQMEK	3	-3.7257
sp|Q9NR30|DDX21_HUMAN Nucleolar RNA helicase 2 OS=Homo sapiens OX=9606 GN=DDX21 PE=1 SV=5	Q9NR30	25	Q9NR30_K25	47.532	K(1)QTEEK(0.917)EK(0.334)K(0.917)EK(0.917)PK(0.917)SDK	3	-3.3115
sp|Q9NR30|DDX21_HUMAN Nucleolar RNA helicase 2 OS=Homo sapiens OX=9606 GN=DDX21 PE=1 SV=5	Q9NR30	30	Q9NR30_K30	47.532	K(1)QTEEK(0.917)EK(0.334)K(0.917)EK(0.917)PK(0.917)SDK	3	-3.3115
sp|Q9NR30|DDX21_HUMAN Nucleolar RNA helicase 2 OS=Homo sapiens OX=9606 GN=DDX21 PE=1 SV=5	Q9NR30	33	Q9NR30_K33	47.532	K(1)QTEEK(0.917)EK(0.334)K(0.917)EK(0.917)PK(0.917)SDK	3	-3.3115
sp|Q9NR30|DDX21_HUMAN Nucleolar RNA helicase 2 OS=Homo sapiens OX=9606 GN=DDX21 PE=1 SV=5	Q9NR30	35	Q9NR30_K35	47.532	K(1)QTEEK(0.917)EK(0.334)K(0.917)EK(0.917)PK(0.917)SDK	3	-3.3115
sp|Q9NR30|DDX21_HUMAN Nucleolar RNA helicase 2 OS=Homo sapiens OX=9606 GN=DDX21 PE=1 SV=5	Q9NR30	37	Q9NR30_K37	47.532	K(1)QTEEK(0.917)EK(0.334)K(0.917)EK(0.917)PK(0.917)SDK	3	-3.3115
sp|Q9NR30|DDX21_HUMAN Nucleolar RNA helicase 2 OS=Homo sapiens OX=9606 GN=DDX21 PE=1 SV=5	Q9NR30	131	Q9NR30_K131	89.301	NEEPSEEEIDAPK(0.311)PK(0.689)K	2	-0.38689
sp|Q9NTJ3|SMC4_HUMAN Structural maintenance of chromosomes protein 4 OS=Homo sapiens OX=9606 GN=SMC4 PE=1 SV=2	Q9NTJ3	1273	Q9NTJ3_K1273	43.598	TYNITK(1)SVAVNPK(1)EIASK(1)GLC	3	0.9113
sp|Q9NTJ3|SMC4_HUMAN Structural maintenance of chromosomes protein 4 OS=Homo sapiens OX=9606 GN=SMC4 PE=1 SV=2	Q9NTJ3	1280	Q9NTJ3_K1280	43.598	TYNITK(1)SVAVNPK(1)EIASK(1)GLC	3	0.9113
sp|Q9NTJ3|SMC4_HUMAN Structural maintenance of chromosomes protein 4 OS=Homo sapiens OX=9606 GN=SMC4 PE=1 SV=2	Q9NTJ3	1285	Q9NTJ3_K1285	43.598	TYNITK(1)SVAVNPK(1)EIASK(1)GLC	3	0.9113
sp|Q9NUQ6|SPS2L_HUMAN SPATS2-like protein OS=Homo sapiens OX=9606 GN=SPATS2L PE=1 SV=2	Q9NUQ6	484	Q9NUQ6_K484	44.441	QPHNGFRPK(0.252)NK(0.759)GGAK(0.988)NQEASLGMK	3	-4.2648
sp|Q9NUQ6|SPS2L_HUMAN SPATS2-like protein OS=Homo sapiens OX=9606 GN=SPATS2L PE=1 SV=2	Q9NUQ6	488	Q9NUQ6_K488	44.441	QPHNGFRPK(0.252)NK(0.759)GGAK(0.988)NQEASLGMK	3	-4.2648
sp|Q9NV06|DCA13_HUMAN DDB1- and CUL4-associated factor 13 OS=Homo sapiens OX=9606 GN=DCAF13 PE=1 SV=2	Q9NV06	398	Q9NV06_K398	73.841	HLPK(1)SIYSQIQEQR	2	-0.84231
sp|Q9NVI1|FANCI_HUMAN Fanconi anemia group I protein OS=Homo sapiens OX=9606 GN=FANCI PE=1 SV=4	Q9NVI1	1270	Q9NVI1_K1270	58.132	K(0.998)SK(0.002)VNLMQHMKLSTSR	2	-2.0053
sp|Q9NW13|RBM28_HUMAN RNA-binding protein 28 OS=Homo sapiens OX=9606 GN=RBM28 PE=1 SV=3	Q9NW13	695	Q9NW13_K695	71.153	VKPVHPK(0.84)K(0.16)PK	3	-1.0119
sp|Q9NWT1|PK1IP_HUMAN p21-activated protein kinase-interacting protein 1 OS=Homo sapiens OX=9606 GN=PAK1IP1 PE=1 SV=2	Q9NWT1	359	Q9NWT1_K359	44.367	GLTGDSK(1)K(1)ATK(1)ESGLISTK(1)K(1)R	2	-1.0015
sp|Q9NWT1|PK1IP_HUMAN p21-activated protein kinase-interacting protein 1 OS=Homo sapiens OX=9606 GN=PAK1IP1 PE=1 SV=2	Q9NWT1	360	Q9NWT1_K360	44.367	GLTGDSK(1)K(1)ATK(1)ESGLISTK(1)K(1)R	2	-1.0015
sp|Q9NWT1|PK1IP_HUMAN p21-activated protein kinase-interacting protein 1 OS=Homo sapiens OX=9606 GN=PAK1IP1 PE=1 SV=2	Q9NWT1	363	Q9NWT1_K363	44.367	GLTGDSK(1)K(1)ATK(1)ESGLISTK(1)K(1)R	2	-1.0015
sp|Q9NWT1|PK1IP_HUMAN p21-activated protein kinase-interacting protein 1 OS=Homo sapiens OX=9606 GN=PAK1IP1 PE=1 SV=2	Q9NWT1	371	Q9NWT1_K371	42.44	GLTGDSK(1)K(1)ATK(1)ESGLISTK(1)K(1)R	2	-1.0015
sp|Q9NWT1|PK1IP_HUMAN p21-activated protein kinase-interacting protein 1 OS=Homo sapiens OX=9606 GN=PAK1IP1 PE=1 SV=2	Q9NWT1	372	Q9NWT1_K372	42.44	GLTGDSK(1)K(1)ATK(1)ESGLISTK(1)K(1)R	2	-1.0015
sp|Q9NX58|LYAR_HUMAN Cell growth-regulating nucleolar protein OS=Homo sapiens OX=9606 GN=LYAR PE=1 SV=3	Q9NX58	185	Q9NX58_K185	108.63	DAVEQQGEVK(1)K(1)NK(1)R	2	0.70805
sp|Q9NX58|LYAR_HUMAN Cell growth-regulating nucleolar protein OS=Homo sapiens OX=9606 GN=LYAR PE=1 SV=3	Q9NX58	186	Q9NX58_K186	108.63	DAVEQQGEVK(1)K(1)NK(1)R	2	0.70805
sp|Q9NX58|LYAR_HUMAN Cell growth-regulating nucleolar protein OS=Homo sapiens OX=9606 GN=LYAR PE=1 SV=3	Q9NX58	188	Q9NX58_K188	108.63	DAVEQQGEVK(1)K(1)NK(1)R	2	0.70805
sp|Q9NX58|LYAR_HUMAN Cell growth-regulating nucleolar protein OS=Homo sapiens OX=9606 GN=LYAR PE=1 SV=3	Q9NX58	203	Q9NX58_K203	58.848	EK(1)K(1)ELK(1)LENHQENSR	3	-0.21871
sp|Q9NX58|LYAR_HUMAN Cell growth-regulating nucleolar protein OS=Homo sapiens OX=9606 GN=LYAR PE=1 SV=3	Q9NX58	204	Q9NX58_K204	125.67	EK(1)K(1)ELK(1)LENHQENSR	3	-0.21871
sp|Q9NX58|LYAR_HUMAN Cell growth-regulating nucleolar protein OS=Homo sapiens OX=9606 GN=LYAR PE=1 SV=3	Q9NX58	207	Q9NX58_K207	125.67	EK(1)K(1)ELK(1)LENHQENSR	3	-0.21871
sp|Q9NX58|LYAR_HUMAN Cell growth-regulating nucleolar protein OS=Homo sapiens OX=9606 GN=LYAR PE=1 SV=3	Q9NX58	283	Q9NX58_K283	125.16	RHSEVETDSK(1)K(1)K(1)K	2	0.31309
sp|Q9NX58|LYAR_HUMAN Cell growth-regulating nucleolar protein OS=Homo sapiens OX=9606 GN=LYAR PE=1 SV=3	Q9NX58	284	Q9NX58_K284	125.16	RHSEVETDSK(1)K(1)K(1)K	2	0.31309
sp|Q9NX58|LYAR_HUMAN Cell growth-regulating nucleolar protein OS=Homo sapiens OX=9606 GN=LYAR PE=1 SV=3	Q9NX58	285	Q9NX58_K285	125.16	RHSEVETDSK(1)K(1)K(1)K	2	0.31309
sp|Q9NX58|LYAR_HUMAN Cell growth-regulating nucleolar protein OS=Homo sapiens OX=9606 GN=LYAR PE=1 SV=3	Q9NX58	224	Q9NX58_K224	126.91	K(0.5)K(0.5)GQEADLEAGGEEVPEANGSAGK(1)R	2	-0.3646
sp|Q9NX58|LYAR_HUMAN Cell growth-regulating nucleolar protein OS=Homo sapiens OX=9606 GN=LYAR PE=1 SV=3	Q9NX58	225	Q9NX58_K225	126.91	K(0.5)K(0.5)GQEADLEAGGEEVPEANGSAGK(1)R	2	-0.3646
sp|Q9NX58|LYAR_HUMAN Cell growth-regulating nucleolar protein OS=Homo sapiens OX=9606 GN=LYAR PE=1 SV=3	Q9NX58	247	Q9NX58_K247	126.91	K(0.5)K(0.5)GQEADLEAGGEEVPEANGSAGK(1)R	2	-0.3646
sp|Q9NX58|LYAR_HUMAN Cell growth-regulating nucleolar protein OS=Homo sapiens OX=9606 GN=LYAR PE=1 SV=3	Q9NX58	288	Q9NX58_K288	71.98	MK(1)LPEHPEGGEPEDDEAPAK	2	0.1235
sp|Q9NX58|LYAR_HUMAN Cell growth-regulating nucleolar protein OS=Homo sapiens OX=9606 GN=LYAR PE=1 SV=3	Q9NX58	250	Q9NX58_K250	55.007	SK(1)K(1)K(1)K(1)QRK(1)DSASEEEAR	2	-0.14684
sp|Q9NX58|LYAR_HUMAN Cell growth-regulating nucleolar protein OS=Homo sapiens OX=9606 GN=LYAR PE=1 SV=3	Q9NX58	251	Q9NX58_K251	55.007	SK(1)K(1)K(1)K(1)QRK(1)DSASEEEAR	2	-0.14684
sp|Q9NX58|LYAR_HUMAN Cell growth-regulating nucleolar protein OS=Homo sapiens OX=9606 GN=LYAR PE=1 SV=3	Q9NX58	252	Q9NX58_K252	55.007	SK(1)K(1)K(1)K(1)QRK(1)DSASEEEAR	2	-0.14684
sp|Q9NX58|LYAR_HUMAN Cell growth-regulating nucleolar protein OS=Homo sapiens OX=9606 GN=LYAR PE=1 SV=3	Q9NX58	253	Q9NX58_K253	55.007	SK(1)K(1)K(1)K(1)QRK(1)DSASEEEAR	2	-0.14684
sp|Q9NX58|LYAR_HUMAN Cell growth-regulating nucleolar protein OS=Homo sapiens OX=9606 GN=LYAR PE=1 SV=3	Q9NX58	256	Q9NX58_K256	55.007	SK(1)K(1)K(1)K(1)QRK(1)DSASEEEAR	2	-0.14684
sp|Q9NY28|GALT8_HUMAN Probable polypeptide N-acetylgalactosaminyltransferase 8 OS=Homo sapiens OX=9606 GN=GALNT8 PE=2 SV=1	Q9NY28	6	Q9NY28_K6	44.721	MMFWRK(1)LPK	2	-1.5247
sp|Q9NYV4|CDK12_HUMAN Cyclin-dependent kinase 12 OS=Homo sapiens OX=9606 GN=CDK12 PE=1 SV=2	Q9NYV4	126	Q9NYV4_K126	40.81	AK(0.982)QTEK(0.928)EK(0.09)SQEVSSK(0.298)SGSMK(0.701)DR	3	-1.7252
sp|Q9NYV4|CDK12_HUMAN Cyclin-dependent kinase 12 OS=Homo sapiens OX=9606 GN=CDK12 PE=1 SV=2	Q9NYV4	130	Q9NYV4_K130	40.81	AK(0.982)QTEK(0.928)EK(0.09)SQEVSSK(0.298)SGSMK(0.701)DR	3	-1.7252
sp|Q9NYV4|CDK12_HUMAN Cyclin-dependent kinase 12 OS=Homo sapiens OX=9606 GN=CDK12 PE=1 SV=2	Q9NYV4	144	Q9NYV4_K144	40.81	AK(0.982)QTEK(0.928)EK(0.09)SQEVSSK(0.298)SGSMK(0.701)DR	3	-1.7252
sp|Q9NYV4|CDK12_HUMAN Cyclin-dependent kinase 12 OS=Homo sapiens OX=9606 GN=CDK12 PE=1 SV=2	Q9NYV4	371	Q9NYV4_K371	43.208	SPAYSRHSSSHSK(0.968)K(0.516)K(0.516)RSSSR	3	3.7614
sp|Q9NYV4|CDK12_HUMAN Cyclin-dependent kinase 12 OS=Homo sapiens OX=9606 GN=CDK12 PE=1 SV=2	Q9NYV4	372	Q9NYV4_K372	43.208	SPAYSRHSSSHSK(0.968)K(0.516)K(0.516)RSSSR	3	3.7614
sp|Q9NYV4|CDK12_HUMAN Cyclin-dependent kinase 12 OS=Homo sapiens OX=9606 GN=CDK12 PE=1 SV=2	Q9NYV4	373	Q9NYV4_K373	43.208	SPAYSRHSSSHSK(0.968)K(0.516)K(0.516)RSSSR	3	3.7614
sp|Q9NZ56|FMN2_HUMAN Formin-2 OS=Homo sapiens OX=9606 GN=FMN2 PE=1 SV=4	Q9NZ56	1294	Q9NZ56_K1294	77.058	PMK(1)PLYWTR	2	0.9913
sp|Q9NZ81|PRR13_HUMAN Proline-rich protein 13 OS=Homo sapiens OX=9606 GN=PRR13 PE=1 SV=1	Q9NZ81	122	Q9NZ81_K122	74.649	MHK(1)HQK(1)HHK(1)YHK	2	-0.88012
sp|Q9NZ81|PRR13_HUMAN Proline-rich protein 13 OS=Homo sapiens OX=9606 GN=PRR13 PE=1 SV=1	Q9NZ81	125	Q9NZ81_K125	74.649	MHK(1)HQK(1)HHK(1)YHK	2	-0.88012
sp|Q9NZ81|PRR13_HUMAN Proline-rich protein 13 OS=Homo sapiens OX=9606 GN=PRR13 PE=1 SV=1	Q9NZ81	128	Q9NZ81_K128	74.649	MHK(1)HQK(1)HHK(1)YHK	2	-0.88012
sp|Q9NZK5|ADA2_HUMAN Adenosine deaminase 2 OS=Homo sapiens OX=9606 GN=ADA2 PE=1 SV=2	Q9NZK5	498	Q9NZK5_K498	59.8	NTFMEIWK(1)K	2	-1.2661
sp|Q9NZM3|ITSN2_HUMAN Intersectin-2 OS=Homo sapiens OX=9606 GN=ITSN2 PE=1 SV=3	Q9NZM3	723	Q9NZM3_K723	58.107	QK(0.253)RLQEEK(0.813)TQEK(0.933)IQEEERKAEEK	3	1.3475
sp|Q9NZM3|ITSN2_HUMAN Intersectin-2 OS=Homo sapiens OX=9606 GN=ITSN2 PE=1 SV=3	Q9NZM3	727	Q9NZM3_K727	58.107	QK(0.253)RLQEEK(0.813)TQEK(0.933)IQEEERKAEEK	3	1.3475
sp|Q9P0L0|VAPA_HUMAN Vesicle-associated membrane protein-associated protein A OS=Homo sapiens OX=9606 GN=VAPA PE=1 SV=3	Q9P0L0	52	Q9P0L0_K52	50.108	NPSDRK(0.029)VCFK(0.243)VK(0.728)TTAPRRYCVR	2	-2.2725
sp|Q9P2D1|CHD7_HUMAN Chromodomain-helicase-DNA-binding protein 7 OS=Homo sapiens OX=9606 GN=CHD7 PE=1 SV=3	Q9P2D1	697	Q9P2D1_K697	51.135	SSK(0.173)K(0.665)SSNK(0.081)K(0.081)PDSEASALK	2	-3.6708
sp|Q9UGI8|TES_HUMAN Testin OS=Homo sapiens OX=9606 GN=TES PE=1 SV=1	Q9UGI8	180	Q9UGI8_K180	43.442	EMEQFVK(1)K	2	3.7904
sp|Q9UHR5|S30BP_HUMAN SAP30-binding protein OS=Homo sapiens OX=9606 GN=SAP30BP PE=1 SV=1	Q9UHR5	304	Q9UHR5_K304	88.134	TTVISAVGTIVK(1)K	2	0.067298
sp|Q9UIS9|MBD1_HUMAN Methyl-CpG-binding domain protein 1 OS=Homo sapiens OX=9606 GN=MBD1 PE=1 SV=2	Q9UIS9	271	Q9UIS9_K271	53.6	GK(0.146)HARRK(0.854)GGCDSKMAARR	2	-2.8088
sp|Q9UKX7|NUP50_HUMAN Nuclear pore complex protein Nup50 OS=Homo sapiens OX=9606 GN=NUP50 PE=1 SV=2	Q9UKX7	59	Q9UKX7_K59	96.247	NVGFESDTGGAFK(1)GFK	2	-0.78373
sp|Q9UKY7|CDV3_HUMAN Protein CDV3 homolog OS=Homo sapiens OX=9606 GN=CDV3 PE=1 SV=1	Q9UKY7	15	Q9UKY7_K15	91.867	SLDNFFAK(1)R	2	-0.49188
sp|Q9ULW0|TPX2_HUMAN Targeting protein for Xklp2 OS=Homo sapiens OX=9606 GN=TPX2 PE=1 SV=2	Q9ULW0	740	Q9ULW0_K740	104.94	SSDQPLTVPVSPK(1)FSTR	2	-1.0784
sp|Q9UNF1|MAGD2_HUMAN Melanoma-associated antigen D2 OS=Homo sapiens OX=9606 GN=MAGED2 PE=1 SV=2	Q9UNF1	261	Q9UNF1_K261	77.124	AAK(1)LQSSQEPEAPPPR	2	1.1223
sp|Q9UNZ5|L10K_HUMAN Leydig cell tumor 10 kDa protein homolog OS=Homo sapiens OX=9606 GN=C19orf53 PE=1 SV=1	Q9UNZ5	12	Q9UNZ5_K12	94.547	KFQAHK(1)PAK(1)SK	2	-1.0746
sp|Q9UNZ5|L10K_HUMAN Leydig cell tumor 10 kDa protein homolog OS=Homo sapiens OX=9606 GN=C19orf53 PE=1 SV=1	Q9UNZ5	15	Q9UNZ5_K15	94.547	KFQAHK(1)PAK(1)SK	2	-1.0746
sp|Q9UNZ5|L10K_HUMAN Leydig cell tumor 10 kDa protein homolog OS=Homo sapiens OX=9606 GN=C19orf53 PE=1 SV=1	Q9UNZ5	81	Q9UNZ5_K81	74.165	LALLK(1)APAK	2	-0.37514
sp|Q9Y2S6|TMA7_HUMAN Translation machinery-associated protein 7 OS=Homo sapiens OX=9606 GN=TMA7 PE=1 SV=1;sp|A0A024R1R8|TMA7B_HUMAN Translation machinery-associated protein 7B OS=Homo sapiens OX=9606 GN=TMA7B PE=3 SV=1	Q9Y2S6	59	Q9Y2S6_K59	92.151	GPLATGGIK(1)K(1)SGK(1)K	2	0.50185
sp|Q9Y2S6|TMA7_HUMAN Translation machinery-associated protein 7 OS=Homo sapiens OX=9606 GN=TMA7 PE=1 SV=1;sp|A0A024R1R8|TMA7B_HUMAN Translation machinery-associated protein 7B OS=Homo sapiens OX=9606 GN=TMA7B PE=3 SV=1	Q9Y2S6	60	Q9Y2S6_K60	92.151	GPLATGGIK(1)K(1)SGK(1)K	2	0.50185
sp|Q9Y2S6|TMA7_HUMAN Translation machinery-associated protein 7 OS=Homo sapiens OX=9606 GN=TMA7 PE=1 SV=1;sp|A0A024R1R8|TMA7B_HUMAN Translation machinery-associated protein 7B OS=Homo sapiens OX=9606 GN=TMA7B PE=3 SV=1	Q9Y2S6	63	Q9Y2S6_K63	72.898	GPLATGGIK(1)K(1)SGK(1)K	2	0.50185
sp|Q9Y2S6|TMA7_HUMAN Translation machinery-associated protein 7 OS=Homo sapiens OX=9606 GN=TMA7 PE=1 SV=1	Q9Y2S6	13	Q9Y2S6_K13	96.113	KK(0.001)PLK(0.999)QPK(1)K	2	0.43319
sp|Q9Y2S6|TMA7_HUMAN Translation machinery-associated protein 7 OS=Homo sapiens OX=9606 GN=TMA7 PE=1 SV=1	Q9Y2S6	16	Q9Y2S6_K16	96.113	KK(0.001)PLK(0.999)QPK(1)K	2	0.43319
sp|Q9Y2W2|WBP11_HUMAN WW domain-binding protein 11 OS=Homo sapiens OX=9606 GN=WBP11 PE=1 SV=1	Q9Y2W2	13	Q9Y2W2_K13	92.236	STSSTK(1)SGK(1)FMNPTDQAR	2	-0.68593
sp|Q9Y2W2|WBP11_HUMAN WW domain-binding protein 11 OS=Homo sapiens OX=9606 GN=WBP11 PE=1 SV=1	Q9Y2W2	10	Q9Y2W2_K10	92.236	STSSTK(1)SGK(1)FMNPTDQAR	2	-0.68593
sp|Q9Y2X3|NOP58_HUMAN Nucleolar protein 58 OS=Homo sapiens OX=9606 GN=NOP58 PE=1 SV=1	Q9Y2X3	457	Q9Y2X3_K457	92.247	IEQVDKEDEITEK(1)K	2	-0.75928
sp|Q9Y2X3|NOP58_HUMAN Nucleolar protein 58 OS=Homo sapiens OX=9606 GN=NOP58 PE=1 SV=1	Q9Y2X3	458	Q9Y2X3_K458	54.605	IEQVDK(0.033)EDEITEK(0.977)K(0.992)AK(0.999)K(0.999)AK(0.999)IK	3	-0.40608
sp|Q9Y2X3|NOP58_HUMAN Nucleolar protein 58 OS=Homo sapiens OX=9606 GN=NOP58 PE=1 SV=1	Q9Y2X3	460	Q9Y2X3_K460	54.605	IEQVDK(0.033)EDEITEK(0.977)K(0.992)AK(0.999)K(0.999)AK(0.999)IK	3	-0.40608
sp|Q9Y2X3|NOP58_HUMAN Nucleolar protein 58 OS=Homo sapiens OX=9606 GN=NOP58 PE=1 SV=1	Q9Y2X3	461	Q9Y2X3_K461	54.605	IEQVDK(0.033)EDEITEK(0.977)K(0.992)AK(0.999)K(0.999)AK(0.999)IK	3	-0.40608
sp|Q9Y2X3|NOP58_HUMAN Nucleolar protein 58 OS=Homo sapiens OX=9606 GN=NOP58 PE=1 SV=1	Q9Y2X3	463	Q9Y2X3_K463	54.605	IEQVDK(0.033)EDEITEK(0.977)K(0.992)AK(0.999)K(0.999)AK(0.999)IK	3	-0.40608
sp|Q9Y2X3|NOP58_HUMAN Nucleolar protein 58 OS=Homo sapiens OX=9606 GN=NOP58 PE=1 SV=1	Q9Y2X3	485	Q9Y2X3_K485	59.819	VEEEEEEKVAEEEETSVK(0.993)K(0.81)K(0.289)K(0.933)K(0.975)R	4	-0.66162
sp|Q9Y2X3|NOP58_HUMAN Nucleolar protein 58 OS=Homo sapiens OX=9606 GN=NOP58 PE=1 SV=1	Q9Y2X3	486	Q9Y2X3_K486	59.819	VEEEEEEKVAEEEETSVK(0.993)K(0.81)K(0.289)K(0.933)K(0.975)R	4	-0.66162
sp|Q9Y2X3|NOP58_HUMAN Nucleolar protein 58 OS=Homo sapiens OX=9606 GN=NOP58 PE=1 SV=1	Q9Y2X3	488	Q9Y2X3_K488	59.819	VEEEEEEKVAEEEETSVK(0.993)K(0.81)K(0.289)K(0.933)K(0.975)R	4	-0.66162
sp|Q9Y2X3|NOP58_HUMAN Nucleolar protein 58 OS=Homo sapiens OX=9606 GN=NOP58 PE=1 SV=1	Q9Y2X3	489	Q9Y2X3_K489	59.819	VEEEEEEKVAEEEETSVK(0.993)K(0.81)K(0.289)K(0.933)K(0.975)R	4	-0.66162
sp|Q9Y388|RBMX2_HUMAN RNA-binding motif protein, X-linked 2 OS=Homo sapiens OX=9606 GN=RBMX2 PE=1 SV=2	Q9Y388	223	Q9Y388_K223	73.435	EGQK(1)LPK(1)SR	2	1.0698
sp|Q9Y388|RBMX2_HUMAN RNA-binding motif protein, X-linked 2 OS=Homo sapiens OX=9606 GN=RBMX2 PE=1 SV=2	Q9Y388	226	Q9Y388_K226	73.435	EGQK(1)LPK(1)SR	2	1.0698
sp|Q9Y3B9|RRP15_HUMAN RRP15-like protein OS=Homo sapiens OX=9606 GN=RRP15 PE=1 SV=2	Q9Y3B9	179	Q9Y3B9_K179	81.632	GVVQLFNAVQK(1)HQK(1)NVDEK	3	1.5327
sp|Q9Y3B9|RRP15_HUMAN RRP15-like protein OS=Homo sapiens OX=9606 GN=RRP15 PE=1 SV=2	Q9Y3B9	182	Q9Y3B9_K182	65.677	GVVQLFNAVQK(1)HQK(1)NVDEK	3	1.5327
sp|Q9Y3C1|NOP16_HUMAN Nucleolar protein 16 OS=Homo sapiens OX=9606 GN=NOP16 PE=1 SV=2	Q9Y3C1	74	Q9Y3C1_K74	77.644	VK(1)AMEVDIEERPK(1)ELVR	3	0.65755
sp|Q9Y3C1|NOP16_HUMAN Nucleolar protein 16 OS=Homo sapiens OX=9606 GN=NOP16 PE=1 SV=2	Q9Y3C1	85	Q9Y3C1_K85	50.873	VK(1)AMEVDIEERPK(1)ELVR	3	0.65755
sp|Q9Y3U8|RL36_HUMAN Large ribosomal subunit protein eL36 OS=Homo sapiens OX=9606 GN=RPL36 PE=1 SV=3	Q9Y3U8	16	Q9Y3U8_K16	95.067	GHK(1)VTK(0.999)NVSK(0.001)PR	3	-0.27642
sp|Q9Y3U8|RL36_HUMAN Large ribosomal subunit protein eL36 OS=Homo sapiens OX=9606 GN=RPL36 PE=1 SV=3	Q9Y3U8	19	Q9Y3U8_K19	95.067	GHK(1)VTK(0.999)NVSK(0.001)PR	3	-0.27642
sp|Q9Y421|FA32A_HUMAN Protein FAM32A OS=Homo sapiens OX=9606 GN=FAM32A PE=1 SV=2	Q9Y421	79	Q9Y421_K79	69.716	ILK(1)K(1)ASK(1)THK	3	0.22024
sp|Q9Y421|FA32A_HUMAN Protein FAM32A OS=Homo sapiens OX=9606 GN=FAM32A PE=1 SV=2	Q9Y421	80	Q9Y421_K80	69.716	ILK(1)K(1)ASK(1)THK	3	0.22024
sp|Q9Y421|FA32A_HUMAN Protein FAM32A OS=Homo sapiens OX=9606 GN=FAM32A PE=1 SV=2	Q9Y421	83	Q9Y421_K83	69.716	ILK(1)K(1)ASK(1)THK	3	0.22024
sp|Q9Y421|FA32A_HUMAN Protein FAM32A OS=Homo sapiens OX=9606 GN=FAM32A PE=1 SV=2	Q9Y421	45	Q9Y421_K45	61.344	LLEAMGTSK(1)K(1)NEEEK	2	-1.2135
sp|Q9Y421|FA32A_HUMAN Protein FAM32A OS=Homo sapiens OX=9606 GN=FAM32A PE=1 SV=2	Q9Y421	46	Q9Y421_K46	61.344	LLEAMGTSK(1)K(1)NEEEK	2	-1.2135
sp|Q9Y4A0|JERKL_HUMAN Jerky protein homolog-like OS=Homo sapiens OX=9606 GN=JRKL PE=2 SV=2	Q9Y4A0	518	Q9Y4A0_K518	58.782	QK(0.999)MTK(0.001)SSQ	1	-4.146
sp|Q9Y4D8|HECD4_HUMAN Probable E3 ubiquitin-protein ligase HECTD4 OS=Homo sapiens OX=9606 GN=HECTD4 PE=1 SV=5	Q9Y4D8	1629	Q9Y4D8_K1629	70.552	K(1)TAQTSICRER	2	1.6807
sp|Q9Y4I1|MYO5A_HUMAN Unconventional myosin-Va OS=Homo sapiens OX=9606 GN=MYO5A PE=1 SV=2	Q9Y4I1	902	Q9Y4I1_K902	50.805	RMMAK(1)RELK(1)K	3	-3.1058
sp|Q9Y4I1|MYO5A_HUMAN Unconventional myosin-Va OS=Homo sapiens OX=9606 GN=MYO5A PE=1 SV=2	Q9Y4I1	906	Q9Y4I1_K906	50.805	RMMAK(1)RELK(1)K	3	-3.1058
sp|Q9Y5B9|SP16H_HUMAN FACT complex subunit SPT16 OS=Homo sapiens OX=9606 GN=SUPT16H PE=1 SV=1	Q9Y5B9	1043	Q9Y5B9_K1043	67.113	HSSAPPK(1)K(1)K	2	-0.5045
sp|Q9Y5B9|SP16H_HUMAN FACT complex subunit SPT16 OS=Homo sapiens OX=9606 GN=SUPT16H PE=1 SV=1	Q9Y5B9	1044	Q9Y5B9_K1044	67.113	HSSAPPK(1)K(1)K	2	-0.5045
sp|Q9Y5S9|RBM8A_HUMAN RNA-binding protein 8A OS=Homo sapiens OX=9606 GN=RBM8A PE=1 SV=1	Q9Y5S9	27	Q9Y5S9_K27	42.347	ADVLDLHEAGGEDFAMDEDGDESIHK(1)LK	3	0.56625
sp|Q9Y623|MYH4_HUMAN Myosin-4 OS=Homo sapiens OX=9606 GN=MYH4 PE=2 SV=2	Q9Y623	1874	Q9Y623_K1874	70.802	LQDLVDK(1)LQTK(1)VK	3	-3.6073
sp|Q9Y623|MYH4_HUMAN Myosin-4 OS=Homo sapiens OX=9606 GN=MYH4 PE=2 SV=2	Q9Y623	1878	Q9Y623_K1878	70.802	LQDLVDK(1)LQTK(1)VK	3	-3.6073
sp|Q9Y657|SPIN1_HUMAN Spindlin-1 OS=Homo sapiens OX=9606 GN=SPIN1 PE=1 SV=3	Q9Y657	2	Q9Y657_K2	96.866	MK(1)TPFGK(1)TPGQR	2	0.74929
sp|Q9Y657|SPIN1_HUMAN Spindlin-1 OS=Homo sapiens OX=9606 GN=SPIN1 PE=1 SV=3	Q9Y657	7	Q9Y657_K7	96.866	MK(1)TPFGK(1)TPGQR	2	0.74929
sp|Q9Y6X8|ZHX2_HUMAN Zinc fingers and homeoboxes protein 2 OS=Homo sapiens OX=9606 GN=ZHX2 PE=1 SV=1	Q9Y6X8	193	Q9Y6X8_K193	55.084	PK(1)ADAK(1)K	1	0.79744
sp|Q9Y6X8|ZHX2_HUMAN Zinc fingers and homeoboxes protein 2 OS=Homo sapiens OX=9606 GN=ZHX2 PE=1 SV=1	Q9Y6X8	197	Q9Y6X8_K197	55.084	PK(1)ADAK(1)K	1	0.79744
