# Supplementary material for: A constitutional isomer selective chemical proteomic strategy for system-wide profiling of protein lysine 5-hydroxylation
Source: Chem Sci. 2024 Oct 8;15(44):18395–404. doi: 10.1039/d4sc05397d (PMC11474802; doi:10.1039/d4sc05397d)
Supplement: SC-015-D4SC05397D-s004 [file SC-015-D4SC05397D-s004.xlsx]

## Sheet: HexNAc_methoxySites
Fasta headers	Proteins	Positions within proteins	Score	HexNAc_methoxy Probabilities	Charge	Mass error [ppm]
tr|A0A804HID5|A0A804HID5_HUMAN Uncharacterized protein OS=Homo sapiens OX=9606 GN=LOC127898562 PE=4 SV=1	A0A804HID5	5	42.52	MS(0.606)GPS(0.723)S(0.671)GEGGAGGRR	2	-0.11863
tr|A0A804HID5|A0A804HID5_HUMAN Uncharacterized protein OS=Homo sapiens OX=9606 GN=LOC127898562 PE=4 SV=1	A0A804HID5	6	42.52	MS(0.606)GPS(0.723)S(0.671)GEGGAGGRR	2	-0.11863
sp|A0AVK6|E2F8_HUMAN Transcription factor E2F8 OS=Homo sapiens OX=9606 GN=E2F8 PE=1 SV=1	A0AVK6	427	45.14	T(0.004)NKAES(0.467)S(0.53)QNS(0.702)APFPS(0.297)K	2	1.7849
sp|A0AVK6|E2F8_HUMAN Transcription factor E2F8 OS=Homo sapiens OX=9606 GN=E2F8 PE=1 SV=1	A0AVK6	430	45.14	T(0.004)NKAES(0.467)S(0.53)QNS(0.702)APFPS(0.297)K	2	1.7849
sp|A5YKK6|CNOT1_HUMAN CCR4-NOT transcription complex subunit 1 OS=Homo sapiens OX=9606 GN=CNOT1 PE=1 SV=2	A5YKK6	1466	46.404	NLT(0.004)AGMAMIT(0.152)CREPLLMS(0.223)IS(0.806)T(0.815)NLK	4	-0.7916
sp|A6NKB5|PCX2_HUMAN Pecanex-like protein 2 OS=Homo sapiens OX=9606 GN=PCNX2 PE=1 SV=3	A6NKB5	1972	50.536	QT(0.035)FLQT(0.206)S(0.206)T(0.084)S(0.329)VHELAQRLS(0.105)GS(0.035)R	3	2.3872
sp|A7E2V4|ZSWM8_HUMAN Zinc finger SWIM domain-containing protein 8 OS=Homo sapiens OX=9606 GN=ZSWIM8 PE=1 SV=1	A7E2V4	927	64.52	PVLPLMLAS(0.998)FIFDVLCAPGS(0.002)R	3	-1.9429
sp|A8CG34|P121C_HUMAN Nuclear envelope pore membrane protein POM 121C OS=Homo sapiens OX=9606 GN=POM121C PE=1 SV=3;sp|Q96HA1|P121A_HUMAN Nuclear envelope pore membrane protein POM 121 OS=Homo sapiens OX=9606 GN=POM121 PE=1 SV=2	A8CG34;Q96HA1	671;694	265.09	APPTLQAETATKPQAT(0.861)S(0.861)APS(0.278)PAPK	2	-1.0215
sp|A8CG34|P121C_HUMAN Nuclear envelope pore membrane protein POM 121C OS=Homo sapiens OX=9606 GN=POM121C PE=1 SV=3;sp|Q96HA1|P121A_HUMAN Nuclear envelope pore membrane protein POM 121 OS=Homo sapiens OX=9606 GN=POM121 PE=1 SV=2	A8CG34;Q96HA1	674;697	180.03	APPT(0.009)LQAET(0.005)AT(0.001)KPQAT(0.001)S(0.182)APS(0.803)PAPK	3	-0.29276
sp|A8CG34|P121C_HUMAN Nuclear envelope pore membrane protein POM 121C OS=Homo sapiens OX=9606 GN=POM121C PE=1 SV=3	A8CG34	967	40.545	PALT(0.032)PS(0.186)FGS(0.186)S(0.186)FT(0.186)FGNS(0.186)AAPAPAT(0.03)APT(0.001)PAPAS(0.008)TIK	3	0.55381
sp|A8CG34|P121C_HUMAN Nuclear envelope pore membrane protein POM 121C OS=Homo sapiens OX=9606 GN=POM121C PE=1 SV=3	A8CG34	970	40.545	PALT(0.032)PS(0.186)FGS(0.186)S(0.186)FT(0.186)FGNS(0.186)AAPAPAT(0.03)APT(0.001)PAPAS(0.008)TIK	3	0.55381
sp|A8CG34|P121C_HUMAN Nuclear envelope pore membrane protein POM 121C OS=Homo sapiens OX=9606 GN=POM121C PE=1 SV=3	A8CG34	971	40.545	PALT(0.032)PS(0.186)FGS(0.186)S(0.186)FT(0.186)FGNS(0.186)AAPAPAT(0.03)APT(0.001)PAPAS(0.008)TIK	3	0.55381
sp|A8CG34|P121C_HUMAN Nuclear envelope pore membrane protein POM 121C OS=Homo sapiens OX=9606 GN=POM121C PE=1 SV=3	A8CG34	977	50.036	PALT(0.013)PS(0.056)FGS(0.133)S(0.133)FT(0.286)FGNS(0.375)AAPAPAT(0.002)APTPAPAS(0.001)TIK	4	-0.40409
sp|A8CG34|P121C_HUMAN Nuclear envelope pore membrane protein POM 121C OS=Homo sapiens OX=9606 GN=POM121C PE=1 SV=3	A8CG34	992	48.931	PALT(0.004)PS(0.029)FGS(0.029)S(0.029)FT(0.022)FGNS(0.029)AAPAPAT(0.104)APT(0.004)PAPAS(0.751)T(0.001)IK	3	0.15104
sp|A8MYZ0|MIY4B_HUMAN Inactive ubiquitin carboxyl-terminal hydrolase MINDY-4B OS=Homo sapiens OX=9606 GN=MINDY4B PE=3 SV=3	A8MYZ0	266	57.175	GEGSHGVILFLYS(0.556)LIFS(0.444)R	2	-0.21907
sp|A8MYZ0|MIY4B_HUMAN Inactive ubiquitin carboxyl-terminal hydrolase MINDY-4B OS=Homo sapiens OX=9606 GN=MINDY4B PE=3 SV=3	A8MYZ0	270	56.205	GEGSHGVILFLYS(0.5)LIFS(0.5)R	2	0.68944
sp|D6RIA3|CD054_HUMAN Uncharacterized protein C4orf54 OS=Homo sapiens OX=9606 GN=C4orf54 PE=2 SV=1	D6RIA3	939	67.563	S(0.997)QNS(0.998)AFRS(0.006)WK	3	0.050171
sp|D6RIA3|CD054_HUMAN Uncharacterized protein C4orf54 OS=Homo sapiens OX=9606 GN=C4orf54 PE=2 SV=1	D6RIA3	942	67.563	S(0.997)QNS(0.998)AFRS(0.006)WK	3	0.050171
sp|E9PAV3|NACAM_HUMAN Nascent polypeptide-associated complex subunit alpha, muscle-specific form OS=Homo sapiens OX=9606 GN=NACA PE=1 SV=1	E9PAV3	1018	77.644	GAPT(0.001)PPAVT(0.017)PPS(0.982)PK	2	0.43099
sp|E9PAV3|NACAM_HUMAN Nascent polypeptide-associated complex subunit alpha, muscle-specific form OS=Homo sapiens OX=9606 GN=NACA PE=1 SV=1	E9PAV3	1190	43.164	GAPT(0.005)T(0.012)PAAT(0.056)PPS(0.034)PKGGLAT(0.447)PS(0.447)PK	3	0.43333
sp|G9CGD6|CNIPF_HUMAN CNK3/IPCEF1 fusion protein OS=Homo sapiens OX=9606 GN=CNK3/IPCEF1 PE=1 SV=1;sp|Q6P9H4|CNKR3_HUMAN Connector enhancer of kinase suppressor of ras 3 OS=Homo sapiens OX=9606 GN=CNKSR3 PE=1 SV=1	G9CGD6;Q6P9H4	8;8	69.846	MEPVTKWS(1)PK	3	4.4905
sp|O00193|SMAP_HUMAN Small acidic protein OS=Homo sapiens OX=9606 GN=SMAP PE=1 SV=1	O00193	2	46.462	S(1)AARES(1)HPHGVK	2	-0.59122
sp|O00193|SMAP_HUMAN Small acidic protein OS=Homo sapiens OX=9606 GN=SMAP PE=1 SV=1	O00193	7	46.462	S(1)AARES(1)HPHGVK	2	-0.59122
sp|O00268|TAF4_HUMAN Transcription initiation factor TFIID subunit 4 OS=Homo sapiens OX=9606 GN=TAF4 PE=1 SV=2	O00268	528	179.67	QVS(1)QAQTTVQPSATLQR	2	-0.28746
sp|O14497|ARI1A_HUMAN AT-rich interactive domain-containing protein 1A OS=Homo sapiens OX=9606 GN=ARID1A PE=1 SV=3	O14497	241	79.877	GGT(0.096)PGS(0.723)GAAAAAGS(0.177)KPPPS(0.001)S(0.001)S(0.001)ASASSSSSSFAQQR	4	-0.52981
sp|O14497|ARI1A_HUMAN AT-rich interactive domain-containing protein 1A OS=Homo sapiens OX=9606 GN=ARID1A PE=1 SV=3	O14497	249	89.793	GGT(0.002)PGS(0.076)GAAAAAGS(0.899)KPPPS(0.003)S(0.003)S(0.002)AS(0.001)AS(0.001)S(0.001)S(0.001)S(0.003)S(0.003)S(0.003)FAQQR	3	-0.39027
sp|O14497|ARI1A_HUMAN AT-rich interactive domain-containing protein 1A OS=Homo sapiens OX=9606 GN=ARID1A PE=1 SV=3	O14497	255	54.326	GGT(0.169)PGS(0.123)GAAAAAGS(0.123)KPPPS(0.173)S(0.194)S(0.173)AS(0.004)AS(0.004)S(0.004)S(0.004)S(0.004)S(0.004)S(0.019)FAQQR	4	-0.062972
sp|O14497|ARI1A_HUMAN AT-rich interactive domain-containing protein 1A OS=Homo sapiens OX=9606 GN=ARID1A PE=1 SV=3	O14497	128	52.925	PALNNNLT(0.044)EPPGGGGGGS(0.493)S(0.423)DGVGAPPHS(0.039)AAAALPPPAYGFGQPYGR	4	-0.083709
sp|O14974|MYPT1_HUMAN Protein phosphatase 1 regulatory subunit 12A OS=Homo sapiens OX=9606 GN=PPP1R12A PE=1 SV=1	O14974	625	42.269	DS(0.166)VPT(0.157)AVT(0.157)IPVAPT(0.157)VVNAAAS(0.157)T(0.044)T(0.049)T(0.049)LT(0.006)T(0.006)T(0.002)T(0.002)AGTVS(0.024)S(0.024)TTEVR	3	0.1901
sp|O14974|MYPT1_HUMAN Protein phosphatase 1 regulatory subunit 12A OS=Homo sapiens OX=9606 GN=PPP1R12A PE=1 SV=1	O14974	564	45.703	RQDDLIS(0.339)S(0.339)S(0.123)VPS(0.046)T(0.001)T(0.002)S(0.063)T(0.002)PT(0.006)VT(0.015)S(0.063)AAGLQK	3	0.68536
sp|O14974|MYPT1_HUMAN Protein phosphatase 1 regulatory subunit 12A OS=Homo sapiens OX=9606 GN=PPP1R12A PE=1 SV=1	O14974	565	44.903	RQDDLIS(0.339)S(0.339)S(0.123)VPS(0.046)T(0.001)T(0.002)S(0.063)T(0.002)PT(0.006)VT(0.015)S(0.063)AAGLQK	3	0.68536
sp|O14974|MYPT1_HUMAN Protein phosphatase 1 regulatory subunit 12A OS=Homo sapiens OX=9606 GN=PPP1R12A PE=1 SV=1	O14974	566	41.603	RQDDLIS(0.212)S(0.212)S(0.258)VPS(0.114)T(0.019)T(0.019)S(0.114)T(0.023)PT(0.006)VT(0.005)S(0.02)AAGLQK	3	0.14972
sp|O14974|MYPT1_HUMAN Protein phosphatase 1 regulatory subunit 12A OS=Homo sapiens OX=9606 GN=PPP1R12A PE=1 SV=1	O14974	569	58.858	RQDDLIS(0.14)S(0.14)S(0.14)VPS(0.346)T(0.084)T(0.105)S(0.018)T(0.021)PT(0.002)VT(0.001)S(0.004)AAGLQK	3	-0.020554
sp|O14974|MYPT1_HUMAN Protein phosphatase 1 regulatory subunit 12A OS=Homo sapiens OX=9606 GN=PPP1R12A PE=1 SV=1	O14974	572	40.625	RQDDLIS(0.101)S(0.109)S(0.113)VPS(0.082)T(0.071)T(0.157)S(0.357)T(0.333)PT(0.274)VT(0.155)S(0.25)AAGLQK	3	-0.34323
sp|O14974|MYPT1_HUMAN Protein phosphatase 1 regulatory subunit 12A OS=Homo sapiens OX=9606 GN=PPP1R12A PE=1 SV=1	O14974	578	55.977	RQDDLIS(0.015)S(0.045)S(0.045)VPS(0.055)T(0.007)T(0.007)S(0.179)T(0.02)PT(0.009)VT(0.009)S(0.609)AAGLQK	3	-0.16997
sp|O15164|TIF1A_HUMAN Transcription intermediary factor 1-alpha OS=Homo sapiens OX=9606 GN=TRIM24 PE=1 SV=3	O15164	572	46.898	QWQIS(0.143)S(0.143)GQGT(0.143)PS(0.143)T(0.143)T(0.143)NS(0.036)T(0.01)S(0.019)S(0.019)T(0.001)PS(0.019)S(0.019)PTITS(0.019)AAGYDGK	3	-0.46131
sp|O15164|TIF1A_HUMAN Transcription intermediary factor 1-alpha OS=Homo sapiens OX=9606 GN=TRIM24 PE=1 SV=3	O15164	573	50.322	QWQIS(0.056)S(0.157)GQGT(0.376)PS(0.314)T(0.315)T(0.315)NS(0.251)T(0.072)S(0.072)S(0.023)T(0.02)PS(0.008)S(0.008)PT(0.007)IT(0.001)S(0.006)AAGYDGK	3	-0.11046
sp|O15164|TIF1A_HUMAN Transcription intermediary factor 1-alpha OS=Homo sapiens OX=9606 GN=TRIM24 PE=1 SV=3	O15164	579	55.702	QWQIS(0.056)S(0.157)GQGT(0.376)PS(0.314)T(0.315)T(0.315)NS(0.251)T(0.072)S(0.072)S(0.023)T(0.02)PS(0.008)S(0.008)PT(0.007)IT(0.001)S(0.006)AAGYDGK	3	-0.11046
sp|O15164|TIF1A_HUMAN Transcription intermediary factor 1-alpha OS=Homo sapiens OX=9606 GN=TRIM24 PE=1 SV=3	O15164	583	53.819	QWQIS(0.053)S(0.053)GQGT(0.056)PS(0.207)T(0.211)T(0.211)NS(0.208)T(0.215)S(0.208)S(0.208)T(0.209)PS(0.066)S(0.05)PT(0.012)IT(0.001)S(0.034)AAGYDGK	3	0.53028
sp|O15164|TIF1A_HUMAN Transcription intermediary factor 1-alpha OS=Homo sapiens OX=9606 GN=TRIM24 PE=1 SV=3	O15164	585	53.819	QWQIS(0.053)S(0.053)GQGT(0.056)PS(0.207)T(0.211)T(0.211)NS(0.208)T(0.215)S(0.208)S(0.208)T(0.209)PS(0.066)S(0.05)PT(0.012)IT(0.001)S(0.034)AAGYDGK	3	0.53028
sp|O15164|TIF1A_HUMAN Transcription intermediary factor 1-alpha OS=Homo sapiens OX=9606 GN=TRIM24 PE=1 SV=3	O15164	586	53.819	QWQIS(0.053)S(0.053)GQGT(0.056)PS(0.207)T(0.211)T(0.211)NS(0.208)T(0.215)S(0.208)S(0.208)T(0.209)PS(0.066)S(0.05)PT(0.012)IT(0.001)S(0.034)AAGYDGK	3	0.53028
sp|O43157|PLXB1_HUMAN Plexin-B1 OS=Homo sapiens OX=9606 GN=PLXNB1 PE=1 SV=3	O43157	1980	53.567	T(1)NS(1)LPLRFWINIIK	2	-0.26258
sp|O43432|IF4G3_HUMAN Eukaryotic translation initiation factor 4 gamma 3 OS=Homo sapiens OX=9606 GN=EIF4G3 PE=1 SV=2	O43432	277	44.863	S(0.413)T(0.413)IAAPT(0.111)S(0.032)S(0.012)ALS(0.009)S(0.009)QPIFTTAIDDR	3	-0.53043
sp|O43432|IF4G3_HUMAN Eukaryotic translation initiation factor 4 gamma 3 OS=Homo sapiens OX=9606 GN=EIF4G3 PE=1 SV=2	O43432	284	40.402	S(0.101)T(0.036)IAAPT(0.281)S(0.281)S(0.118)ALS(0.101)S(0.082)QPIFTTAIDDR	3	-0.43883
sp|O43866|CD5L_HUMAN CD5 antigen-like OS=Homo sapiens OX=9606 GN=CD5L PE=1 SV=1	O43866	6	48.115	ALLFS(0.966)LILAICT(0.034)R	3	0.58303
sp|O60641|AP180_HUMAN Clathrin coat assembly protein AP180 OS=Homo sapiens OX=9606 GN=SNAP91 PE=1 SV=2	O60641	305	62.338	S(0.486)S(0.486)PAT(0.022)T(0.005)VTS(0.001)PNS(0.001)TPAK	2	0.62244
sp|O60641|AP180_HUMAN Clathrin coat assembly protein AP180 OS=Homo sapiens OX=9606 GN=SNAP91 PE=1 SV=2	O60641	306	62.338	S(0.486)S(0.486)PAT(0.022)T(0.005)VTS(0.001)PNS(0.001)TPAK	2	0.62244
sp|O75030|MITF_HUMAN Microphthalmia-associated transcription factor OS=Homo sapiens OX=9606 GN=MITF PE=1 SV=2	O75030	101	40.208	VPVS(0.024)QT(0.002)PAINVS(0.274)VPT(0.274)T(0.274)LPS(0.112)AT(0.039)QVPMEVLK	4	0.11527
sp|O75069|TMCC2_HUMAN Transmembrane and coiled-coil domains protein 2 OS=Homo sapiens OX=9606 GN=TMCC2 PE=1 SV=3	O75069	409	41.871	GS(0.275)LS(0.286)GLS(0.272)QAT(0.654)HT(0.191)AVVS(0.321)KPR	2	1.4572
sp|O75069|TMCC2_HUMAN Transmembrane and coiled-coil domains protein 2 OS=Homo sapiens OX=9606 GN=TMCC2 PE=1 SV=3	O75069	411	41.871	GS(0.275)LS(0.286)GLS(0.272)QAT(0.654)HT(0.191)AVVS(0.321)KPR	2	1.4572
sp|O75069|TMCC2_HUMAN Transmembrane and coiled-coil domains protein 2 OS=Homo sapiens OX=9606 GN=TMCC2 PE=1 SV=3	O75069	423	46.592	GS(0.022)LS(0.022)GLS(0.029)QAT(0.052)HT(0.947)AVVS(0.929)KPR	2	1.5395
sp|O75179|ANR17_HUMAN Ankyrin repeat domain-containing protein 17 OS=Homo sapiens OX=9606 GN=ANKRD17 PE=1 SV=3	O75179	1820	64.534	IGS(0.638)S(0.255)APT(0.012)TTAANTS(0.095)LMGIK	2	1.795
sp|O75179|ANR17_HUMAN Ankyrin repeat domain-containing protein 17 OS=Homo sapiens OX=9606 GN=ANKRD17 PE=1 SV=3	O75179	1831	71.685	IGS(0.31)S(0.31)APTTTAANTS(0.38)LMGIK	2	-0.053756
sp|O75376|NCOR1_HUMAN Nuclear receptor corepressor 1 OS=Homo sapiens OX=9606 GN=NCOR1 PE=1 SV=2	O75376	2069	57.21	NQVS(0.322)S(0.322)QT(0.322)PQQPPT(0.016)S(0.016)T(0.002)FQNSPSALVSTPVR	3	-0.14467
sp|O75376|NCOR1_HUMAN Nuclear receptor corepressor 1 OS=Homo sapiens OX=9606 GN=NCOR1 PE=1 SV=2	O75376	2070	57.21	NQVS(0.322)S(0.322)QT(0.322)PQQPPT(0.016)S(0.016)T(0.002)FQNSPSALVSTPVR	3	-0.14467
sp|O75376|NCOR1_HUMAN Nuclear receptor corepressor 1 OS=Homo sapiens OX=9606 GN=NCOR1 PE=1 SV=2	O75376	2	51.463	S(0.357)S(0.357)S(0.284)GYPPNQGAFS(0.001)TEQS(0.001)R	2	-0.22948
sp|O75376|NCOR1_HUMAN Nuclear receptor corepressor 1 OS=Homo sapiens OX=9606 GN=NCOR1 PE=1 SV=2	O75376	3	51.463	S(0.357)S(0.357)S(0.284)GYPPNQGAFS(0.001)TEQS(0.001)R	2	-0.22948
sp|O75376|NCOR1_HUMAN Nuclear receptor corepressor 1 OS=Homo sapiens OX=9606 GN=NCOR1 PE=1 SV=2	O75376	14	44.312	S(0.077)S(0.077)S(0.077)GYPPNQGAFS(0.684)T(0.012)EQS(0.071)R	2	-0.55753
sp|O75376|NCOR1_HUMAN Nuclear receptor corepressor 1 OS=Homo sapiens OX=9606 GN=NCOR1 PE=1 SV=2	O75376	18	68.481	S(0.031)S(0.031)S(0.028)GYPPNQGAFS(0.39)T(0.002)EQS(0.517)R	2	-0.16273
sp|O75628|REM1_HUMAN GTP-binding protein REM 1 OS=Homo sapiens OX=9606 GN=REM1 PE=1 SV=2	O75628	18	73.233	AS(0.904)T(0.096)PLPLS(1)PR	3	-0.26194
sp|O75628|REM1_HUMAN GTP-binding protein REM 1 OS=Homo sapiens OX=9606 GN=REM1 PE=1 SV=2	O75628	24	73.233	AS(0.904)T(0.096)PLPLS(1)PR	3	-0.26194
sp|O75891|AL1L1_HUMAN Cytosolic 10-formyltetrahydrofolate dehydrogenase OS=Homo sapiens OX=9606 GN=ALDH1L1 PE=1 SV=2	O75891	9	44.662	KIAVIGQS(1)LFGQEVYCHLR	2	2.7342
sp|O94782|UBP1_HUMAN Ubiquitin carboxyl-terminal hydrolase 1 OS=Homo sapiens OX=9606 GN=USP1 PE=1 SV=1	O94782	66	40.968	AS(0.01)EIDQVVPAAQS(0.766)S(0.224)PINCEK	3	-0.17626
sp|O94827|PKHG5_HUMAN Pleckstrin homology domain-containing family G member 5 OS=Homo sapiens OX=9606 GN=PLEKHG5 PE=1 SV=4	O94827	251	44.816	FS(0.937)GFFS(0.504)S(0.462)GPS(0.051)T(0.001)S(0.044)AFGR	3	-0.70799
sp|O94827|PKHG5_HUMAN Pleckstrin homology domain-containing family G member 5 OS=Homo sapiens OX=9606 GN=PLEKHG5 PE=1 SV=4	O94827	255	44.816	FS(0.937)GFFS(0.504)S(0.462)GPS(0.051)T(0.001)S(0.044)AFGR	3	-0.70799
sp|O94842|TOX4_HUMAN TOX high mobility group box family member 4 OS=Homo sapiens OX=9606 GN=TOX4 PE=1 SV=1	O94842	406	87.519	GLQLGQT(0.436)S(0.436)T(0.089)AT(0.004)IQPS(0.035)QQAQIVTR	2	0.52003
sp|O94842|TOX4_HUMAN TOX high mobility group box family member 4 OS=Homo sapiens OX=9606 GN=TOX4 PE=1 SV=1	O94842	413	69.016	GLQLGQT(0.039)S(0.369)T(0.044)AT(0.044)IQPS(0.504)QQAQIVTR	3	-0.24485
sp|O95487|SC24B_HUMAN Protein transport protein Sec24B OS=Homo sapiens OX=9606 GN=SEC24B PE=1 SV=2	O95487	310	74.133	S(0.427)S(0.427)PVVS(0.003)TVLS(0.003)GS(0.003)S(0.032)GS(0.032)S(0.032)S(0.04)TR	2	0.38393
sp|O95487|SC24B_HUMAN Protein transport protein Sec24B OS=Homo sapiens OX=9606 GN=SEC24B PE=1 SV=2	O95487	311	74.133	S(0.427)S(0.427)PVVS(0.003)TVLS(0.003)GS(0.003)S(0.032)GS(0.032)S(0.032)S(0.04)TR	2	0.38393
sp|O95487|SC24B_HUMAN Protein transport protein Sec24B OS=Homo sapiens OX=9606 GN=SEC24B PE=1 SV=2	O95487	315	57.106	S(0.096)S(0.096)PVVS(0.416)T(0.019)VLS(0.096)GS(0.096)S(0.096)GS(0.029)S(0.029)S(0.029)TR	2	0.62999
sp|O95487|SC24B_HUMAN Protein transport protein Sec24B OS=Homo sapiens OX=9606 GN=SEC24B PE=1 SV=2	O95487	319	51.535	S(0.061)S(0.061)PVVS(0.019)T(0.007)VLS(0.142)GS(0.142)S(0.142)GS(0.142)S(0.142)S(0.142)TR	2	-0.58784
sp|O95487|SC24B_HUMAN Protein transport protein Sec24B OS=Homo sapiens OX=9606 GN=SEC24B PE=1 SV=2	O95487	321	65.808	S(0.04)S(0.04)PVVS(0.046)T(0.009)VLS(0.046)GS(0.163)S(0.163)GS(0.163)S(0.163)S(0.163)TR	2	-0.15347
sp|O95487|SC24B_HUMAN Protein transport protein Sec24B OS=Homo sapiens OX=9606 GN=SEC24B PE=1 SV=2	O95487	322	65.808	S(0.04)S(0.04)PVVS(0.046)T(0.009)VLS(0.046)GS(0.163)S(0.163)GS(0.163)S(0.163)S(0.163)TR	2	-0.15347
sp|O95487|SC24B_HUMAN Protein transport protein Sec24B OS=Homo sapiens OX=9606 GN=SEC24B PE=1 SV=2	O95487	324	92.307	S(0.059)S(0.059)PVVS(0.059)T(0.001)VLS(0.059)GS(0.041)S(0.041)GS(0.227)S(0.227)S(0.227)TR	2	-0.17186
sp|O95487|SC24B_HUMAN Protein transport protein Sec24B OS=Homo sapiens OX=9606 GN=SEC24B PE=1 SV=2	O95487	325	92.307	S(0.059)S(0.059)PVVS(0.059)T(0.001)VLS(0.059)GS(0.041)S(0.041)GS(0.227)S(0.227)S(0.227)TR	2	-0.17186
sp|O95487|SC24B_HUMAN Protein transport protein Sec24B OS=Homo sapiens OX=9606 GN=SEC24B PE=1 SV=2	O95487	326	136.43	S(0.002)S(0.002)PVVS(0.002)TVLS(0.001)GS(0.004)S(0.004)GS(0.004)S(0.004)S(0.975)TR	2	-0.00074257
sp|O95487|SC24B_HUMAN Protein transport protein Sec24B OS=Homo sapiens OX=9606 GN=SEC24B PE=1 SV=2	O95487	342	59.263	TPPT(0.001)ANHPVEPVT(0.006)S(0.833)VT(0.08)QPS(0.08)ELLQQK	3	-0.20777
sp|O95487|SC24B_HUMAN Protein transport protein Sec24B OS=Homo sapiens OX=9606 GN=SEC24B PE=1 SV=2	O95487	347	44.632	TPPTANHPVEPVT(0.014)S(0.014)VT(0.014)QPS(0.958)ELLQQK	3	0.20497
sp|P00492|HPRT_HUMAN Hypoxanthine-guanine phosphoribosyltransferase OS=Homo sapiens OX=9606 GN=HPRT1 PE=1 SV=2	P00492	148	75.695	T(0.001)MQTLLS(0.999)LVR	3	3.0722
sp|P01709|LV208_HUMAN Immunoglobulin lambda variable 2-8 OS=Homo sapiens OX=9606 GN=IGLV2-8 PE=1 SV=2;sp|P01706|LV211_HUMAN Immunoglobulin lambda variable 2-11 OS=Homo sapiens OX=9606 GN=IGLV2-11 PE=1 SV=2	P01709;P01706	77;77	48.561	RPS(1)GVPDR	1	-2.6366
sp|P02545|LMNA_HUMAN Prelamin-A/C OS=Homo sapiens OX=9606 GN=LMNA PE=1 SV=1	P02545	599	136.57	AS(0.389)AS(0.279)GS(0.279)GAQVGGPIS(0.008)S(0.008)GS(0.009)S(0.009)AS(0.009)S(0.009)VTVTR	2	-0.60561
sp|P02545|LMNA_HUMAN Prelamin-A/C OS=Homo sapiens OX=9606 GN=LMNA PE=1 SV=1	P02545	601	136.57	AS(0.384)AS(0.384)GS(0.067)GAQVGGPIS(0.029)S(0.02)GS(0.029)S(0.029)AS(0.029)S(0.029)VTVTR	2	0.14217
sp|P02545|LMNA_HUMAN Prelamin-A/C OS=Homo sapiens OX=9606 GN=LMNA PE=1 SV=1	P02545	603	95.319	AS(0.143)AS(0.367)GS(0.367)GAQVGGPIS(0.014)S(0.039)GS(0.039)S(0.017)AS(0.007)S(0.007)VTVTR	3	-0.96668
sp|P02545|LMNA_HUMAN Prelamin-A/C OS=Homo sapiens OX=9606 GN=LMNA PE=1 SV=1	P02545	612	175.99	AS(0.02)AS(0.02)GS(0.02)GAQVGGPIS(0.27)S(0.27)GS(0.1)S(0.1)AS(0.1)S(0.1)VTVTR	2	-0.43494
sp|P02545|LMNA_HUMAN Prelamin-A/C OS=Homo sapiens OX=9606 GN=LMNA PE=1 SV=1	P02545	613	175.99	AS(0.02)AS(0.02)GS(0.02)GAQVGGPIS(0.27)S(0.27)GS(0.1)S(0.1)AS(0.1)S(0.1)VTVTR	2	-0.43494
sp|P02545|LMNA_HUMAN Prelamin-A/C OS=Homo sapiens OX=9606 GN=LMNA PE=1 SV=1	P02545	615	175.99	AS(0.007)AS(0.005)GS(0.005)GAQVGGPIS(0.077)S(0.077)GS(0.338)S(0.338)AS(0.077)S(0.077)VT(0.001)VTR	3	-0.11438
sp|P02545|LMNA_HUMAN Prelamin-A/C OS=Homo sapiens OX=9606 GN=LMNA PE=1 SV=1	P02545	616	175.99	AS(0.007)AS(0.005)GS(0.005)GAQVGGPIS(0.077)S(0.077)GS(0.338)S(0.338)AS(0.077)S(0.077)VT(0.001)VTR	3	-0.11438
sp|P02545|LMNA_HUMAN Prelamin-A/C OS=Homo sapiens OX=9606 GN=LMNA PE=1 SV=1	P02545	618	130.72	AS(0.003)AS(0.003)GS(0.003)GAQVGGPIS(0.079)S(0.079)GS(0.079)S(0.079)AS(0.338)S(0.338)VTVTR	3	-0.27949
sp|P02545|LMNA_HUMAN Prelamin-A/C OS=Homo sapiens OX=9606 GN=LMNA PE=1 SV=1	P02545	619	130.72	AS(0.024)AS(0.024)GS(0.024)GAQVGGPIS(0.08)S(0.052)GS(0.125)S(0.125)AS(0.125)S(0.422)VTVTR	2	-0.23334
sp|P02765|FETUA_HUMAN Alpha-2-HS-glycoprotein OS=Homo sapiens OX=9606 GN=AHSG PE=1 SV=2	P02765	325	50.188	HT(0.188)FMGVVS(0.788)LGS(0.022)PS(0.001)GEVSHPR	3	1.4422
sp|P05387|RLA2_HUMAN Large ribosomal subunit protein P2 OS=Homo sapiens OX=9606 GN=RPLP2 PE=1 SV=1	P05387	64	102.07	LAS(0.484)VPAGGAVAVS(0.484)AAPGS(0.024)AAPAAGS(0.008)APAAAEEK	3	0.016372
sp|P05387|RLA2_HUMAN Large ribosomal subunit protein P2 OS=Homo sapiens OX=9606 GN=RPLP2 PE=1 SV=1	P05387	74	65.374	LAS(0.057)VPAGGAVAVS(0.829)AAPGS(0.057)AAPAAGS(0.057)APAAAEEK	2	-0.55436
sp|P05387|RLA2_HUMAN Large ribosomal subunit protein P2 OS=Homo sapiens OX=9606 GN=RPLP2 PE=1 SV=1	P05387	79	46.449	LAS(0.208)VPAGGAVAVS(0.364)AAPGS(0.364)AAPAAGS(0.064)APAAAEEK	3	-0.47865
sp|P05387|RLA2_HUMAN Large ribosomal subunit protein P2 OS=Homo sapiens OX=9606 GN=RPLP2 PE=1 SV=1	P05387	86	47.646	LAS(0.076)VPAGGAVAVS(0.366)AAPGS(0.177)AAPAAGS(0.38)APAAAEEK	2	0.52754
sp|P06748|NPM_HUMAN Nucleophosmin OS=Homo sapiens OX=9606 GN=NPM1 PE=1 SV=2	P06748	82	47.507	MS(0.463)VQPT(0.073)VS(0.463)LGGFEIT(0.001)PPVVLR	3	0.055147
sp|P06748|NPM_HUMAN Nucleophosmin OS=Homo sapiens OX=9606 GN=NPM1 PE=1 SV=2	P06748	88	47.507	MS(0.463)VQPT(0.073)VS(0.463)LGGFEIT(0.001)PPVVLR	3	0.055147
sp|P08397|HEM3_HUMAN Porphobilinogen deaminase OS=Homo sapiens OX=9606 GN=HMBS PE=1 SV=2	P08397	2	46.063	MS(0.992)GNGNAAAT(0.017)AEENS(0.991)PKMR	2	-2.5828
sp|P08397|HEM3_HUMAN Porphobilinogen deaminase OS=Homo sapiens OX=9606 GN=HMBS PE=1 SV=2	P08397	15	46.063	MS(0.992)GNGNAAAT(0.017)AEENS(0.991)PKMR	2	-2.5828
sp|P08670|VIME_HUMAN Vimentin OS=Homo sapiens OX=9606 GN=VIM PE=1 SV=4	P08670	34	99.013	SYVTTS(1)TR	2	1.0129
sp|P08670|VIME_HUMAN Vimentin OS=Homo sapiens OX=9606 GN=VIM PE=1 SV=4	P08670	42	96.489	TYS(0.009)LGS(0.842)ALRPS(0.021)TS(0.128)R	3	0.10732
sp|P09651|ROA1_HUMAN Heterogeneous nuclear ribonucleoprotein A1 OS=Homo sapiens OX=9606 GN=HNRNPA1 PE=1 SV=5;sp|A0A2R8Y4L2|RA1L3_HUMAN Heterogeneous nuclear ribonucleoprotein A1-like 3 OS=Homo sapiens OX=9606 GN=HNRNPA1L3 PE=4 SV=2	P09651;A0A2R8Y4L2	360;308	65.265	NQGGYGGS(0.204)S(0.204)S(0.204)S(0.07)S(0.106)S(0.106)YGS(0.106)GR	2	-1.1743
sp|P09651|ROA1_HUMAN Heterogeneous nuclear ribonucleoprotein A1 OS=Homo sapiens OX=9606 GN=HNRNPA1 PE=1 SV=5;sp|A0A2R8Y4L2|RA1L3_HUMAN Heterogeneous nuclear ribonucleoprotein A1-like 3 OS=Homo sapiens OX=9606 GN=HNRNPA1L3 PE=4 SV=2	P09651;A0A2R8Y4L2	361;309	65.265	NQGGYGGS(0.204)S(0.204)S(0.204)S(0.07)S(0.106)S(0.106)YGS(0.106)GR	2	-1.1743
sp|P09651|ROA1_HUMAN Heterogeneous nuclear ribonucleoprotein A1 OS=Homo sapiens OX=9606 GN=HNRNPA1 PE=1 SV=5;sp|A0A2R8Y4L2|RA1L3_HUMAN Heterogeneous nuclear ribonucleoprotein A1-like 3 OS=Homo sapiens OX=9606 GN=HNRNPA1L3 PE=4 SV=2	P09651;A0A2R8Y4L2	362;310	65.265	NQGGYGGS(0.204)S(0.204)S(0.204)S(0.07)S(0.106)S(0.106)YGS(0.106)GR	2	-1.1743
sp|P0CJ78|ZN865_HUMAN Zinc finger protein 865 OS=Homo sapiens OX=9606 GN=ZNF865 PE=1 SV=1	P0CJ78	93	104.09	AEVPS(0.415)S(0.071)S(0.248)S(0.055)S(0.055)S(0.055)S(0.055)S(0.013)S(0.016)S(0.001)S(0.001)S(0.001)S(0.001)S(0.001)S(0.001)S(0.001)S(0.001)S(0.001)S(0.001)S(0.001)S(0.001)S(0.001)S(0.001)S(0.001)S(0.001)QAK	3	0.18773
sp|P0CJ78|ZN865_HUMAN Zinc finger protein 865 OS=Homo sapiens OX=9606 GN=ZNF865 PE=1 SV=1	P0CJ78	95	129.3	AEVPS(0.155)S(0.077)S(0.628)S(0.065)S(0.065)S(0.011)SSSSSSSSSSSSSSSSSSSQAK	3	0.78566
sp|P0CJ78|ZN865_HUMAN Zinc finger protein 865 OS=Homo sapiens OX=9606 GN=ZNF865 PE=1 SV=1	P0CJ78	96	80.608	AEVPS(0.081)S(0.029)S(0.081)S(0.284)S(0.284)S(0.081)S(0.081)S(0.024)S(0.024)S(0.003)S(0.004)S(0.002)S(0.006)S(0.002)S(0.002)S(0.001)S(0.001)S(0.001)S(0.001)S(0.001)S(0.001)S(0.001)S(0.001)S(0.001)S(0.001)QAK	3	0.32129
sp|P0CJ78|ZN865_HUMAN Zinc finger protein 865 OS=Homo sapiens OX=9606 GN=ZNF865 PE=1 SV=1	P0CJ78	97	80.608	AEVPS(0.081)S(0.029)S(0.081)S(0.284)S(0.284)S(0.081)S(0.081)S(0.024)S(0.024)S(0.003)S(0.004)S(0.002)S(0.006)S(0.002)S(0.002)S(0.001)S(0.001)S(0.001)S(0.001)S(0.001)S(0.001)S(0.001)S(0.001)S(0.001)S(0.001)QAK	3	0.32129
sp|P12270|TPR_HUMAN Nucleoprotein TPR OS=Homo sapiens OX=9606 GN=TPR PE=1 SV=3	P12270	1660	69.081	GIAS(0.335)T(0.311)S(0.311)DPPT(0.04)ANIKPTPVVS(0.001)TPS(0.001)K	3	-0.099879
sp|P12270|TPR_HUMAN Nucleoprotein TPR OS=Homo sapiens OX=9606 GN=TPR PE=1 SV=3	P12270	1662	69.081	GIAS(0.115)T(0.358)S(0.358)DPPT(0.101)ANIKPT(0.001)PVVS(0.034)TPS(0.034)K	3	0.061389
sp|P12270|TPR_HUMAN Nucleoprotein TPR OS=Homo sapiens OX=9606 GN=TPR PE=1 SV=3	P12270	1676	69.081	GIAS(0.233)T(0.068)S(0.233)DPPTANIKPTPVVS(0.233)TPS(0.233)K	2	0.86545
sp|P12270|TPR_HUMAN Nucleoprotein TPR OS=Homo sapiens OX=9606 GN=TPR PE=1 SV=3	P12270	1679	69.081	GIAS(0.233)T(0.068)S(0.233)DPPTANIKPTPVVS(0.233)TPS(0.233)K	2	0.86545
sp|P14314|GLU2B_HUMAN Glucosidase 2 subunit beta OS=Homo sapiens OX=9606 GN=PRKCSH PE=1 SV=2	P14314	282	62.287	S(0.375)EALPT(0.275)DLPAPS(0.349)APDLTEPK	3	-0.1783
sp|P14314|GLU2B_HUMAN Glucosidase 2 subunit beta OS=Homo sapiens OX=9606 GN=PRKCSH PE=1 SV=2	P14314	293	95.554	S(0.035)EALPT(0.006)DLPAPS(0.959)APDLT(0.001)EPK	3	0.14109
sp|P14616|INSRR_HUMAN Insulin receptor-related protein OS=Homo sapiens OX=9606 GN=INSRR PE=1 SV=2	P14616	666	68.383	LPT(0.139)S(0.861)NNDPR	1	-0.50326
sp|P15822|ZEP1_HUMAN Zinc finger protein 40 OS=Homo sapiens OX=9606 GN=HIVEP1 PE=1 SV=4	P15822	2330	78.903	AVAIT(0.005)QS(0.168)PS(0.294)S(0.533)VR	2	0.10706
sp|P18146|EGR1_HUMAN Early growth response protein 1 OS=Homo sapiens OX=9606 GN=EGR1 PE=1 SV=1	P18146	120	78.705	VLVET(0.01)S(0.495)YPS(0.495)QTTR	2	0.61374
sp|P18146|EGR1_HUMAN Early growth response protein 1 OS=Homo sapiens OX=9606 GN=EGR1 PE=1 SV=1	P18146	123	78.705	VLVET(0.01)S(0.495)YPS(0.495)QTTR	2	0.61374
sp|P18583|SON_HUMAN Protein SON OS=Homo sapiens OX=9606 GN=SON PE=1 SV=4	P18583	244	90.697	ILDS(1)FAAAPVPTTTLVLK	2	-0.32719
sp|P18846|ATF1_HUMAN Cyclic AMP-dependent transcription factor ATF-1 OS=Homo sapiens OX=9606 GN=ATF1 PE=1 SV=2	P18846	186	78.441	T(0.109)T(0.109)PS(0.516)AT(0.109)S(0.109)LPQT(0.035)VVMT(0.001)S(0.006)PVTLTS(0.006)QTTK	2	0.25699
sp|P18846|ATF1_HUMAN Cyclic AMP-dependent transcription factor ATF-1 OS=Homo sapiens OX=9606 GN=ATF1 PE=1 SV=2	P18846	189	73.735	T(0.042)T(0.042)PS(0.074)AT(0.184)S(0.648)LPQT(0.006)VVMTS(0.002)PVTLTS(0.002)QTTK	2	0.87656
sp|P21580|TNAP3_HUMAN Tumor necrosis factor alpha-induced protein 3 OS=Homo sapiens OX=9606 GN=TNFAIP3 PE=1 SV=1	P21580	720	54.787	CARAS(1)CK	1	-3.9336
sp|P22059|OSBP1_HUMAN Oxysterol-binding protein 1 OS=Homo sapiens OX=9606 GN=OSBP PE=1 SV=1	P22059	238	69.261	S(0.647)LS(0.357)ELES(0.996)LK	3	-1.2011
sp|P22059|OSBP1_HUMAN Oxysterol-binding protein 1 OS=Homo sapiens OX=9606 GN=OSBP PE=1 SV=1	P22059	244	69.261	S(0.647)LS(0.357)ELES(0.996)LK	3	-1.2011
sp|P22670|RFX1_HUMAN MHC class II regulatory factor RFX1 OS=Homo sapiens OX=9606 GN=RFX1 PE=1 SV=2	P22670	240	46.504	T(0.001)AGAPT(0.046)GT(0.042)VPQQLQVHGVQQS(0.82)VPVT(0.091)QER	3	0.71366
sp|P22681|CBL_HUMAN E3 ubiquitin-protein ligase CBL OS=Homo sapiens OX=9606 GN=CBL PE=1 SV=2	P22681	601	61.435	VPVS(0.971)APS(0.01)S(0.01)S(0.008)DPWTGR	2	-0.1678
sp|P22830|HEMH_HUMAN Ferrochelatase, mitochondrial OS=Homo sapiens OX=9606 GN=FECH PE=1 SV=2	P22830	254	50.404	S(0.99)EVVILFS(0.373)AHS(0.59)LPMS(0.047)VVNR	2	-4.2351
sp|P22830|HEMH_HUMAN Ferrochelatase, mitochondrial OS=Homo sapiens OX=9606 GN=FECH PE=1 SV=2	P22830	264	50.404	S(0.99)EVVILFS(0.373)AHS(0.59)LPMS(0.047)VVNR	2	-4.2351
sp|P23471|PTPRZ_HUMAN Receptor-type tyrosine-protein phosphatase zeta OS=Homo sapiens OX=9606 GN=PTPRZ1 PE=1 SV=4	P23471	1403	94.363	ATSELS(0.5)HS(0.5)AK	2	0.13026
sp|P23471|PTPRZ_HUMAN Receptor-type tyrosine-protein phosphatase zeta OS=Homo sapiens OX=9606 GN=PTPRZ1 PE=1 SV=4	P23471	1405	94.363	ATSELS(0.5)HS(0.5)AK	2	0.13026
sp|P27540|ARNT_HUMAN Aryl hydrocarbon receptor nuclear translocator OS=Homo sapiens OX=9606 GN=ARNT PE=1 SV=1	P27540	629	71.073	HS(1)NPTQGATPTWTPTTR	3	0.67689
sp|P27815|PDE4A_HUMAN 3',5'-cyclic-AMP phosphodiesterase 4A OS=Homo sapiens OX=9606 GN=PDE4A PE=1 SV=3	P27815	279	41.482	ELT(0.006)HLS(0.005)EMS(0.022)RS(0.78)GNQVS(0.698)EYIS(0.23)T(0.13)T(0.13)FLDK	3	-0.39339
sp|P27815|PDE4A_HUMAN 3',5'-cyclic-AMP phosphodiesterase 4A OS=Homo sapiens OX=9606 GN=PDE4A PE=1 SV=3	P27815	284	41.482	ELT(0.006)HLS(0.005)EMS(0.022)RS(0.78)GNQVS(0.698)EYIS(0.23)T(0.13)T(0.13)FLDK	3	-0.39339
sp|P27816|MAP4_HUMAN Microtubule-associated protein 4 OS=Homo sapiens OX=9606 GN=MAP4 PE=1 SV=3	P27816	787	90.348	AS(0.4)PS(0.4)KPAS(0.036)APAS(0.164)R	3	-0.4202
sp|P27816|MAP4_HUMAN Microtubule-associated protein 4 OS=Homo sapiens OX=9606 GN=MAP4 PE=1 SV=3	P27816	789	90.348	AS(0.205)PS(0.61)KPAS(0.068)APAS(0.116)R	3	-0.18407
sp|P27816|MAP4_HUMAN Microtubule-associated protein 4 OS=Homo sapiens OX=9606 GN=MAP4 PE=1 SV=3	P27816	793	109.11	PAS(0.587)APAS(0.413)R	2	-0.58603
sp|P27816|MAP4_HUMAN Microtubule-associated protein 4 OS=Homo sapiens OX=9606 GN=MAP4 PE=1 SV=3	P27816	797	101.46	ASPSKPAS(0.017)APAS(0.983)R	2	-0.34518
sp|P27824|CALX_HUMAN Calnexin OS=Homo sapiens OX=9606 GN=CANX PE=1 SV=2	P27824	74	62.377	APVPT(0.446)GEVYFADS(0.554)FDR	2	-0.29984
sp|P32121|ARRB2_HUMAN Beta-arrestin-2 OS=Homo sapiens OX=9606 GN=ARRB2 PE=1 SV=2	P32121	337	62.68	GGDVS(1)VELPFVLMHPK	3	0.83134
sp|P35453|HXD13_HUMAN Homeobox protein Hox-D13 OS=Homo sapiens OX=9606 GN=HOXD13 PE=1 SV=3	P35453	25	95.71	ADGGGAGGAPAS(0.546)S(0.1)S(0.067)S(0.067)S(0.067)S(0.067)VAAAAAS(0.087)GQCR	2	1.0387
sp|P35453|HXD13_HUMAN Homeobox protein Hox-D13 OS=Homo sapiens OX=9606 GN=HOXD13 PE=1 SV=3	P35453	26	95.71	ADGGGAGGAPAS(0.16)S(0.16)S(0.16)S(0.16)S(0.16)S(0.16)VAAAAAS(0.037)GQCR	3	-2.7216
sp|P35453|HXD13_HUMAN Homeobox protein Hox-D13 OS=Homo sapiens OX=9606 GN=HOXD13 PE=1 SV=3	P35453	27	95.71	ADGGGAGGAPAS(0.16)S(0.16)S(0.16)S(0.16)S(0.16)S(0.16)VAAAAAS(0.037)GQCR	3	-2.7216
sp|P35453|HXD13_HUMAN Homeobox protein Hox-D13 OS=Homo sapiens OX=9606 GN=HOXD13 PE=1 SV=3	P35453	28	95.71	ADGGGAGGAPAS(0.16)S(0.16)S(0.16)S(0.16)S(0.16)S(0.16)VAAAAAS(0.037)GQCR	3	-2.7216
sp|P35453|HXD13_HUMAN Homeobox protein Hox-D13 OS=Homo sapiens OX=9606 GN=HOXD13 PE=1 SV=3	P35453	29	95.71	ADGGGAGGAPAS(0.16)S(0.16)S(0.16)S(0.16)S(0.16)S(0.16)VAAAAAS(0.037)GQCR	3	-2.7216
sp|P35453|HXD13_HUMAN Homeobox protein Hox-D13 OS=Homo sapiens OX=9606 GN=HOXD13 PE=1 SV=3	P35453	30	95.71	ADGGGAGGAPAS(0.16)S(0.16)S(0.16)S(0.16)S(0.16)S(0.16)VAAAAAS(0.037)GQCR	3	-2.7216
sp|P35453|HXD13_HUMAN Homeobox protein Hox-D13 OS=Homo sapiens OX=9606 GN=HOXD13 PE=1 SV=3	P35453	37	95.71	ADGGGAGGAPAS(0.008)S(0.029)S(0.029)S(0.124)S(0.124)S(0.124)VAAAAAS(0.564)GQCR	3	-0.99142
sp|P35658|NU214_HUMAN Nuclear pore complex protein Nup214 OS=Homo sapiens OX=9606 GN=NUP214 PE=1 SV=2	P35658	1353	96.756	AS(0.429)S(0.429)T(0.082)S(0.031)LTS(0.031)TQPTK	2	0.030571
sp|P35658|NU214_HUMAN Nuclear pore complex protein Nup214 OS=Homo sapiens OX=9606 GN=NUP214 PE=1 SV=2	P35658	1354	157.78	AS(0.005)S(0.866)T(0.104)S(0.013)LTS(0.013)TQPTK	2	-0.14503
sp|P35658|NU214_HUMAN Nuclear pore complex protein Nup214 OS=Homo sapiens OX=9606 GN=NUP214 PE=1 SV=2	P35658	1356	131.06	AS(0.044)S(0.361)T(0.016)S(0.361)LTS(0.218)TQPTK	2	-0.013671
sp|P35658|NU214_HUMAN Nuclear pore complex protein Nup214 OS=Homo sapiens OX=9606 GN=NUP214 PE=1 SV=2	P35658	1359	131.06	AS(0.045)S(0.318)TS(0.318)LTS(0.318)TQPTK	2	-0.57632
sp|P35658|NU214_HUMAN Nuclear pore complex protein Nup214 OS=Homo sapiens OX=9606 GN=NUP214 PE=1 SV=2	P35658	597	89.669	FTAAAT(0.046)S(0.82)T(0.059)PVS(0.035)S(0.012)S(0.002)QS(0.002)APPMS(0.006)PFS(0.006)S(0.006)AS(0.006)K	2	-0.067672
sp|P35658|NU214_HUMAN Nuclear pore complex protein Nup214 OS=Homo sapiens OX=9606 GN=NUP214 PE=1 SV=2	P35658	601	55.094	FT(0.005)AAAT(0.094)S(0.094)T(0.273)PVS(0.273)S(0.111)S(0.111)QS(0.018)APPMS(0.006)PFS(0.006)S(0.006)AS(0.006)K	2	0.99498
sp|P35658|NU214_HUMAN Nuclear pore complex protein Nup214 OS=Homo sapiens OX=9606 GN=NUP214 PE=1 SV=2	P35658	602	55.094	FT(0.001)AAAT(0.011)S(0.156)T(0.156)PVS(0.225)S(0.225)S(0.073)QS(0.073)APPMS(0.009)PFS(0.024)S(0.024)AS(0.024)K	2	-0.54107
sp|P35658|NU214_HUMAN Nuclear pore complex protein Nup214 OS=Homo sapiens OX=9606 GN=NUP214 PE=1 SV=2	P35658	1202	124.25	IETAVT(0.036)S(0.628)T(0.001)PS(0.09)AS(0.09)GQFS(0.156)K	2	0.52992
sp|P35658|NU214_HUMAN Nuclear pore complex protein Nup214 OS=Homo sapiens OX=9606 GN=NUP214 PE=1 SV=2	P35658	1205	118.5	IETAVT(0.001)S(0.25)TPS(0.25)AS(0.25)GQFS(0.25)K	2	0.51471
sp|P35658|NU214_HUMAN Nuclear pore complex protein Nup214 OS=Homo sapiens OX=9606 GN=NUP214 PE=1 SV=2	P35658	1207	118.5	IETAVT(0.001)S(0.25)TPS(0.25)AS(0.25)GQFS(0.25)K	2	0.51471
sp|P35658|NU214_HUMAN Nuclear pore complex protein Nup214 OS=Homo sapiens OX=9606 GN=NUP214 PE=1 SV=2	P35658	1211	118.5	IET(0.001)AVTS(0.113)TPS(0.113)AS(0.113)GQFS(0.66)K	3	1.5377
sp|P35658|NU214_HUMAN Nuclear pore complex protein Nup214 OS=Homo sapiens OX=9606 GN=NUP214 PE=1 SV=2	P35658	1549	40.907	KEPVLAQPAVS(0.138)NS(0.138)GT(0.138)AAS(0.138)S(0.138)T(0.138)S(0.138)LVALS(0.031)AEAT(0.001)PATTGVPDAR	3	0.37257
sp|P35658|NU214_HUMAN Nuclear pore complex protein Nup214 OS=Homo sapiens OX=9606 GN=NUP214 PE=1 SV=2	P35658	1551	46.028	KEPVLAQPAVS(0.113)NS(0.308)GT(0.113)AAS(0.113)S(0.113)T(0.113)S(0.113)LVALS(0.008)AEAT(0.003)PATTGVPDAR	4	1.1454
sp|P35658|NU214_HUMAN Nuclear pore complex protein Nup214 OS=Homo sapiens OX=9606 GN=NUP214 PE=1 SV=2	P35658	1556	40.907	KEPVLAQPAVS(0.138)NS(0.138)GT(0.138)AAS(0.138)S(0.138)T(0.138)S(0.138)LVALS(0.031)AEAT(0.001)PATTGVPDAR	3	0.37257
sp|P35658|NU214_HUMAN Nuclear pore complex protein Nup214 OS=Homo sapiens OX=9606 GN=NUP214 PE=1 SV=2	P35658	1557	48.943	KEPVLAQPAVS(0.032)NS(0.074)GT(0.074)AAS(0.074)S(0.219)T(0.219)S(0.219)LVALS(0.088)AEAT(0.001)PATTGVPDAR	3	-0.68977
sp|P35658|NU214_HUMAN Nuclear pore complex protein Nup214 OS=Homo sapiens OX=9606 GN=NUP214 PE=1 SV=2	P35658	1559	48.943	KEPVLAQPAVS(0.032)NS(0.074)GT(0.074)AAS(0.074)S(0.219)T(0.219)S(0.219)LVALS(0.088)AEAT(0.001)PATTGVPDAR	3	-0.68977
sp|P35658|NU214_HUMAN Nuclear pore complex protein Nup214 OS=Homo sapiens OX=9606 GN=NUP214 PE=1 SV=2	P35658	461	44.056	LDAS(0.053)AAAAPAS(0.027)LPPS(0.336)S(0.129)PAAPIAT(0.28)FS(0.129)LLPAGGAPTVFS(0.011)FGS(0.011)S(0.011)S(0.011)LK	4	0.30897
sp|P35658|NU214_HUMAN Nuclear pore complex protein Nup214 OS=Homo sapiens OX=9606 GN=NUP214 PE=1 SV=2	P35658	471	48.867	LDAS(0.008)AAAAPAS(0.011)LPPS(0.109)S(0.361)PAAPIAT(0.095)FS(0.388)LLPAGGAPT(0.005)VFS(0.008)FGS(0.008)S(0.003)S(0.003)LK	4	-0.65194
sp|P35658|NU214_HUMAN Nuclear pore complex protein Nup214 OS=Homo sapiens OX=9606 GN=NUP214 PE=1 SV=2	P35658	1324	73.448	LGELLFPS(0.753)S(0.169)LAGETLGS(0.016)FS(0.062)GLR	3	1.6386
sp|P35658|NU214_HUMAN Nuclear pore complex protein Nup214 OS=Homo sapiens OX=9606 GN=NUP214 PE=1 SV=2	P35658	1325	73.448	LGELLFPS(0.158)S(0.635)LAGET(0.003)LGS(0.158)FS(0.047)GLR	3	0.30293
sp|P35658|NU214_HUMAN Nuclear pore complex protein Nup214 OS=Homo sapiens OX=9606 GN=NUP214 PE=1 SV=2	P35658	1333	73.448	LGELLFPS(0.235)S(0.235)LAGETLGS(0.265)FS(0.265)GLR	2	1.0521
sp|P35658|NU214_HUMAN Nuclear pore complex protein Nup214 OS=Homo sapiens OX=9606 GN=NUP214 PE=1 SV=2	P35658	1335	77.401	LGELLFPS(0.084)S(0.084)LAGETLGS(0.084)FS(0.747)GLR	3	-0.16156
sp|P35658|NU214_HUMAN Nuclear pore complex protein Nup214 OS=Homo sapiens OX=9606 GN=NUP214 PE=1 SV=2	P35658	1136	115.12	NNPAT(0.173)PS(0.618)T(0.113)AMGS(0.032)S(0.032)VPYS(0.032)TAK	2	-1.0151
sp|P35658|NU214_HUMAN Nuclear pore complex protein Nup214 OS=Homo sapiens OX=9606 GN=NUP214 PE=1 SV=2	P35658	1141	104.16	NNPAT(0.009)PS(0.27)T(0.006)AMGS(0.27)S(0.27)VPYS(0.175)TAK	2	-1.0308
sp|P35658|NU214_HUMAN Nuclear pore complex protein Nup214 OS=Homo sapiens OX=9606 GN=NUP214 PE=1 SV=2	P35658	1142	104.16	NNPAT(0.009)PS(0.27)T(0.006)AMGS(0.27)S(0.27)VPYS(0.175)TAK	2	-1.0308
sp|P35658|NU214_HUMAN Nuclear pore complex protein Nup214 OS=Homo sapiens OX=9606 GN=NUP214 PE=1 SV=2	P35658	1146	104.16	NNPAT(0.006)PS(0.059)T(0.123)AMGS(0.059)S(0.182)VPYS(0.572)TAK	2	-0.78307
sp|P35658|NU214_HUMAN Nuclear pore complex protein Nup214 OS=Homo sapiens OX=9606 GN=NUP214 PE=1 SV=2	P35658	1904	57.339	NPFS(0.525)S(0.168)AS(0.129)GGFGS(0.044)T(0.044)AT(0.044)S(0.015)NT(0.015)S(0.008)NLFGNS(0.008)GAK	2	0.34996
sp|P35658|NU214_HUMAN Nuclear pore complex protein Nup214 OS=Homo sapiens OX=9606 GN=NUP214 PE=1 SV=2	P35658	1905	57.339	NPFS(0.474)S(0.474)AS(0.036)GGFGS(0.013)T(0.002)ATSNTSNLFGNSGAK	3	-0.58907
sp|P35658|NU214_HUMAN Nuclear pore complex protein Nup214 OS=Homo sapiens OX=9606 GN=NUP214 PE=1 SV=2	P35658	1038	113.86	S(0.228)HLVHGS(0.177)S(0.177)PGVMGTS(0.177)VATS(0.177)AS(0.066)K	2	-0.40601
sp|P35658|NU214_HUMAN Nuclear pore complex protein Nup214 OS=Homo sapiens OX=9606 GN=NUP214 PE=1 SV=2	P35658	1045	67.43	S(0.27)HLVHGS(0.27)S(0.307)PGVMGT(0.025)S(0.044)VATS(0.044)AS(0.039)K	2	-1.3789
sp|P35658|NU214_HUMAN Nuclear pore complex protein Nup214 OS=Homo sapiens OX=9606 GN=NUP214 PE=1 SV=2	P35658	1056	100.67	S(0.128)HLVHGS(0.154)S(0.154)PGVMGT(0.003)S(0.185)VAT(0.001)S(0.223)AS(0.154)K	2	-1.392
sp|P35658|NU214_HUMAN Nuclear pore complex protein Nup214 OS=Homo sapiens OX=9606 GN=NUP214 PE=1 SV=2	P35658	1058	87.18	S(0.019)HLVHGS(0.132)S(0.132)PGVMGT(0.135)S(0.2)VAT(0.003)S(0.132)AS(0.246)K	2	-1.4062
sp|P35658|NU214_HUMAN Nuclear pore complex protein Nup214 OS=Homo sapiens OX=9606 GN=NUP214 PE=1 SV=2	P35658	430	121.95	S(0.946)PGS(0.038)TPTTPTS(0.008)S(0.008)QAPQK	2	0.098628
sp|P35658|NU214_HUMAN Nuclear pore complex protein Nup214 OS=Homo sapiens OX=9606 GN=NUP214 PE=1 SV=2	P35658	433	194.67	S(0.083)PGS(0.489)T(0.204)PT(0.012)T(0.002)PT(0.005)S(0.102)S(0.102)QAPQK	2	0.19422
sp|P35658|NU214_HUMAN Nuclear pore complex protein Nup214 OS=Homo sapiens OX=9606 GN=NUP214 PE=1 SV=2	P35658	440	194.67	S(0.055)PGS(0.315)TPTTPTS(0.315)S(0.315)QAPQK	2	0.25774
sp|P35658|NU214_HUMAN Nuclear pore complex protein Nup214 OS=Homo sapiens OX=9606 GN=NUP214 PE=1 SV=2	P35658	441	194.67	S(0.055)PGS(0.315)TPTTPTS(0.315)S(0.315)QAPQK	2	0.25774
sp|P35658|NU214_HUMAN Nuclear pore complex protein Nup214 OS=Homo sapiens OX=9606 GN=NUP214 PE=1 SV=2	P35658	491	91.401	S(0.219)S(0.219)AT(0.004)VT(0.001)GEPPS(0.173)YS(0.035)S(0.035)GS(0.138)DS(0.088)S(0.088)K	2	0.10735
sp|P35658|NU214_HUMAN Nuclear pore complex protein Nup214 OS=Homo sapiens OX=9606 GN=NUP214 PE=1 SV=2	P35658	492	91.401	S(0.219)S(0.219)AT(0.004)VT(0.001)GEPPS(0.173)YS(0.035)S(0.035)GS(0.138)DS(0.088)S(0.088)K	2	0.10735
sp|P35658|NU214_HUMAN Nuclear pore complex protein Nup214 OS=Homo sapiens OX=9606 GN=NUP214 PE=1 SV=2	P35658	506	80.585	S(0.021)S(0.021)AT(0.069)VT(0.003)GEPPS(0.021)YS(0.014)S(0.014)GS(0.36)DS(0.238)S(0.238)K	2	-0.20056
sp|P35658|NU214_HUMAN Nuclear pore complex protein Nup214 OS=Homo sapiens OX=9606 GN=NUP214 PE=1 SV=2	P35658	508	57.936	S(0.005)S(0.005)ATVT(0.075)GEPPS(0.004)YS(0.004)S(0.004)GS(0.328)DS(0.328)S(0.245)K	2	0.026996
sp|P35658|NU214_HUMAN Nuclear pore complex protein Nup214 OS=Homo sapiens OX=9606 GN=NUP214 PE=1 SV=2	P35658	509	68.129	S(0.026)S(0.026)AT(0.013)VT(0.003)GEPPS(0.026)YS(0.026)S(0.026)GS(0.123)DS(0.123)S(0.61)K	2	-1.3344
sp|P39059|COFA1_HUMAN Collagen alpha-1(XV) chain OS=Homo sapiens OX=9606 GN=COL15A1 PE=1 SV=2	P39059	18	41.45	RNNGQCWCLLMLLS(0.716)VS(0.216)T(0.075)PLPAVT(0.496)QT(0.496)R	3	1.9937
sp|P39880|CUX1_HUMAN Homeobox protein cut-like 1 OS=Homo sapiens OX=9606 GN=CUX1 PE=1 SV=3	P39880	734	73.802	QAPLS(0.5)QS(0.5)DITILTPK	2	-0.16484
sp|P39880|CUX1_HUMAN Homeobox protein cut-like 1 OS=Homo sapiens OX=9606 GN=CUX1 PE=1 SV=3	P39880	736	73.802	QAPLS(0.5)QS(0.5)DITILTPK	2	-0.16484
sp|P41162|ETV3_HUMAN ETS translocation variant 3 OS=Homo sapiens OX=9606 GN=ETV3 PE=1 SV=2	P41162	6	52.937	KAGCS(1)IVEK	2	-0.16896
sp|P41235|HNF4A_HUMAN Hepatocyte nuclear factor 4-alpha OS=Homo sapiens OX=9606 GN=HNF4A PE=1 SV=3	P41235	170	74.649	QIT(0.259)S(0.172)PVS(0.569)GINGDIR	2	1.1082
sp|P43243|MATR3_HUMAN Matrin-3 OS=Homo sapiens OX=9606 GN=MATR3 PE=1 SV=2	P43243	22	89.381	DLS(0.842)AAGIGLLAAAT(0.026)QS(0.044)LS(0.044)MPAS(0.044)LGR	3	0.19079
sp|P43243|MATR3_HUMAN Matrin-3 OS=Homo sapiens OX=9606 GN=MATR3 PE=1 SV=2	P43243	35	83.747	DLS(0.019)AAGIGLLAAAT(0.306)QS(0.306)LS(0.306)MPAS(0.062)LGR	2	0.37432
sp|P43243|MATR3_HUMAN Matrin-3 OS=Homo sapiens OX=9606 GN=MATR3 PE=1 SV=2	P43243	37	83.747	DLS(0.013)AAGIGLLAAAT(0.035)QS(0.035)LS(0.839)MPAS(0.078)LGR	2	1.5797
sp|P43243|MATR3_HUMAN Matrin-3 OS=Homo sapiens OX=9606 GN=MATR3 PE=1 SV=2	P43243	41	112.99	DLS(0.02)AAGIGLLAAATQS(0.09)LS(0.12)MPAS(0.77)LGR	3	0.11257
sp|P43354|NR4A2_HUMAN Nuclear receptor subfamily 4 group A member 2 OS=Homo sapiens OX=9606 GN=NR4A2 PE=1 SV=1	P43354	359	44.391	S(0.157)PQEPS(0.252)PPS(0.944)PPVS(0.643)LIS(0.004)ALVR	3	-2.6248
sp|P43354|NR4A2_HUMAN Nuclear receptor subfamily 4 group A member 2 OS=Homo sapiens OX=9606 GN=NR4A2 PE=1 SV=1	P43354	363	44.391	S(0.157)PQEPS(0.252)PPS(0.944)PPVS(0.643)LIS(0.004)ALVR	3	-2.6248
sp|P43694|GATA4_HUMAN Transcription factor GATA-4 OS=Homo sapiens OX=9606 GN=GATA4 PE=1 SV=2	P43694	347	41.933	T(0.002)PAAPS(0.035)GS(0.035)ES(0.008)LPPAS(0.082)GAS(0.271)S(0.082)NS(0.082)S(0.082)NAT(0.082)T(0.082)S(0.049)S(0.049)S(0.057)EEMRPIK	3	-0.94734
sp|P46013|KI67_HUMAN Proliferation marker protein Ki-67 OS=Homo sapiens OX=9606 GN=MKI67 PE=1 SV=2	P46013	859	157.97	T(0.001)S(0.773)DTETEPS(0.226)K	2	1.1239
sp|P46013|KI67_HUMAN Proliferation marker protein Ki-67 OS=Homo sapiens OX=9606 GN=MKI67 PE=1 SV=2	P46013	866	161.67	T(0.102)S(0.163)DTETEPS(0.736)K	2	0.75008
sp|P46459|NSF_HUMAN Vesicle-fusing ATPase OS=Homo sapiens OX=9606 GN=NSF PE=1 SV=3	P46459	298	54.805	VVNGPEILNKYVGES(1)EANIR	3	1.2218
sp|P48382|RFX5_HUMAN DNA-binding protein RFX5 OS=Homo sapiens OX=9606 GN=RFX5 PE=1 SV=1	P48382	439	131.72	T(0.023)AEVPVS(0.789)EAS(0.189)GQAPPAK	2	0.96667
sp|P48382|RFX5_HUMAN DNA-binding protein RFX5 OS=Homo sapiens OX=9606 GN=RFX5 PE=1 SV=1	P48382	442	129.29	T(0.017)AEVPVS(0.213)EAS(0.769)GQAPPAK	2	-0.2116
sp|P48426|PI42A_HUMAN Phosphatidylinositol 5-phosphate 4-kinase type-2 alpha OS=Homo sapiens OX=9606 GN=PIP4K2A PE=1 SV=2	P48426	9	48.115	AT(0.003)PGNLGS(0.743)S(0.262)VLAS(0.992)K	2	-2.3799
sp|P48426|PI42A_HUMAN Phosphatidylinositol 5-phosphate 4-kinase type-2 alpha OS=Homo sapiens OX=9606 GN=PIP4K2A PE=1 SV=2	P48426	14	48.115	AT(0.003)PGNLGS(0.743)S(0.262)VLAS(0.992)K	2	-2.3799
sp|P48735|IDHP_HUMAN Isocitrate dehydrogenase [NADP], mitochondrial OS=Homo sapiens OX=9606 GN=IDH2 PE=1 SV=2	P48735	100	55.815	DQTDDQVT(0.003)IDS(0.499)ALAT(0.499)QK	3	-1.3676
sp|P49336|CDK8_HUMAN Cyclin-dependent kinase 8 OS=Homo sapiens OX=9606 GN=CDK8 PE=1 SV=1	P49336	413	60.635	VVPPT(0.049)T(0.043)T(0.057)S(0.735)GGLIMT(0.002)S(0.113)DYQR	3	0.13689
sp|P49336|CDK8_HUMAN Cyclin-dependent kinase 8 OS=Homo sapiens OX=9606 GN=CDK8 PE=1 SV=1	P49336	420	59.163	VVPPT(0.123)T(0.123)T(0.037)S(0.037)GGLIMT(0.01)S(0.67)DYQR	3	-0.46876
sp|P49750|YLPM1_HUMAN YLP motif-containing protein 1 OS=Homo sapiens OX=9606 GN=YLPM1 PE=1 SV=4	P49750	676	46.082	PALLPT(0.061)PVS(0.439)FGS(0.439)APPT(0.03)T(0.006)YHPPLQS(0.008)AGPS(0.008)EQVNS(0.008)K	4	-0.34742
sp|P49750|YLPM1_HUMAN YLP motif-containing protein 1 OS=Homo sapiens OX=9606 GN=YLPM1 PE=1 SV=4	P49750	679	46.082	PALLPT(0.061)PVS(0.439)FGS(0.439)APPT(0.03)T(0.006)YHPPLQS(0.008)AGPS(0.008)EQVNS(0.008)K	4	-0.34742
sp|P49750|YLPM1_HUMAN YLP motif-containing protein 1 OS=Homo sapiens OX=9606 GN=YLPM1 PE=1 SV=4	P49750	712	42.894	S(0.506)ALPYS(0.662)S(0.616)FS(0.179)S(0.02)DQGLGES(0.008)S(0.008)AAPS(0.001)QPIT(0.001)AVKDMPVR	5	-3.0418
sp|P49750|YLPM1_HUMAN YLP motif-containing protein 1 OS=Homo sapiens OX=9606 GN=YLPM1 PE=1 SV=4	P49750	713	42.894	S(0.506)ALPYS(0.662)S(0.616)FS(0.179)S(0.02)DQGLGES(0.008)S(0.008)AAPS(0.001)QPIT(0.001)AVKDMPVR	5	-3.0418
sp|P49790|NU153_HUMAN Nuclear pore complex protein Nup153 OS=Homo sapiens OX=9606 GN=NUP153 PE=1 SV=2	P49790	908	228.93	FGVS(0.976)S(0.014)S(0.003)S(0.002)S(0.002)GPS(0.002)QTLTS(0.002)TGNFK	2	-0.20454
sp|P49790|NU153_HUMAN Nuclear pore complex protein Nup153 OS=Homo sapiens OX=9606 GN=NUP153 PE=1 SV=2	P49790	909	146.77	FGVS(0.079)S(0.855)S(0.025)S(0.014)S(0.014)GPS(0.005)QTLTS(0.009)TGNFK	2	0.41554
sp|P49790|NU153_HUMAN Nuclear pore complex protein Nup153 OS=Homo sapiens OX=9606 GN=NUP153 PE=1 SV=2	P49790	910	86.258	FGVS(0.083)S(0.175)S(0.365)S(0.025)S(0.101)GPS(0.101)QTLTS(0.149)TGNFK	3	0.24024
sp|P49790|NU153_HUMAN Nuclear pore complex protein Nup153 OS=Homo sapiens OX=9606 GN=NUP153 PE=1 SV=2	P49790	920	185.33	FGVS(0.025)S(0.128)S(0.128)S(0.128)S(0.128)GPS(0.168)QTLTS(0.293)TGNFK	2	0.19897
sp|P49790|NU153_HUMAN Nuclear pore complex protein Nup153 OS=Homo sapiens OX=9606 GN=NUP153 PE=1 SV=2	P49790	891	150.91	GFDT(0.255)S(0.34)S(0.102)S(0.102)S(0.05)S(0.05)NS(0.05)AAS(0.017)S(0.017)S(0.017)FK	2	0.053273
sp|P49790|NU153_HUMAN Nuclear pore complex protein Nup153 OS=Homo sapiens OX=9606 GN=NUP153 PE=1 SV=2	P49790	892	150.91	GFDT(0.179)S(0.225)S(0.458)S(0.049)S(0.035)S(0.035)NS(0.004)AAS(0.005)S(0.005)S(0.005)FK	2	-0.14873
sp|P49790|NU153_HUMAN Nuclear pore complex protein Nup153 OS=Homo sapiens OX=9606 GN=NUP153 PE=1 SV=2	P49790	893	150.91	GFDT(0.001)S(0.017)S(0.303)S(0.303)S(0.071)S(0.071)NS(0.071)AAS(0.071)S(0.071)S(0.021)FK	2	-2.4097
sp|P49790|NU153_HUMAN Nuclear pore complex protein Nup153 OS=Homo sapiens OX=9606 GN=NUP153 PE=1 SV=2	P49790	894	150.91	GFDT(0.004)S(0.164)S(0.164)S(0.164)S(0.164)S(0.164)NS(0.164)AAS(0.004)S(0.004)S(0.004)FK	2	-0.4391
sp|P49790|NU153_HUMAN Nuclear pore complex protein Nup153 OS=Homo sapiens OX=9606 GN=NUP153 PE=1 SV=2	P49790	895	150.91	GFDT(0.004)S(0.164)S(0.164)S(0.164)S(0.164)S(0.164)NS(0.164)AAS(0.004)S(0.004)S(0.004)FK	2	-0.4391
sp|P49790|NU153_HUMAN Nuclear pore complex protein Nup153 OS=Homo sapiens OX=9606 GN=NUP153 PE=1 SV=2	P49790	897	150.91	GFDT(0.004)S(0.164)S(0.164)S(0.164)S(0.164)S(0.164)NS(0.164)AAS(0.004)S(0.004)S(0.004)FK	2	-0.4391
sp|P49790|NU153_HUMAN Nuclear pore complex protein Nup153 OS=Homo sapiens OX=9606 GN=NUP153 PE=1 SV=2	P49790	900	138.66	GFDT(0.043)S(0.017)S(0.007)S(0.003)S(0.003)S(0.003)NS(0.028)AAS(0.461)S(0.354)S(0.08)FK	3	-0.28885
sp|P49790|NU153_HUMAN Nuclear pore complex protein Nup153 OS=Homo sapiens OX=9606 GN=NUP153 PE=1 SV=2	P49790	901	138.66	GFDT(0.002)S(0.057)S(0.057)S(0.057)S(0.057)S(0.057)NS(0.057)AAS(0.3)S(0.3)S(0.057)FK	2	-0.38362
sp|P49790|NU153_HUMAN Nuclear pore complex protein Nup153 OS=Homo sapiens OX=9606 GN=NUP153 PE=1 SV=2	P49790	902	132.59	GFDT(0.005)S(0.103)S(0.103)S(0.103)S(0.103)S(0.103)NS(0.08)AAS(0.133)S(0.133)S(0.133)FK	2	-0.93639
sp|P49790|NU153_HUMAN Nuclear pore complex protein Nup153 OS=Homo sapiens OX=9606 GN=NUP153 PE=1 SV=2	P49790	624	79.886	IDS(0.997)VAAQPTATS(0.003)PVVYTR	2	-0.069768
sp|P49790|NU153_HUMAN Nuclear pore complex protein Nup153 OS=Homo sapiens OX=9606 GN=NUP153 PE=1 SV=2	P49790	633	74.428	IDS(0.015)VAAQPT(0.001)AT(0.001)S(0.984)PVVYTR	3	0.78725
sp|P49790|NU153_HUMAN Nuclear pore complex protein Nup153 OS=Homo sapiens OX=9606 GN=NUP153 PE=1 SV=2	P49790	937	95.428	IGVS(0.808)S(0.149)DS(0.013)GS(0.019)INPMS(0.01)EGFK	2	0.25479
sp|P49790|NU153_HUMAN Nuclear pore complex protein Nup153 OS=Homo sapiens OX=9606 GN=NUP153 PE=1 SV=2	P49790	938	80.312	IGVS(0.085)S(0.822)DS(0.043)GS(0.025)INPMS(0.025)EGFK	2	-0.22305
sp|P49790|NU153_HUMAN Nuclear pore complex protein Nup153 OS=Homo sapiens OX=9606 GN=NUP153 PE=1 SV=2	P49790	940	64.327	IGVS(0.113)S(0.171)DS(0.402)GS(0.303)INPMS(0.011)EGFK	3	0.18447
sp|P49790|NU153_HUMAN Nuclear pore complex protein Nup153 OS=Homo sapiens OX=9606 GN=NUP153 PE=1 SV=2	P49790	481	54.136	IS(0.025)LPIT(0.262)S(0.262)S(0.262)S(0.093)LPT(0.031)FNFS(0.013)S(0.013)PEIT(0.013)T(0.013)S(0.006)S(0.002)PS(0.002)PINS(0.001)S(0.001)QALTNK	3	-0.074931
sp|P49790|NU153_HUMAN Nuclear pore complex protein Nup153 OS=Homo sapiens OX=9606 GN=NUP153 PE=1 SV=2	P49790	482	54.136	IS(0.025)LPIT(0.262)S(0.262)S(0.262)S(0.093)LPT(0.031)FNFS(0.013)S(0.013)PEIT(0.013)T(0.013)S(0.006)S(0.002)PS(0.002)PINS(0.001)S(0.001)QALTNK	3	-0.074931
sp|P49790|NU153_HUMAN Nuclear pore complex protein Nup153 OS=Homo sapiens OX=9606 GN=NUP153 PE=1 SV=2	P49790	483	54.136	IS(0.019)LPIT(0.022)S(0.194)S(0.194)S(0.194)LPT(0.093)FNFS(0.1)S(0.1)PEIT(0.028)T(0.028)S(0.011)S(0.011)PS(0.003)PINS(0.001)SQALTNK	4	-1.3708
sp|P49790|NU153_HUMAN Nuclear pore complex protein Nup153 OS=Homo sapiens OX=9606 GN=NUP153 PE=1 SV=2	P49790	490	46.25	IS(0.008)LPIT(0.028)S(0.028)S(0.074)S(0.189)LPT(0.189)FNFS(0.189)S(0.089)PEIT(0.089)T(0.044)S(0.044)S(0.022)PS(0.002)PINS(0.001)S(0.001)QALTNK	4	-0.58908
sp|P49790|NU153_HUMAN Nuclear pore complex protein Nup153 OS=Homo sapiens OX=9606 GN=NUP153 PE=1 SV=2	P49790	497	47.395	IS(0.001)LPIT(0.005)S(0.005)S(0.005)S(0.002)LPT(0.005)FNFS(0.005)S(0.005)PEIT(0.177)T(0.208)S(0.208)S(0.208)PS(0.074)PINS(0.048)S(0.048)QALTNK	4	0.31802
sp|P49790|NU153_HUMAN Nuclear pore complex protein Nup153 OS=Homo sapiens OX=9606 GN=NUP153 PE=1 SV=2	P49790	498	47.395	IS(0.001)LPIT(0.005)S(0.005)S(0.005)S(0.002)LPT(0.005)FNFS(0.005)S(0.005)PEIT(0.177)T(0.208)S(0.208)S(0.208)PS(0.074)PINS(0.048)S(0.048)QALTNK	4	0.31802
sp|P49790|NU153_HUMAN Nuclear pore complex protein Nup153 OS=Homo sapiens OX=9606 GN=NUP153 PE=1 SV=2	P49790	504	45.61	IS(0.012)LPIT(0.023)S(0.023)S(0.024)S(0.024)LPT(0.024)FNFS(0.036)S(0.036)PEIT(0.026)T(0.043)S(0.114)S(0.051)PS(0.046)PINS(0.386)S(0.131)QALTNK	3	-0.04391
sp|P49790|NU153_HUMAN Nuclear pore complex protein Nup153 OS=Homo sapiens OX=9606 GN=NUP153 PE=1 SV=2	P49790	1113	131.79	QQEPVTS(0.5)TS(0.5)LVFGK	2	0.11508
sp|P49790|NU153_HUMAN Nuclear pore complex protein Nup153 OS=Homo sapiens OX=9606 GN=NUP153 PE=1 SV=2	P49790	1115	131.79	QQEPVTS(0.5)TS(0.5)LVFGK	2	0.11508
sp|P49790|NU153_HUMAN Nuclear pore complex protein Nup153 OS=Homo sapiens OX=9606 GN=NUP153 PE=1 SV=2	P49790	1017	74.662	S(0.452)S(0.452)S(0.037)AGFS(0.037)FGT(0.014)GVINS(0.002)T(0.002)PAPANT(0.001)IVTS(0.004)ENK	3	-0.54074
sp|P49790|NU153_HUMAN Nuclear pore complex protein Nup153 OS=Homo sapiens OX=9606 GN=NUP153 PE=1 SV=2	P49790	1018	74.662	S(0.452)S(0.452)S(0.037)AGFS(0.037)FGT(0.014)GVINS(0.002)T(0.002)PAPANT(0.001)IVTS(0.004)ENK	3	-0.54074
sp|P49790|NU153_HUMAN Nuclear pore complex protein Nup153 OS=Homo sapiens OX=9606 GN=NUP153 PE=1 SV=2	P49790	1019	74.662	S(0.196)S(0.196)S(0.196)AGFS(0.196)FGT(0.196)GVINS(0.016)T(0.004)PAPANTIVTS(0.003)ENK	2	-1.1037
sp|P49790|NU153_HUMAN Nuclear pore complex protein Nup153 OS=Homo sapiens OX=9606 GN=NUP153 PE=1 SV=2	P49790	1023	74.662	S(0.21)S(0.21)S(0.19)AGFS(0.21)FGT(0.071)GVINS(0.089)T(0.014)PAPANTIVTS(0.003)ENK	3	-0.4386
sp|P49790|NU153_HUMAN Nuclear pore complex protein Nup153 OS=Homo sapiens OX=9606 GN=NUP153 PE=1 SV=2	P49790	1031	82.007	S(0.152)S(0.152)S(0.035)AGFS(0.031)FGT(0.035)GVINS(0.515)T(0.072)PAPANTIVTS(0.007)ENK	2	-0.72267
sp|P49790|NU153_HUMAN Nuclear pore complex protein Nup153 OS=Homo sapiens OX=9606 GN=NUP153 PE=1 SV=2	P49790	1042	67.827	S(0.113)S(0.113)S(0.094)AGFS(0.094)FGT(0.094)GVINS(0.045)T(0.142)PAPANTIVTS(0.308)ENK	2	-1.1132
sp|P49790|NU153_HUMAN Nuclear pore complex protein Nup153 OS=Homo sapiens OX=9606 GN=NUP153 PE=1 SV=2	P49790	534	78.401	S(1)T(1)EANVLPPSSIGFTFSVPVAK	2	0.41772
sp|P49790|NU153_HUMAN Nuclear pore complex protein Nup153 OS=Homo sapiens OX=9606 GN=NUP153 PE=1 SV=2	P49790	543	70.771	S(0.114)T(0.003)EANVLPPS(0.419)S(0.419)IGFT(0.001)FS(0.044)VPVAK	3	-0.47562
sp|P49790|NU153_HUMAN Nuclear pore complex protein Nup153 OS=Homo sapiens OX=9606 GN=NUP153 PE=1 SV=2	P49790	544	70.771	S(0.114)T(0.003)EANVLPPS(0.419)S(0.419)IGFT(0.001)FS(0.044)VPVAK	3	-0.47562
sp|P49790|NU153_HUMAN Nuclear pore complex protein Nup153 OS=Homo sapiens OX=9606 GN=NUP153 PE=1 SV=2	P49790	550	72.883	S(0.088)T(0.003)EANVLPPS(0.088)S(0.088)IGFT(0.004)FS(0.728)VPVAK	2	0.98197
sp|P49792|RBP2_HUMAN E3 SUMO-protein ligase RanBP2 OS=Homo sapiens OX=9606 GN=RANBP2 PE=1 SV=2;sp|A6NKT7|RGPD3_HUMAN RanBP2-like and GRIP domain-containing protein 3 OS=Homo sapiens OX=9606 GN=RGPD3 PE=3 SV=2;sp|O14715|RGPD8_HUMAN RANBP2-like and GRIP doma	P49792;A6NKT7;O14715;Q7Z3J3;Q99666	1890;915;914;915;914	108.68	EGFS(0.855)IPVS(0.145)ADGFK	2	-0.3263
sp|P49792|RBP2_HUMAN E3 SUMO-protein ligase RanBP2 OS=Homo sapiens OX=9606 GN=RANBP2 PE=1 SV=2;sp|A6NKT7|RGPD3_HUMAN RanBP2-like and GRIP domain-containing protein 3 OS=Homo sapiens OX=9606 GN=RGPD3 PE=3 SV=2;sp|O14715|RGPD8_HUMAN RANBP2-like and GRIP doma	P49792;A6NKT7;O14715;Q7Z3J3;Q99666	1894;919;918;919;918	108.68	EGFS(0.5)IPVS(0.5)ADGFK	2	0.51925
sp|P49792|RBP2_HUMAN E3 SUMO-protein ligase RanBP2 OS=Homo sapiens OX=9606 GN=RANBP2 PE=1 SV=2	P49792	1643	79.92	QNQTT(0.001)S(0.185)AVS(0.203)T(0.002)PAS(0.203)S(0.203)ETS(0.203)K	2	-0.24287
sp|P49792|RBP2_HUMAN E3 SUMO-protein ligase RanBP2 OS=Homo sapiens OX=9606 GN=RANBP2 PE=1 SV=2	P49792	1647	79.92	QNQTT(0.001)S(0.185)AVS(0.203)T(0.002)PAS(0.203)S(0.203)ETS(0.203)K	2	-0.24287
sp|P49792|RBP2_HUMAN E3 SUMO-protein ligase RanBP2 OS=Homo sapiens OX=9606 GN=RANBP2 PE=1 SV=2	P49792	1648	79.92	QNQTT(0.001)S(0.185)AVS(0.203)T(0.002)PAS(0.203)S(0.203)ETS(0.203)K	2	-0.24287
sp|P49792|RBP2_HUMAN E3 SUMO-protein ligase RanBP2 OS=Homo sapiens OX=9606 GN=RANBP2 PE=1 SV=2	P49792	1651	79.92	QNQTT(0.001)S(0.185)AVS(0.203)T(0.002)PAS(0.203)S(0.203)ETS(0.203)K	2	-0.24287
sp|P49848|TAF6_HUMAN Transcription initiation factor TFIID subunit 6 OS=Homo sapiens OX=9606 GN=TAF6 PE=1 SV=1	P49848	586	47.688	LVS(0.387)T(0.024)AT(0.118)T(0.118)APPS(0.118)TAPS(0.118)GPGS(0.118)VQK	2	-0.55172
sp|P49848|TAF6_HUMAN Transcription initiation factor TFIID subunit 6 OS=Homo sapiens OX=9606 GN=TAF6 PE=1 SV=1	P49848	594	56.131	LVS(0.266)T(0.266)AT(0.072)T(0.028)APPS(0.311)T(0.033)APS(0.018)GPGS(0.006)VQK	3	0.34825
sp|P49848|TAF6_HUMAN Transcription initiation factor TFIID subunit 6 OS=Homo sapiens OX=9606 GN=TAF6 PE=1 SV=1	P49848	602	56.428	LVS(0.154)T(0.154)AT(0.154)T(0.154)APPS(0.113)TAPS(0.078)GPGS(0.194)VQK	2	-0.13945
sp|P51610|HCFC1_HUMAN Host cell factor 1 OS=Homo sapiens OX=9606 GN=HCFC1 PE=1 SV=2	P51610	518	128.68	APVT(0.002)VTS(0.997)LPAGVR	2	0.35361
sp|P51610|HCFC1_HUMAN Host cell factor 1 OS=Homo sapiens OX=9606 GN=HCFC1 PE=1 SV=2	P51610	3	45.452	AS(0.5)AVS(0.5)PANLPAVLLQPR	2	1.1737
sp|P51610|HCFC1_HUMAN Host cell factor 1 OS=Homo sapiens OX=9606 GN=HCFC1 PE=1 SV=2	P51610	6	45.452	AS(0.5)AVS(0.5)PANLPAVLLQPR	2	1.1737
sp|P51610|HCFC1_HUMAN Host cell factor 1 OS=Homo sapiens OX=9606 GN=HCFC1 PE=1 SV=2	P51610	1490	61.429	AVT(0.07)T(0.07)VT(0.121)QS(0.357)T(0.357)PVPGPS(0.021)VPPPEELQVS(0.003)PGPR	3	0.09096
sp|P51610|HCFC1_HUMAN Host cell factor 1 OS=Homo sapiens OX=9606 GN=HCFC1 PE=1 SV=2	P51610	1497	41.939	AVT(0.039)T(0.039)VT(0.039)QS(0.145)T(0.145)PVPGPS(0.585)VPPPEELQVS(0.007)PGPR	4	0.15383
sp|P51610|HCFC1_HUMAN Host cell factor 1 OS=Homo sapiens OX=9606 GN=HCFC1 PE=1 SV=2	P51610	1507	46.307	AVT(0.153)T(0.139)VT(0.139)QS(0.139)T(0.139)PVPGPS(0.053)VPPPEELQVS(0.239)PGPR	2	-1.8343
sp|P51610|HCFC1_HUMAN Host cell factor 1 OS=Homo sapiens OX=9606 GN=HCFC1 PE=1 SV=2	P51610	562	104.45	IPPS(0.497)S(0.497)APT(0.003)VLS(0.003)VPAGTTIVK	3	-0.32542
sp|P51610|HCFC1_HUMAN Host cell factor 1 OS=Homo sapiens OX=9606 GN=HCFC1 PE=1 SV=2	P51610	563	104.45	IPPS(0.497)S(0.497)APT(0.003)VLS(0.003)VPAGTTIVK	3	-0.32542
sp|P51610|HCFC1_HUMAN Host cell factor 1 OS=Homo sapiens OX=9606 GN=HCFC1 PE=1 SV=2	P51610	569	100.02	IPPS(0.105)S(0.105)APT(0.006)VLS(0.784)VPAGTTIVK	2	0.13688
sp|P51610|HCFC1_HUMAN Host cell factor 1 OS=Homo sapiens OX=9606 GN=HCFC1 PE=1 SV=2	P51610	1150	95.401	IS(0.971)VATGALEAAQGS(0.029)K	2	-0.14655
sp|P51610|HCFC1_HUMAN Host cell factor 1 OS=Homo sapiens OX=9606 GN=HCFC1 PE=1 SV=2	P51610	1162	82.578	IS(0.131)VAT(0.001)GALEAAQGS(0.868)K	2	-0.29311
sp|P51610|HCFC1_HUMAN Host cell factor 1 OS=Homo sapiens OX=9606 GN=HCFC1 PE=1 SV=2	P51610	863	51.225	LVT(0.049)PVT(0.015)VS(0.935)AVKPAVT(0.001)TLVVK	2	0.45105
sp|P51610|HCFC1_HUMAN Host cell factor 1 OS=Homo sapiens OX=9606 GN=HCFC1 PE=1 SV=2	P51610	755	62.582	PT(0.001)ILGIS(0.114)S(0.389)VS(0.389)PS(0.1)T(0.003)T(0.002)KPGTTTIIK	3	1.1249
sp|P51610|HCFC1_HUMAN Host cell factor 1 OS=Homo sapiens OX=9606 GN=HCFC1 PE=1 SV=2	P51610	757	62.582	PT(0.001)ILGIS(0.114)S(0.389)VS(0.389)PS(0.1)T(0.003)T(0.002)KPGTTTIIK	3	1.1249
sp|P51610|HCFC1_HUMAN Host cell factor 1 OS=Homo sapiens OX=9606 GN=HCFC1 PE=1 SV=2	P51610	695	108.72	VMS(0.042)VVQT(0.046)KPVQT(0.367)S(0.513)AVT(0.018)GQAS(0.014)TGPVTQIIQTK	3	-0.12429
sp|P51610|HCFC1_HUMAN Host cell factor 1 OS=Homo sapiens OX=9606 GN=HCFC1 PE=1 SV=2	P51610	702	110.33	VMS(0.003)VVQT(0.004)KPVQT(0.001)S(0.002)AVT(0.006)GQAS(0.91)T(0.07)GPVT(0.003)QIIQTK	4	-0.23681
sp|P51610|HCFC1_HUMAN Host cell factor 1 OS=Homo sapiens OX=9606 GN=HCFC1 PE=1 SV=2	P51610	638	72.801	S(0.961)GT(0.001)VT(0.035)VAQQAQVVTT(0.001)VVGGVT(0.002)K	3	-0.93411
sp|P51610|HCFC1_HUMAN Host cell factor 1 OS=Homo sapiens OX=9606 GN=HCFC1 PE=1 SV=2	P51610	794	136.96	S(1)PITIITTK	2	-0.50243
sp|P51610|HCFC1_HUMAN Host cell factor 1 OS=Homo sapiens OX=9606 GN=HCFC1 PE=1 SV=2	P51610	806	108.5	S(0.008)PITIITTKVMTS(0.991)GT(0.001)GAPAK	3	1.4738
sp|P51610|HCFC1_HUMAN Host cell factor 1 OS=Homo sapiens OX=9606 GN=HCFC1 PE=1 SV=2	P51610	620	111.53	TAAAQVGT(0.693)S(0.691)VS(0.278)S(0.318)AT(0.011)NTS(0.007)TRPIIT(0.001)VHK	4	-0.29723
sp|P51610|HCFC1_HUMAN Host cell factor 1 OS=Homo sapiens OX=9606 GN=HCFC1 PE=1 SV=2	P51610	622	67.877	T(0.001)AAAQVGT(0.539)S(0.451)VS(0.451)S(0.452)AT(0.054)NT(0.012)S(0.025)T(0.008)RPIIT(0.007)VHK	4	0.15789
sp|P51610|HCFC1_HUMAN Host cell factor 1 OS=Homo sapiens OX=9606 GN=HCFC1 PE=1 SV=2	P51610	623	67.136	TAAAQVGT(0.551)S(0.509)VS(0.318)S(0.545)AT(0.028)NT(0.02)S(0.021)T(0.006)RPIIT(0.001)VHK	4	-0.61585
sp|P51610|HCFC1_HUMAN Host cell factor 1 OS=Homo sapiens OX=9606 GN=HCFC1 PE=1 SV=2	P51610	628	43.293	T(0.001)AAAQVGT(0.117)S(0.178)VS(0.324)S(0.273)AT(0.303)NT(0.32)S(0.325)T(0.115)RPIIT(0.043)VHK	4	0.41362
sp|P51610|HCFC1_HUMAN Host cell factor 1 OS=Homo sapiens OX=9606 GN=HCFC1 PE=1 SV=2	P51610	775	134.32	T(0.138)IPMS(0.811)AIIT(0.002)QAGATGVTS(0.01)S(0.039)PGIK	3	0.020386
sp|P51610|HCFC1_HUMAN Host cell factor 1 OS=Homo sapiens OX=9606 GN=HCFC1 PE=1 SV=2	P51610	788	134.32	T(0.02)IPMS(0.004)AIITQAGATGVTS(0.488)S(0.488)PGIK	3	-0.77954
sp|P51610|HCFC1_HUMAN Host cell factor 1 OS=Homo sapiens OX=9606 GN=HCFC1 PE=1 SV=2	P51610	789	134.32	T(0.02)IPMS(0.004)AIITQAGATGVTS(0.488)S(0.488)PGIK	3	-0.77954
sp|P51610|HCFC1_HUMAN Host cell factor 1 OS=Homo sapiens OX=9606 GN=HCFC1 PE=1 SV=2	P51610	685	112.62	VMS(0.662)VVQT(0.117)KPVQT(0.173)S(0.033)AVT(0.006)GQAS(0.005)T(0.003)GPVT(0.002)QIIQTK	3	0.57876
sp|P51610|HCFC1_HUMAN Host cell factor 1 OS=Homo sapiens OX=9606 GN=HCFC1 PE=1 SV=2	P51610	411	67.605	YDIPAT(0.008)AAT(0.009)AT(0.414)S(0.48)PT(0.064)PNPVPS(0.025)VPANPPK	2	-2.3421
sp|P52594|AGFG1_HUMAN Arf-GAP domain and FG repeat-containing protein 1 OS=Homo sapiens OX=9606 GN=AGFG1 PE=1 SV=2	P52594	359	76.574	APVGS(0.31)VVS(0.31)VPS(0.076)QS(0.076)S(0.076)AS(0.076)S(0.076)DK	2	-0.63927
sp|P52594|AGFG1_HUMAN Arf-GAP domain and FG repeat-containing protein 1 OS=Homo sapiens OX=9606 GN=AGFG1 PE=1 SV=2	P52594	362	76.574	APVGS(0.31)VVS(0.31)VPS(0.076)QS(0.076)S(0.076)AS(0.076)S(0.076)DK	2	-0.63927
sp|P52594|AGFG1_HUMAN Arf-GAP domain and FG repeat-containing protein 1 OS=Homo sapiens OX=9606 GN=AGFG1 PE=1 SV=2	P52594	368	68.243	APVGS(0.067)VVS(0.067)VPS(0.067)QS(0.067)S(0.244)AS(0.244)S(0.244)DK	2	0.13621
sp|P52594|AGFG1_HUMAN Arf-GAP domain and FG repeat-containing protein 1 OS=Homo sapiens OX=9606 GN=AGFG1 PE=1 SV=2	P52594	370	68.243	APVGS(0.067)VVS(0.067)VPS(0.067)QS(0.067)S(0.244)AS(0.244)S(0.244)DK	2	0.13621
sp|P52594|AGFG1_HUMAN Arf-GAP domain and FG repeat-containing protein 1 OS=Homo sapiens OX=9606 GN=AGFG1 PE=1 SV=2	P52594	371	68.243	APVGS(0.067)VVS(0.067)VPS(0.067)QS(0.067)S(0.244)AS(0.244)S(0.244)DK	2	0.13621
sp|P52948|NUP98_HUMAN Nuclear pore complex protein Nup98-Nup96 OS=Homo sapiens OX=9606 GN=NUP98 PE=1 SV=4	P52948	230	43.655	KGPQNQVGAGT(0.049)T(0.049)T(0.044)GLFGS(0.124)S(0.124)PAT(0.124)S(0.124)S(0.124)AT(0.124)GLFS(0.039)S(0.015)S(0.015)T(0.013)T(0.014)NS(0.015)GFAYGQNK	4	-0.13968
sp|P52948|NUP98_HUMAN Nuclear pore complex protein Nup98-Nup96 OS=Homo sapiens OX=9606 GN=NUP98 PE=1 SV=4	P52948	231	58.325	KGPQNQVGAGTT(0.001)T(0.001)GLFGS(0.055)S(0.156)PAT(0.156)S(0.156)S(0.156)AT(0.156)GLFS(0.065)S(0.023)S(0.023)T(0.023)T(0.023)NS(0.004)GFAYGQNK	3	-0.61216
sp|P52948|NUP98_HUMAN Nuclear pore complex protein Nup98-Nup96 OS=Homo sapiens OX=9606 GN=NUP98 PE=1 SV=4	P52948	235	61.759	KGPQNQVGAGT(0.001)T(0.001)T(0.001)GLFGS(0.02)S(0.02)PAT(0.34)S(0.34)S(0.114)AT(0.04)GLFS(0.02)S(0.02)S(0.02)T(0.024)T(0.028)NS(0.011)GFAYGQNK	3	-0.72191
sp|P52948|NUP98_HUMAN Nuclear pore complex protein Nup98-Nup96 OS=Homo sapiens OX=9606 GN=NUP98 PE=1 SV=4	P52948	236	61.759	KGPQNQVGAGT(0.004)T(0.005)T(0.002)GLFGS(0.037)S(0.037)PAT(0.256)S(0.256)S(0.256)AT(0.107)GLFS(0.011)S(0.005)S(0.005)T(0.005)T(0.005)NS(0.004)GFAYGQNK	4	-0.5985
sp|P52948|NUP98_HUMAN Nuclear pore complex protein Nup98-Nup96 OS=Homo sapiens OX=9606 GN=NUP98 PE=1 SV=4	P52948	262	48.655	T(0.219)AFGT(0.518)S(0.331)T(0.304)T(0.304)GFGT(0.258)NPGGLFGQQNQQT(0.001)T(0.001)S(0.033)LFS(0.032)K	3	0.5913
sp|P61803|DAD1_HUMAN Dolichyl-diphosphooligosaccharide--protein glycosyltransferase subunit DAD1 OS=Homo sapiens OX=9606 GN=DAD1 PE=1 SV=3	P61803	7	47.823	MS(0.012)AS(0.308)VVS(0.906)VIS(0.775)R	2	-1.3209
sp|P61803|DAD1_HUMAN Dolichyl-diphosphooligosaccharide--protein glycosyltransferase subunit DAD1 OS=Homo sapiens OX=9606 GN=DAD1 PE=1 SV=3	P61803	10	47.823	MS(0.012)AS(0.308)VVS(0.906)VIS(0.775)R	2	-1.3209
sp|P78364|PHC1_HUMAN Polyhomeotic-like protein 1 OS=Homo sapiens OX=9606 GN=PHC1 PE=1 SV=3	P78364	555	97.188	QPGTAQAQALGLAQLAAAVPTS(1)R	3	0.41468
sp|P85037|FOXK1_HUMAN Forkhead box protein K1 OS=Homo sapiens OX=9606 GN=FOXK1 PE=1 SV=1	P85037	428	42.806	S(0.04)APAS(0.04)PT(0.037)HPGLMS(0.875)PRS(0.011)GGLQT(0.05)PECLS(0.948)R	3	3.1307
sp|P85037|FOXK1_HUMAN Forkhead box protein K1 OS=Homo sapiens OX=9606 GN=FOXK1 PE=1 SV=1	P85037	441	42.806	S(0.04)APAS(0.04)PT(0.037)HPGLMS(0.875)PRS(0.011)GGLQT(0.05)PECLS(0.948)R	3	3.1307
sp|Q01082|SPTB2_HUMAN Spectrin beta chain, non-erythrocytic 1 OS=Homo sapiens OX=9606 GN=SPTBN1 PE=1 SV=2	Q01082	2316	162.88	HEVS(0.036)AS(0.474)TQS(0.153)T(0.032)PAS(0.153)S(0.153)R	2	-1.4398
sp|Q01082|SPTB2_HUMAN Spectrin beta chain, non-erythrocytic 1 OS=Homo sapiens OX=9606 GN=SPTBN1 PE=1 SV=2	Q01082	2319	116.58	HEVS(0.011)AS(0.046)TQS(0.375)TPAS(0.375)S(0.192)R	2	0.94162
sp|Q01082|SPTB2_HUMAN Spectrin beta chain, non-erythrocytic 1 OS=Homo sapiens OX=9606 GN=SPTBN1 PE=1 SV=2	Q01082	2323	262.73	HEVSAS(0.025)TQS(0.125)T(0.001)PAS(0.425)S(0.425)R	2	0.54169
sp|Q01082|SPTB2_HUMAN Spectrin beta chain, non-erythrocytic 1 OS=Homo sapiens OX=9606 GN=SPTBN1 PE=1 SV=2	Q01082	2324	262.73	HEVSAS(0.025)TQS(0.125)T(0.001)PAS(0.425)S(0.425)R	2	0.54169
sp|Q03164|KMT2A_HUMAN Histone-lysine N-methyltransferase 2A OS=Homo sapiens OX=9606 GN=KMT2A PE=1 SV=5	Q03164	3050	52.721	YVPNS(0.306)T(0.306)DS(0.306)PGPS(0.079)QIS(0.002)NAAVQTTPPHLKPATEK	4	-0.92774
sp|Q03164|KMT2A_HUMAN Histone-lysine N-methyltransferase 2A OS=Homo sapiens OX=9606 GN=KMT2A PE=1 SV=5	Q03164	3053	52.721	YVPNS(0.306)T(0.306)DS(0.306)PGPS(0.079)QIS(0.002)NAAVQTTPPHLKPATEK	4	-0.92774
sp|Q07001|ACHD_HUMAN Acetylcholine receptor subunit delta OS=Homo sapiens OX=9606 GN=CHRND PE=1 SV=1	Q07001	303	59.931	LPAT(0.5)S(0.5)MAIPLIGK	2	0.12097
sp|Q08188|TGM3_HUMAN Protein-glutamine gamma-glutamyltransferase E OS=Homo sapiens OX=9606 GN=TGM3 PE=1 SV=4	Q08188	209	48.602	DAAT(1)DVAS(1)R	1	1.8631
sp|Q12830|BPTF_HUMAN Nucleosome-remodeling factor subunit BPTF OS=Homo sapiens OX=9606 GN=BPTF PE=1 SV=3	Q12830	2229	123.63	GQPVS(0.858)T(0.015)AVS(0.1)APNTVS(0.013)S(0.013)TPGQK	2	-0.30314
sp|Q12830|BPTF_HUMAN Nucleosome-remodeling factor subunit BPTF OS=Homo sapiens OX=9606 GN=BPTF PE=1 SV=3	Q12830	2233	101.28	GQPVS(0.16)T(0.02)AVS(0.579)APNTVS(0.12)S(0.12)TPGQK	2	-1.201
sp|Q12830|BPTF_HUMAN Nucleosome-remodeling factor subunit BPTF OS=Homo sapiens OX=9606 GN=BPTF PE=1 SV=3	Q12830	2239	144.74	GQPVS(0.006)T(0.006)AVS(0.011)APNT(0.028)VS(0.475)S(0.475)TPGQK	3	0.59891
sp|Q12830|BPTF_HUMAN Nucleosome-remodeling factor subunit BPTF OS=Homo sapiens OX=9606 GN=BPTF PE=1 SV=3	Q12830	2240	144.74	GQPVS(0.165)T(0.02)AVS(0.129)APNTVS(0.069)S(0.617)TPGQK	3	-0.21831
sp|Q12830|BPTF_HUMAN Nucleosome-remodeling factor subunit BPTF OS=Homo sapiens OX=9606 GN=BPTF PE=1 SV=3	Q12830	2057	52.721	LEQQKPT(0.192)VIAT(0.422)S(0.377)T(0.37)T(0.37)S(0.129)PT(0.045)S(0.023)S(0.023)T(0.006)T(0.002)S(0.021)T(0.001)IS(0.02)PAQK	3	-0.32311
sp|Q12830|BPTF_HUMAN Nucleosome-remodeling factor subunit BPTF OS=Homo sapiens OX=9606 GN=BPTF PE=1 SV=3	Q12830	2063	46.983	LEQQKPT(0.052)VIAT(0.283)S(0.264)T(0.436)T(0.217)S(0.089)PT(0.033)S(0.176)S(0.173)T(0.006)T(0.006)S(0.135)T(0.001)IS(0.129)PAQK	3	-0.34929
sp|Q12830|BPTF_HUMAN Nucleosome-remodeling factor subunit BPTF OS=Homo sapiens OX=9606 GN=BPTF PE=1 SV=3	Q12830	2064	49.464	LEQQKPT(0.003)VIAT(0.114)S(0.251)T(0.315)T(0.315)S(0.266)PT(0.2)S(0.068)S(0.178)T(0.016)T(0.019)S(0.14)T(0.002)IS(0.113)PAQK	3	-0.36585
sp|Q12830|BPTF_HUMAN Nucleosome-remodeling factor subunit BPTF OS=Homo sapiens OX=9606 GN=BPTF PE=1 SV=3	Q12830	2067	53.622	LEQQKPT(0.016)VIAT(0.233)S(0.265)T(0.257)T(0.257)S(0.137)PT(0.137)S(0.174)S(0.081)T(0.025)T(0.032)S(0.195)T(0.008)IS(0.184)PAQK	3	-0.18022
sp|Q12830|BPTF_HUMAN Nucleosome-remodeling factor subunit BPTF OS=Homo sapiens OX=9606 GN=BPTF PE=1 SV=3	Q12830	2070	53.622	LEQQKPT(0.016)VIAT(0.233)S(0.265)T(0.257)T(0.257)S(0.137)PT(0.137)S(0.174)S(0.081)T(0.025)T(0.032)S(0.195)T(0.008)IS(0.184)PAQK	3	-0.18022
sp|Q12830|BPTF_HUMAN Nucleosome-remodeling factor subunit BPTF OS=Homo sapiens OX=9606 GN=BPTF PE=1 SV=3	Q12830	1749	80.371	S(0.975)T(0.014)VT(0.001)T(0.008)T(0.002)TTTVTK	2	0.33886
sp|Q12830|BPTF_HUMAN Nucleosome-remodeling factor subunit BPTF OS=Homo sapiens OX=9606 GN=BPTF PE=1 SV=3	Q12830	1725	60.332	T(0.006)VIT(0.253)EVT(0.108)T(0.032)MT(0.003)S(0.039)T(0.003)VATES(0.556)K	3	0.36376
sp|Q12830|BPTF_HUMAN Nucleosome-remodeling factor subunit BPTF OS=Homo sapiens OX=9606 GN=BPTF PE=1 SV=3	Q12830	2081	107.11	VMVAPIS(0.743)GS(0.257)VTTGTK	2	-0.185
sp|Q12830|BPTF_HUMAN Nucleosome-remodeling factor subunit BPTF OS=Homo sapiens OX=9606 GN=BPTF PE=1 SV=3	Q12830	2083	101.75	VMVAPIS(0.324)GS(0.675)VTTGTK	2	-0.49504
sp|Q12888|TP53B_HUMAN TP53-binding protein 1 OS=Homo sapiens OX=9606 GN=TP53BP1 PE=1 SV=2	Q12888	1631	57.328	S(0.273)NVS(0.273)S(0.273)PATPTAS(0.047)S(0.033)S(0.033)S(0.033)S(0.033)TTPTR	2	-1.3549
sp|Q12888|TP53B_HUMAN TP53-binding protein 1 OS=Homo sapiens OX=9606 GN=TP53BP1 PE=1 SV=2	Q12888	1634	57.328	S(0.273)NVS(0.273)S(0.273)PATPTAS(0.047)S(0.033)S(0.033)S(0.033)S(0.033)TTPTR	2	-1.3549
sp|Q12888|TP53B_HUMAN TP53-binding protein 1 OS=Homo sapiens OX=9606 GN=TP53BP1 PE=1 SV=2	Q12888	1635	57.328	S(0.273)NVS(0.273)S(0.273)PATPTAS(0.047)S(0.033)S(0.033)S(0.033)S(0.033)TTPTR	2	-1.3549
sp|Q12948|FOXC1_HUMAN Forkhead box protein C1 OS=Homo sapiens OX=9606 GN=FOXC1 PE=1 SV=3	Q12948	320	88.394	GS(0.607)PQS(0.022)AAAELS(0.085)S(0.085)GLLAS(0.133)AAAS(0.033)S(0.033)R	3	0.18289
sp|Q12948|FOXC1_HUMAN Forkhead box protein C1 OS=Homo sapiens OX=9606 GN=FOXC1 PE=1 SV=3	Q12948	335	54.12	GS(0.003)PQS(0.003)AAAELS(0.127)S(0.127)GLLAS(0.304)AAAS(0.217)S(0.217)R	2	-0.0066196
sp|Q12948|FOXC1_HUMAN Forkhead box protein C1 OS=Homo sapiens OX=9606 GN=FOXC1 PE=1 SV=3	Q12948	339	49.662	GS(0.005)PQS(0.005)AAAELS(0.033)S(0.095)GLLAS(0.287)AAAS(0.287)S(0.287)R	2	0.5257
sp|Q12948|FOXC1_HUMAN Forkhead box protein C1 OS=Homo sapiens OX=9606 GN=FOXC1 PE=1 SV=3	Q12948	340	49.662	GS(0.005)PQS(0.005)AAAELS(0.033)S(0.095)GLLAS(0.287)AAAS(0.287)S(0.287)R	2	0.5257
sp|Q13439|GOGA4_HUMAN Golgin subfamily A member 4 OS=Homo sapiens OX=9606 GN=GOLGA4 PE=1 SV=1	Q13439	1631	61.03	ALEDRLES(1)ES(1)AAK	2	-1.2559
sp|Q13439|GOGA4_HUMAN Golgin subfamily A member 4 OS=Homo sapiens OX=9606 GN=GOLGA4 PE=1 SV=1	Q13439	1633	61.03	ALEDRLES(1)ES(1)AAK	2	-1.2559
sp|Q13492|PICAL_HUMAN Phosphatidylinositol-binding clathrin assembly protein OS=Homo sapiens OX=9606 GN=PICALM PE=1 SV=2	Q13492	362	41.287	KPHT(0.044)S(0.044)LT(0.044)T(0.059)AAS(0.204)PVS(0.243)T(0.048)S(0.053)AGGIMT(0.243)APAIDIFS(0.003)TPS(0.003)S(0.003)S(0.003)NS(0.003)TS(0.003)K	4	-0.35367
sp|Q13620|CUL4B_HUMAN Cullin-4B OS=Homo sapiens OX=9606 GN=CUL4B PE=1 SV=4	Q13620	138	135.98	MAEES(0.471)S(0.133)S(0.133)S(0.021)S(0.044)S(0.044)S(0.044)S(0.044)S(0.044)PT(0.007)AATS(0.014)QQQQLK	3	-1.8374
sp|Q13620|CUL4B_HUMAN Cullin-4B OS=Homo sapiens OX=9606 GN=CUL4B PE=1 SV=4	Q13620	139	135.98	MAEES(0.195)S(0.231)S(0.231)S(0.068)S(0.068)S(0.018)S(0.062)S(0.062)S(0.062)PT(0.001)AATS(0.004)QQQQLK	3	-1.1553
sp|Q13620|CUL4B_HUMAN Cullin-4B OS=Homo sapiens OX=9606 GN=CUL4B PE=1 SV=4	Q13620	140	135.98	MAEES(0.003)S(0.016)S(0.41)S(0.41)S(0.123)S(0.028)S(0.009)SSPTAATSQQQQLK	2	-0.083713
sp|Q13620|CUL4B_HUMAN Cullin-4B OS=Homo sapiens OX=9606 GN=CUL4B PE=1 SV=4	Q13620	141	135.98	MAEES(0.003)S(0.016)S(0.41)S(0.41)S(0.123)S(0.028)S(0.009)SSPTAATSQQQQLK	2	-0.083713
sp|Q13620|CUL4B_HUMAN Cullin-4B OS=Homo sapiens OX=9606 GN=CUL4B PE=1 SV=4	Q13620	142	135.98	MAEES(0.022)S(0.022)S(0.022)S(0.022)S(0.857)S(0.045)S(0.002)S(0.001)SPTAATS(0.008)QQQQLK	2	-0.56992
sp|Q13698|CAC1S_HUMAN Voltage-dependent L-type calcium channel subunit alpha-1S OS=Homo sapiens OX=9606 GN=CACNA1S PE=1 SV=4	Q13698	4	57.59	EPS(0.998)S(0.002)PQDEGLRK	2	-0.8936
sp|Q13790|APOF_HUMAN Apolipoprotein F OS=Homo sapiens OX=9606 GN=APOF PE=1 SV=2	Q13790	8	53.861	T(1)GLCGYS(1)APDMRGLR	3	-1.1221
sp|Q13886|KLF9_HUMAN Krueppel-like factor 9 OS=Homo sapiens OX=9606 GN=KLF9 PE=1 SV=1	Q13886	2	44.567	S(0.737)AAAYMDFVAAQCLVS(0.132)IS(0.132)NR	2	-0.60579
sp|Q13936|CAC1C_HUMAN Voltage-dependent L-type calcium channel subunit alpha-1C OS=Homo sapiens OX=9606 GN=CACNA1C PE=1 SV=4	Q13936	1718	46.955	RAIS(0.995)GDLT(0.005)AEEELDK	2	-3.2502
sp|Q14004|CDK13_HUMAN Cyclin-dependent kinase 13 OS=Homo sapiens OX=9606 GN=CDK13 PE=1 SV=2	Q14004	1288	55.985	T(0.032)ENQHVPT(0.003)T(0.004)S(0.32)S(0.32)S(0.32)LTDPHAGVK	3	0.88396
sp|Q14004|CDK13_HUMAN Cyclin-dependent kinase 13 OS=Homo sapiens OX=9606 GN=CDK13 PE=1 SV=2	Q14004	1289	55.985	T(0.032)ENQHVPT(0.003)T(0.004)S(0.32)S(0.32)S(0.32)LTDPHAGVK	3	0.88396
sp|Q14004|CDK13_HUMAN Cyclin-dependent kinase 13 OS=Homo sapiens OX=9606 GN=CDK13 PE=1 SV=2	Q14004	1290	55.985	T(0.022)ENQHVPT(0.095)T(0.095)S(0.047)S(0.156)S(0.581)LT(0.003)DPHAGVK	4	-0.41223
sp|Q14119|VEZF1_HUMAN Vascular endothelial zinc finger 1 OS=Homo sapiens OX=9606 GN=VEZF1 PE=1 SV=2	Q14119	117	94.301	KT(0.001)PT(0.001)T(0.001)VVPLIS(0.931)T(0.924)IAGDS(0.046)S(0.097)R	3	-0.60411
sp|Q14119|VEZF1_HUMAN Vascular endothelial zinc finger 1 OS=Homo sapiens OX=9606 GN=VEZF1 PE=1 SV=2	Q14119	123	94.301	KT(0.33)PT(0.024)T(0.002)VVPLIS(0.021)TIAGDS(0.552)S(0.071)R	3	0.32733
sp|Q14119|VEZF1_HUMAN Vascular endothelial zinc finger 1 OS=Homo sapiens OX=9606 GN=VEZF1 PE=1 SV=2	Q14119	124	72.771	KT(0.702)PT(0.181)T(0.175)VVPLIS(0.173)T(0.016)IAGDS(0.204)S(0.548)R	3	-1.0572
sp|Q14119|VEZF1_HUMAN Vascular endothelial zinc finger 1 OS=Homo sapiens OX=9606 GN=VEZF1 PE=1 SV=2	Q14119	137	50.029	T(0.001)S(0.018)LVS(0.018)T(0.017)IAGILS(0.107)T(0.107)VT(0.107)T(0.107)S(0.107)S(0.107)S(0.107)GT(0.107)NPS(0.019)S(0.019)S(0.019)AS(0.019)TTAMPVTQS(0.018)VK	4	0.21738
sp|Q14119|VEZF1_HUMAN Vascular endothelial zinc finger 1 OS=Homo sapiens OX=9606 GN=VEZF1 PE=1 SV=2	Q14119	142	50.029	T(0.001)S(0.018)LVS(0.018)T(0.017)IAGILS(0.107)T(0.107)VT(0.107)T(0.107)S(0.107)S(0.107)S(0.107)GT(0.107)NPS(0.019)S(0.019)S(0.019)AS(0.019)TTAMPVTQS(0.018)VK	4	0.21738
sp|Q14119|VEZF1_HUMAN Vascular endothelial zinc finger 1 OS=Homo sapiens OX=9606 GN=VEZF1 PE=1 SV=2	Q14119	143	50.029	T(0.001)S(0.018)LVS(0.018)T(0.017)IAGILS(0.107)T(0.107)VT(0.107)T(0.107)S(0.107)S(0.107)S(0.107)GT(0.107)NPS(0.019)S(0.019)S(0.019)AS(0.019)TTAMPVTQS(0.018)VK	4	0.21738
sp|Q14119|VEZF1_HUMAN Vascular endothelial zinc finger 1 OS=Homo sapiens OX=9606 GN=VEZF1 PE=1 SV=2	Q14119	144	50.029	T(0.001)S(0.018)LVS(0.018)T(0.017)IAGILS(0.107)T(0.107)VT(0.107)T(0.107)S(0.107)S(0.107)S(0.107)GT(0.107)NPS(0.019)S(0.019)S(0.019)AS(0.019)TTAMPVTQS(0.018)VK	4	0.21738
sp|Q14157|UBP2L_HUMAN Ubiquitin-associated protein 2-like OS=Homo sapiens OX=9606 GN=UBAP2L PE=1 SV=2	Q14157	439	59.561	S(0.777)PAVAT(0.107)S(0.085)T(0.022)AAPPPPS(0.003)S(0.003)PLPS(0.003)K	3	-0.14141
sp|Q14157|UBP2L_HUMAN Ubiquitin-associated protein 2-like OS=Homo sapiens OX=9606 GN=UBAP2L PE=1 SV=2	Q14157	445	163.44	S(0.078)PAVAT(0.112)S(0.758)T(0.051)AAPPPPSSPLPSK	3	-0.42905
sp|Q14157|UBP2L_HUMAN Ubiquitin-associated protein 2-like OS=Homo sapiens OX=9606 GN=UBAP2L PE=1 SV=2	Q14157	453	163.44	S(0.022)PAVATS(0.244)TAAPPPPS(0.244)S(0.244)PLPS(0.244)K	2	-0.20538
sp|Q14157|UBP2L_HUMAN Ubiquitin-associated protein 2-like OS=Homo sapiens OX=9606 GN=UBAP2L PE=1 SV=2	Q14157	454	163.44	S(0.022)PAVATS(0.244)TAAPPPPS(0.244)S(0.244)PLPS(0.244)K	2	-0.20538
sp|Q14157|UBP2L_HUMAN Ubiquitin-associated protein 2-like OS=Homo sapiens OX=9606 GN=UBAP2L PE=1 SV=2	Q14157	458	163.44	S(0.022)PAVATS(0.244)TAAPPPPS(0.244)S(0.244)PLPS(0.244)K	2	-0.20538
sp|Q14671|PUM1_HUMAN Pumilio homolog 1 OS=Homo sapiens OX=9606 GN=PUM1 PE=1 SV=3	Q14671	797	63.69	S(0.636)AS(0.11)S(0.079)AS(0.079)S(0.014)LFS(0.014)PS(0.014)S(0.014)TLFS(0.014)S(0.014)S(0.014)R	3	0.66621
sp|Q14671|PUM1_HUMAN Pumilio homolog 1 OS=Homo sapiens OX=9606 GN=PUM1 PE=1 SV=3	Q14671	799	61.409	S(0.146)AS(0.664)S(0.146)AS(0.016)S(0.012)LFS(0.004)PS(0.004)S(0.002)TLFS(0.002)S(0.002)S(0.002)R	2	0.23913
sp|Q14671|PUM1_HUMAN Pumilio homolog 1 OS=Homo sapiens OX=9606 GN=PUM1 PE=1 SV=3	Q14671	814	60.334	S(0.021)AS(0.021)S(0.024)AS(0.024)S(0.024)LFS(0.028)PS(0.028)S(0.094)TLFS(0.094)S(0.322)S(0.322)R	2	-0.65281
sp|Q14671|PUM1_HUMAN Pumilio homolog 1 OS=Homo sapiens OX=9606 GN=PUM1 PE=1 SV=3	Q14671	815	60.334	S(0.021)AS(0.021)S(0.024)AS(0.024)S(0.024)LFS(0.028)PS(0.028)S(0.094)TLFS(0.094)S(0.322)S(0.322)R	2	-0.65281
sp|Q14676|MDC1_HUMAN Mediator of DNA damage checkpoint protein 1 OS=Homo sapiens OX=9606 GN=MDC1 PE=1 SV=3	Q14676	1122	57.097	MT(0.043)PFPAT(0.475)S(0.475)AAPEPHPS(0.002)T(0.002)S(0.001)T(0.001)AQPVTPKPTSQATR	4	-0.36
sp|Q14678|KANK1_HUMAN KN motif and ankyrin repeat domain-containing protein 1 OS=Homo sapiens OX=9606 GN=KANK1 PE=1 SV=3	Q14678	735	56.25	S(0.946)IGVGT(0.641)LLS(0.38)GHS(0.022)GFDRPS(0.011)AVK	2	-0.38278
sp|Q14684|RRP1B_HUMAN Ribosomal RNA processing protein 1 homolog B OS=Homo sapiens OX=9606 GN=RRP1B PE=1 SV=3	Q14684	731	161.87	T(0.003)PT(0.047)S(0.42)S(0.42)PAS(0.055)S(0.055)PLVAK	2	-0.11001
sp|Q14684|RRP1B_HUMAN Ribosomal RNA processing protein 1 homolog B OS=Homo sapiens OX=9606 GN=RRP1B PE=1 SV=3	Q14684	732	161.87	T(0.003)PT(0.047)S(0.42)S(0.42)PAS(0.055)S(0.055)PLVAK	2	-0.11001
sp|Q14684|RRP1B_HUMAN Ribosomal RNA processing protein 1 homolog B OS=Homo sapiens OX=9606 GN=RRP1B PE=1 SV=3	Q14684	735	161.87	TPTS(0.25)S(0.25)PAS(0.25)S(0.25)PLVAK	2	-0.71811
sp|Q14684|RRP1B_HUMAN Ribosomal RNA processing protein 1 homolog B OS=Homo sapiens OX=9606 GN=RRP1B PE=1 SV=3	Q14684	736	161.87	TPTS(0.25)S(0.25)PAS(0.25)S(0.25)PLVAK	2	-0.71811
sp|Q14686|NCOA6_HUMAN Nuclear receptor coactivator 6 OS=Homo sapiens OX=9606 GN=NCOA6 PE=1 SV=3	Q14686	1924	65.207	S(0.011)IVT(0.002)TLVPS(0.817)ELIS(0.169)AVPTTK	3	-0.0029425
sp|Q14686|NCOA6_HUMAN Nuclear receptor coactivator 6 OS=Homo sapiens OX=9606 GN=NCOA6 PE=1 SV=3	Q14686	1641	160.48	VMVS(0.706)EGQS(0.187)AAQS(0.107)NAR	2	0.45693
sp|Q14686|NCOA6_HUMAN Nuclear receptor coactivator 6 OS=Homo sapiens OX=9606 GN=NCOA6 PE=1 SV=3	Q14686	1645	160.48	VMVS(0.5)EGQS(0.5)AAQS(0.001)NAR	2	0.56713
sp|Q14686|NCOA6_HUMAN Nuclear receptor coactivator 6 OS=Homo sapiens OX=9606 GN=NCOA6 PE=1 SV=3	Q14686	1649	88.385	VMVS(0.006)EGQS(0.497)AAQS(0.497)NAR	3	0.10922
sp|Q14894|CRYM_HUMAN Ketimine reductase mu-crystallin OS=Homo sapiens OX=9606 GN=CRYM PE=1 SV=1	Q14894	2	40.384	MS(0.563)RVPAFLS(0.437)AAEVEEHLR	3	1.5593
sp|Q15637|SF01_HUMAN Splicing factor 1 OS=Homo sapiens OX=9606 GN=SF1 PE=1 SV=4	Q15637	315	66.454	EYLS(0.973)LMAELGEAPVPAS(0.018)VGS(0.004)TS(0.002)GPATTPLAS(0.002)APR	3	-0.28709
sp|Q15637|SF01_HUMAN Splicing factor 1 OS=Homo sapiens OX=9606 GN=SF1 PE=1 SV=4	Q15637	328	58.446	EYLS(0.217)LMAELGEAPVPAS(0.229)VGS(0.194)T(0.001)S(0.194)GPATTPLAS(0.165)APR	3	-0.012277
sp|Q15723|ELF2_HUMAN ETS-related transcription factor Elf-2 OS=Homo sapiens OX=9606 GN=ELF2 PE=1 SV=2	Q15723	372	76.713	S(0.564)PT(0.621)T(0.273)T(0.253)AS(0.174)VS(0.114)AT(0.001)AAPR	3	-0.21186
sp|Q15723|ELF2_HUMAN ETS-related transcription factor Elf-2 OS=Homo sapiens OX=9606 GN=ELF2 PE=1 SV=2	Q15723	378	113.35	S(0.03)PT(0.337)T(0.032)TAS(0.447)VS(0.154)ATAAPR	2	0.28621
sp|Q15723|ELF2_HUMAN ETS-related transcription factor Elf-2 OS=Homo sapiens OX=9606 GN=ELF2 PE=1 SV=2	Q15723	380	86.738	S(0.491)PT(0.011)T(0.058)T(0.467)AS(0.366)VS(0.599)AT(0.006)AAPR	2	0.27566
sp|Q15723|ELF2_HUMAN ETS-related transcription factor Elf-2 OS=Homo sapiens OX=9606 GN=ELF2 PE=1 SV=2	Q15723	575	43.534	T(0.001)VT(0.001)HVVVVS(0.138)APS(0.826)AIALPVT(0.035)MK	3	-0.41958
sp|Q15735|PI5PA_HUMAN Phosphatidylinositol 4,5-bisphosphate 5-phosphatase A OS=Homo sapiens OX=9606 GN=INPP5J PE=1 SV=3	Q15735	5	54.7	MEGQS(0.894)S(0.313)RGS(0.793)R	2	0.17301
sp|Q15735|PI5PA_HUMAN Phosphatidylinositol 4,5-bisphosphate 5-phosphatase A OS=Homo sapiens OX=9606 GN=INPP5J PE=1 SV=3	Q15735	9	54.7	MEGQS(0.894)S(0.313)RGS(0.793)R	2	0.17301
sp|Q15750|TAB1_HUMAN TGF-beta-activated kinase 1 and MAP3K7-binding protein 1 OS=Homo sapiens OX=9606 GN=TAB1 PE=1 SV=1	Q15750	391	99.069	VYPVS(0.878)VPYS(0.045)S(0.045)AQS(0.016)TS(0.016)K	2	0.33213
sp|Q15750|TAB1_HUMAN TGF-beta-activated kinase 1 and MAP3K7-binding protein 1 OS=Homo sapiens OX=9606 GN=TAB1 PE=1 SV=1	Q15750	395	106.6	VYPVS(0.05)VPYS(0.238)S(0.238)AQS(0.238)TS(0.238)K	2	0.072503
sp|Q15750|TAB1_HUMAN TGF-beta-activated kinase 1 and MAP3K7-binding protein 1 OS=Homo sapiens OX=9606 GN=TAB1 PE=1 SV=1	Q15750	396	106.6	VYPVS(0.05)VPYS(0.238)S(0.238)AQS(0.238)TS(0.238)K	2	0.072503
sp|Q15750|TAB1_HUMAN TGF-beta-activated kinase 1 and MAP3K7-binding protein 1 OS=Homo sapiens OX=9606 GN=TAB1 PE=1 SV=1	Q15750	399	106.6	VYPVS(0.05)VPYS(0.238)S(0.238)AQS(0.238)TS(0.238)K	2	0.072503
sp|Q15750|TAB1_HUMAN TGF-beta-activated kinase 1 and MAP3K7-binding protein 1 OS=Homo sapiens OX=9606 GN=TAB1 PE=1 SV=1	Q15750	401	106.6	VYPVS(0.05)VPYS(0.238)S(0.238)AQS(0.238)TS(0.238)K	2	0.072503
sp|Q16186|ADRM1_HUMAN Proteasomal ubiquitin receptor ADRM1 OS=Homo sapiens OX=9606 GN=ADRM1 PE=1 SV=2	Q16186	219	168.47	S(0.001)QS(0.001)AAVT(0.002)PS(0.374)S(0.374)T(0.001)TS(0.123)S(0.123)TR	2	-0.15748
sp|Q16186|ADRM1_HUMAN Proteasomal ubiquitin receptor ADRM1 OS=Homo sapiens OX=9606 GN=ADRM1 PE=1 SV=2	Q16186	220	168.47	S(0.001)QS(0.001)AAVT(0.002)PS(0.374)S(0.374)T(0.001)TS(0.123)S(0.123)TR	2	-0.15748
sp|Q16186|ADRM1_HUMAN Proteasomal ubiquitin receptor ADRM1 OS=Homo sapiens OX=9606 GN=ADRM1 PE=1 SV=2	Q16186	223	183.76	SQSAAVTPS(0.114)S(0.114)TTS(0.386)S(0.386)TR	2	-0.66595
sp|Q16186|ADRM1_HUMAN Proteasomal ubiquitin receptor ADRM1 OS=Homo sapiens OX=9606 GN=ADRM1 PE=1 SV=2	Q16186	224	183.76	SQSAAVTPS(0.114)S(0.114)TTS(0.386)S(0.386)TR	2	-0.66595
sp|Q2KHR2|RFX7_HUMAN DNA-binding protein RFX7 OS=Homo sapiens OX=9606 GN=RFX7 PE=1 SV=2	Q2KHR2	440	99.283	PANT(0.001)S(0.999)ALTIR	2	0.054153
sp|Q2KHR3|QSER1_HUMAN Glutamine and serine-rich protein 1 OS=Homo sapiens OX=9606 GN=QSER1 PE=1 SV=3	Q2KHR3	1272	85.42	KTEALQVAT(0.026)T(0.453)S(0.453)PT(0.026)ANT(0.002)TGTAT(0.001)TS(0.019)S(0.019)TTVGAVK	3	-0.054179
sp|Q2KHR3|QSER1_HUMAN Glutamine and serine-rich protein 1 OS=Homo sapiens OX=9606 GN=QSER1 PE=1 SV=3	Q2KHR3	105	95.854	T(0.386)S(0.614)QGTVPTALAFER	2	0.88101
sp|Q4G0S4|C27C1_HUMAN Cytochrome P450 27C1 OS=Homo sapiens OX=9606 GN=CYP27C1 PE=1 SV=3	Q4G0S4	4	57.047	QT(0.101)S(0.899)AMALLAR	2	0.041238
sp|Q4KMP7|TB10B_HUMAN TBC1 domain family member 10B OS=Homo sapiens OX=9606 GN=TBC1D10B PE=1 SV=3	Q4KMP7	47	110.91	AGPVVVVAPGPPVT(0.02)T(0.004)AT(0.001)S(0.975)APVTLVAPGEAR	3	-0.01111
sp|Q4VCS5|AMOT_HUMAN Angiomotin OS=Homo sapiens OX=9606 GN=AMOT PE=1 SV=1	Q4VCS5	196	101.92	AHPPVT(0.163)S(0.779)APLS(0.058)PPQPNDLYK	3	-0.47641
sp|Q4VCS5|AMOT_HUMAN Angiomotin OS=Homo sapiens OX=9606 GN=AMOT PE=1 SV=1	Q4VCS5	200	94.72	AHPPVT(0.001)S(0.09)APLS(0.909)PPQPNDLYK	3	0.38039
sp|Q5H9F3|BCORL_HUMAN BCL-6 corepressor-like protein 1 OS=Homo sapiens OX=9606 GN=BCORL1 PE=1 SV=2	Q5H9F3	127	91.202	LPAS(0.25)DS(0.25)AEAS(0.25)NS(0.25)R	2	0.53633
sp|Q5H9F3|BCORL_HUMAN BCL-6 corepressor-like protein 1 OS=Homo sapiens OX=9606 GN=BCORL1 PE=1 SV=2	Q5H9F3	129	91.202	LPAS(0.25)DS(0.25)AEAS(0.25)NS(0.25)R	2	0.53633
sp|Q5H9F3|BCORL_HUMAN BCL-6 corepressor-like protein 1 OS=Homo sapiens OX=9606 GN=BCORL1 PE=1 SV=2	Q5H9F3	133	91.202	LPAS(0.125)DS(0.125)AEAS(0.375)NS(0.375)R	2	1.1655
sp|Q5H9F3|BCORL_HUMAN BCL-6 corepressor-like protein 1 OS=Homo sapiens OX=9606 GN=BCORL1 PE=1 SV=2	Q5H9F3	135	91.202	LPAS(0.166)DS(0.166)AEAS(0.166)NS(0.503)R	2	1.1568
sp|Q5JRA6|TGO1_HUMAN Transport and Golgi organization protein 1 homolog OS=Homo sapiens OX=9606 GN=MIA3 PE=1 SV=1	Q5JRA6	1096	70.897	VIGDTHAS(0.5)EVS(0.5)QKPNTEK	3	-0.10825
sp|Q5JRA6|TGO1_HUMAN Transport and Golgi organization protein 1 homolog OS=Homo sapiens OX=9606 GN=MIA3 PE=1 SV=1	Q5JRA6	1099	70.897	VIGDTHAS(0.5)EVS(0.5)QKPNTEK	3	-0.10825
sp|Q5JSZ5|PRC2B_HUMAN Protein PRRC2B OS=Homo sapiens OX=9606 GN=PRRC2B PE=1 SV=2	Q5JSZ5	1982	66.779	GGLPVS(0.415)QS(0.415)QEIFS(0.085)S(0.085)LQPFR	2	-0.65341
sp|Q5JSZ5|PRC2B_HUMAN Protein PRRC2B OS=Homo sapiens OX=9606 GN=PRRC2B PE=1 SV=2	Q5JSZ5	1984	66.779	GGLPVS(0.415)QS(0.415)QEIFS(0.085)S(0.085)LQPFR	2	-0.65341
sp|Q5JSZ5|PRC2B_HUMAN Protein PRRC2B OS=Homo sapiens OX=9606 GN=PRRC2B PE=1 SV=2	Q5JSZ5	1989	80.002	GGLPVS(0.056)QS(0.056)QEIFS(0.444)S(0.444)LQPFR	3	-0.37258
sp|Q5JSZ5|PRC2B_HUMAN Protein PRRC2B OS=Homo sapiens OX=9606 GN=PRRC2B PE=1 SV=2	Q5JSZ5	1990	80.002	GGLPVS(0.201)QS(0.158)QEIFS(0.116)S(0.526)LQPFR	3	-0.090227
sp|Q5T0B9|ZN362_HUMAN Zinc finger protein 362 OS=Homo sapiens OX=9606 GN=ZNF362 PE=1 SV=1	Q5T0B9	113	94.688	PAT(0.005)S(0.664)T(0.006)VTGLGLS(0.325)TR	2	0.010496
sp|Q5T0B9|ZN362_HUMAN Zinc finger protein 362 OS=Homo sapiens OX=9606 GN=ZNF362 PE=1 SV=1	Q5T0B9	121	80.746	PAT(0.017)S(0.346)T(0.023)VT(0.003)GLGLS(0.61)TR	2	-0.08349
sp|Q5T0B9|ZN362_HUMAN Zinc finger protein 362 OS=Homo sapiens OX=9606 GN=ZNF362 PE=1 SV=1	Q5T0B9	126	49.623	T(0.076)PS(0.227)VS(0.203)T(0.203)S(0.203)ES(0.032)S(0.032)AGAGT(0.008)GT(0.008)GT(0.001)S(0.002)TPS(0.002)TPTTTS(0.002)QS(0.002)R	3	0.095726
sp|Q5T0B9|ZN362_HUMAN Zinc finger protein 362 OS=Homo sapiens OX=9606 GN=ZNF362 PE=1 SV=1	Q5T0B9	128	84.152	T(0.012)PS(0.027)VS(0.476)T(0.479)S(0.476)ES(0.229)S(0.229)AGAGT(0.063)GT(0.002)GTS(0.001)TPS(0.001)TPTTTS(0.002)QS(0.002)R	3	-0.58066
sp|Q5T0B9|ZN362_HUMAN Zinc finger protein 362 OS=Homo sapiens OX=9606 GN=ZNF362 PE=1 SV=1	Q5T0B9	130	84.152	T(0.012)PS(0.027)VS(0.476)T(0.479)S(0.476)ES(0.229)S(0.229)AGAGT(0.063)GT(0.002)GTS(0.001)TPS(0.001)TPTTTS(0.002)QS(0.002)R	3	-0.58066
sp|Q5T0B9|ZN362_HUMAN Zinc finger protein 362 OS=Homo sapiens OX=9606 GN=ZNF362 PE=1 SV=1	Q5T0B9	132	115.66	T(0.002)PS(0.017)VS(0.131)T(0.131)S(0.131)ES(0.623)S(0.623)AGAGT(0.305)GT(0.022)GT(0.001)S(0.002)T(0.003)PS(0.005)T(0.002)PT(0.001)TTS(0.001)QSR	3	0.087873
sp|Q5T0B9|ZN362_HUMAN Zinc finger protein 362 OS=Homo sapiens OX=9606 GN=ZNF362 PE=1 SV=1	Q5T0B9	133	115.66	T(0.002)PS(0.017)VS(0.131)T(0.131)S(0.131)ES(0.623)S(0.623)AGAGT(0.305)GT(0.022)GT(0.001)S(0.002)T(0.003)PS(0.005)T(0.002)PT(0.001)TTS(0.001)QSR	3	0.087873
sp|Q5T0B9|ZN362_HUMAN Zinc finger protein 362 OS=Homo sapiens OX=9606 GN=ZNF362 PE=1 SV=1	Q5T0B9	154	64.224	T(0.004)PS(0.037)VS(0.053)T(0.271)S(0.079)ES(0.111)S(0.116)AGAGT(0.265)GT(0.118)GT(0.045)S(0.018)T(0.014)PS(0.119)T(0.072)PT(0.007)T(0.007)T(0.004)S(0.194)QS(0.465)R	3	-0.02076
sp|Q5T1H1|EYS_HUMAN Protein eyes shut homolog OS=Homo sapiens OX=9606 GN=EYS PE=1 SV=5	Q5T1H1	1321	58.676	IS(0.247)T(0.804)PLES(0.949)YLLQELIVTR	2	-3.7749
sp|Q5T6F2|UBAP2_HUMAN Ubiquitin-associated protein 2 OS=Homo sapiens OX=9606 GN=UBAP2 PE=1 SV=1	Q5T6F2	1006	82.55	GVS(0.266)VS(0.329)S(0.329)S(0.032)T(0.005)T(0.001)GLPDMTGS(0.037)VYNK	2	-0.3594
sp|Q5T6F2|UBAP2_HUMAN Ubiquitin-associated protein 2 OS=Homo sapiens OX=9606 GN=UBAP2 PE=1 SV=1	Q5T6F2	1007	82.55	GVS(0.266)VS(0.329)S(0.329)S(0.032)T(0.005)T(0.001)GLPDMTGS(0.037)VYNK	2	-0.3594
sp|Q5T6F2|UBAP2_HUMAN Ubiquitin-associated protein 2 OS=Homo sapiens OX=9606 GN=UBAP2 PE=1 SV=1	Q5T6F2	1018	67.995	GVS(0.178)VS(0.178)S(0.178)S(0.178)T(0.023)T(0.006)GLPDMTGS(0.261)VYNK	2	1.4618
sp|Q5T6F2|UBAP2_HUMAN Ubiquitin-associated protein 2 OS=Homo sapiens OX=9606 GN=UBAP2 PE=1 SV=1	Q5T6F2	485	47.808	LLQLPS(0.758)T(0.056)T(0.023)IENIS(0.082)VS(0.082)VHQPQPK	3	-0.67569
sp|Q5T6F2|UBAP2_HUMAN Ubiquitin-associated protein 2 OS=Homo sapiens OX=9606 GN=UBAP2 PE=1 SV=1	Q5T6F2	651	77.192	S(1)QQT(0.935)LDT(0.065)PK	2	2.9305
sp|Q5VT52|RPRD2_HUMAN Regulation of nuclear pre-mRNA domain-containing protein 2 OS=Homo sapiens OX=9606 GN=RPRD2 PE=1 SV=1	Q5VT52	396	120.79	S(0.831)AVS(0.14)T(0.002)S(0.027)VPTKPTENIS(0.001)K	3	0.47179
sp|Q5VT52|RPRD2_HUMAN Regulation of nuclear pre-mRNA domain-containing protein 2 OS=Homo sapiens OX=9606 GN=RPRD2 PE=1 SV=1	Q5VT52	399	108.96	S(0.085)AVS(0.785)T(0.78)S(0.32)VPT(0.002)KPTENIS(0.028)K	2	0.22553
sp|Q5VT52|RPRD2_HUMAN Regulation of nuclear pre-mRNA domain-containing protein 2 OS=Homo sapiens OX=9606 GN=RPRD2 PE=1 SV=1	Q5VT52	401	108.96	S(0.019)AVS(0.045)T(0.941)S(0.948)VPT(0.001)KPTENIS(0.045)K	2	-0.029414
sp|Q5VT52|RPRD2_HUMAN Regulation of nuclear pre-mRNA domain-containing protein 2 OS=Homo sapiens OX=9606 GN=RPRD2 PE=1 SV=1	Q5VT52	411	114.01	S(0.004)AVS(0.184)T(0.268)S(0.112)VPTKPTENIS(0.432)K	2	0.29713
sp|Q5VT52|RPRD2_HUMAN Regulation of nuclear pre-mRNA domain-containing protein 2 OS=Homo sapiens OX=9606 GN=RPRD2 PE=1 SV=1	Q5VT52	589	59.68	S(0.891)FNYS(0.066)PNS(0.017)S(0.017)T(0.001)S(0.006)EVS(0.001)S(0.001)TSASK	2	-1.5465
sp|Q5VT52|RPRD2_HUMAN Regulation of nuclear pre-mRNA domain-containing protein 2 OS=Homo sapiens OX=9606 GN=RPRD2 PE=1 SV=1	Q5VT52	593	77.776	S(0.043)FNYS(0.863)PNS(0.011)S(0.011)TS(0.011)EVS(0.011)S(0.011)TS(0.011)AS(0.031)K	2	0.51074
sp|Q5VT52|RPRD2_HUMAN Regulation of nuclear pre-mRNA domain-containing protein 2 OS=Homo sapiens OX=9606 GN=RPRD2 PE=1 SV=1	Q5VT52	596	56.529	S(0.028)FNYS(0.115)PNS(0.155)S(0.155)T(0.092)S(0.114)EVS(0.085)S(0.085)T(0.001)S(0.085)AS(0.085)K	2	-0.1019
sp|Q5VT52|RPRD2_HUMAN Regulation of nuclear pre-mRNA domain-containing protein 2 OS=Homo sapiens OX=9606 GN=RPRD2 PE=1 SV=1	Q5VT52	597	56.529	S(0.028)FNYS(0.115)PNS(0.155)S(0.155)T(0.092)S(0.114)EVS(0.085)S(0.085)T(0.001)S(0.085)AS(0.085)K	2	-0.1019
sp|Q5VT52|RPRD2_HUMAN Regulation of nuclear pre-mRNA domain-containing protein 2 OS=Homo sapiens OX=9606 GN=RPRD2 PE=1 SV=1	Q5VT52	605	75.608	S(0.002)FNYS(0.006)PNS(0.006)S(0.006)T(0.001)S(0.006)EVS(0.042)S(0.042)TS(0.539)AS(0.349)K	2	0.73761
sp|Q5VT52|RPRD2_HUMAN Regulation of nuclear pre-mRNA domain-containing protein 2 OS=Homo sapiens OX=9606 GN=RPRD2 PE=1 SV=1	Q5VT52	976	50.873	S(0.092)LFS(0.804)PQNT(0.037)LAAPTGHPPTS(0.067)GVEK	3	0.022618
sp|Q5VT52|RPRD2_HUMAN Regulation of nuclear pre-mRNA domain-containing protein 2 OS=Homo sapiens OX=9606 GN=RPRD2 PE=1 SV=1	Q5VT52	503	59.943	T(0.009)PAPAT(0.122)T(0.022)T(0.004)S(0.462)HNPLANILS(0.38)K	3	-0.063274
sp|Q5VT52|RPRD2_HUMAN Regulation of nuclear pre-mRNA domain-containing protein 2 OS=Homo sapiens OX=9606 GN=RPRD2 PE=1 SV=1	Q5VT52	512	93.404	TPAPAT(0.004)T(0.004)TS(0.008)HNPLANILS(0.984)K	3	-0.25502
sp|Q5VTR2|BRE1A_HUMAN E3 ubiquitin-protein ligase BRE1A OS=Homo sapiens OX=9606 GN=RNF20 PE=1 SV=2	Q5VTR2	28	45.79	KAAVEDS(0.993)GT(0.998)T(0.009)VET(0.001)IK	3	-0.022931
sp|Q5VWN6|TASO2_HUMAN Protein TASOR 2 OS=Homo sapiens OX=9606 GN=TASOR2 PE=1 SV=1	Q5VWN6	1097	102.05	HPVS(0.5)TS(0.5)ENAR	2	0.34914
sp|Q5VWN6|TASO2_HUMAN Protein TASOR 2 OS=Homo sapiens OX=9606 GN=TASOR2 PE=1 SV=1	Q5VWN6	1099	102.05	HPVS(0.5)TS(0.5)ENAR	2	0.34914
sp|Q5VWN6|TASO2_HUMAN Protein TASOR 2 OS=Homo sapiens OX=9606 GN=TASOR2 PE=1 SV=1	Q5VWN6	967	84.718	VAS(0.854)YS(0.126)GT(0.02)VTQATFTR	2	-0.049271
sp|Q5VWN6|TASO2_HUMAN Protein TASOR 2 OS=Homo sapiens OX=9606 GN=TASOR2 PE=1 SV=1	Q5VWN6	969	150.34	VAS(0.128)YS(0.844)GT(0.028)VTQATFTR	2	-0.54034
sp|Q68D20|PMS2L_HUMAN Protein PMS2CL OS=Homo sapiens OX=9606 GN=PMS2CL PE=2 SV=1	Q68D20	92	88.092	EAVS(0.002)S(0.002)S(0.961)QGPS(0.036)DPTDRAEVEK	2	-3.8713
sp|Q6IE37|OVOS1_HUMAN Ovostatin homolog 1 OS=Homo sapiens OX=9606 GN=OVOS1 PE=2 SV=2	Q6IE37	714	47.222	NT(0.329)CVEVS(0.671)YIWECLPGK	3	1.8218
sp|Q6KC79|NIPBL_HUMAN Nipped-B-like protein OS=Homo sapiens OX=9606 GN=NIPBL PE=1 SV=2	Q6KC79	139	41.562	LS(0.085)QNS(0.079)MHS(0.092)S(0.092)PAS(0.314)S(0.314)NYQQTTIS(0.002)HS(0.005)PS(0.005)S(0.014)R	4	0.89261
sp|Q6KC79|NIPBL_HUMAN Nipped-B-like protein OS=Homo sapiens OX=9606 GN=NIPBL PE=1 SV=2	Q6KC79	140	41.562	LS(0.085)QNS(0.079)MHS(0.092)S(0.092)PAS(0.314)S(0.314)NYQQTTIS(0.002)HS(0.005)PS(0.005)S(0.014)R	4	0.89261
sp|Q6MZP7|LIN54_HUMAN Protein lin-54 homolog OS=Homo sapiens OX=9606 GN=LIN54 PE=1 SV=3	Q6MZP7	111	93.5	LGAQT(0.108)PVT(0.014)IS(0.878)ANQIILNK	3	-0.099896
sp|Q6MZP7|LIN54_HUMAN Protein lin-54 homolog OS=Homo sapiens OX=9606 GN=LIN54 PE=1 SV=3	Q6MZP7	368	41.784	LVT(0.206)AT(0.206)S(0.206)AS(0.206)S(0.086)S(0.037)T(0.037)QPVS(0.015)QNPS(0.001)TNTQPLQQAK	3	-0.0733
sp|Q6MZP7|LIN54_HUMAN Protein lin-54 homolog OS=Homo sapiens OX=9606 GN=LIN54 PE=1 SV=3	Q6MZP7	370	41.784	LVT(0.206)AT(0.206)S(0.206)AS(0.206)S(0.086)S(0.037)T(0.037)QPVS(0.015)QNPS(0.001)TNTQPLQQAK	3	-0.0733
sp|Q6MZP7|LIN54_HUMAN Protein lin-54 homolog OS=Homo sapiens OX=9606 GN=LIN54 PE=1 SV=3	Q6MZP7	372	54.3	LVT(0.117)AT(0.141)S(0.141)AS(0.141)S(0.141)S(0.159)T(0.159)QPVS(0.001)QNPS(0.001)TNTQPLQQAK	3	-0.25746
sp|Q6MZP7|LIN54_HUMAN Protein lin-54 homolog OS=Homo sapiens OX=9606 GN=LIN54 PE=1 SV=3	Q6MZP7	238	100.82	T(0.005)PT(0.002)S(0.993)GPVITK	2	-0.22568
sp|Q6MZP7|LIN54_HUMAN Protein lin-54 homolog OS=Homo sapiens OX=9606 GN=LIN54 PE=1 SV=3	Q6MZP7	276	76.311	VLS(0.316)QS(0.57)TPGTPS(0.114)K	2	-0.57276
sp|Q6P4R8|NFRKB_HUMAN Nuclear factor related to kappa-B-binding protein OS=Homo sapiens OX=9606 GN=NFRKB PE=1 SV=2	Q6P4R8	1027	61.212	AS(0.377)S(0.313)AS(0.103)APS(0.103)S(0.103)TPTGTTVVK	2	0.33056
sp|Q6P4R8|NFRKB_HUMAN Nuclear factor related to kappa-B-binding protein OS=Homo sapiens OX=9606 GN=NFRKB PE=1 SV=2	Q6P4R8	1028	70.438	AS(0.194)S(0.538)AS(0.164)APS(0.052)S(0.052)TPTGTTVVK	2	0.66695
sp|Q6P4R8|NFRKB_HUMAN Nuclear factor related to kappa-B-binding protein OS=Homo sapiens OX=9606 GN=NFRKB PE=1 SV=2	Q6P4R8	1030	56.746	AS(0.179)S(0.179)AS(0.214)APS(0.214)S(0.214)TPTGTTVVK	2	0.81298
sp|Q6P4R8|NFRKB_HUMAN Nuclear factor related to kappa-B-binding protein OS=Homo sapiens OX=9606 GN=NFRKB PE=1 SV=2	Q6P4R8	1033	56.746	AS(0.179)S(0.179)AS(0.214)APS(0.214)S(0.214)TPTGTTVVK	2	0.81298
sp|Q6P4R8|NFRKB_HUMAN Nuclear factor related to kappa-B-binding protein OS=Homo sapiens OX=9606 GN=NFRKB PE=1 SV=2	Q6P4R8	1034	56.746	AS(0.179)S(0.179)AS(0.214)APS(0.214)S(0.214)TPTGTTVVK	2	0.81298
sp|Q6P4R8|NFRKB_HUMAN Nuclear factor related to kappa-B-binding protein OS=Homo sapiens OX=9606 GN=NFRKB PE=1 SV=2	Q6P4R8	1267	140.28	IQT(0.045)VPAS(0.806)HLQQGTAS(0.069)GS(0.069)S(0.011)K	3	0.27523
sp|Q6P4R8|NFRKB_HUMAN Nuclear factor related to kappa-B-binding protein OS=Homo sapiens OX=9606 GN=NFRKB PE=1 SV=2	Q6P4R8	1275	140.28	IQT(0.003)VPAS(0.086)HLQQGTAS(0.412)GS(0.412)S(0.086)K	3	0.54765
sp|Q6P4R8|NFRKB_HUMAN Nuclear factor related to kappa-B-binding protein OS=Homo sapiens OX=9606 GN=NFRKB PE=1 SV=2	Q6P4R8	1277	140.28	IQT(0.003)VPAS(0.086)HLQQGTAS(0.412)GS(0.412)S(0.086)K	3	0.54765
sp|Q6P4R8|NFRKB_HUMAN Nuclear factor related to kappa-B-binding protein OS=Homo sapiens OX=9606 GN=NFRKB PE=1 SV=2	Q6P4R8	1278	140.28	IQT(0.003)VPAS(0.178)HLQQGTAS(0.273)GS(0.273)S(0.273)K	2	-0.27297
sp|Q6P4R8|NFRKB_HUMAN Nuclear factor related to kappa-B-binding protein OS=Homo sapiens OX=9606 GN=NFRKB PE=1 SV=2	Q6P4R8	1119	43.986	QGAS(0.076)VAS(0.387)GS(0.16)GT(0.106)VHT(0.004)S(0.071)AVS(0.16)LPS(0.018)MNAAVS(0.018)K	3	-0.39857
sp|Q6P4R8|NFRKB_HUMAN Nuclear factor related to kappa-B-binding protein OS=Homo sapiens OX=9606 GN=NFRKB PE=1 SV=2	Q6P4R8	1168	77.726	QVPVS(0.872)T(0.009)TVVS(0.059)TS(0.059)QAGK	2	0.64041
sp|Q6P4R8|NFRKB_HUMAN Nuclear factor related to kappa-B-binding protein OS=Homo sapiens OX=9606 GN=NFRKB PE=1 SV=2	Q6P4R8	1173	77.726	QVPVS(0.333)T(0.001)TVVS(0.333)TS(0.333)QAGK	2	-0.05281
sp|Q6P4R8|NFRKB_HUMAN Nuclear factor related to kappa-B-binding protein OS=Homo sapiens OX=9606 GN=NFRKB PE=1 SV=2	Q6P4R8	1175	77.726	QVPVS(0.333)T(0.001)TVVS(0.333)TS(0.333)QAGK	2	-0.05281
sp|Q6P4R8|NFRKB_HUMAN Nuclear factor related to kappa-B-binding protein OS=Homo sapiens OX=9606 GN=NFRKB PE=1 SV=2	Q6P4R8	746	102.62	S(0.994)GPS(0.003)TVS(0.003)EPAK	2	0.38504
sp|Q6P4R8|NFRKB_HUMAN Nuclear factor related to kappa-B-binding protein OS=Homo sapiens OX=9606 GN=NFRKB PE=1 SV=2	Q6P4R8	1146	85.932	TVAVAS(0.964)GAAS(0.014)T(0.001)PIS(0.009)IS(0.011)TGAPTVR	2	-0.3555
sp|Q6P4R8|NFRKB_HUMAN Nuclear factor related to kappa-B-binding protein OS=Homo sapiens OX=9606 GN=NFRKB PE=1 SV=2	Q6P4R8	1150	103.2	T(0.001)VAVAS(0.042)GAAS(0.534)T(0.009)PIS(0.335)IS(0.079)TGAPTVR	2	0.016366
sp|Q6P4R8|NFRKB_HUMAN Nuclear factor related to kappa-B-binding protein OS=Homo sapiens OX=9606 GN=NFRKB PE=1 SV=2	Q6P4R8	1156	68.972	TVAVAS(0.117)GAAS(0.117)T(0.117)PIS(0.264)IS(0.327)T(0.057)GAPT(0.001)VR	2	-0.43501
sp|Q6PJT7|ZC3HE_HUMAN Zinc finger CCCH domain-containing protein 14 OS=Homo sapiens OX=9606 GN=ZC3H14 PE=1 SV=1	Q6PJT7	360	177.04	AIS(0.973)EAQES(0.027)VTK	2	-0.29991
sp|Q6UN15|FIP1_HUMAN Pre-mRNA 3'-end-processing factor FIP1 OS=Homo sapiens OX=9606 GN=FIP1L1 PE=1 SV=1	Q6UN15	252	80.238	ET(0.034)ALPS(0.966)TK	1	-0.31441
sp|Q6UN15|FIP1_HUMAN Pre-mRNA 3'-end-processing factor FIP1 OS=Homo sapiens OX=9606 GN=FIP1L1 PE=1 SV=1	Q6UN15	206	92.151	MGLEVIPVTS(1)TTNK	2	-0.54386
sp|Q6UWF3|SCIMP_HUMAN SLP adapter and CSK-interacting membrane protein OS=Homo sapiens OX=9606 GN=SCIMP PE=1 SV=1	Q6UWF3	9	50.284	DTFT(0.002)VQDS(0.985)T(0.506)AMS(0.506)WWR	2	0.99875
sp|Q6UWF3|SCIMP_HUMAN SLP adapter and CSK-interacting membrane protein OS=Homo sapiens OX=9606 GN=SCIMP PE=1 SV=1	Q6UWF3	13	50.284	DTFT(0.002)VQDS(0.985)T(0.506)AMS(0.506)WWR	2	0.99875
sp|Q6VMQ6|MCAF1_HUMAN Activating transcription factor 7-interacting protein 1 OS=Homo sapiens OX=9606 GN=ATF7IP PE=1 SV=3	Q6VMQ6	880	59.954	NPT(0.008)AS(0.05)AAPLGT(0.309)T(0.27)LAVQAVPTAHS(0.362)IVQATR	3	0.43939
sp|Q6W2J9|BCOR_HUMAN BCL-6 corepressor OS=Homo sapiens OX=9606 GN=BCOR PE=1 SV=1	Q6W2J9	367	86.136	IS(0.021)T(0.388)S(0.479)PS(0.098)VALS(0.014)KPYMTVSSEFPAAR	3	0.32548
sp|Q6WRI0|IGS10_HUMAN Immunoglobulin superfamily member 10 OS=Homo sapiens OX=9606 GN=IGSF10 PE=1 SV=1	Q6WRI0	732	42.396	RGDS(0.997)T(0.003)HR	1	-3.289
sp|Q6Y7W6|GGYF2_HUMAN GRB10-interacting GYF protein 2 OS=Homo sapiens OX=9606 GN=GIGYF2 PE=1 SV=1	Q6Y7W6	678	81.565	IS(0.114)DQNIIPS(0.875)VT(0.011)R	2	0.65372
sp|Q6ZNM6|SMI10_HUMAN Sperm-associated microtubule inner protein 10 OS=Homo sapiens OX=9606 GN=SPMIP10 PE=1 SV=1	Q6ZNM6	3	49.466	AS(1)GKDT(0.959)CPT(0.041)LPK	3	-2.2374
sp|Q6ZRS2|SRCAP_HUMAN Helicase SRCAP OS=Homo sapiens OX=9606 GN=SRCAP PE=1 SV=3	Q6ZRS2	2416	241.11	AETQGANHTPVIS(1)AHQTR	2	-0.50038
sp|Q6ZTY9|CG065_HUMAN Putative uncharacterized protein LINC02902 OS=Homo sapiens OX=9606 GN=LINC02902 PE=5 SV=1	Q6ZTY9	8	42.001	RMAPT(0.024)ES(0.988)T(0.988)EGR	3	2.3198
sp|Q6ZU80|CE128_HUMAN Centrosomal protein of 128 kDa OS=Homo sapiens OX=9606 GN=CEP128 PE=1 SV=2	Q6ZU80	192	96.668	SRS(1)DAET(1)K	2	2.2515
sp|Q7Z3K3|POGZ_HUMAN Pogo transposable element with ZNF domain OS=Homo sapiens OX=9606 GN=POGZ PE=1 SV=2	Q7Z3K3	289	133.98	LAPS(0.959)FPS(0.03)PPAVS(0.009)IAS(0.003)FVTVK	2	0.61775
sp|Q7Z3K3|POGZ_HUMAN Pogo transposable element with ZNF domain OS=Homo sapiens OX=9606 GN=POGZ PE=1 SV=2	Q7Z3K3	292	133.98	LAPS(0.059)FPS(0.843)PPAVS(0.049)IAS(0.049)FVTVK	3	0.27869
sp|Q7Z3K3|POGZ_HUMAN Pogo transposable element with ZNF domain OS=Homo sapiens OX=9606 GN=POGZ PE=1 SV=2	Q7Z3K3	297	128.59	LAPS(0.083)FPS(0.062)PPAVS(0.427)IAS(0.427)FVTVK	2	0.6028
sp|Q7Z3K3|POGZ_HUMAN Pogo transposable element with ZNF domain OS=Homo sapiens OX=9606 GN=POGZ PE=1 SV=2	Q7Z3K3	300	128.59	LAPS(0.103)FPS(0.103)PPAVS(0.365)IAS(0.43)FVTVK	2	0.098091
sp|Q7Z3K3|POGZ_HUMAN Pogo transposable element with ZNF domain OS=Homo sapiens OX=9606 GN=POGZ PE=1 SV=2	Q7Z3K3	251	46.872	S(0.278)T(0.278)PS(0.088)T(0.088)S(0.088)T(0.032)T(0.032)PT(0.011)AT(0.032)QPT(0.032)S(0.032)LGQLAVQS(0.003)PGQS(0.003)NQTTNPK	3	0.11401
sp|Q7Z3K3|POGZ_HUMAN Pogo transposable element with ZNF domain OS=Homo sapiens OX=9606 GN=POGZ PE=1 SV=2	Q7Z3K3	254	70.98	S(0.008)T(0.008)PS(0.147)T(0.133)S(0.133)T(0.133)T(0.133)PT(0.133)AT(0.12)QPT(0.026)S(0.026)LGQLAVQS(0.001)PGQS(0.001)NQTTNPK	3	0.46433
sp|Q7Z3K3|POGZ_HUMAN Pogo transposable element with ZNF domain OS=Homo sapiens OX=9606 GN=POGZ PE=1 SV=2	Q7Z3K3	256	62.958	S(0.011)T(0.011)PS(0.139)T(0.139)S(0.139)T(0.044)T(0.044)PT(0.044)AT(0.139)QPT(0.139)S(0.139)LGQLAVQS(0.004)PGQS(0.011)NQTTNPK	4	0.49617
sp|Q7Z3K3|POGZ_HUMAN Pogo transposable element with ZNF domain OS=Homo sapiens OX=9606 GN=POGZ PE=1 SV=2	Q7Z3K3	266	58.111	S(0.027)T(0.011)PS(0.025)T(0.025)S(0.025)T(0.064)T(0.059)PT(0.059)AT(0.059)QPT(0.321)S(0.321)LGQLAVQS(0.003)PGQS(0.003)NQTTNPK	3	0.096573
sp|Q7Z3K3|POGZ_HUMAN Pogo transposable element with ZNF domain OS=Homo sapiens OX=9606 GN=POGZ PE=1 SV=2	Q7Z3K3	278	54.184	S(0.019)T(0.018)PS(0.112)T(0.105)S(0.105)T(0.105)T(0.105)PT(0.112)AT(0.112)QPT(0.024)S(0.024)LGQLAVQS(0.022)PGQS(0.136)NQTTNPK	3	-0.38843
sp|Q7Z3K3|POGZ_HUMAN Pogo transposable element with ZNF domain OS=Homo sapiens OX=9606 GN=POGZ PE=1 SV=2	Q7Z3K3	239	162.64	S(0.668)T(0.264)VPQS(0.048)QS(0.02)QQTK	2	0.31738
sp|Q7Z3K3|POGZ_HUMAN Pogo transposable element with ZNF domain OS=Homo sapiens OX=9606 GN=POGZ PE=1 SV=2	Q7Z3K3	244	130.69	S(0.419)T(0.002)VPQS(0.419)QS(0.16)QQTK	2	0.59461
sp|Q7Z3K3|POGZ_HUMAN Pogo transposable element with ZNF domain OS=Homo sapiens OX=9606 GN=POGZ PE=1 SV=2	Q7Z3K3	246	100.04	S(0.198)T(0.104)VPQS(0.349)QS(0.349)QQTK	2	0.25712
sp|Q7Z3K3|POGZ_HUMAN Pogo transposable element with ZNF domain OS=Homo sapiens OX=9606 GN=POGZ PE=1 SV=2	Q7Z3K3	434	69.92	T(0.001)APVAS(0.7)T(0.051)PS(0.052)S(0.052)T(0.011)PIPALS(0.134)PPTK	2	-0.76174
sp|Q7Z3K3|POGZ_HUMAN Pogo transposable element with ZNF domain OS=Homo sapiens OX=9606 GN=POGZ PE=1 SV=2	Q7Z3K3	437	53.905	T(0.008)APVAS(0.182)T(0.047)PS(0.496)S(0.152)T(0.067)PIPALS(0.047)PPTK	3	-0.41734
sp|Q7Z3K3|POGZ_HUMAN Pogo transposable element with ZNF domain OS=Homo sapiens OX=9606 GN=POGZ PE=1 SV=2	Q7Z3K3	438	53.705	T(0.054)APVAS(0.118)T(0.017)PS(0.368)S(0.368)T(0.014)PIPALS(0.061)PPTK	3	-0.32179
sp|Q7Z3K3|POGZ_HUMAN Pogo transposable element with ZNF domain OS=Homo sapiens OX=9606 GN=POGZ PE=1 SV=2	Q7Z3K3	445	46.66	T(0.061)APVAS(0.061)T(0.078)PS(0.192)S(0.099)T(0.027)PIPALS(0.482)PPTK	3	-0.2909
sp|Q7Z3K3|POGZ_HUMAN Pogo transposable element with ZNF domain OS=Homo sapiens OX=9606 GN=POGZ PE=1 SV=2	Q7Z3K3	720	57.427	T(0.08)VPVS(0.015)S(0.015)NDT(0.041)PPS(0.035)ALQEAAPLT(0.348)S(0.348)S(0.118)MDPLPVFLYPPVQR	3	0.04163
sp|Q7Z3K3|POGZ_HUMAN Pogo transposable element with ZNF domain OS=Homo sapiens OX=9606 GN=POGZ PE=1 SV=2	Q7Z3K3	721	57.427	T(0.002)VPVS(0.011)S(0.011)NDT(0.01)PPS(0.011)ALQEAAPLT(0.286)S(0.317)S(0.352)MDPLPVFLYPPVQR	4	0.17701
sp|Q7Z417|NUFP2_HUMAN FMR1-interacting protein NUFIP2 OS=Homo sapiens OX=9606 GN=NUFIP2 PE=1 SV=1	Q7Z417	373	128.79	T(0.011)IQNS(0.355)S(0.284)VS(0.05)PT(0.046)S(0.05)S(0.063)S(0.063)S(0.016)S(0.006)S(0.006)S(0.006)S(0.006)TGETQTQS(0.012)S(0.012)S(0.012)R	3	0.17831
sp|Q7Z417|NUFP2_HUMAN FMR1-interacting protein NUFIP2 OS=Homo sapiens OX=9606 GN=NUFIP2 PE=1 SV=1	Q7Z417	374	174.87	T(0.026)IQNS(0.206)S(0.53)VS(0.138)PT(0.037)S(0.037)S(0.012)S(0.001)S(0.002)S(0.002)S(0.001)S(0.001)S(0.001)TGETQTQS(0.001)S(0.001)S(0.001)R	3	-0.77936
sp|Q7Z417|NUFP2_HUMAN FMR1-interacting protein NUFIP2 OS=Homo sapiens OX=9606 GN=NUFIP2 PE=1 SV=1	Q7Z417	376	130.77	T(0.001)IQNS(0.053)S(0.042)VS(0.787)PT(0.038)S(0.038)S(0.01)S(0.009)S(0.008)S(0.008)S(0.001)S(0.001)S(0.001)TGETQTQS(0.001)S(0.001)S(0.001)R	3	-0.15238
sp|Q7Z417|NUFP2_HUMAN FMR1-interacting protein NUFIP2 OS=Homo sapiens OX=9606 GN=NUFIP2 PE=1 SV=1	Q7Z417	379	100.46	TIQNS(0.011)S(0.186)VS(0.186)PT(0.186)S(0.186)S(0.058)S(0.019)S(0.001)SSSSTGETQTQS(0.055)S(0.055)S(0.055)R	2	-1.2829
sp|Q7Z417|NUFP2_HUMAN FMR1-interacting protein NUFIP2 OS=Homo sapiens OX=9606 GN=NUFIP2 PE=1 SV=1	Q7Z417	380	84.035	T(0.001)IQNS(0.032)S(0.174)VS(0.141)PT(0.141)S(0.174)S(0.217)S(0.039)S(0.01)S(0.01)S(0.01)S(0.01)S(0.012)TGETQTQS(0.01)S(0.01)S(0.01)R	3	-0.21658
sp|Q7Z417|NUFP2_HUMAN FMR1-interacting protein NUFIP2 OS=Homo sapiens OX=9606 GN=NUFIP2 PE=1 SV=1	Q7Z417	383	78.516	T(0.003)IQNS(0.008)S(0.008)VS(0.008)PT(0.071)S(0.071)S(0.071)S(0.086)S(0.103)S(0.313)S(0.103)S(0.023)S(0.023)T(0.001)GETQTQS(0.035)S(0.035)S(0.035)R	3	0.62637
sp|Q7Z417|NUFP2_HUMAN FMR1-interacting protein NUFIP2 OS=Homo sapiens OX=9606 GN=NUFIP2 PE=1 SV=1	Q7Z417	384	78.516	T(0.001)IQNS(0.01)S(0.058)VS(0.058)PT(0.072)S(0.072)S(0.072)S(0.09)S(0.113)S(0.142)S(0.142)S(0.142)S(0.013)T(0.001)GETQTQS(0.004)S(0.004)S(0.004)R	2	-0.43472
sp|Q7Z417|NUFP2_HUMAN FMR1-interacting protein NUFIP2 OS=Homo sapiens OX=9606 GN=NUFIP2 PE=1 SV=1	Q7Z417	385	78.516	T(0.001)IQNS(0.01)S(0.058)VS(0.058)PT(0.072)S(0.072)S(0.072)S(0.09)S(0.113)S(0.142)S(0.142)S(0.142)S(0.013)T(0.001)GETQTQS(0.004)S(0.004)S(0.004)R	2	-0.43472
sp|Q7Z417|NUFP2_HUMAN FMR1-interacting protein NUFIP2 OS=Homo sapiens OX=9606 GN=NUFIP2 PE=1 SV=1	Q7Z417	394	57.509	T(0.006)IQNS(0.014)S(0.014)VS(0.014)PT(0.051)S(0.054)S(0.054)S(0.054)S(0.054)S(0.054)S(0.054)S(0.054)S(0.054)TGETQTQS(0.155)S(0.155)S(0.155)R	3	-1.3205
sp|Q7Z417|NUFP2_HUMAN FMR1-interacting protein NUFIP2 OS=Homo sapiens OX=9606 GN=NUFIP2 PE=1 SV=1	Q7Z417	395	57.509	T(0.006)IQNS(0.014)S(0.014)VS(0.014)PT(0.051)S(0.054)S(0.054)S(0.054)S(0.054)S(0.054)S(0.054)S(0.054)S(0.054)TGETQTQS(0.155)S(0.155)S(0.155)R	3	-1.3205
sp|Q7Z417|NUFP2_HUMAN FMR1-interacting protein NUFIP2 OS=Homo sapiens OX=9606 GN=NUFIP2 PE=1 SV=1	Q7Z417	396	57.509	T(0.006)IQNS(0.014)S(0.014)VS(0.014)PT(0.051)S(0.054)S(0.054)S(0.054)S(0.054)S(0.054)S(0.054)S(0.054)S(0.054)TGETQTQS(0.155)S(0.155)S(0.155)R	3	-1.3205
sp|Q7Z589|EMSY_HUMAN BRCA2-interacting transcriptional repressor EMSY OS=Homo sapiens OX=9606 GN=EMSY PE=1 SV=2	Q7Z589	228	107.01	AVVPVS(1)K	2	0.068659
sp|Q7Z589|EMSY_HUMAN BRCA2-interacting transcriptional repressor EMSY OS=Homo sapiens OX=9606 GN=EMSY PE=1 SV=2	Q7Z589	556	140.33	IIS(0.333)S(0.333)NIVS(0.333)GTTTK	2	0.13375
sp|Q7Z589|EMSY_HUMAN BRCA2-interacting transcriptional repressor EMSY OS=Homo sapiens OX=9606 GN=EMSY PE=1 SV=2	Q7Z589	557	140.33	IIS(0.333)S(0.333)NIVS(0.333)GTTTK	2	0.13375
sp|Q7Z589|EMSY_HUMAN BRCA2-interacting transcriptional repressor EMSY OS=Homo sapiens OX=9606 GN=EMSY PE=1 SV=2	Q7Z589	561	140.33	IIS(0.329)S(0.296)NIVS(0.374)GTTTK	2	0.39116
sp|Q7Z589|EMSY_HUMAN BRCA2-interacting transcriptional repressor EMSY OS=Homo sapiens OX=9606 GN=EMSY PE=1 SV=2	Q7Z589	267	67.648	IT(0.002)FT(0.227)KPS(0.739)T(0.009)QT(0.009)T(0.009)NT(0.003)T(0.001)T(0.001)QK	2	-0.15407
sp|Q7Z589|EMSY_HUMAN BRCA2-interacting transcriptional repressor EMSY OS=Homo sapiens OX=9606 GN=EMSY PE=1 SV=2	Q7Z589	1090	180.1	QT(0.011)AS(0.836)QVEQPIIT(0.001)QGS(0.076)S(0.076)VTK	2	-0.78584
sp|Q7Z589|EMSY_HUMAN BRCA2-interacting transcriptional repressor EMSY OS=Homo sapiens OX=9606 GN=EMSY PE=1 SV=2	Q7Z589	1101	96.096	QTAS(0.143)QVEQPIIT(0.004)QGS(0.423)S(0.423)VT(0.007)K	2	-0.23872
sp|Q7Z589|EMSY_HUMAN BRCA2-interacting transcriptional repressor EMSY OS=Homo sapiens OX=9606 GN=EMSY PE=1 SV=2	Q7Z589	1102	96.096	QTAS(0.383)QVEQPIITQGS(0.027)S(0.59)VTK	2	-1.8288
sp|Q7Z589|EMSY_HUMAN BRCA2-interacting transcriptional repressor EMSY OS=Homo sapiens OX=9606 GN=EMSY PE=1 SV=2	Q7Z589	236	89.561	TITVPVS(0.856)GS(0.143)PK	2	-0.44123
sp|Q7Z589|EMSY_HUMAN BRCA2-interacting transcriptional repressor EMSY OS=Homo sapiens OX=9606 GN=EMSY PE=1 SV=2	Q7Z589	238	86.014	TITVPVS(0.5)GS(0.5)PK	2	-0.2428
sp|Q7Z589|EMSY_HUMAN BRCA2-interacting transcriptional repressor EMSY OS=Homo sapiens OX=9606 GN=EMSY PE=1 SV=2	Q7Z589	536	95.094	T(0.007)T(0.007)S(0.493)GS(0.493)IITVVPK	2	0.23542
sp|Q7Z589|EMSY_HUMAN BRCA2-interacting transcriptional repressor EMSY OS=Homo sapiens OX=9606 GN=EMSY PE=1 SV=2	Q7Z589	538	95.094	T(0.007)T(0.007)S(0.493)GS(0.493)IITVVPK	2	0.23542
sp|Q7Z589|EMSY_HUMAN BRCA2-interacting transcriptional repressor EMSY OS=Homo sapiens OX=9606 GN=EMSY PE=1 SV=2	Q7Z589	284	78.763	VIIVT(0.555)T(0.555)S(0.604)PS(0.109)S(0.107)T(0.01)FVPNILS(0.061)K	2	1.0759
sp|Q7Z589|EMSY_HUMAN BRCA2-interacting transcriptional repressor EMSY OS=Homo sapiens OX=9606 GN=EMSY PE=1 SV=2	Q7Z589	286	44.632	VIIVT(0.802)T(0.26)S(0.271)PS(0.294)S(0.293)T(0.007)FVPNILS(0.073)K	3	-0.32724
sp|Q7Z589|EMSY_HUMAN BRCA2-interacting transcriptional repressor EMSY OS=Homo sapiens OX=9606 GN=EMSY PE=1 SV=2	Q7Z589	287	44.632	VIIVT(0.802)T(0.26)S(0.271)PS(0.294)S(0.293)T(0.007)FVPNILS(0.073)K	3	-0.32724
sp|Q7Z5L2|R3HCL_HUMAN Coiled-coil domain-containing protein R3HCC1L OS=Homo sapiens OX=9606 GN=R3HCC1L PE=1 SV=3	Q7Z5L2	55	98.458	QKES(0.198)S(0.787)LS(0.015)QK	2	-1.1927
sp|Q86WI3|NLRC5_HUMAN Protein NLRC5 OS=Homo sapiens OX=9606 GN=NLRC5 PE=1 SV=3	Q86WI3	934	45.723	AVS(0.001)ACWT(0.002)LAELHIS(0.997)LQHK	3	-0.49017
sp|Q86YP4|P66A_HUMAN Transcriptional repressor p66-alpha OS=Homo sapiens OX=9606 GN=GATAD2A PE=1 SV=1	Q86YP4	321	104.61	GT(0.029)T(0.025)AT(0.025)S(0.511)AQANS(0.122)T(0.133)PT(0.03)S(0.03)VAS(0.007)VVTS(0.035)AES(0.029)PAS(0.024)R	2	-0.55914
sp|Q86YP4|P66A_HUMAN Transcriptional repressor p66-alpha OS=Homo sapiens OX=9606 GN=GATAD2A PE=1 SV=1	Q86YP4	326	130.02	GT(0.003)T(0.005)AT(0.001)S(0.027)AQANS(0.438)T(0.438)PT(0.014)S(0.029)VAS(0.005)VVTS(0.017)AES(0.012)PAS(0.012)R	2	-0.25198
sp|Q86YP4|P66A_HUMAN Transcriptional repressor p66-alpha OS=Homo sapiens OX=9606 GN=GATAD2A PE=1 SV=1	Q86YP4	330	99.148	GT(0.012)T(0.009)AT(0.009)S(0.009)AQANS(0.026)T(0.096)PT(0.047)S(0.183)VAS(0.183)VVTS(0.183)AES(0.122)PAS(0.122)R	2	1.1469
sp|Q86YP4|P66A_HUMAN Transcriptional repressor p66-alpha OS=Homo sapiens OX=9606 GN=GATAD2A PE=1 SV=1	Q86YP4	333	99.148	GT(0.012)T(0.009)AT(0.009)S(0.009)AQANS(0.026)T(0.096)PT(0.047)S(0.183)VAS(0.183)VVTS(0.183)AES(0.122)PAS(0.122)R	2	1.1469
sp|Q86YP4|P66A_HUMAN Transcriptional repressor p66-alpha OS=Homo sapiens OX=9606 GN=GATAD2A PE=1 SV=1	Q86YP4	337	99.148	GT(0.011)T(0.01)AT(0.03)S(0.066)AQANS(0.066)T(0.006)PT(0.001)S(0.066)VAS(0.056)VVTS(0.255)AES(0.216)PAS(0.216)R	3	-0.46015
sp|Q86YP4|P66A_HUMAN Transcriptional repressor p66-alpha OS=Homo sapiens OX=9606 GN=GATAD2A PE=1 SV=1	Q86YP4	340	60.194	GT(0.003)T(0.003)AT(0.01)S(0.01)AQANS(0.004)T(0.002)PT(0.019)S(0.04)VAS(0.12)VVT(0.003)S(0.12)AES(0.366)PAS(0.299)R	3	-0.61279
sp|Q86YP4|P66A_HUMAN Transcriptional repressor p66-alpha OS=Homo sapiens OX=9606 GN=GATAD2A PE=1 SV=1	Q86YP4	589	62.005	T(0.028)PLS(0.489)T(0.004)GGTLAFVS(0.132)PS(0.347)LAVHK	3	0.8054
sp|Q86YT5|S13A5_HUMAN Na(+)/citrate cotransporter OS=Homo sapiens OX=9606 GN=SLC13A5 PE=1 SV=1	Q86YT5	6	42.243	AS(0.042)ALS(0.985)YVS(0.973)K	2	0.36436
sp|Q86YT5|S13A5_HUMAN Na(+)/citrate cotransporter OS=Homo sapiens OX=9606 GN=SLC13A5 PE=1 SV=1	Q86YT5	9	42.243	AS(0.042)ALS(0.985)YVS(0.973)K	2	0.36436
sp|Q8IV20|LACC1_HUMAN Purine nucleoside phosphorylase LACC1 OS=Homo sapiens OX=9606 GN=LACC1 PE=1 SV=1	Q8IV20	16	49.223	MAEAVLIDLFGLKLNS(1)QK	2	4.1583
sp|Q8IVH2|FOXP4_HUMAN Forkhead box protein P4 OS=Homo sapiens OX=9606 GN=FOXP4 PE=1 SV=1	Q8IVH2	273	52.045	VS(0.041)PPLS(0.902)HHT(0.033)LPNGQPT(0.054)VLT(0.052)S(0.919)R	3	2.5351
sp|Q8IVH2|FOXP4_HUMAN Forkhead box protein P4 OS=Homo sapiens OX=9606 GN=FOXP4 PE=1 SV=1	Q8IVH2	287	52.045	VS(0.041)PPLS(0.902)HHT(0.033)LPNGQPT(0.054)VLT(0.052)S(0.919)R	3	2.5351
sp|Q8IVV2|LOXH1_HUMAN Lipoxygenase homology domain-containing protein 1 OS=Homo sapiens OX=9606 GN=LOXHD1 PE=2 SV=4	Q8IVV2	1186	43.794	IGHNNT(1)GMNPGWHCS(1)HVDIRR	2	-1.3394
sp|Q8IVW6|ARI3B_HUMAN AT-rich interactive domain-containing protein 3B OS=Homo sapiens OX=9606 GN=ARID3B PE=1 SV=2	Q8IVW6	411	106.55	LAVPVTLAS(1)QQAGTR	2	-0.27984
sp|Q8IWI9|MGAP_HUMAN MAX gene-associated protein OS=Homo sapiens OX=9606 GN=MGA PE=1 SV=4	Q8IWI9	1557	115.83	IPGVS(1)TPQTLAGTQK	2	0.83779
sp|Q8IWI9|MGAP_HUMAN MAX gene-associated protein OS=Homo sapiens OX=9606 GN=MGA PE=1 SV=4	Q8IWI9	1905	104.42	IS(0.998)PPEPQS(0.001)FAS(0.001)K	2	0.029638
sp|Q8IWI9|MGAP_HUMAN MAX gene-associated protein OS=Homo sapiens OX=9606 GN=MGA PE=1 SV=4	Q8IWI9	1911	91.202	IS(0.053)PPEPQS(0.473)FAS(0.473)K	2	0.34747
sp|Q8IWI9|MGAP_HUMAN MAX gene-associated protein OS=Homo sapiens OX=9606 GN=MGA PE=1 SV=4	Q8IWI9	1914	91.202	IS(0.053)PPEPQS(0.473)FAS(0.473)K	2	0.34747
sp|Q8IWI9|MGAP_HUMAN MAX gene-associated protein OS=Homo sapiens OX=9606 GN=MGA PE=1 SV=4	Q8IWI9	1672	76.156	T(0.005)T(0.005)GIT(0.001)T(0.001)PVAS(0.986)VAFPK	2	0.19653
sp|Q8IWU9|TPH2_HUMAN Tryptophan 5-hydroxylase 2 OS=Homo sapiens OX=9606 GN=TPH2 PE=1 SV=1	Q8IWU9	61	41.029	REAAT(0.098)ES(0.902)GK	1	0.97973
sp|Q8IWZ8|SUGP1_HUMAN SURP and G-patch domain-containing protein 1 OS=Homo sapiens OX=9606 GN=SUGP1 PE=1 SV=2	Q8IWZ8	102	137.17	AQT(0.11)S(0.615)T(0.208)DAPT(0.023)S(0.023)APS(0.008)APPS(0.008)TPTPS(0.006)AGK	2	-0.63838
sp|Q8IWZ8|SUGP1_HUMAN SURP and G-patch domain-containing protein 1 OS=Homo sapiens OX=9606 GN=SUGP1 PE=1 SV=2	Q8IWZ8	115	58.516	AQT(0.092)S(0.092)T(0.092)DAPT(0.115)S(0.115)APS(0.078)APPS(0.209)TPTPS(0.209)AGK	2	-0.40891
sp|Q8IWZ8|SUGP1_HUMAN SURP and G-patch domain-containing protein 1 OS=Homo sapiens OX=9606 GN=SUGP1 PE=1 SV=2	Q8IWZ8	120	119.18	AQT(0.039)S(0.134)T(0.134)DAPT(0.041)S(0.16)APS(0.095)APPS(0.095)TPTPS(0.301)AGK	2	0.33505
sp|Q8IY82|DRC7_HUMAN Dynein regulatory complex subunit 7 OS=Homo sapiens OX=9606 GN=DRC7 PE=1 SV=3	Q8IY82	580	58.978	KLTLS(0.293)S(0.293)AES(0.413)NPR	2	2.2338
sp|Q8IYA8|IHO1_HUMAN Interactor of HORMAD1 protein 1 OS=Homo sapiens OX=9606 GN=IHO1 PE=1 SV=2	Q8IYA8	13	53.211	EMLS(0.987)IPS(0.023)GS(0.99)GNK	4	0.41349
sp|Q8IYA8|IHO1_HUMAN Interactor of HORMAD1 protein 1 OS=Homo sapiens OX=9606 GN=IHO1 PE=1 SV=2	Q8IYA8	18	53.211	EMLS(0.987)IPS(0.023)GS(0.99)GNK	4	0.41349
sp|Q8IZ21|PHAR4_HUMAN Phosphatase and actin regulator 4 OS=Homo sapiens OX=9606 GN=PHACTR4 PE=1 SV=1	Q8IZ21	228	44.31	FIIS(0.011)T(0.03)S(0.028)IT(0.088)T(0.088)APAAT(0.32)T(0.32)AAT(0.095)S(0.015)LAKT(0.009)VNLS(0.07)VT(0.213)PS(0.713)PAPR	3	-0.26485
sp|Q8IZL8|PELP1_HUMAN Proline-, glutamic acid- and leucine-rich protein 1 OS=Homo sapiens OX=9606 GN=PELP1 PE=1 SV=2	Q8IZL8	718	46.2	PGPPT(0.03)T(0.094)ANHLGLS(0.045)VPGLVS(0.831)VPPR	3	-0.58976
sp|Q8N1F7|NUP93_HUMAN Nuclear pore complex protein Nup93 OS=Homo sapiens OX=9606 GN=NUP93 PE=1 SV=2	Q8N1F7	52	113.69	T(0.002)S(0.998)QETADVK	2	0.78375
sp|Q8N2M4|TM86A_HUMAN Lysoplasmalogenase TMEM86A OS=Homo sapiens OX=9606 GN=TMEM86A PE=1 SV=1	Q8N2M4	3	43.512	MVS(0.923)PVT(0.336)VVKS(0.741)EGPK	2	3.257
sp|Q8N2M4|TM86A_HUMAN Lysoplasmalogenase TMEM86A OS=Homo sapiens OX=9606 GN=TMEM86A PE=1 SV=1	Q8N2M4	10	43.512	MVS(0.923)PVT(0.336)VVKS(0.741)EGPK	2	3.257
sp|Q8N309|LRC43_HUMAN Leucine-rich repeat-containing protein 43 OS=Homo sapiens OX=9606 GN=LRRC43 PE=2 SV=2	Q8N309	28	40.819	EASYESESESESEAGPGT(0.008)QRPGT(0.33)GT(0.33)VS(0.33)AAVR	3	3.8989
sp|Q8N3P4|VPS8_HUMAN Vacuolar protein sorting-associated protein 8 homolog OS=Homo sapiens OX=9606 GN=VPS8 PE=1 SV=3	Q8N3P4	1179	45.862	S(0.325)LT(0.308)MQVLNS(0.452)MAAFIALPS(0.914)ILQRILQDPVYGK	3	0.72396
sp|Q8N3P4|VPS8_HUMAN Vacuolar protein sorting-associated protein 8 homolog OS=Homo sapiens OX=9606 GN=VPS8 PE=1 SV=3	Q8N3P4	1188	45.862	S(0.325)LT(0.308)MQVLNS(0.452)MAAFIALPS(0.914)ILQRILQDPVYGK	3	0.72396
sp|Q8N3X1|FNBP4_HUMAN Formin-binding protein 4 OS=Homo sapiens OX=9606 GN=FNBP4 PE=1 SV=3	Q8N3X1	797	141.1	AT(0.003)EIS(0.997)TAVVQR	2	0.17512
sp|Q8N8Q3|ENDOV_HUMAN Endonuclease V OS=Homo sapiens OX=9606 GN=ENDOV PE=1 SV=1	Q8N8Q3	54	61.353	VGGVDVS(1)FVKGDS(1)VR	2	-3.4352
sp|Q8N8Q3|ENDOV_HUMAN Endonuclease V OS=Homo sapiens OX=9606 GN=ENDOV PE=1 SV=1	Q8N8Q3	60	61.353	VGGVDVS(1)FVKGDS(1)VR	2	-3.4352
sp|Q8N8U2|CDYL2_HUMAN Chromodomain Y-like protein 2 OS=Homo sapiens OX=9606 GN=CDYL2 PE=1 SV=2	Q8N8U2	3	47.639	AS(1)GDLYEVERIVDK	3	-3.4501
sp|Q8N983|RM43_HUMAN Large ribosomal subunit protein mL43 OS=Homo sapiens OX=9606 GN=MRPL43 PE=1 SV=1	Q8N983	30	44.611	LS(0.993)FS(0.233)VS(0.774)R	1	-1.2232
sp|Q8N983|RM43_HUMAN Large ribosomal subunit protein mL43 OS=Homo sapiens OX=9606 GN=MRPL43 PE=1 SV=1	Q8N983	34	44.611	LS(0.993)FS(0.233)VS(0.774)R	1	-1.2232
sp|Q8N9V7|TOPZ1_HUMAN Protein TOPAZ1 OS=Homo sapiens OX=9606 GN=TOPAZ1 PE=2 SV=3	Q8N9V7	1190	67.299	EVFQIVNLS(1)IMVKMLPSLK	3	2.8663
sp|Q8N9W5|DAAF3_HUMAN Dynein axonemal assembly factor 3 OS=Homo sapiens OX=9606 GN=DNAAF3 PE=1 SV=4	Q8N9W5	187	42.718	GPQAFPMS(1)R	1	1.0602
sp|Q8NBI6|XXLT1_HUMAN Xyloside xylosyltransferase 1 OS=Homo sapiens OX=9606 GN=XXYLT1 PE=1 SV=1	Q8NBI6	67	60.968	AGAPAAPS(1)PPALELAR	2	1.0294
sp|Q8NBS9|TXND5_HUMAN Thioredoxin domain-containing protein 5 OS=Homo sapiens OX=9606 GN=TXNDC5 PE=1 SV=2	Q8NBS9	183	79.494	DFQTLENWMLQT(0.254)LNEEPVT(0.162)PEPEVEPPS(0.584)APELK	3	1.2859
sp|Q8NBS9|TXND5_HUMAN Thioredoxin domain-containing protein 5 OS=Homo sapiens OX=9606 GN=TXNDC5 PE=1 SV=2	Q8NBS9	308	85.737	T(0.005)ET(0.004)GAT(0.052)ET(0.106)VT(0.004)PS(0.829)EAPVLAAEPEADK	2	0.65647
sp|Q8ND56|LS14A_HUMAN Protein LSM14 homolog A OS=Homo sapiens OX=9606 GN=LSM14A PE=1 SV=3	Q8ND56	10	50.292	S(0.002)GGTPYIGS(0.998)K	3	-2.1767
sp|Q8ND83|SLAI1_HUMAN SLAIN motif-containing protein 1 OS=Homo sapiens OX=9606 GN=SLAIN1 PE=1 SV=3	Q8ND83	412	109.22	MPS(0.822)T(0.053)T(0.003)AIS(0.031)S(0.031)NIS(0.031)S(0.031)PVTVR	2	0.77598
sp|Q8ND83|SLAI1_HUMAN SLAIN motif-containing protein 1 OS=Homo sapiens OX=9606 GN=SLAIN1 PE=1 SV=3	Q8ND83	422	69.922	MPS(0.023)T(0.027)T(0.004)AIS(0.023)S(0.023)NIS(0.13)S(0.77)PVTVR	3	-2.1668
sp|Q8NDV7|TNR6A_HUMAN Trinucleotide repeat-containing gene 6A protein OS=Homo sapiens OX=9606 GN=TNRC6A PE=1 SV=2	Q8NDV7	581	46.66	GGGVWES(0.008)GAANS(0.392)QS(0.399)T(0.465)S(0.407)WGS(0.052)GNGANS(0.146)GGS(0.131)RR	3	2.6984
sp|Q8NDV7|TNR6A_HUMAN Trinucleotide repeat-containing gene 6A protein OS=Homo sapiens OX=9606 GN=TNRC6A PE=1 SV=2	Q8NDV7	583	46.66	GGGVWES(0.008)GAANS(0.392)QS(0.399)T(0.465)S(0.407)WGS(0.052)GNGANS(0.146)GGS(0.131)RR	3	2.6984
sp|Q8NDV7|TNR6A_HUMAN Trinucleotide repeat-containing gene 6A protein OS=Homo sapiens OX=9606 GN=TNRC6A PE=1 SV=2	Q8NDV7	585	46.66	GGGVWES(0.008)GAANS(0.392)QS(0.399)T(0.465)S(0.407)WGS(0.052)GNGANS(0.146)GGS(0.131)RR	3	2.6984
sp|Q8NDX5|PHC3_HUMAN Polyhomeotic-like protein 3 OS=Homo sapiens OX=9606 GN=PHC3 PE=1 SV=1	Q8NDX5	238	84.297	S(0.16)T(0.16)S(0.571)QT(0.004)QS(0.106)LTICHNK	3	0.1037
sp|Q8NFD5|ARI1B_HUMAN AT-rich interactive domain-containing protein 1B OS=Homo sapiens OX=9606 GN=ARID1B PE=1 SV=3	Q8NFD5	1660	84.208	VMPT(0.016)VPT(0.001)S(0.981)QVT(0.002)GPPPQPPPIR	2	-0.22918
sp|Q8NFH5|NUP35_HUMAN Nucleoporin NUP35 OS=Homo sapiens OX=9606 GN=NUP35 PE=1 SV=1	Q8NFH5	298	78.324	AS(0.229)T(0.03)S(0.371)DYQVIS(0.371)DR	2	-0.45713
sp|Q8NFH5|NUP35_HUMAN Nucleoporin NUP35 OS=Homo sapiens OX=9606 GN=NUP35 PE=1 SV=1	Q8NFH5	304	78.324	AS(0.229)T(0.03)S(0.371)DYQVIS(0.371)DR	2	-0.45713
sp|Q8NFU7|TET1_HUMAN Methylcytosine dioxygenase TET1 OS=Homo sapiens OX=9606 GN=TET1 PE=1 SV=2	Q8NFU7	506	50.498	QVHIS(0.53)FLPANT(0.47)QGFPLAPER	3	-0.90869
sp|Q8NGI3|O56B1_HUMAN Olfactory receptor 56B1 OS=Homo sapiens OX=9606 GN=OR56B1 PE=2 SV=2	Q8NGI3	5	51.335	NHMS(1)AS(1)LK	2	-1.2711
sp|Q8NGI3|O56B1_HUMAN Olfactory receptor 56B1 OS=Homo sapiens OX=9606 GN=OR56B1 PE=2 SV=2	Q8NGI3	7	51.335	NHMS(1)AS(1)LK	2	-1.2711
sp|Q8TCU4|ALMS1_HUMAN Centrosome-associated protein ALMS1 OS=Homo sapiens OX=9606 GN=ALMS1 PE=1 SV=4	Q8TCU4	1503	69.523	VS(0.643)VAPGPVGQT(0.147)T(0.05)GAPT(0.005)IT(0.001)S(0.031)PS(0.031)YS(0.094)QHR	3	0.14406
sp|Q8WUX1|S38A5_HUMAN Sodium-coupled neutral amino acid transporter 5 OS=Homo sapiens OX=9606 GN=SLC38A5 PE=1 SV=1	Q8WUX1	148	43.884	S(0.994)ELPLVIGT(0.006)FLYMDPEGDWFLK	3	-0.69072
sp|Q8WV93|AFG1L_HUMAN AFG1-like ATPase OS=Homo sapiens OX=9606 GN=AFG1L PE=1 SV=2	Q8WV93	4	59.35	AAS(0.495)WS(0.495)LLVT(0.01)LR	2	0.40935
sp|Q8WV93|AFG1L_HUMAN AFG1-like ATPase OS=Homo sapiens OX=9606 GN=AFG1L PE=1 SV=2	Q8WV93	6	59.35	AAS(0.495)WS(0.495)LLVT(0.01)LR	2	0.40935
sp|Q8WWH4|ASZ1_HUMAN Ankyrin repeat, SAM and basic leucine zipper domain-containing protein 1 OS=Homo sapiens OX=9606 GN=ASZ1 PE=1 SV=1	Q8WWH4	271	40.104	DHIFS(0.335)S(0.335)YT(0.335)AFGDLEVFLHGLGLEHMT(0.996)DLLK	4	0.92034
sp|Q8WWH4|ASZ1_HUMAN Ankyrin repeat, SAM and basic leucine zipper domain-containing protein 1 OS=Homo sapiens OX=9606 GN=ASZ1 PE=1 SV=1	Q8WWH4	272	40.104	DHIFS(0.335)S(0.335)YT(0.335)AFGDLEVFLHGLGLEHMT(0.996)DLLK	4	0.92034
sp|Q8WWM7|ATX2L_HUMAN Ataxin-2-like protein OS=Homo sapiens OX=9606 GN=ATXN2L PE=1 SV=2	Q8WWM7	684	91.313	S(0.004)T(0.001)S(0.155)T(0.001)PT(0.006)S(0.833)PGPR	2	-0.32485
sp|Q8WWW8|GAB3_HUMAN GRB2-associated-binding protein 3 OS=Homo sapiens OX=9606 GN=GAB3 PE=1 SV=1	Q8WWW8	346	57.96	RISLS(1)GLDNMR	2	0.79552
sp|Q8WXI7|MUC16_HUMAN Mucin-16 OS=Homo sapiens OX=9606 GN=MUC16 PE=1 SV=3	Q8WXI7	2842	62.287	LT(0.07)AT(0.192)QS(0.976)T(0.762)APKGIPVK	2	0.51095
sp|Q8WXI7|MUC16_HUMAN Mucin-16 OS=Homo sapiens OX=9606 GN=MUC16 PE=1 SV=3	Q8WXI7	7827	72.096	RIQTELAS(0.511)S(0.978)LT(0.511)PGLR	2	2.1831
sp|Q8WXI7|MUC16_HUMAN Mucin-16 OS=Homo sapiens OX=9606 GN=MUC16 PE=1 SV=3	Q8WXI7	7828	72.096	RIQTELAS(0.511)S(0.978)LT(0.511)PGLR	2	2.1831
sp|Q8WXI9|P66B_HUMAN Transcriptional repressor p66-beta OS=Homo sapiens OX=9606 GN=GATAD2B PE=1 SV=1	Q8WXI9	486	54.09	LQQQAALS(0.715)PT(0.041)T(0.002)APAVS(0.06)S(0.091)VS(0.091)K	2	-0.55165
sp|Q8WXI9|P66B_HUMAN Transcriptional repressor p66-beta OS=Homo sapiens OX=9606 GN=GATAD2B PE=1 SV=1	Q8WXI9	313	47.089	T(0.249)T(0.249)S(0.249)S(0.249)AIYMNLAS(0.002)HIQPGTVNR	3	-0.19909
sp|Q8WXI9|P66B_HUMAN Transcriptional repressor p66-beta OS=Homo sapiens OX=9606 GN=GATAD2B PE=1 SV=1	Q8WXI9	314	47.089	T(0.249)T(0.249)S(0.249)S(0.249)AIYMNLAS(0.002)HIQPGTVNR	3	-0.19909
sp|Q8WXI9|P66B_HUMAN Transcriptional repressor p66-beta OS=Homo sapiens OX=9606 GN=GATAD2B PE=1 SV=1	Q8WXI9	302	51.296	T(0.105)T(0.105)T(0.098)PNMNPAINYQPQS(0.178)S(0.178)S(0.178)S(0.158)VPCQR	3	-0.21279
sp|Q8WXI9|P66B_HUMAN Transcriptional repressor p66-beta OS=Homo sapiens OX=9606 GN=GATAD2B PE=1 SV=1	Q8WXI9	303	51.296	T(0.105)T(0.105)T(0.098)PNMNPAINYQPQS(0.178)S(0.178)S(0.178)S(0.158)VPCQR	3	-0.21279
sp|Q8WXI9|P66B_HUMAN Transcriptional repressor p66-beta OS=Homo sapiens OX=9606 GN=GATAD2B PE=1 SV=1	Q8WXI9	304	51.296	T(0.105)T(0.105)T(0.098)PNMNPAINYQPQS(0.178)S(0.178)S(0.178)S(0.158)VPCQR	3	-0.21279
sp|Q8WYP5|ELYS_HUMAN Protein ELYS OS=Homo sapiens OX=9606 GN=AHCTF1 PE=1 SV=3	Q8WYP5	1188	68.751	S(0.019)LAMS(0.476)VT(0.151)T(0.048)S(0.077)GFS(0.147)EFTPQS(0.083)ILR	2	-0.27003
sp|Q92616|GCN1_HUMAN Stalled ribosome sensor GCN1 OS=Homo sapiens OX=9606 GN=GCN1 PE=1 SV=7	Q92616	8	44.425	MAADT(0.014)QVS(0.941)ET(0.046)LK	2	0.027877
sp|Q92733|PRCC_HUMAN Proline-rich protein PRCC OS=Homo sapiens OX=9606 GN=PRCC PE=1 SV=1	Q92733	227	54.09	T(0.351)S(0.351)S(0.293)LAPVVGTTTTTPS(0.003)PS(0.003)AIK	2	-0.3538
sp|Q92832|NELL1_HUMAN Protein kinase C-binding protein NELL1 OS=Homo sapiens OX=9606 GN=NELL1 PE=1 SV=4	Q92832	751	55.401	CVS(0.93)DPCLADNIT(0.07)YDIR	2	0.69891
sp|Q92945|FUBP2_HUMAN Far upstream element-binding protein 2 OS=Homo sapiens OX=9606 GN=KHSRP PE=1 SV=4	Q92945	99	56.54	IGGDAAT(0.309)T(0.309)VNNS(0.378)T(0.004)PDFGFGGQK	2	0.34155
sp|Q96B49|TOM6_HUMAN Mitochondrial import receptor subunit TOM6 homolog OS=Homo sapiens OX=9606 GN=TOMM6 PE=1 SV=1	Q96B49	9	40.931	AS(0.052)S(0.116)T(0.104)VPVS(0.673)AAGS(0.047)ANET(0.008)PEIPDNVGDWLR	3	0.79072
sp|Q96BD5|PF21A_HUMAN PHD finger protein 21A OS=Homo sapiens OX=9606 GN=PHF21A PE=1 SV=1	Q96BD5	277	57.148	FT(0.125)PT(0.2)T(0.158)LPT(0.005)S(0.256)QNS(0.256)IHPVR	2	0.56069
sp|Q96BD5|PF21A_HUMAN PHD finger protein 21A OS=Homo sapiens OX=9606 GN=PHF21A PE=1 SV=1	Q96BD5	280	57.148	FT(0.125)PT(0.2)T(0.158)LPT(0.005)S(0.256)QNS(0.256)IHPVR	2	0.56069
sp|Q96H22|CENPN_HUMAN Centromere protein N OS=Homo sapiens OX=9606 GN=CENPN PE=1 SV=2	Q96H22	235	60.828	SLGLDINMDS(1)R	1	-2.8948
sp|Q96HJ9|FMC1_HUMAN Protein FMC1 homolog OS=Homo sapiens OX=9606 GN=FMC1 PE=1 SV=2	Q96HJ9	8	66.692	MAALGS(0.145)PS(0.855)HT(1)FR	2	1.1578
sp|Q96JG9|ZN469_HUMAN Zinc finger protein 469 OS=Homo sapiens OX=9606 GN=ZNF469 PE=2 SV=4	Q96JG9	2065	62.924	ES(0.456)LALALT(0.317)AAHS(0.227)R	2	0.95486
sp|Q96KR1|ZFR_HUMAN Zinc finger RNA-binding protein OS=Homo sapiens OX=9606 GN=ZFR PE=1 SV=2	Q96KR1	195	177.88	AGYS(1)QGATQYTQAQQTR	2	-0.3333
sp|Q96KR1|ZFR_HUMAN Zinc finger RNA-binding protein OS=Homo sapiens OX=9606 GN=ZFR PE=1 SV=2	Q96KR1	476	56.851	GLT(0.063)T(0.073)T(0.01)GNS(0.056)S(0.266)LNS(0.266)TS(0.266)NTK	2	-0.14912
sp|Q96KR1|ZFR_HUMAN Zinc finger RNA-binding protein OS=Homo sapiens OX=9606 GN=ZFR PE=1 SV=2	Q96KR1	479	56.851	GLT(0.063)T(0.073)T(0.01)GNS(0.056)S(0.266)LNS(0.266)TS(0.266)NTK	2	-0.14912
sp|Q96KR1|ZFR_HUMAN Zinc finger RNA-binding protein OS=Homo sapiens OX=9606 GN=ZFR PE=1 SV=2	Q96KR1	481	56.851	GLT(0.063)T(0.073)T(0.01)GNS(0.056)S(0.266)LNS(0.266)TS(0.266)NTK	2	-0.14912
sp|Q96KR1|ZFR_HUMAN Zinc finger RNA-binding protein OS=Homo sapiens OX=9606 GN=ZFR PE=1 SV=2	Q96KR1	422	65.118	LGKPIPS(0.494)T(0.494)EPNVVS(0.008)QATS(0.001)S(0.001)TAVS(0.001)AS(0.001)K	3	-0.46592
sp|Q96KR1|ZFR_HUMAN Zinc finger RNA-binding protein OS=Homo sapiens OX=9606 GN=ZFR PE=1 SV=2	Q96KR1	433	52.198	LGKPIPS(0.001)T(0.001)EPNVVS(0.112)QAT(0.001)S(0.28)S(0.229)T(0.001)AVS(0.188)AS(0.188)K	3	0.045586
sp|Q96KR1|ZFR_HUMAN Zinc finger RNA-binding protein OS=Homo sapiens OX=9606 GN=ZFR PE=1 SV=2	Q96KR1	142	108.71	QQEAPPPPPPAT(0.005)TQNYQDS(0.602)YS(0.393)YVR	2	0.048276
sp|Q96KR1|ZFR_HUMAN Zinc finger RNA-binding protein OS=Homo sapiens OX=9606 GN=ZFR PE=1 SV=2	Q96KR1	144	142.23	QQEAPPPPPPAT(0.018)T(0.004)QNYQDS(0.062)YS(0.915)YVR	2	0.69964
sp|Q96KR1|ZFR_HUMAN Zinc finger RNA-binding protein OS=Homo sapiens OX=9606 GN=ZFR PE=1 SV=2	Q96KR1	180	46.174	QYYQQPT(0.003)AT(0.003)AAAVAAAAQPQPS(0.818)VAET(0.112)YYQT(0.065)APK	3	0.43194
sp|Q96KR1|ZFR_HUMAN Zinc finger RNA-binding protein OS=Homo sapiens OX=9606 GN=ZFR PE=1 SV=2	Q96KR1	528	84.507	S(0.496)T(0.007)PVT(0.002)S(0.496)AVQIPEVK	2	-0.028818
sp|Q96KR1|ZFR_HUMAN Zinc finger RNA-binding protein OS=Homo sapiens OX=9606 GN=ZFR PE=1 SV=2	Q96KR1	533	78.985	S(0.074)T(0.07)PVT(0.003)S(0.852)AVQIPEVK	2	-0.22204
sp|Q96L91|EP400_HUMAN E1A-binding protein p400 OS=Homo sapiens OX=9606 GN=EP400 PE=1 SV=4	Q96L91	2608	70.414	AQPAIT(0.002)TGGS(0.997)AAVLAGTIK	2	0.34079
sp|Q96L91|EP400_HUMAN E1A-binding protein p400 OS=Homo sapiens OX=9606 GN=EP400 PE=1 SV=4	Q96L91	2686	72.676	AVGS(0.823)PAT(0.029)AT(0.092)PDLVS(0.056)MATTQGVR	2	-0.26567
sp|Q96L91|EP400_HUMAN E1A-binding protein p400 OS=Homo sapiens OX=9606 GN=EP400 PE=1 SV=4	Q96L91	2696	66.777	AVGS(0.006)PAT(0.002)AT(0.006)PDLVS(0.96)MAT(0.004)T(0.022)QGVR	2	-0.30532
sp|Q96L91|EP400_HUMAN E1A-binding protein p400 OS=Homo sapiens OX=9606 GN=EP400 PE=1 SV=4	Q96L91	2708	53.328	AVT(0.318)S(0.318)VT(0.318)AS(0.045)AVVTTNLTPVQTPAR	2	0.44182
sp|Q96L91|EP400_HUMAN E1A-binding protein p400 OS=Homo sapiens OX=9606 GN=EP400 PE=1 SV=4	Q96L91	3027	92.457	T(0.11)QFLT(0.001)TPIS(0.888)QAQK	2	0.027951
sp|Q96PK6|RBM14_HUMAN RNA-binding protein 14 OS=Homo sapiens OX=9606 GN=RBM14 PE=1 SV=2	Q96PK6	254	111.52	AQPS(0.804)AS(0.196)LGVGYR	2	0.13148
sp|Q96PK6|RBM14_HUMAN RNA-binding protein 14 OS=Homo sapiens OX=9606 GN=RBM14 PE=1 SV=2	Q96PK6	256	111.52	AQPS(0.308)AS(0.692)LGVGYR	2	0.029138
sp|Q96PK6|RBM14_HUMAN RNA-binding protein 14 OS=Homo sapiens OX=9606 GN=RBM14 PE=1 SV=2	Q96PK6	242	133.05	AQPS(0.642)VS(0.358)LGAAYR	2	0.15414
sp|Q96PK6|RBM14_HUMAN RNA-binding protein 14 OS=Homo sapiens OX=9606 GN=RBM14 PE=1 SV=2	Q96PK6	244	133.05	AQPS(0.226)VS(0.774)LGAAYR	2	-0.21306
sp|Q96PK6|RBM14_HUMAN RNA-binding protein 14 OS=Homo sapiens OX=9606 GN=RBM14 PE=1 SV=2	Q96PK6	278	151.79	AQPS(0.739)VS(0.261)LGAPYR	2	-0.27732
sp|Q96PK6|RBM14_HUMAN RNA-binding protein 14 OS=Homo sapiens OX=9606 GN=RBM14 PE=1 SV=2	Q96PK6	280	119.39	AQPS(0.136)VS(0.864)LGAPYR	1	-0.47127
sp|Q96PK6|RBM14_HUMAN RNA-binding protein 14 OS=Homo sapiens OX=9606 GN=RBM14 PE=1 SV=2	Q96PK6	520	67.136	T(0.235)QS(0.644)S(0.119)AS(0.002)LAASYAAQQHPQAAASYR	3	-0.29965
sp|Q96PK6|RBM14_HUMAN RNA-binding protein 14 OS=Homo sapiens OX=9606 GN=RBM14 PE=1 SV=2	Q96PK6	521	56.131	T(0.102)QS(0.292)S(0.292)AS(0.292)LAAS(0.019)YAAQQHPQAAAS(0.004)YR	3	0.016105
sp|Q96PK6|RBM14_HUMAN RNA-binding protein 14 OS=Homo sapiens OX=9606 GN=RBM14 PE=1 SV=2	Q96PK6	523	56.131	T(0.102)QS(0.292)S(0.292)AS(0.292)LAAS(0.019)YAAQQHPQAAAS(0.004)YR	3	0.016105
sp|Q96RE9|ZN300_HUMAN Zinc finger protein 300 OS=Homo sapiens OX=9606 GN=ZNF300 PE=1 SV=1	Q96RE9	4	64.64	MMKS(0.968)QGLVS(0.032)FK	2	-0.48182
sp|Q96RK0|CIC_HUMAN Protein capicua homolog OS=Homo sapiens OX=9606 GN=CIC PE=1 SV=2	Q96RK0	132	69.935	GPPPTTEEEAS(1)GPPGEPR	2	-1.0347
sp|Q96RN5|MED15_HUMAN Mediator of RNA polymerase II transcription subunit 15 OS=Homo sapiens OX=9606 GN=MED15 PE=1 SV=2	Q96RN5	408	73.153	FPPT(0.03)T(0.125)AVS(0.766)AIPS(0.035)S(0.035)S(0.009)IPLGR	3	0.50371
sp|Q96RN5|MED15_HUMAN Mediator of RNA polymerase II transcription subunit 15 OS=Homo sapiens OX=9606 GN=MED15 PE=1 SV=2	Q96RN5	412	60.093	FPPT(0.031)T(0.031)AVS(0.106)AIPS(0.327)S(0.252)S(0.252)IPLGR	3	-0.86673
sp|Q96RN5|MED15_HUMAN Mediator of RNA polymerase II transcription subunit 15 OS=Homo sapiens OX=9606 GN=MED15 PE=1 SV=2	Q96RN5	413	74.364	FPPT(0.017)T(0.02)AVS(0.061)AIPS(0.209)S(0.541)S(0.153)IPLGR	3	0.78243
sp|Q96RN5|MED15_HUMAN Mediator of RNA polymerase II transcription subunit 15 OS=Homo sapiens OX=9606 GN=MED15 PE=1 SV=2	Q96RN5	414	74.364	FPPTTAVS(0.011)AIPS(0.296)S(0.347)S(0.347)IPLGR	3	0.031159
sp|Q96T58|MINT_HUMAN Msx2-interacting protein OS=Homo sapiens OX=9606 GN=SPEN PE=1 SV=1	Q96T58	3433	47.803	AQAET(0.073)GPT(0.289)S(0.086)FPS(0.397)PVS(0.112)VS(0.024)MKPDLPVS(0.018)LPTQTAPK	3	-0.7202
sp|Q96T58|MINT_HUMAN Msx2-interacting protein OS=Homo sapiens OX=9606 GN=SPEN PE=1 SV=1	Q96T58	2512	107.11	AQS(0.688)T(0.012)PS(0.3)PALPPDTK	2	-0.19489
sp|Q96T58|MINT_HUMAN Msx2-interacting protein OS=Homo sapiens OX=9606 GN=SPEN PE=1 SV=1	Q96T58	2515	107.11	AQS(0.239)TPS(0.753)PALPPDT(0.007)K	2	0.25439
sp|Q96T58|MINT_HUMAN Msx2-interacting protein OS=Homo sapiens OX=9606 GN=SPEN PE=1 SV=1	Q96T58	2525	125.36	AS(0.956)DVDTS(0.015)S(0.015)S(0.015)TLR	2	-0.052718
sp|Q96T58|MINT_HUMAN Msx2-interacting protein OS=Homo sapiens OX=9606 GN=SPEN PE=1 SV=1	Q96T58	3463	58.08	QPLFVPT(0.316)T(0.316)S(0.316)GPS(0.043)T(0.009)PPGLVLPHTEFQPAPK	3	0.96078
sp|Q96T58|MINT_HUMAN Msx2-interacting protein OS=Homo sapiens OX=9606 GN=SPEN PE=1 SV=1	Q96T58	3466	55.171	QPLFVPT(0.023)T(0.065)S(0.197)GPS(0.628)T(0.087)PPGLVLPHTEFQPAPK	3	0.044376
sp|Q96T58|MINT_HUMAN Msx2-interacting protein OS=Homo sapiens OX=9606 GN=SPEN PE=1 SV=1	Q96T58	2684	73.067	S(0.024)LVS(0.883)T(0.093)PAGPVNVLK	2	0.41836
sp|Q96T58|MINT_HUMAN Msx2-interacting protein OS=Homo sapiens OX=9606 GN=SPEN PE=1 SV=1	Q96T58	2864	82.877	S(0.056)QVKPDS(0.257)VTAS(0.43)QPPS(0.257)K	2	-0.02622
sp|Q96T58|MINT_HUMAN Msx2-interacting protein OS=Homo sapiens OX=9606 GN=SPEN PE=1 SV=1	Q96T58	2594	73.981	T(0.016)APPVT(0.053)NNS(0.889)EIQAS(0.042)EVLVAADKEK	3	-0.7165
sp|Q96T58|MINT_HUMAN Msx2-interacting protein OS=Homo sapiens OX=9606 GN=SPEN PE=1 SV=1	Q96T58	2599	86.48	T(0.001)APPVT(0.186)NNS(0.211)EIQAS(0.602)EVLVAADKEK	3	0.026298
sp|Q96T58|MINT_HUMAN Msx2-interacting protein OS=Homo sapiens OX=9606 GN=SPEN PE=1 SV=1	Q96T58	2463	50.986	VHS(0.013)IIES(0.035)DPVT(0.194)PPS(0.598)DPS(0.081)IPIPT(0.038)LPS(0.035)VT(0.006)AAK	3	0.50009
sp|Q96T58|MINT_HUMAN Msx2-interacting protein OS=Homo sapiens OX=9606 GN=SPEN PE=1 SV=1	Q96T58	2466	50.986	VHS(0.026)IIES(0.026)DPVT(0.128)PPS(0.408)DPS(0.408)IPIPT(0.003)LPS(0.002)VTAAK	3	0.2755
sp|Q96T58|MINT_HUMAN Msx2-interacting protein OS=Homo sapiens OX=9606 GN=SPEN PE=1 SV=1	Q96T58	2811	130.47	VNT(0.011)S(0.597)EGVVLLS(0.196)YS(0.196)GQK	2	0.40988
sp|Q96T58|MINT_HUMAN Msx2-interacting protein OS=Homo sapiens OX=9606 GN=SPEN PE=1 SV=1	Q96T58	2818	130.47	VNT(0.306)S(0.193)EGVVLLS(0.444)YS(0.057)GQK	2	0.1517
sp|Q96T58|MINT_HUMAN Msx2-interacting protein OS=Homo sapiens OX=9606 GN=SPEN PE=1 SV=1	Q96T58	2820	130.47	VNT(0.123)S(0.174)EGVVLLS(0.174)YS(0.528)GQK	2	-0.28737
sp|Q99551|MTEF1_HUMAN Transcription termination factor 1, mitochondrial OS=Homo sapiens OX=9606 GN=MTERF1 PE=1 SV=1	Q99551	12	48.351	QS(0.149)LS(0.177)LGQTS(0.121)IS(0.553)K	3	-1.0206
sp|Q99607|ELF4_HUMAN ETS-related transcription factor Elf-4 OS=Homo sapiens OX=9606 GN=ELF4 PE=1 SV=1	Q99607	369	40.146	IQHVGLQPS(0.112)AS(0.112)LELGPS(0.367)LDEEIPT(0.1)T(0.1)S(0.1)T(0.1)MLVS(0.009)PAEGQVK	3	0.52725
sp|Q99607|ELF4_HUMAN ETS-related transcription factor Elf-4 OS=Homo sapiens OX=9606 GN=ELF4 PE=1 SV=1	Q99607	378	44.915	IQHVGLQPS(0.007)AS(0.007)LELGPS(0.052)LDEEIPT(0.196)T(0.196)S(0.222)T(0.222)MLVS(0.097)PAEGQVK	3	0.83232
sp|Q99700|ATX2_HUMAN Ataxin-2 OS=Homo sapiens OX=9606 GN=ATXN2 PE=1 SV=2	Q99700	215	47.337	KPGGS(0.004)GLLAS(0.004)PAAAPS(0.111)PS(0.223)S(0.092)S(0.047)S(0.092)VS(0.111)S(0.111)S(0.111)S(0.056)AT(0.015)APS(0.007)S(0.007)VVAATS(0.01)GGGR	4	-0.57578
sp|Q99700|ATX2_HUMAN Ataxin-2 OS=Homo sapiens OX=9606 GN=ATXN2 PE=1 SV=2	Q99700	216	47.337	KPGGS(0.021)GLLAS(0.022)PAAAPS(0.116)PS(0.195)S(0.195)S(0.195)S(0.106)VS(0.022)S(0.023)S(0.021)S(0.021)AT(0.005)APS(0.019)S(0.019)VVAATS(0.019)GGGR	3	0.43338
sp|Q99700|ATX2_HUMAN Ataxin-2 OS=Homo sapiens OX=9606 GN=ATXN2 PE=1 SV=2	Q99700	217	47.337	KPGGS(0.021)GLLAS(0.022)PAAAPS(0.116)PS(0.195)S(0.195)S(0.195)S(0.106)VS(0.022)S(0.023)S(0.021)S(0.021)AT(0.005)APS(0.019)S(0.019)VVAATS(0.019)GGGR	3	0.43338
sp|Q99700|ATX2_HUMAN Ataxin-2 OS=Homo sapiens OX=9606 GN=ATXN2 PE=1 SV=2	Q99700	220	68.831	KPGGS(0.002)GLLAS(0.002)PAAAPS(0.003)PS(0.009)S(0.009)S(0.009)S(0.034)VS(0.559)S(0.16)S(0.135)S(0.04)AT(0.004)APS(0.015)S(0.015)VVAATS(0.004)GGGR	3	-0.64273
sp|Q99708|CTIP_HUMAN DNA endonuclease RBBP8 OS=Homo sapiens OX=9606 GN=RBBP8 PE=1 SV=2	Q99708	696	47.568	LGGET(0.966)VDMDCT(0.058)LVS(0.951)ET(0.025)VLLK	3	-1.8544
sp|Q9BS26|ERP44_HUMAN Endoplasmic reticulum resident protein 44 OS=Homo sapiens OX=9606 GN=ERP44 PE=1 SV=1	Q9BS26	380	86.573	EFHHGPDPT(0.296)DT(0.296)APGEQAQDVAS(0.753)S(0.553)PPES(0.053)S(0.05)FQK	3	0.039439
sp|Q9BS26|ERP44_HUMAN Endoplasmic reticulum resident protein 44 OS=Homo sapiens OX=9606 GN=ERP44 PE=1 SV=1	Q9BS26	381	86.573	EFHHGPDPT(0.296)DT(0.296)APGEQAQDVAS(0.753)S(0.553)PPES(0.053)S(0.05)FQK	3	0.039439
sp|Q9BS26|ERP44_HUMAN Endoplasmic reticulum resident protein 44 OS=Homo sapiens OX=9606 GN=ERP44 PE=1 SV=1	Q9BS26	385	60.595	EFHHGPDPT(0.006)DT(0.055)APGEQAQDVAS(0.235)S(0.235)PPES(0.235)S(0.235)FQK	3	-1.0948
sp|Q9BS26|ERP44_HUMAN Endoplasmic reticulum resident protein 44 OS=Homo sapiens OX=9606 GN=ERP44 PE=1 SV=1	Q9BS26	386	60.595	EFHHGPDPT(0.006)DT(0.055)APGEQAQDVAS(0.235)S(0.235)PPES(0.235)S(0.235)FQK	3	-1.0948
sp|Q9BSH4|TACO1_HUMAN Translational activator of cytochrome c oxidase 1 OS=Homo sapiens OX=9606 GN=TACO1 PE=1 SV=1	Q9BSH4	8	48.794	MS(0.003)AWAAAS(0.499)LS(0.499)R	2	-0.11608
sp|Q9BSH4|TACO1_HUMAN Translational activator of cytochrome c oxidase 1 OS=Homo sapiens OX=9606 GN=TACO1 PE=1 SV=1	Q9BSH4	10	48.794	MS(0.003)AWAAAS(0.499)LS(0.499)R	2	-0.11608
sp|Q9BSW2|EFC4B_HUMAN EF-hand calcium-binding domain-containing protein 4B OS=Homo sapiens OX=9606 GN=CRACR2A PE=1 SV=2	Q9BSW2	521	53.775	LT(0.042)PT(0.959)S(0.999)PR	1	0.80352
sp|Q9BTC0|DIDO1_HUMAN Death-inducer obliterator 1 OS=Homo sapiens OX=9606 GN=DIDO1 PE=1 SV=5	Q9BTC0	1277	54.05	VLS(0.244)S(0.244)LKPAAPS(0.169)PAT(0.116)AAT(0.095)T(0.095)AAAAS(0.005)TAAS(0.004)S(0.004)TAS(0.009)S(0.008)AS(0.007)K	4	-0.87229
sp|Q9BTC0|DIDO1_HUMAN Death-inducer obliterator 1 OS=Homo sapiens OX=9606 GN=DIDO1 PE=1 SV=5	Q9BTC0	1278	54.05	VLS(0.244)S(0.244)LKPAAPS(0.169)PAT(0.116)AAT(0.095)T(0.095)AAAAS(0.005)TAAS(0.004)S(0.004)TAS(0.009)S(0.008)AS(0.007)K	4	-0.87229
sp|Q9BTC0|DIDO1_HUMAN Death-inducer obliterator 1 OS=Homo sapiens OX=9606 GN=DIDO1 PE=1 SV=5	Q9BTC0	1285	65.349	VLS(0.1)S(0.103)LKPAAPS(0.426)PAT(0.402)AAT(0.327)T(0.354)AAAAS(0.119)T(0.036)AAS(0.077)S(0.01)T(0.001)AS(0.016)S(0.014)AS(0.014)K	3	-0.49792
sp|Q9BTC0|DIDO1_HUMAN Death-inducer obliterator 1 OS=Homo sapiens OX=9606 GN=DIDO1 PE=1 SV=5	Q9BTC0	1305	101.77	VLS(0.002)S(0.002)LKPAAPS(0.002)PAT(0.004)AAT(0.061)T(0.061)AAAAS(0.107)T(0.03)AAS(0.073)S(0.073)T(0.002)AS(0.22)S(0.181)AS(0.181)K	3	0.003144
sp|Q9BTC0|DIDO1_HUMAN Death-inducer obliterator 1 OS=Homo sapiens OX=9606 GN=DIDO1 PE=1 SV=5	Q9BTC0	1306	98.095	VLS(0.031)S(0.031)LKPAAPS(0.009)PAT(0.001)AAT(0.014)T(0.05)AAAAS(0.098)T(0.001)AAS(0.076)S(0.076)T(0.003)AS(0.203)S(0.203)AS(0.203)K	3	0.49845
sp|Q9BTC0|DIDO1_HUMAN Death-inducer obliterator 1 OS=Homo sapiens OX=9606 GN=DIDO1 PE=1 SV=5	Q9BTC0	1308	98.095	VLS(0.031)S(0.031)LKPAAPS(0.009)PAT(0.001)AAT(0.014)T(0.05)AAAAS(0.098)T(0.001)AAS(0.076)S(0.076)T(0.003)AS(0.203)S(0.203)AS(0.203)K	3	0.49845
sp|Q9BV73|CP250_HUMAN Centrosome-associated protein CEP250 OS=Homo sapiens OX=9606 GN=CEP250 PE=1 SV=2	Q9BV73	2424	41.455	RLDES(0.028)LTQS(0.028)LT(0.103)S(0.635)PGPVLLHPS(0.032)PS(0.047)T(0.04)T(0.04)QAAS(0.047)R	4	0.48884
sp|Q9BWF3|RBM4_HUMAN RNA-binding protein 4 OS=Homo sapiens OX=9606 GN=RBM4 PE=1 SV=1	Q9BWF3	300	98.538	HLLPTSGAAAT(0.001)AAAAAAAAAAVT(0.213)AAS(0.662)T(0.038)S(0.085)YYGR	3	0.51275
sp|Q9BWF3|RBM4_HUMAN RNA-binding protein 4 OS=Homo sapiens OX=9606 GN=RBM4 PE=1 SV=1	Q9BWF3	302	72.107	HLLPTSGAAATAAAAAAAAAAVTAAS(0.303)T(0.001)S(0.696)YYGR	4	0.90715
sp|Q9BYJ9|YTHD1_HUMAN YTH domain-containing family protein 1 OS=Homo sapiens OX=9606 GN=YTHDF1 PE=1 SV=1	Q9BYJ9	196	113.44	IGDVS(0.572)S(0.26)S(0.169)AVK	2	-0.60685
sp|Q9BYJ9|YTHD1_HUMAN YTH domain-containing family protein 1 OS=Homo sapiens OX=9606 GN=YTHDF1 PE=1 SV=1	Q9BYJ9	197	113.44	IGDVS(0.464)S(0.464)S(0.073)AVK	2	0.34543
sp|Q9BYJ9|YTHD1_HUMAN YTH domain-containing family protein 1 OS=Homo sapiens OX=9606 GN=YTHDF1 PE=1 SV=1	Q9BYJ9	198	96.015	IGDVS(0.333)S(0.333)S(0.333)AVK	2	0.18159
sp|Q9BYJ9|YTHD1_HUMAN YTH domain-containing family protein 1 OS=Homo sapiens OX=9606 GN=YTHDF1 PE=1 SV=1	Q9BYJ9	5	63.076	S(0.004)AT(0.494)S(0.494)VDT(0.001)QRT(0.007)K	2	3.6356
sp|Q9GZU1|MCLN1_HUMAN Mucolipin-1 OS=Homo sapiens OX=9606 GN=MCOLN1 PE=1 SV=1	Q9GZU1	10	57.267	MTAPAGPRGS(0.999)ETER	2	1.8883
sp|Q9GZW8|MS4A7_HUMAN Membrane-spanning 4-domains subfamily A member 7 OS=Homo sapiens OX=9606 GN=MS4A7 PE=1 SV=1	Q9GZW8	11	45.661	LLQS(0.018)QT(0.088)MGVS(0.878)HS(0.008)FT(0.008)PK	2	-2.1238
sp|Q9H0E3|SP130_HUMAN Histone deacetylase complex subunit SAP130 OS=Homo sapiens OX=9606 GN=SAP130 PE=1 SV=1	Q9H0E3	300	55.206	AQS(0.618)PVIT(0.275)T(0.076)T(0.023)AAHAT(0.004)DS(0.001)ALS(0.001)RPT(0.001)LSIQHPPSAAISIQR	4	-0.15453
sp|Q9H0E3|SP130_HUMAN Histone deacetylase complex subunit SAP130 OS=Homo sapiens OX=9606 GN=SAP130 PE=1 SV=1	Q9H0E3	349	127.57	IT(0.311)LPS(0.689)HPALGTPK	3	1.1237
sp|Q9H0E9|BRD8_HUMAN Bromodomain-containing protein 8 OS=Homo sapiens OX=9606 GN=BRD8 PE=1 SV=2	Q9H0E9	290	61.703	LLEAGPT(0.009)QFT(0.041)T(0.209)PLAS(0.113)FT(0.049)T(0.049)VAS(0.53)EPPVK	3	0.35007
sp|Q9H165|BC11A_HUMAN B-cell lymphoma/leukemia 11A OS=Homo sapiens OX=9606 GN=BCL11A PE=1 SV=2	Q9H165	633	64.297	LLLGS(0.041)PS(0.041)S(0.041)LS(0.048)PFS(0.83)KR	2	0.37428
sp|Q9H4A3|WNK1_HUMAN Serine/threonine-protein kinase WNK1 OS=Homo sapiens OX=9606 GN=WNK1 PE=1 SV=2	Q9H4A3	1849	71.529	EGPVLAT(0.002)S(0.638)S(0.36)GAGVFK	2	0.73177
sp|Q9H4A3|WNK1_HUMAN Serine/threonine-protein kinase WNK1 OS=Homo sapiens OX=9606 GN=WNK1 PE=1 SV=2	Q9H4A3	1234	74.206	QPIPAS(0.499)S(0.499)MPQQIGIPTSSLTQVVHSAGR	3	-1.6484
sp|Q9H4A3|WNK1_HUMAN Serine/threonine-protein kinase WNK1 OS=Homo sapiens OX=9606 GN=WNK1 PE=1 SV=2	Q9H4A3	1235	74.206	QPIPAS(0.499)S(0.499)MPQQIGIPTSSLTQVVHSAGR	3	-1.6484
sp|Q9H4I2|ZHX3_HUMAN Zinc fingers and homeoboxes protein 3 OS=Homo sapiens OX=9606 GN=ZHX3 PE=1 SV=3	Q9H4I2	246	75.608	EGDHS(0.055)FINGAVPVS(0.159)QAS(0.159)AS(0.159)S(0.469)AK	2	-1.737
sp|Q9H7R0|ZN442_HUMAN Zinc finger protein 442 OS=Homo sapiens OX=9606 GN=ZNF442 PE=2 SV=1	Q9H7R0	610	65.179	ALS(0.996)S(0.181)LS(0.113)S(0.71)LHR	3	-1.8126
sp|Q9H7R0|ZN442_HUMAN Zinc finger protein 442 OS=Homo sapiens OX=9606 GN=ZNF442 PE=2 SV=1	Q9H7R0	614	65.179	ALS(0.996)S(0.181)LS(0.113)S(0.71)LHR	3	-1.8126
sp|Q9HAP2|MLXIP_HUMAN MLX-interacting protein OS=Homo sapiens OX=9606 GN=MLXIP PE=1 SV=2	Q9HAP2	602	47.774	EGMLAS(0.308)T(0.308)VS(0.308)QS(0.075)NVVIAPAAIAR	2	-0.50165
sp|Q9HAP2|MLXIP_HUMAN MLX-interacting protein OS=Homo sapiens OX=9606 GN=MLXIP PE=1 SV=2	Q9HAP2	605	47.774	EGMLAS(0.308)T(0.308)VS(0.308)QS(0.075)NVVIAPAAIAR	2	-0.50165
sp|Q9HBE4|IL21_HUMAN Interleukin-21 OS=Homo sapiens OX=9606 GN=IL21 PE=1 SV=3	Q9HBE4	142	72.434	S(0.983)LLQKMIHQHLS(0.008)S(0.008)R	2	-0.11349
sp|Q9HBM6|TAF9B_HUMAN Transcription initiation factor TFIID subunit 9B OS=Homo sapiens OX=9606 GN=TAF9B PE=1 SV=1	Q9HBM6	152	53.481	LS(0.087)VGAVS(0.523)S(0.268)KPT(0.013)T(0.017)PT(0.003)IATPQTVS(0.087)VPNK	3	0.7629
sp|Q9HCD6|TANC2_HUMAN Protein TANC2 OS=Homo sapiens OX=9606 GN=TANC2 PE=1 SV=3	Q9HCD6	5	41.427	MFRNS(1)LK	2	0.65135
sp|Q9HCK8|CHD8_HUMAN Chromodomain-helicase-DNA-binding protein 8 OS=Homo sapiens OX=9606 GN=CHD8 PE=1 SV=5	Q9HCK8	2518	66.335	APGYPS(0.457)S(0.457)PVTTAS(0.084)GTT(0.001)LR	2	0.87921
sp|Q9HCK8|CHD8_HUMAN Chromodomain-helicase-DNA-binding protein 8 OS=Homo sapiens OX=9606 GN=CHD8 PE=1 SV=5	Q9HCK8	2519	66.335	APGYPS(0.457)S(0.457)PVTTAS(0.084)GTT(0.001)LR	2	0.87921
sp|Q9HCK8|CHD8_HUMAN Chromodomain-helicase-DNA-binding protein 8 OS=Homo sapiens OX=9606 GN=CHD8 PE=1 SV=5	Q9HCK8	2525	75.877	APGYPS(0.083)S(0.236)PVTTAS(0.68)GTTLR	2	0.0091009
sp|Q9NPI6|DCP1A_HUMAN mRNA-decapping enzyme 1A OS=Homo sapiens OX=9606 GN=DCP1A PE=1 SV=3	Q9NPI6	479	45.084	VLS(0.289)S(0.292)AIPVAGAPLVT(0.283)AT(0.283)T(0.283)T(0.283)AVS(0.102)S(0.101)VLLAPS(0.084)VFQQTVTR	3	-0.26859
sp|Q9NPI6|DCP1A_HUMAN mRNA-decapping enzyme 1A OS=Homo sapiens OX=9606 GN=DCP1A PE=1 SV=3	Q9NPI6	480	45.084	VLS(0.289)S(0.292)AIPVAGAPLVT(0.283)AT(0.283)T(0.283)T(0.283)AVS(0.102)S(0.101)VLLAPS(0.084)VFQQTVTR	3	-0.26859
sp|Q9NPI6|DCP1A_HUMAN mRNA-decapping enzyme 1A OS=Homo sapiens OX=9606 GN=DCP1A PE=1 SV=3	Q9NPI6	498	53.569	VLS(0.01)S(0.011)AIPVAGAPLVT(0.295)AT(0.295)T(0.28)T(0.28)AVS(0.601)S(0.158)VLLAPS(0.068)VFQQTVTR	3	1.3847
sp|Q9NPI6|DCP1A_HUMAN mRNA-decapping enzyme 1A OS=Homo sapiens OX=9606 GN=DCP1A PE=1 SV=3	Q9NPI6	499	41.914	VLS(0.014)S(0.014)AIPVAGAPLVT(0.143)AT(0.143)T(0.143)T(0.143)AVS(0.192)S(0.192)VLLAPS(0.014)VFQQTVTR	4	-0.13446
sp|Q9NXV6|CARF_HUMAN CDKN2A-interacting protein OS=Homo sapiens OX=9606 GN=CDKN2AIP PE=1 SV=3	Q9NXV6	349	68.536	S(0.727)S(0.139)S(0.034)S(0.034)TNTS(0.034)LLTS(0.034)K	2	0.84639
sp|Q9NXV6|CARF_HUMAN CDKN2A-interacting protein OS=Homo sapiens OX=9606 GN=CDKN2AIP PE=1 SV=3	Q9NXV6	350	68.044	S(0.276)S(0.276)S(0.276)S(0.049)TNTS(0.049)LLTS(0.073)K	2	0.53823
sp|Q9NXV6|CARF_HUMAN CDKN2A-interacting protein OS=Homo sapiens OX=9606 GN=CDKN2AIP PE=1 SV=3	Q9NXV6	351	68.044	S(0.276)S(0.276)S(0.276)S(0.049)TNTS(0.049)LLTS(0.073)K	2	0.53823
sp|Q9NXV6|CARF_HUMAN CDKN2A-interacting protein OS=Homo sapiens OX=9606 GN=CDKN2AIP PE=1 SV=3	Q9NXV6	331	75.02	T(0.038)S(0.014)S(0.008)EAS(0.023)VS(0.006)S(0.455)S(0.455)VAK	2	1.252
sp|Q9NXV6|CARF_HUMAN CDKN2A-interacting protein OS=Homo sapiens OX=9606 GN=CDKN2AIP PE=1 SV=3	Q9NXV6	332	75.02	T(0.038)S(0.014)S(0.008)EAS(0.023)VS(0.006)S(0.455)S(0.455)VAK	2	1.252
sp|Q9NYV4|CDK12_HUMAN Cyclin-dependent kinase 12 OS=Homo sapiens OX=9606 GN=CDK12 PE=1 SV=2	Q9NYV4	593	47.397	T(0.123)S(0.213)AVS(0.213)S(0.213)QANS(0.213)QPPVQVS(0.026)VK	2	-0.2278
sp|Q9NYV4|CDK12_HUMAN Cyclin-dependent kinase 12 OS=Homo sapiens OX=9606 GN=CDK12 PE=1 SV=2	Q9NYV4	596	85.457	TS(0.016)AVS(0.727)S(0.117)QANS(0.082)QPPVQVS(0.059)VK	2	-0.99142
sp|Q9NYV4|CDK12_HUMAN Cyclin-dependent kinase 12 OS=Homo sapiens OX=9606 GN=CDK12 PE=1 SV=2	Q9NYV4	597	82.515	T(0.007)S(0.007)AVS(0.492)S(0.492)QANSQPPVQVSVK	2	-1.4993
sp|Q9NYV4|CDK12_HUMAN Cyclin-dependent kinase 12 OS=Homo sapiens OX=9606 GN=CDK12 PE=1 SV=2	Q9NYV4	601	47.397	T(0.123)S(0.213)AVS(0.213)S(0.213)QANS(0.213)QPPVQVS(0.026)VK	2	-0.2278
sp|Q9NYV4|CDK12_HUMAN Cyclin-dependent kinase 12 OS=Homo sapiens OX=9606 GN=CDK12 PE=1 SV=2	Q9NYV4	608	147.17	TSAVS(0.009)S(0.019)QANS(0.019)QPPVQVS(0.952)VK	2	-0.892
sp|Q9NYZ4|SIGL8_HUMAN Sialic acid-binding Ig-like lectin 8 OS=Homo sapiens OX=9606 GN=SIGLEC8 PE=1 SV=2	Q9NYZ4	110	59.116	FQLLGDIWSNDCS(0.002)LS(0.998)IRDAR	2	1.6491
sp|Q9NZN8|CNOT2_HUMAN CCR4-NOT transcription complex subunit 2 OS=Homo sapiens OX=9606 GN=CNOT2 PE=1 SV=1	Q9NZN8	120	40.453	S(0.002)LS(0.005)QGT(0.012)QLPS(0.032)HVT(0.092)PT(0.106)T(0.106)GVPT(0.106)MS(0.31)LHT(0.056)PPS(0.086)PS(0.086)R	4	0.87665
sp|Q9P2N5|RBM27_HUMAN RNA-binding protein 27 OS=Homo sapiens OX=9606 GN=RBM27 PE=1 SV=2	Q9P2N5	546	129.89	AANIVIQT(0.013)EPPVPVS(0.839)INS(0.148)NITR	3	-0.9684
sp|Q9P2N5|RBM27_HUMAN RNA-binding protein 27 OS=Homo sapiens OX=9606 GN=RBM27 PE=1 SV=2	Q9P2N5	549	167.97	AANIVIQTEPPVPVS(0.2)INS(0.8)NITR	2	-0.13142
sp|Q9P2N6|KANL3_HUMAN KAT8 regulatory NSL complex subunit 3 OS=Homo sapiens OX=9606 GN=KANSL3 PE=1 SV=2	Q9P2N6	708	47.104	S(0.07)S(0.07)S(0.065)S(0.065)EGGVS(0.296)AS(0.296)PVPS(0.015)VVS(0.03)S(0.03)S(0.03)T(0.001)APS(0.027)ALHTLQS(0.006)R	3	-0.26551
sp|Q9P2N6|KANL3_HUMAN KAT8 regulatory NSL complex subunit 3 OS=Homo sapiens OX=9606 GN=KANSL3 PE=1 SV=2	Q9P2N6	710	47.104	S(0.07)S(0.07)S(0.065)S(0.065)EGGVS(0.296)AS(0.296)PVPS(0.015)VVS(0.03)S(0.03)S(0.03)T(0.001)APS(0.027)ALHTLQS(0.006)R	3	-0.26551
sp|Q9UBL3|ASH2L_HUMAN Set1/Ash2 histone methyltransferase complex subunit ASH2 OS=Homo sapiens OX=9606 GN=ASH2L PE=1 SV=1	Q9UBL3	92	45.011	DT(0.032)LEGAGDT(0.538)S(0.521)EVMDT(0.889)QAGS(0.02)VDEENGR	3	1.5333
sp|Q9UGU0|TCF20_HUMAN Transcription factor 20 OS=Homo sapiens OX=9606 GN=TCF20 PE=1 SV=3	Q9UGU0	237	56.612	VGQFGQHYQS(0.206)S(0.166)AS(0.166)S(0.166)S(0.166)S(0.019)S(0.028)S(0.028)S(0.028)FPS(0.028)PQR	3	-0.81355
sp|Q9UGU0|TCF20_HUMAN Transcription factor 20 OS=Homo sapiens OX=9606 GN=TCF20 PE=1 SV=3	Q9UGU0	238	56.612	VGQFGQHYQS(0.197)S(0.197)AS(0.063)S(0.021)S(0.021)S(0.15)S(0.15)S(0.049)S(0.114)FPS(0.038)PQR	3	0.038679
sp|Q9UGU0|TCF20_HUMAN Transcription factor 20 OS=Homo sapiens OX=9606 GN=TCF20 PE=1 SV=3	Q9UGU0	242	68.934	VGQFGQHYQS(0.052)S(0.062)AS(0.062)S(0.074)S(0.446)S(0.074)S(0.074)S(0.074)S(0.074)FPS(0.011)PQR	3	-0.0077565
sp|Q9UGU0|TCF20_HUMAN Transcription factor 20 OS=Homo sapiens OX=9606 GN=TCF20 PE=1 SV=3	Q9UGU0	244	54.517	VGQFGQHYQS(0.1)S(0.1)AS(0.125)S(0.066)S(0.066)S(0.066)S(0.158)S(0.158)S(0.125)FPS(0.037)PQR	3	-0.55622
sp|Q9UGU0|TCF20_HUMAN Transcription factor 20 OS=Homo sapiens OX=9606 GN=TCF20 PE=1 SV=3	Q9UGU0	245	54.517	VGQFGQHYQS(0.1)S(0.1)AS(0.125)S(0.066)S(0.066)S(0.066)S(0.158)S(0.158)S(0.125)FPS(0.037)PQR	3	-0.55622
sp|Q9UHD9|UBQL2_HUMAN Ubiquilin-2 OS=Homo sapiens OX=9606 GN=UBQLN2 PE=1 SV=2	Q9UHD9	104	71.811	S(0.432)QNRPQGQS(0.432)T(0.049)QPS(0.049)NAAGT(0.019)NTTS(0.011)AS(0.008)TPR	3	-0.31895
sp|Q9UHD9|UBQL2_HUMAN Ubiquilin-2 OS=Homo sapiens OX=9606 GN=UBQLN2 PE=1 SV=2	Q9UHD9	112	71.811	S(0.432)QNRPQGQS(0.432)T(0.049)QPS(0.049)NAAGT(0.019)NTTS(0.011)AS(0.008)TPR	3	-0.31895
sp|Q9UHD9|UBQL2_HUMAN Ubiquilin-2 OS=Homo sapiens OX=9606 GN=UBQLN2 PE=1 SV=2	Q9UHD9	116	101.23	S(0.033)QNRPQGQS(0.047)T(0.022)QPS(0.793)NAAGT(0.234)NT(0.229)T(0.229)S(0.23)AS(0.097)T(0.086)PR	3	-0.48383
sp|Q9UHD9|UBQL2_HUMAN Ubiquilin-2 OS=Homo sapiens OX=9606 GN=UBQLN2 PE=1 SV=2	Q9UHD9	125	70.54	S(0.053)QNRPQGQS(0.076)T(0.181)QPS(0.053)NAAGTNTTS(0.366)AS(0.27)TPR	3	-0.34646
sp|Q9UHR5|S30BP_HUMAN SAP30-binding protein OS=Homo sapiens OX=9606 GN=SAP30BP PE=1 SV=1	Q9UHR5	237	177.24	KGT(0.052)T(0.052)T(0.052)NAT(0.003)S(0.507)T(0.005)T(0.033)T(0.01)T(0.097)T(0.043)AS(0.133)T(0.012)AVADAQK	3	-0.13142
sp|Q9UHR5|S30BP_HUMAN SAP30-binding protein OS=Homo sapiens OX=9606 GN=SAP30BP PE=1 SV=1	Q9UHR5	244	205.53	KGTTTNATS(0.041)TTTT(0.001)T(0.001)AS(0.956)TAVADAQK	3	0.10748
sp|Q9UIU6|SIX4_HUMAN Homeobox protein SIX4 OS=Homo sapiens OX=9606 GN=SIX4 PE=1 SV=2	Q9UIU6	640	79.659	DIADS(0.494)QPMS(0.253)APVAS(0.253)K	2	0.59782
sp|Q9UKD1|GMEB2_HUMAN Glucocorticoid modulatory element-binding protein 2 OS=Homo sapiens OX=9606 GN=GMEB2 PE=1 SV=1	Q9UKD1	403	72.243	VVS(0.457)T(0.457)LPS(0.085)TVLGK	2	0.016673
sp|Q9UKX3|MYH13_HUMAN Myosin-13 OS=Homo sapiens OX=9606 GN=MYH13 PE=2 SV=2	Q9UKX3	1554	41.208	LVEQEKS(0.041)DLQVALEEVEGS(0.982)LEHEES(0.977)K	3	-1.2523
sp|Q9UKX3|MYH13_HUMAN Myosin-13 OS=Homo sapiens OX=9606 GN=MYH13 PE=2 SV=2	Q9UKX3	1560	41.208	LVEQEKS(0.041)DLQVALEEVEGS(0.982)LEHEES(0.977)K	3	-1.2523
sp|Q9UKY1|ZHX1_HUMAN Zinc fingers and homeoboxes protein 1 OS=Homo sapiens OX=9606 GN=ZHX1 PE=1 SV=1	Q9UKY1	248	45.084	IHPS(0.295)T(0.029)AS(0.345)T(0.016)VVT(0.109)PAAVLPGLAQVIT(0.025)AVS(0.13)AQQNS(0.052)NLIPK	4	-0.98026
sp|Q9UKY1|ZHX1_HUMAN Zinc fingers and homeoboxes protein 1 OS=Homo sapiens OX=9606 GN=ZHX1 PE=1 SV=1	Q9UKY1	268	48.538	IHPS(0.207)T(0.001)AS(0.22)T(0.001)VVT(0.036)PAAVLPGLAQVIT(0.012)AVS(0.262)AQQNS(0.262)NLIPK	4	0.14853
sp|Q9UKY1|ZHX1_HUMAN Zinc fingers and homeoboxes protein 1 OS=Homo sapiens OX=9606 GN=ZHX1 PE=1 SV=1	Q9UKY1	273	48.538	IHPS(0.207)T(0.001)AS(0.22)T(0.001)VVT(0.036)PAAVLPGLAQVIT(0.012)AVS(0.262)AQQNS(0.262)NLIPK	4	0.14853
sp|Q9ULI4|KI26A_HUMAN Kinesin-like protein KIF26A OS=Homo sapiens OX=9606 GN=KIF26A PE=1 SV=3	Q9ULI4	879	58.433	KPS(0.999)PPEAAS(0.001)PR	2	-0.78415
sp|Q9ULM3|YETS2_HUMAN YEATS domain-containing protein 2 OS=Homo sapiens OX=9606 GN=YEATS2 PE=1 SV=2	Q9ULM3	608	50.803	QEPGEAPHVPAT(0.121)GAAS(0.822)QS(0.057)PLPQYVT(0.001)VK	3	0.36028
sp|Q9ULU4|ZMYD8_HUMAN MYND-type zinc finger-containing chromatin reader ZMYND8 OS=Homo sapiens OX=9606 GN=ZMYND8 PE=1 SV=2	Q9ULU4	749	81.312	T(0.062)PPS(0.651)T(0.021)T(0.026)VGS(0.12)HS(0.12)PPETPVLTR	3	-0.11813
sp|Q9ULU4|ZMYD8_HUMAN MYND-type zinc finger-containing chromatin reader ZMYND8 OS=Homo sapiens OX=9606 GN=ZMYND8 PE=1 SV=2	Q9ULU4	754	55.846	T(0.237)PPS(0.128)T(0.019)T(0.019)VGS(0.488)HS(0.11)PPETPVLTR	3	0.52715
sp|Q9ULU4|ZMYD8_HUMAN MYND-type zinc finger-containing chromatin reader ZMYND8 OS=Homo sapiens OX=9606 GN=ZMYND8 PE=1 SV=2	Q9ULU4	756	64.68	T(0.006)PPS(0.126)T(0.038)T(0.016)VGS(0.406)HS(0.406)PPETPVLT(0.001)R	3	-0.034182
sp|Q9UMR7|CLC4A_HUMAN C-type lectin domain family 4 member A OS=Homo sapiens OX=9606 GN=CLEC4A PE=1 SV=1	Q9UMR7	3	56.359	MTS(1)EIT(1)YAEVR	2	1.5123
sp|Q9UPN6|SCAF8_HUMAN SR-related and CTD-associated factor 8 OS=Homo sapiens OX=9606 GN=SCAF8 PE=1 SV=1	Q9UPN6	617	116.19	ET(0.263)VQT(0.263)T(0.005)QS(0.469)PTPVEK	2	0.064415
sp|Q9UPN6|SCAF8_HUMAN SR-related and CTD-associated factor 8 OS=Homo sapiens OX=9606 GN=SCAF8 PE=1 SV=1	Q9UPN6	604	156.08	S(0.498)S(0.498)EPVKETVQTT(0.001)QS(0.003)PTPVEK	3	0.22729
sp|Q9UPN6|SCAF8_HUMAN SR-related and CTD-associated factor 8 OS=Homo sapiens OX=9606 GN=SCAF8 PE=1 SV=1	Q9UPN6	605	156.08	S(0.498)S(0.498)EPVKETVQTT(0.001)QS(0.003)PTPVEK	3	0.22729
sp|Q9UQ35|SRRM2_HUMAN Serine/arginine repetitive matrix protein 2 OS=Homo sapiens OX=9606 GN=SRRM2 PE=1 SV=2	Q9UQ35	2236	82.483	IPAAS(0.811)AAAMNLAS(0.189)AR	3	0.32882
sp|Q9UQ35|SRRM2_HUMAN Serine/arginine repetitive matrix protein 2 OS=Homo sapiens OX=9606 GN=SRRM2 PE=1 SV=2	Q9UQ35	2244	82.755	IPAAS(0.045)AAAMNLAS(0.955)AR	3	-0.089068
sp|Q9UQ35|SRRM2_HUMAN Serine/arginine repetitive matrix protein 2 OS=Homo sapiens OX=9606 GN=SRRM2 PE=1 SV=2	Q9UQ35	2382	69.716	MAPALS(0.124)GANLTS(0.876)PR	2	0.27279
sp|Q9UQ35|SRRM2_HUMAN Serine/arginine repetitive matrix protein 2 OS=Homo sapiens OX=9606 GN=SRRM2 PE=1 SV=2	Q9UQ35	2325	44.015	TPAALAALS(0.04)LT(0.019)GS(0.089)GT(0.074)PPT(0.028)AANYPS(0.25)S(0.25)S(0.25)R	3	0.2445
sp|Q9UQ35|SRRM2_HUMAN Serine/arginine repetitive matrix protein 2 OS=Homo sapiens OX=9606 GN=SRRM2 PE=1 SV=2	Q9UQ35	2326	44.015	TPAALAALS(0.04)LT(0.019)GS(0.089)GT(0.074)PPT(0.028)AANYPS(0.25)S(0.25)S(0.25)R	3	0.2445
sp|Q9UQ35|SRRM2_HUMAN Serine/arginine repetitive matrix protein 2 OS=Homo sapiens OX=9606 GN=SRRM2 PE=1 SV=2	Q9UQ35	2327	44.015	TPAALAALS(0.04)LT(0.019)GS(0.089)GT(0.074)PPT(0.028)AANYPS(0.25)S(0.25)S(0.25)R	3	0.2445
sp|Q9UQ35|SRRM2_HUMAN Serine/arginine repetitive matrix protein 2 OS=Homo sapiens OX=9606 GN=SRRM2 PE=1 SV=2	Q9UQ35	2335	95.195	T(0.011)PQAPAS(0.989)ANLVGPR	2	0.070645
sp|Q9UQR0|SCML2_HUMAN Sex comb on midleg-like protein 2 OS=Homo sapiens OX=9606 GN=SCML2 PE=1 SV=1	Q9UQR0	568	76.156	NPMYIHTS(0.333)VS(0.333)QDFS(0.333)R	2	-0.61999
sp|Q9UQR0|SCML2_HUMAN Sex comb on midleg-like protein 2 OS=Homo sapiens OX=9606 GN=SCML2 PE=1 SV=1	Q9UQR0	570	76.156	NPMYIHTS(0.333)VS(0.333)QDFS(0.333)R	2	-0.61999
sp|Q9UQR0|SCML2_HUMAN Sex comb on midleg-like protein 2 OS=Homo sapiens OX=9606 GN=SCML2 PE=1 SV=1	Q9UQR0	574	76.156	NPMYIHTS(0.333)VS(0.333)QDFS(0.333)R	2	-0.61999
sp|Q9Y2J4|AMOL2_HUMAN Angiomotin-like protein 2 OS=Homo sapiens OX=9606 GN=AMOTL2 PE=1 SV=3	Q9Y2J4	7	110.38	RTLEDS(0.997)S(0.002)GT(0.001)VLHR	2	1.5801
sp|Q9Y3Q4|HCN4_HUMAN Potassium/sodium hyperpolarization-activated cyclic nucleotide-gated channel 4 OS=Homo sapiens OX=9606 GN=HCN4 PE=1 SV=1	Q9Y3Q4	7	41.029	MDKLPPS(1)MR	2	0.2036
sp|Q9Y490|TLN1_HUMAN Talin-1 OS=Homo sapiens OX=9606 GN=TLN1 PE=1 SV=3	Q9Y490	630	71.221	S(0.011)AQPAS(0.989)AEPR	1	0.075995
sp|Q9Y4B4|ARIP4_HUMAN Helicase ARIP4 OS=Homo sapiens OX=9606 GN=RAD54L2 PE=1 SV=4	Q9Y4B4	1084	59.281	VVT(0.002)T(0.009)T(0.206)DIVIPGLNS(0.388)S(0.388)T(0.006)DVQAR	2	1.1914
sp|Q9Y4B4|ARIP4_HUMAN Helicase ARIP4 OS=Homo sapiens OX=9606 GN=RAD54L2 PE=1 SV=4	Q9Y4B4	1085	59.281	VVT(0.002)T(0.009)T(0.206)DIVIPGLNS(0.388)S(0.388)T(0.006)DVQAR	2	1.1914
sp|Q9Y520|PRC2C_HUMAN Protein PRRC2C OS=Homo sapiens OX=9606 GN=PRRC2C PE=1 SV=4	Q9Y520	2694	91.307	ATS(0.004)T(0.033)S(0.366)PNS(0.366)QS(0.115)S(0.115)K	2	0.7357
sp|Q9Y520|PRC2C_HUMAN Protein PRRC2C OS=Homo sapiens OX=9606 GN=PRRC2C PE=1 SV=4	Q9Y520	2697	91.307	ATS(0.004)T(0.033)S(0.366)PNS(0.366)QS(0.115)S(0.115)K	2	0.7357
sp|Q9Y520|PRC2C_HUMAN Protein PRRC2C OS=Homo sapiens OX=9606 GN=PRRC2C PE=1 SV=4	Q9Y520	2700	132.14	ATST(0.028)S(0.02)PNS(0.05)QS(0.188)S(0.714)K	2	-0.27923
sp|Q9Y5J3|HEY1_HUMAN Hairy/enhancer-of-split related with YRPW motif protein 1 OS=Homo sapiens OX=9606 GN=HEY1 PE=1 SV=1	Q9Y5J3	234	79.837	APPS(0.273)GS(0.273)LGPVLPVVTS(0.273)AS(0.182)K	2	-0.38457
sp|Q9Y5J3|HEY1_HUMAN Hairy/enhancer-of-split related with YRPW motif protein 1 OS=Homo sapiens OX=9606 GN=HEY1 PE=1 SV=1	Q9Y5J3	236	79.837	APPS(0.273)GS(0.273)LGPVLPVVTS(0.273)AS(0.182)K	2	-0.38457
sp|Q9Y5J3|HEY1_HUMAN Hairy/enhancer-of-split related with YRPW motif protein 1 OS=Homo sapiens OX=9606 GN=HEY1 PE=1 SV=1	Q9Y5J3	246	79.837	APPS(0.102)GS(0.102)LGPVLPVVTS(0.398)AS(0.398)K	2	-1.4076
sp|Q9Y5J3|HEY1_HUMAN Hairy/enhancer-of-split related with YRPW motif protein 1 OS=Homo sapiens OX=9606 GN=HEY1 PE=1 SV=1	Q9Y5J3	248	77.13	APPS(0.102)GS(0.102)LGPVLPVVTS(0.398)AS(0.398)K	2	-1.4076
sp|A5YKK6|CNOT1_HUMAN CCR4-NOT transcription complex subunit 1 OS=Homo sapiens OX=9606 GN=CNOT1 PE=1 SV=2	A5YKK6	1467	46.404	NLT(0.004)AGMAMIT(0.152)CREPLLMS(0.223)IS(0.806)T(0.815)NLK	4	-0.7916
sp|A6NNC1|P12LL_HUMAN Putative POM121-like protein 1-like OS=Homo sapiens OX=9606 PE=5 SV=3	A6NNC1	582	45.696	DS(0.122)AQVT(0.01)S(0.122)LIPAT(0.659)FT(0.085)AAS(0.001)RDAGMR	3	1.6699
sp|A8CG34|P121C_HUMAN Nuclear envelope pore membrane protein POM 121C OS=Homo sapiens OX=9606 GN=POM121C PE=1 SV=3;sp|Q96HA1|P121A_HUMAN Nuclear envelope pore membrane protein POM 121 OS=Homo sapiens OX=9606 GN=POM121 PE=1 SV=2	A8CG34;Q96HA1	658;681	80.314	APPT(0.894)LQAET(0.017)AT(0.016)KPQATS(0.04)APS(0.032)PAPK	3	0.85522
sp|A8CG34|P121C_HUMAN Nuclear envelope pore membrane protein POM 121C OS=Homo sapiens OX=9606 GN=POM121C PE=1 SV=3;sp|Q96HA1|P121A_HUMAN Nuclear envelope pore membrane protein POM 121 OS=Homo sapiens OX=9606 GN=POM121 PE=1 SV=2	A8CG34;Q96HA1	663;686	102.66	APPT(0.083)LQAET(0.696)AT(0.072)KPQATS(0.089)APS(0.061)PAPK	3	0.014204
sp|A8CG34|P121C_HUMAN Nuclear envelope pore membrane protein POM 121C OS=Homo sapiens OX=9606 GN=POM121C PE=1 SV=3;sp|Q96HA1|P121A_HUMAN Nuclear envelope pore membrane protein POM 121 OS=Homo sapiens OX=9606 GN=POM121 PE=1 SV=2	A8CG34;Q96HA1	665;688	142.54	APPT(0.002)LQAET(0.455)AT(0.896)KPQAT(0.342)S(0.185)APS(0.12)PAPK	2	-0.14334
sp|A8CG34|P121C_HUMAN Nuclear envelope pore membrane protein POM 121C OS=Homo sapiens OX=9606 GN=POM121C PE=1 SV=3;sp|Q96HA1|P121A_HUMAN Nuclear envelope pore membrane protein POM 121 OS=Homo sapiens OX=9606 GN=POM121 PE=1 SV=2	A8CG34;Q96HA1	670;693	104.95	APPTLQAETATKPQAT(0.861)S(0.861)APS(0.278)PAPK	2	-1.0215
sp|A8CG34|P121C_HUMAN Nuclear envelope pore membrane protein POM 121C OS=Homo sapiens OX=9606 GN=POM121C PE=1 SV=3	A8CG34	973	40.545	PALT(0.032)PS(0.186)FGS(0.186)S(0.186)FT(0.186)FGNS(0.186)AAPAPAT(0.03)APT(0.001)PAPAS(0.008)TIK	3	0.55381
sp|A8CG34|P121C_HUMAN Nuclear envelope pore membrane protein POM 121C OS=Homo sapiens OX=9606 GN=POM121C PE=1 SV=3	A8CG34	984	48.697	PALT(0.003)PS(0.082)FGS(0.082)S(0.082)FT(0.082)FGNS(0.078)AAPAPAT(0.482)APT(0.026)PAPAS(0.084)TIK	3	0.45042
sp|E9PAV3|NACAM_HUMAN Nascent polypeptide-associated complex subunit alpha, muscle-specific form OS=Homo sapiens OX=9606 GN=NACA PE=1 SV=1	E9PAV3	1188	43.164	GAPT(0.005)T(0.012)PAAT(0.056)PPS(0.034)PKGGLAT(0.447)PS(0.447)PK	3	0.43333
sp|O00268|TAF4_HUMAN Transcription initiation factor TFIID subunit 4 OS=Homo sapiens OX=9606 GN=TAF4 PE=1 SV=2	O00268	709	40.142	T(0.269)AAT(0.239)VT(0.239)S(0.239)ALQPPVLS(0.012)LT(0.002)QPTQVGVGK	3	-0.10232
sp|O00268|TAF4_HUMAN Transcription initiation factor TFIID subunit 4 OS=Homo sapiens OX=9606 GN=TAF4 PE=1 SV=2	O00268	712	49.765	T(0.047)AAT(0.588)VT(0.162)S(0.162)ALQPPVLS(0.041)LTQPTQVGVGK	3	0.44112
sp|O00268|TAF4_HUMAN Transcription initiation factor TFIID subunit 4 OS=Homo sapiens OX=9606 GN=TAF4 PE=1 SV=2	O00268	714	46.892	T(0.011)AAT(0.036)VT(0.723)S(0.205)ALQPPVLS(0.026)LTQPTQVGVGK	2	0.72554
sp|O00370|LORF2_HUMAN LINE-1 retrotransposable element ORF2 protein OS=Homo sapiens OX=9606 PE=1 SV=1	O00370	1192	46.926	DT(0.535)CT(0.465)RMFIAALFT(1)IAK	3	-1.9561
sp|O00370|LORF2_HUMAN LINE-1 retrotransposable element ORF2 protein OS=Homo sapiens OX=9606 PE=1 SV=1	O00370	1194	52.008	DT(0.062)CT(0.938)RMFIAALFT(1)IAK	3	-2.1691
sp|O00370|LORF2_HUMAN LINE-1 retrotransposable element ORF2 protein OS=Homo sapiens OX=9606 PE=1 SV=1	O00370	1203	52.008	DT(0.062)CT(0.938)RMFIAALFT(1)IAK	3	-2.1691
sp|O14497|ARI1A_HUMAN AT-rich interactive domain-containing protein 1A OS=Homo sapiens OX=9606 GN=ARID1A PE=1 SV=3	O14497	238	65.134	GGT(0.856)PGS(0.058)GAAAAAGS(0.048)KPPPS(0.01)S(0.01)S(0.008)AS(0.002)AS(0.002)S(0.002)S(0.002)S(0.002)S(0.002)S(0.002)FAQQR	4	0.69385
sp|O14497|ARI1A_HUMAN AT-rich interactive domain-containing protein 1A OS=Homo sapiens OX=9606 GN=ARID1A PE=1 SV=3	O14497	118	56.265	PALNNNLT(0.97)EPPGGGGGGS(0.01)S(0.01)DGVGAPPHS(0.009)AAAALPPPAYGFGQPYGR	4	-0.65074
sp|O14974|MYPT1_HUMAN Protein phosphatase 1 regulatory subunit 12A OS=Homo sapiens OX=9606 GN=PPP1R12A PE=1 SV=1	O14974	570	47.577	RQDDLIS(0.06)S(0.17)S(0.172)VPS(0.114)T(0.308)T(0.324)S(0.151)T(0.289)PT(0.181)VT(0.165)S(0.066)AAGLQK	3	0.37109
sp|O14974|MYPT1_HUMAN Protein phosphatase 1 regulatory subunit 12A OS=Homo sapiens OX=9606 GN=PPP1R12A PE=1 SV=1	O14974	571	45.901	RQDDLIS(0.06)S(0.17)S(0.172)VPS(0.114)T(0.308)T(0.324)S(0.151)T(0.289)PT(0.181)VT(0.165)S(0.066)AAGLQK	3	0.37109
sp|O14974|MYPT1_HUMAN Protein phosphatase 1 regulatory subunit 12A OS=Homo sapiens OX=9606 GN=PPP1R12A PE=1 SV=1	O14974	573	45.703	RQDDLIS(0.297)S(0.115)S(0.118)VPS(0.094)T(0.197)T(0.35)S(0.232)T(0.335)PT(0.135)VT(0.039)S(0.088)AAGLQK	3	-0.22662
sp|O14974|MYPT1_HUMAN Protein phosphatase 1 regulatory subunit 12A OS=Homo sapiens OX=9606 GN=PPP1R12A PE=1 SV=1	O14974	575	43.732	RQDDLIS(0.104)S(0.104)S(0.053)VPS(0.028)T(0.028)T(0.058)S(0.074)T(0.061)PT(0.248)VT(0.029)S(0.212)AAGLQK	3	0.14986
sp|O14974|MYPT1_HUMAN Protein phosphatase 1 regulatory subunit 12A OS=Homo sapiens OX=9606 GN=PPP1R12A PE=1 SV=1	O14974	396	42.269	T(0.011)KPLAS(0.007)VT(0.013)NANT(0.047)S(0.047)S(0.185)T(0.185)QAAPVAVT(0.233)T(0.065)PT(0.021)VS(0.024)S(0.08)GQAT(0.001)PTS(0.08)PIK	3	-0.8322
sp|O15164|TIF1A_HUMAN Transcription intermediary factor 1-alpha OS=Homo sapiens OX=9606 GN=TRIM24 PE=1 SV=3	O15164	577	55.702	QWQIS(0.056)S(0.157)GQGT(0.376)PS(0.314)T(0.315)T(0.315)NS(0.251)T(0.072)S(0.072)S(0.023)T(0.02)PS(0.008)S(0.008)PT(0.007)IT(0.001)S(0.006)AAGYDGK	3	-0.11046
sp|O15164|TIF1A_HUMAN Transcription intermediary factor 1-alpha OS=Homo sapiens OX=9606 GN=TRIM24 PE=1 SV=3	O15164	580	55.702	QWQIS(0.056)S(0.157)GQGT(0.376)PS(0.314)T(0.315)T(0.315)NS(0.251)T(0.072)S(0.072)S(0.023)T(0.02)PS(0.008)S(0.008)PT(0.007)IT(0.001)S(0.006)AAGYDGK	3	-0.11046
sp|O15164|TIF1A_HUMAN Transcription intermediary factor 1-alpha OS=Homo sapiens OX=9606 GN=TRIM24 PE=1 SV=3	O15164	581	55.702	QWQIS(0.056)S(0.157)GQGT(0.376)PS(0.314)T(0.315)T(0.315)NS(0.251)T(0.072)S(0.072)S(0.023)T(0.02)PS(0.008)S(0.008)PT(0.007)IT(0.001)S(0.006)AAGYDGK	3	-0.11046
sp|O15164|TIF1A_HUMAN Transcription intermediary factor 1-alpha OS=Homo sapiens OX=9606 GN=TRIM24 PE=1 SV=3	O15164	584	53.819	QWQIS(0.053)S(0.053)GQGT(0.056)PS(0.207)T(0.211)T(0.211)NS(0.208)T(0.215)S(0.208)S(0.208)T(0.209)PS(0.066)S(0.05)PT(0.012)IT(0.001)S(0.034)AAGYDGK	3	0.53028
sp|O15164|TIF1A_HUMAN Transcription intermediary factor 1-alpha OS=Homo sapiens OX=9606 GN=TRIM24 PE=1 SV=3	O15164	587	53.819	QWQIS(0.053)S(0.053)GQGT(0.056)PS(0.207)T(0.211)T(0.211)NS(0.208)T(0.215)S(0.208)S(0.208)T(0.209)PS(0.066)S(0.05)PT(0.012)IT(0.001)S(0.034)AAGYDGK	3	0.53028
sp|O15553|MEFV_HUMAN Pyrin OS=Homo sapiens OX=9606 GN=MEFV PE=1 SV=1	O15553	548	89.55	WT(1)T(1)PQEIK	2	0.38089
sp|O15553|MEFV_HUMAN Pyrin OS=Homo sapiens OX=9606 GN=MEFV PE=1 SV=1	O15553	549	89.55	WT(1)T(1)PQEIK	2	0.38089
sp|O43157|PLXB1_HUMAN Plexin-B1 OS=Homo sapiens OX=9606 GN=PLXNB1 PE=1 SV=3	O43157	1978	53.567	T(1)NS(1)LPLRFWINIIK	2	-0.26258
sp|O43303|CP110_HUMAN Centriolar coiled-coil protein of 110 kDa OS=Homo sapiens OX=9606 GN=CCP110 PE=1 SV=3	O43303	830	48.761	DT(1)MEFIR	1	1.0232
sp|O43432|IF4G3_HUMAN Eukaryotic translation initiation factor 4 gamma 3 OS=Homo sapiens OX=9606 GN=EIF4G3 PE=1 SV=2	O43432	278	44.863	S(0.413)T(0.413)IAAPT(0.111)S(0.032)S(0.012)ALS(0.009)S(0.009)QPIFTTAIDDR	3	-0.53043
sp|O43432|IF4G3_HUMAN Eukaryotic translation initiation factor 4 gamma 3 OS=Homo sapiens OX=9606 GN=EIF4G3 PE=1 SV=2	O43432	283	46.319	S(0.272)T(0.272)IAAPT(0.312)S(0.068)S(0.068)ALS(0.005)S(0.005)QPIFTTAIDDR	2	-0.62175
sp|Q99909|SSX3_HUMAN Protein SSX3 OS=Homo sapiens OX=9606 GN=SSX3 PE=1 SV=2;sp|Q7RTT6|SSX6_HUMAN Putative protein SSX6 OS=Homo sapiens OX=9606 GN=SSX6P PE=5 SV=1;sp|Q7RTT5|SSX7_HUMAN Protein SSX7 OS=Homo sapiens OX=9606 GN=SSX7 PE=1 SV=1;sp|Q7RTT3|SSX9_HUM	Q99909;Q7RTT6;Q7RTT5;Q7RTT3;Q16385;O60225	59;59;59;59;59;59	81.191	KYEAMT(1)K	2	-1.556
sp|O60942|MCE1_HUMAN mRNA-capping enzyme OS=Homo sapiens OX=9606 GN=RNGTT PE=1 SV=1	O60942	582	40.577	KHHLDPDT(1)ELMPPPPPK	2	-2.1328
sp|O75030|MITF_HUMAN Microphthalmia-associated transcription factor OS=Homo sapiens OX=9606 GN=MITF PE=1 SV=2	O75030	104	40.208	VPVS(0.024)QT(0.002)PAINVS(0.274)VPT(0.274)T(0.274)LPS(0.112)AT(0.039)QVPMEVLK	4	0.11527
sp|O75030|MITF_HUMAN Microphthalmia-associated transcription factor OS=Homo sapiens OX=9606 GN=MITF PE=1 SV=2	O75030	105	50.986	VPVS(0.003)QT(0.001)PAINVS(0.119)VPT(0.119)T(0.467)LPS(0.146)AT(0.146)QVPMEVLK	3	0.22849
sp|O75069|TMCC2_HUMAN Transmembrane and coiled-coil domains protein 2 OS=Homo sapiens OX=9606 GN=TMCC2 PE=1 SV=3	O75069	417	41.871	GS(0.275)LS(0.286)GLS(0.272)QAT(0.654)HT(0.191)AVVS(0.321)KPR	2	1.4572
sp|O75069|TMCC2_HUMAN Transmembrane and coiled-coil domains protein 2 OS=Homo sapiens OX=9606 GN=TMCC2 PE=1 SV=3	O75069	419	46.592	GS(0.022)LS(0.022)GLS(0.029)QAT(0.052)HT(0.947)AVVS(0.929)KPR	2	1.5395
sp|O75128|COBL_HUMAN Protein cordon-bleu OS=Homo sapiens OX=9606 GN=COBL PE=1 SV=2	O75128	855	71.933	VPAAHT(0.322)T(0.322)EVT(0.355)FLKPQR	3	-4.0697
sp|O75179|ANR17_HUMAN Ankyrin repeat domain-containing protein 17 OS=Homo sapiens OX=9606 GN=ANKRD17 PE=1 SV=3	O75179	1824	60.401	IGS(0.248)S(0.248)APT(0.37)T(0.067)T(0.013)AANTS(0.054)LMGIK	2	1.0638
sp|O75179|ANR17_HUMAN Ankyrin repeat domain-containing protein 17 OS=Homo sapiens OX=9606 GN=ANKRD17 PE=1 SV=3	O75179	2001	105.2	QLFVT(1)VVK	2	0.79855
sp|O75376|NCOR1_HUMAN Nuclear receptor corepressor 1 OS=Homo sapiens OX=9606 GN=NCOR1 PE=1 SV=2	O75376	2072	57.21	NQVS(0.322)S(0.322)QT(0.322)PQQPPT(0.016)S(0.016)T(0.002)FQNSPSALVSTPVR	3	-0.14467
sp|O75376|NCOR1_HUMAN Nuclear receptor corepressor 1 OS=Homo sapiens OX=9606 GN=NCOR1 PE=1 SV=2	O75376	2080	55.158	NQVS(0.102)S(0.03)QT(0.016)PQQPPT(0.047)S(0.18)T(0.585)FQNS(0.019)PS(0.011)ALVS(0.01)T(0.001)PVR	3	-0.61564
sp|O75843|AP1G2_HUMAN AP-1 complex subunit gamma-like 2 OS=Homo sapiens OX=9606 GN=AP1G2 PE=1 SV=1	O75843	422	43.261	RWHIDT(0.997)ILHVLT(0.001)TAGT(0.001)HVR	3	0.19812
sp|O94842|TOX4_HUMAN TOX high mobility group box family member 4 OS=Homo sapiens OX=9606 GN=TOX4 PE=1 SV=1	O94842	405	124.5	GLQLGQT(0.791)S(0.152)T(0.03)AT(0.001)IQPS(0.026)QQAQIVTR	2	0.43718
sp|O94842|TOX4_HUMAN TOX high mobility group box family member 4 OS=Homo sapiens OX=9606 GN=TOX4 PE=1 SV=1	O94842	407	79.652	GLQLGQT(0.15)S(0.229)T(0.356)AT(0.229)IQPS(0.035)QQAQIVTR	2	3.0995
sp|O95210|STBD1_HUMAN Starch-binding domain-containing protein 1 OS=Homo sapiens OX=9606 GN=STBD1 PE=1 SV=1	O95210	317	40.428	DGFWS(0.012)HS(0.012)IFLPADT(0.933)VVEWKFVLVENGGVT(0.044)R	4	2.3381
sp|O95487|SC24B_HUMAN Protein transport protein Sec24B OS=Homo sapiens OX=9606 GN=SEC24B PE=1 SV=2	O95487	344	97.776	TPPTANHPVEPVT(0.013)S(0.129)VT(0.757)QPS(0.101)ELLQQK	3	0.086343
sp|O96001|PPR17_HUMAN Protein phosphatase 1 regulatory subunit 17 OS=Homo sapiens OX=9606 GN=PPP1R17 PE=1 SV=2	O96001	4	42.78	MMS(0.21)T(0.765)EQMQPLELS(0.025)EDRLDK	4	-1.0504
sp|P01011|AACT_HUMAN Alpha-1-antichymotrypsin OS=Homo sapiens OX=9606 GN=SERPINA3 PE=1 SV=2	P01011	226	53.946	AKWEMPFDPQDT(0.899)HQS(0.101)R	3	-1.0506
sp|P04040|CATA_HUMAN Catalase OS=Homo sapiens OX=9606 GN=CAT PE=1 SV=3	P04040	58	48.899	GPLLVQDVVFT(1)DEMAHFDR	3	-1.748
sp|P05155|IC1_HUMAN Plasma protease C1 inhibitor OS=Homo sapiens OX=9606 GN=SERPING1 PE=1 SV=2	P05155	47	73.975	VAT(0.879)T(0.977)VIS(0.144)K	3	4.3764
sp|P05155|IC1_HUMAN Plasma protease C1 inhibitor OS=Homo sapiens OX=9606 GN=SERPING1 PE=1 SV=2	P05155	48	73.975	VAT(0.879)T(0.977)VIS(0.144)K	3	4.3764
sp|P05556|ITB1_HUMAN Integrin beta-1 OS=Homo sapiens OX=9606 GN=ITGB1 PE=1 SV=2	P05556	408	76.064	NGVNGT(1)GENGRK	2	-0.85593
sp|P10828|THB_HUMAN Thyroid hormone receptor beta OS=Homo sapiens OX=9606 GN=THRB PE=1 SV=2	P10828	12	49.28	MTPNS(0.002)MT(0.008)ENGLT(0.99)AWDK	2	1.2744
sp|P11441|UBL4A_HUMAN Ubiquitin-like protein 4A OS=Homo sapiens OX=9606 GN=UBL4A PE=1 SV=1	P11441	131	57.103	LT(1)LDDIER	1	0.45544
sp|P12270|TPR_HUMAN Nucleoprotein TPR OS=Homo sapiens OX=9606 GN=TPR PE=1 SV=3	P12270	1661	55.097	GIAS(0.115)T(0.358)S(0.358)DPPT(0.101)ANIKPT(0.001)PVVS(0.034)TPS(0.034)K	3	0.061389
sp|P14314|GLU2B_HUMAN Glucosidase 2 subunit beta OS=Homo sapiens OX=9606 GN=PRKCSH PE=1 SV=2	P14314	287	109.95	S(0.009)EALPT(0.982)DLPAPS(0.009)APDLTEPK	2	0.49625
sp|P17947|SPI1_HUMAN Transcription factor PU.1 OS=Homo sapiens OX=9606 GN=SPI1 PE=1 SV=2	P17947	198	43.246	GT(0.968)FQFS(0.016)S(0.016)K	1	-0.26611
sp|P18846|ATF1_HUMAN Cyclic AMP-dependent transcription factor ATF-1 OS=Homo sapiens OX=9606 GN=ATF1 PE=1 SV=2	P18846	183	71.697	T(0.222)T(0.222)PS(0.19)AT(0.163)S(0.163)LPQT(0.013)VVMT(0.009)S(0.009)PVTLTS(0.009)QTTK	2	-0.64908
sp|P18846|ATF1_HUMAN Cyclic AMP-dependent transcription factor ATF-1 OS=Homo sapiens OX=9606 GN=ATF1 PE=1 SV=2	P18846	184	71.697	T(0.222)T(0.222)PS(0.19)AT(0.163)S(0.163)LPQT(0.013)VVMT(0.009)S(0.009)PVTLTS(0.009)QTTK	2	-0.64908
sp|P18846|ATF1_HUMAN Cyclic AMP-dependent transcription factor ATF-1 OS=Homo sapiens OX=9606 GN=ATF1 PE=1 SV=2	P18846	188	59.434	T(0.195)T(0.195)PS(0.195)AT(0.195)S(0.195)LPQT(0.02)VVMTS(0.003)PVTLTS(0.003)QTTK	2	0.024619
sp|P18846|ATF1_HUMAN Cyclic AMP-dependent transcription factor ATF-1 OS=Homo sapiens OX=9606 GN=ATF1 PE=1 SV=2	P18846	193	50.498	T(0.114)T(0.114)PS(0.124)AT(0.124)S(0.124)LPQT(0.372)VVMT(0.004)S(0.013)PVTLTS(0.013)QTTK	3	-0.059982
sp|P22670|RFX1_HUMAN MHC class II regulatory factor RFX1 OS=Homo sapiens OX=9606 GN=RFX1 PE=1 SV=2	P22670	225	51.46	T(0.007)AGAPT(0.495)GT(0.495)VPQQLQVHGVQQS(0.004)VPVTQER	3	0.13023
sp|P22670|RFX1_HUMAN MHC class II regulatory factor RFX1 OS=Homo sapiens OX=9606 GN=RFX1 PE=1 SV=2	P22670	227	51.46	T(0.007)AGAPT(0.495)GT(0.495)VPQQLQVHGVQQS(0.004)VPVTQER	3	0.13023
sp|P22792|CPN2_HUMAN Carboxypeptidase N subunit 2 OS=Homo sapiens OX=9606 GN=CPN2 PE=1 SV=3	P22792	326	44.105	S(0.003)LMLS(0.113)YNAIT(0.884)HLPAGIFRDLEELVK	3	-4.3142
sp|P35658|NU214_HUMAN Nuclear pore complex protein Nup214 OS=Homo sapiens OX=9606 GN=NUP214 PE=1 SV=2	P35658	1355	88.134	AS(0.029)S(0.146)T(0.771)S(0.029)LTS(0.026)TQPTK	2	0.3716
sp|P35658|NU214_HUMAN Nuclear pore complex protein Nup214 OS=Homo sapiens OX=9606 GN=NUP214 PE=1 SV=2	P35658	592	43.208	FT(0.237)AAAT(0.182)S(0.182)T(0.182)PVS(0.059)S(0.059)S(0.059)QS(0.009)APPMS(0.008)PFS(0.008)S(0.008)AS(0.008)K	2	0.55945
sp|P35658|NU214_HUMAN Nuclear pore complex protein Nup214 OS=Homo sapiens OX=9606 GN=NUP214 PE=1 SV=2	P35658	596	85.176	FT(0.005)AAAT(0.424)S(0.424)T(0.117)PVS(0.017)S(0.004)S(0.004)QS(0.003)APPMSPFSSASK	3	0.67256
sp|P35658|NU214_HUMAN Nuclear pore complex protein Nup214 OS=Homo sapiens OX=9606 GN=NUP214 PE=1 SV=2	P35658	598	85.176	FTAAAT(0.02)S(0.402)T(0.402)PVS(0.005)S(0.005)S(0.005)QS(0.005)APPMS(0.039)PFS(0.039)S(0.039)AS(0.039)K	2	0.33218
sp|P35658|NU214_HUMAN Nuclear pore complex protein Nup214 OS=Homo sapiens OX=9606 GN=NUP214 PE=1 SV=2	P35658	1201	118.87	IET(0.001)AVT(0.874)S(0.052)TPS(0.052)AS(0.009)GQFS(0.012)K	2	-0.16255
sp|P35658|NU214_HUMAN Nuclear pore complex protein Nup214 OS=Homo sapiens OX=9606 GN=NUP214 PE=1 SV=2	P35658	1553	40.907	KEPVLAQPAVS(0.138)NS(0.138)GT(0.138)AAS(0.138)S(0.138)T(0.138)S(0.138)LVALS(0.031)AEAT(0.001)PATTGVPDAR	3	0.37257
sp|P35658|NU214_HUMAN Nuclear pore complex protein Nup214 OS=Homo sapiens OX=9606 GN=NUP214 PE=1 SV=2	P35658	1558	48.943	KEPVLAQPAVS(0.032)NS(0.074)GT(0.074)AAS(0.074)S(0.219)T(0.219)S(0.219)LVALS(0.088)AEAT(0.001)PATTGVPDAR	3	-0.68977
sp|P35658|NU214_HUMAN Nuclear pore complex protein Nup214 OS=Homo sapiens OX=9606 GN=NUP214 PE=1 SV=2	P35658	1134	124.12	NNPAT(0.831)PS(0.035)TAMGS(0.024)S(0.086)VPYS(0.024)TAK	2	-0.35434
sp|P35658|NU214_HUMAN Nuclear pore complex protein Nup214 OS=Homo sapiens OX=9606 GN=NUP214 PE=1 SV=2	P35658	1137	107.65	NNPAT(0.021)PS(0.442)T(0.442)AMGS(0.019)S(0.019)VPYS(0.056)TAK	2	0.21068
sp|P35658|NU214_HUMAN Nuclear pore complex protein Nup214 OS=Homo sapiens OX=9606 GN=NUP214 PE=1 SV=2	P35658	496	55.66	S(0.14)S(0.14)AT(0.205)VT(0.364)GEPPS(0.029)YS(0.029)S(0.029)GS(0.025)DS(0.019)S(0.019)K	2	-0.41397
sp|P36537|UDB10_HUMAN UDP-glucuronosyltransferase 2B10 OS=Homo sapiens OX=9606 GN=UGT2B10 PE=1 SV=1	P36537	244	75.213	PT(0.002)T(0.821)LS(0.177)ET(1)MR	2	-2.1733
sp|P36537|UDB10_HUMAN UDP-glucuronosyltransferase 2B10 OS=Homo sapiens OX=9606 GN=UGT2B10 PE=1 SV=1	P36537	248	75.213	PT(0.002)T(0.821)LS(0.177)ET(1)MR	2	-2.1733
sp|P37198|NUP62_HUMAN Nuclear pore glycoprotein p62 OS=Homo sapiens OX=9606 GN=NUP62 PE=1 SV=3	P37198	13	43.69	S(0.062)GFNFGGT(0.01)GAPT(0.444)GGFT(0.444)FGT(0.039)AK	2	-0.64836
sp|P37198|NUP62_HUMAN Nuclear pore glycoprotein p62 OS=Homo sapiens OX=9606 GN=NUP62 PE=1 SV=3	P37198	17	43.69	S(0.062)GFNFGGT(0.01)GAPT(0.444)GGFT(0.444)FGT(0.039)AK	2	-0.64836
sp|P39059|COFA1_HUMAN Collagen alpha-1(XV) chain OS=Homo sapiens OX=9606 GN=COL15A1 PE=1 SV=2	P39059	27	41.45	RNNGQCWCLLMLLS(0.716)VS(0.216)T(0.075)PLPAVT(0.496)QT(0.496)R	3	1.9937
sp|P39059|COFA1_HUMAN Collagen alpha-1(XV) chain OS=Homo sapiens OX=9606 GN=COL15A1 PE=1 SV=2	P39059	29	41.45	RNNGQCWCLLMLLS(0.716)VS(0.216)T(0.075)PLPAVT(0.496)QT(0.496)R	3	1.9937
sp|P43243|MATR3_HUMAN Matrin-3 OS=Homo sapiens OX=9606 GN=MATR3 PE=1 SV=2	P43243	33	99.927	DLS(0.052)AAGIGLLAAAT(0.638)QS(0.244)LS(0.038)MPAS(0.028)LGR	2	0.33579
sp|P46597|ASMT_HUMAN Acetylserotonin O-methyltransferase OS=Homo sapiens OX=9606 GN=ASMT PE=1 SV=1	P46597	112	47.657	YMGRT(0.918)S(0.082)YR	1	1.2486
sp|P48634|PRC2A_HUMAN Protein PRRC2A OS=Homo sapiens OX=9606 GN=PRRC2A PE=1 SV=3	P48634	959	86.113	KPPPPT(1)K	2	0.90575
sp|P48735|IDHP_HUMAN Isocitrate dehydrogenase [NADP], mitochondrial OS=Homo sapiens OX=9606 GN=IDH2 PE=1 SV=2	P48735	104	55.815	DQTDDQVT(0.003)IDS(0.499)ALAT(0.499)QK	3	-1.3676
sp|P49336|CDK8_HUMAN Cyclin-dependent kinase 8 OS=Homo sapiens OX=9606 GN=CDK8 PE=1 SV=1	P49336	410	64.945	VVPPT(0.52)T(0.033)T(0.008)S(0.219)GGLIMT(0.001)S(0.219)DYQR	2	0.18753
sp|P49336|CDK8_HUMAN Cyclin-dependent kinase 8 OS=Homo sapiens OX=9606 GN=CDK8 PE=1 SV=1	P49336	411	47.113	VVPPT(0.317)T(0.317)T(0.117)S(0.189)GGLIMT(0.004)S(0.057)DYQR	3	-0.076162
sp|P49336|CDK8_HUMAN Cyclin-dependent kinase 8 OS=Homo sapiens OX=9606 GN=CDK8 PE=1 SV=1	P49336	412	56.121	VVPPT(0.1)T(0.296)T(0.419)S(0.173)GGLIMT(0.001)S(0.012)DYQR	3	-0.050825
sp|P49790|NU153_HUMAN Nuclear pore complex protein Nup153 OS=Homo sapiens OX=9606 GN=NUP153 PE=1 SV=2	P49790	890	92.457	GFDT(0.826)S(0.131)S(0.021)S(0.003)S(0.003)S(0.003)NS(0.003)AAS(0.004)S(0.004)S(0.004)FK	2	0.3101
sp|P49790|NU153_HUMAN Nuclear pore complex protein Nup153 OS=Homo sapiens OX=9606 GN=NUP153 PE=1 SV=2	P49790	480	49.937	IS(0.025)LPIT(0.262)S(0.262)S(0.262)S(0.093)LPT(0.031)FNFS(0.013)S(0.013)PEIT(0.013)T(0.013)S(0.006)S(0.002)PS(0.002)PINS(0.001)S(0.001)QALTNK	3	-0.074931
sp|P49790|NU153_HUMAN Nuclear pore complex protein Nup153 OS=Homo sapiens OX=9606 GN=NUP153 PE=1 SV=2	P49790	486	46.25	IS(0.008)LPIT(0.028)S(0.028)S(0.074)S(0.189)LPT(0.189)FNFS(0.189)S(0.089)PEIT(0.089)T(0.044)S(0.044)S(0.022)PS(0.002)PINS(0.001)S(0.001)QALTNK	4	-0.58908
sp|P49790|NU153_HUMAN Nuclear pore complex protein Nup153 OS=Homo sapiens OX=9606 GN=NUP153 PE=1 SV=2	P49790	496	50.224	IS(0.001)LPIT(0.005)S(0.005)S(0.005)S(0.002)LPT(0.005)FNFS(0.005)S(0.005)PEIT(0.177)T(0.208)S(0.208)S(0.208)PS(0.074)PINS(0.048)S(0.048)QALTNK	4	0.31802
sp|P49790|NU153_HUMAN Nuclear pore complex protein Nup153 OS=Homo sapiens OX=9606 GN=NUP153 PE=1 SV=2	P49790	1026	74.662	S(0.12)S(0.12)S(0.104)AGFS(0.104)FGT(0.461)GVINS(0.045)T(0.002)PAPANTIVTS(0.045)ENK	2	-0.35192
sp|P49790|NU153_HUMAN Nuclear pore complex protein Nup153 OS=Homo sapiens OX=9606 GN=NUP153 PE=1 SV=2	P49790	535	78.401	S(1)T(1)EANVLPPSSIGFTFSVPVAK	2	0.41772
sp|P49792|RBP2_HUMAN E3 SUMO-protein ligase RanBP2 OS=Homo sapiens OX=9606 GN=RANBP2 PE=1 SV=2	P49792	1638	95.195	QNQT(0.48)T(0.049)S(0.305)AVS(0.078)T(0.005)PAS(0.027)S(0.027)ETS(0.027)K	2	0.12538
sp|P49848|TAF6_HUMAN Transcription initiation factor TFIID subunit 6 OS=Homo sapiens OX=9606 GN=TAF6 PE=1 SV=1	P49848	587	45.069	LVS(0.104)T(0.373)AT(0.136)T(0.136)APPS(0.209)T(0.007)APS(0.017)GPGS(0.017)VQK	3	-0.32504
sp|P49848|TAF6_HUMAN Transcription initiation factor TFIID subunit 6 OS=Homo sapiens OX=9606 GN=TAF6 PE=1 SV=1	P49848	589	71.031	LVS(0.044)T(0.044)AT(0.447)T(0.447)APPS(0.009)TAPS(0.004)GPGS(0.004)VQK	2	-0.57575
sp|P49848|TAF6_HUMAN Transcription initiation factor TFIID subunit 6 OS=Homo sapiens OX=9606 GN=TAF6 PE=1 SV=1	P49848	590	71.031	LVS(0.069)T(0.002)AT(0.146)T(0.59)APPS(0.083)T(0.001)APS(0.083)GPGS(0.025)VQK	2	-1.1358
sp|P49848|TAF6_HUMAN Transcription initiation factor TFIID subunit 6 OS=Homo sapiens OX=9606 GN=TAF6 PE=1 SV=1	P49848	480	55.453	T(0.486)T(0.486)LT(0.026)IT(0.003)QPRPTLTLSQAPQPGPR	3	0.025251
sp|P49848|TAF6_HUMAN Transcription initiation factor TFIID subunit 6 OS=Homo sapiens OX=9606 GN=TAF6 PE=1 SV=1	P49848	481	61.942	T(0.158)T(0.811)LT(0.029)IT(0.002)QPRPTLTLSQAPQPGPR	3	-0.63921
sp|P51610|HCFC1_HUMAN Host cell factor 1 OS=Homo sapiens OX=9606 GN=HCFC1 PE=1 SV=2	P51610	517	90.15	APVT(0.001)VT(0.612)S(0.387)LPAGVR	2	-0.43077
sp|P51610|HCFC1_HUMAN Host cell factor 1 OS=Homo sapiens OX=9606 GN=HCFC1 PE=1 SV=2	P51610	1485	81.341	AVT(0.5)T(0.407)VT(0.023)QS(0.033)T(0.033)PVPGPS(0.002)VPPPEELQVS(0.001)PGPR	2	-1.0055
sp|P51610|HCFC1_HUMAN Host cell factor 1 OS=Homo sapiens OX=9606 GN=HCFC1 PE=1 SV=2	P51610	1486	81.341	AVT(0.217)T(0.217)VT(0.217)QS(0.173)T(0.173)PVPGPS(0.003)VPPPEELQVSPGPR	4	-0.48896
sp|P51610|HCFC1_HUMAN Host cell factor 1 OS=Homo sapiens OX=9606 GN=HCFC1 PE=1 SV=2	P51610	1488	81.341	AVT(0.107)T(0.095)VT(0.308)QS(0.24)T(0.24)PVPGPS(0.011)VPPPEELQVSPGPR	3	-0.37487
sp|P51610|HCFC1_HUMAN Host cell factor 1 OS=Homo sapiens OX=9606 GN=HCFC1 PE=1 SV=2	P51610	1491	61.429	AVT(0.048)T(0.048)VT(0.157)QS(0.157)T(0.433)PVPGPS(0.157)VPPPEELQVS(0.001)PGPR	4	0.98464
sp|P51610|HCFC1_HUMAN Host cell factor 1 OS=Homo sapiens OX=9606 GN=HCFC1 PE=1 SV=2	P51610	574	53.522	IPPS(0.039)S(0.017)APT(0.004)VLS(0.057)VPAGT(0.456)T(0.174)IVKT(0.214)MAVT(0.034)PGT(0.001)T(0.001)T(0.003)LPATVK	5	-0.72487
sp|P51610|HCFC1_HUMAN Host cell factor 1 OS=Homo sapiens OX=9606 GN=HCFC1 PE=1 SV=2	P51610	575	64.045	IPPS(0.029)S(0.029)APT(0.075)VLS(0.202)VPAGT(0.073)T(0.564)IVKT(0.021)MAVT(0.005)PGT(0.001)TTLPATVK	3	0.69731
sp|P51610|HCFC1_HUMAN Host cell factor 1 OS=Homo sapiens OX=9606 GN=HCFC1 PE=1 SV=2	P51610	579	117.2	T(0.983)MAVT(0.017)PGTTTLPATVK	2	-0.060108
sp|P51610|HCFC1_HUMAN Host cell factor 1 OS=Homo sapiens OX=9606 GN=HCFC1 PE=1 SV=2	P51610	583	98.156	T(0.012)MAVT(0.965)PGT(0.009)T(0.009)T(0.002)LPAT(0.003)VK	2	-0.5886
sp|P51610|HCFC1_HUMAN Host cell factor 1 OS=Homo sapiens OX=9606 GN=HCFC1 PE=1 SV=2	P51610	858	125.23	LVT(0.999)PVTVS(0.001)AVKPAVTTLVVK	3	0.52589
sp|P51610|HCFC1_HUMAN Host cell factor 1 OS=Homo sapiens OX=9606 GN=HCFC1 PE=1 SV=2	P51610	861	105.95	LVT(0.03)PVT(0.963)VS(0.008)AVKPAVTTLVVK	2	0.4181
sp|P51610|HCFC1_HUMAN Host cell factor 1 OS=Homo sapiens OX=9606 GN=HCFC1 PE=1 SV=2	P51610	694	108.72	PVQT(0.473)S(0.37)AVT(0.022)GQAS(0.132)T(0.002)GPVTQIIQTK	3	-0.3901
sp|P51610|HCFC1_HUMAN Host cell factor 1 OS=Homo sapiens OX=9606 GN=HCFC1 PE=1 SV=2	P51610	698	94.606	VMS(0.038)VVQT(0.198)KPVQT(0.005)S(0.005)AVT(0.526)GQAS(0.221)T(0.005)GPVT(0.001)QIIQTK	4	0.33983
sp|P51610|HCFC1_HUMAN Host cell factor 1 OS=Homo sapiens OX=9606 GN=HCFC1 PE=1 SV=2	P51610	651	57.788	S(0.01)GTVTVAQQAQVVT(0.757)T(0.757)VVGGVT(0.476)K	2	0.41806
sp|P51610|HCFC1_HUMAN Host cell factor 1 OS=Homo sapiens OX=9606 GN=HCFC1 PE=1 SV=2	P51610	652	57.788	S(0.01)GTVTVAQQAQVVT(0.757)T(0.757)VVGGVT(0.476)K	2	0.41806
sp|P51610|HCFC1_HUMAN Host cell factor 1 OS=Homo sapiens OX=9606 GN=HCFC1 PE=1 SV=2	P51610	658	52.464	S(0.072)GT(0.001)VT(0.028)VAQQAQVVT(0.002)T(0.236)VVGGVT(0.661)K	3	-0.029101
sp|P51610|HCFC1_HUMAN Host cell factor 1 OS=Homo sapiens OX=9606 GN=HCFC1 PE=1 SV=2	P51610	800	113.69	S(0.006)PITIIT(0.567)T(0.425)KVMT(0.001)S(0.001)GTGAPAK	2	0.084603
sp|P51610|HCFC1_HUMAN Host cell factor 1 OS=Homo sapiens OX=9606 GN=HCFC1 PE=1 SV=2	P51610	801	101.53	S(0.008)PITIIT(0.058)T(0.934)K	1	-0.0618
sp|P51610|HCFC1_HUMAN Host cell factor 1 OS=Homo sapiens OX=9606 GN=HCFC1 PE=1 SV=2	P51610	808	95.401	SPITIIT(0.001)T(0.076)KVMT(0.123)S(0.203)GT(0.596)GAPAK	2	0.91746
sp|P51610|HCFC1_HUMAN Host cell factor 1 OS=Homo sapiens OX=9606 GN=HCFC1 PE=1 SV=2	P51610	612	43.768	T(0.523)AAAQVGT(0.323)S(0.093)VS(0.041)S(0.014)AT(0.001)NT(0.001)S(0.001)T(0.001)RPIIT(0.001)VHK	4	-0.12716
sp|P51610|HCFC1_HUMAN Host cell factor 1 OS=Homo sapiens OX=9606 GN=HCFC1 PE=1 SV=2	P51610	619	111.53	TAAAQVGT(0.878)S(0.097)VS(0.012)S(0.012)ATNTS(0.001)TRPIITVHK	3	-0.24193
sp|P51610|HCFC1_HUMAN Host cell factor 1 OS=Homo sapiens OX=9606 GN=HCFC1 PE=1 SV=2	P51610	625	43.293	T(0.001)AAAQVGT(0.117)S(0.178)VS(0.324)S(0.273)AT(0.303)NT(0.32)S(0.325)T(0.115)RPIIT(0.043)VHK	4	0.41362
sp|P51610|HCFC1_HUMAN Host cell factor 1 OS=Homo sapiens OX=9606 GN=HCFC1 PE=1 SV=2	P51610	627	43.293	TAAAQVGT(0.559)S(0.285)VS(0.171)S(0.171)AT(0.171)NT(0.4)S(0.104)T(0.104)RPIIT(0.033)VHK	4	0.33686
sp|P51610|HCFC1_HUMAN Host cell factor 1 OS=Homo sapiens OX=9606 GN=HCFC1 PE=1 SV=2	P51610	634	49.106	TAAAQVGT(0.01)S(0.169)VS(0.169)S(0.049)AT(0.009)NT(0.011)S(0.07)T(0.005)RPIIT(0.509)VHK	4	0.30355
sp|P51610|HCFC1_HUMAN Host cell factor 1 OS=Homo sapiens OX=9606 GN=HCFC1 PE=1 SV=2	P51610	771	130.95	T(0.952)IPMS(0.024)AIITQAGATGVTS(0.012)S(0.012)PGIK	2	0.018705
sp|P51610|HCFC1_HUMAN Host cell factor 1 OS=Homo sapiens OX=9606 GN=HCFC1 PE=1 SV=2	P51610	779	80.507	T(0.005)IPMS(0.061)AIIT(0.812)QAGATGVTS(0.061)S(0.061)PGIK	2	0.019379
sp|P51610|HCFC1_HUMAN Host cell factor 1 OS=Homo sapiens OX=9606 GN=HCFC1 PE=1 SV=2	P51610	689	116.6	VMS(0.044)VVQT(0.804)KPVQT(0.036)S(0.036)AVT(0.008)GQAS(0.058)T(0.011)GPVT(0.001)QIIQTK	4	0.091288
sp|P51610|HCFC1_HUMAN Host cell factor 1 OS=Homo sapiens OX=9606 GN=HCFC1 PE=1 SV=2	P51610	490	83.823	VT(1)GPQATTGTPLVTMR	3	-1.0806
sp|P51610|HCFC1_HUMAN Host cell factor 1 OS=Homo sapiens OX=9606 GN=HCFC1 PE=1 SV=2	P51610	495	56.527	VT(0.063)GPQAT(0.907)T(0.001)GTPLVT(0.002)MRPAS(0.027)QAGK	2	-0.057033
sp|P51610|HCFC1_HUMAN Host cell factor 1 OS=Homo sapiens OX=9606 GN=HCFC1 PE=1 SV=2	P51610	405	102.38	YDIPAT(0.933)AAT(0.042)AT(0.008)S(0.008)PT(0.008)PNPVPS(0.001)VPANPPK	2	0.60152
sp|P51610|HCFC1_HUMAN Host cell factor 1 OS=Homo sapiens OX=9606 GN=HCFC1 PE=1 SV=2	P51610	413	57.148	YDIPAT(0.092)AAT(0.092)AT(0.108)S(0.032)PT(0.653)PNPVPS(0.024)VPANPPK	2	0.26169
sp|P52948|NUP98_HUMAN Nuclear pore complex protein Nup98-Nup96 OS=Homo sapiens OX=9606 GN=NUP98 PE=1 SV=4	P52948	223	53.104	KGPQNQVGAGT(0.292)T(0.088)T(0.244)GLFGS(0.054)S(0.054)PAT(0.054)S(0.054)S(0.054)AT(0.054)GLFS(0.02)S(0.009)S(0.004)T(0.011)T(0.005)NS(0.003)GFAYGQNK	3	-0.66416
sp|P52948|NUP98_HUMAN Nuclear pore complex protein Nup98-Nup96 OS=Homo sapiens OX=9606 GN=NUP98 PE=1 SV=4	P52948	234	61.759	KGPQNQVGAGT(0.001)T(0.001)T(0.001)GLFGS(0.02)S(0.02)PAT(0.34)S(0.34)S(0.114)AT(0.04)GLFS(0.02)S(0.02)S(0.02)T(0.024)T(0.028)NS(0.011)GFAYGQNK	3	-0.72191
sp|P52948|NUP98_HUMAN Nuclear pore complex protein Nup98-Nup96 OS=Homo sapiens OX=9606 GN=NUP98 PE=1 SV=4	P52948	238	58.325	KGPQNQVGAGT(0.044)T(0.054)T(0.044)GLFGS(0.044)S(0.044)PAT(0.17)S(0.17)S(0.17)AT(0.194)GLFS(0.015)S(0.015)S(0.015)T(0.001)T(0.001)NS(0.015)GFAYGQNK	4	-0.21557
sp|P52948|NUP98_HUMAN Nuclear pore complex protein Nup98-Nup96 OS=Homo sapiens OX=9606 GN=NUP98 PE=1 SV=4	P52948	257	66.083	T(0.159)AFGT(0.145)S(0.145)T(0.145)T(0.145)GFGT(0.145)NPGGLFGQQNQQTTS(0.057)LFS(0.057)K	3	0.31039
sp|P52948|NUP98_HUMAN Nuclear pore complex protein Nup98-Nup96 OS=Homo sapiens OX=9606 GN=NUP98 PE=1 SV=4	P52948	261	42.922	T(0.219)AFGT(0.518)S(0.331)T(0.304)T(0.304)GFGT(0.258)NPGGLFGQQNQQT(0.001)T(0.001)S(0.033)LFS(0.032)K	3	0.5913
sp|P52948|NUP98_HUMAN Nuclear pore complex protein Nup98-Nup96 OS=Homo sapiens OX=9606 GN=NUP98 PE=1 SV=4	P52948	263	48.655	T(0.219)AFGT(0.518)S(0.331)T(0.304)T(0.304)GFGT(0.258)NPGGLFGQQNQQT(0.001)T(0.001)S(0.033)LFS(0.032)K	3	0.5913
sp|P52948|NUP98_HUMAN Nuclear pore complex protein Nup98-Nup96 OS=Homo sapiens OX=9606 GN=NUP98 PE=1 SV=4	P52948	264	48.655	T(0.219)AFGT(0.518)S(0.331)T(0.304)T(0.304)GFGT(0.258)NPGGLFGQQNQQT(0.001)T(0.001)S(0.033)LFS(0.032)K	3	0.5913
sp|P52948|NUP98_HUMAN Nuclear pore complex protein Nup98-Nup96 OS=Homo sapiens OX=9606 GN=NUP98 PE=1 SV=4	P52948	268	42.922	T(0.219)AFGT(0.518)S(0.331)T(0.304)T(0.304)GFGT(0.258)NPGGLFGQQNQQT(0.001)T(0.001)S(0.033)LFS(0.032)K	3	0.5913
sp|P55265|DSRAD_HUMAN Double-stranded RNA-specific adenosine deaminase OS=Homo sapiens OX=9606 GN=ADAR PE=1 SV=4	P55265	391	55.851	NAEFLT(0.638)CNIPT(0.152)S(0.152)NAS(0.05)NNMVT(0.006)T(0.001)EK	2	-0.49025
sp|P55265|DSRAD_HUMAN Double-stranded RNA-specific adenosine deaminase OS=Homo sapiens OX=9606 GN=ADAR PE=1 SV=4	P55265	405	61.097	NAEFLTCNIPT(0.164)S(0.215)NAS(0.048)NNMVT(0.286)T(0.286)EK	2	-0.18868
sp|P55265|DSRAD_HUMAN Double-stranded RNA-specific adenosine deaminase OS=Homo sapiens OX=9606 GN=ADAR PE=1 SV=4	P55265	406	61.097	NAEFLTCNIPT(0.164)S(0.215)NAS(0.048)NNMVT(0.286)T(0.286)EK	2	-0.18868
sp|P85037|FOXK1_HUMAN Forkhead box protein K1 OS=Homo sapiens OX=9606 GN=FOXK1 PE=1 SV=1	P85037	679	100.66	EPAAAVAAT(0.825)AT(0.085)T(0.031)T(0.031)PAT(0.013)AT(0.006)T(0.007)AS(0.001)ASASSTGEPEVK	3	0.20317
sp|P85037|FOXK1_HUMAN Forkhead box protein K1 OS=Homo sapiens OX=9606 GN=FOXK1 PE=1 SV=1	P85037	681	102.6	EPAAAVAAT(0.018)AT(0.401)T(0.401)T(0.105)PAT(0.045)AT(0.01)T(0.01)AS(0.005)AS(0.001)AS(0.001)STGEPEVK	3	0.26295
sp|P85037|FOXK1_HUMAN Forkhead box protein K1 OS=Homo sapiens OX=9606 GN=FOXK1 PE=1 SV=1	P85037	682	126.94	EPAAAVAAT(0.013)AT(0.098)T(0.654)T(0.22)PAT(0.003)ATTAS(0.004)AS(0.003)AS(0.003)S(0.003)TGEPEVK	3	1.0762
sp|P85037|FOXK1_HUMAN Forkhead box protein K1 OS=Homo sapiens OX=9606 GN=FOXK1 PE=1 SV=1	P85037	683	102.6	EPAAAVAAT(0.48)AT(0.48)T(0.491)T(0.491)PAT(0.054)AT(0.002)T(0.001)AS(0.001)ASAS(0.001)S(0.001)TGEPEVK	3	0.53996
sp|P85037|FOXK1_HUMAN Forkhead box protein K1 OS=Homo sapiens OX=9606 GN=FOXK1 PE=1 SV=1	P85037	686	40.328	EPAAAVAAT(0.132)AT(0.138)T(0.138)T(0.138)PAT(0.138)AT(0.138)T(0.125)AS(0.031)AS(0.006)AS(0.006)S(0.006)TGEPEVK	3	0.32199
sp|P85037|FOXK1_HUMAN Forkhead box protein K1 OS=Homo sapiens OX=9606 GN=FOXK1 PE=1 SV=1	P85037	688	40.328	EPAAAVAAT(0.132)AT(0.138)T(0.138)T(0.138)PAT(0.138)AT(0.138)T(0.125)AS(0.031)AS(0.006)AS(0.006)S(0.006)TGEPEVK	3	0.32199
sp|Q01082|SPTB2_HUMAN Spectrin beta chain, non-erythrocytic 1 OS=Homo sapiens OX=9606 GN=SPTBN1 PE=1 SV=2	Q01082	2297	47.59	DDEEMNT(0.81)WIQAIS(0.064)S(0.064)AIS(0.012)S(0.012)DKHEVS(0.003)AS(0.003)T(0.001)QS(0.007)T(0.005)PAS(0.013)S(0.006)R	4	0.30522
sp|Q01167|FOXK2_HUMAN Forkhead box protein K2 OS=Homo sapiens OX=9606 GN=FOXK2 PE=1 SV=3	Q01167	556	55.171	IIQT(0.006)AQT(0.05)T(0.121)PVQT(0.712)VT(0.111)IVQQAPLGQHQLPIK	3	0.26614
sp|Q03164|KMT2A_HUMAN Histone-lysine N-methyltransferase 2A OS=Homo sapiens OX=9606 GN=KMT2A PE=1 SV=5	Q03164	3051	52.721	YVPNS(0.306)T(0.306)DS(0.306)PGPS(0.079)QIS(0.002)NAAVQTTPPHLKPATEK	4	-0.92774
sp|Q07001|ACHD_HUMAN Acetylcholine receptor subunit delta OS=Homo sapiens OX=9606 GN=CHRND PE=1 SV=1	Q07001	302	59.931	LPAT(0.5)S(0.5)MAIPLIGK	2	0.12097
sp|Q08188|TGM3_HUMAN Protein-glutamine gamma-glutamyltransferase E OS=Homo sapiens OX=9606 GN=TGM3 PE=1 SV=4	Q08188	205	48.602	DAAT(1)DVAS(1)R	1	1.8631
sp|Q12830|BPTF_HUMAN Nucleosome-remodeling factor subunit BPTF OS=Homo sapiens OX=9606 GN=BPTF PE=1 SV=3	Q12830	2230	93.494	GQPVS(0.319)T(0.538)AVS(0.13)APNT(0.001)VS(0.006)S(0.006)TPGQK	3	-0.18396
sp|Q12830|BPTF_HUMAN Nucleosome-remodeling factor subunit BPTF OS=Homo sapiens OX=9606 GN=BPTF PE=1 SV=3	Q12830	2237	67.964	GQPVS(0.079)T(0.077)AVS(0.079)APNT(0.497)VS(0.224)S(0.032)T(0.011)PGQK	2	-0.52817
sp|Q12830|BPTF_HUMAN Nucleosome-remodeling factor subunit BPTF OS=Homo sapiens OX=9606 GN=BPTF PE=1 SV=3	Q12830	2052	90.397	LEQQKPT(0.958)VIAT(0.001)S(0.003)T(0.005)T(0.015)S(0.003)PTS(0.002)S(0.005)TTS(0.005)TIS(0.004)PAQK	3	0.34825
sp|Q12830|BPTF_HUMAN Nucleosome-remodeling factor subunit BPTF OS=Homo sapiens OX=9606 GN=BPTF PE=1 SV=3	Q12830	2056	53.622	LEQQKPT(0.192)VIAT(0.422)S(0.377)T(0.37)T(0.37)S(0.129)PT(0.045)S(0.023)S(0.023)T(0.006)T(0.002)S(0.021)T(0.001)IS(0.02)PAQK	3	-0.32311
sp|Q12830|BPTF_HUMAN Nucleosome-remodeling factor subunit BPTF OS=Homo sapiens OX=9606 GN=BPTF PE=1 SV=3	Q12830	2058	57.745	LEQQKPT(0.012)VIAT(0.104)S(0.141)T(0.45)T(0.209)S(0.218)PT(0.274)S(0.164)S(0.161)T(0.089)T(0.046)S(0.073)T(0.004)IS(0.056)PAQK	3	0.36018
sp|Q12830|BPTF_HUMAN Nucleosome-remodeling factor subunit BPTF OS=Homo sapiens OX=9606 GN=BPTF PE=1 SV=3	Q12830	2059	52.721	LEQQKPT(0.192)VIAT(0.422)S(0.377)T(0.37)T(0.37)S(0.129)PT(0.045)S(0.023)S(0.023)T(0.006)T(0.002)S(0.021)T(0.001)IS(0.02)PAQK	3	-0.32311
sp|Q12830|BPTF_HUMAN Nucleosome-remodeling factor subunit BPTF OS=Homo sapiens OX=9606 GN=BPTF PE=1 SV=3	Q12830	2062	57.745	LEQQKPT(0.012)VIAT(0.104)S(0.141)T(0.45)T(0.209)S(0.218)PT(0.274)S(0.164)S(0.161)T(0.089)T(0.046)S(0.073)T(0.004)IS(0.056)PAQK	3	0.36018
sp|Q12830|BPTF_HUMAN Nucleosome-remodeling factor subunit BPTF OS=Homo sapiens OX=9606 GN=BPTF PE=1 SV=3	Q12830	1712	79.875	T(0.012)VIT(0.911)EVT(0.016)T(0.003)MTS(0.035)TVATES(0.022)K	2	0.85045
sp|Q12830|BPTF_HUMAN Nucleosome-remodeling factor subunit BPTF OS=Homo sapiens OX=9606 GN=BPTF PE=1 SV=3	Q12830	1715	55.094	T(0.005)VIT(0.24)EVT(0.413)T(0.271)MT(0.018)S(0.005)TVATES(0.048)K	3	0.30113
sp|Q12830|BPTF_HUMAN Nucleosome-remodeling factor subunit BPTF OS=Homo sapiens OX=9606 GN=BPTF PE=1 SV=3	Q12830	1716	59.227	TVIT(0.002)EVT(0.064)T(0.359)MT(0.078)S(0.286)T(0.005)VATES(0.206)K	2	0.021441
sp|Q13428|TCOF_HUMAN Treacle protein OS=Homo sapiens OX=9606 GN=TCOF1 PE=1 SV=3	Q13428	663	94.163	VGT(1)QAPRK	2	0.73796
sp|Q13492|PICAL_HUMAN Phosphatidylinositol-binding clathrin assembly protein OS=Homo sapiens OX=9606 GN=PICALM PE=1 SV=2	Q13492	370	41.287	KPHT(0.044)S(0.044)LT(0.044)T(0.059)AAS(0.204)PVS(0.243)T(0.048)S(0.053)AGGIMT(0.243)APAIDIFS(0.003)TPS(0.003)S(0.003)S(0.003)NS(0.003)TS(0.003)K	4	-0.35367
sp|Q13790|APOF_HUMAN Apolipoprotein F OS=Homo sapiens OX=9606 GN=APOF PE=1 SV=2	Q13790	2	53.861	T(1)GLCGYS(1)APDMRGLR	3	-1.1221
sp|Q14004|CDK13_HUMAN Cyclin-dependent kinase 13 OS=Homo sapiens OX=9606 GN=CDK13 PE=1 SV=2	Q14004	1286	42.123	T(0.041)ENQHVPT(0.313)T(0.248)S(0.062)S(0.248)S(0.082)LT(0.007)DPHAGVK	4	0.83871
sp|Q14004|CDK13_HUMAN Cyclin-dependent kinase 13 OS=Homo sapiens OX=9606 GN=CDK13 PE=1 SV=2	Q14004	1287	45.707	T(0.14)ENQHVPT(0.096)T(0.479)S(0.132)S(0.075)S(0.075)LT(0.003)DPHAGVK	4	-0.15684
sp|Q14119|VEZF1_HUMAN Vascular endothelial zinc finger 1 OS=Homo sapiens OX=9606 GN=VEZF1 PE=1 SV=2	Q14119	108	57.496	KT(0.853)PT(0.101)T(0.02)VVPLIS(0.019)TIAGDS(0.004)S(0.003)R	3	-0.047659
sp|Q14119|VEZF1_HUMAN Vascular endothelial zinc finger 1 OS=Homo sapiens OX=9606 GN=VEZF1 PE=1 SV=2	Q14119	111	40.88	T(0.08)PT(0.066)T(0.214)VVPLIS(0.175)T(0.056)IAGDS(0.205)S(0.205)R	2	0.59185
sp|Q14119|VEZF1_HUMAN Vascular endothelial zinc finger 1 OS=Homo sapiens OX=9606 GN=VEZF1 PE=1 SV=2	Q14119	118	68.406	KT(0.001)PT(0.001)T(0.001)VVPLIS(0.931)T(0.924)IAGDS(0.046)S(0.097)R	3	-0.60411
sp|Q14119|VEZF1_HUMAN Vascular endothelial zinc finger 1 OS=Homo sapiens OX=9606 GN=VEZF1 PE=1 SV=2	Q14119	138	50.029	T(0.001)S(0.018)LVS(0.018)T(0.017)IAGILS(0.107)T(0.107)VT(0.107)T(0.107)S(0.107)S(0.107)S(0.107)GT(0.107)NPS(0.019)S(0.019)S(0.019)AS(0.019)TTAMPVTQS(0.018)VK	4	0.21738
sp|Q14119|VEZF1_HUMAN Vascular endothelial zinc finger 1 OS=Homo sapiens OX=9606 GN=VEZF1 PE=1 SV=2	Q14119	140	50.029	TS(0.003)LVS(0.003)T(0.004)IAGILS(0.047)T(0.047)VT(0.365)T(0.122)S(0.098)S(0.098)S(0.098)GT(0.098)NPS(0.008)S(0.002)S(0.001)AS(0.001)T(0.001)T(0.001)AMPVTQS(0.002)VK	3	0.35985
sp|Q14119|VEZF1_HUMAN Vascular endothelial zinc finger 1 OS=Homo sapiens OX=9606 GN=VEZF1 PE=1 SV=2	Q14119	141	50.029	T(0.002)S(0.002)LVS(0.002)T(0.002)IAGILS(0.019)T(0.019)VT(0.297)T(0.297)S(0.07)S(0.07)S(0.07)GT(0.066)NPS(0.021)S(0.01)S(0.01)AS(0.009)T(0.002)T(0.002)AMPVTQS(0.032)VK	4	0.15776
sp|Q14119|VEZF1_HUMAN Vascular endothelial zinc finger 1 OS=Homo sapiens OX=9606 GN=VEZF1 PE=1 SV=2	Q14119	146	55.608	TS(0.008)LVS(0.008)T(0.001)IAGILS(0.094)T(0.094)VT(0.1)T(0.1)S(0.1)S(0.1)S(0.1)GT(0.108)NPS(0.036)S(0.036)S(0.036)AS(0.036)T(0.009)T(0.002)AMPVTQS(0.029)VK	3	0.86668
sp|Q14157|UBP2L_HUMAN Ubiquitin-associated protein 2-like OS=Homo sapiens OX=9606 GN=UBAP2L PE=1 SV=2	Q14157	444	114.56	S(0.109)PAVAT(0.761)S(0.109)T(0.02)AAPPPPSSPLPSK	3	-0.70321
sp|Q14157|UBP2L_HUMAN Ubiquitin-associated protein 2-like OS=Homo sapiens OX=9606 GN=UBAP2L PE=1 SV=2	Q14157	446	118.52	S(0.025)PAVAT(0.003)S(0.105)T(0.744)AAPPPPS(0.041)S(0.041)PLPS(0.041)K	2	0.40534
sp|Q14676|MDC1_HUMAN Mediator of DNA damage checkpoint protein 1 OS=Homo sapiens OX=9606 GN=MDC1 PE=1 SV=3	Q14676	1116	42.181	MT(0.683)PFPAT(0.155)S(0.155)AAPEPHPS(0.002)T(0.001)S(0.002)T(0.001)AQPVTPKPTS(0.001)QATR	3	-0.27606
sp|Q14676|MDC1_HUMAN Mediator of DNA damage checkpoint protein 1 OS=Homo sapiens OX=9606 GN=MDC1 PE=1 SV=3	Q14676	1121	57.097	MT(0.043)PFPAT(0.475)S(0.475)AAPEPHPS(0.002)T(0.002)S(0.001)T(0.001)AQPVTPKPTSQATR	4	-0.36
sp|Q14678|KANK1_HUMAN KN motif and ankyrin repeat domain-containing protein 1 OS=Homo sapiens OX=9606 GN=KANK1 PE=1 SV=3	Q14678	740	56.25	S(0.946)IGVGT(0.641)LLS(0.38)GHS(0.022)GFDRPS(0.011)AVK	2	-0.38278
sp|Q14684|RRP1B_HUMAN Ribosomal RNA processing protein 1 homolog B OS=Homo sapiens OX=9606 GN=RRP1B PE=1 SV=3	Q14684	728	108.31	T(0.499)PT(0.089)S(0.103)S(0.103)PAS(0.103)S(0.103)PLVAK	2	0.67804
sp|Q14686|NCOA6_HUMAN Nuclear receptor coactivator 6 OS=Homo sapiens OX=9606 GN=NCOA6 PE=1 SV=3	Q14686	1919	54.103	S(0.099)IVT(0.5)T(0.131)LVPS(0.237)ELIS(0.034)AVPTTK	3	-0.41417
sp|Q14980|NUMA1_HUMAN Nuclear mitotic apparatus protein 1 OS=Homo sapiens OX=9606 GN=NUMA1 PE=1 SV=2	Q14980	2092	98.592	IAT(0.938)T(0.046)T(0.007)AS(0.009)AATAAAIGATPR	2	-0.61917
sp|Q14980|NUMA1_HUMAN Nuclear mitotic apparatus protein 1 OS=Homo sapiens OX=9606 GN=NUMA1 PE=1 SV=2	Q14980	2093	100.45	IAT(0.153)T(0.78)T(0.031)AS(0.035)AATAAAIGATPR	3	-0.25191
sp|Q14980|NUMA1_HUMAN Nuclear mitotic apparatus protein 1 OS=Homo sapiens OX=9606 GN=NUMA1 PE=1 SV=2	Q14980	2094	73.877	IAT(0.078)T(0.078)T(0.816)AS(0.025)AAT(0.004)AAAIGATPR	2	0.10767
sp|Q15020|SART3_HUMAN Squamous cell carcinoma antigen recognized by T-cells 3 OS=Homo sapiens OX=9606 GN=SART3 PE=1 SV=1	Q15020	902	65.842	KAPGGPMLLPQT(1)YGAR	3	-1.7759
sp|Q15723|ELF2_HUMAN ETS-related transcription factor Elf-2 OS=Homo sapiens OX=9606 GN=ELF2 PE=1 SV=2	Q15723	497	71.879	ALT(0.992)PVS(0.008)IAHGTPVMR	3	0.10412
sp|Q15723|ELF2_HUMAN ETS-related transcription factor Elf-2 OS=Homo sapiens OX=9606 GN=ELF2 PE=1 SV=2	Q15723	374	116.84	S(0.004)PT(0.987)T(0.004)TAS(0.005)VS(0.001)ATAAPR	2	0.23158
sp|Q15723|ELF2_HUMAN ETS-related transcription factor Elf-2 OS=Homo sapiens OX=9606 GN=ELF2 PE=1 SV=2	Q15723	375	92.866	S(0.011)PT(0.214)T(0.852)T(0.852)AS(0.051)VS(0.021)ATAAPR	2	0.056764
sp|Q15723|ELF2_HUMAN ETS-related transcription factor Elf-2 OS=Homo sapiens OX=9606 GN=ELF2 PE=1 SV=2	Q15723	376	92.866	S(0.011)PT(0.214)T(0.852)T(0.852)AS(0.051)VS(0.021)ATAAPR	2	0.056764
sp|Q2KHR3|QSER1_HUMAN Glutamine and serine-rich protein 1 OS=Homo sapiens OX=9606 GN=QSER1 PE=1 SV=3	Q2KHR3	1271	85.42	KTEALQVAT(0.026)T(0.453)S(0.453)PT(0.026)ANT(0.002)TGTAT(0.001)TS(0.019)S(0.019)TTVGAVK	3	-0.054179
sp|Q2KHR3|QSER1_HUMAN Glutamine and serine-rich protein 1 OS=Homo sapiens OX=9606 GN=QSER1 PE=1 SV=3	Q2KHR3	1274	63.768	KT(0.001)EALQVAT(0.012)T(0.012)S(0.006)PT(0.827)ANT(0.003)T(0.004)GT(0.058)AT(0.008)T(0.004)S(0.005)S(0.026)T(0.025)T(0.011)VGAVK	3	-0.027383
sp|Q2KHR3|QSER1_HUMAN Glutamine and serine-rich protein 1 OS=Homo sapiens OX=9606 GN=QSER1 PE=1 SV=3	Q2KHR3	104	108.56	T(0.853)S(0.147)QGTVPTALAFER	2	-0.15124
sp|Q2KHR3|QSER1_HUMAN Glutamine and serine-rich protein 1 OS=Homo sapiens OX=9606 GN=QSER1 PE=1 SV=3	Q2KHR3	959	54.658	VT(0.808)S(0.133)AVVGPS(0.052)HEVQEQS(0.004)S(0.004)GPFK	3	-0.45222
sp|Q2M2H8|MGAL_HUMAN Probable maltase-glucoamylase 2 OS=Homo sapiens OX=9606 GN=MGAM2 PE=2 SV=3	Q2M2H8	542	42.226	T(0.995)T(0.991)NLALET(0.004)IFMNNRS(0.007)FILS(0.003)R	3	-0.34982
sp|Q2M2H8|MGAL_HUMAN Probable maltase-glucoamylase 2 OS=Homo sapiens OX=9606 GN=MGAM2 PE=2 SV=3	Q2M2H8	543	42.226	T(0.995)T(0.991)NLALET(0.004)IFMNNRS(0.007)FILS(0.003)R	3	-0.34982
sp|Q4KMP7|TB10B_HUMAN TBC1 domain family member 10B OS=Homo sapiens OX=9606 GN=TBC1D10B PE=1 SV=3	Q4KMP7	43	78.429	AGPVVVVAPGPPVT(0.8)T(0.044)AT(0.012)S(0.144)APVTLVAPGEAR	3	0.08517
sp|Q4KMP7|TB10B_HUMAN TBC1 domain family member 10B OS=Homo sapiens OX=9606 GN=TBC1D10B PE=1 SV=3	Q4KMP7	44	78.429	AGPVVVVAPGPPVT(0.374)T(0.489)AT(0.107)S(0.026)APVT(0.004)LVAPGEAR	3	0.32913
sp|Q4KMP7|TB10B_HUMAN TBC1 domain family member 10B OS=Homo sapiens OX=9606 GN=TBC1D10B PE=1 SV=3	Q4KMP7	46	66.447	AGPVVVVAPGPPVT(0.295)T(0.295)AT(0.344)S(0.066)APVTLVAPGEAR	3	-0.29914
sp|Q4VCS5|AMOT_HUMAN Angiomotin OS=Homo sapiens OX=9606 GN=AMOT PE=1 SV=1	Q4VCS5	195	53.001	AHPPVT(0.703)S(0.134)APLS(0.163)PPQPNDLYK	2	-0.42392
sp|Q5GFL6|VWA2_HUMAN von Willebrand factor A domain-containing protein 2 OS=Homo sapiens OX=9606 GN=VWA2 PE=1 SV=1	Q5GFL6	386	57.102	VGVAT(0.872)YS(0.128)R	1	0.0003323
sp|Q5H9F3|BCORL_HUMAN BCL-6 corepressor-like protein 1 OS=Homo sapiens OX=9606 GN=BCORL1 PE=1 SV=2	Q5H9F3	668	41.475	T(0.246)T(0.069)QAAGGNVT(0.203)S(0.203)CLGS(0.058)T(0.139)S(0.042)S(0.042)PFVIFPEIVR	3	0.1785
sp|Q5SW79|CE170_HUMAN Centrosomal protein of 170 kDa OS=Homo sapiens OX=9606 GN=CEP170 PE=1 SV=1	Q5SW79	1327	41.476	EINDVAGEIDS(0.234)VT(0.265)S(0.063)S(0.063)GT(0.056)APS(0.056)T(0.056)T(0.056)VS(0.063)T(0.063)AAT(0.018)T(0.002)PGS(0.003)AIDTR	3	0.48766
sp|Q5SW79|CE170_HUMAN Centrosomal protein of 170 kDa OS=Homo sapiens OX=9606 GN=CEP170 PE=1 SV=1	Q5SW79	1331	51.242	EINDVAGEIDS(0.033)VT(0.033)S(0.118)S(0.101)GT(0.392)APS(0.101)T(0.101)T(0.033)VS(0.037)T(0.037)AAT(0.001)T(0.001)PGS(0.009)AIDTR	3	-0.25697
sp|Q5T0B9|ZN362_HUMAN Zinc finger protein 362 OS=Homo sapiens OX=9606 GN=ZNF362 PE=1 SV=1	Q5T0B9	112	90.913	PAT(0.653)S(0.124)T(0.002)VTGLGLS(0.221)TR	2	-0.55364
sp|Q5T0B9|ZN362_HUMAN Zinc finger protein 362 OS=Homo sapiens OX=9606 GN=ZNF362 PE=1 SV=1	Q5T0B9	124	57.144	T(0.273)PS(0.032)VS(0.032)T(0.032)S(0.171)ES(0.151)S(0.151)AGAGT(0.068)GT(0.009)GT(0.004)S(0.024)T(0.002)PS(0.024)TPTTTS(0.02)QS(0.007)R	3	-0.48394
sp|Q5T0B9|ZN362_HUMAN Zinc finger protein 362 OS=Homo sapiens OX=9606 GN=ZNF362 PE=1 SV=1	Q5T0B9	129	84.152	T(0.012)PS(0.027)VS(0.476)T(0.479)S(0.476)ES(0.229)S(0.229)AGAGT(0.063)GT(0.002)GTS(0.001)TPS(0.001)TPTTTS(0.002)QS(0.002)R	3	-0.58066
sp|Q5T0B9|ZN362_HUMAN Zinc finger protein 362 OS=Homo sapiens OX=9606 GN=ZNF362 PE=1 SV=1	Q5T0B9	138	48.694	T(0.033)PS(0.03)VS(0.151)T(0.05)S(0.05)ES(0.017)S(0.017)AGAGT(0.265)GT(0.006)GT(0.005)S(0.064)T(0.064)PS(0.082)T(0.082)PT(0.002)T(0.002)T(0.001)S(0.039)QS(0.039)R	3	0.22716
sp|Q5T0B9|ZN362_HUMAN Zinc finger protein 362 OS=Homo sapiens OX=9606 GN=ZNF362 PE=1 SV=1	Q5T0B9	140	41.418	T(0.002)PS(0.016)VS(0.047)T(0.047)S(0.132)ES(0.062)S(0.062)AGAGT(0.181)GT(0.181)GT(0.028)S(0.022)T(0.012)PS(0.035)T(0.035)PT(0.011)T(0.012)T(0.002)S(0.056)QS(0.056)R	3	0.19568
sp|Q5T1H1|EYS_HUMAN Protein eyes shut homolog OS=Homo sapiens OX=9606 GN=EYS PE=1 SV=5	Q5T1H1	1317	58.676	IS(0.247)T(0.804)PLES(0.949)YLLQELIVTR	2	-3.7749
sp|Q5T6F2|UBAP2_HUMAN Ubiquitin-associated protein 2 OS=Homo sapiens OX=9606 GN=UBAP2 PE=1 SV=1	Q5T6F2	1009	80.967	GVS(0.009)VS(0.13)S(0.198)S(0.266)T(0.36)T(0.027)GLPDMTGS(0.008)VYNK	2	-0.63292
sp|Q5T6F2|UBAP2_HUMAN Ubiquitin-associated protein 2 OS=Homo sapiens OX=9606 GN=UBAP2 PE=1 SV=1	Q5T6F2	486	54.225	LLQLPS(0.284)T(0.374)T(0.103)IENIS(0.119)VS(0.119)VHQPQPK	3	-0.54781
sp|Q5T6F2|UBAP2_HUMAN Ubiquitin-associated protein 2 OS=Homo sapiens OX=9606 GN=UBAP2 PE=1 SV=1	Q5T6F2	487	47.808	LLQLPS(0.127)T(0.35)T(0.35)IENIS(0.127)VS(0.046)VHQPQPK	3	-0.4502
sp|Q5T6F2|UBAP2_HUMAN Ubiquitin-associated protein 2 OS=Homo sapiens OX=9606 GN=UBAP2 PE=1 SV=1	Q5T6F2	654	77.192	S(1)QQT(0.935)LDT(0.065)PK	2	2.9305
sp|Q5VT52|RPRD2_HUMAN Regulation of nuclear pre-mRNA domain-containing protein 2 OS=Homo sapiens OX=9606 GN=RPRD2 PE=1 SV=1	Q5VT52	866	69.379	LS(0.009)DT(0.489)T(0.489)EYQPILS(0.004)S(0.004)YS(0.004)HR	3	-0.49944
sp|Q5VT52|RPRD2_HUMAN Regulation of nuclear pre-mRNA domain-containing protein 2 OS=Homo sapiens OX=9606 GN=RPRD2 PE=1 SV=1	Q5VT52	867	69.379	LS(0.009)DT(0.489)T(0.489)EYQPILS(0.004)S(0.004)YS(0.004)HR	3	-0.49944
sp|Q5VT52|RPRD2_HUMAN Regulation of nuclear pre-mRNA domain-containing protein 2 OS=Homo sapiens OX=9606 GN=RPRD2 PE=1 SV=1	Q5VT52	400	120.55	S(0.019)AVS(0.045)T(0.941)S(0.948)VPT(0.001)KPTENIS(0.045)K	2	-0.029414
sp|Q5VT52|RPRD2_HUMAN Regulation of nuclear pre-mRNA domain-containing protein 2 OS=Homo sapiens OX=9606 GN=RPRD2 PE=1 SV=1	Q5VT52	980	48.832	S(0.013)LFS(0.1)PQNT(0.87)LAAPT(0.002)GHPPT(0.001)S(0.013)GVEK	3	0.20662
sp|Q5VT52|RPRD2_HUMAN Regulation of nuclear pre-mRNA domain-containing protein 2 OS=Homo sapiens OX=9606 GN=RPRD2 PE=1 SV=1	Q5VT52	500	67.153	T(0.001)PAPAT(0.388)T(0.388)T(0.03)S(0.169)HNPLANILS(0.023)K	3	-0.22099
sp|Q5VT52|RPRD2_HUMAN Regulation of nuclear pre-mRNA domain-containing protein 2 OS=Homo sapiens OX=9606 GN=RPRD2 PE=1 SV=1	Q5VT52	501	67.153	T(0.001)PAPAT(0.388)T(0.388)T(0.03)S(0.169)HNPLANILS(0.023)K	3	-0.22099
sp|Q5VTR2|BRE1A_HUMAN E3 ubiquitin-protein ligase BRE1A OS=Homo sapiens OX=9606 GN=RNF20 PE=1 SV=2	Q5VTR2	30	45.79	KAAVEDS(0.993)GT(0.998)T(0.009)VET(0.001)IK	3	-0.022931
sp|Q5VUA4|ZN318_HUMAN Zinc finger protein 318 OS=Homo sapiens OX=9606 GN=ZNF318 PE=1 SV=2	Q5VUA4	1344	71.607	TVVAHTS(0.33)PWMPVVT(0.022)T(0.022)S(0.261)T(0.331)QT(0.033)K	2	-1.4698
sp|Q6MZP7|LIN54_HUMAN Protein lin-54 homolog OS=Homo sapiens OX=9606 GN=LIN54 PE=1 SV=3	Q6MZP7	106	65.495	LGAQT(0.514)PVT(0.094)IS(0.392)ANQIILNK	2	-0.58228
sp|Q6MZP7|LIN54_HUMAN Protein lin-54 homolog OS=Homo sapiens OX=9606 GN=LIN54 PE=1 SV=3	Q6MZP7	109	73.833	LGAQT(0.02)PVT(0.619)IS(0.361)ANQIILNK	3	-0.023307
sp|Q6MZP7|LIN54_HUMAN Protein lin-54 homolog OS=Homo sapiens OX=9606 GN=LIN54 PE=1 SV=3	Q6MZP7	365	71.503	LVT(0.295)AT(0.031)S(0.034)AS(0.272)S(0.272)S(0.029)T(0.029)QPVS(0.033)QNPS(0.005)TNTQPLQQAK	3	0.12134
sp|Q6MZP7|LIN54_HUMAN Protein lin-54 homolog OS=Homo sapiens OX=9606 GN=LIN54 PE=1 SV=3	Q6MZP7	367	41.784	LVT(0.206)AT(0.206)S(0.206)AS(0.206)S(0.086)S(0.037)T(0.037)QPVS(0.015)QNPS(0.001)TNTQPLQQAK	3	-0.0733
sp|Q6MZP7|LIN54_HUMAN Protein lin-54 homolog OS=Homo sapiens OX=9606 GN=LIN54 PE=1 SV=3	Q6MZP7	373	54.3	LVT(0.117)AT(0.141)S(0.141)AS(0.141)S(0.141)S(0.159)T(0.159)QPVS(0.001)QNPS(0.001)TNTQPLQQAK	3	-0.25746
sp|Q6P4R8|NFRKB_HUMAN Nuclear factor related to kappa-B-binding protein OS=Homo sapiens OX=9606 GN=NFRKB PE=1 SV=2	Q6P4R8	481	40.645	LLGQS(0.002)QDNEKELAALFQLWLET(0.998)K	3	-0.5719
sp|Q6P4R8|NFRKB_HUMAN Nuclear factor related to kappa-B-binding protein OS=Homo sapiens OX=9606 GN=NFRKB PE=1 SV=2	Q6P4R8	906	49.141	PAT(0.023)S(0.023)S(0.077)PGT(0.241)S(0.241)APS(0.023)AS(0.096)T(0.271)AAVIQNVT(0.005)GQNIIK	3	0.081762
sp|Q6UN15|FIP1_HUMAN Pre-mRNA 3'-end-processing factor FIP1 OS=Homo sapiens OX=9606 GN=FIP1L1 PE=1 SV=1	Q6UN15	248	85.937	ET(0.565)ALPS(0.174)T(0.106)KAEFTS(0.136)PPS(0.018)LFK	3	0.062368
sp|Q6UN15|FIP1_HUMAN Pre-mRNA 3'-end-processing factor FIP1 OS=Homo sapiens OX=9606 GN=FIP1L1 PE=1 SV=1	Q6UN15	253	80.238	ET(0.076)ALPS(0.379)T(0.379)KAEFTS(0.034)PPS(0.132)LFK	3	0.13458
sp|Q6UVJ0|SAS6_HUMAN Spindle assembly abnormal protein 6 homolog OS=Homo sapiens OX=9606 GN=SASS6 PE=1 SV=1	Q6UVJ0	181	86.866	QLDFT(1)RK	2	-0.096108
sp|Q6UWF3|SCIMP_HUMAN SLP adapter and CSK-interacting membrane protein OS=Homo sapiens OX=9606 GN=SCIMP PE=1 SV=1	Q6UWF3	10	50.284	DTFT(0.002)VQDS(0.985)T(0.506)AMS(0.506)WWR	2	0.99875
sp|Q6UXX5|ITIH6_HUMAN Inter-alpha-trypsin inhibitor heavy chain H6 OS=Homo sapiens OX=9606 GN=ITIH6 PE=1 SV=1	Q6UXX5	876	56.087	PET(1)PNPHMPQT(1)PLPPR	2	-0.43392
sp|Q6UXX5|ITIH6_HUMAN Inter-alpha-trypsin inhibitor heavy chain H6 OS=Homo sapiens OX=9606 GN=ITIH6 PE=1 SV=1	Q6UXX5	884	56.087	PET(1)PNPHMPQT(1)PLPPR	2	-0.43392
sp|Q6VMQ6|MCAF1_HUMAN Activating transcription factor 7-interacting protein 1 OS=Homo sapiens OX=9606 GN=ATF7IP PE=1 SV=3	Q6VMQ6	869	43.554	NPT(0.017)AS(0.108)AAPLGT(0.119)T(0.73)LAVQAVPTAHS(0.026)IVQATR	3	0.23346
sp|Q6VMQ6|MCAF1_HUMAN Activating transcription factor 7-interacting protein 1 OS=Homo sapiens OX=9606 GN=ATF7IP PE=1 SV=3	Q6VMQ6	715	43.416	NVS(0.02)ES(0.061)APPS(0.168)FQT(0.199)PVNT(0.045)VS(0.164)S(0.164)T(0.164)NLVT(0.002)PPAVVS(0.006)S(0.006)QPK	3	0.52617
sp|Q6W2J9|BCOR_HUMAN BCL-6 corepressor OS=Homo sapiens OX=9606 GN=BCOR PE=1 SV=1	Q6W2J9	366	41.597	IS(0.078)T(0.64)S(0.233)PS(0.031)VALS(0.015)KPYMT(0.001)VS(0.001)S(0.001)EFPAAR	3	0.30098
sp|Q6ZNM6|SMI10_HUMAN Sperm-associated microtubule inner protein 10 OS=Homo sapiens OX=9606 GN=SPMIP10 PE=1 SV=1	Q6ZNM6	7	49.466	AS(1)GKDT(0.959)CPT(0.041)LPK	3	-2.2374
sp|Q6ZP01|RBM44_HUMAN RNA-binding protein 44 OS=Homo sapiens OX=9606 GN=RBM44 PE=2 SV=4	Q6ZP01	9	50.034	QAT(0.002)AVVET(0.951)AS(0.047)GK	2	-1.6205
sp|Q6ZRS2|SRCAP_HUMAN Helicase SRCAP OS=Homo sapiens OX=9606 GN=SRCAP PE=1 SV=3	Q6ZRS2	2406	100.77	AET(0.997)QGANHTPVIS(0.003)AHQTR	4	-0.55215
sp|Q6ZTY9|CG065_HUMAN Putative uncharacterized protein LINC02902 OS=Homo sapiens OX=9606 GN=LINC02902 PE=5 SV=1	Q6ZTY9	9	42.001	RMAPT(0.024)ES(0.988)T(0.988)EGR	3	2.3198
sp|Q6ZU80|CE128_HUMAN Centrosomal protein of 128 kDa OS=Homo sapiens OX=9606 GN=CEP128 PE=1 SV=2	Q6ZU80	196	96.668	SRS(1)DAET(1)K	2	2.2515
sp|Q7Z3K3|POGZ_HUMAN Pogo transposable element with ZNF domain OS=Homo sapiens OX=9606 GN=POGZ PE=1 SV=2	Q7Z3K3	252	46.872	S(0.278)T(0.278)PS(0.088)T(0.088)S(0.088)T(0.032)T(0.032)PT(0.011)AT(0.032)QPT(0.032)S(0.032)LGQLAVQS(0.003)PGQS(0.003)NQTTNPK	3	0.11401
sp|Q7Z3K3|POGZ_HUMAN Pogo transposable element with ZNF domain OS=Homo sapiens OX=9606 GN=POGZ PE=1 SV=2	Q7Z3K3	255	62.958	S(0.011)T(0.011)PS(0.139)T(0.139)S(0.139)T(0.044)T(0.044)PT(0.044)AT(0.139)QPT(0.139)S(0.139)LGQLAVQS(0.004)PGQS(0.011)NQTTNPK	4	0.49617
sp|Q7Z3K3|POGZ_HUMAN Pogo transposable element with ZNF domain OS=Homo sapiens OX=9606 GN=POGZ PE=1 SV=2	Q7Z3K3	257	62.958	S(0.069)T(0.069)PS(0.101)T(0.101)S(0.101)T(0.101)T(0.101)PT(0.101)AT(0.101)QPT(0.073)S(0.073)LGQLAVQS(0.009)PGQS(0.002)NQTTNPK	3	0.87545
sp|Q7Z3K3|POGZ_HUMAN Pogo transposable element with ZNF domain OS=Homo sapiens OX=9606 GN=POGZ PE=1 SV=2	Q7Z3K3	258	62.958	S(0.069)T(0.069)PS(0.101)T(0.101)S(0.101)T(0.101)T(0.101)PT(0.101)AT(0.101)QPT(0.073)S(0.073)LGQLAVQS(0.009)PGQS(0.002)NQTTNPK	3	0.87545
sp|Q7Z3K3|POGZ_HUMAN Pogo transposable element with ZNF domain OS=Homo sapiens OX=9606 GN=POGZ PE=1 SV=2	Q7Z3K3	260	62.958	S(0.069)T(0.069)PS(0.101)T(0.101)S(0.101)T(0.101)T(0.101)PT(0.101)AT(0.101)QPT(0.073)S(0.073)LGQLAVQS(0.009)PGQS(0.002)NQTTNPK	3	0.87545
sp|Q7Z3K3|POGZ_HUMAN Pogo transposable element with ZNF domain OS=Homo sapiens OX=9606 GN=POGZ PE=1 SV=2	Q7Z3K3	262	100.55	S(0.002)TPS(0.002)T(0.003)S(0.01)T(0.039)T(0.039)PT(0.139)AT(0.512)QPT(0.124)S(0.124)LGQLAVQS(0.002)PGQS(0.005)NQTTNPK	3	0.054751
sp|Q7Z3K3|POGZ_HUMAN Pogo transposable element with ZNF domain OS=Homo sapiens OX=9606 GN=POGZ PE=1 SV=2	Q7Z3K3	265	58.111	S(0.004)T(0.004)PS(0.034)T(0.034)S(0.034)T(0.034)T(0.034)PT(0.034)AT(0.104)QPT(0.369)S(0.304)LGQLAVQS(0.007)PGQS(0.003)NQTTNPK	3	0.28792
sp|Q7Z3K3|POGZ_HUMAN Pogo transposable element with ZNF domain OS=Homo sapiens OX=9606 GN=POGZ PE=1 SV=2	Q7Z3K3	240	162.64	S(0.171)T(0.486)VPQS(0.171)QS(0.171)QQTK	2	0.13226
sp|Q7Z3K3|POGZ_HUMAN Pogo transposable element with ZNF domain OS=Homo sapiens OX=9606 GN=POGZ PE=1 SV=2	Q7Z3K3	429	55.173	T(0.385)APVAS(0.241)T(0.054)PS(0.062)S(0.062)T(0.024)PIPALS(0.172)PPTK	3	-0.028634
sp|Q7Z3K3|POGZ_HUMAN Pogo transposable element with ZNF domain OS=Homo sapiens OX=9606 GN=POGZ PE=1 SV=2	Q7Z3K3	435	69.92	TAPVAS(0.471)T(0.471)PS(0.022)S(0.022)T(0.005)PIPALS(0.009)PPTK	2	-0.3026
sp|Q7Z3K3|POGZ_HUMAN Pogo transposable element with ZNF domain OS=Homo sapiens OX=9606 GN=POGZ PE=1 SV=2	Q7Z3K3	719	57.427	T(0.007)VPVS(0.015)S(0.015)NDT(0.04)PPS(0.006)ALQEAAPLT(0.469)S(0.224)S(0.224)MDPLPVFLYPPVQR	3	0.90204
sp|Q7Z417|NUFP2_HUMAN FMR1-interacting protein NUFIP2 OS=Homo sapiens OX=9606 GN=NUFIP2 PE=1 SV=1	Q7Z417	369	76.859	T(0.244)IQNS(0.192)S(0.164)VS(0.164)PT(0.018)S(0.021)S(0.021)S(0.021)S(0.021)S(0.021)S(0.021)S(0.021)S(0.021)TGETQTQS(0.018)S(0.018)S(0.018)R	3	-0.91795
sp|Q7Z417|NUFP2_HUMAN FMR1-interacting protein NUFIP2 OS=Homo sapiens OX=9606 GN=NUFIP2 PE=1 SV=1	Q7Z417	378	128.32	T(0.001)IQNS(0.061)S(0.061)VS(0.061)PT(0.482)S(0.061)S(0.088)S(0.061)S(0.025)S(0.025)S(0.019)S(0.019)S(0.014)TGETQTQS(0.008)S(0.008)S(0.008)R	2	-0.2114
sp|Q7Z589|EMSY_HUMAN BRCA2-interacting transcriptional repressor EMSY OS=Homo sapiens OX=9606 GN=EMSY PE=1 SV=2	Q7Z589	262	56.817	IT(0.949)FT(0.036)KPS(0.015)TQTTNTTTQK	3	0.13676
sp|Q7Z589|EMSY_HUMAN BRCA2-interacting transcriptional repressor EMSY OS=Homo sapiens OX=9606 GN=EMSY PE=1 SV=2	Q7Z589	264	74.726	IT(0.016)FT(0.949)KPS(0.035)TQTTNTTTQK	3	-0.14315
sp|Q7Z589|EMSY_HUMAN BRCA2-interacting transcriptional repressor EMSY OS=Homo sapiens OX=9606 GN=EMSY PE=1 SV=2	Q7Z589	501	58.024	LVT(0.827)T(0.162)PT(0.008)GT(0.002)QATYTRPTVSPSIGR	3	0.39786
sp|Q7Z589|EMSY_HUMAN BRCA2-interacting transcriptional repressor EMSY OS=Homo sapiens OX=9606 GN=EMSY PE=1 SV=2	Q7Z589	534	83.883	T(0.779)T(0.205)S(0.008)GS(0.008)IITVVPK	2	0.3882
sp|Q7Z589|EMSY_HUMAN BRCA2-interacting transcriptional repressor EMSY OS=Homo sapiens OX=9606 GN=EMSY PE=1 SV=2	Q7Z589	282	61.038	VIIVT(0.923)T(0.923)S(0.065)PS(0.026)S(0.022)T(0.005)FVPNILS(0.036)K	2	0.34872
sp|Q7Z589|EMSY_HUMAN BRCA2-interacting transcriptional repressor EMSY OS=Homo sapiens OX=9606 GN=EMSY PE=1 SV=2	Q7Z589	283	64.199	VIIVT(0.923)T(0.923)S(0.065)PS(0.026)S(0.022)T(0.005)FVPNILS(0.036)K	2	0.34872
sp|Q7Z739|YTHD3_HUMAN YTH domain-containing family protein 3 OS=Homo sapiens OX=9606 GN=YTHDF3 PE=1 SV=1	Q7Z739	205	63.565	IGGDLT(0.001)AAVT(0.999)K	1	0.18415
sp|Q86T24|KAISO_HUMAN Transcriptional regulator Kaiso OS=Homo sapiens OX=9606 GN=ZBTB33 PE=1 SV=2	Q86T24	251	73.36	LPT(0.968)PVNQATLS(0.015)QTQGS(0.018)EK	2	-0.018143
sp|Q86X24|HORM1_HUMAN HORMA domain-containing protein 1 OS=Homo sapiens OX=9606 GN=HORMAD1 PE=1 SV=1	Q86X24	3	68.485	AT(1)AQLQR	2	-1.886
sp|Q86Y38|XYLT1_HUMAN Xylosyltransferase 1 OS=Homo sapiens OX=9606 GN=XYLT1 PE=1 SV=1	Q86Y38	515	51.013	RFVEYVTFS(0.001)TDDLVT(0.999)K	2	-0.86909
sp|Q86YP4|P66A_HUMAN Transcriptional repressor p66-alpha OS=Homo sapiens OX=9606 GN=GATAD2A PE=1 SV=1	Q86YP4	317	98.759	GT(0.252)T(0.223)AT(0.198)S(0.198)AQANS(0.018)T(0.018)PT(0.003)S(0.014)VAS(0.014)VVTS(0.024)AES(0.019)PAS(0.019)R	2	1.8136
sp|Q86YP4|P66A_HUMAN Transcriptional repressor p66-alpha OS=Homo sapiens OX=9606 GN=GATAD2A PE=1 SV=1	Q86YP4	318	115.91	GT(0.1)T(0.41)AT(0.049)S(0.049)AQANS(0.185)T(0.185)PT(0.004)S(0.004)VAS(0.004)VVTS(0.004)AES(0.003)PAS(0.003)R	2	1.1222
sp|Q86YP4|P66A_HUMAN Transcriptional repressor p66-alpha OS=Homo sapiens OX=9606 GN=GATAD2A PE=1 SV=1	Q86YP4	320	104.61	GT(0.048)T(0.041)AT(0.367)S(0.367)AQANS(0.057)T(0.03)PT(0.004)S(0.019)VAS(0.019)VVTS(0.019)AES(0.015)PAS(0.015)R	2	-0.46706
sp|Q86YP4|P66A_HUMAN Transcriptional repressor p66-alpha OS=Homo sapiens OX=9606 GN=GATAD2A PE=1 SV=1	Q86YP4	327	132.87	GTTATS(0.001)AQANS(0.241)T(0.756)PT(0.001)SVASVVTSAESPASR	2	-0.033262
sp|Q86YP4|P66A_HUMAN Transcriptional repressor p66-alpha OS=Homo sapiens OX=9606 GN=GATAD2A PE=1 SV=1	Q86YP4	586	50.397	T(0.831)PLS(0.127)T(0.009)GGT(0.009)LAFVS(0.012)PS(0.012)LAVHK	3	-0.189
sp|Q86YQ8|CPNE8_HUMAN Copine-8 OS=Homo sapiens OX=9606 GN=CPNE8 PE=1 SV=2	Q86YQ8	557	40.475	PS(0.007)PAPPPYT(0.068)PPT(0.939)HVLQT(0.986)QI	2	-0.36648
sp|Q86YQ8|CPNE8_HUMAN Copine-8 OS=Homo sapiens OX=9606 GN=CPNE8 PE=1 SV=2	Q86YQ8	562	40.475	PS(0.007)PAPPPYT(0.068)PPT(0.939)HVLQT(0.986)QI	2	-0.36648
sp|Q8IVV2|LOXH1_HUMAN Lipoxygenase homology domain-containing protein 1 OS=Homo sapiens OX=9606 GN=LOXHD1 PE=2 SV=4	Q8IVV2	1177	43.794	IGHNNT(1)GMNPGWHCS(1)HVDIRR	2	-1.3394
sp|Q8IWE2|NXP20_HUMAN Protein NOXP20 OS=Homo sapiens OX=9606 GN=FAM114A1 PE=1 SV=2	Q8IWE2	505	58.274	FT(0.998)NS(0.084)LT(0.352)T(0.352)VGS(0.213)NKK	3	-1.0704
sp|Q8IWE2|NXP20_HUMAN Protein NOXP20 OS=Homo sapiens OX=9606 GN=FAM114A1 PE=1 SV=2	Q8IWE2	509	58.274	FT(0.998)NS(0.084)LT(0.352)T(0.352)VGS(0.213)NKK	3	-1.0704
sp|Q8IWE2|NXP20_HUMAN Protein NOXP20 OS=Homo sapiens OX=9606 GN=FAM114A1 PE=1 SV=2	Q8IWE2	510	58.274	FT(0.998)NS(0.084)LT(0.352)T(0.352)VGS(0.213)NKK	3	-1.0704
sp|Q8IWI9|MGAP_HUMAN MAX gene-associated protein OS=Homo sapiens OX=9606 GN=MGA PE=1 SV=4	Q8IWI9	1667	69.672	T(0.005)T(0.005)GIT(0.867)T(0.025)PVAS(0.098)VAFPK	2	-0.32819
sp|Q8IWK6|AGRA3_HUMAN Adhesion G protein-coupled receptor A3 OS=Homo sapiens OX=9606 GN=ADGRA3 PE=1 SV=2	Q8IWK6	892	51.834	FYLIGGGIPIIVCGIT(0.92)AAANIKNYGS(0.08)R	3	1.9599
sp|Q8IWZ3|ANKH1_HUMAN Ankyrin repeat and KH domain-containing protein 1 OS=Homo sapiens OX=9606 GN=ANKHD1 PE=1 SV=1	Q8IWZ3	1813	42.44	NAFPLGAPT(0.918)LVT(0.028)S(0.021)QAT(0.006)T(0.003)LS(0.021)T(0.003)FQPANK	3	0.27636
sp|Q8IWZ3|ANKH1_HUMAN Ankyrin repeat and KH domain-containing protein 1 OS=Homo sapiens OX=9606 GN=ANKHD1 PE=1 SV=1	Q8IWZ3	1816	43.696	NAFPLGAPT(0.068)LVT(0.308)S(0.246)QAT(0.033)T(0.04)LS(0.246)T(0.059)FQPANK	3	-0.5407
sp|Q8IWZ8|SUGP1_HUMAN SURP and G-patch domain-containing protein 1 OS=Homo sapiens OX=9606 GN=SUGP1 PE=1 SV=2	Q8IWZ8	101	121.82	AQT(0.427)S(0.427)T(0.135)DAPT(0.002)S(0.002)APS(0.002)APPS(0.002)TPTPS(0.002)AGK	2	0.96711
sp|Q8IWZ8|SUGP1_HUMAN SURP and G-patch domain-containing protein 1 OS=Homo sapiens OX=9606 GN=SUGP1 PE=1 SV=2	Q8IWZ8	103	137.17	AQT(0.12)S(0.431)T(0.431)DAPT(0.002)S(0.008)APS(0.005)APPS(0.001)TPTPS(0.001)AGK	2	1.2506
sp|Q8IWZ8|SUGP1_HUMAN SURP and G-patch domain-containing protein 1 OS=Homo sapiens OX=9606 GN=SUGP1 PE=1 SV=2	Q8IWZ8	107	122.96	AQT(0.038)S(0.132)T(0.132)DAPT(0.465)S(0.064)APS(0.041)APPS(0.064)TPTPS(0.064)AGK	2	-0.16124
sp|Q8IZ21|PHAR4_HUMAN Phosphatase and actin regulator 4 OS=Homo sapiens OX=9606 GN=PHACTR4 PE=1 SV=1	Q8IZ21	211	44.31	FIIS(0.011)T(0.03)S(0.028)IT(0.088)T(0.088)APAAT(0.32)T(0.32)AAT(0.095)S(0.015)LAKT(0.009)VNLS(0.07)VT(0.213)PS(0.713)PAPR	3	-0.26485
sp|Q8IZ21|PHAR4_HUMAN Phosphatase and actin regulator 4 OS=Homo sapiens OX=9606 GN=PHACTR4 PE=1 SV=1	Q8IZ21	212	44.31	FIIS(0.011)T(0.03)S(0.028)IT(0.088)T(0.088)APAAT(0.32)T(0.32)AAT(0.095)S(0.015)LAKT(0.009)VNLS(0.07)VT(0.213)PS(0.713)PAPR	3	-0.26485
sp|Q8IZL8|PELP1_HUMAN Proline-, glutamic acid- and leucine-rich protein 1 OS=Homo sapiens OX=9606 GN=PELP1 PE=1 SV=2	Q8IZL8	704	65.438	PGPPT(0.794)T(0.18)ANHLGLS(0.016)VPGLVS(0.01)VPPR	3	-0.19161
sp|Q8IZL8|PELP1_HUMAN Proline-, glutamic acid- and leucine-rich protein 1 OS=Homo sapiens OX=9606 GN=PELP1 PE=1 SV=2	Q8IZL8	705	43.841	PGPPT(0.463)T(0.463)ANHLGLS(0.059)VPGLVS(0.014)VPPR	3	-0.13991
sp|Q8N309|LRC43_HUMAN Leucine-rich repeat-containing protein 43 OS=Homo sapiens OX=9606 GN=LRRC43 PE=2 SV=2	Q8N309	24	40.819	EASYESESESESEAGPGT(0.008)QRPGT(0.33)GT(0.33)VS(0.33)AAVR	3	3.8989
sp|Q8N309|LRC43_HUMAN Leucine-rich repeat-containing protein 43 OS=Homo sapiens OX=9606 GN=LRRC43 PE=2 SV=2	Q8N309	26	40.819	EASYESESESESEAGPGT(0.008)QRPGT(0.33)GT(0.33)VS(0.33)AAVR	3	3.8989
sp|Q8N3U4|STAG2_HUMAN Cohesin subunit SA-2 OS=Homo sapiens OX=9606 GN=STAG2 PE=1 SV=3	Q8N3U4	228	62.042	LMT(1)ALVNVALNLSINMDNTQR	2	3.3652
sp|Q8N8G6|CO054_HUMAN Putative uncharacterized protein encoded by LINC02915 OS=Homo sapiens OX=9606 GN=LINC02915 PE=2 SV=1	Q8N8G6	7	51.949	MEVKFIT(1)GK	2	-0.10721
sp|Q8N8W4|PLPL1_HUMAN Omega-hydroxyceramide transacylase OS=Homo sapiens OX=9606 GN=PNPLA1 PE=1 SV=3	Q8N8W4	431	67.08	PSLGPS(0.025)T(0.745)VGAPQT(0.229)LPR	2	0.59556
sp|Q8NBS9|TXND5_HUMAN Thioredoxin domain-containing protein 5 OS=Homo sapiens OX=9606 GN=TXNDC5 PE=1 SV=2	Q8NBS9	167	81.489	DFQTLENWMLQT(0.958)LNEEPVT(0.04)PEPEVEPPS(0.001)APELK	4	0.0058986
sp|Q8NBS9|TXND5_HUMAN Thioredoxin domain-containing protein 5 OS=Homo sapiens OX=9606 GN=TXNDC5 PE=1 SV=2	Q8NBS9	174	55.119	DFQT(0.02)LENWMLQT(0.06)LNEEPVT(0.89)PEPEVEPPS(0.029)APELK	3	0.63481
sp|Q8NBS9|TXND5_HUMAN Thioredoxin domain-containing protein 5 OS=Homo sapiens OX=9606 GN=TXNDC5 PE=1 SV=2	Q8NBS9	297	42.322	T(0.258)ET(0.234)GAT(0.234)ET(0.25)VT(0.016)PS(0.008)EAPVLAAEPEADK	3	0.79678
sp|Q8NBS9|TXND5_HUMAN Thioredoxin domain-containing protein 5 OS=Homo sapiens OX=9606 GN=TXNDC5 PE=1 SV=2	Q8NBS9	299	41.423	T(0.069)ET(0.323)GAT(0.323)ET(0.201)VT(0.032)PS(0.053)EAPVLAAEPEADK	3	1.3326
sp|Q8NBS9|TXND5_HUMAN Thioredoxin domain-containing protein 5 OS=Homo sapiens OX=9606 GN=TXNDC5 PE=1 SV=2	Q8NBS9	302	82.59	T(0.02)ET(0.017)GAT(0.731)ET(0.167)VT(0.047)PS(0.018)EAPVLAAEPEADK	2	0.21306
sp|Q8NBS9|TXND5_HUMAN Thioredoxin domain-containing protein 5 OS=Homo sapiens OX=9606 GN=TXNDC5 PE=1 SV=2	Q8NBS9	304	110.22	TET(0.001)GAT(0.034)ET(0.963)VT(0.001)PSEAPVLAAEPEADK	2	0.61922
sp|Q8ND83|SLAI1_HUMAN SLAIN motif-containing protein 1 OS=Homo sapiens OX=9606 GN=SLAIN1 PE=1 SV=3	Q8ND83	413	100.22	MPS(0.069)T(0.652)T(0.098)AIS(0.057)S(0.057)NIS(0.057)S(0.01)PVTVR	2	0.21834
sp|Q8ND83|SLAI1_HUMAN SLAIN motif-containing protein 1 OS=Homo sapiens OX=9606 GN=SLAIN1 PE=1 SV=3	Q8ND83	414	81.565	MPS(0.316)T(0.316)T(0.316)AIS(0.013)S(0.013)NIS(0.013)S(0.013)PVTVR	2	0.68281
sp|Q8NDV7|TNR6A_HUMAN Trinucleotide repeat-containing gene 6A protein OS=Homo sapiens OX=9606 GN=TNRC6A PE=1 SV=2	Q8NDV7	584	46.66	GGGVWES(0.008)GAANS(0.392)QS(0.399)T(0.465)S(0.407)WGS(0.052)GNGANS(0.146)GGS(0.131)RR	3	2.6984
sp|Q8NFD5|ARI1B_HUMAN AT-rich interactive domain-containing protein 1B OS=Homo sapiens OX=9606 GN=ARID1B PE=1 SV=3	Q8NFD5	1656	63.488	VMPT(0.787)VPT(0.106)S(0.106)QVT(0.002)GPPPQPPPIR	3	0.37902
sp|Q8NFU5|IPMK_HUMAN Inositol polyphosphate multikinase OS=Homo sapiens OX=9606 GN=IPMK PE=1 SV=1	Q8NFU5	3	48.561	AT(1)EPPSPLR	2	-0.45898
sp|Q8TCU4|ALMS1_HUMAN Centrosome-associated protein ALMS1 OS=Homo sapiens OX=9606 GN=ALMS1 PE=1 SV=4	Q8TCU4	1513	44.74	VS(0.183)VAPGPVGQT(0.149)T(0.489)GAPT(0.009)IT(0.004)S(0.059)PS(0.059)YS(0.049)QHR	3	0.53359
sp|Q8TD08|MK15_HUMAN Mitogen-activated protein kinase 15 OS=Homo sapiens OX=9606 GN=MAPK15 PE=1 SV=1	Q8TD08	97	40.066	DIYLVFEFMDT(1)DLNAVIRK	2	0.062039
sp|Q8WWH4|ASZ1_HUMAN Ankyrin repeat, SAM and basic leucine zipper domain-containing protein 1 OS=Homo sapiens OX=9606 GN=ASZ1 PE=1 SV=1	Q8WWH4	274	40.104	DHIFS(0.335)S(0.335)YT(0.335)AFGDLEVFLHGLGLEHMT(0.996)DLLK	4	0.92034
sp|Q8WWH4|ASZ1_HUMAN Ankyrin repeat, SAM and basic leucine zipper domain-containing protein 1 OS=Homo sapiens OX=9606 GN=ASZ1 PE=1 SV=1	Q8WWH4	292	40.104	DHIFS(0.335)S(0.335)YT(0.335)AFGDLEVFLHGLGLEHMT(0.996)DLLK	4	0.92034
sp|Q8WXI7|MUC16_HUMAN Mucin-16 OS=Homo sapiens OX=9606 GN=MUC16 PE=1 SV=3	Q8WXI7	2843	62.287	LT(0.07)AT(0.192)QS(0.976)T(0.762)APKGIPVK	2	0.51095
sp|Q8WXI7|MUC16_HUMAN Mucin-16 OS=Homo sapiens OX=9606 GN=MUC16 PE=1 SV=3	Q8WXI7	7830	72.096	RIQTELAS(0.511)S(0.978)LT(0.511)PGLR	2	2.1831
sp|Q8WXI9|P66B_HUMAN Transcriptional repressor p66-beta OS=Homo sapiens OX=9606 GN=GATAD2B PE=1 SV=1	Q8WXI9	311	73.294	T(0.274)T(0.274)S(0.222)S(0.222)AIYMNLAS(0.007)HIQPGTVNR	2	-0.28013
sp|Q8WXI9|P66B_HUMAN Transcriptional repressor p66-beta OS=Homo sapiens OX=9606 GN=GATAD2B PE=1 SV=1	Q8WXI9	312	73.294	T(0.064)T(0.317)S(0.309)S(0.309)AIYMNLAS(0.001)HIQPGTVNR	3	-0.47363
sp|Q8WXI9|P66B_HUMAN Transcriptional repressor p66-beta OS=Homo sapiens OX=9606 GN=GATAD2B PE=1 SV=1	Q8WXI9	287	101.53	T(0.36)T(0.36)T(0.279)PNMNPAINYQPQSSSSVPCQR	2	-0.28314
sp|Q8WXI9|P66B_HUMAN Transcriptional repressor p66-beta OS=Homo sapiens OX=9606 GN=GATAD2B PE=1 SV=1	Q8WXI9	288	101.53	T(0.36)T(0.36)T(0.279)PNMNPAINYQPQSSSSVPCQR	2	-0.28314
sp|Q8WYP5|ELYS_HUMAN Protein ELYS OS=Homo sapiens OX=9606 GN=AHCTF1 PE=1 SV=3	Q8WYP5	1190	75.911	S(0.004)LAMS(0.225)VT(0.751)T(0.01)S(0.003)GFS(0.005)EFTPQS(0.002)ILR	2	-0.0023783
sp|Q92616|GCN1_HUMAN Stalled ribosome sensor GCN1 OS=Homo sapiens OX=9606 GN=GCN1 PE=1 SV=7	Q92616	5	46.158	MAADT(0.996)QVS(0.004)ETLK	2	1.7538
sp|Q92733|PRCC_HUMAN Proline-rich protein PRCC OS=Homo sapiens OX=9606 GN=PRCC PE=1 SV=1	Q92733	226	54.09	T(0.351)S(0.351)S(0.293)LAPVVGTTTTTPS(0.003)PS(0.003)AIK	2	-0.3538
sp|Q92945|FUBP2_HUMAN Far upstream element-binding protein 2 OS=Homo sapiens OX=9606 GN=KHSRP PE=1 SV=4	Q92945	94	85.42	IGGDAAT(0.902)T(0.079)VNNS(0.018)T(0.001)PDFGFGGQK	2	-0.14169
sp|Q92945|FUBP2_HUMAN Far upstream element-binding protein 2 OS=Homo sapiens OX=9606 GN=KHSRP PE=1 SV=4	Q92945	95	85.42	IGGDAAT(0.499)T(0.499)VNNS(0.002)TPDFGFGGQK	2	0.13661
sp|Q92945|FUBP2_HUMAN Far upstream element-binding protein 2 OS=Homo sapiens OX=9606 GN=KHSRP PE=1 SV=4	Q92945	100	43.534	IGGDAAT(0.076)T(0.088)VNNS(0.104)T(0.732)PDFGFGGQK	3	-0.036604
sp|Q969T7|5NT3B_HUMAN 7-methylguanosine phosphate-specific 5'-nucleotidase OS=Homo sapiens OX=9606 GN=NT5C3B PE=1 SV=4	Q969T7	12	54.343	MAEEVS(0.028)T(0.044)LMKAT(0.928)VLMR	2	1.4026
sp|Q96A65|EXOC4_HUMAN Exocyst complex component 4 OS=Homo sapiens OX=9606 GN=EXOC4 PE=1 SV=1	Q96A65	566	76.332	TSDPLKILANADT(1)MK	2	-4.0467
sp|Q96BD5|PF21A_HUMAN PHD finger protein 21A OS=Homo sapiens OX=9606 GN=PHF21A PE=1 SV=1	Q96BD5	272	101.01	FT(0.066)PT(0.841)T(0.062)LPTS(0.006)QNS(0.025)IHPVR	3	0.028781
sp|Q96BD5|PF21A_HUMAN PHD finger protein 21A OS=Homo sapiens OX=9606 GN=PHF21A PE=1 SV=1	Q96BD5	273	63.681	FT(0.06)PT(0.376)T(0.558)LPT(0.001)S(0.003)QNS(0.002)IHPVR	3	0.3322
sp|Q96DF8|ESS2_HUMAN Splicing factor ESS-2 homolog OS=Homo sapiens OX=9606 GN=ESS2 PE=1 SV=1	Q96DF8	437	57.794	T(0.056)PAS(0.293)GLQT(0.401)PT(0.014)S(0.093)T(0.003)PAPGS(0.117)AT(0.022)R	2	-0.34131
sp|Q96HJ9|FMC1_HUMAN Protein FMC1 homolog OS=Homo sapiens OX=9606 GN=FMC1 PE=1 SV=2	Q96HJ9	10	66.692	MAALGS(0.145)PS(0.855)HT(1)FR	2	1.1578
sp|Q96KR1|ZFR_HUMAN Zinc finger RNA-binding protein OS=Homo sapiens OX=9606 GN=ZFR PE=1 SV=2	Q96KR1	199	52.045	AGYS(0.115)QGAT(0.566)QYT(0.318)QAQQT(0.001)R	3	0.13381
sp|Q96KR1|ZFR_HUMAN Zinc finger RNA-binding protein OS=Homo sapiens OX=9606 GN=ZFR PE=1 SV=2	Q96KR1	471	105.95	GLT(0.016)T(0.708)T(0.174)GNS(0.015)S(0.056)LNS(0.015)TS(0.015)NTK	2	0.15858
sp|Q96KR1|ZFR_HUMAN Zinc finger RNA-binding protein OS=Homo sapiens OX=9606 GN=ZFR PE=1 SV=2	Q96KR1	472	89.629	GLT(0.095)T(0.082)T(0.581)GNS(0.047)S(0.065)LNS(0.065)TS(0.065)NTK	2	-0.5204
sp|Q96KR1|ZFR_HUMAN Zinc finger RNA-binding protein OS=Homo sapiens OX=9606 GN=ZFR PE=1 SV=2	Q96KR1	423	65.118	LGKPIPS(0.159)T(0.797)EPNVVS(0.027)QATS(0.005)S(0.004)TAVS(0.004)AS(0.004)K	3	0.13643
sp|Q96KR1|ZFR_HUMAN Zinc finger RNA-binding protein OS=Homo sapiens OX=9606 GN=ZFR PE=1 SV=2	Q96KR1	102	98.133	PAPVAVAAAAT(0.998)AAAYGGYPT(0.002)AHTATDYGYTQR	4	0.15095
sp|Q96KR1|ZFR_HUMAN Zinc finger RNA-binding protein OS=Homo sapiens OX=9606 GN=ZFR PE=1 SV=2	Q96KR1	114	45.511	PAPVAVAAAAT(0.024)AAAYGGYPT(0.011)AHT(0.459)AT(0.459)DYGYT(0.046)QR	3	0.51496
sp|Q96KR1|ZFR_HUMAN Zinc finger RNA-binding protein OS=Homo sapiens OX=9606 GN=ZFR PE=1 SV=2	Q96KR1	116	45.511	PAPVAVAAAAT(0.024)AAAYGGYPT(0.011)AHT(0.459)AT(0.459)DYGYT(0.046)QR	3	0.51496
sp|Q96KR1|ZFR_HUMAN Zinc finger RNA-binding protein OS=Homo sapiens OX=9606 GN=ZFR PE=1 SV=2	Q96KR1	300	68.189	QAAAAAAAAAAT(0.991)AAWT(0.005)GT(0.001)T(0.001)FT(0.002)K	3	0.048172
sp|Q96KR1|ZFR_HUMAN Zinc finger RNA-binding protein OS=Homo sapiens OX=9606 GN=ZFR PE=1 SV=2	Q96KR1	135	104.42	QQEAPPPPPPAT(0.923)T(0.923)QNYQDS(0.077)YS(0.077)YVR	3	-0.15617
sp|Q96KR1|ZFR_HUMAN Zinc finger RNA-binding protein OS=Homo sapiens OX=9606 GN=ZFR PE=1 SV=2	Q96KR1	136	55.988	QQEAPPPPPPAT(0.923)T(0.923)QNYQDS(0.077)YS(0.077)YVR	3	-0.15617
sp|Q96KR1|ZFR_HUMAN Zinc finger RNA-binding protein OS=Homo sapiens OX=9606 GN=ZFR PE=1 SV=2	Q96KR1	529	84.507	S(0.483)T(0.483)PVTS(0.034)AVQIPEVK	2	-0.29095
sp|Q96KX2|CAZA3_HUMAN F-actin-capping protein subunit alpha-3 OS=Homo sapiens OX=9606 GN=CAPZA3 PE=1 SV=2	Q96KX2	2	52.683	T(0.929)LS(0.071)VLSRK	2	-3.1063
sp|Q96L91|EP400_HUMAN E1A-binding protein p400 OS=Homo sapiens OX=9606 GN=EP400 PE=1 SV=4	Q96L91	2605	62.891	AQPAIT(0.38)T(0.56)GGS(0.06)AAVLAGTIK	2	-0.36116
sp|Q96L91|EP400_HUMAN E1A-binding protein p400 OS=Homo sapiens OX=9606 GN=EP400 PE=1 SV=4	Q96L91	2707	53.328	AVT(0.318)S(0.318)VT(0.318)AS(0.045)AVVTTNLTPVQTPAR	2	0.44182
sp|Q96L91|EP400_HUMAN E1A-binding protein p400 OS=Homo sapiens OX=9606 GN=EP400 PE=1 SV=4	Q96L91	2710	53.328	AVT(0.318)S(0.318)VT(0.318)AS(0.045)AVVTTNLTPVQTPAR	2	0.44182
sp|Q96L91|EP400_HUMAN E1A-binding protein p400 OS=Homo sapiens OX=9606 GN=EP400 PE=1 SV=4	Q96L91	1488	59.367	T(0.99)AAPT(0.001)TAS(0.009)AAPQGPLR	2	-1.8509
sp|Q96LL3|FIMP_HUMAN Fertilization-influencing membrane protein OS=Homo sapiens OX=9606 GN=FIMP PE=1 SV=1	Q96LL3	11	52.725	GAGVGVAGCT(1)RGHR	2	-1.764
sp|Q96PK6|RBM14_HUMAN RNA-binding protein 14 OS=Homo sapiens OX=9606 GN=RBM14 PE=1 SV=2	Q96PK6	518	48.182	T(0.486)QS(0.395)S(0.086)AS(0.024)LAAS(0.005)YAAQQHPQAAAS(0.005)YR	3	-0.24943
sp|Q96RN5|MED15_HUMAN Mediator of RNA polymerase II transcription subunit 15 OS=Homo sapiens OX=9606 GN=MED15 PE=1 SV=2	Q96RN5	404	58.427	FPPT(0.639)T(0.206)AVS(0.095)AIPS(0.02)S(0.02)S(0.02)IPLGR	3	0.019752
sp|Q96RN5|MED15_HUMAN Mediator of RNA polymerase II transcription subunit 15 OS=Homo sapiens OX=9606 GN=MED15 PE=1 SV=2	Q96RN5	405	61.375	FPPT(0.367)T(0.516)AVS(0.027)AIPS(0.03)S(0.03)S(0.03)IPLGR	2	-0.29911
sp|Q96T58|MINT_HUMAN Msx2-interacting protein OS=Homo sapiens OX=9606 GN=SPEN PE=1 SV=1	Q96T58	2513	77.288	AQS(0.022)T(0.721)PS(0.257)PALPPDTK	2	-0.25259
sp|Q96T58|MINT_HUMAN Msx2-interacting protein OS=Homo sapiens OX=9606 GN=SPEN PE=1 SV=1	Q96T58	3290	41.695	ILT(0.035)VT(0.275)PS(0.275)NQLQGLPLT(0.046)PPVVVT(0.347)HGVQIVHS(0.011)S(0.011)GELFQEYR	4	0.98455
sp|Q96T58|MINT_HUMAN Msx2-interacting protein OS=Homo sapiens OX=9606 GN=SPEN PE=1 SV=1	Q96T58	3461	58.08	QPLFVPT(0.653)T(0.087)S(0.087)GPS(0.087)T(0.087)PPGLVLPHTEFQPAPK	3	0.42767
sp|Q96T58|MINT_HUMAN Msx2-interacting protein OS=Homo sapiens OX=9606 GN=SPEN PE=1 SV=1	Q96T58	3462	58.08	QPLFVPT(0.316)T(0.316)S(0.316)GPS(0.043)T(0.009)PPGLVLPHTEFQPAPK	3	0.96078
sp|Q96T58|MINT_HUMAN Msx2-interacting protein OS=Homo sapiens OX=9606 GN=SPEN PE=1 SV=1	Q96T58	2586	69.03	T(0.796)APPVT(0.169)NNS(0.033)EIQAS(0.002)EVLVAADK	3	0.61477
sp|Q96T58|MINT_HUMAN Msx2-interacting protein OS=Homo sapiens OX=9606 GN=SPEN PE=1 SV=1	Q96T58	2591	73.981	T(0.123)APPVT(0.54)NNS(0.052)EIQAS(0.285)EVLVAADKEK	3	-0.33861
sp|Q96T58|MINT_HUMAN Msx2-interacting protein OS=Homo sapiens OX=9606 GN=SPEN PE=1 SV=1	Q96T58	2476	45.558	VHS(0.029)IIES(0.032)DPVT(0.02)PPS(0.021)DPS(0.054)IPIPT(0.134)LPS(0.169)VT(0.542)AAK	3	0.20715
sp|Q96T58|MINT_HUMAN Msx2-interacting protein OS=Homo sapiens OX=9606 GN=SPEN PE=1 SV=1	Q96T58	2810	96.103	VNT(0.587)S(0.358)EGVVLLS(0.032)YS(0.023)GQK	2	0.17877
sp|Q99607|ELF4_HUMAN ETS-related transcription factor Elf-4 OS=Homo sapiens OX=9606 GN=ELF4 PE=1 SV=1	Q99607	379	44.915	IQHVGLQPS(0.007)AS(0.007)LELGPS(0.052)LDEEIPT(0.196)T(0.196)S(0.222)T(0.222)MLVS(0.097)PAEGQVK	3	0.83232
sp|Q99700|ATX2_HUMAN Ataxin-2 OS=Homo sapiens OX=9606 GN=ATXN2 PE=1 SV=2	Q99700	225	50.94	KPGGSGLLAS(0.001)PAAAPS(0.017)PS(0.06)S(0.06)S(0.06)S(0.06)VS(0.068)S(0.068)S(0.068)S(0.068)AT(0.257)APS(0.024)S(0.097)VVAAT(0.002)S(0.089)GGGR	4	0.35528
sp|Q99708|CTIP_HUMAN DNA endonuclease RBBP8 OS=Homo sapiens OX=9606 GN=RBBP8 PE=1 SV=2	Q99708	687	47.568	LGGET(0.966)VDMDCT(0.058)LVS(0.951)ET(0.025)VLLK	3	-1.8544
sp|Q9BRH9|ZN251_HUMAN Zinc finger protein 251 OS=Homo sapiens OX=9606 GN=ZNF251 PE=1 SV=4	Q9BRH9	247	52.372	AFT(0.906)HS(0.047)S(0.047)NLVLHHHIHT(1)GNK	3	-3.8023
sp|Q9BRH9|ZN251_HUMAN Zinc finger protein 251 OS=Homo sapiens OX=9606 GN=ZNF251 PE=1 SV=4	Q9BRH9	260	52.372	AFT(0.906)HS(0.047)S(0.047)NLVLHHHIHT(1)GNK	3	-3.8023
sp|Q9BS26|ERP44_HUMAN Endoplasmic reticulum resident protein 44 OS=Homo sapiens OX=9606 GN=ERP44 PE=1 SV=1	Q9BS26	367	49.888	EFHHGPDPT(0.609)DT(0.567)APGEQAQDVAS(0.274)S(0.118)PPES(0.217)S(0.214)FQK	3	-0.49862
sp|Q9BS26|ERP44_HUMAN Endoplasmic reticulum resident protein 44 OS=Homo sapiens OX=9606 GN=ERP44 PE=1 SV=1	Q9BS26	369	73.361	EFHHGPDPT(0.09)DT(0.826)APGEQAQDVAS(0.031)S(0.031)PPES(0.012)S(0.012)FQK	3	-0.58931
sp|Q9BSW2|EFC4B_HUMAN EF-hand calcium-binding domain-containing protein 4B OS=Homo sapiens OX=9606 GN=CRACR2A PE=1 SV=2	Q9BSW2	520	53.775	LT(0.042)PT(0.959)S(0.999)PR	1	0.80352
sp|Q9BT09|CNPY3_HUMAN Protein canopy homolog 3 OS=Homo sapiens OX=9606 GN=CNPY3 PE=1 SV=1	Q9BT09	155	41.53	VVMDIPYELWNET(0.99)S(0.01)AEVADLK	3	-0.44153
sp|Q9BTC0|DIDO1_HUMAN Death-inducer obliterator 1 OS=Homo sapiens OX=9606 GN=DIDO1 PE=1 SV=5	Q9BTC0	1288	72.163	VLS(0.037)S(0.037)LKPAAPS(0.127)PAT(0.496)AAT(0.465)T(0.665)AAAAS(0.032)T(0.02)AAS(0.024)S(0.024)T(0.021)AS(0.018)S(0.018)AS(0.017)K	3	-0.3836
sp|Q9BTC0|DIDO1_HUMAN Death-inducer obliterator 1 OS=Homo sapiens OX=9606 GN=DIDO1 PE=1 SV=5	Q9BTC0	1291	100.33	VLS(0.006)S(0.006)LKPAAPS(0.028)PAT(0.005)AAT(0.462)T(0.359)AAAAS(0.022)T(0.001)AAS(0.053)S(0.017)TAS(0.015)S(0.013)AS(0.013)K	3	-0.18245
sp|Q9BTC0|DIDO1_HUMAN Death-inducer obliterator 1 OS=Homo sapiens OX=9606 GN=DIDO1 PE=1 SV=5	Q9BTC0	1292	91.432	VLS(0.037)S(0.037)LKPAAPS(0.127)PAT(0.496)AAT(0.465)T(0.665)AAAAS(0.032)T(0.02)AAS(0.024)S(0.024)T(0.021)AS(0.018)S(0.018)AS(0.017)K	3	-0.3836
sp|Q9BTN0|LRFN3_HUMAN Leucine-rich repeat and fibronectin type-III domain-containing protein 3 OS=Homo sapiens OX=9606 GN=LRFN3 PE=2 SV=1	Q9BTN0	505	58.024	TYDLCVLAVYEDS(0.012)AT(0.804)GLT(0.182)AT(0.002)R	3	0.76524
sp|Q9BWF3|RBM4_HUMAN RNA-binding protein 4 OS=Homo sapiens OX=9606 GN=RBM4 PE=1 SV=1	Q9BWF3	297	45.511	HLLPTSGAAAT(0.001)AAAAAAAAAAVT(0.429)AAS(0.283)T(0.043)S(0.244)YYGR	3	0.13154
sp|Q9BYJ9|YTHD1_HUMAN YTH domain-containing family protein 1 OS=Homo sapiens OX=9606 GN=YTHDF1 PE=1 SV=1	Q9BYJ9	4	63.076	S(0.004)AT(0.494)S(0.494)VDT(0.001)QRT(0.007)K	2	3.6356
sp|Q9H0E3|SP130_HUMAN Histone deacetylase complex subunit SAP130 OS=Homo sapiens OX=9606 GN=SAP130 PE=1 SV=1	Q9H0E3	304	55.206	AQS(0.447)PVIT(0.544)T(0.556)T(0.309)AAHATDS(0.12)ALS(0.023)R	3	-0.11366
sp|Q9H0E3|SP130_HUMAN Histone deacetylase complex subunit SAP130 OS=Homo sapiens OX=9606 GN=SAP130 PE=1 SV=1	Q9H0E3	305	55.206	AQS(0.447)PVIT(0.544)T(0.556)T(0.309)AAHATDS(0.12)ALS(0.023)R	3	-0.11366
sp|Q9H0E3|SP130_HUMAN Histone deacetylase complex subunit SAP130 OS=Homo sapiens OX=9606 GN=SAP130 PE=1 SV=1	Q9H0E3	306	55.206	AQS(0.447)PVIT(0.544)T(0.556)T(0.309)AAHATDS(0.12)ALS(0.023)R	3	-0.11366
sp|Q9H0E3|SP130_HUMAN Histone deacetylase complex subunit SAP130 OS=Homo sapiens OX=9606 GN=SAP130 PE=1 SV=1	Q9H0E3	346	128.36	IT(0.997)LPS(0.003)HPALGTPK	3	-0.11607
sp|Q9H0E9|BRD8_HUMAN Bromodomain-containing protein 8 OS=Homo sapiens OX=9606 GN=BRD8 PE=1 SV=2	Q9H0E9	276	51.193	LLEAGPT(0.442)QFT(0.367)T(0.048)PLAS(0.07)FT(0.001)T(0.001)VAS(0.07)EPPVK	2	1.062
sp|Q9H0E9|BRD8_HUMAN Bromodomain-containing protein 8 OS=Homo sapiens OX=9606 GN=BRD8 PE=1 SV=2	Q9H0E9	279	74.786	LLEAGPT(0.025)QFT(0.46)T(0.46)PLAS(0.018)FT(0.01)T(0.01)VAS(0.018)EPPVK	2	-0.94838
sp|Q9H0E9|BRD8_HUMAN Bromodomain-containing protein 8 OS=Homo sapiens OX=9606 GN=BRD8 PE=1 SV=2	Q9H0E9	280	74.786	LLEAGPT(0.074)QFT(0.209)T(0.668)PLAS(0.022)FT(0.003)T(0.003)VAS(0.022)EPPVK	3	0.49965
sp|Q9HAP2|MLXIP_HUMAN MLX-interacting protein OS=Homo sapiens OX=9606 GN=MLXIP PE=1 SV=2	Q9HAP2	603	47.774	EGMLAS(0.308)T(0.308)VS(0.308)QS(0.075)NVVIAPAAIAR	2	-0.50165
sp|Q9HBM6|TAF9B_HUMAN Transcription initiation factor TFIID subunit 9B OS=Homo sapiens OX=9606 GN=TAF9B PE=1 SV=1	Q9HBM6	156	58.814	LS(0.015)VGAVS(0.067)S(0.067)KPT(0.246)T(0.246)PT(0.246)IAT(0.067)PQT(0.001)VS(0.045)VPNK	2	3.3312
sp|Q9HBM6|TAF9B_HUMAN Transcription initiation factor TFIID subunit 9B OS=Homo sapiens OX=9606 GN=TAF9B PE=1 SV=1	Q9HBM6	157	58.814	LS(0.015)VGAVS(0.067)S(0.067)KPT(0.246)T(0.246)PT(0.246)IAT(0.067)PQT(0.001)VS(0.045)VPNK	2	3.3312
sp|Q9HBM6|TAF9B_HUMAN Transcription initiation factor TFIID subunit 9B OS=Homo sapiens OX=9606 GN=TAF9B PE=1 SV=1	Q9HBM6	159	58.814	LS(0.015)VGAVS(0.067)S(0.067)KPT(0.246)T(0.246)PT(0.246)IAT(0.067)PQT(0.001)VS(0.045)VPNK	2	3.3312
sp|Q9HCG8|CWC22_HUMAN Pre-mRNA-splicing factor CWC22 homolog OS=Homo sapiens OX=9606 GN=CWC22 PE=1 SV=3	Q9HCG8	535	42.708	EYMES(0.001)FEGIFKEQYDT(0.999)IHR	3	1.7153
sp|Q9HCN3|PGAP6_HUMAN Post-GPI attachment to proteins factor 6 OS=Homo sapiens OX=9606 GN=PGAP6 PE=1 SV=3	Q9HCN3	409	43.066	ANKT(1)EMR	1	1.02
sp|Q9NPI6|DCP1A_HUMAN mRNA-decapping enzyme 1A OS=Homo sapiens OX=9606 GN=DCP1A PE=1 SV=3	Q9NPI6	491	66.828	VLS(0.169)S(0.169)AIPVAGAPLVT(0.449)AT(0.313)T(0.313)T(0.313)AVS(0.098)S(0.098)VLLAPS(0.077)VFQQTVTR	3	1.0117
sp|Q9NPI6|DCP1A_HUMAN mRNA-decapping enzyme 1A OS=Homo sapiens OX=9606 GN=DCP1A PE=1 SV=3	Q9NPI6	493	66.828	VLS(0.047)S(0.047)AIPVAGAPLVT(0.434)AT(0.434)T(0.434)T(0.434)AVS(0.122)S(0.046)VLLAPS(0.002)VFQQTVTR	4	-0.31062
sp|Q9NPI6|DCP1A_HUMAN mRNA-decapping enzyme 1A OS=Homo sapiens OX=9606 GN=DCP1A PE=1 SV=3	Q9NPI6	494	66.828	VLS(0.047)S(0.047)AIPVAGAPLVT(0.434)AT(0.434)T(0.434)T(0.434)AVS(0.122)S(0.046)VLLAPS(0.002)VFQQTVTR	4	-0.31062
sp|Q9NPI6|DCP1A_HUMAN mRNA-decapping enzyme 1A OS=Homo sapiens OX=9606 GN=DCP1A PE=1 SV=3	Q9NPI6	495	66.828	VLS(0.047)S(0.048)AIPVAGAPLVT(0.135)AT(0.134)T(0.134)T(0.476)AVS(0.4)S(0.378)VLLAPS(0.244)VFQQT(0.002)VT(0.002)R	3	1.2683
sp|Q9NQ75|CASS4_HUMAN Cas scaffolding protein family member 4 OS=Homo sapiens OX=9606 GN=CASS4 PE=1 SV=2	Q9NQ75	168	40.179	PVRAS(0.006)LPT(0.561)LPS(0.491)QVYDVPT(0.942)QHR	3	0.16695
sp|Q9NQ75|CASS4_HUMAN Cas scaffolding protein family member 4 OS=Homo sapiens OX=9606 GN=CASS4 PE=1 SV=2	Q9NQ75	178	40.179	PVRAS(0.006)LPT(0.561)LPS(0.491)QVYDVPT(0.942)QHR	3	0.16695
sp|Q9NTZ6|RBM12_HUMAN RNA-binding protein 12 OS=Homo sapiens OX=9606 GN=RBM12 PE=1 SV=1	Q9NTZ6	121	48.788	VNLPT(0.313)T(0.313)VS(0.142)NFNNPS(0.098)PS(0.092)VVT(0.003)AT(0.001)T(0.001)S(0.033)VHES(0.005)NK	3	0.30062
sp|Q9NTZ6|RBM12_HUMAN RNA-binding protein 12 OS=Homo sapiens OX=9606 GN=RBM12 PE=1 SV=1	Q9NTZ6	122	48.788	VNLPT(0.313)T(0.313)VS(0.142)NFNNPS(0.098)PS(0.092)VVT(0.003)AT(0.001)T(0.001)S(0.033)VHES(0.005)NK	3	0.30062
sp|Q9NXG2|THUM1_HUMAN THUMP domain-containing protein 1 OS=Homo sapiens OX=9606 GN=THUMPD1 PE=1 SV=2	Q9NXG2	8	48.44	AAPAQQT(1)T(1)QPGGGKR	2	-1.613
sp|Q9NXG2|THUM1_HUMAN THUMP domain-containing protein 1 OS=Homo sapiens OX=9606 GN=THUMPD1 PE=1 SV=2	Q9NXG2	9	48.44	AAPAQQT(1)T(1)QPGGGKR	2	-1.613
sp|Q9NXK6|PAQR5_HUMAN Membrane progestin receptor gamma OS=Homo sapiens OX=9606 GN=PAQR5 PE=1 SV=2	Q9NXK6	68	68.846	FVT(1)ALYMT(1)DIK	2	0.086846
sp|Q9NXK6|PAQR5_HUMAN Membrane progestin receptor gamma OS=Homo sapiens OX=9606 GN=PAQR5 PE=1 SV=2	Q9NXK6	73	68.846	FVT(1)ALYMT(1)DIK	2	0.086846
sp|Q9NYL4|FKB11_HUMAN Peptidyl-prolyl cis-trans isomerase FKBP11 OS=Homo sapiens OX=9606 GN=FKBP11 PE=1 SV=1	Q9NYL4	31	74.92	AEAGLET(0.981)ES(0.019)PVR	2	-4.1189
sp|Q9NZM1|MYOF_HUMAN Myoferlin OS=Homo sapiens OX=9606 GN=MYOF PE=1 SV=1	Q9NZM1	1349	43.544	T(0.836)PNFPS(0.136)S(0.028)VLFMKVFLPK	2	-3.0237
sp|Q9NZM4|BICRA_HUMAN BRD4-interacting chromatin-remodeling complex-associated protein OS=Homo sapiens OX=9606 GN=BICRA PE=1 SV=2	Q9NZM4	430	53.3	QPPAT(0.729)T(0.172)T(0.008)GAAPPQPPGALS(0.09)K	2	-0.04674
sp|Q9NZM4|BICRA_HUMAN BRD4-interacting chromatin-remodeling complex-associated protein OS=Homo sapiens OX=9606 GN=BICRA PE=1 SV=2	Q9NZM4	431	58.831	QPPAT(0.081)T(0.433)T(0.433)GAAPPQPPGALS(0.054)K	2	-0.33211
sp|Q9NZM4|BICRA_HUMAN BRD4-interacting chromatin-remodeling complex-associated protein OS=Homo sapiens OX=9606 GN=BICRA PE=1 SV=2	Q9NZM4	432	58.831	QPPAT(0.054)T(0.373)T(0.509)GAAPPQPPGALS(0.065)K	2	0.21623
sp|Q9NZN8|CNOT2_HUMAN CCR4-NOT transcription complex subunit 2 OS=Homo sapiens OX=9606 GN=CNOT2 PE=1 SV=1	Q9NZN8	111	50.757	S(0.006)LS(0.026)QGT(0.018)QLPS(0.141)HVT(0.675)PT(0.1)T(0.018)GVPT(0.004)MS(0.004)LHT(0.004)PPS(0.001)PS(0.001)R	4	0.56834
sp|Q9NZN8|CNOT2_HUMAN CCR4-NOT transcription complex subunit 2 OS=Homo sapiens OX=9606 GN=CNOT2 PE=1 SV=1	Q9NZN8	113	50.757	S(0.022)LS(0.133)QGT(0.004)QLPS(0.133)HVT(0.175)PT(0.175)T(0.155)GVPT(0.137)MS(0.022)LHT(0.001)PPS(0.022)PS(0.022)R	3	-0.80305
sp|Q9P2N5|RBM27_HUMAN RNA-binding protein 27 OS=Homo sapiens OX=9606 GN=RBM27 PE=1 SV=2	Q9P2N5	539	104.17	AANIVIQT(0.826)EPPVPVS(0.087)INS(0.087)NITR	2	-0.26284
sp|Q9P2N5|RBM27_HUMAN RNA-binding protein 27 OS=Homo sapiens OX=9606 GN=RBM27 PE=1 SV=2	Q9P2N5	598	89.142	KNQYT(1)NTK	2	0.65716
sp|Q9UBL3|ASH2L_HUMAN Set1/Ash2 histone methyltransferase complex subunit ASH2 OS=Homo sapiens OX=9606 GN=ASH2L PE=1 SV=1	Q9UBL3	91	45.011	DT(0.032)LEGAGDT(0.538)S(0.521)EVMDT(0.889)QAGS(0.02)VDEENGR	3	1.5333
sp|Q9UBL3|ASH2L_HUMAN Set1/Ash2 histone methyltransferase complex subunit ASH2 OS=Homo sapiens OX=9606 GN=ASH2L PE=1 SV=1	Q9UBL3	97	45.011	DT(0.032)LEGAGDT(0.538)S(0.521)EVMDT(0.889)QAGS(0.02)VDEENGR	3	1.5333
sp|Q9UHD9|UBQL2_HUMAN Ubiquilin-2 OS=Homo sapiens OX=9606 GN=UBQLN2 PE=1 SV=2	Q9UHD9	113	87.323	S(0.018)QNRPQGQS(0.014)T(0.847)QPS(0.057)NAAGT(0.026)NT(0.005)T(0.002)S(0.018)AS(0.012)TPR	2	-0.64655
sp|Q9UHD9|UBQL2_HUMAN Ubiquilin-2 OS=Homo sapiens OX=9606 GN=UBQLN2 PE=1 SV=2	Q9UHD9	121	47.937	S(0.003)QNRPQGQS(0.028)T(0.49)QPS(0.484)NAAGT(0.857)NT(0.046)T(0.046)S(0.024)AS(0.015)T(0.006)PR	3	0.88595
sp|Q9UHD9|UBQL2_HUMAN Ubiquilin-2 OS=Homo sapiens OX=9606 GN=UBQLN2 PE=1 SV=2	Q9UHD9	123	67.168	S(0.001)QNRPQGQS(0.001)TQPS(0.002)NAAGT(0.01)NT(0.477)T(0.165)S(0.165)AS(0.165)T(0.014)PR	2	-0.044841
sp|Q9UHD9|UBQL2_HUMAN Ubiquilin-2 OS=Homo sapiens OX=9606 GN=UBQLN2 PE=1 SV=2	Q9UHD9	124	43.099	S(0.033)QNRPQGQS(0.047)T(0.022)QPS(0.793)NAAGT(0.234)NT(0.229)T(0.229)S(0.23)AS(0.097)T(0.086)PR	3	-0.48383
sp|Q9UHR5|S30BP_HUMAN SAP30-binding protein OS=Homo sapiens OX=9606 GN=SAP30BP PE=1 SV=1	Q9UHR5	231	131.48	GT(0.691)T(0.605)T(0.605)NAT(0.059)S(0.01)T(0.001)TTTTAS(0.028)TAVADAQK	2	-0.3597
sp|Q9UHR5|S30BP_HUMAN SAP30-binding protein OS=Homo sapiens OX=9606 GN=SAP30BP PE=1 SV=1	Q9UHR5	232	105.39	KGT(0.65)T(0.65)T(0.65)NAT(0.01)S(0.02)T(0.005)T(0.002)T(0.001)TTAS(0.013)TAVADAQK	2	-0.89689
sp|Q9UHR5|S30BP_HUMAN SAP30-binding protein OS=Homo sapiens OX=9606 GN=SAP30BP PE=1 SV=1	Q9UHR5	233	105.39	KGT(0.65)T(0.65)T(0.65)NAT(0.01)S(0.02)T(0.005)T(0.002)T(0.001)TTAS(0.013)TAVADAQK	2	-0.89689
sp|Q9UHR5|S30BP_HUMAN SAP30-binding protein OS=Homo sapiens OX=9606 GN=SAP30BP PE=1 SV=1	Q9UHR5	236	89.866	KGT(0.192)T(0.192)T(0.626)NAT(0.679)S(0.188)T(0.047)T(0.011)TTTAS(0.064)TAVADAQK	2	-0.064776
sp|Q9UHR5|S30BP_HUMAN SAP30-binding protein OS=Homo sapiens OX=9606 GN=SAP30BP PE=1 SV=1	Q9UHR5	238	65.753	KGT(0.096)T(0.096)T(0.096)NAT(0.006)S(0.064)T(0.187)T(0.187)T(0.066)T(0.066)T(0.025)AS(0.109)T(0.001)AVADAQK	3	0.3431
sp|Q9UHR5|S30BP_HUMAN SAP30-binding protein OS=Homo sapiens OX=9606 GN=SAP30BP PE=1 SV=1	Q9UHR5	239	65.753	KGT(0.096)T(0.096)T(0.096)NAT(0.006)S(0.064)T(0.187)T(0.187)T(0.066)T(0.066)T(0.025)AS(0.109)T(0.001)AVADAQK	3	0.3431
sp|Q9UKD1|GMEB2_HUMAN Glucocorticoid modulatory element-binding protein 2 OS=Homo sapiens OX=9606 GN=GMEB2 PE=1 SV=1	Q9UKD1	404	79.489	VVS(0.041)T(0.916)LPS(0.041)T(0.001)VLGK	2	0.32492
sp|Q9UKF6|CPSF3_HUMAN Cleavage and polyadenylation specificity factor subunit 3 OS=Homo sapiens OX=9606 GN=CPSF3 PE=1 SV=1	Q9UKF6	504	40.381	NFNYHILS(0.003)PCDLS(0.046)NYT(0.933)DLAMS(0.009)T(0.008)VK	3	1.2888
sp|Q9UKY1|ZHX1_HUMAN Zinc fingers and homeoboxes protein 1 OS=Homo sapiens OX=9606 GN=ZHX1 PE=1 SV=1	Q9UKY1	252	41.861	IHPS(0.09)T(0.09)AS(0.081)T(0.04)VVT(0.544)PAAVLPGLAQVIT(0.134)AVS(0.014)AQQNS(0.007)NLIPK	4	-0.21831
sp|Q9UKY1|ZHX1_HUMAN Zinc fingers and homeoboxes protein 1 OS=Homo sapiens OX=9606 GN=ZHX1 PE=1 SV=1	Q9UKY1	265	42.571	IHPS(0.008)T(0.003)AS(0.008)T(0.003)VVT(0.019)PAAVLPGLAQVIT(0.848)AVS(0.089)AQQNS(0.023)NLIPK	3	0.036468
sp|Q9ULM3|YETS2_HUMAN YEATS domain-containing protein 2 OS=Homo sapiens OX=9606 GN=YEATS2 PE=1 SV=2	Q9ULM3	1165	97.64	IPLIT(1)AK	2	-0.0051822
sp|Q9ULM3|YETS2_HUMAN YEATS domain-containing protein 2 OS=Homo sapiens OX=9606 GN=YEATS2 PE=1 SV=2	Q9ULM3	604	48.204	QEPGEAPHVPAT(0.361)GAAS(0.319)QS(0.319)PLPQYVTVK	3	-0.28926
sp|Q9ULU4|ZMYD8_HUMAN MYND-type zinc finger-containing chromatin reader ZMYND8 OS=Homo sapiens OX=9606 GN=ZMYND8 PE=1 SV=2	Q9ULU4	746	52.045	T(0.81)PPS(0.13)T(0.026)T(0.024)VGS(0.006)HS(0.004)PPETPVLTR	3	-0.34835
sp|Q9ULU4|ZMYD8_HUMAN MYND-type zinc finger-containing chromatin reader ZMYND8 OS=Homo sapiens OX=9606 GN=ZMYND8 PE=1 SV=2	Q9ULU4	750	50.957	T(0.051)PPS(0.162)T(0.212)T(0.212)VGS(0.181)HS(0.181)PPETPVLTR	3	0.46008
sp|Q9ULU4|ZMYD8_HUMAN MYND-type zinc finger-containing chromatin reader ZMYND8 OS=Homo sapiens OX=9606 GN=ZMYND8 PE=1 SV=2	Q9ULU4	751	50.957	T(0.051)PPS(0.162)T(0.212)T(0.212)VGS(0.181)HS(0.181)PPETPVLTR	3	0.46008
sp|Q9UMR7|CLC4A_HUMAN C-type lectin domain family 4 member A OS=Homo sapiens OX=9606 GN=CLEC4A PE=1 SV=1	Q9UMR7	6	56.359	MTS(1)EIT(1)YAEVR	2	1.5123
sp|Q9UMX6|GUC1B_HUMAN Guanylyl cyclase-activating protein 2 OS=Homo sapiens OX=9606 GN=GUCA1B PE=1 SV=4	Q9UMX6	134	54.199	RELQT(1)EQGQLLTPEEVVDR	2	2.1334
sp|Q9UN71|PCDGG_HUMAN Protocadherin gamma-B4 OS=Homo sapiens OX=9606 GN=PCDHGB4 PE=2 SV=1	Q9UN71	399	82.452	ILTS(0.137)S(0.137)RNT(0.726)YK	2	0.41152
sp|Q9UPN6|SCAF8_HUMAN SR-related and CTD-associated factor 8 OS=Homo sapiens OX=9606 GN=SCAF8 PE=1 SV=1	Q9UPN6	614	72.848	ET(0.018)VQT(0.898)T(0.034)QS(0.051)PTPVEK	2	-0.41618
sp|Q9UQ35|SRRM2_HUMAN Serine/arginine repetitive matrix protein 2 OS=Homo sapiens OX=9606 GN=SRRM2 PE=1 SV=2	Q9UQ35	2329	59.418	T(0.987)PQAPAS(0.013)ANLVGPR	2	0.19044
sp|Q9Y2U5|M3K2_HUMAN Mitogen-activated protein kinase kinase kinase 2 OS=Homo sapiens OX=9606 GN=MAP3K2 PE=1 SV=2	Q9Y2U5	516	70.1	LQT(0.027)ICLS(0.125)GT(0.848)GMK	2	-0.4977
sp|Q9Y4B4|ARIP4_HUMAN Helicase ARIP4 OS=Homo sapiens OX=9606 GN=RAD54L2 PE=1 SV=4	Q9Y4B4	1073	83.936	VVT(0.665)T(0.665)T(0.665)DIVIPGLNS(0.002)S(0.002)TDVQAR	3	0.45671
sp|Q9Y4B4|ARIP4_HUMAN Helicase ARIP4 OS=Homo sapiens OX=9606 GN=RAD54L2 PE=1 SV=4	Q9Y4B4	1074	111.62	VVT(0.04)T(0.966)T(0.994)DIVIPGLNSSTDVQAR	3	-0.27961
sp|Q9Y4B4|ARIP4_HUMAN Helicase ARIP4 OS=Homo sapiens OX=9606 GN=RAD54L2 PE=1 SV=4	Q9Y4B4	1075	111.62	VVT(0.04)T(0.966)T(0.994)DIVIPGLNSSTDVQAR	3	-0.27961
sp|Q9Y4D2|DGLA_HUMAN Diacylglycerol lipase-alpha OS=Homo sapiens OX=9606 GN=DAGLA PE=1 SV=3	Q9Y4D2	779	48.608	RAPLAT(0.846)MES(0.078)LS(0.083)DT(0.831)ES(0.079)LYS(0.042)FDS(0.04)R	2	-0.55533
sp|Q9Y4D2|DGLA_HUMAN Diacylglycerol lipase-alpha OS=Homo sapiens OX=9606 GN=DAGLA PE=1 SV=3	Q9Y4D2	786	48.608	RAPLAT(0.846)MES(0.078)LS(0.083)DT(0.831)ES(0.079)LYS(0.042)FDS(0.04)R	2	-0.55533
sp|Q9Y4K1|CRBG1_HUMAN Beta/gamma crystallin domain-containing protein 1 OS=Homo sapiens OX=9606 GN=CRYBG1 PE=1 SV=3	Q9Y4K1	1523	71.614	KIELNAET(1)VNLR	2	1.2371
sp|Q9Y520|PRC2C_HUMAN Protein PRRC2C OS=Homo sapiens OX=9606 GN=PRRC2C PE=1 SV=4	Q9Y520	2243	43.768	RET(0.001)IQQS(0.2)S(0.069)S(0.069)LT(0.004)S(0.072)VPPT(0.03)T(0.297)FS(0.154)LT(0.103)FK	3	0.79697
sp|Q9Y5H0|PCDG3_HUMAN Protocadherin gamma-A3 OS=Homo sapiens OX=9606 GN=PCDHGA3 PE=2 SV=2	Q9Y5H0	2	56.81	T(0.99)NCLS(0.01)FRNGR	2	-0.69151
sp|Q9Y5Q8|TF3C5_HUMAN General transcription factor 3C polypeptide 5 OS=Homo sapiens OX=9606 GN=GTF3C5 PE=1 SV=2	Q9Y5Q8	356	56.359	KT(0.549)S(0.355)S(0.095)QLVTMHDLK	2	-3.0635
sp|Q9Y618|NCOR2_HUMAN Nuclear receptor corepressor 2 OS=Homo sapiens OX=9606 GN=NCOR2 PE=1 SV=3	Q9Y618	2131	84.829	VVT(0.979)LAQHIS(0.021)EVITQDYTR	3	-0.10244
