# Supplementary material for: A constitutional isomer selective chemical proteomic strategy for system-wide profiling of protein lysine 5-hydroxylation
Source: Chem Sci. 2024 Oct 8;15(44):18395–404. doi: 10.1039/d4sc05397d (PMC11474802; doi:10.1039/d4sc05397d)
Supplement: SC-015-D4SC05397D-s005 [file SC-015-D4SC05397D-s005.xlsx]

## Sheet: Biological Processes
Annotation ID	Description (Biological Processes)	FDR
GO:0006397	mRNA processing	0
GO:0022613	ribonucleoprotein complex biogenesis	0
GO:0008380	RNA splicing	0
GO:0016072	rRNA metabolic process	0
GO:0034470	ncRNA processing	1.39666e-12
GO:1903311	regulation of mRNA metabolic process	4.50482e-07
GO:0006403	RNA localization	1.45043e-06
GO:0006333	chromatin assembly or disassembly	3.7775e-06
GO:0006401	RNA catabolic process	4.10327e-06
GO:0071103	DNA conformation change	4.10327e-06
GO:0071166	ribonucleoprotein complex localization	4.41066e-06
GO:0015931	nucleobase-containing compound transport	9.42417e-05
GO:0051169	nuclear transport	0.000265375
GO:0071824	protein-DNA complex subunit organization	0.00053795
GO:0033044	regulation of chromosome organization	0.00055258
GO:0006413	translational initiation	0.000911089
GO:0040029	regulation of gene expression, epigenetic	0.00113245
GO:0002181	cytoplasmic translation	0.00165905
GO:0051052	regulation of DNA metabolic process	0.00458682
GO:0098760	response to interleukin-7	0.00642611
GO:0006338	chromatin remodeling	0.00834523
GO:0016073	snRNA metabolic process	0.00897645
GO:0010608	posttranscriptional regulation of gene expression	0.0113258
GO:0071826	ribonucleoprotein complex subunit organization	0.012329
GO:0031123	RNA 3'-end processing	0.014412
GO:0031503	protein-containing complex localization	0.0192281
GO:0044839	cell cycle G2/M phase transition	0.0206629
GO:0010639	negative regulation of organelle organization	0.0333163
GO:0016458	gene silencing	0.0333163
GO:0006310	DNA recombination	0.0333163
GO:0006354	DNA-templated transcription, elongation	0.0350405
GO:0034248	regulation of cellular amide metabolic process	0.0466882
GO:0098781	ncRNA transcription	0.0492405
GO:0032200	telomere organization	0.0492405

## Sheet: Cellular Compartment
Annotation ID	Description (Celluar Compartment)	FDR
GO:0016607	nuclear speck	1.0969e-09
GO:0005681	spliceosomal complex	1.55192e-06
GO:0015030	Cajal body	4.15262e-06
GO:0030684	preribosome	1.12408e-05
GO:0005732	small nucleolar ribonucleoprotein complex	6.43617e-05
GO:0032993	protein-DNA complex	6.6521e-05
GO:0044815	DNA packaging complex	0.000382147
GO:0000793	condensed chromosome	0.00111755
GO:0000792	heterochromatin	0.00186712
GO:0044452	nucleolar part	0.00186712
GO:0017053	transcriptional repressor complex	0.00357726
GO:0098687	chromosomal region	0.0177752
GO:0005844	polysome	0.0219946
GO:0035145	exon-exon junction complex	0.0345633
GO:0043292	contractile fiber	0.043563
GO:0005840	ribosome	0.0481084

## Sheet: Molecular Function
Annotation ID	Description (Molecular Function)	FDR
GO:0031491	nucleosome binding	4.68215e-08
GO:0031490	chromatin DNA binding	2.02029e-06
GO:0003729	mRNA binding	7.47998e-05
GO:0140030	modification-dependent protein binding	0.00145042
GO:0042393	histone binding	0.00246783
GO:0050839	cell adhesion molecule binding	0.00264675
GO:0030515	snoRNA binding	0.00519033
GO:0004386	helicase activity	0.00539697
GO:0003779	actin binding	0.00842398
GO:0008135	translation factor activity, RNA binding	0.012271
GO:0005516	calmodulin binding	0.0133246
GO:0003697	single-stranded DNA binding	0.0453794
GO:0035326	enhancer binding	0.0499931
GO:0001098	basal transcription machinery binding	0.0499931
