# Supplementary material for: A constitutional isomer selective chemical proteomic strategy for system-wide profiling of protein lysine 5-hydroxylation
Source: Chem Sci. 2024 Oct 8;15(44):18395–404. doi: 10.1039/d4sc05397d (PMC11474802; doi:10.1039/d4sc05397d)
Supplement: SC-015-D4SC05397D-s006 [file SC-015-D4SC05397D-s006.xlsx]

## Sheet: Table S5
Gene Name	Hyl Site	Normalized Intensities (x10^6)									Upregulated Splice Form	Ttest p value
		Control01	Control02	Control03	LongJMJD6flag01	LongJMJD6flag02	LongJMJD6flag03	ShortJMJD6flag01	ShortJMJD6flag02	ShortJMJD6flag03
HMGA1	K15	0	0	0	2166.73	4016.39	0	17672.6	19430.3	22805.3	Short	0.000476299
C1orf131	K239	0	0	0	0	0	0	24554	27081.5	22758.8	Short	0.00127331
C1orf131	K240	0	0	0	0	0	0	24554	27081.5	22758.8	Short	0.00127331
NPM1	K193	0	0	0	0	107910	12255.5	245111	276817	370180	Short	0.0036444
HMGA1	K7	0	0	0	76132.8	93006.5	77207.3	380554	335322	270382	Short	0.00717501
HMGN2	K54	0	0	0	5724	7257	6464.99	21930.8	24971.8	31366.3	Short	0.00876308
HMGN2	K56	0	0	0	5724	7257	6464.99	21930.8	24971.8	31366.3	Short	0.00876308
HMGN2	K57	0	0	0	5724	7257	6464.99	21930.8	24971.8	31366.3	Short	0.00876308
HMGN2	K59	0	0	0	5724	7257	6464.99	21930.8	24971.8	31366.3	Short	0.00876308
HMGN3	K17	0	0	0	4135.83	5314.14	4394.84	12764.7	17888.9	18827.7	Short	0.0105703
THRAP3	K3	0	0	0	0	0	2427.31	10144.1	5292.64	6794.17	Short	0.0126551
THRAP3	K6	0	0	0	0	0	2427.31	10144.1	5292.64	6794.17	Short	0.0126551
HMGN3	K20	0	0	0	4135.83	5314.14	4394.84	12192.5	17400.4	18827.7	Short	0.0131208
HMGA2	K58	0	0	0	13636.8	12832.1	0	28165.2	54743.9	48057.2	Short	0.0147489
NPM1	K194	0	0	0	0	84838.4	0	162087	186298	306047	Short	0.0150282
RPL5	K276	0	0	0	7231.8	4772.72	0	11161.1	11932.3	15274.9	Short	0.016578
RSL1D1	K448	0	0	0	0	18224.8	0	22376.5	46403.5	40609.7	Short	0.0169103
RSL1D1	K449	0	0	0	0	18224.8	0	22376.5	46403.5	40609.7	Short	0.0169103
RRP15	K179	0	0	0	0	8029.9	0	19375.1	19904.2	9769.37	Short	0.0170887
RRP15	K182	0	0	0	0	8029.9	0	19375.1	19904.2	9769.37	Short	0.0170887
NFYA	K270	0	0	0	36778.7	21727.1	16736.3	39054.9	54664.2	54259.8	Short	0.0194033
DKC1	K14	0	0	0	5161.15	9972.03	7342.05	14198.8	13048.8	11330.5	Short	0.0199722
DKC1	K15	0	0	0	5161.15	9972.03	7342.05	14198.8	13048.8	11330.5	Short	0.0199722
DKC1	K16	0	0	0	5161.15	9972.03	7342.05	14198.8	13048.8	11330.5	Short	0.0199722
DKC1	K17	0	0	0	5161.15	9972.03	7342.05	14198.8	13048.8	11330.5	Short	0.0199722
KPNA2	K20	0	0	0	10058.9	7651.91	6017.84	11854.1	11193.9	14008	Short	0.0211715
KPNA2	K22	0	0	0	10058.9	7651.91	6017.84	11854.1	11193.9	14008	Short	0.0211715
LYAR	K288	0	0	0	9033.62	9360.05	0	12938	20162.7	22649.3	Short	0.0211791
NONO	K5	0	0	0	87376.8	61428.4	152547	189675	259943	176404	Short	0.0224294
DLGAP4	K170	0	4700.32	5167.94	7199.85	0	0	9079.48	14803.8	21172.2	Short	0.023783
DLGAP4	K171	0	4700.32	5167.94	7199.85	0	0	9079.48	14803.8	21172.2	Short	0.023783
H1FX	K207	0	0	0	0	0	0	6578.02	12716.8	15545.9	Short	0.0241097
H1FX	K210	0	0	0	0	0	0	6578.02	12716.8	15545.9	Short	0.0241097
PAK1IP1	K363	0	0	0	13263	14547.5	0	36435.2	28532.6	19189.4	Short	0.0256801
PAK1IP1	K359	0	0	0	18827.6	19580.1	3979.79	39979.9	33583	24548.9	Short	0.0263063
PAK1IP1	K360	0	0	0	18827.6	19580.1	3979.79	39979.9	33583	24548.9	Short	0.0263063
HMGB1P1	K167	0	0	0	0	0	0	569.415	1431.18	1062.08	Short	0.0274544
HIST1H2BK	K12	0	0	0	27649.8	47871.2	32813.6	140561	291299	303595	Short	0.0278658
HIST1H2BD	K12	0	0	0	27649.8	45761.7	30439.5	135965	283857	303595	Short	0.0291274
HIST2H2BF	K12	0	0	0	27649.8	45761.7	30439.5	135965	283857	303595	Short	0.0291274
RRBP1	K589	0	0	0	0	0	0	336.913	888.445	659.198	Short	0.0295756
RRBP1	K598	0	0	0	0	0	0	336.913	888.445	659.198	Short	0.0295756
RRBP1	K599	0	0	0	0	0	0	336.913	888.445	659.198	Short	0.0295756
HIST1H2BD	K13	0	0	0	28776.8	46380.9	30439.5	135965	285208	306397	Short	0.0296937
HIST1H2BK	K13	0	0	0	28776.8	46380.9	30439.5	135965	285208	306397	Short	0.0296937
HIST2H2BF	K13	0	0	0	28776.8	46380.9	30439.5	135965	285208	306397	Short	0.0296937
HMGB1	K82	0	0	0	46154.1	44501.7	43544.1	103263	184875	203472	Short	0.0303153
TOP2A	K1422	0	0	0	720.502	0	532.477	1257.03	1126.11	984.833	Short	0.0342081
DDX21	K54	0	0	0	0	6488.79	0	6480.4	10997.1	8699.52	Short	0.0366904
DDX21	K56	0	0	0	0	6488.79	0	6480.4	10997.1	8699.52	Short	0.0366904
DDX21	K59	0	0	0	0	6488.79	0	6480.4	10997.1	8699.52	Short	0.0366904
NCL	K87	0	0	0	10842.5	0	1126.67	11622.1	35262.4	32028.6	Short	0.0382863
NCL	K88	0	0	0	10842.5	0	1126.67	11622.1	35262.4	32028.6	Short	0.0382863
SNRPB2	K103	0	0	0	0	0	0	3444.12	11260.2	10162.3	Short	0.0384865
SNRPB2	K104	0	0	0	0	0	0	3444.12	11260.2	10162.3	Short	0.0384865
SNRPB2	K105	0	0	0	0	0	0	3444.12	11260.2	10162.3	Short	0.0384865
SNRPB2	K107	0	0	0	0	0	0	3444.12	11260.2	10162.3	Short	0.0384865
SNRPB2	K108	0	0	0	0	0	0	3444.12	11260.2	10162.3	Short	0.0384865
SNRPB2	K109	0	0	0	0	0	0	3444.12	11260.2	10162.3	Short	0.0384865
HDGF	K39	0	0	0	30881.7	48753.2	23979.2	46242.3	78661.3	64477.5	Short	0.0391766
HMGB1	K76	0	0	0	65172.7	57612.5	51515	109895	206589	235453	Short	0.0393222
H1F0	K14	0	0	0	3109.44	2947.15	2461.17	4905.28	9207.66	10182	Short	0.0406365
HMGN1	K14	149.411	0	0	140576	145590	86820.9	189360	340237	233316	Short	0.0424533
PHC1	K843	0	0	0	0	2239.05	9036.08	7230.75	18134.9	14370.7	Short	0.0441643
NPM1	K239	0	0	0	104133	117551	115257	214059	453247	506331	Short	0.044879
PIN4	K26	0	0	0	572.722	0	0	1156.47	4118.47	2959.75	Short	0.0455602
PIN4	K27	0	0	0	572.722	0	0	1156.47	4118.47	2959.75	Short	0.0455602
HMGN1	K42	0	0	0	115597	146753	79629.3	164013	350991	307667	Short	0.0462534
HMGB1	K86	0	0	0	8688.3	6162.64	3261.47	19012.2	44283.7	60984.5	Short	0.0494027
DDX21	K91	0	0	0	9926.3	15523	10911.8	16534.8	34598	29372.4	Short	0.0499304
DDX21	K93	0	0	0	9926.3	15523	10911.8	16534.8	34598	29372.4	Short	0.0499304
DST	K7141	0	0	0	7388.98	6999.61	9808.81	0	0	0	Long	0.00583083
COL6A5	K564	2000.61	0	2716.95	5753.36	3843.59	4366.43	0	0	0	Long	0.00732909
RBM39	K103	9051.59	10539.7	11979.5	50217.3	63829.5	55497.4	15049.9	34170.2	29784.1	Long	0.00818913
PACRG	K12	0	1040.94	0	1835.67	1148.47	1561.98	0	0	0	Long	0.008467
ACLY	K732	5557.43	0	0	10696.3	7784.02	10817.2	5005.53	0	0	Long	0.0106637
CPSF2	K472	0	0	0	10106.7	8831.59	5805.45	0	0	0	Long	0.0115451
PES1	K564	0	215.46	0	579.016	439.114	334.284	0	0	0	Long	0.0119234
PES1	K568	0	215.46	0	579.016	439.114	334.284	0	0	0	Long	0.0119234
MYH9	K64	0	0	0	3212.1	2680.9	1698.74	0	0	0	Long	0.0146708
MYH9	K66	0	0	0	3212.1	2680.9	1698.74	0	0	0	Long	0.0146708
MYH9	K69	0	0	0	3212.1	2680.9	1698.74	0	0	0	Long	0.0146708
UPF3B	K422	0	0	0	5127.91	3432.7	2529.73	1798.43	0	0	Long	0.0178195
UPF3B	K427	0	0	0	5127.91	3432.7	2529.73	1798.43	0	0	Long	0.0178195
PAPOLB	K483	8687.16	5668.58	11564.9	14297.4	12167.2	13898.3	10931.7	9549.75	7129.46	Long	0.020517
PHACTR3	K440	0	0	0	807.737	347.655	523.115	0	0	0	Long	0.0264465
PHACTR3	K443	0	0	0	807.737	347.655	523.115	0	0	0	Long	0.0264465
TWISTNB	K227	0	0	0	3564.59	5626.61	2440.53	0	0	0	Long	0.0266547
TWISTNB	K228	0	0	0	3564.59	5626.61	2440.53	0	0	0	Long	0.0266547
TWISTNB	K229	0	0	0	3564.59	5626.61	2440.53	0	0	0	Long	0.0266547
TWISTNB	K230	0	0	0	3564.59	5626.61	2440.53	0	0	0	Long	0.0266547
TWISTNB	K231	0	0	0	3564.59	5626.61	2440.53	0	0	0	Long	0.0266547
FEN1	K356	0	0	0	8016.69	13484.8	5954.5	0	0	0	Long	0.0276558
FEN1	K361	0	0	0	8016.69	13484.8	5954.5	0	0	0	Long	0.0276558
FEN1	K365	0	0	0	8016.69	13484.8	5954.5	0	0	0	Long	0.0276558
FEN1	K366	0	0	0	8016.69	13484.8	5954.5	0	0	0	Long	0.0276558
BRD4	K537	67944	74314	73103.9	209322	134243	103580	14256.2	76512.2	39447.5	Long	0.0285993
BRD4	K538	67944	74314	73103.9	209322	134243	103580	14256.2	76512.2	39447.5	Long	0.0285993
RBM5	K528	85798.7	18646.4	96399.5	72095.4	65028.3	55176	15747.7	50282	28825.1	Long	0.0325521
RBM5	K529	85798.7	18646.4	96399.5	72095.4	65028.3	55176	15747.7	50282	28825.1	Long	0.0325521
RBM5	K531	85798.7	18646.4	96399.5	72095.4	65028.3	55176	15747.7	50282	28825.1	Long	0.0325521
INAFM2	K24	12816.8	8847.49	13312.5	13230.8	12501.3	11895.5	4696.46	10064.8	7245.36	Long	0.0353281
INAFM2	K31	12816.8	8847.49	13312.5	13230.8	12501.3	11895.5	4696.46	10064.8	7245.36	Long	0.0353281
SRSF11	K242	110945	99625.4	112743	147702	95566	87999.3	32330.2	66156.9	64260.9	Long	0.0378851
DCAF13	K398	0	0	0	27196.4	24499.7	14858.3	9013.81	10027.4	12461.8	Long	0.0400693
CKAP5	K511	0	0	0	190.787	412.258	504.204	0	258.722	0	Long	0.0450047
CKAP5	K515	0	0	0	190.787	412.258	504.204	0	258.722	0	Long	0.0450047
RAB34	K79	5648.69	5789.77	12727.9	13460.2	17854.3	8968.08	8442.95	7781.76	3228.97	Long	0.0482305
